# Supplementary material for: Extreme expansion of the olfactory receptor gene repertoire in African elephants and evolutionary dynamics of orthologous gene groups in 13 placental mammals
Source: HighWire-hosted journal article supplement (doi:10.1101/gr.169532.113), 2014-07-22
Supplement: Supplemental_Dataset_S1.docx [file Supplemental_Dataset_S1.docx]

**Dataset S1.** Nucleotide sequences of the OR genes in African elephants, horses, cows, rabbits, guinea pigs, or mice. “Loaf”, “Bota”, “Eqca”, “Orcu”, “Capo”, and “Mm” represent African elephant, cow, horse, rabbit, guinea pig, and mouse, respectively. A gene name with “P” and “T” indicate a pseudogene and a truncated gene, respectively. A slash in a nucleotide sequence represents a frameshift mutation.

>LoafORs1.1P

ACCAGAATTCTATATCTAGGGAAAATGTCTTTTACAAATGAAAGAGAGTGGCCCATGCTG

TGGACAGCTATCCTGGTGGCCAATATGGCCACAATACTGGGCAGCTACATACTAGTGGGG

CTGATTCCACTGGACCAGTAGCTTTACCAGCCCATGTACCACCTGCTAACCCACCTGCCA

CTGTTAGACACTGCTTATGTGAGCACCACACTCCCACAGGCACCGGTGCACATGGCTTCC

CAACATGTCACTCTCTCTCTAGCATGCTGTGGGACCCATCTCAATGTGAATGATTCCCTG

GGCAGCTGCAAGGCTATCCTCCTGGCTGCCATGGCCCTTTATTGCTGCCTGGCCATGTGC

TAGCCCCTGTGCTATGCAGCCATCATGACACCCACACACTGT/TGGGCGTTGAGTTTTCT

GTTGTCTGTGCCCAACACTGTGGCTGCACTGTGCCTGTTCTTCTGCCCTGGGAGGTACTC

AATAAACTACTTCATCTAAGAGCTGCCCATTGTGCTGAAGACAACATGTGCAGACACAAC

AGCCAACCACATGCTTGTCTATAGCCTGGACACACCCATTCTCTTGATGATTTTGGTCTT

CATCCTTGCCTTGTACACTATGATTCTGGAGGCTCTGGTCAAGCTTGCTTCTACCAGGAG

CTGCCTCAATGCACTGTCCACCTGCAGCTCACACCTAGCTGTGATGGGTCTCTTTTATGG

CACCATGACCACCAGGTACCTGGGCTGCTATGGCTCCATTGCCCTCCCAAACAAGCACCA

CAGG

>LoafORs1.2P

ATGGCCAGACAAAATGATTCCAGAGTGACTGACTTTGTTCTCGAGGGATTGACAGGCTAA

CCAGAACTCCACTCGCCTCCCTTCCTCTTATTCCTAGCAATCTATAGTGTCACTGTCATG

GGAAATGTGGGTATAATCTTTCTAATCGCTTTCAATTCCAAGCTGCAAGCTCCCATGTAC

TTTTTTCTTAGCAATTTGTCAGCCATAGATCTCTTTTATTCCTGAGTTATTACCCCCAAA

CTCCTGGAAAACTTTGTATTGGAGCAAAATATTACTTCGTACCCTGCATGTATGACACAC

TTTTTTTTCTTTTGCTTCTTTGCTACTGCTGAGTGCTACATGTTAACTGCCATGGCGTAT

GATAGATATGCAGCTATCTGTAGTCCACTGTTCTACAATGTCGTCATGTCCCAAAAGGTC

TGTAATGTGCTGATGACTGAAGCTTATATCATGGCATCTATTGGAGCTGTGCCCCACATG

ATCTCCATGATCGAGCTTTCCTTCTGTGGGGACAATGTCATTCACCATTTCTTCTGTGAC

GTGCTTCCTCTCTTAAAGCTCTCATCCTCTAGTACCTACATCAATGAACTTCTGTTGATA

ATTGTAGGTAGATTCAATATTTTTGCAACAACCGTGGCCATAATAATCTCTTATGCCTTC

ATACTGTATAATATTCTTTGCATACCCTCAACTGAGGGCAAATCCAAAGCCTTTAGTACC

TGTGGCTTTCATCTTACAGCTGTTGGGATTATATATATAATTTTTATTGTGCTTTAAGTG

AAAGTTTACAAATCAAGTCAGTCTCTCACACAAAAACCCATATACACCTTGCTACACACT

>LoafORs1.3P

ATGGAAATAAATGACATCTCATGGGAAGACTTCATTTTAGCAGGCTTCTCAGAATATCTG

AAGGCTGAGTTCATCTTTTCTCCATTTGTCTCTGGCTTCTACACCATGACACTGGCAGGC

AACATGGCTGTGATCTTGGTCTCCCTCCTGGACAGCTGACTCCATACCCCCATGTATTTC

TTCCTCTGAAACCTGTCATTTCTGGACATCTCTTTCACCACCTGCATTGTTCCTCAGATG

CTGGTGAACTTCTGG

>LoafORs1.4P

TGTCATCTGGCCCTTGCTACTTCCTGGCTGTCTGGGTTTGCCAACTCTCTCCTTCAGTCA

TCACTGGCCATTGTTTTGCCTCTGTGAGGCCACCACCATTTCCTTTGTGAGGTCCTGGTC

ATTGTCAAGCTGTCTTCTGTGAACACTGGTCCAACTAAATCAAAAATGTTAATTGTACAC

CTGTTCATTCTTGCCATTCCAGTCTGCGTCATCCTTACCTCCTATGCCTGCATTGCTAGG

ACCATGGTGAGGGTGCACTCTGCTGAAGGATGACAGAAGGCCTTTGGGACATGCACCTCC

CATTTAACAGTGGCCTTGCTGTTCTATGGAACCATCATGTTCATGTACCTTCAGCCGAAG

AATAACTACTCTTAGAATCACGGAAAGATCCTGGTTCTTGTTTATACCATTGTTGCCCCC

ACCATGAATCCACTAATCTATTCCCTGAGGAACAAAGATGTAAAAAGGGCAATGAGGAAA

GTGATCTGGAAGGATTTGGTT

>LoafORs1.5

ATGGAAAGGACAAACTGGACAACTGAGGTTGAGTTCATTCTGCAGGGACTTTCTGAGTAC

CCAAAAGCTGAAAAACTGCTTTTTGTGATGTGCTTGTTGATGTACCTGGTAATCCTCCTG

GGGAACAGTACCTTGATCATCTTAATGCTCCTGGATTTCCATCTCCACACACCCATGTAT

TTCTTCCTTGGTAATCTTTCCCTCCTAGACATCTGGTACACAACCTCTTTTATCCCCTCA

ATGCTAATACACTTCTTATCAGAGAAAAAAAACATTTCCTTCACTAGATGTGTTGTTCAA

ATGTCTGTCTCATACACTATGGGGTCCACAGAGTGTGTGCTCCTAGCAGTGATGGCATAT

GACCGCTACGTGGCCATTTGCAACCCTCTCAGATACTCCATCATCATGAACAAGGTACTT

TGTATTCAGATGGCAGCTGTCTCCTGGGGATTAGGCTTTCTCAACTCACTGGTAGAAACT

GTTCTTGCAATACGGCTGCCCTTCTGTGGAAAAAATGTCATTAATCATTTTGTTTGTGAA

ATACTGGCCTTCGTCAAACTGGCTTGCACAGATATTTCCTTGAATGAGATTACTATAATG

TTGGGCAATGTAATATTTTTGTTTTCTCCCTTACTGCTGATTTGTATATCCTACATTTTC

ATCCTCTCTACTATACTGAGAATCAATTCAGCTGAAGGAAGAAAAAAGGCTTTTTCCACC

TGCTCAGCCCACATGACGGTGGTGATTGTATTTTATGGGACAATCCTCTTCATGTATATG

AAGCCAAAGTCCAAAGACTCCACTTTTGACAAGTTGGTTGCTCTGTTCTATGGTATAGTC

ACCCCCATGTTCAATCCTATCATCTATAGCCTGAGGAACAAGGAGGTTCATGGAGCTATG

AAAAAACTGATGAGTAGACATTGGTTCAAGAGGAAACAGTGA

>LoafORs1.6P

TATGATGGTGTATGACCGATATGTAGCCATTTGCAACCTCCTAAAATATCCCCCATCATC

AAGAACAGTAGGGTTTGTGCACATATTGCCGCTGGCTTCTGGGTGACAGGCTGCCTTTCC

ACCCTGGCAGAAACAATGTCTGTGCTACAGTTGCCTCTCTGTGGTAATAACATCATCAAT

CACTTCACTTGCGAAATTCCGGCTGTCTTGAAACTGATTTGTGTAGATACCTCCATGGTA

GAATTTCTTATGCTGGTGATTAGCGTTCTTCTGATTCCTATGTCAGTGCTCCTCATTTGT

GACTCTTATGCCTTAATTCTCTCCAACATCCTGAGAATCAGCTCAGTGGATGGATGAAGC

AAAACCTTTTCAACATGTGCAGCCCACCTGACTGTGATGGTTTTGTTATATGGGACAGCT

CTCTCCATGTACCGGAAGCCCTCAGCTGTAGAGTCACAGGAAATAGATAAATGTGTGACT

TTA

>LoafORs1.7

ATGGACAGAGAAAACCAGACTAGAGTCACAGAATTCCTTCTCCTGGGATTCTCTGGGGAG

CCAGAGCAGGAAAAGATCCTCTTTGGGATGTTCATGTGGATGTACCTGGTTACTATCACT

GGGAACTTTCTCATCACCTTGGCCATCACCTGTGACAGTCATCTCCATAAGCCCATGTAC

TTCTTTTTAGCTAATCTGTCCTGTGTCGACATCTGCTTTTCATCAGTCACAACCCCCAAG

ATGCTAGTGAATCACATGTTGGGAAATGAGTCTATCTCTTATGTGGAATGTATGATCCAG

ATCTACTTCTTCATCACTTTCATCAATATGGATGGTTTCCTTCTGAGCGTGATGGCCTAT

GACCGTTATGTTGCCATCTGTTCCCCACTCCACTACAGCATGATCATGAGGCCCAAACTC

TGTGTCCTTCTGGTGGCCGTATCATGGATCATTACAAATATGCATGCTCTCTTACACACA

CTTCTCATGGTCCAACTCATGTTTTGCTCCAATAATGCTGTACACCACTTTTTCTGTGAC

CCCTACGCCATTCTAAAGCTTTCTTGTTCGGATACTTTTATCAATGAGTTGATGATATCC

ACTGCAGGTGGACTGATGTCTATTACCCCATTTACATGTATTACTGTTTCATATGCGTAC

ATATTCTCTAATGTATTGAAATTTCCATCTATTCAAGCAATAAGAAAAGCCCTATCCACA

TGTGGATCCCACCTCACTGTTGTCTCCCTCTTCTATGGTGCAATTCTGGGGGTCTATATG

CACCCTTCATCCTCCTACTCAGTACAGGACACAGTGGCCACAGTCATTTTCACAGTGGTG

ACACCCTTGGTTAATCCCTTCATCTACAGCCTGAGGAATTATGATATGAAGGGATCCCTA

AGAAAACTAATTATCAGGAGATTAGTTTCACCAAGAATTAGAAAATTTTAG

>LoafORs1.8

ATGGAGACCTGGTCGAACCGATCATCCACAGACGACTTTGTCCTCTTGGGCATCTTTTCC

CACAGTCCAACTGATCTTGTTCTTTTCTCTGCACTCATGGTGGTCTTCACAGTGGCCCTC

TGTGGGAATGTTCTCCTCATCCTCCTCATCATTATAGATCCTCGACTTCACACACCCATG

TACTTCTTCCTCAGCCAGCTTTCCATCATGGACCTCATGCTGGTCTGTACTAATGTGCCA

AAGATGGCAGTCAACTTCCTGTCTGGCAGGAAGTCTATCTCCTTTGTGGGTTGTGGCGTA

CAAATTGGCCTCTTTGTTTCTCTTGTGGGCTCTGAGGGGCTCTTGCTGGGACTCATGGCT

TATGACCGTTATGTGGCCGTTAGCTACCCACTCCACTATCCCATCCTCATGAGTCAGAGA

ATCTGTCTTCAGATTGTTGGAGGATCGTGGGTGTTTGGGATCATAGATGGTTTGATTCAG

ATGGTGATAGTAATGACCTTCCCCTACTGTGGCTTGAGGGATGTGAACCACTTCTTCTGT

GAGATGTTATCTGTATTGAAGCTGGCCTGTATAGACACATCCCTTTTTGAGAACGTAATA

TTTGCTTGCTGTGTCTTCATGCTCTTCCTCCCCTTCTCCATCATCGTGGCCTCCTATGCT

CGTATCCTGGGGGCTGTACTCCATATGTGTTCTACTCAGGCTCGTAAAAAGGCTCTGGCC

ACGTGCTCCTCCCACTTGACAGCTGTCTCCCTCTTCTATGGAGCGACCATGTTCATCTAC

CTGAGGCCTAAGCACTACAGGGCCCCTAGCCATGACAAGGTGGTCTCTGTCTTCTATACA

GTCCTTACTCCTATGCTCAACCCCCTCATTTATAGCTTGAGGAACCGGGAGGTGATGGGG

GCACTGAGAAAGGGGCTGGATCGTTGTAGAATCAGCATCCAGAACTGA

>LoafORs1.9

ATGGAGACCTGGTCGAACCGATCATCCACAGACGACTTTGTCCTCTTGGGCATCTTTTCC

CACAGTCCAACTGATCTTGTTCTTTTCTCTGCAGTCATGGTGGTCTTCACAGTGGCCCTC

TGTGGGAATGTTCTTCTCATCCTACTCATCTATATAGATCCTCGACTTCACACACCCATG

TACTTCTTCCTCAGCCAGCTTTCCATCATGGACCTCATGCTGGTCTGTATTAATGTGCCA

AAGATGGCAGTCAACTTCCTGTCTGGCAGGAAGTCTATCTCCTTTGTGGGTTGTGGCATA

CAAACTGGCCTCTTTGTTTCTCTTGTGGGCTCTGAGGGGCTCTTGCTGGGACTCATGGCT

TATGACCGTTATGTGGCCATTAGCTACCCACTCCACTATCCCATCTTCATGAGTCAAAGA

ATCTGTCTTCAGATTGTTGGAGGATCGTGGGTGTTTGGGATCATAGATGGTTTGATTCAG

ATGGTGATAGTAATGACCTTCCCCTACTGTGGCTTGAGGGATGTGAACCACTTCTTCTGT

GAGATGTTATCTGTATTGAAACTGGCCTGTGTAGACACATCCCTTTTTGAGAACCTAGTA

TTTGCTTGCTGTGTCTTCATGCTCTTCCTCCCCTTCTCCATCATCGTGGCCTCCTATGCT

CGTATCCTGGGGACTGTACTCCATATGTGTTCTACTCAGGCTCGTAAAAAGGCTCTGGCC

ACTTGTTTTTCCCACCTGACATCTGTCTCCCTCTTCTATGGGGCAGCCATGTTCATTTAC

CTGAGGCCTAAGCACTACAGGGCCCCTAGCCATGACAAGATGGTCTCTGTCTTCTATACA

GTCCTTACTCCTATGCTCAACCCCCTCATTTATAGCTTGAGGAACCGAGAGGTGATGGGG

GCACTGAGGGAGAGGCTGGGTCGTTGTAGGATCAGCATCCAGCAGGGCATCCTACACCTG

GCTCTGCCACCTCCTAGCTCTGTGTCACTGGATAAATAA

>LoafORs1.10P

CCTCATCTACATAGATCCTTGACTTCATACACCCATGTACTTCTTCCTTAGCTTTCCCTC

ATGGACCTCATGTTGGTATGTAACATTGTGCCAAAGATGGCAGTCAACTTCCTGTCTGGC

AGAAAGTCCATCTCCTTTGTGGGTTGTGGTATACAAATTGGCCTTTTTGTCTCTCTTGTG

GGCTCTGAGGGGCTCTTACTGGGACTCATGGCTTACGACCGCTATGTGGCCATTAGCCAC

CCACTTCACTATCCCATCCTCATAAGTCAGAGGGTCTGTCTTCAGATTGCTGGAGGATCC

TGGGCCTTTGGCATACTAGATGGAATGATCCAGATTGTGGCAACCATGACGTTCCCCTAC

TGTGGCTCCAGGAATGTGGACCACTTCTTCTGTGAGGTGCCAGCTTTATTGAACCTGGCC

TGTGCAGACCCATCCCTTTTCGAGAACCTGCTATTTGCTTGCTATTTTTTCATGGTTCTT

CTTCCCTTCTCCATCATCATGGCCTCCTATTCTCACATTCTGGCTGCTGTGCCCCATATG

CACTCTGCTCAGACCCGTAAAGAGGCTCTGGCAACCTGTTCCTCCCACCTGACAGCTGTC

TCCCTTTTCTATGGGCCCGCCATGTTCATCTACTTGAGGCTTAAGCGCTACAGAACCCCT

AGCCATGACAAGGTGGTCTCTGTCTTCTACACAGTTCTTACTCCTATTCTCAACCCCCTC

ATTTATAGCTTGAGGAATGGGGAAGTGGTGGGGGTACTGAGGAAGGAGCTTGACTGTTGT

AGGATTGTCAGCCAGCAC

>LoafORs1.11

ATGGTCTGGGTGGGAAACCAGACTCTCATTCCCCACTTCATCCTCCTTGGCCTCTTCACT

CACTCCCCGCTGCACTTCTTCTTCTTCTCCATCATCATGGTCATGTTTCTGGTGGCCCTG

TCTGCCAATGGGCTCATGATCTTCCTCATCCACGTTGACTCCCGCCTCCACAGCCCCATG

TACTTCTTCCTCAGCTGGCTGTCCCTCATGGATCTCATGCTCATCTCCACCATTGTGCCA

TGGATGGCTGTGGATTTCCTCCTGGGTGGTGGCGCCATCTCCTTCACAGGCTGTGGGCTC

CAGATCCTCTTCTTCCTCACCCTCCTGGGGGATGAGTGCTTCCTGCTGGCCTTCATGGCC

TACGATCGCTACGTGGCCATCAGCAACCCACTGAGGTACTCGATGGTCATGAGCCGTCGT

GTCTGCTGGATCATGGTAGCAGGCTCCTGGCTTTTTGGACTGGTAGACGGGCTGATCCAG

GCTGTCTTCACCCTCCGCTTCCCTTACTGCAGCTCCCAGGAGATCGACCACTTCTTCTGC

GATGTTCCCACTGTGCTCAAGCTGGCCTGCACTAATACTTCCCTTTATGAGACCATGATC

TATGTCTGCTGCATCCTCATGCTTCTCCTACCGTTCTCTGTCATCTCTACCTCCTACCTG

CGGATCCTGGTGGCTGTGCTCTGCATGCGCTCTGCCGAAGGCCGGCAGAAGGCCTTTGCT

ACCTGCTCCTCCCACATGGCAGTGGTCTCCCTCTTCTACGGGGCTGCCATGATCACCTAC

ATGCGACCCCAGGCTTACCACTCCTCGAAGCAGGACAAGGTGGTCTCCGCCTTCTATACC

ATGATCACCCCCATGCTCAACCCTCTCATATACAGTCTGAGGAACAAGGAAGTAACTGGG

GCTCTGAGGAAACTCCTGGGAAGGTGTTCCTTTGGGGAAGGACAGGGCTAG

>LoafORs1.12

ATGGACACCTGGTTGAATCAATCATACACAGATGACTTTGTCCTCTTGGGCATCTTTTCA

TACTGTGCAACTGATCTTGTTCTTTTCTCTATGGTCATGATGGTCTTCACAGTGGCCCTC

TGTGGGAATGTCCTACTCATCTCCCTCATCTACATAGATCCTCGACTTCATACACCCATG

TACTTCTTCCTTAGTCAGCTTTCCCTCATGGACCTCATGTTGGTATGTAACATTGTGCCA

AAGATGGCAGTCAACTTCCTGTCTGGCAGAAAGTCCATCTCCTTTGTGGGTTGTGGTATA

CAAATTGGCCTTTTTGTCTCTCTTGTGGGCTCTGAGGGGCTCTTACTGGGACTCATGGCT

TACGATCGCTATGTGGCCATTAGCCACCCACTTCACTATCCCATCCTCATGAGCCAGAGG

GTCTGTCTCCAGATTGCTGGAGGATCCTGGGCCTTTGGCATACTAGATGGAATGATCCAG

ATGGTGGCAGCCATGACCTTCCCCTACTGTGGCTCCAGGAATGTGGACCACTTCTTCTGT

GAGGTGCCAGCCTTATTGAAGCTGGCCTGTGCAGATACATCCCTTTTTGAGAACCTGCTA

TTTGGTTGCTGTGTCTTCATGCTCCTCCTTCCCTTCTCCATCATCATGGCCTCCTATGCT

TGCATTCTGGCTGCTGTGCTCTGTATGAACTCTGCTCAGGCCCGTAAGAAGGCTCTGGCG

ACCTGTTCCTCCCATCTGACAGCTGTCTCCCTCTTCTATGGGGCTGCCATGTTCATCTAC

TTGAGGCCTAAGCACTACGGGACCCCTAGCCATGACAAAGTGGTCTCTGTCTTCTACACC

GTTCTTACTCCTATGCTCAACCCCCTCATTTATAGCTTGAGGAATGGGGAAGTGATGGGG

GCACTGAGGAAGGGGCTAGACCGTTGTAGGATTGTCAGCTAG

>LoafORs1.13

ATGGTCTGGATGGGAAACCAGACTCTCATTCCCCATTTCATCCTCCTTGGCCTCTTCACC

CACTCCCCACTGCACCTCTTCTTCTTCTCCATCATCATGGTCATGTTTCTGGTGGCCCTG

TCTGGCAATGGGCTCATGATCCTCCTCATCAGCGTCGACTCCCACCTCCACAGCCCCATG

TACTTCTTCCTCAGCTGGTTGTCGCTCATGGATCTCATGCTCATCTCCACCATTGTGCCA

CGGATGGCTGTGGATTTCCTCCTGGGTGGTGGCGCCATCTCCTTCACAGGCTGTGGGCTC

CAGATCCTCTTCTTCCTCACCCTCCTGGGGGATGAGTGCTTCCTGCTGGCCTTCATGGCC

TACGACCGCTACGTGGCCATCAGCAACCCACTGAGGTACTCGGTGGTCATGAGCCGTCGT

ATCTGCTGGATCATGGTGGCAGGGTCCTGGCTTTTTGGATTGGTGGACGGGCTGATCCAG

GCTGTCTTCACCCTCCGCTTCCCCTACTGCAGTTCCCAGGAGATTGACCACTTTTTCTGC

GAGGTTCCTGCTGTGCTCAAGCTGGCCTGTGCTGATACCTCCCTTTATGAGACCATGATC

TACGTCTGCTGCATCCTCATGCTGCTCCTACCCTTCTCTGTCATCTCTGCCTCCTACCTG

CGGATCCTGGTGGCTGTGCTCTGCATGCGCTCTGCCGAAGGCCGGAAGAAGGCCTTTGCT

ACCTGCTCCTCCCACATGGCAGTGGTCTCCCTCTTCTACGGGGCTGCCATGATCACCTAC

ATGCGACCCCAGGCTTACCACTCCTCGAAGCAGGACAAAGTGGTCTCTGCCTTCTATACC

ATGATCACCCCCATGCTCAACCCTCTCATATACAGTCTGAGGAACAAGGAAGTAACTGGG

GCTCTGAGGAAACTCCTGGGAAGGTGTCCCTGTGGGGAGGGACAGGGCTAG

>LoafORs1.14

ATGGACACCTGGTTGAATCAATCATACACAGATGACTTTGTCCTCTTGGGCATCTTTTCA

TACTGTGCAACTGATCTTGTTCTTTTCTCTATGGTCATGATGGTCTTCACAGTGGCCCTC

TGTGGGAATGTCCTACTCATCTCCCTCATCTACATAAATCCTCGACTTCATACACCCATG

TACTTCTTCCTTAGTCAGCTTTCCCTCATGGACCTCATGTTGGTATGTAACATTGTACCA

AAGATGGCAGTCAACTTCCTGTCTGGCAGAAAGTCCATCTCCTTTGTGGGTTGTGGTATA

CAAATCGGCCTTTTTGTCTCTCTCGTGGGCTCTGAGGGGCTCTTACTGGGACTCATGGCT

TACGACCGCTATGTGGCCATTAGCCACCCACTTCACTATCCCATCCTCATGAGCCATAGG

GTCTGTCTTCAGATTGCTGGAGGATCTTGGGCCTTTGGCATACTAGATGGAATGATCCAG

ATGGTGGCAGCCATGACCTTCCCCTACTGTGGCTCCAGGAATGTGGACCACTTCTTCTGT

GAGGTGCCAGCTTTATTGAAGCTGGCCTGTGCAGACACATCCCTTTTTGAGAACCTGCTA

TTTTCTTGCTGTGTCTTCATGCTCCTCGTTCCCTTCTCCATCATCATGGCCTCCTATGCT

CATATTCTGGCTGCTGTGCTCCGTATGAACTCTGCTGAGTCCCGTAAAAGGGCTCTGGCC

ACCTGTTCCTCCCACCTGACAGCAGTATCCCTCTTCTATGGGGCAGCCATGTTCATCTAC

TTGAGGATTAAGCACTACGGGACCCCTAGCCATGACAAAGTGGTCTCTATCTTCTACACA

GTTCTTACTCCTATGCTCAACCCCCTTATTTATAGCTTGAGGAATGGGGAAGCCATGGGG

GCACTGAGGAAGGGGTTAGACCGTTGTAGGATTGTCAGCCAGCATTGA

>LoafORs1.15

ATGGTCTCGGTGGGAAAGCAGACTCTCATTCCCCATTTCATCCTCCTTGGCCTCTTCACC

CACTCCCCACTGCACCTCTTCTTCTTCTCCATCATCATGGTCATGTTTCTGGTGGCCCTG

TCTGCCACTGAGCTCATGATCCTCCTCATCAACGTTGACTCCCACCTCCACAGCCCCATG

TACTTCTTCCTCAGCTGGCTGTCCCTCATGGATCTCATGCTCCTCTCCACCATTGTGCCA

CGGATAGCTATGGATTTCCTCCTGAGTGGTGGCACCATCTCCTTCACAGACTGTGGGCTC

CAGATCCTCTTCTTCCTCACCCTCCTGGGGGATGAGTGCTTCCTGCTGGCCTTCATGGCC

TACGACCGCTACGTGGCCATCAGCAACCCACTGAGGTACTCGGTGGTCATGAGCCGTCGT

GTCTGCTGGATCATGGTAGCAGGGTCCTGGCTTTTTGGACTGGTAGACGGGCTGATCCAG

GCTGTCTTCACCCTTCGCTTCCCCTACTGCAGCTCCCAGGAGATCGACCACTTCTTCTGC

GAGGTTCCCGCTGTGTTCAGGCTGGCCTGTGCTGATACCTCCCTTTATGAGACCATGAAC

TATGTCTGCTGCATCCTCACGCTGCTCCTACCCTTCTCTGTCATCTCTGCCTCCTACCTG

CGGATCCTGGTGGCTGTGCTCTGCATGCGCTCTGCCGAAGGCCGGCAGAAGGCCTTTGCT

ACCTGCTCCTCCCACATGGCAGTGGTTTCCCTCTTCTACGGGGCTGCCATGATCACCTAC

ATGGGGCCCCAGACTTACCACTCCTCAAAGCAGGACAAAGTGGTCTCCGCCTTCTATACC

ATGATCACTCCCATGTTCAACCCTCTTATATACAGTCTGAGGAACAAGGAAGTAACTGGG

GCTCTGAGGAAACTCTTGAGAAGGTGTCCCTTTTAG

>LoafORs1.16P

ATGGACACCTGGTTGAATCAATCATACACAGATGACTTTGTCCTCTTGGGCATCTTTTCG

TACTGTGCAACTGATCTTGTTCTTTTCTCTATGGTCATGATGGTCTTCACAGTGGCCCTC

TGTGGGAATGTCCTACTCATCTCCCTCATCTACATAAATCCTCGACTTCATACACCCATG

TACTTCTTCCTTAGTCAGCTTTCCCTCATGGACATCATGTTGGTATGCAACATTGTGCCA

AAGATGGCAGTCAACTTCCAGTCTGGCAGAAAGTCCATCTCCTTTGTGGGTTGTGGTATA

CAAATTGGTCTTTTTGTCTCTCTTGTGGGCTCTGAGGGGCTCTTACTGGGACTCATGGCT

TAAGACCACTATGTAGCCATTAGCCACCCACTTCACTATGCCATCCTCATGAGTCAGAGG

GTCTGTCTTCAGATTGCTGGAGGATCCTGGGCCTTTGGCATACTAGATGGAATGATCCAG

ATGGTGGCAGCCATGACCTTCCCCTACTGTGGCTCCAGGAATGTGGACCACTTCTTCTGC

GAGGTGCCAGCTTTTTTGAAGCTGGCCTGTGCAGACACATCCCGTTTTGAGAACCTGCTA

TTTGCTTGCTGTGTCTTCATGCTCCTCCTTCCCTTCTGCATCATCATGGCCTCCTATGCT

CATATTCTGGCTGCTGTGCTCCGTATGAACTCTGCTGAGACCCGTAAAGAGGCTCTGGTG

ACCTGTTCCTCCCACCTGACAGCAGTATCCCTCTTCTACGGGGCTGCCATGTTCATCTAC

TTAAGGATTAAGCGCTACGGTACCCCTAGCCATGACAAAGTGGTCTCTGTCTTCTACACA

GTTCTTCCTCCTATGCTCAAGCCCCTTACTTATAGCTTGAGGAATGGGGAAGCGATGGGG

GCACTTGAAAGGGGC

>LoafORs1.17

ATGGTCTGGATGGGAAACCAGACTCTCATTCCCCACTTCATCCTCCTTGGCCTCTTCACC

CACTCCCCGCTGCACTTCTTCTTCTTCTCCATCATCATGGTCATGTTCCTGGTGGCCCTG

TCTGCCAATGGGCTCATGATCCTCCTCATCAATTTTGACTCCCGCCTCCACAGCCCCATG

TACTTCTTCCTCAGCTGGCTGTCCCTCATGGATCTCATGCTCATCTCCACCATTGTGCCA

CGGATGGCTGTGGATTTCCTCCTGGGTGGTGGCGCCATCTCCTTCACAGGCTGTGGGCTC

CAGATCCTCTTCTTCCTCACCCTCCTGGGGGATGAGTGCTTCCTGCTGGCCTTCATGGCC

TACGACCGCTACGTGGCCATCAGCAACCCACTGAGGTACTCGGTGGTCATGAGCCGTCGT

GTCTGCTGGATCATGGTGGCGGGGTCCTGGCTTTTTGGACTGGTGGACGGGCTGATCCAG

GCTGTCTTCACCCTCCGCTTCCCCTACTGCAGCTCCCAGGAGATCGACCACTTCTTCTGC

GATGTTCCCACTGTGCTCAAGCTGGCCTGTACTGATACTTCCCTTTATGAGACCATGAAC

TATGTCTGCTGCATGCTCATGCTGCTCCTACCCTTCTCTGTCATCTCTGCCTCCTACCTG

TGGATCCTGGTGGCTGTGCTCTGCATGCACTCCACTGAAGGTCGGCAGAAGGCCTTTGCT

ACCTGCTCCTCCCACATGGCAGTGGTCTCCCTCTTCTATGGGGCTGCAATGATCACCTAC

ATGCGACCCCAGGCTTACCACTCCTCAAAGCAGGACAAGGTGGTCTCCGCCTTCTATACC

ATGATCACCCCCATGCTCAACCCTCTCATATACAGTCTGAGGAACAAGGAAGTAACTGGG

GCTCTGAGGAAACTCCTGGGAAGGTGTCCCTGTGGGAGGGAGACAGGGCTAGGTTGGCAC

CAGCAGATATGGGATTCTTGA

>LoafORs1.18

ATGCTAAACCTTCCCACAACAACAGCCCAGGATGATATTTTTGTTTGTTTGTTTCTCAGG

GTCACTACCGTGGAGCTCTGGAACCACACCACCATAATGAACTTCCTCCTTTCAGGCCTG

TTCAGCCACACACCATATGGCTTCTTCCTCTTTTCCCTGGTCCTTCTGGCCTCCATGGCC

GCACTGGCTGGCAACATCCTCCTCCTCTTCCTCATCCAGGCCAATGTGCACCTGCACATC

CCTATGTACTTTTTCCTGAGTCAGCTCTCCATCATGGACCTGACCATGATGTGCTCTGTG

GTGCCTAAGATGGCAGCCAACTTTCTTTCAGGCAGTAAGATTATCTCTCAGGGAGCCTGT

GGGGCTCAGATCTTCCTAGTGGTTATGGTAGGAGGAGCTGAGTGCTTTCTCCTGGCAGTC

ATGGCTTATGACCGGTATGTGGCGGTCTGCCATCCCCTGAGGTACTCTGTGCTCATGAAC

TGGAAGGTCTGCTCCCTCATGACCAAGGCTTCTTGGATGGGTGGGGTGGCGGACAGTGTG

ATAAACGTGAGCATGGTCTTCAGCTTCCTCTACTGCAGCTCTCGAGAGGTAGATCACTTC

TTCTGTGAAGTCCCTGCCCTGCTGCGCATCTCTTGTGCTGACACATTGCTCTTTGAGGAC

TTCATCTATGCTTGCTGTATAGTCATGCTGCTGCTGCCCATTGGGGTCATTGTGGCTTCT

TATGCTCAAGTTCTCACAGCTGTGATCAGGATGCCTTCCACTGAGGGGAAACAGAAGGCT

GTAACTACTTGCTCCTCCCACTTGGTTGTGGTGGGCCTCTACTATGGGGGAGCCATATTT

AGCTATATGCATCGGGCCTCCTCTAAGACACCGACTAGATACCGAGCCACCTCCATCTTT

TATACCGTCCTCACCCCAATGCTCAACCCACTTATTTATAGCCTGAAGAACAAGGAGGTA

ACGAGGGCCCTGAAGAAGATGCTGGGGAGATGGGGCGTGTAG

>LoafORs1.19P

CTGGTCTCCCGTCTGGACCTACAGCTCCATACAACCATGTATTTCTTCCTTACTCACCTT

TCCTTTATTGACCTGACACATGTGACCTGCATCAGTCCTCAGATGCTCGTCAACTTCAGG

GGGCCAGATAAGTCCATAGGTTTTGTTGGATGTGCGATTCAGCTTCTCATCACCCTGGGT

CTGGAGGGCACTGAGTGCGTCCTTCTGGCCATGATGGCATATGATTGTTACATTGCTGTC

TGTCAGCGCTTGCATTATTTTACCCTTATGCCAACATAGCTGTCCTGGACATTGGCCAGC

ATATCCTGGTTTATTGGTTTCAGTAACTCATTGGTCCACACCATTATCACAGTGACCCTT

CCCCAATGTGGCCACCACCTGATAAACCGCTTGTACTGTGAGACACCCCTAGTGGTGCAG

TTTGCTTGTGTGGACACCAAAAATTACAGAAAGGAGATCATGGTGCTCAGGAGTATATTC

TTTGTCTTTCCTCTCGCACCTATCTTGCTCTCTTATGAGTACATTGCCCATAGTGTGTTG

AGGATGAAAACACCTAGAGGGTAAAAGAAGGTCCTTGGAACCTGTGGCTCCCATCTCACA

AAGGTGTCCATCTTCTACAGTACTCTC

>LoafORs1.20P

ATGGGAAGATTCAACACTAGTTACCGAGATGGCTTCATTTTGGTGGGCTTCTCAGATTGG

CCTCAACTGGAACTTGCCCTTTTTGTCTTTATTTCAATTTTCTACTCTCTAACTCTCTTT

GGCAATACTACCATCATAGCTCTTTCCTGCCTGGATCATCGGTTGCACACACCCATGTAC

TTTTTCCTCTGCCATCTCTCCTTCCTTGACCTCTGCTACACTACCAACATTGTTCCTCAG

CTTCTGATCAACCTTCATGGATCTGACCAGACCATCACCTATGGAGGGTGTATGGCCCAG

CTCTTTATCTTCCTTGCTGTGGGCTCCACTGAATCTGTACTCCTGGTGGTAATGGCCTTT

GACCGCTATGCTGCTGTCTGTCGACCGCTCCACTACACGACCATTATGCACCCCTCTTTC

TGCCAGACACTGGCTCTCATCTCCTGGGCAGGAGGGTTCATGAACTCTGTGGTTCAGACA

GGCCTCATGATGGCCATGCCGCTCTGTGGCCCCCATCACCTGAACCACTTCTTCTGTGAG

ATGCCTGTGCTACTGAAGCTGGCTTGTGAGGACCCACATGGCACAGAGGTCAAGATGTTT

GTGGCCAGAGTCATCATTGTGGTGTTTCCTGCAGCACTAATTCTAGGCTCTTACGTACAC

ATTGCTCAGGCAATGCTGAGGGTCAGATCAATTGCTGGACACAGAAAGGCTTTTGGGACT

TGTGGGTCCCACCTCTTGGTTGTTTCCCTTTTTTATGGCTCAGCCATGTACACATACCTC

CAACCCACACATAGTTATTCTCAGAGTGAGGGAAGTTTGTTGCCCTTTTTTATACTATAA

TTACCCCCATGCTTA

>LoafORs1.21

ATGGAAATAAATGACAGCTCATGGGAAGACTTCATTTTAGTAGGCTTCTCAGAATATCCA

AAGGCTGAGTTCATCATTTCTCTGTTTGTCACTGGTTTCTACACGATGACACTGGCGGGC

AACATGGCTATCATCTTGGTCTCCATCCTGGACAGCCAACTCCACACCCCCATGTATTTC

TTCCTCCGAAACCTATCATTTTTGGACATCTCTTTCACCACCTGCATTGTCCCTCAGATG

CTGGTGAACATCTGGAGTGGTCATAAGACGATCAGCTATGTAGGTTGCATAGTTCAATAT

TCAGTGGCCTTGGCTCTTGGCTCCATAGAATGTGTGCTTCTTGCTGTCATGGCTGTTGAC

CGCTATGTTGCTGTCATCTGGCCCTTGCGCTATGCTACAGTCATGCACCAACGCATTTGC

CACCTTCTGGCGGCCACTTCCTGGCTCTCTGGGTTTGCCAATTCTCTTTTTCAGTCATCA

CTGGCCATCATTTTGCCTCTGTGTGGCCACCACCATGTGGACCATTTCTTCTGTGAGGTC

TTGGTCATCGTCAATCTGTCTTGTGTGGACACTGGTCCAACTGAATCAAAAATGTTAATT

GCACGCCTGCTTATTACTGTCATTCCAGTCTACATTATCCTCACCTCCTATGCCTGCATT

GCTGGGACTGTGGTGAGGATTCCCTCTGCTGAAGGACGACAGAAGGCCTTTGGGACATGT

GCCTCCCATTTAATGGTGGTCTTGCTGTTCTATGGAACCGTCATGTTCATGTATCTTCAG

CCTAAGAATAACTACTCTCAGAATCAGGGAAAGATCCTGGCTCTTGTTTATACCATTGTT

GCCCCCACCATGAATCCACTAATCTATACCCTGAGGAACAAAGATGTAAAGAGGGCAATG

AGAAAAGTGATCTGGAAGGACTTAGTTTAA

>LoafORs1.22

ATGGGAGGGTTCAACACTAGTTACCGAGATGGCTTCATTTTGGTGGGCTTTTCAGATTGG

CCTCAACTGGAACTTGCCCTTTTCATCTTTATTTCAATTTTTTACCCCCTAACTCTCTTT

GGCAATATCACCATCATCACTCTATCCCGCCTGGATCTGCGGTTGCAAACACCCATGTAC

TTTTTCCTCTGTAATCTCTCCTTCCTGGACCTCTGCTTCACTACAAGCACTGTGCCCCAG

CTTCTGATCAACCTTCATGGATCTGACCAGACCATCACCTACGGAGGGTGTGTGGCCCAG

CTCTTTATCTTCCTCACCCTGGGCTCCATTGAGTGTGTGCTTCTGGTGGTGATGGCCTTT

GATCGCTATGCTGCTGTCTGTCGACCACTCCACTACACGACCATTATGCACCCCCGACTC

TGCCAGACACTGGCTGCCATCTCCTGGATGGGAGGCTTCATGAACTCTGGAGTTCAGACA

GGTCTCATGATGGCCATGCCGCTCTGTGGCCTCCATCACCTGAACCACTTCTTCTGTGAG

ATGCCTGTTCTCCTGAAGATGGCTTGTGAGGATATACTAGGTAAAGAGGTGAAGATGTTT

GTGGCCCGAGTAATTATTGTAATGCTTTCTGCAGCAGTAATTCTAGGCTCTTATGTACAC

ATTGCTCAGGCTGTGCTGAGAGTCAAATCAGTTGCTGGACGCAGAAAGGCTTTTGGGACT

TGTGGGTCACACCTCTTGGTAGTTTTCCTTTTCTATGGCTCAGCCATCTACACGTACTTC

CAACCCATGCATAGTTATTCTCCAAGTGAAGGAAAGTTTGTTGCACTTTTTTATACTATA

ATTACCCCCATGCTCAATCCTCTCTTTTATACCCTAAGGAATAAGGATGTGAAGGGGGCT

CTGAAGAAGATAGTACGGAAAGGCAGAGACTCGGCGTAG

>LoafORs1.23

ATGGAAATAAATGACAGCTCATGGGAAGACTTCATTTTAGTAGGCTTCTCAGAATATCCA

AAGGCTGAGTTCATCATTTCTCTGTTTGTCACTGGTTTCTACACGATGACACTGGCGGGC

AACATGGCTATCATCTTGGTCTCCATCCTGGACAGCCAACTCCACACCCCCATGTATTTC

TTCCTCCGAAACCTATCATTTTTGGACATCTCTTTCACCACCTGCATTGTCCCTCAGATG

CTGGTGAACATCTGGAGTGGTCATAAGACGATCAGCTATGTAGGTTGCATAGTTCAATAT

TCAGTGGCCTTGGCTCTTGGCTCCATAGAATGTGTGCTTCTTGCTGTCATGGCTGTTGAC

CGCTATGTTGCTGTCATCTGGCCCTTGCGCTATGCTACAATCATGCACCAACAGATTTGC

CACCTTCTGGCAGCCACTTCCTGGCTATCTGGGTTTGCCAACTCTCTTTTTCAGTCATCA

CTAGCCATCATTTTGCCTCTGTGTGGCCACCACCATGTGGACCATTTCTTTTGTGAGGTC

TTGGTCATTGTCAAGCTGTCTTGTGTGGACACTGGTTCAACTGAATCAAAAATGTTAATT

GCACGCCTGCTTATTATTGTTGTTCCAGTCTACATTATCCTCACCTCCTATGCCTGCATT

GCTGGGACTGTGGTGAGGATTCCCTCTGCTGAAGGACGACAGAAGGCCTTTGGAACATGT

GCCTCCCATTTAATGGTGGTCTTGCTGTTCTATGGAACCATCATGTTCATGTATCTTCAG

CCTAAGAATAACTACTCTCAGAATCAGGGAAAGATCCTGGCTCTTGTTTATACCATTGTT

GCCCCCACCATGAATCCACTAATCTATTCCCTGAGGAACAAAGATGTAAAGAGGGCAATG

AGAAAAGTGATCTGGAAGGATTTAGTTTAA

>LoafORs1.24

ATGGGAGGGTTCAACACTAGTTACCGAGATGGCTTCATTTTGGTGGGCTTTTCAGATTGG

CCTCAACTGGAACTTGCCCTTTTCATCTTTATTTCAATTTTTTACCCCCTAACTCTCTTT

GGCAATATCACCATCATCACTCTATCCCGCCTGGATCTGCGGTTGCAAACACCCATGTAC

TTTTTCCTCTGTAATCTCTCCTTCCTGGACCTCTGCTTCACTACCAGCACTGTGCCCCAG

CTTCTGATCAACCTTCATGGATCTGACCGGACCATCACCTACGGAGGGTGTGTGGCCCAG

CTCTTTATCTTCCTCGCCCTGGGCTCCACTGAGTGTGTGCTCCTGGTGGTGATGGCCTTT

GATCGCTATGCTGCTGTCTGTCGACCACTCCACTACACGACCATTATGCACCCCCGACTC

TGCCAGACACTGGCTGCCATCTCCTGGGTGGGAGGCTTCATGAACTCTGCAGTTCAGACA

GGTCTCATGATGGCCATGCCGCTCTGTGGCCTCCATCACCTGAACCACTTCTTCTGTGAG

ATGCCTGTTCTCCTGAAGATGGCTTGTGAGGATATACAAGGTACAGAGGTGAAGATGTTT

GTGGCCCGAGTAATTATTGTAATGCTTCCTGCAGCACTAATTCTAGGCTCTTATGTACAC

ATTGCTCAGGCTGTGCTGAGAGTCAAATCAGTTGCTGGACGCAGAAAGGCTTTTGGGACT

TGTGGGTCACACCTCTTGGTAGTTTTCCTTTTCTATGGCTCAGCCATCTACACGTACCTC

CAACCCATGCATAGTTATTCTCCAAGTGAAGGAAAGTTTGTTGCACTTTTTTATACTATA

ATTACCCCCATGCTCAATCCTCTCATTTATACCCTAAGGAATAAGGATGTGAAGGGGGCT

CTGAAGAAGATAGTACGGAAAGGCAGAGACTCAGTGTAG

>LoafORs1.25

ATGGAAATAAATGATAGCTCATGGGAAGACTTCATTTTAGTAGGCTTCTCAGAATATCCG

AAGGCTGAGTTCATCCTTTCTCTATTTGTCTCTGGCTTCTACACCATGACACTGGCAGGC

AACACGGCTATCATCTCGGTCTCCATCCTGGACTGCCGACTTCACACCCCCATGTATTTC

TTCCTCCGAAACCTATCATTTCTCGACATCTGTTTCACCACCTGCATTGTTCCTCAGATG

CTGGTGAACATCTGGAGTGGTCATAAGACGATCAGCTATGTAGGTTGCATAGTTCAATAT

TCAGTGGCCTTGGCTCTTGGCTCCATAGAATGTGTGCTTCTTGCTGTCATGGCTGTTGAC

CGCTTTGTTGCTGTCATCTGGCCCTTGCGCTATGCTAAAATCATGCACCAACGGATTTGC

CACCTTCTGGCAGCCACTTCCTGGCTATCTGGGTTTGCTAACTCTCTCCTTCAGTCATCA

CTGGTCATCATTTTGCCTCTGTGTGGCCACCACCACTTGGACCATTTCCTTTGTGAGGTC

CTGGTCATTGTCAAGCTGTCTTGTGTAGACACTAGTCCAGCTGAATCAAAAATGTTAATT

GTACGCCTGATCATCCTTGCCATTCCAGTCTGCATCATCCTTACCTCCTATGCCTGCATT

GCTGGGACCGTGGTGAGGATGCATTCTGCTGAAGGACGACAGAAGGCCTTTGGGACATGT

GCCTCCCATTTAATGGTGGTCTTGCTGTTCTATGGAACCATCATGTTCACATACCTTCAG

CCTAAGAATAACTACTCTCAGAATCAGGGAAAGATCCTGGCTCTTGTTTATACCATTGTT

GCCCCCACTATGAATCCACTAATCTATTCCCTGAGGAACAAAGATGTAAAGAGGGCAATG

AGAAAAGTGATCTGGAAGGATTTAGTTTAG

>LoafORs1.26

ATGGTAGGTGGGAATGAGTCCTCAATAACTGATTTCATCCTTGTGGGACTTTTTCCTGAG

TTTCAGCATTCCATTATCCTCAACTCCATGATCATCTTCATCTACATCCTTGCCTTCCTG

GGGAACATGCTTCTGATTGTCTTGATTTCGGGGGACTCTCAGCTTCATACACCCATGTAT

ATTCTCCTCAGTCAACTCTCTGTCATTGACTTGACGTTAACTTCCACCATTGTCCCGAAG

ATGGCCTATAACTTTTTCACGGGGGAAAAGACCATATCACGGATTGGCTGTGGGACCCAG

AGTTTCTTTTATCTGTTGATGGGAATGTCAGAATGCCTCATCTTGACCCTCATGGCTTAT

GATCGCTATGTAGCTGTCTGCAACCCATTGCATTATCCCACCATCATGGGCCCCACTTTC

TGTCTGCATATGGTTGCTACATGTTGGATTGGAGGCTCTATAAGTTCATTTATACATACA

GTCTACCCTATGCATTTCCCCATCTGTGGATCAAGGGAGATCCACCACTTCTTCTGTGAG

GTACCAGTCCTCATTAAACTCTCCTGTGAAGACACTTCAGTCTATCAGTTAGTGGTGGTG

GTGACAAGCATTGTGCTGCTTGTTGTGCCTTTCATTCTCATCATAGCTTCCTATACTCTC

ATCTTTCTCACTGTCCTCCGTATGAACTCTATCAAGGGCAGGAAAAAAGTCCTGGCCACA

TGCTCTTCCCATTTAACTGTGGTGAGTCTCTTCTTTGGCCCAAACATATTCATCTACATG

ACTTTCACGTCATCTCATAGTCCAGAACAGGACCAGGCTCTCTCTGTTTTCAGCAACATC

CTCACCCCCATGCTGAACCCCCTCATCTACAGCCTGAGGAACAAGGAAGTGGTGGCAGCT

CTCATCAAGCTGGTGGGGAGACCTGTGGTCCTTTAG

>LoafORs1.27

ATGGTGAGTGTGAATGAATCCTCAATAACTGATTTCATCCTTGTGGGACTTTTTCCTGAG

TTTCAGCATTCCATTATCCTCAACTCCGTGATTGTCTTCATCTATACCCTTGCCTTCCTG

GGGAACACGCTTCTGATTGTCTTGATTTTGGGGGACTCCCGGCTTCATACACCCATGTAC

TTTCTCCTCAGTCAACTCTCTGTCATTGATTTGACGTTAACTTCTACCATTGTCCCGAAG

ATGGCCTATAACTTTTTCACGGGTGAAAGGAGCATATCGTGGATCGGTTGTGGGACCCAG

AGTTTCTTTTTCCTCATGTTAGGAATGTCAGAGTGCCTCATCTTGACCCTCATGGCTTAT

GATCGTTATGTAGCTGTCTGTAGCCCACTGCGTTATCCCACTATCATGAGCCCCAGTTTC

TGTCTGCATATGGTTGCTACATGTTGGATTGGAGGCTCTATAAGTTCATTTATACATACA

GTCTACCCTATGCATTTCCCCATCTGTGGATCAAGGGAGATCCACCACTTCTTCTGTGAG

GTACCAGTCCTCATTAAACTCTCCTGTGAAGACACTTCGGTCTATCAGTTAGTGGTGGTG

GTGACAAGCATTGTGCTGCTTGTTGTGCCTTTCAGTCTCATCACAGCCTCCTATACTCTT

GTCTTCCTCACTGTCCTCCATATGAACTCTGTCAAGGGCAGGAAAAAAGTCCTAGCCACA

TGCTCTTCCCATTTAACTGTGGTGAGTCTCTTCTTTGGCCCAAACATATTCATCTACATG

ACTTTCACATCATCTCATAGTCCAGAACAGGACCAGGCTCTCTCTGTTTTCAGCAACATC

CTCACTCCCATGCTGAATCCCCTCATCTACAGCCTGAGGAACAAGGAGGTGGTGGCAGCT

CTCAGCAAGCTGATGGGGAGATGTGTGGTCTCTTAG

>LoafORs1.28

ATGAGGCTGAGATATGAAGAGAATAATGGCACATCAACCACAGATTTCATTCTCTTGGGT

CTCTTCCCTGGGTTTCAACACATCAGCCTTCTGGTCTACCTCTTCCTTCTGATCTATCTC

ATTGCCATCACAGGGAAAACTGCCCTCATTTTTCTGATCTGGGTGGACTTCTACCTCTAC

ACTTCCATGTACTTCTCACTCAACCAGCTCTCCCTCATTGACTTGGTCTACATTTCCAGC

TGTGTTCCTAAGATGGTCATCAGCCATTCCTTAGGAAAGCACAGCATTTCTCAAGTTGGC

TGTGGAGTCCAGATGTTCTTCTGCCTGACTTTTGGTGGAGCTGAGTGTCTCCTCTTAACC

GTTATGTCCTTTGACCGATTTGTGGCCATTTGTAACCCACTGCGCTACCCAATCATCATG

AGCCCTAAGGTTTGCTTGCTAATGGTAGTGGTGTCATGGTCTGGGGGTGCTCTAAACTCA

CTTATTCAAACTACCTACAGCATGCATTTCTCTGTCTGTGGACTGAAAGAGATCAATCAC

TCCTTCTGTGAGATGCTTGCCACCCTGAAACTATCCTGTGAGGACACTTTGGATTACGAG

ATTGTGGTGTCTGTAGTAAGTATTGCACTTATCCTCTTCCCCTTAAGCTTCATAATGGCC

TCCTATATTCGCATCTTCTTCACTGTTCTCAGAATGAACTCTCCTGAGGGGAGAAACAAA

GCTCTAGCCACACGCTGTTCCCACTTGACTGTGGTGAGTCTCTACCTGGGGCCAGGCATA

GTGGTGTACATGACACCTGGCTCTCCCGACAGCCCAGGGCTGGATCAAGGTTTCTCCGTG

TTCTACACCATCCTCATTCCCATGTTGAACTGCTTTATCTACAGCCTGAGGAACAAGGAG

GTGGTGGGGGCTCTGAGGAAGGCCATGGGGAGGAACCTAATACCAAAGTAG

>LoafORs1.29P

TCAGATTTCATTCTTCTGGGGCTCTTTCCTGGTTACAGACACTCTAGCATTCTCATCTCC

ATCATCCTTATCATCTACATCATTGCAGTTGCAGGAAATGCCACCCTTGTCCTCCTGATT

TGGGTGGACTCTAGGCTCCACACTTCCATTTACTTTTTTCTAAGTCAGCTCTCTCTCATT

GACCTGGCCTATGTTTCAAGCACAGATCCCAAGATGGCCACCGATTTCTGAGAACAGAAC

AATCTCCCATGTTGGCTGTGGTGCTCAGAAGTTCTTCTGTCTGATATTAGCTGATGCAGA

ATGCATCCTCCTGACTCTCATGGCCTATGACCGCTATGTGGCTGTGTGTAACCCTCGGAG

ATATCCAACCATTATGAGTTCCAGTGTCTGTCTGCAGATGGCTGTTGGGTCCTGGATTTG

AGGTAAGAAGAGTTGTACAGCTATTAAGTCATGAGCTATCAAAAGGAAAGGCTATAGCTT

TGTTACTCCGTCCAGAGTTTAGTAATTATCACATCTGTGCTAAATTCCTTGGCACAAACT

ATTTACTCGGTGCATTTCCCCAACTGTGAGAAAAGAGAAGTCAACTACTTTTTCTGTGAG

ATGCCTGCCATCCTGATGCTGCCTAATGGTGGTGGTGGTTATGAGCATCATTTTTATTAT

CATGCCACTATCTTTTATTACGGAAACCCTGGTGGCATAGTGATTAAGTGCTAC

>LoafORs1.30P

ATGGATCAAAGAAATGAAGCATAAGGCACAGATTTTTATCCCCCTGGGACACTCCTTGGA

TATGAAACATATCAGTCTTTTTATTTGTGCCATGCTTCTGATCTTTTCATGGCTCTCATT

TTGAACTCCACTCTCAATCTCCTGATCTGGGTAGATTCTTACCTCCACATACCTATGTAA

GTCCTGCTGAGGCAGCTGGCCCTCATGGACTTGACATTAATTTCTAGCTTTGTCCCCAAA

ATGGCCATCAACTTCTCAGGGAGGAGAAACTTCTCATGGTTGGCCTGATCTTCTTTCTGA

CTCTAGGAACCGCTGAGAGCAACCTCATCACCCTCATGTCTTATGATCAGTATGCGGCCA

TCCACAACCCTCTGAGATATGCCATCATCATCAGTCTGTGTACAGATGGCTGCCTTCTCC

TGGGCTGGAGGTGCCGTTACATCACTAGTACACACAGCCTGTGCCATGCATTTCCCTACC

TGTAGTAAAAAGAAAAAAAAAAAAAATTTTTTTTCTTTTTAGTTTCAGAGAGAAGAGATT

TCCCATTTCCTCCATGAGCTCACAGCCATCCTAAAGTTGGCTTGTAAGGATATCTCTGCT

TATGAGAAGGCTGTGGTGGTGACAAGAAACATGGTACTTCTTAGTCCCTTGTTCCTCATC

TTGTCCTCTTATGCTGTCATCTTCCTTGCCATCCTCCACATGAACTCCTCAGAGGGCAGG

GACAAAACCACTCCCATTTGACTGTGGTATGCCTCTACTATGGTCCTGCCATGGTGGTCT

AGTTCCTATCATAATGCCAAGCTGGGCCAGGTACTCTTTATACTGAGCACTATGTTGAAC

CCCCTGTTTTATAGTCTTAGGAGCAAACAAGTGGTGGGAGCCTTAAAGAAGGAGCTG

>LoafORs1.31P

CCCATGTACTCCGTGCTTTGTCAGCTCTCCCTCATTGACTTGGCCGTAATCTCAACTTCT

GTCCCCATAAGAGTCACAAACTTCTTCTCAGGGAAGAGAACCATATCACAGATTGGCTGC

GGAACTCAGATCTTCTTTAGCTTAACCCTGGGGATTGCTGAGTGCCTCCTGCTGACCCTC

ATGTCCTACAATCACTATATTGCCATCTGTAACCCTCTGCAGTACTCAGTCATCATGAGT

CACAACATCTATACACAGATGGTCATTGGGTTCTGGGCAGGAGGGGCAGTAACTTCCCTG

ATTCATACAGTCTGTGTCATGCAATTCCCTATCAGTTGTCCCCAAAAGATTCCTCATTTT

TTGTGTGAGGTCATGGCCCTTCTGAAGCTCACTAGTAAGGGCATTTCAGCCTATGTAAAG

TCAGTGGTAGTCTCCAGCCCTCTGGTGGTCCTGATTCCCTTGAGTCTCATCCTGCCCTCC

CACATCCTTATCTTCCTTGCTGTTCTCCACAGAAACTCACTAGAAGGCGGGAACAAAGCT

CTGGCCACCTGCTCCTCTCACCTCTGTGTGGTGAGCCTCTCCTTTGGTCCTGCTATACTG

GTCTACATGATACCTGGCTCCTCTATGACCCCCAAATTAAACCAATCTCCCCTTATGCTT

AATGTTGTCCTTACCCCTATGCTTAACCCTCTCATCTATAGCCTGAGAAACAAGGATGTC

ATAGCAGCCATGAAGAGTATAATC

>LoafORs1.32P

ATGGAGCAAGAAAATTAATCCACCACTGCAGATTTCATTTTCCTGGACCTCTTTTCTGAC

TCTCAGCATGCTGGCTTTCTTGTTACCATCCTCCTCCTGATTCTCCTGGCAGCCATCACA

GGAAGCTCCACTCTGGCCTTACTGATCTGGGGTGTTGCCCATCTCCACACATTCATGCAG

TTCCTGCTCAGCCAGCTCTCCTTCATGGACCTGACACTCATCTTCACCACTGTTCCTAAG

ATGGCCGCTGACTTATTCTCAGGAGATAGAGATATCTCCTACATTGGCTATAGAGTACAA

GTCTTTATTTATTTGATGCTAGGTGTGGCTGAGTGTATTCTCCTGAACCTCCTGGACTTT

GACCACTACTTGGACATCTGTAGCCTCCTGAGATACCCAGTCTTCATGACCCCCAGGCTC

TGTGTGCAAATGGCTGCCCGCTCACGGCCTGGGGGTATTCTTGTCTCTAATGAACAC/GG

GGTATTCTTGTCTCTAATGAACACAATCTATGCCATGCACTTTTCTACCTGTTGCTCCAG

GAAAATTCAGTTTTGTTTTTTTGTATGTGTATGTGAACTCACGGCCCTTCAGAAACTCTC

TTATGAAGACACTTCCACCTATGAGAAGGTGATCTTAGTGTCAGGCATCATTTTTCTTCT

TATTCCTTTTGGATTCATCCTGACCTCCTACATCCTCATCTTCCTCACTTTCCTCCACGT

GAACAACCCCAAGGAGAAGAGCAAAGCTCTGGCCATGTGTTTCTCCCAATTCAGTGTGGT

AAATCTCTACTTTGGTCCAACCATCATTATCCACACAACCCCAGGTTTCTCTCTCCCCCC

AGAGATGGACCAGCATCACTTCGTGTTTGATGTTCTCGGCACTCCCATGCTGAAACCCCT

AATCTACAGCCTGAGGAATAAGGAGGTATTGAGGGCTCTGAGGAAGGTGCTGAAT

>LoafORs1.33

ATGGATAAAAAAAATGAAACGTCAGTCACAGATTTCATCCTCCTGGGCCTCTCCTTGGAT

ATGAAACACATCAATCTGTTTATTGGTGCCATGCTTCTTATCTACATCGTAGCTCTCATT

TTGAACTCCATTCTCATTCTCCTGATTTGGGCGCATTCTCATCTCCACACACCCATGTAC

TTCCTACTCAGCCAGCTGGCTCTCATGGACTTGATGTTAATCTCTAGCTTTGTCCCCAAA

ATGGCCATCAACTTCTTCTCAGGGAGGAGAAACATCTCACGGTTGGCCTGTGGGACTCAG

ATCTTCTTCTTTCTGACTCTGGGAATTGCCGAGTGCATCCTCATCACCCTCATGTCCTAT

GACCGGTATGTAGCCATCTGCAATCCTCTGAGATATGCCATCGTCATGAGTCCTAGGGTC

TGTGTACAGATGGTTGCCTTCTCCTGGGCTGGGGGTGCCATTACATCACTGGTACACACA

GCCTATGCCATGCATTTTCCCACCTGTGGTTCCAAAGAGGTTTCGCATTTCCTCTGTGAG

CTCACGGCCATCCTAAAGTTGGCTTGTGAGGACATCTCAGCCTATGAGAAGGCTGTGGTG

GTGACAAGCATTGTGGTGCTTCTCATTCCCTTGTTCCTCATCTTGTCCTCTTATGCTGTC

ATCTTCCTTGCCATCCTCCACATGAAATCCCCAGAGGGCAGGGACAAAGCCCTGACCACT

TGCTCCTCCCATCTGACTGTTGTATGCCTCTACTACGGCCCTGCTATAGTAGTGTACATG

AGGCCTAGTTCCTATCATAATGCCAAGCTGGACCAGGTACTCTTTATACTCGGCCCTATT

CTTACACCTATGCTGAATCCCCTGATTTATAGTCTTAGGAACAAAGAAGTAGTGGGAGCC

CTAAGGAAGGTGCTGAGCTAA

>LoafORs1.34P

AATGAATCCACCACCACAGATTTCATTCTCCTAGGTCTCTTCTCTGACTCTTAGCATCCT

GGCTTTGTTGTTGCCATTGTCCTCCCGATTTTCGTGGTGGCCATCCCTGTAAACATCATC

CTGGCTTTGCAGATCTGGGGTGATGTTCACCTCCACACACCCACGTACTTCCTGCTCAAC

CTACTCTTCCTCATGGAGCTGACACTCATCTCCACCACTGACCACAAGATGGCCACCAAC

TTTTTCTCA/TCTCAGAACAGAGATATCTTCCACGTTGGCTGTGGAGTCCAAATCTTTCT

TCACTTAATGCTAGGAGTGGCTGAGTGCGTTCACCTGCCCCTCATGGCCTTAGACTGCTA

CTTGGCCATCTGTAGCTCCCTGAGATACCCAGACTTCATGTGTGCAAATTGCAGCTAGCT

CATGGGCTGGGGGTGCTGTTGTCTCCCTAATGCACACAATTTATGCCATATACATTTTGA

CCTGTGGCTCCAGGAAAATTCACGTTTTTTTTTTTTTTTTTTTTGTGAAGTCATAGCCCT

TCTGAAACTCTCTTGTGAGGACACTTCCACCTATTAGAAGGTATTATTAGTTTCAGGCAT

CATTTTCCTTCTTATTCCTTTTGGATTCATCCTGACCTCCTAC/CTAAACTCCCCTGAGG

GCAAGAACAAAGCTCTGGCCACTTGCTCCTCCTACTTTAGTAAGCTACTTTGATCCACCC

ATGCTTATATACATGACCCCTGGTTCCTCCCTCCCCCAGAGGTGGACAAGCATCTCTTTG

TGTTTGATGTTCTCATCGCTCCCGGGTTGAACTCCCTTATCTACAGCCTGAGGAACAAGG

AAGTGATAGAGGCTCTGAGGAAGGTGCTAGGGAGA

>LoafORs1.35P

AGCATCCTCATCACTTCCATTCTTCTTGTCTATATCTTCGCCTTCACTGGAAACACCATC

CTGATCTTCCTGATCTGGGTGGACTTCCACCCCTACGCTCCCATGTACATACTGCTCAGC

TGTTTCTTTCTCATTGACTTGGCCTTAATTTTCACCACAGTCCCAAAAATGGCCATCAAC

TTTTTCTCTGGGAAGAAATACATCTCAAAAGTTGTCTGTGGAACACAGAATTTCTTCTTC

TTTGTCTTTGTGGGTGTTGAGTGTCTCCTTTTGACCCTCATGTCTTATGACTGCTATGTA

GCTATCTGCAACCCC/CCCCTGAGATATCCAGTTATCGTGAACCCTAGAGTCTGACTGTT

GATGGTCCTAGTGTTGTAGGGTGGCGGTACCTTGAATTCCCTCATCAAAACCATTTATAC

CATGCATTTTTCTCTTCTGTGGCTCCAGGGAGATCCAACACTTTTTTCGCGAGATGCCTG

CTGTCCTGAAGCTCTCTTGTGAAGAGATTTCCTTGTCTGAGACAGTGTTATCTGTCATCT

GCATTGTGTTTGTTCTTCCCTTGGGACTCACCATGGTTTCCTACATGCTATCTTTCTCAA

AGTCCTCCACATGAATTCATCGGAGGGCAGGAAGAAAGCATTGCCCACCTGCTCCTCTCA

TCTGGCTGCAGTGATCCTCTATTATGGACCAGCCATGATCATCTACATGACCTCTCACTC

CTTTCACACTTCAGATCAAGATGAAATACTCTCCATAATTAATGACTCTTCACCGCCATG

CTGAAACCCC

>LoafORs1.36P

ACAACAGATTTTATTCTCACGGGACTCTTTGCCAATATGAAATATGTCAGCATCCTTGTC

TACACTATCACCCTGATCTACTTTCCTGCAGTCACTGGGAACTTCATCCTGCTCCTCCTG

ATATGGATGGATTTGAGGCTTCATACCTCAATGTATTTTCTGCTT/TTCTGCTTCAGCCA

GCTTTCTTTCATAGACCTGGCTTTCATCAGTAGCACTCGTCCAAAGATGGCTATCAACTT

TTTCTCTGGGAAGAAGAACATTACACACCTCACCTGTGGAACCCAGCCATTTTTCTTCTT

TACTCTTGGAGGTGCTGAAAGCATCCTCTTGGCCCTCATTGCCTATGACCATTAGGTAGC

TTTCTGTAATCCTGTGAGATACATAGTAATCATGAAC/TATGCCATAAGTTGGCTTATCT

GTGGGTCCAGAGAAATCCACCATTTCTACTGTTAGGTGCCAGGGATTATGAAGATCTCAT

GCAAAGATACTTTCACCTATGAGCTGGTGGCCTTCATGATGGGCATTGCATATATGATTA

TCCCCTTTGGACGTATCATGGCTTGTTACACCCTCATCTTCCTCACTGTCCTTCAGATGA

AAACACCCCAAGGCAGGAACAAAACTTTAGCTACCTGCTCCTCCCATCTTACAGTGGTAA

GTATGTGG

>LoafORs1.37P

AATGAAGCCTCAACTGACTTCATCGTTCTAGGGCTCTTCCCTGGGTTCAGGTATCCCCAT

CTCCTCATCCTCGTCATCCTCCACATCTACATAATTGCTTTTACTGGAAACGCCCTCCTG

ATCCTCCTCATCTGGCTGGACACCTGCCTTCACACTCCGGTGTACTCCCTGCTCAGCCTG

TTCTCCCTCATTGACCTATCTTACATCACCAGCACAGACCCCAAGATAGTAACCAGTTAC

TTCACAGGGAGGAAGAACATTTCCTATTTTGCCTGTGCAGCTCAGTTGTTTTTCTTTCTC

ACCCTTGGCCTTGCTGAGTGCATCCTCCTGACCTTCATGGCTTATGTGGCTTATATGGCT

CTCTGTAACCCCCTGAGATACACAATTCTCATGAGCCCCAGGGTCTGTCTGCAGATAGCT

GCCGCAGTCTGGATTGGGGCAGCTCTGGCCTCCCTTGTCCATACCATCTACCCAATGCAT

TTCCCTATCCGTGGCTCCAGGAAGATTAATCATTACTTTTGTGAGAAGCCTGCCATCTTG

AGACTGTCTTGTGTGGACATATCAACCTATGAGATGGTGAAATTTGTGTCAACTATTGTG

TTCCTTCTGGTCCCGTATGTTTTTACGCTGTCATCATACACCCTCATCTTCCTCACTGTC

CTCAGGATGAATTTCCACAAGGGGAGGAACAAAGCCCTGGCCCCCTGTTCTTCCCACCTA

ACCGTGGTGAGTGTCTACTTTGGTCAGGCCATCTTCATCGACATGACACCCAGCTCTTCT

CACACCTGAACAAGACCAGATAGGAGCCGT

>LoafORs1.38P

ATGAACTCTACTGAGGGCCGCAGGAAGGCACTCACCACCTGCTCCTCTCACATGGTGGTA

GTGCTGCTCTTTTTTGGTGCCTTCATCTACACCTACATGTCCCCCAGATCCTAGAACACA

GCTGAGCAGAACATGGTGGTGTCTGCTTTTCACACTATCATCACCCCTGTGCTGAACCCC

CTCATTTACAGCCTCTGGTACAAAGACATCACTGGGGCCCTGAGGTGCATGATGCCATCA

GGGATGAGACTGAGAAAAGCGGGAAATGTGAAAACC

>LoafORs1.39

ATGGACAACATCACATGGCTGGCCAACCACACTGGAAGGTCTAATTTTATCCTGTTGGGA

CTCTTCAGTCAATCCAAACACCCAACTCTGCTCTGTATGGTTATTTTTGTGATTTTCCTG

ATGGCCCTAACTGGAAACACCATTCTCATCCTCCTGATATACTCTAATGCCCACCTCCAC

ACTCCCATGTACTTTTTCATTAGCCAGTTGTCTGTCATGGATGTGATGTACATTTCTGTC

ACGGTGCCTAAGATGCTCATGGACCAGGTCATGAGTGTCAAAAAGATCTCAGTTCCTGAA

TGTGGGATACAGATGTTCCTCTACTTGACTCTAGGAGGATCAGAATTTTTCCTTCTGGCT

GCCATGTCCTATGACCGGTACATGGCCATCTGCCATCCGCTCCATTACCCTGTCCTTATG

AACCATAAGATATGTTTCCTTCTGGCATCTGGCTGCTGGTTCTTAGGTTCAGTGGATGGC

TTCATGCTCACTCCCATCACCATGACCTTCCCCTTCTGCAGATCCAGGGAGATCCATCAC

TTCTTCTGTGAGGTTCCTGCCATAATGAAACTCTCCTGCTCTGATACCTTGCTCATTGAG

ACACTCATGTACCTGTGCTGTGTCCTCATGATCTTCATCCCTGTGACAGTCATTTCAAGC

TCCTACACTTTCATCCTGCTCACTATCCATAGGATGAACTCGGCAGAGGGCCGGAAGAAG

GCCTTCACCACCTGCTCCTCCCACATGACTGTAGTCATCCTCTTCTATGGGGCTGCAGTC

TACACTTACATGATCCCCAGCTCCTACCACACCCCAGAGAAAGACATGGTAGTGTCTTTC

TTTTACACTATCCTCACTCCTGTGCTAAACCCTTTAATCTATAGTCTTAGGAATAAAGAT

GTCACAGGGGCTATGAAGAAAATGTTTAATGTGGAACCTGTTAAGAAAGTATGA

>LoafORs1.40P

AATGCTACTGAGGGCTGCAAGAAGGCCCTCGCCACCTACTCCTTTCACACAGTGATAGTG

CTGCTCTTTTTTGGTGCCTCCATCTACACCTATATGCTGGCCAGATCCTATCACACAGCT

GAGCAGGACATGATGGTGTCTGCTTTTTACACCATCATCACCCCTCTGCTGAACCCCCTC

ACTTACAGCTTCTTGAACAAAGACGTCACAGGGGCCCTGAGGAGCATGATACCATCAGGG

ATGAGACCAAGAAAAGTAGGAAATGTGAAAACT

>LoafORs1.41

ATGGACAACATCACGTTGCTGGTCAACCACACTGGAGGGTCTGATTTTATCCTGTTGGGA

CTCTTCAGTCAATCCAAACACCCAACTCTGCTCTGTACGGTTATTTTTGTGATTTTCATG

ATGGCCTTGACTGGAAATGCCATCCTGATCCTCCTGATACACTCTAATGCCCACCTCCAC

ACTTCCATGTACTTTTTCATCAGCCAGTTGTCTGCCATGGATGTGATGTACATTTCTGCC

ACTGTGCCCAAGATGCTCATGGACCAGGTCATGGGTGTCAAAAAGATCTCAGTTCCTGAA

TGTGGGATACAGATGTTCCTCTACTTGACTCTAGGAGGATCAGAATTTTTCCTTCTGGCT

GCCATGTCCTATGACCGGTACATGGCCATCTGCCATCCACTCCATTACCCTGTCCTTATG

AACCATAAGATATGCTTCCTTCTGGCATCTGGCTGCTGGTTCTTAGGTTCAGTGGATGGC

TTCATGCTCACTCCCATCACCATGACCTTCCCCTTCTGCAGATCTAGGGAGATCCATCAC

TTCTTCTGTGAGGTTCCTGCTGTAATGAAACTCTCCTGCTCTGATACCACACTCATTGAG

ACACTCATGTACCTGTGCTGTGTCCTCATGCTCCTCATTCCTGTGATAGTCATTTCAAGC

TCCTACACTTTCATCCTGCTCACTATCCATAGGATGAACTCGGCAGAGGGCCGGAAGAAG

GCCTTCACCACCTGCTCCTCCCACATGACTGTAGTCATCCTCTTCTATGGGGCTGCCATC

TACACCTACATGATCCCCAGCTCCTACCACACCCCAGAGAAAGACATGGTAGTGTCTTTC

TTTTACACTATCCTCACTCCTGTGCTAAACCCTTTAATCTATAGTCTTAGAAATAAAGAT

GTCACAGGGGCTATGAAGAAAATGTTGAATGTTGAACCTGTTAAGAAAGCATGA

>LoafORs1.42P

ATGAACTCTACTTAGGGCTTCAAAAAGGCCCTTGTCACCTGCTCCTCTCAGGCAGTGGTA

GTGCTGCTCTTTTTTGGTGCCTCCATGTATATGCTGGCCAGATCCTATCACACGGGTGAG

CAGGACATGATGGTGTCTGCTTTTTACACCATCATCACCCCTCTGCTGAACCCCCTCACT

TACAGCTTCTGGAACAAAGACATCACAGGGGCCCCGAGGAGCATGATACCATCAGGGATG

AGACCAAGAAAAGTAGGAAATGTGAAAACC

>LoafORs1.43

ATGGACATCACTTGGCTGACCAACCACACTGGAGGGTCTGATTTTATCCTGTTGGGACTC

TTCAGTCAATCCAAACACCCAACTCTGCTCTGTGTGGTCATTTTTGTGATTTTTCTGACG

GCCCTGATTGGAAATGCCATCCTGATCCTCCTGATACACTCTAATGCCCACCTCCACACT

CCCATGTACTTTTTCATCAGCCAGTTGTCTGTCATGGATGTGACGTACATTTCTGCCACT

GTGCCGAAGATGCTCATGGACCAGGTCACGGGTGTCAAAAAGATCTCAGTTCCTGAATGT

GGGATACAGATGTTCCTCTACTCGACACTAGTAGGATCAGAATTTTTCCTTCTAGCTGCC

ATGGCCTGTGATCGATACATGGCCATCTGCCATCCACTCCGTTACCCTGTCCTAATGAAC

TACAGAATATGTCTCTTCCTGGCAACTGGCTGCTGGTTCTTAGGTTCAGTGGATGGCTTC

ATACTCACTCCCATCACCATGACGTTCCTTTTCTGCAGATCCAGGGAGATCCATCACTTC

TTCTGTGAGGTTCCTGCCGTAATGAAACTCTCCTGCTCTGATACCTCACTCATTGAGACA

CTCATGTACCTGTGCTGTGTCCTCATGCTCCTCATTCCTGTGATAGTCATTTCAAGCTCC

TACACTTTCATCCTGCTCACTATCCATAGGATGAACTCGGCAGAGGGCCGGAAGAAGGCC

TTCACCACCTGCTCCTCCCACATGACTGTAGTCATCCTCTTCTACGGGGCTGCCATCTAC

ACCTACATGATCCCTAGCTCCTACCACACCCCAGAGAAAGACATGGTAGTGTCTTTCTTT

TACACTATCCTCACTCCTGTGCTAAACCCTTTAATCTATAGTCTTAGGAATAAAGATGTT

GGATGA

>LoafORs1.44P

ATGAACGCTGCTGAGGGCTGCAAGAAGGCCCTCGCCACCTGCTCCTCTCACACAGTGGTA

GTGCTGCTCTTTTTTGGTGCCTCCATCTACACCTATATGCTGGCCAGATCCTGTCACACA

GCTGAGCAGGACATGATGGTGTCTGCTTTTTACACCATCATCACCCCTTTGCTGAACCCC

CTCATTTACAGCTTCTGGAACAAA

>LoafORs1.45P

ATGCGCTCAGTAAATCAAACTTCAAGCACTGATTTCATCCTGGTGGGGCTCTTTGGTTCA

ACAAAGCATGCAGTCCTCCTCTACAGTCTGTCCTTCATCTTATTCTTGATGGCCCTAACT

GGAAACGCCCTTCTCATCCTCCTAATCCACAGGGAGTCCTGCCTTCACACCCCCATGTAT

TTCTTCATTAGCCAACTCTCTCTCATGGACCTCATGTACATATGTTTGATCATCCCCAAG

ATGCTCATGGACCAGGTCATGGGAGATCATACAATTTCCCCCTTAGGTTGTGGGGTCCAG

GTGTTCTTCTATCTGACCCTCGCTGGAGCTGAGTTTTTCCTCCTGGCTGCCATGGCCTAT

GACCGATATGCTGCCATTTGCAGACCTCTCCATTACCTACTGCTCATGAACCAGAGAGTC

TGCCGGCTCCTTGTGTCTGGATGCTGGTTCCTGGGAACAGTTGACGGTTTGTTGCTTACC

CTATTACCATGAGTTTCCCCTTTT/CCTATTACCATGAGTTTCCCCTTTTGTCACTCTAG

GAAAATCATGAACTTCTTCTGTGAAGCCCCAGCCCTGCTGAAGCTCTCCTGCTCTGATAT

TTTCCTATACAAGACACTCATGTATTTGTGCTGTGTCCTTATGCTCCTCGTCCCTGTCTC

CATCATCTCCACCTCATATGGGTTCATCCTGCACCTTATCCACAGGATGAATTCAGTTGA

GGGCTGCAGGAAGGCCCTCGCCACCTGCTCCTCTCACATGGTGGTAGTGCTGCTCTTTTT

TGGTGCCTCCATCTACACCTACATGCTCCCCAGATCCTACCACACAGGTGAGCAGGACAT

GATGGTGTCTGCTTTTTACACCATCATCACCCCTGTGCTGAACCCCCTCATTTACAGCCT

CCGGAACAAAGATGTCACAGAGGCTCTGAGAAGCATGATGTCATCAGGGATGAGACTGAG

AAAAGTGGGAAATGTGAAAACC

>LoafORs1.46P

TATGCGGCCATCTGCCAGCCCCTCCACTACCCTGTCATTGTGAACATCTGATTCTGTGTT

CAGGTGACACTGGCTTCCCTACTCAGTGGTCTGGTTTATGCTGGTGTGCACACTGGCAAC

ACATTCTGGTTGCCCTTCCGTCAGTCCACATGGTCCATCAGCTCTTCTGTGATGTCCCCT

CTCTGCTGTAGCTCTCTTGCTCTGACACCTCCAGCAATGAACTCTTAATTCTTTTCTCTG

CTATAGAGATTGGTAGTGCCTCCTGTGTCTTCATTGCCATATCTTATATTCACATATTTT

CTACTGTACTTAAGTTTTCAACCAGCAGAGAGTGAGGAAATGCCTTTTCCACCTGTGCCC

TCACATCCTGGTAGTGTCTGTCTTCCTCAGCTCTGGCAGCTATGTGTACTTTCAAAAACT

TCTGAAACAATTCAGGACATGATTCTTTCTGTATTTTATGTCATAGTTCCTCCTTTCTTG

AATCCTATCATCTACAGCCTTAGAAACAAACAAGTGGGGGAAACAGTGAGGAAAGTAATA

TTAAAAAGATTTTATTCAGGAAAA

>LoafORs1.47

ATGCCCAACTCTACCACAGTCACTGAATTCCTGCTTATGAGGTTTTCTGATGTGTGGGAG

CTCAGAGTCTTGCACGCCATGTTATTCCTAATGATGTACTTGGCGACTCTGCTGGGGAAC

TTTCTCGTTGTCACAGTAACCACTCTGGCCGAGAGTCTTCACACTCCCATGTATTTCTTC

CTTAGAAATCTGTCTGTCCTGGACATGTGCTACATTTCCATCACTGTACCCAAGGCATGT

GTCATCTTCCTGCTTGACAACAGGGTAATCTCCATGGTTGGATGTGCAGCTCAGATCTTC

CTTGTGATTTTGTTTGCTTTTGCAGAGCTGCTATTTCTCACAATCATGGCCCGTGACCGC

TATGTGGCCATCTGCCAACCCCTCCACTACCCTGTGATCATGAACCCTCGGGCCTGTGTC

CAAATGACACTGGCCTCAGTATTCAGTGGTCTGATCTATGCAGGTGTATACACTGGCAAT

GCATTCCGGTTGTCCTTCTGTCGTTCCAATGTGGTCCATCAGTTCTTCTGTGACGTCCCA

TCTCTACTGAAACTCTCCTGCTCTAACACTTTCAGCAATGAGATTGTAATTTTTGTCTCT

GCAGTGGTTATTGTAGGTGGCTGCTTTATCTTCATCATCATGTCTTATATTCGCATATTT

TCTGCTGTGCTCAAGTTTCCAACCAGAGGAGAGCGAGGGAAAGCCTTTTCTACCTGTGTT

CCTCACATTCTTGTAGTGACAGTCTTTGTTGTCTCAGCCATTACTGTCTATATGAAGCCG

ACCTCCAATTCACCTACAACTCAGGACATGATTATTTCTGTGTTCTATTCTATAGCCCCT

CCTTTCCTAAATCCTATTATCTATAGTCTCAGAAACAAGCAGATAAAGGAGGCTGTAAGG

ACAGTTATGAGTAGGATGCTCTATTCAGAAAAACAATAA

>LoafORs1.48

ATGCAAAAAAAGTATCCAAAGATGCCCAACTCTACCACAGTGACTGAATTCCTGCTTATG

AGGTTTTCTGATGTGTGGGATTTCAGAGTCTTACACGCCATGTTATTCCTATTGATGTAC

TTGGCAACCCTGCTGGGGAACCTTCTCATTGTCACAGTAACCACTCTTGACCAGAGTCTT

CACACCCCCATGTACTTCTTCCTTAGAAATCTGTCTGTCCTGGACATGTGCTACATTTCC

GTCACCGTCCCCAGGGCTTGTGTCATCTTCCTGCTTGAAAACAGGGTGATCTCCATGGTT

GGATGTGCAGCTCAGATCTTCCTTGTGGTTTTGTGTGCCACCGCAGAACTGCTTTTCCTC

ACCATCATGGCCTATGACCGCTATGTGGCCATCTGCTATCCCCTTCACTACCCTGTGATC

ATGAATCTTCGTGTCTGTGTCCAGATGACACTGATCTCTGTATTCAGTGGTCTGATCTAT

GCAGGTGTGCACACTGGCAACACATTCCGGTTGTCCTTCTGTCAGTCTAACGTGATCCAT

CAGTTCTTTTGTGACATCCCCCCTTTGCTGAAGCTCTCCTGCTCTGATACTTTCATTAAT

GAGGTTGTAATTTTTTTCTCTGCAGTAGTGATTGTAGGTGGCTGCTTTATCCTCATCATC

ATATCTTATATTCACATATTTTCAGCTGTGATAAAGTTTCCAACCAGAAGAGAGAAAGGA

AAAGCCTTTTCCACCTGTGTACCTCACATTCTTGTGGTGACAGTCTTTTCCAGCTCCCTG

AACGCTGTGTATATGAATCCAACCTCCAACTCACCAACAATTCAGGATATGATCATTTCT

GTTTTCTACTGTATAGTCCCTCCTTTCCTAAATCCTATCATCTATAGCCTTAGGAACAAG

CAGATAAAGGAGGCTGTAAGGAGAATTATGAGAAGAATATTCTACTCAGAAAAATAA

>LoafORs1.49

ATGCCTAATTCTACCACAGTGACTGAATTCCTGCTTACAAGATTTTCTGATGTGTGGGAG

CTCAGAGTTTTGCACTCCATGTTATTCCTACTGACGTACTTGGCAACCCTAATGGAGAAC

TTTCTCATTGTCACAGTAACCACTTTTGACAAGAGTCTTCACACCCCCATGTATTTCTTC

CTTAGGAATCTATCTGTCCTGGATACATGCTACATTTCTGTTACTGTACCCAAAGCATGT

GTCATCTTCCTGCTTGACAACAGGGTAATTTCCATGGTTGGATGTGCAGCTCAGATCTTC

CTTGTGGTTTTGTGTGCTTTTGCCGAGATGCTGTTCCTCACTATTATGGCCTATGACCGC

TATGTGGCCGTCTGCCATCCTCTCCACTACCCTGTGATCATGAACCGTCGCGTTTGTGTC

CAGATGACACTGATCTCCATACTCAGTGGTGTTATCTACTCAGGATTTCACATGGGCAAC

ACATTCTGGTTGATCTTTTGTCAGTCCAACGTGGTTCACCTGTTCTTCTGTGACATACCC

TCTCTTTTGAAGCTCTCCTGCTCTGACACCTCCAGCAATGAGATTGAAATTTTTGTCTCT

GCACTAGTAATTGCAGGTGGCTGCTTTTTTTTAATCATTATGTCTTATATTCGCATATTT

TCCACTGTGTTCAAGATTCCAATTGGGGGAGAGAGAGGAAAGGCCTTTTCCACCTGTGTC

CCTCATATTGTTGTGGTAACAATCTTTGCCATCACAGGCTCTGCTGTGTACATGAATCCA

ATCTCCAAATCCAACTCATTTCAGGACATGATTATTTCTGTGTTCTATTGTATAGCCCCT

CCTTTCCTAAATCCTATTATCTATAGTCTTAAAAACAAGCAGATAAAAGAGGCATTAAGC

AGAATTATAAAAAGAATGCTCTATTCAGGAAAATGA

>LoafORs1.50

ATGACCAACACGAGTTTCCCAGTGGGCTTCATCCTGCTAGGCTTCTCCAAATGGCCCCAG

ATGGAAAAGGTTCTCTTCTGGTTTGTGGCATTCTTCTACATTATGATCATCTTTGGAAAC

CTGACCATCATTGTGCTTTCTTGCATAGATCCTCGTCTCTATACACCCATGTACTTCTTC

CTTAGCAATCTCTCTTTCTTGGAGCTTTGCTTCACCACAACTATGGTGCCCCAGATGTTG

TCAAACTTGTGGGGACTGGAGAAGACCATCACCTACACGGGCTGTGTCATCCAGCTCTGT

GTGTTCCTCTTTCTTGGTGCCACGGAATGCATTTTGCTGGTGGTGATGGCCTTTGACCGC

TATATTGCTGTCTGCCAGCCACTGCGCTACACCATCATAATGAACCCACTTCTCTGTTGG

AAGCTGGCGCTCACAGCCTGGCTCTCTGGCCTGGTGGAATCTCTGATCCAATCTCCCATC

ACACTCCAGCTGTCCTTCTGTTCCCACCACCGTGTGGATGACTTTCTCTGTGAGGTGCCT

GCCCTCATACGCCTGGCTTGTGGAGACACCTCCTCCAATGAGTGGCAGTTGACCATCTCT

GCCATCCTCTTCACCATCCTGCCTGTGGGGTTGATCCTAACTTCTTATGGCTACATAGCT

CAAGCTGTGGGGAAAATCAAGTCAGAAGAAGGGAGGCAGAAAGCCATTGCCACCTGCTCC

TCCCATCTTCTGGTTGTCTTCATGTTTTATGGGACAGTGGCAATGGTTTACACAGACCCT

AAGAATGACTTTGCTTCCAAACATGGAAAGTTCTTCACCTTCTTCTACACTGTGGTAACA

CCATTGTTGAACCCTCTCATCTATACCCTGAGAAACAAAGAAGTAAAAGAAGCCCTGCTA

AGATTGCTGATAAAGGGGTTCAGTAAACAACGATAG

>LoafORs1.51P

ACCAACACGAAATTCTCAGTGGACTTCATCCTCCTACGCTTTTCTTAGTGGCCTCAGCTG

GGAAAGATTCTCTTCTGGATTGTGGCAATCTTCTACATCATGATCTTCTTTGGCAACCTG

ACCATCATTGTGCTGCCTTACATAGACCTTTGCCTGTACATACCTATGTACTTCTTTATT

AGCAATTTCTCCTTCTTGGAGCTCTGCTTTACCACCACCACAGTGCCCCAGATATTGTCA

AACTTGTGGTAACCTGAGAAGACCATCACCTACACAGGCCGTGTCATCCAACACTGTGTG

TTTATCTGTCTTGATGCCACAGAAGATGTCTTCCTGGTGGTGATGGCCTTTGACCGCTTA

TGTTGCTGTCTGCCA/TATGTTGCTGTCTGCCAGCCACTGCGCTACACCATCATAATGAA

CCCTCCTCTCTGTTGGAAGCTGTCCCTTATGGCCTGGCTCTCTTGCCTGATGGGATCTCT

GATCCAATCTCCCATCACATTCCAGCTGTCCTTCTGTTCCCACCACTTCTTGGATGAGTT

TCTCTGTGAGGTGCCTGCCCTCATATACCTGGTTTGTGTGGACACCTCCTCCAATGAGTG

GCAGTTGACCATCTCTGCCATCCTCTTCACCATCCTGCCTGTGGGGTTGATCCTAACTTC

TTATGGCTACATAGCTCAAGCTGTGGGGAAAATCAAGTCAGAAGACGGGAGGCAGAAAGC

CATTGCCACCTGCTCCTCCCATCTTCTGGTTGTCTTCATGTTTTATGGGACAGTGGCAAT

GGTTTACACAGACCCTAAGAATGACTTTGCTTCCAAACATGGAAAGTTCTTCACCTTCTT

CTACACTGTGGTAACACCATTGTTGAACCCTCTCATCTATACTCTGAGGAACAAAGAAGT

AAAAGAGTCTCTGAAAAGATTGCTGAAGAAATAGATAAGCCAA

>LoafORs1.52

ATGAAGAACAGCACTTCATCCTCTGACTTTATCCTGCTGGGGCTTCTAGTGAACAGTCAG

GCTGCAGGGATTGTCTTCACAGTTATCCTTGCTATTTTCATGGTGGCTGTAATTGCGAAT

TTGGTCATGATATTTTTGATTCAGGTGGATTCCCACCTCCACACCCCCATGTACTTTCTG

CTCAGCCAGTTGTCCATCATGGACACCCTTTTCATTTGTACCACTGTCCCAAAGCTTCTG

GCTGACATGGTGTTCCAAGAGAAGACCATTTCCTTTGTGGCCTGTGGCATCCAGATCTTT

CTCTACCTGACCATGATTGGCTCAGAGTTCTTTCTTCTGGGCCTCATGGCCTATGATCGC

TATGTGGCTGTCTGTAACCCCCTTAGGTACCCAGTCTTGATGAATCGCAAGGTGTGTCTC

CTTCTGGCTGCTGGTGCCTGGTTTGGTGGCTCTCTTGATGGCTTTCTGCTCACCCCCATC

ACTATGAATGTCAACTATTGTGGCCCCCGCAGTGTCAACCATTTCTTCTGTGAGATCCCT

GCTGTTCTCAAGCTGGCTTGTGCCGACACATCCTTGTATGAGACCCTGATGTACATCTGC

TGTGTACTCATGCTGCTCATCCCCATCTCCATCATCTCCACTTCCTACTCTCTCATCTTG

TTAACTGTCCACCGCGTGCGCTCTGCAGAAGGCCAGAGAAAAGCCTTTACCACTTGCTCA

TCCCACTTGACTGTTGTCAGCATTTTCTATGGGGCTGCCTTCTACACGTATGTGCTGCCC

CAGTCATTCCACACCCCCGAGCAGGACAAGGTAGTGTCAGCCTTCTATACCATCATCACA

CCCGTGCTCAACCCCCTGATCTACAGCCTCAGGAACAAGGATGTCATGGAGGCATTTAAA

AAGGTATTTGTGCGATGCTCATCTGCTCAGAAAGTAGCAACAAGTGATGCTTAG

>LoafORs1.53P

AACTCCATTGACTTCATCCTTTTGGGCCTCACCACCCATCCCTTGTTCCCTGAGTTTATC

TTCTCCATCTTTGTGGTGGCTGTAATAGCCAATGTGGTCATGATTCTGCTCATTCATGTA

GATTTTCACCTCCGCACACCCATGTACTTCTTGCTCAGCCAACTCTCCTTCATGGACACA

GTCTACATCTGCATCACTGTCGCCAAGATGCTGCAAGACCTTCTGTCCAAGGAAAAGAGC

ACCTCCTTCCTTGACTGCAGTTTAGATATTTCTCTACCTGACATTGATTGGAGGAGAATT

CTTCCTGCTGGGCCTCATGGCCTATGACAGATATGTGGTTGTGTGCAACCCTCTCCGGTA

CCCTCTCCTCATGAACCACAGGATTCGCTTGTTTATGGTAGTGGGCTTCTGGGTTGGTGG

CTCCTTGGATGGATTTATGCTGATCCCGGTCACCATGAATTTTCCCTAATGTGGGTTCCA

AGAAATCAATCACTTTTTTGTGAGATTCCAGCTGTGCTGAAGCTATTGTGTATGGACATG

TCCCTGTATGAGACTCTCATGTATTCTTGCTGTGTGCTGATGCTGCTCATCCCCATATCT

ATCATCTCTGTCTCCTACACACGGATTCTGATTACTGTCCATTGGATGAATTCTGCTGAG

GACCGGCGCAAAGCCTTTTGCTAACTGTTCCTCCCATATTATGGGGGTGAGCATTTTCTA

CGGTGCAGCCTTCTACACCAACGTGCTACCCATTCCTACCACACACCAGAGAAAGACAAG

GTTGTGCCTGCCTTCTACACCATCCTCACTCCCATGTTCAATCCATTCATCTACAGTTTG

AGGAATAAATATGTGGCAGCAGCTCTAAGAAAAGTGTTGGGGAGATGGGCCTCCTCACAA

AGAATCAGGGAGAGATGTGTATCTAGGAAATAC

>LoafORs1.54

ATGGAGTGGGGGAATTATTCCACGTATGCCGACTTTGTCCTCTTGGGCTTGTTCAGCAAC

ACTCGCTTTCCCTGGCTCCTCTTCGCTCTCATCCTCCTTGTCTTTGTGATCTCCATAGCC

AGCAACACCATCATGATCATTCTCATCCACGTAGACTCCCGCCTCCACACCCCCATGTAC

TTCCTGCTCAGCCAGCTCTCCCTCATGGACATCCTATACATTTCTACCATTGTACCCAAG

ATGCTGGTTGACCAGGTGGTGGGACAGAGGGACATTACCTTTGCAGGATGCACAGCCCAG

CACTTCCTCTACTTAACCTTGGCAGGTGCTGAGTTCTTTCTCCTAGGACTCATGTCTTAC

GATCGCTATGTGGCCATCTGCAACCCTCTTCATTACCCTGCCCTCATGAGCCGCAAAGTC

TGCTTGTTGATCGTGGTGGCAGCCTGGCTGGGAGGGTCTGTGGATGGATTCCTGCTCACC

CCAGTCACCATGCAGTTCCCCTTTTGTGCATCTCAGGAAATTAACTACTTCTTCTGTGAG

GTGCCTGCCCTTCTGAAGCTCTCCTGCATAGACACATCAGCCTATGAGACAGCCATGTAT

GTCTGCTGCATCATGATGCTTCTCATTCCATTCTCTGTCATCTCTGCCTCTTACACCAGA

ATCCTCATCACTGTTTACGGGATGAGTGAGGCAGAGGGGAGGCGGAAGGCGGTGGCCACC

TGCTCCTCACATATGGTGGTGGTCAGCCTATTCTATGGAGCCGCCACATACACATATGTG

CTGCCTCACTCTTACCACACCCCTGAGCAGGACAAGGCTGTATCTGCCTTCTATACCATC

CTCACTCCCATGCTCAACCCACTCATCTACAGCCTCAGGAACAAGGATGTCACAGGGGTT

TTGCAGAAGGCCCTGGAGAGAGGTTTCTCCTTGTAA

>LoafORs1.55

ATGGTGGGATCAATGGAAGAGTATAATACATCCTCTACAGAGTTTACCTTCATGGGGCTG

TTCGGCAGGAAGGATACAGCAGGACTTCTTTTTGCCATTGTCACTGTTATCTTCTTCACT

GCACTGATGGCTAATGGGGTCATGATCTTCCTGATCCACACCGACTCATGCCTCCACACT

CCCATGTACTTCCTGCTCAGCCACCTCTCCTTCATTGACATGATGTACATCTCTACCATT

GTGCCCAAGATGCTGGTCGATTACATGCTGGGCCAAAGGACCATTTCCTTTGTGGGGTGC

ACAGCTCAACACTTCCTCTACCTCACCTTGGTAGGAGCAGAATTCTTCTTGTTGGGCCTC

ATGGCCTATGACCGCTATGTGGCCATCTGCAGCCCTCTGAGATACCCTGTCCTCATGAGC

CGCAAGGTCTGTTGGATGATCATAGCAGGTTCCTGGTTTGGGAGGTCTTTGGATGGCTTC

CTCCTAACCCCCATCACCATGAGCTTTCCCTTCTGCAACTCCCGGGAGATTAATCATTTC

TTCTGTGAGGCACCTGCAGTCCTGAAGTTGGCATGTACAGACACATCTCTCTATGAGACA

GTGATGTATGTGTGCTGTGTTTTGATGCTGCTGATTCCTTTCTCCGTGGTGATTGCCTCC

TATGCCCGAATCCTAACCACAGTCCACCACATGAGCTCAGTGGAGGGGAGGAAGAAAGCA

TTTGCCACCTGCTCATCTCACATGATTGTGGTTACCTTGTTCTACGGGGCCGCCATGTAC

ACGTACATGCTACCGCACTCTTATCACACACCAGCTCAGGACAAAGTTTTCTCCTTATTC

TATACCATCCTCACACCCATGCTAAACCCCCTCATCTACAGTCTGAGGAACAAGGACGTG

ACTGGGGCTCTGAGGCGGGCCTTGGGCAAGTTCAAGTCTTCACAAAGAGTGTCAGGGGAT

GCCTTTTGA

>LoafORs1.56P

ATGGATGAAGATAACAGGACCTTGTTTAGTGGCTTTACCCTCATTGGGCTCTTCCCACAC

AATAAAGCCTCAAGCTTCCTTTTTAGTTCCATTTGTGCCATCTTCTTCATGGCCATCGTA

ACTAATGGGGTCATGATCTTCCTGATCCACATAGATCCTCACCTCCACACTCCCATGTAC

TTCCTACTTAGCCACCTCTCCTTCATTGATGTGACGTATATCTCCACCATTGAGCCCAAG

ATGCTGGTTGATTATGTTTTGGGAAAGGGGACCATCTCCTTCATTGCTTGCACAGCCCAG

TACTTTCTCTACATGGACTTTGTGGGGGCGGAATTCTTCCTTCTGGAGCTCATGGCCTAT

GACCGCTATGTAGCCATCTACAACCCACTCCGCTATGCTGTCCTCATGAGCCGACGGGTC

TGTTGGGTAATCTTGGCCAGCTTTTGGTTTGGGGGTGCTTTGGACAGTTTCCTCCTCACC

CTCCTCACCATGAGCCTC/CCGTTCGGCACCTCCCACAAGATCAGTCACTTTTTCCGTGA

GGCTCCCACCATGCTGAGACTGGCTTGTGACAACAAAGCTGCCTACGAAACAGTGATGTA

TGCCTGTTGTGTCATGATGCTGCTTATCCCCTTCTCCGTGGTGATTGCTTCCTATGCCCA

GATTCTCATCACAGTGCATCAAATGAAGTCAGCAGAAGGGAAGAAGAAGGCCTTCACCAC

CTGTTCTTAGCACATAATGGTGGTGACGCTGTTCTATGGGGCTGCCTTATACACCTCCAT

GCTTCCTCAGTCCTATCACACCCCAATCAAAGATAAGATCTTCTCTGCCTTTTACACCAT

CCTCACTCCCTTGTTAAACCCTGTAATCTATAGCCTGAGGAATACGGATGTGACGGGGGC

T

>LoafORs1.57

ATGTACTCAGGGAATCAAACTTCAGAGAATCAAACATCAAGCACCTATTTCATCCTCATG

GGGCTCTTTGATCAAACTAAATATGCAGCCTTCCTCTATACCTTGATCTTTGTCCTTTTC

TTGATGGCCCTAACTGGGAATGCCCTTCTAATCCTCCTAATCCATAGGGAGCCCTGCCTT

CACACTCCCATGTACTTCTTCATCAGCCAGCTCTCCCTCATAGACCTCATGTACATATGT

GCGACAGTCCCCAAGATGCTCATGGACCAGGTTACTGGAGATTACACAATTTCCCACTTA

GGTTGTGGGGTCCAGATGTTCTCCTATCTCACCCTCGCTGGAGCTGAGGTTTTCCTCCTA

AGTGCCATGGCCTATGACCGATATGCTGCCATTTGCAGACCTCTCTATTACCCACTGCTC

ATGAACCAGAAAGTCTGCCATCTCTTCATGTCTGGATGCTGGTTCCTGGGAATGTTTGAC

GGTTTGTTGCTCACCGTAATGACCATGAGCTTACCTTTTTGTCAGTTCAGAAAAATCATG

AGCTTTTTCTGTGAGGCCCCTGCCCTGCTGAAGCTGTCCTGCTCCAACACACCCCTTTAC

GAGATGTTCATGTACCTGTGCTGTATCCTCATGCTCCTTGCCCCCATCATTATTGTATCT

GGCTCATATGTTCTCATCCTGCGCCTCATCCACAGCATAAATTCAGCAGAGGGCCGCAGA

AAGGCCTTTGCCACCTGCTCCTCCCACATGGTGGTAGTGCTGCTCTTTTTTGGTGCTGGC

ATATACACCAATATGCTCCCCAGATCCTACCACACAGGTGAGCAGGACATGACGGTGTCT

GCTTTTTACACCATCATCACCCCTGTGTTGAACCCCCTCATTTATAGCCTCCGGAACAAA

GATGTCACGGGGGCCCTGAGGAACTTGATGCTATCAGGGATGAGACCGAGGAAGTTTTAA

>LoafORs1.58

ATGAACTCAAGGAATCACACTTCAGAGAATGAAACCTCAAGCACCTATTTCATCCTTATG

GGGCTCTTTGATCAAAGTGAATATGCAGTTTTCCTCTACACCTTAACCTTTGTCTTTTTC

TTAATGGCTTTAACTGGGAACACCCTTCTCATCTTCCTGATCCACAGGGAGCCCCGTCTC

CATACACCCATGTACTTCTTCATCAGCCAGCTCTCTCTCATAGACCTCATGTACATATGT

GCGACAGTCCCCAAGATGCTCGTGGACCAGGTTACTGGAGATAATACAATTTCCCACTTA

GGTTGTGGGGTCCAGATGTTCTCCTATCTCACCCTCGCTGGAGCTGAGGTTTTCCTCCTA

AGTGCCATGGCCTATGACCGATATGCTGCCATTTGCAGACCTCTCCATTACCCACTGCTC

ATGAACCAGAGAATCTGCCATCTCTTCATGTCTGGATGCTGGTTCCTGGGCATGTTTGAT

GGTTTGTTGCTCACCCCAATGACCATGAGCTTACCTTTTTGTCAGTTCAGAAGAATCATG

AACTTTTTCTGTGAGGCCCCTGCCCTGCTGAAACTCTCCTGCTCTGATATCTCCCTCTAT

GAGATGTTCATGTACCTGTGCTGTGTCCTCATGCTCCTCATCCCCACCATGGTTATATCT

AGCTCATATGCTCTAATCCTGTGCCTCACCCACAGCATAAATTCAGCAGAAGGCTGCAGA

AAGGCCTTTGCCACCTGCTCCTCCCACATAGTGGTAGTGCTGCTCTTTTTTGGTGCTAGC

ATATATACCTATATGCTCCCCAGATCCTACCACACAGGTGAGCAGGACATGACAGTGTCT

GCTTTTTACACCATACTCACTCCTGTGCTGAACCCCCTCATTTACAGCTTCCAGAACAAA

GATGTCACAGGTGCCCTGAGGAATTTGATAAGATCAAGGATGAGATTAAGAAAAGTTTTA

AATGTGAAAACCTAG

>LoafORs1.59

ATGAAGCCCTTTATATTTCCATTATACAATCCTGGCCATTTCTCACATGTTGTATTCTCC

ATAGTGAATTTATTCAGGTTGGCATGGGAGAATCAGACCTTCAAGTCTGACTTCATCCTT

CTGGGAATCTTCAATCATAGCCCCAACCATATCTTCCTCTTCTCTCTGGTCCTGGGCATT

TTCACAGTGGCCTTCATGGGAAATACTGCCATGGTTTTCCTGATCTACCTGGACTCCCAT

CTCCACACCCCCATGTACTTCCTCCTCTGTCAACTCTCTCTCATAGACCTCATGGCTATC

TGTACCACGGTACCTAAGATGGCTCTCAACTACTTGTCTGGCAGAAAATCCATCTCTGTG

GCAGGTTGTGGAACCCAGATATTTTTCTATGTGTCCCTGCTTGGGGCTGAGTGTTTCCTG

TTGGCAGTGATGGCCTATGACCGCTATGTTGCCATTTGTCATCCATTAAGATACCCAATT

CTCATGAGCAAGAAAATCTGTGGTCTCATGGCTGCCTCTTCCTGGATTCTTGGCTCTTTT

GATGCTATAATTGAAGTTGCAGTTGCCTTGTCCTTCTCATATTGTGGTGCCCGGAAAATA

CCCCACTTCTTCTGTGATGTTCCTGCCCTTCTCCCTCTTTCATGCACTGACACCTCAACA

TTTGAAAGGATGATATTTGTCTGCTGTGTACTCATGCTTCTCTTCCCCATAGCAGTTATC

ATTGCTTCCTATACTCGTGTCCTTCTGGCTGTGATTAGCATGGAATCTGGTGAGGGTCGT

CGCAAGGCTTTCACTACATGTTCCTCCCACCTCATGGTGGTGGGGATGTACTATGGAGCA

GCCATGTTCATATACATGCGGCCCACTTCTGATCGTTCCCCAACTCAGGACAAGATGGTA

TCAGCCTTCTATACCATTCTCACTCCTATGTTGAACCCCCTCATCTATAGCCTCCGCAAC

AAAGAAGTGACCAGAGCATTCATGAAGGTATTACGGGAGGGCAAGTCTGGACAGTAA

>LoafORs1.60

ATGCCCAATTATACCATAGTGATGGAATTTCTCCTGATGGGATTTTCTGATGTTTGGGAA

CTACGGGTTTTGCATGCTGTATCCTTCTCTCTGATGTATTTCATGACTCTCATTGGGAAT

TTTCTAATTGTTATTGTCACCACTCTGGACAAGAGCCTTCACACCCACATGTACTTCTTT

CTCAGGAATCTGTCCATCTTGGATGCATGCTACATTTCTGTAATGGTCCCTAATTCATGT

GTCAACTCCTTGCTTGACAGCAGTATGATTTCAAAGGCAGGGTGTGTAACTCAAGTTTTC

CTAGTGGTTTTTTTTGCATGTGTGGAGATGCTGTTCCTCACCATCATGGCCCGTGACCGC

TATGTGGCCATCTGCCAGCCTCTCCACTACCCTGTGATCATGAACCCTCAAGCCTGTGTC

CAGATGACACTGGCTTCCATCCTCAGTGGTCTGGTCTACTCAGGATTCCACACAGGCATC

ACTTTCACACTGCCATTTTGTCAGTCCAACATTCATCAGGTTTTCTGTGACATCCCCTCT

CTGCTGAAGCTCTCCTGTTCTGACACCTTCAGCAATGAGATCATAATCCTTGCCTCTGCT

CTGGTGATTGGTGGAGGCTCTTTTGTCTTCATCATCAGGTCTTACATTCACATATTTTCT

ACGGTGCTCAGGTTCCCAAGTGGAACTGATAGAGCAAAGGCCTTTTCCACCTGCATCCCT

CATATCCTTGTGGTGTCTGTCTTCCTTAGCTCAAGCTTCTATGTGTACCTAAGGCCATCT

GCAATCTCTGCAACCATCCAGGATATGGTCCTTTCTGTGTTCTATTCTGTAATTCCCCCC

CTCTTCAACCCAATAATCTATACTCTTAGGAATGAACAAATAAAATATGCCATCAGGAAA

ATCATAAAAAAAAAAATATTTTAA

>LoafORs1.61P

ATGCCCAATTCCACCATGGTGATGGATTTTCTCCTGATGGAGTTTTCTGAAGTATGGGAA

ATACGGGTTTTGCATGCAGCATGCTTCTCTACGATGCATTTGTTGACTCTCTTTAGGAAT

TTTCTCATTTTTATTGTCACCACCCTGGACAAGAGCCTTCACATCTCCAAGTATTTCTTC

CTTAGAAATCTGTCCATTTTGGGTGCATGCTACATTTCTGTAATGGTCCCTAACTGATGT

GTTAAGTCCATGCTTGACAACAGTGACATTTCAAAGGCAAGGTGTGTGGCTCAGGTCTTC

CTAGTGGTTTTCTTTGTGTATGTAGAGCTGCTGTTCCTCACCTTCATGGCTCATGACCGC

TATGCGGCCATCAGCCAGCTTCTCCATTACTCTGGGATTATGAACCCTCAGGTCTGTGTC

CCCATGACACTGGCTTCCATCCTCAGTGGCCTGCTCTACTCAGGATTCCACACAGTCAAC

ACCTTCAGGTTACCCTTTTGTTATTCCAATGTTATTCATCAGTTTTTT

>LoafORs1.62

ATGCTCAATTCCTCCGTGATGATGGAATATCTCCTGGTGGGGTTTTCTGATGTATGGGAA

CTACGGGTTTTGCATGCCCTATCCTTCTCCCTGATATATTTAGTGACTCTCACTGGGAAT

TTTCTCATTGTTATTGTCACCACCGTGAATAAAAGCCTTCACTCTCCTATGTACTTCTTC

CTCAGGAATCTCTCCTTCTTGGATGCATGCTACATTTCTGTAACGGTCCCTAATTCATGT

GTCAACTCCTTGCTTGACAGCAGTGTGATTTCAAAGGCAGGGTGTGTAACTCAAGTTTTC

CTAGTGGTTTTTTTTGCATATGTGGAGATGCTGTTCCTCACCTTCATGGCCCATGACCGC

TATGTGGCCATCTGCCAGCCTCTCCACTACCCTGTGATCATGAACCCTCAGGTCTGTGTC

CACATGACGCTGGCCTCCATCCTCAGTGGTCTGGTCTACTCAGGATTCCACACAGGCATC

ACTTTCAGGCTGCCATTTTGTCAGTCCAATGTTATTCATCAGTTTTTCTGTGACATTCCC

TCTCTGCTGAAGCTCTCCTGCTCTGACACTTTCAGCAATGAGGTGATCATTCTTGCTTCT

GGTCTGGTGATTGGTGGAGGCTATTTCATCTTCATCATCAGGTCTTACATTCACATATTT

TCTACCGTGCTCAAATTTCCAATTGGAGCGGGCAGAGCAAAGGCCTTTTCTACCTGCATT

CCTCATATCCTCGTGGTGTTGGTTTTCCTCGTCTCAAGCTTCTCTCTGTATCTAAGACCA

TCTGCAATCTCTGCAACCAACCAGGATATGGTCCTTTCTGTGTTCTATTCCAAATTCCTC

CCTTATTCAATCCAGTTATCTACAGTCTTAGAAATGAACAAATAA

>LoafORs1.63

ATGATGGCATGGGAGAATCAGACCTTCGACTCAGAATTCATCCTTCTAGGAATCTTTGAT

CACAGCCCTACCCACATCTTCCTCTTCTCTCTGGTCCTGGGCATCTTCACAGTGGCCCTA

ATAGAAAATACTACCATGATTTTTCTCATATACCTGGACACCCAGCTCCACACCCCCATG

TACTTCCTCCTCAGTCAGCTGTCCCTCATGGACCTCATGCTGATCTGCACTACGGTACCC

AAGATGGCCTTCAATTACTTGTCTGGCAGAACAACCATTTCTGTGACAGGCTGTGCCACA

CAAATTTTTTTCTATGCATCACTACTTAGCTGTGAGTGCTTCCTGTTGACTGTAATGGCC

TATGACCGCTATGTTGCCATTTGCCATCCTCTAAGATACCCCAGTCTCATGAGCCTTAAA

GTTCGTGGACTTATGGTTGCCTCCTGCTGGATTCTGGGATCTTCCGATGGTGTCATTGAT

GCTGCAGCAACATTTTCTTTCTCCTATTGTGGGTCCCGGGAAATAGCTCACTTCTTTTGT

GATTTCCCTTCTTTGCTAAGCCATGCATGCAACGACACATCAACATTTGAAACGCTTCTG

TTTATCTGCTGTATAGTAATGATTGTTATCCCTGTAGTAATCATCATTGTTTCCTATACT

AGAGTCCTTCTGGCTGTCATTCGCATGGGATCTGGGGAGGGTCGCCACAAAGCTTTCACC

ACCTGTTCCTCCCACCTCATGGTAGTTGGAATGTACTACGGAGCAGCCTTGTTTGTATAC

ATCCGGCCCACTTCTGATCATTCCCCCACCCAGGACAAGATGGTGTCCATCTTCTACACC

ATCTTTACGCCCATGCTTAATCCTCTCATCTACAGCCTCCGCAACAAAGAAGTGACCAGA

GCGTTCATGAAGGTATTAGGGAAGGGCAAGTCTGGAGAGTAA

>LoafORs1.64

ATGGGGTGGGGAAATGAGAGCTTCCACTTCGAATTCATCCTTCTTGGAATTTTTGATCAC

AGCCCCACCCATACCTTTCTCTTCTCTCTGGTCCTGGCCATCTCCGCAGTGGCATTCATG

GAAAACACTGCAATGGTTCTTATCATCTACTTGGACCCCCAGCTTCACACCCCCATGTAC

TTCCTCCTCAGCCAACTCTCTCTCATGGACCTAATGCTCGTTTGCACCACGGTACCCAAG

ATGGCCTTCAACTACTTATCTGGCAGGAAATTTATCTCTCTGGAAGGCTGTGGAACTCAG

ATACTTTTCTATGTGTCCCTTCTTGGAGCTGAATGCTTCCTACTGGCTGTCATGGCCTAT

GACCGCTATGTGGCTATATGCCACCCTCTTCGATACACTATCCTCATGAATCAGAAACTC

TGCATGCTCTTGACTGTTGCTTCCTGGATTCTAGGCTCTCTTGATGGCATCATTGTGCTT

GCAGCTGCCCTGTCTTTCCCTTACTGTCACTCTCTGGAAATCCATCACTTTTTCTGTGAT

GTTGCTGCCCTTCTGCCACTATCTTGTACAGACACCTCCGCATTTGAAAGACTTCTTTTC

ACCTGCTGTGTGGTGATGCTAATCTTGCCAGTTTCAGTTATCATCATTTCCTATTCCTGT

GTCCTCCAAGCTGTCATCCACATGGGCTCTGGGGAAAGTCGCCACAAGTCTTTCACCACC

TGCTCCTCTCACCTGTCTGTGGTTGGACTGTACTATGGTGCTGGCATGTTCATGTACATG

AGACCAGCTCCCAACCATACACCAAACCAGGACAAGATGGTGTCAGCCTTCTACACCATC

CTCACTCCCATGCTGAACCCCCTCATTTACAGCGTCCGCAACAAAGAGGTATCCCAGGGA

CTTAAGAAGTTATTGGGGAAAGGAAGCCTAATATAA

>LoafORs1.65

ATGGAAAATTATAACCAAACATCAACTGATTTCATCTTATTAGGGTTGTTCCCACCATCA

AAAATTGGCGTATTCCTCTTCATTCTCATCATTCTAATTTTCATAATGGCTCTGATTGGC

AACCTATCCATGACTCTCCTCATTTTCTTGGACACCCATCTCCATGCACCCATGTATTTC

CTACTTAGTCAACTCTCTCTCGTGGACCTGAATAACATCTCCACCATTGTCCCCAAGATG

GCTTCCAACTTCCTGTTTGGAATCAAGTCAATCTCCTTCATTGGATGTGGAGTTCAGAGT

TTCTTCTTCTTGACTTTGGCAGGTGCAGAAACACTTCTCTTGACATCTATGGCCTATGAC

CGTTACATGGCCATTTGCTTTCCTCTCCATTATCCCATTCGTATGAGCAAAAAAGTGTGT

GTGCTGATGATAACAGGATCTTGGATAATGGGGTCTATCAACTCCTGTGCCCACACTGCA

TATGCACTCCATATGCCCTATTGCCAATCTAGGGCCATCAATCATTTTTTCTGTGATGTC

CCAGCCATGTTGACTTTGGCTTGCATGGACACCTGGGTCTATGAGTACACAGTGTTTGTG

AGTACCACCTTGTTCCTCGTGTTCCCTTTCATTGGCATTAGTTGTTCTTATGGCCAGATT

CTCCTTGCTGTCTACCACATGCCCTCATCAGAAGGGAGGAAGAAGGCCTATTCGACCTGC

AGTACCCACCTCACTGTGGTGACCTTCTACTATGCACCCTTTGTTTACACTTACCTATGC

CCAAGAGCCTTCCGATCTCCAACAGAAGACAAGGTTCTGGCTGTTTTCTACACCATCATC

ACCCCTACGCTCAACCCCATTATCTACAGCCTGAGGAACAAGGAGGTGATGGCGGCCCTA

AGGAGAATCATTCAGAGAATTGTCTTTGTGAAAGCATAG

>LoafORs1.66P

GAGAATTATAAAGAAACATCAACTGATTTCATTTTATTAGGGCTGTTCCCACAAACAAGA

ATTGGCCTGTTCCTCTTCATTCTCATTGTTCTCATTTTCTTAATGGCTCTAATTGGCAAT

CTGTCCACGATCCTTCTAATTTTCTTGGACGCCCATCTCCACATAGCCATGTATTTCCTA

CTTAGTCAGCTCTCCCTCATGGACCTGAATTGCATCTCCACCATTATCCCCAAGATGGCT

TCCAACTTCCTATTTGGAATCAAGTCAATCTCCTTCATTGGATATGGAGTTCAGAGTTTC

TTCTTCTTGACTTTGGTAGGTGCAGAAGCAATTCTCTTGACATCTATGGCTTATAATCAT

TATTTGGCCATTAGGTTTCCTCTCCACTATCCCATTTATATGAGCAAAAAAGTGTATGTA

CTGATGATAACAGGGTCATGGATAATGGGGTCTGTCAACTCTTGTGCCCACACTGCATAT

GCACTCCATATCCTCTATTGCCAATCCAGGGCCATCAATCATTTTTTCTGTGATATCCCA

GCCATGTTGACTTTGGCTTGCATGGACACCTGGGTCTATGAGTACACAGTGTTTGTGAGT

GCCACCTTGTTCCTCATGTTTTCTTTCATTGGCATTACTTGTTCCTATGGCCAGATTCTC

CTTACTGTCTACCACATGCCCTCATCAGAAGGGAGGAAGAAGGCCTATTCGGCCTGCAGT

ACCCACCTTACTGTGGTGACCTTCTACTATGCACCCTTTGCTTACACTTATCTATGCCCA

AGATCCTTCCAATCCCCAACAGAAGGCAAGGTTCTGGCCATTTTTATACCGTGCTTACCC

CCATGCTCAACCCTGTCACCT

>LoafORs1.67

ATGGAGAAGAGAAATGCCACTTCAGATTTTATTCTCTTGGGACTCTTTCAGCACACTAGC

TTCCACCTCTTCCTCTTCATCGTGGTGCTGATAGTAGCCATTGCTTCCCTGGTGGGCAAT

GCCCTCACAATCCTCCTGATTCACTGGGACCACCGGCTTCACACACCCATGTACTTACTG

CTGAGCCAACTCTCCTTCATGGACACGATGCTGGTTTTCACCACTGTGCCCCAAATGGCA

TCTGGTTTTCTGACAGGCAAGAAGTCCATCTCCCCTGCTGAATGTGGGTTACAGATCTTT

GCCTACCCCACCTTGGGTGGTGGAGAGTGCTTCCTCTTAGCAGCCATGTCCTATGACCGC

TATGTGGCAGTGTGTCATCCACTACGATATAACATTCTCATGAACTGGCAACTGTGCCTG

AGAATGACCTTAGGGTCTTGGTTTCTGGGGGCAGCTGATGGTCTCGTGCAGGCAGTGGCT

ACCCTGAGCTTCCCTTTCTGCAGTGCTCATGAGATTGATCATTTCTTCTGTGAGGCCCCC

TCACTGCTGCGTTTGGCTTGTGCTGACACTTCAGTCTTCGAAAATGTCATGTACATCTGT

TGTGTGATAATGCTCCTTGTGCCTTTATTTCTCATCCTGATATCCTACAGTCTCATCCTA

GCTGCAGTTCTCCACATGCCTTCTACAGAAGCCCGCAAGAAGGCCTTTGCCACGTGCTCG

TCACACTTGACTGTGGTGGGACTGTTTTATGGGGCTGCCATTTTTACCTATATGAGACCA

AAGTCCTACAGATCAGCTAACCATGATAAGGTTGTGTCAGCTTTCTATACCATCTTCACA

CCTGCATTGAACCCCCTCATTTATAGTCTGAGGAACAATGAGGTGAAAGGAGCCTTGAAA

AGGTGGCTTGGGAAATGCACTAACTTAAAACATCAATAA

>LoafORs1.68

ATGATGGGATTTGAGAATCAAACTTCCGGCAGTCACTTGATTCTCTTGGGACTGTTCCCT

TCTTCCCAAAAAAGTCTGGCGTTCTTCTTCTTTATATGTATCATTTTTGTTATGACTGTA

ACAGAAAACATAGTCATGATCCTCCTTATCCACAGGGACTTACGACTCCGTACTCCTATG

TATTTCCTGCTCAGTCATCTCTCTTTCATGGACATCTTGCATATTTCTAACATTGTTCCT

AAAATGATTGTTGACTTTCTGACACGCAACAGAACAATTTCATTCACAGGTTGTGGTTTC

CAAGTATTTCTCTCCCTCACTCTCCTGGGTGGTGAGTGCCTTCTCCTGGCAGCAATGTCC

TATGATCGCTATGTAGCCATCTGTCACCCACTACGTTACCCCATTCTTATGAATGAGCAA

ATCAGCATTCTCATGGCTGGTGGGTCCTGGCTTGTGGGGACAATCAACTCCACAGTTCAC

ACAGCTTACATCCTCCACTTTCCCATCTGTGGTTCAAGGGCTATCGATCACTTTTTTTGT

GAAATCCCAGCCATGTTGAAGTTGTCCTGTGTAGACACATCACACTATGAAGGAGGTGTT

CATGTAAGTGGTATCATCTTCCTGGTAATCCCTTTTTCTATGATCTTTGCTTCTTATGTC

CAAGTTCTCCTTACCGTCCTCCAAATGAAATCAACAAAAGCACAGAAAAAGTCATTTTCT

ACCTGTTTCTTCCACATGATTGTAGTCATGATGTACTATGGGCCATTTATTTTCACGTAT

ATGAGACCAAAGTCCTACCACACTCCAGGTCAGGATAAGTTCTTAGCAATATTCTATACC

ATCCTCACACCTACGCTGAACCCTATCATCTACAGCTTTAGAAATAAAGATGTTCTGGCA

GCAATGAAAACTATGATTGAAAGTAACTTTCTGCCTAAAAGATGA

>LoafORs1.69P

ATTGTCTTCATCTCCCTGATGGGCAATGCCCTCATGATTCTCCTGATTCACATGGAGCAC

AGGCTCCACATACCCACATACTTTCTAGTGAACAAATTCTCCCATATGTACATCATGCTG

GTTTTTACCATCATGCCCCAAAACAAAACAAAACAACAAATTTTTTTTTTTTTTTGCCAA

AAATGGCTACTGACTATTTGACTGGAAAGAAGCCTACCTCTCCTGCAGGCTGTGGGTTAC

AGATCTTTTTCTTCCTCACCTCGTGTGGCGAAGAGTTCTTGCTCTTAGAACCTACGTCCT

ATGACCACTATGTGGCACTGTGTCACCCACTACCATATTCCATTCTCATGAACTGGCAAC

TGTGCCTTAACAATTGCCATGGGGTCTTGGTTTCTGGGGGAAGCTGACAGTCTCATGCAG

GTAGTTGCTAACCTGAGCTTCCAATTTTGCAAAACACATGAGATCAATCATTTCTTTAAA

GAGGCTCTCACACTGGTACACTTGGCTTGTGGTAACATCTCTGTCTTTGAGTATGTCATG

TCTATATGCTCTGTGTTAATGCTCCTGGTGCCATTCTCCCTCATCCTGACCTCCTACAGT

CTCATCCTAGCTGCTGTTAATCACTATGTTCTACACAAGCCCGCAAGAAGGCCCTTGGCA

TGTGCTCATCACACTGGGCTGTAATGGGACTCCTATTGGGCTGCTATTTTTATCTACATG

AGACCCAAATCATATAAGTCAGCTAACCATACTAAGGTTGTGTCAGCTTTCTATACTATC

TTCACCCCTGTGCTGAAACACTTTAGCTATATTCTAAGGAAAAGCGAGGTCAGAAGAGCT

CTGAAAATGTGTATGGGT

>LoafORs1.70

ATGGAGAAGAGGAATGCCACTTCAGATTTTATTCTCCTGGGACTCTTTAAGCACACAACG

TTCCACCTCTTCCTGTTCATTGTGGTGTTGACCATAAGTATGGCTTCCCTGATGGGGAAT

GCCCTCATGATTCTTCTGATTCACAGGGACCACCGGCTGCACACGCCCATGTACGTTCTA

CTGAGCCAACTCTCCCTCATGGACATGATGCTGGTTTTCACCATTGTGCCCAAAATGGCA

TCTGGCTTTCTGACAGGCAAGAAGTCCATCTCTCCTGCAGGCTGTGGATTACAAATCTTT

GTCTCACTCACCCTGGGTGGTGGAGAGAGTTTTCTCCTGGCAGCCATGTCCTGCGACCGC

TATGTGGCTGTGTGTCACCCACTGAGATATTCCATCCTCATGAACTGGCAACTGTGCTTG

CAAATGACCATGGGGTCTTGGTTCATGGGGGCTGCTGATGGGCTCATGCAGGCAGTTGCT

ACCCTGAGCTTCCCATTCTGCAGTGCACATGAAATCAATCATTTCTTTTGTGAGGCCCCC

ATGATGGTGCGCTTGGCCTGTGCTGACACTTTAGTCTTCGAAAATATCATGTACATCTGC

TGTGTGTTAATGCTCCTCGTGCCCTTCTCCCTCATCTTGATCTCCTATAGTCTCATCCTG

GCTGCAGTTCTCCACATGCATTCTACAGAAGCCCGCAAGAAGGCTTTTGCCACGTGCTCA

TCACACTTGACTGTGGTGGGACTCTTTTATGGGGCTGCCATTTTTATCTACATGAGACCA

AAATCCTATAGGTCAGCTAACCACGATAAGGTTGTGTCTGCCTTCTATACTATTTTCACC

CCTGTACTGAACCCCCTCATCTATAGTCTGAGGAACAATGAGGTGAAGGAAGCCTTGAAA

AGGTGGCTTGGAAAATGCACTAACTTAAAACCTCAATAA

>LoafORs1.71

ATGGAGAAATGGAATCAAACTTCAAATGATTTCATTTTGTTGGGACTTCTTCCCCCAAAT

CAAACTGGCATGCTGCTCTTGTTCCTTATCCTCCTTGTATTCTTTCTGGCCTCATTGGGA

AACTCAACCATGATGTACCTCATTTGCATGGATTCCCGACTCCACAAACCCATGTACTTT

CTTCTCGGCCAGCTCTCCCTCATGGACCTGATGTACATTTCTACTACAGTCCCCAAGATG

GTACACAACTTCCTCTCTGGCCACAAAGGCATCTCTTTCCTTGGATGTGGCTTTCAAAGC

TTCTTATTCTTGACAATGGCTGGTTCTGAAGGCTTACTCTTAGCCTCCATGGCCTATGAC

CGTTACGTTGCCATCTGTCACCCCCTCCATTATCCCAACCGTATGAGTAGAAGGATGTGT

GTCCAGATGATCATGGGATCTTGGGTCTTGGGATCCATCAACTCCTTGGCACACACAGTC

TATGCTCTTCATATTCCTTACTGCCAGTCTAGAGCCATTGATCATTTCTTTTGTGATGTC

CCAGCCATGTTGCTTCTTGCATGTATGGACACCTGGGTCTATGAGTACATGGTTTTTGTG

AGCGTTACCCTCACGCTCCTCCTTCCTTTCCTTGGCACCACTGCTTCCTATGGCAGAGTA

CTTTTGGCTGTCTACCATATGCGCTCCAAAGAGGGAAGGAAAAAGGCCTTCTCCACCTGT

TCAACACATTTAACTGTAGTTACCCTTTATTATGCACCATTTGTTTACACCTATCTTCGG

CCCAGGAATGTCCGCTCATCAGCAGAAGATAAGATTTTGGCCATTTTTTACACCATCCTG

ACCTCCATGCTCAATCCCATTATCTACAGCCTGAGGAATAAGGAAGTCCTGGGGGCCATG

AAAAGAGTGTTTGGAGTATTCTTTTCTGAGAAAAAATAG

>LoafORs1.72P

ATGGAGAAATGGAATCAAACTTCAAATGATTTCTTTTTGTTGGGGCTTTTCCCCCCAAAT

CAAACTGGCATGCTGCTCTTGTTCTTTATCATCCTTGTACTTTTTCTGGCCTCTGTGGGT

AATTCAGCCATGATTCACCTTATCCACGTGGATCCCCGTCTCCACTCACCCATGTACTTT

CTCTTCAGCCAGCTCCTCATGGACCTGATGTACATCTCTACCATCGTCCCCAAGATGGCG

CTCGACTTCCTCTCCTGCCAGAAAGGCATCTCTTTCTTAGAATGTGGTATGCAAAGCTTC

TCCTTCTTGACAATGGCCTGTTCTGAAGGCTTACTCTTGGCCTCCATGGCCTATGACCAT

TAAGTGGCCATCTGTCACCCTCTCCATTATCCCAGCTGTATAAGTAGAAGCACGAGTGTC

CAGATGATCATAAGATCGTGGATCTTGGGGTCCATCAACTCTTTAGCACACACAGCCTAT

ATCCTTCATATTCCTTACTGCTGGTTCAGGGTCATTGGTCATTTCTTTTGTGATGTTCCA

GCCATGGTGTCTCTTGCATGTGTGGACACCTGGGTCTATGAGTGCATGGTTTTTGTGAGC

ACTAGCCTCTTTCTCCTCCTCCCTTTCCTCAGCCTCACTGCTTCCTATGGCAGAGTCCTT

TTGGCTGTCTACCATATGCGCTCCAAAGAGGGAAGAAAAAAGGCCTTCACCACCTGTTCA

ACACATTTAACTGTAGTCACCTTTGACTGTGCACCATTTGTGTACACCTGTCTTCGGCCC

AGGAATCTCCGCTCACCAGTAGAAGATAAGATTTTGGCCATTTTTTACACTATCCTCACT

>LoafORs1.73

ATGGAGAAATGGAATCAAACTTCTAACGATTTCATTTTGTTGGGGCTTTTTCCCGCAAAT

CAAACTGGCATCCTGCTCTCGTTCCTCACCATCCTTGTATTCTTTCTGGCCTTGTTGGGA

AACTCAACCATAATTTACATCATCTGTGTGGATCCCCGTCTCCACACACCCATGTACTTT

CTCCTTAGCCAGCTCTCACTCACAGACCTGATGTACATCTCTACTACCGTCCCCAAGATG

GTGCATAACTTCCTCTCTGGCCAGAAGAGCATCTCTTTCCTAGGATGTGGCTTTCAAAGC

TTCTTCTTCTTGACAACAGGCGGTGCTGAAGGCTTACTCTTGGCCTCCATGGCCTATGAC

CGTTACGTGGCCATCTGTCACCCCCTCCATTATCCCAACCGTATGAGTAGAGGGATGTGT

GTCCAGATGATCATAGGATCTTGGATCTTGGGGTCCATCAACTCTTTGGCACACACAGCC

TATATCCTTCATATTCCTTACTGCCAGTCCAGGGCCATTGATCATTTCTTTTGTGATGTC

CCAGCCATGGTGTCTCTTGCATGTATGGCTACCCGGCTCTATGAGTACATGGTTTTTGTG

AGCACTAGTATCTTTCTCCTCCTTCCTTTCCTTGGCATCACTGCTTCCTATGGCAGAGTC

CTTTTGGCTGTCTACCATATGCGCTCCAAAGAGGGAAGAAAAAAGGCCTTCACCACCTGT

TCAACTCATTTAACTGTAGTTACCTTATACTATGCACCATTTGTGTACACCTATCTTCAG

CCCAAGAATCTCCGCTCACCAGCAGAAGATAAGATTTTGGCTGTTCTTTACACCATCCTC

ACTCCCATGTTCAATCCCATTATCTACAGCCTGAGGAATAAGGAAGTCCTGGGGGCCATG

ACAAGAGTGTTTGGAATATTCTCTTCTAAGAAAGAATAG

>LoafORs1.74

ATGGAGAAACGGAATCGAACTTCTAACAATTTCATTTTGTTGGGGCTTTTCCTCCCAAAT

CAAACTAGCATGCTGCTCTTGTTCTATATCATCCTTGTATTCTTTCTGGCCTTGGTGGGA

AACTCAACCATGATTTACTACATTTGCTTGGATTCCCATCTCCACACACTCACGTACTTT

CTCCTCAGCCAGCTCTCCCTCATGGACCTGAACTGTATTTCTACCACAGTCCCAAAGATG

GTTTTCAATTTCCTTTCTGGTCATAAAGGAATCTCTTTTCTAGGGTGTGGCATTCAAAGC

TTCTTGTTGTTGACAATGGCCAATTCTGAAGTCTTACTCTTGGCCTCCATGGCCTATGAC

CATTATGTGGCCATCTGTCATCCCCTCTGTTATCCCAACCTTATGAATAGAAGAACATGT

GTCCAAATGATCATAGCGTCTTGGATCTTGGGATCCATCAACTCCTTGGCACACACAGTC

TATGCTCTTCATATTCTTTACTGCCAGGGTAGAGCCATTGATCATTTCTTTTGCGATGTC

CCAGCCGTGTTGCCTCTTGCATGTATGGACACCTGGGCCTATGAGTACACGGTTTTTGTG

AGCACTAGCCTCTGTCTCCTCCTTCCTTTCCTTGGCATCACTGCTTTCTATGGCAGAGTC

CTTTTGGCTGTCTACCATATGTGCTCCAAAGGGGGAAGCACAAAGGCCTTCACCACCTGT

TCAACTCATTTAACTCTAGTTACTTTGTACTATGCACCTTTTGTCTACACCTATCTTCGG

CCCAGGAATCTCTGCTCATCAGCAAAAGATGAGATTTTGGCCTTTTTTTACACCATCCTC

ACTCCCATGCTCAATCCCATTATCTCCAGCCTGAGGAATAAGGAAGTCCTGGGGGGCCAT

GAAAAGAGTGTTTGGAGTATTCTCTTCCAAGAAAAAATAGTCATGGCTCTCCTTATTGCA

CTCTTTTTTTTCCTTTTTCATGTTGAGAAGAACATCCTAGTGCTGTTCAATAGAAATATA

ATAGAAGACACACACATAATTTTAACTTTTATAGTATACACATTGGAAACCCTGGTGGCA

AAAGGTCAGCAGTTTGAATTCATTCAGGTGCTCCTGGGGAACTCTATGGAGCAGTTCTAC

TTTGTCCTATAG

>LoafORs1.75

ATGGAGAAATGGAATCAAACTTCTAATGATTTCATTTTGTTGGGGCTTTTTCCCCCAAAT

CAAACTGGCCTGCTCCTCTTGCTCCTTATCATCCTTGTATTCCTTCTGGCCTTGATGGGT

AACTCAACCATGATCCACCTCATCTGCACGGATCCCCATCTCCACACACCCATGTATTTT

CTCCTCAGCCAGCTCTCCCTCATGGACCTGATGTGTATTTCTACCACAGTTCCAAAGATG

GTGTACAACTTCCTCTCTGGCCACAAAGGCATCTCTTTCCCAGGATGTGGCACCCAAAGC

TTCTTGTTCTTGACAATGGCTGGGTCTGAAGGCTTACTCTTGGCCTCCATGGCCTATGAC

CGTTATGTGGCCATCTGTCGGCCCCTCCATTATCCCAACCTTATGGGTAGAAAGATGTGT

GTCCAGATGATGGTAGGATCTTGGATCTTGGGATCCATCAACTCCTTGGCACACACAGTC

TACGCCCTTCATATTCCTTACTGCCGGTCCCGGGCCATTGATCATTTCTTTTGCGATGTC

CCAGCCATGTTGCCTCTTGCGTGTATGGACACCTGGGTCTATGAGTACATGGTTTTTGTG

AGCACTAGCCTCTTTCTCCTCCTTCCTTTCCTTGGCATCACTGCTTCCTATGGTAGAGTA

CTTTTGGCTGTCTACCATATGCACTCCAAAGAGGGAAGGAAAAAGGCCTTCACCACCTGT

TCAACTCATTTAACTGTAGTTACTTTGTACTATGCACCATTTGTCTACACCTATCTTCGG

CCCAGGAATCTCCGCTCACCAGCAGAAGATAAAATTTTGGCCTTTTTTTACACCATCCTC

ACTCCCATGCTCAATCCCATTATCTACAGCCTGAGGAATAAGGAAGTCCTTGGGGCCATG

ACAAGGGTGTTTGGAATATTCTCTTCCAATAAAGAATAG

>LoafORs1.76

ATGGAGAACAGAAATGCCACTTCAGATTTTATTCTCTTGGGACTCTTTCAGCACACTAGC

TTCCACCTCTTCCTCTTCATTGTGCTGCTGACAATAGCCATTGCTTCCCTGATGGGGAAT

GCCCTCATGATCCTCCTGATTCACAGGGACCACCGGCTTCACACACCCATGTACTTACTG

CTGAGCCAACTCTCCTTCACGGACACGATACTGGTTTTCACCATTGTGCCCAAAATGGCA

TCTGGCTTTCTGACAGGCAAGAAGTCCATCTCCCCTGCTGAATGTGGGTTACAGATCCTT

GCCTTCCTCACCTTGGGTGGTGGAGAGTGCTTCCTCTTGGCAGCCATGTCCTATGACCGC

TATGTGGCAGTGTGTCATCCACTACGATATAACATTCTCATGAACTGGCAACTGTGCCTG

AGAATGACCTTAGGGTCTTGGTTTCTGGGGGCAGCTGATGGTCTCGTACAGGCAGTTGCT

ACCCTGAGCTTCCCTTTCTGCAGTGCTCATGAGATTGATCATTTCTTCTGTGAGGCCCCC

TCACTGCTGCATTTGGCTTGTGCTGACACTTCAATCTTCGAACATGTCATGTACATCTGT

TGTGTGGTAATGCTCCTCGTGCCTTTATTTCTCATCCTGACCTCCTACAGTCTCATCCTA

GCTGCAGTTCTCCACAAGTCTACAGAAGCCCGCAAGAAGGCCTTTGCCACGTGCTCGTCA

CACTTGACTGTGGTGGGACTCTTTTATGGGGCTGCCATTTTTACCTATATGAGACCAAAG

TCCTACAGATCAGCTAACCACGATAAGGTTGTGTCAGCTTTCTATACTATCTTCACTCCT

GCGTTGAACCCCCTCATTTACAGTCTGAAGAACAATGAGGTGAAAGAAGCCTTGAAAAGG

TGGCTTGGGAAATGTATTAACATAAAACATCAATAA

>LoafORs1.77

ATGCATTTGGAGAACCACACAGTCACTGAATTTATCCTTTTAGGTCTGCTTCAATACACC

CCAGCTCACTTCTGTCTGTTTGCCCTCTTCACTATGATGTTCCTTGTTACCCTGATTGGA

AACAGTCTCCTGATTCTGCTAATCCTGGTAGACCCCCACCTTCATACTCCTATGTATTTG

TTTCTGTGGCAGCTGTTTCTCATAGACACCTTGTTCACACTTGCCGTTGTCCCCAAGATG

TTGATAGACTACCTTCTGCACAGGACAGTCACCTCTGTTTCTGGATGTGGGATCCAGATA

TTCCTGGGGTTAGGCCTGGGAGGGACTGAGTGTATCCTCTTAGGCCTTATGTCCTATAAC

AACTATGTTGCCATCTACAAGCCCCTACACTACCCTCTCATTATGAACTGGCCCTTCGGC

CAGCAGATTGCTGTTAGCTCATGGACCAGTGGTTCTATTGATGCCTTGATATATACAGTC

TACATCACGAGTTTCCACATTTGGGGAAACAGAGAAATTCATAATTTTTATTGTGAACAT

CCCGGAGTCTTGAGACTCTCCTGTGAGGACACCTTGTCCTATGAGACTGGGGAGTTGATC

AGCACCACCATTCTGCTTGTTATTCCATTTTCAGTCATCCTTGCTTCATACTTGCTCATC

CTGATCACTCTTATTCAAATGGCTTCCACTGAGGGACAGAAGAAAGCATTCTCCACTTAT

TCCTCTCACTTGACTGTGGTCAGTCTATATTATGGTGCCACCATTTTCATATTCAAAATG

TCTAAATCTTTACCTACACTTATCTTTGCTCACAACTCTTCCCATTCTGAATCCATTACC

TTTCCCCACTTTGTTGCTGTTGTTAGGTGCCGTTGA

>LoafORs1.78P

TTTAATCTCTTGGAACTGTTCTCTTCTTCCCAAACAAGTCTGGTGTTCTTCTTCATTACA

TGTATCGTTTTTGTTATGACTGTAACAGAAAATGCAGTCATGATCCTCCTTATCCATAGG

GACTTATGACTCCATACTCCTATGTATTTCTTGTTCAGCCATTTCTCTTTCATAGACATC

TTGCATATTTCTAACATTGTACCTAAAATTGTTGCTGACTTTCTGTCAGGGAACAGAACA

ATTTCATTTGCAGGTTGTGCTTCCAGATATTTCTCTCCCTCATTCTCCTAGGTGTGAGTG

CTTCCTCCTAGCAGCAATCTCCTATGATCACTATGTTGCCATCTGTCACCCACTGAGCTT

CCCCATTCTTACGGATGAGATGTCCAGCATTCTCATGGCTGATGTATTCTGCTTGTGGGG

ACAATCACTCACAGGTTCAACAAACTTATGGCACTCCCCTTCTCTGCTCACAGCATTGAT

CACTTTTTTTGTAAAGTTCCCAGCCATGCTGAAGTTGGCCTGTGTAGACAGATCACACTA

GGAAAGAGGTGTTTATGTAAGTGGTATCATCTTCCTGGTCATACCTTTTTCCATGATCTT

TGCTTCTTATATGAAAGTTCTCCTTACCGTCCTCCAGATGAAATCATCACAACACGGAAA

AAGTCATTTTCTACCTGTTCCTTCCACATGATTGCGGTCATGATCTACTATGGGCCATTT

ATTTTCACATATATGAGATCAAAGTCCTACCACACTCCAGGCCAGAATAAGTTCTTGAGA

ATATTCTACATCATTCTTACACCTACACTCAACCCTATCATCTACAGCTTTAGAAATTAA

GATGTTCTGGCAGCAATGAAAACTATGCTTGAAAGTAACTTTCTGCCTAAAAGA

>LoafORs1.79P

AGCCCCGTGTATTTCTTCCTGAAGAATTTGTCCTTAATTGACATGTGCTATATCTCTGTC

ACTGTCCCCAAGTCCATCATGAACTCTGACTACCAGCTATTCAATTTCCTTCCTAGGATG

TGCCTCATGGGATTTTTTTTTTTTTTGTAATGTTTTTTCGTGGGCACAGAGTATGCCCTC

CTTATAGTCATATCCTATGACTGCTGTGGTGCCAGCTGCCATCCTCTGTACTATGAGACT

GTTATGAATAGAGGTGTCTGTGTGCAGATGGGGTGCAGCGGATGTGTCTATGGATCTATT

CATGCAGCAAGTACACTCTCTGTCAACTTCTGTGGGCCCAAAGTAGTTCATCGGTTTTTC

TGTGATAGTCCATCATTGTTTACACTCGCTTGTTCTGGGGAGCATATTTTAGAACATTCG

TTTATCATTGCTGGCTGTTGTTTTGCTTTTGTATGTTTCATTTTAATGGCTGTTTCCTAT

GTTCACATTTTCTCATCTGTCTTAAGGATCCCATTCACTCAAGGAAGGTACAAAACTGTC

TCCACCTGCATGTCCCACCTCACTGTGGTGACCTTGTTTCTTTCTTCTGGATTTATGGGG

TTTTTAGGTTCAGCCTCTGAATCCCCATCCTCAGTGAACCTCTTTATGTCTGTGTTATAC

TCCTTGTTATCTCCTACTCTGAATCCTGTCGTTTACAGTTTGAGAAACAGGAACATAAAG

ATTGCCCTTAGCAAAATCCTCCATGGAAAAATGGCCTTAAAG

>LoafORs1.80

ATGCCTGAGGAACGAGCCAACACAACCATCATAATGGAATTCTTGCTCGTGGGATTCCCT

GATGACTGGATGCTACAGAGAATGTATGCCACCCTCTTCTTCCTCATTTACCTCACAGCA

CTGATGGGGAACCTCCTCATTATCACCCTCACCACCACTGATGGGCGTCTCCATTCTCCC

ATGTATTTCTTCCTGAAGAATTTGTCCTTGATTGATATCTGCTACATCTCTGTCACTGTC

CCCAAGTCCGTCGTGAACTCTCTGACTAAGAGTCATTCTATCTCCTTCCTAGGATGTGCC

TCACAAATTTTTTTTTTAATTTTTTTTGCTGGCACAGAGTATGCCCTCCTTATAGTCATG

TCCTATGACCGCTATACTGCCATCTGCCATCCTTTGCACTATGAGACCACTATGAATATA

GGCGCCTGTGTGCAGATGGTGACTGCATCGTGGCTCAGCGGGTGTGTCTATGGATCTATC

CATGCAGCAGGTACATTCTCTGTCGATTTCTGTGGACCTAAAATAGTGCACCAGTTCTTC

TGTGACGTTCCATCACTGCTTACACTTGCTTGTCCTGGGGAACAAATTCTAGAATATGCA

TTTATAATTGCCAGCTTTTCGTTTGCCTTTTTATGCTTCCTTTTCATAATTACCTCATAT

ATTCATGTTTTCTCAGCTGTCTTAAGGATTTCATCTGCTCAAGGCAAGTTCAAAACTGTC

TCCACCTGCATGCCCCACCTCACTGTGGTGATCTTGTTCCTCTTTTCTGGCCTTGTTACA

CATTTAGGTACAAACTACAAATCTACATCATCACTGAATCTGCTCATGTCTGTATTATAC

TCTATGTTACCTCCCATCTTGAATCCTGTTATATATAGCCTGAGGAATGAGGATATGAAG

TTAGCCCTAGGCAAATTACTGGGTGGTAAAATGTTGCCAAAGACATAA

>LoafORs1.81P

ATGTATGAAAAATTTACCAACATGACCATCATGATGGAATTCTTGCTCATGGGATTCCCT

GTTGACTGGGTGATAGAGACACTCCATGCAGCACTATTCTTCCTCATTTACCTGGCACCA

CTAATTGGAAACCTCCTTATTTTCACCCTCACCATCGTAGACCAGCACCTCCAAACCCCT

ATGTATTTCTTCCTGAAGAATTTGTCCTTAATTGATATCTTCTACATCTCTGTCACTGTC

CCTAAGTCCATCAAGAATTCCCTAACCAACAGTTATTCCATTTCCTTCCTGGGATGTGCG

TTACAGCTTTTTCTTGTTATTTTTTTCAGAGGCACAGAGCTTGCCCTCCTTGTAGTCATG

TCCTATGACTGCTATGTTGCCCTCTGCCATCCTCTGCACTATGAGACCCTTATGAATAGA

TGTGCCTGTTTGTAGATGGTGACTGCATTGTGGCTCAGTGGATGTGGCTATGGAGCCATT

CGTGTAGCAGGTACACTCTCTGTCAATTTCTGTGGGCCCAACGTAGTGCATCGGGTCTTC

CGTGATGTCCCATCACTGCTTATACTCACTTGTTCTGGGGAGTATATTTTAGAATAAGCA

TTTATCATTGTTAGCTGCTTTTTTTTTGTATGTTTTATTTTAATGGTTGTTTCTTATATT

CACATTTTTTCCACCTTTCTCAGAATCCCATCTGCAAATGGCAGAGTGAAAACTTTATCC

ATCTGCATGCCCCACCTCACTGTGGAGACATTGTTCCTCTTTGCAGGGAGTATTACATAT

TTAGAAAAAAATTTCAACTCTTCATTTTCACTAAAAATGTTGATATCTGTGCTTTACACT

GTATTACCACCCACTCTTAATCCTCTCATCTATAGCCTGAGAAACAAGGACATGCAGATG

GCCCTAGAAAAATTGATAGCTGGCAAAATATTGTGAATCTTT

>LoafORs1.82

ATGGATGTGACAAACCAAACGACAGTAAGGGAGTTCATCTTTCTTGGGTTTTCTGCTGTT

CCCCAACTGCGGCTCACATTATTTGTCGTGTTTCTCATTGTGTACCTACTTTCCCTTGTG

GGAAATACACTCATCATTTTCATTGTTCTGATGGACTCCGCACTCCACACACCCATGTAC

ATTTTCTTAGGAAATTTATCCTTCCTGGAGATCTGGTATACCACAGCCACAGTGCCTAAA

CTGCTGGCTACCTGCCTCTCACAGATAGTGACCATCTCCATTTCTGGGTGTATAACCCAG

TACTACTTCTTTTTCTCCATGGGGGCTACTGAGTGCATCCTGCTGGCAGTGATGGGCTAT

GACAGGTACCTGGCAATATGCAACCCTCTTCGCTACTCACTCCTCATGAGTCTTCAGATT

TGCCTGTGGTTTTCAGCTGGATCTTGGATTGGGGGCTTCATTGCCCCACTCCTACCTACC

ATACTCATCTCTTATCTCAACTTTTGTGGCCCACAGAAGATCAATCATTTCTTCTGTGAC

TCAGATCCCATTTTCAAACTCTCTTGCTCAGATACATTCTTTGCAGAAGCCTTGGGCTAC

ACGTGTAGCTCTGTTGTGATTCTAAGTTCTTTCCTTCTCACTATGTCCTCCTATGGGCAC

ATAATGCTCACAATAATCAGACTGTCTTCCCGGGAGGCTCAGAAGAAAACTTTTTCTACC

TGTGCCTCCCACCTCACTGTGGTCTCTATCTATTATTGCACTATCATCTTTGCCTACGTT

CGCCCTCCAGCCAAGTACAACTTCACCATCGGTAAAGTGGTGTCAGTATTCTATTGTGTG

GTCACTCCATTGGTAAATCCTTTCATCTACACACTGAGAAACAAAGACGTGAAGAAAGCT

TTCAGGAAAACTCTAGCACAAAAGAGATTGCTCTGGGACAGAAACATACAAGATTTTTAG

>LoafORs1.83P

GTGGCCAACCTCACTATGGTGACAGAATTTATTCTCATGGGATTCTCTGACACTGAAGAA

CTTCAAATCTTACATGCTATATTATTCTTATTGATCTACATGACAGCTCTGATGGGGAAT

ATCCTTATCATCACTCTCACCTCTCTTGACCAATGCCTTTCTACTCCTATGCACTTCTTC

CTGAAGCACCTCTCTTTTTTAGATTCCTGTTTTATCTCAGTCACTGTACCCAAATCTATC

ATTAATTCAATTATGCACACCAGGTCCATCTCTTTCTTGGGATGTGCCACACAGTTGTTC

TTAATCCTTTACCTGGCCTTTTCAGAGTTAGTCTTA/CTTACAGTGATGGCCTATGACCA

TTTTATGGCCATTTGTCATCCCTTACACTATGAGGTCATTATGAGCAGGAAGTTCTGTGT

GCAGCTGGCAGCAGCTTCTTGGCTTAGTGGGGGAATAGGTGGGGACATGTACACTTCCAT

CACCTTTTCATTACTTTCTGTGGCTTCCTCATAAAACAATTTTTCTGTGATGTCCCTTCC

TTAAAGAAGATCTCATGTGTCAGTATGTATCTTGTTAAAATTGTTATGAATGCTATTATT

TTTTTTTCTGGCCTTAGAGTGCTTTATTTCTATCATAGTGTCATACACTTATATATTTCT

TGCTGTACTGAAGATCCCATCAGCAAGGAGATCTAAAGTCTTCTTAACCTGCCTGCCTCA

TCTTCTTGTCATGACCTTATTTTTCTCAACTGGCACCACACCTTATTTAATTCTCGAGTC

AGATAACCCATCTATTCAAGATCTTTTATTATCTGTCTTCTACACAGTGGTGCCTCCAAC

TCTGAATCCCGTGATCTACAGCTTGAGAAATAAAGATATCAAAGATGCTCTAAGAAAAAT

ACTT

>LoafORs1.84P

TTTTGGGGGATCACAATTCAATCCATGACATATGCTATACTATCTCTATTAATCCACGTG

GTAGCTCTGATGAGAAATATCCTCATCATCACTTTCATCTCTTTTGATCAGTGTCTTTCT

ACTCCTGCATACTTGTTCCTGAAGCAACTCTCTCATTTAGATATCTGTTTCATCTCAGTC

AGTGTACCCAAATCTGTCAATAATTCAATAACATACACCAGGTCCATTTCTTTCCTGGGA

TGTACCACACAATCATTCTTAGACCTTTACCTGGCCTTTTCAGAGTTAGTCTTACTCATA

CTGATGGCCTATGACCATTATTTAGCTATTTGTCACCCCTTACTCTATGAGGCTGTCATG

AACAGGAACTTCTGCATGTACCTGGTGGTAGCTTCTTTGCTTAGTGAGGGCATAGGTGGG

GGGATGTACACTTCCCATCATCTTCTCATTAACCTTCTGTAGCTTCTTCATACGACAATT

TTCTGTGATGTGCCTCCCTTAATGAAGACCTAATGCACTGGCACACATATTGCTAAAACT

ATCACGACTGTTATACTTTTTTTTATTGGGCTTGGGATGCTTTGTTTCCATGACATTCTT

GTTGTTGTTAGCCGCCATCGAGTCAGTTCTGACTCATAGCTACCCGGTGCACAG

>LoafORs1.85P

ATGAAGATGATAGGATTTATGAAGAAGTTAAACAAAACCAACTTCTTGGAATTCATTCTT

GTGGGGTTTTCTGATGACCCAGCCCAAAAGCCAGTCCTCTTTTCTCTGCTCCTCTTCATT

TACCTGACCACCATGATTGGGAACCTGTTCATCATCCTAACGATTGTTTCGAATGCTCAT

TTTCACTCCCCTATGTATTTTTTCCTTGGCAATCTACCCTTGATTGATCTCTGTTTATCT

TCCACTACAGTTCCTAAAATGCTTGCAGACATCCAGTCAGGAAATTCAACTATCTCTTTC

AATGGCTGCCTGATACAAATGTACACGTTTATCTGCTTTTCAGGGTTGGAAACATTAGTT

CTGCCTATTATGTCCTATGACCGTTTTGTGGCCATCTGCCTTCATTTGTCTTACTTAGCC

ATTATGACGCCCAAGTTTTGTGCTCTTCTGGTGGTCATCTCTTGGATCTTTGCAATCTTC

AGTGCTCAGATACACACCATTCTATTAGTTCAGTTATCATTCTGTGAGGATAACAAAATT

CCTCAG

>LoafORs1.86P

ATCTCTGCCTTGTTTCCATCACCATTCCCAAATCCATCGCAAACTCTCTGGCTAATCACA

ACACCATCTCATTTCTTGGCTGTTTCGCAGGTGTTTTTCTTCTTCCTCTTAGCCACTTCA

GAAGTATCTCTACTCACAATGATGTCTTTTGATGGCTACATTGCCATCTGCTACCCACTG

AGGTATGAAATTATCATGAGTCATGGAGCCTGTGTGCAGATGGCAACTTCCTCCTGAGTC

AGCGGAGTTCTCATTGCAACTCTGCACACAGCTTCTAATTTTTCCATGCCTGCGTATGGG

TCTCCTAAGTTTCATCAGTTCTTCTGTGATGTTCCACAACTGCTCTCCCTCACCTGTCCT

TATCATACTGTGGAATTTATAGTCATTGGGCTCAGCATGGTGTTAGATTTTGGCTGTTTT

GCGTTTATTGATATTTCTTACATC/CTTCTGAGAATCTCATCCGGAGAAGGCAGGTCTAG

AGCTTTCTCCACATGCTTGCCTCACCTCACTGTTGTGACTCTCTTTCTCTTTTCCAGTTT

TTCTTTTTCCTGTTTATGACCCTTACCCAAATTTCCATCACCCTTGGCTTTACTGGTGTC

AGTATTCTATACTATGGTGCCACCCACCATGAATCCCCTCATCTATAGTCTGAGAAATAA

GGGTATGAAGATGGCATTAAAGAAAGTGTTAAAGAGTAGGCATTGCCCTTCAAAT

>LoafORs1.87

ATGGAAAGGGGAAATGTAACATTTATCAGTGAATTTGTCCTTCTGGGACTCTCCAGCTCT

GCAGAGCAGCAACACCTCCTGTCTGTACTGTTCCTCTGTATGTACTTAGTCACTGTGTCA

GGGAACATACTCATCATCTTGGCCATTGCCTCTGACTCTCACCTCCATTCCCCTATGTAT

TTCTTCCTTAGCAACTTGGCCTTTGTTGACATCTGCTTTACTTCCAATATAGTCCCCCAA

ATGGTAGTGAATGGCTTGACTGGTACAAAGACTATCTCTTTTTCAGGCTGCCTCACCCAG

CTTTTTTTCTTCATTTCTTTTGTGAATATGGATAGCCTCCTTCTCTGTGTGATGGCATAT

GATAGGTATGTGGCAATATGCCACCCTTTACGTTATACCACCCTAATGAATCCTCACCTC

TGTGTCCAGCTGGTGGCTGGACTCTCAGTAGTTACCTATCTTCATGCCTTTCTACACACT

GCCCTAATAGCACGTCTGTCCTTCTGTGCCTCCAACGTCATCCATCATTTCTTCTGTGAT

CTCAACATGATCCTGCAGCTCTCTTGCTCTGATATCTCCTTCAATGTGATGGTCATTTTT

ACAGAGGGAATTCTATTGGCTCTCACACCCTTTATCTGCATCCTCATATCTTATGGATTT

ATCTTTTCCGCCATCCTGAAGATAACTTCTAGTGAAGGGACGCAGAGAGCTTTTTCCACC

TGTGGCTACCACCTGTCAGTGGTCGTGTTGTTCTATGGCACAGCCAGTGCTATTTACTTC

AGCCCCTCCTCCTCTCATACCCCTGAGAGGGACACTCTGTCAGCCATCATGTATACATAC

TGTGGTGACTCCGATGCTGAATCCTTTCATCTACAGTCTAAGGAATAA

>LoafORs1.88P

ATGGAAAGGGGAAATCTAACACTTATCGGTCCATTTGTCCTGGGACTCTCCAGCTCCGCA

GAGCAGCAACACCTCCTGTCTGTACTGTTCCTCTGTATGTACTTAGTCACTGTGTCAAGG

AACATACTCATTATCCTGGCCATTGCCTCTGACTCTCACCTCCACTTTCCTATGTATTTC

TTTCTTAGCAACTTGGCCTTTGTTGACATCTATTTTTCTTCCAGTACAGTCCCCCAAATG

ATAGTGAATGGCTTGACTGGTGCAAAGACTATCTCTTTTTAAGGCTGCCTCACCAAGCTT

TTTTTC/ATTTCTTTTGTGAATATGGATAGCCTCCTTCTCTGTGTGATGGCATATGATAG

GTATGTGACAATATGCTACCCTTTACATTATACCACCCTAATGAATTCTCACCTCTGTGT

CCAGCTGGTGGCTGGACTCTCAGTAGTTACCTATCTTTATGCTCTTCTACACACTGCCCT

AATAGCATGTCTGTCCTTCTGTGCCTCCAACATCATCCCTTATTTCTTCTGTGATCTCAA

CTCACTCCTGCAGCTCTCTTGCTCTGATATCTCCTTCAGTGTGGTGGTCATTTTTACAGT

GGGAAGTCTATTGGCTCTCACACCCCTTATCTGCATCCTCATATCTTATGGATTTATCTT

CTCTACCATCCTGAGGATAACTTCTACTCAAGGGAAGCAGAGAGCTTTTTCCACCTGTGG

CTACCACCTGTCGGTGGTCGTGCTGTCCTATGGCACAGCCAGTACTTTTTCCTTCAGCCT

CAGCCCCTTCTCTTTTCATATCCCTGAGAGGGACACTCTGTCAGCCATCATATATACCAT

GGTGACTACGCTGCTGAATCCTTTCATCTACAGTCTAAGGAATAAGGATATGAAGAGAGC

ACTTCAGAAAATATTTTGTAAGGGCAGAGTCTTC

>LoafORs1.89P

ATGACAAATCTAACAGTTTTGACTGAATTTGTACTTATGAAATTTTCTACCAATGAAATT

ATGTGTATTTTGCACTCAGTGCTCTTCTTAGCCCTGATGGGGAATGCCTTTAATCATGAT

CACGACTTTGGCCTGGTACCTCCACACTTCCATGTACTTTTTCTTGAAGGATTTATCCTT

CTTGGATCTCAGCCTCATTTAGTCACAATCTCCAAATCTATCATCAACCCTTTGACCCAA

AACAACTCTGTCTCATTCCTTGGCTGTGTCATCCAGGGCTTTCTGGTACTATTTTCAACT

CCTGTGGAGCTGTTCCTCCCCATAGCAATGTCCTTTGATTGCTATGCAGTCATTTTCCAT

CTCTTGCACTATGATGTCATCATGAACAGGGGAATGTGTTTGCAGATGGCAGCTGTGTTT

TGGCCGTGTGGGTATCTGATTGCAGTGATGCACACAGGTGGGACCTTCTTATCTTCCATC

AGCTCTGTGGCATTCCCAGCTGTTAGTTATTTCTTGCTCAGAAAATTTATTAAGAGAAAT

TGTGCCCTTCCTCAGTAGTGTGGTGATAGATTTCTGCTGTTTTATTTTCATTATCATTTA

CTATGCCTACATCTTCTCCATTGTCAAGAAGATTCCATCAACAGAGGGCCAGTCAAAAGT

CTGTTTCATTTTTCTTCCACACCTGGCTATTATTGTATTATTTGTTTCCATTTAATTTCT

TATGTAAGGCCAACCTCAGAGTCTACATCTATTTCTAACCTTATAATTATTATATTTTAC

ACA

>LoafORs1.90

ATGCAGATTACTCCATTGAGAATGAACAATATCTCAGCGGTGACAGAATTTCTTCTTGTA

GGTTTTTCTGGCCCGTGGAAGCTTCAGTTATTACAAGCTGGGACTTCCATAGTGATTTAC

CTGGCAGCCCTGATGGAGAATGGTCTCATTATCACCATAACCTCTTTGGACCCATGCCTT

CGCAAACCCATGTACTTCTTCTTAAGGTATCTCTCCCTCTTTGATCTTTGCCTCATTTCT

GCAGTTGTGCCCAAAGCTATTATCAACTCCTTGACCCACAGCAACTACATCTCTTTCCTT

GGCTGTGTCATCCAGCTCTTTCTGGTGATCTTTTCAGCAACCACAGAGCTGTTCCTCCTC

ACAGCGATGGCCATTGACCGCTATGCTGCCATCTGCCATCCCCTGCACTATGAAGTCATC

ATGAACAGGGCCAAGTGTGTGCAGATGGCATCTCTGTCTTGGCTCAGTGGTGGTTTGATA

TGTGTGATACACACTGCAGTTACCTTTTCTTTATCTTACTGTGGAGTCAGTGAAATTCAA

CAATTCTTCTGTGATATTCCCCAGTTGTTAGCTATTTCTTGCTCAGAATATATATTTGCA

GAGATTGCACTCATTCTCATTAATGCAGTACTAGATTTCTGCTGCTTTGTTTGTATCATC

ATCTCTTACATTTGCATCTTCTCCACTGTCAGGAAGATTCCATCCATAGAAGGACAGTCA

AAAGCCTACTCCACTTGCCTCCCACACCTGGCAGTGGTTGTTCTGTTCCTCTCAACTGCC

TTTGGTGCTTATCTAAAACCTATTTTAGGGTCTGCATCCTTCAATGATCTCATTCTATCT

GCTTTATATATTGTGTTGCCCCCTTCCCTTAATCCAATCATATACAGCCTGAGAAACGAG

GCCATGAAGGTTGGTTTAGAGAAGTTAATCACTACAAAGCTCTTGACAAAGAAAAACCTT

CTTATTTTCCTTCAAGAATAG

>LoafORs1.91

ATGGGGAATTGGACTTTGGTGACCGAGTTTATTCTTGTGGGGATACCAACCACCAGAAAG

CTAGGGGGACTTCTGTTCTTGATTTTTTTACTGGCCTATTTGATGACTGTCCTTGGAAAC

ACCCTCATCATTACCCTGATCATTGTGGACTACAGGCTCCAATCACCCATGTATTTCTTC

CTCAGTAATTTCTCTTTCAGCGAAATATTAACCACAACCTCTGCTGTTCCCAAGATGCTG

TCAGCATTCCTGTCAGAGAAGAAGAGTATCTCATTTGGTGGGTGCTCTGCACAGTCCTAT

TTCTACTTCCTCTCTGGATGCACTGAGTTCATCCTTTTTGCTGTCATGTCCTATGACCGC

TATGTGGCCATTTGCAGCCCCCTTCAGTATCCAGTGATTATGACCAGCTCACTCTGTGTC

CGTCTTGTCATTCTTTCCTGGGTAGGTGGCTTTCTTCTCATCCTGCCATCTACCGTCCTT

AAGGCAGGATTGCCATACTGTGGCCCCAATGTTATTGATCACTTTTTCTGTGACAGTGGC

CCTCTCCTCCACTTGGCCTGTGCTGACATCCGTGTCATTGAGCTATTGGACTTCCTCAGC

TCCCTTGTCCTGCTTGTCAGCTCCCTTTCCCTCACAATGGTCTCCTATGTGTACATAATC

TCCACCATTCTGAAGATACCTTCAGGTCAAGGTCAACGCAAAGCCTTTGCCACTTGTGCC

TCTCACTTCACTGTGGTGTGCATGGGCTATGGGATCTCCATCTTTGTCTATGTCCACCCC

TCACAGAAGAGCAGCCTGCGCCTCAACAAGATTCTCTTTATTCTCTCCAGTGTCATCACA

CCTCTTCTGAATCCCTTCATCTTTAGTCTACGGAATGAAACCATGAAAGATGCACTGAAG

GACACCTTGGCCAAGGGTGGGGACTTTCTCAAGGGGCTGAGGTCCATATGA

>LoafORs1.92

ATGGGGAGATGGAGCAATCAGACCACTGGAAATGACTTTGTTCTCCTGGGGCTGTTCCAC

CGCAACCAAGCACCCAAGCTTATCTTTGCTGTCATCTTCCTGGTGTTCCTCATGGCCCTG

GTTAGCAATGCTGTGATGATGATTCTCATTTGGTTGGAGTCTAGACTTCATACTCCTATG

TACTTTCTTCTGAGCCAACTTTCCTTCATGGACCTCTTGTATAGCTCCACTTTTTTCCCC

AAGATAGCCATTGACTTCCTTTCTGGGAAGAACACCATTTCTTTTATTGACTGTGGAATT

CAGCTGTTCCTTTTCATGACCCTTGTGGGAGCAGAATGCCTCCTCCTGGCTGTCATGTCT

TATGACCGCTATGTGGCTATCTGCCACCCACTCCATTACTCAATTCTCATGCGCCCTGCA

GTCTGTGGTTTTATGGTGGTTGGGAGCTGGCTGGGTGCACTGCTCAATGCCTTGATCCAC

GTCTTGTATACTCTCAATCTCTCATACTGTGCCTCCAGGGAAATCCATCATTTCTTTTGT

GAGATACCAGCTCTCCTGAAACTTGTTTGTGGTGACACATTTCTTTATGAGAATGGTCTT

TTTGTCAGTGCTGTTGTGTTCCTCCTTATTCCAATATCAGCCATCATGGCCTCCTATGGG

AAGATTGTCACAACTGTTTTGGGATTAGGGTCAACCATGGGAATAAAAAAGGCTTTGGCT

ACCTGTTCTTCCCATATGATTGTGGTGTCTGTCTTCTATGGAACAGCCATCATGAAGTAT

TTTCTGCCCAAAGCCTATCATACTGCTGAGCAGGATGAAGTGGTCTCTGTCTTCTACACT

ATTGTCACACCCATGCTTAACCCCCTTATCTACAGTCTTCGAAACAAAGAGGTGGCTGGA

GCCCTGAAGAAGGTTCTGCAAAGATAA

>LoafORs1.93

ATGAAGACAGAAAATCAAAGTTTTGGAGCAGAGTTTATACTTCTTGGCCTTTTTCAATAT

GGCCAAATGAACACTGTCTTTTTTGTTGCCATCTCCATCTTCTTCTCAGTGGCTCTGTTG

GGGAATATCATAATGATCTGCCTCATCATCTTGGATTTCCGACTCCACATTCCCATGTAC

TTTCTTCTCAGTCAGCTCTCTTTCATTGATGTGATGTACATCTCCACCACGGTACCCAAG

ATGGCAGCAAACTTTCTGTCAAATAGTAAGACCATTACTTTTTTAGGTTGTGAGATTCAA

ACCTTTGTGTTTTTGACCCTTGGTGGAACTGAAGCCCTTCTTCTTGGTTTCATGTCTTAT

GATAGATATGTAGCCATCTGTCACCCTCTACATTATCCTGTGCTCATGACCAAGACGATC

TGTTTGTCCATGGTCACATGTGCATGGGCCAGTAGTTCTATCAATGCTTTAATACATACA

TTGTATGTATTTCAACTTCCATTCTGTAGATCTCGGCTCATTAACCACTTTTTCTGTGAA

GTCCCATCTCTAATGCCTTTGGTGTGTCAGGACACCTCCCAGTATGAGTATACCATCCTC

TTTAGTGGACTTATTATTCTGTTGCTGCCATTCATGGCTATCCTGGCTTCCTATGCCCGG

GTGTTTATTGTGGTATACCAGATGAGCTCAGGTAAAGGGCAGACAAAAGCCGTCTCCACG

TGTTCCTCTCACTTGATTGTTGTAAGCCTATTTTATGGGACGGGTATCTCTACCTATATG

AGGCCACACTCCTTGCATAATTCCGAACAGGATAAAGTGGTGGCAGTATTTTACAGCATT

ATCACACCTCTTCTGAATCCATTTATCTACAGTCTTAGGAACAAGGAGGTTATGGGGGCC

ATGAAGAGACTGATAGGATAA

>LoafORs1.94

ATGGGGAATTGTAGTGAAACATCAACTGATTTCATTTTATTAGGATTGTTCCCACCATCA

AGAATTGGCCTTTTCCTCCTCATTCTCATCATTCTCATTTTCTTAATGGCTTTAATTGGT

AACATATCCATGATTATCCTCATCCTACTGGACACCCATCTCCACACACCCATGTATTTC

CTGCTTAGTCAGCTCTCTCTCATGGACCTGAATTACATGTCCACTATTGTCCCCAAGATG

GCTTACAATTTCCTGTTTGGAAACAAGTCAATCTCCTTCATTGGATGTGGAGTTCAGAGT

TTCTTCTTTTTGACTTTGGCAGGTGCAGAGGCACTTCTCTTGGCATCTATGGCTTATGAC

CGTTATGTGGCCATTTGCTTTCCTCTTCACTATCCCGTTCGTATGACCAAAAGTGTGTGT

GTGTTAATGACTACAGGATCTTGGATAATGAGCTCTATCAATGCATGTGCCCACACTGCA

TATGCACTCCATATGCCCTATTGCCAGTCCAGGACCATCGATCATTTCTTCTGTGATGTC

ACAGCCATATTGGCTCTGGCATGCACGGATGCCTGGGTCTATGATTACATAGTGTTTGTG

TGCAGTACCTTATTCCTTGTGTTTCCTTTCATTGGCATTACCTATTCTTATGGCCGGGTT

CTCCTTGCCATCTACTGCATGCCCTCATCAGAAGGGAGGAAGAAGGCCTATTCAACCTGC

AGTACCCACCTCACTGTGGTGACTTTGTACTATGCACCCTTTGTTTACAATTATCTACAC

CCCAGATCCTTCCAATCTCCAACAGTAGACAAGGTTCTGGCTGTTTTCTACACTGTCCTC

ACCCCCATGTTCAACCCTGTCATCTACAGCCTGAGGAACAAGGAGGTAATGAGGGCCCTG

AGAAAAGTTACTCAGAGAATATTCTCTGTGAAAATGTAG

>LoafORs1.95

ATGGAGCACAAAAACAAGACGAAAATCACTGAATTCATCCTTCTAGGGTTTCAGAATGAT

AAAGAAGTAGAAATACTTCTCTTTGTTGTATTTCTTCTCATGTACATGACGTCTCTGATT

GGCAACACCATGATTATCCTTTTGGTGTGTGTTGACTATCGTCTGTACTCACCTATGTAC

TTCTTTATAGCCAACCTTTCTTTCCTTGAAGTCACCATCACCTCCACAGTGGTGCCAAAG

ATGCTAGCCAACACTTTTTCACTCAGCAAAGTAATATCTTTTGCAGGATGTCTTACACAG

TCTTTCTTCTACTTCCTCCTGGGATCCACAGAATTCTTCATCCTAGCTGTCATGTCCTTT

GACCGATACGTTGCCATCTGTAACCCACTGAGGTATACCATCATCATGAACAAACAGACA

TGTATGTTCTTGCTTCTGGGATCCTATGTGGGTGCATTTTTGTCAATTTTGGTATCATCA

ATCTTAACTGCACCTCTGCCCTTTTGTGGGACAAATGTAATCAATCATTTCTTCTGTGAC

AGTGCCCCAGTGCTAAAGCTAGCCTGTGCAGATATTTCACTGGTTGAGCTGGCTGACTTC

ATCTCCTCTGCTGTATTGCTCTTGGGCTCCCTGCTGCTGACAGGAGTGTCTTACACCTAC

ATTGTTGTTACTATCCTTAGGATTCCTTCTGTCCAGGGACAGCAGAAGGCCTTCTCCACC

TGTGTTTCCCACATCACAGTGGTTACACTTTATTATGGGAGCTCCATCTTCATCTACGTC

CGCCCAGAAAAGGGCAATGTTATGGATGTTAACAAATTTGCCACAGTGCTGAACACTGTT

GTAACACCAATGCTGAACCCTTTCATCTACAGCCTCCGAAATGAGAAGGTCAAAGAATCT

CTGAGAGATGTCTTCAAAAAATATGTAGGTAGGTTAACAAATTTAAGTTCTCAAAAATGA

>LoafORs1.96

ATGGATCACAAAAACAAGACCAGAGTCACTGAATTTATTCTTCTAGGGTTTCAGAATGAG

AAAGAAGTAGAATTTTTCCTCTTTGCTGTATCCCTGCTCATGTACATGACATCTCTGATT

GGCAACACCATGATTATCCTTTTGGTGTGTGTTGACTATCGTCTGTACTCACCTATGTAT

TTCTTTGTAGCCAATCTTTCCTTCATTGAGGTCACCATCACTTCCACAGTGTTGCCAAAG

ATGCTAGCCAACACTTTTTCACTCACAAAAGCAATATCTTTTGTAGGATGTCTCACACAA

TCTGTTTTCTACTTCCTTCTGGGATCCACAGAATTCTTCATCCTAGCTGTCATGTCCTTT

GACCGATATGTTGCTATCTGTAACCCGCTGAGGTATACCATTATCATGAACAAACAGACA

TGTGTATTCTTGCTTCTGGGATCTTATGTGGGTGCATTTTTTTCAATGCTGGGGCTATCT

GTATTAACTGCCCCCTTAATATTTTGTGGGCCAAATAAAATCCATCATTTCTTCTGTGAC

AGAGCCCCAGTGCTAAAGCTAGCCTGTACAGATATCTCTCTGGCTGAGTTGGCTGACTTC

ATCTCCTCTGCTGTATTGCTCTTGGGCTCCCTGCTCCTGACAGGGGTGTCTTACACCTAC

ATTGTCATTACTATCTTTAGAATTCCCTCTGTCCAGGGAAGACAGAAGGCCTTCTCCACC

TGTGTTTCCCACATCACCGTGGTTACGCTTTATTATGGGAGCTCCATCTTCCTCTATGTC

CGCCCCAATAAAGGTAATGCAGTAGACATTAACAGATTTGCCACAGTGCTGAACACCATT

GTGACACCAATGCTGAACCCTTTCATCTACAGCCTCCGGAATGAGAAAGTCAAAGAAGCC

CTGAGAGATGCCTTTGATAAGTGTATAGGTAGACTAACAAATTTAAGTTCTCAAAAATGA

>LoafORs1.97P

GGGGGGCTCCTGTTCTTGATTTTTTTATTGACCTATTTGGTGACTGTCCTTGGAAACACC

CTCATCGTTACCCTGATCATTGTGGACTACAGGCTCCAATCTCCCATGTATTTCTTCCTC

AATAATTTCTCTTTCAGTGAAATATTAACCACAACCAGTGCTGTTCCCAAGATGCTGTCA

GGCTTCCTGTTAGAGAGGAAGAGCATCTCATTTGATGGGTGCTCTGCTCAGTCCTATTTC

TACTTCCTCTCTGGATGCACTGAGTTCACCCTTTTTGCTGTCATGTCCTTTGACCTCTGT

GAGGCCATTTACAGTCCCCTTCAGAATCCACTGATTATGACCAGCTCACTCTGTATTTGT

CTTGTCATTCTTTCCTGGGTAGGTGGTTTTCTCCTCATCCCGCCATCCACCATCCTTAAG

GCAGGATTGCCATACTGTGGCCCCAATATGATTGATCAGTTTTTTCTGTGACAGTGCTCC

TCTCCTCCA

>LoafORs1.98

ATGGATAAGATGGGACAGCAAAATTCCAGCACAATTACTGAGCTTGTACTTATTGGATTT

TCCAATCACCCCCAAGCTGAGATCCCCCTCTTCTTCCTCTTCTCTCTGATCTACTTGGTA

AATCTTTTTGGAAACACAGCCATCATCACCTTAGTGGTTTTTGATTCCTTTCTCCACACA

CCCATGTATTTTTTTCTCTGTCATCTCGCCTTCCTAAATTTATATTTTAGCACACTTGTG

GTCCCAAAAATGCTTTTTAACTTCATTGTAACCAGAAAAGTCATATCTTACAACTTCTGC

CTTGCCCAGACCTACATCACTTTATTCCTGGAGGCAACTGAGTGCTTTCTGCTTGCAGTG

ATGGCTTTGGATCGCTATGTGGCTATTTGTTACTCACTTCGATACCTGATTGTCATGAAC

TGGTCTGTGTGTCTGGCACTATCTCTGGGGGCCTGGACCCTTGGCTTCTTTGCCTCAGTA

GTGCCACTCTACTTCATAATCCTCCCACTCTGTGGTCCATATATTGTTGACTATATTTTC

TGTGAACTGCCCATCCTTCTTCACATGTTCTGTGGTGATACATCCCTGGATGAGACCATG

ATGGTGGCAGGAGGGGCTGGAACCGTGTTATTCCCCTTCCTCCTCATTATATTCTCCTAC

CTCCACATCTTGTTGGCTGTGATGAGAATAGACTCAGCTGAGGGCAGGAAAAAAGCCTTT

TCCACTTGTACTTCTCACCTGACTGTGGTGACCATATATTATGGGACAGGGTTGGTCAGG

TACATGAGACCCAAGTCCCTTTACTCCGCAGAAGGAGATAAACTGATCTCCTTGTTCTAT

GCGGTCATCAACCCTATGATAAATCCTTTTATTTACAGCCTGAGGAATAAGGAAGTGAAG

GGGGCGATGGGAAGAGTAATGGAGAGATACAAAAAAAGCCAACAAATCACAGATTAA

>LoafORs1.99P

ATGATGGATGGCACAAATGACAGCTCCCAAAACCATTTCATCCTTTTGGGGTCTTCTGAC

CATCCCCATCCAGAGAGAATCCTCTTTGTGGTCATCTTGATTACCTCTGTCCTGACCCTC

ATGGGCAATACCACCACCATCCTGGTGCCCTGGCTGGACCCTCATCTCCACACCCCCATG

TATTTCTTTCTCACCCACCTCTCCTTCCTGGACCTCAGTTTTACCACTGTCTACAATCTT

AGTGGATGTGATAAGACCATCAGCTGCACAGGTTATGGCATCCAGCTATTTCTATTCCCG

GGTCTGGGTGGTATAGACAACCTGCTCCTGGATGTCATGGCTTATGACCGATTTGTTGCA

GTCTGCAAACCCCTGCACTACATGATTATTATGCGTCCTTAGCTCTTCCTGGGTTTAGTG

TTCCTTGCTTGGGGCTGTGGGGTGGCCAACTCTTTGACCTTGTGGTCATCCCTCTGTGGG

TACCACATAGTGAACAACTTATTGTGTGAGATGTCAGCCTTGATCCGGATGCTCCGTGTC

AACACAGCTGCCATTGAAGGCATTGCCTTTATTCTGGCGGTGGGCATTGTACTGTCACCC

TCGGCTTTTATCCTGGTGTCCTATGGATATATCGTGAAGTCTGTGTTAAGTATCCAGTCA

TCCTCTGGGAGACATGAAGACTTAAATATATGTGGCTCTCATTTCACTGTAATCTCACTT

CTCTATGAAAACATCATCTACATGTACATACAACCAGGAATCAGTTCCTCCAAGGACCGG

GGAAAATTCCTCACCTTTTTCTACAACATTGTTGCTCCCCTCCTAAACCCCTTGATCTAC

ACCCTCAGAAACAAAGAGGTGAAGGGGGAACTGAGGAGGCTGATGATGGGTAAAAGGGGG

ATAGGAAAG

>LoafORs1.100

ATGTCAGCCACCAAGATGACTCCAGAAAATTCCAGCACCGTCACAGAGTTGGTCCTTATT

GGTTTTTCCAATCATCCCCAGGCTGAGATTCCTCTCTTCTTCCTCTTCTCTCTGATTTAT

CTGATGAATCTCTTTGGGAACACAGCAATTTTTGTTTTGGTGGTAATTGATTCCTGTCTT

CAGACACCCATGTATTTTTTCCTCTGTCACTTGGCCTTTCTCAACATATTTTATACCACA

GCTGTGGTCCCCAAAATGCTCCTCAACCTTCTGGCTTCTAAGAAAGTCATTTCTTATGAC

CTTTGTCTTGCCCAGACCTATATCTCCCTGCTAATGGGAGCAGCTGAGTGCATTATTTTG

GCAGTCATGGCTCTGGACCGTTACACAGCCATTTGTTACCCCCTGCGATACTTGCTTATC

ATGAACTGGTCTCTGTGTGTGCAGCTGTCTGCAGGAGCCTGGACCATCAGCTTTTTTGTT

TCAGTGGTGCCCCTCTACTTTACCATAGTTCCCATCTGTGGCCCTTATATCATCGACCAC

ATTTTTTGTGAAGTACCTGTTTTTCTTCATATGATTTGTAATGATACATCCCTACAGGAG

ATCGTCATGGTAATAGGAGCATCCGGCACCCTCTTGCTTCCTTTCCTCCTTATTGTCCTC

TCCTACCTAAGAATCCTAGTTGCAGTGATAAGGATGCATTCGGCTGAGGGAAGGAAAAAA

GCTTTTTCTACCTGCAGCTCCCACCTGACTGTGGTGACCATTTATTATGGGACAGGGATG

TTCATGTACATGAGGCCTAAATCCGTATATTCAGCTGAAGGTGATAAATTAATTTCCTTG

TTCTATGCAGTCATCAACCCTGCTTTGAACCCTCTAATCTATAGCCTGAGAAACAAGGAG

GTACAAGGAGCTATGCAGAGAGCCTTGGAAAGATGGAAAGTGTTCCAAAGGCAAAATATA

CTACCTTGA

>LoafORs1.101

ATGCAGAGGGAGAACTGGACCATAGTGACTGAGATCACTCTTCCTGGGATACTCACAACC

AGAGCCCTTGGGGGCCTCCTGTTCATGTTTTTTTTATTTACCTATTTGGTGACTGTCCTT

GGAAATGCCCTCATCATTACCCTGATCTTTGCAGATCACAGGCTTCAATCGCCCATGTAT

TTCTTCCTCAGCAACCTCTCTTTCAGTGAAATTCTAACCACAACCTCTGCTGTTCCTAAG

ATGTTGGCAGGCTTCCTATCAGAGAGGAACAGTCTCTCATTTGGTGAATGCTTCACCCAG

TCTTATTTCTACTTCCTCTCTGGATGCACTGAGTTCATCCTTTTTGCTGTCATGTCCTAT

GACCGCTATGTGGCCATTTGCAGCCCTCTTCAGTATCCAGTGATTATGAGTGGCTCACTC

TGTGTTCGCCTTGTCATTCTTTCCCGGGTAGGTGGCTTTCTTCTCATCCTGCCATCCACC

ATCCTTAAGGCAGGGTTGCCGTACTGTGGCCCCAATGTGATTGATCACTTTTTCTGTGAC

AGTGCCCCCCTCCTCCACTTAGCCTGTGCTGACATCCATGTCATTGAGCTATTGGACTTC

CTCAGCTCCCTTGTCCTGCTCATCAGCTCCCTTTCCCTCACAGTGGTCTCCTACATGTAC

ATCATCTCCACCATTCTGAAGATACCCTCAGGCCAAGGTCAACGCAAAGCCTTTGCCACC

TGTGCCTCTCACTTCACTGTGGTGTCCATGGGCTATGGGATCTCCATCTTTGTCTATGTC

CGCCCCTCACAGAAGAGCAGCCTGCACCTCAACAAGATTCTCTTTATCCTCTCCAGTGTC

ATCACACCACTCCTAAATCCCTTCATCTTCAGTCTACGGAATGAAACCATGAAAGATGCA

CTGAAGGACACCTTGGCCAAGGGCCATAAATTCCTTAAGCAGATGAGTGACAGGATCTTT

GAGAATCACCCCAAACTTAGATATTCTCAGCCTTACAGAGGATGA

>LoafORs1.102P

AATATATCCATTGCCACTGAGTTTCAGCTGCTAGAATTCCCAAACCTTCTTGAATGGCAG

ACCTTGCTCTTTGCCATTTTCCTGATCATTTACTTCCTTAGAATCATGGGAGATGTTATC

ATCACAGTGGTGAGCCAGGATCAGCAACTGCACCTAACTATGTATATGTTCCCCAAGCGC

CTCTCTTTTCCAGAGATCTGGTATACCTCTACCATTGTACTGCTTCTCCTAGCCAACTTA

CTCTCCCGGGGCCAAGTCATCTCCTTCTCTGCTTGTATGGCCCAGCTCTATTTCTTTGTC

TTCTTTGGGGCTACTGAATGCTTTTTTCTGGCCATGATGGCCTATGACTGAAATCTGGCC

ATTTGTAGCCCACTCCACTACCCCTTCTTGAAGAGTCCTGAGATCTGTGCCAAGCTGGTG

GCCATATCCTGGTTGACAGGGGTTGGCACAGGCTTTCTGCCTTCCCTGATGATTTCCAAG

TTGAAATTCTGTGGACCCAGCCAGATCAATCATTTCTTCTGTCACCTCCCTCCCCTCATG

CAGCTGTCGTGCTCTAGAATTTATATTACTAAGTTGTTAATCTTAGTCCTGTCAGTTGCT

GTGCTGTGCATTTGTTTTCTTCTTACGCTTGTGTCCTACATTTTCATTGTGTCTTCCATA

TTGAGAATTCCTTCAGCCTCTGGCTGGCCGAAGACCTTTTCCACGTGTTGATCCCATCTG

GCTGTTGTCACTATCTACTATGGGACCATGATCTCCATGTATGTCTATCCCAATGCCCGC

TTGTCACCAGTAATCAACAAGATTATTTCTGTCTTCTACATTGTTGTCACCCCACTACTG

AACCCTGTTATCTACGGCTTGAGGAATAAAGACTTCAATGAGGCTATTAGAAAAGTCATG

AGAAGAAAGTGTGGCATATATGCAGTAAGAGTGAAAGGAAGTGTCTTTATTAGG

>LoafORs1.103

ATGATGGATGGCACCAATGACAGCTCCCAAAGCCATTTCATCCTTTTGGGGTTTTCTGAC

CGTCCCCACCTAGAGAGAACCCTTTTTGTGGTCATCTTGATTGCCTATCTCCTGACCCTT

GTGGGCAACACCACCATCATCCTGGTGTCTCAGCTGGACCCTCACCTCCACACCCCCATG

TACTTCTTTCTCACCCACCTCTCCTTCCTGGACCTCAGTTTCACCACCAGCTCCATCCCC

CAGTTGCTCTACAACCTTAATGGATGTGACAAGACCATCAGCTACACTGGTTGTGCCATC

CAGCTCTTTCTATTCCTGGGTCTGGGTGGTGTAGAGTGCCTGCTTCTGGCTGTCATGGCG

TATGACAGATTTGTTGCCATCTGCAAGCCCCTATACTACATGGTGATCATGAATCCGCGG

CTCTGCCTGGGCTTGGTGTTGGTAGCCTGGGGCTGTGGGGTAGCCAACTCCTTAGTCATG

TCTCCAGTGACCCTGCACTTACCCCGCTGTGGGCGCCGTCATGTGGACCACTTTCTGTGT

GAGATGCCAGCCCTAATCCGGATGGCTTGCATCAATACCGTGGCCATCGAAGGCACTGTC

TTTGTCCTGGCGGTGGGCATAGTGCTTTCACCTTTGGTTTTTATCCTGATCTCGTATGGC

TACATAGTGAGGGCTGTGCTACAAATTCAGTCAGCATCAGGGAGGCAAAAGGTCTTTAAC

ACTTGTGGCTCCCATCTCACTGTGGTCTCACTTTTCTATGGAAACATCATTTACATGTAT

ATGCAACCAGGAAATAAATCCTCCCAAGACCAGGGCAAATTCCTCACCCTCTTCTACAAC

ATTGTCACCCCGCTCCTGAACCCACTGATCTACACCCTCAGAAACAAAGAGGTGAAAGGG

GCACTGAGGAGGCTGCTACTGGGTAATAGAGAGGTAGGAAAGGGGTAA

>LoafORs1.104P

ATGGGGAGATGGAGCAATCATACCACTGGAACTTTGTTCTCCTGGGGGTGTCCCACCACA

TCCAAGCCCCCAAGCTTGTCTTTGCTGTCATCTTCCTGTTACTCTTCATGGCCCTTGTTG

GCAATGTTGTGGTGACGATTCTCATTTGGTTGGACTGTAGACTGCATATTCCTGTGTACT

TTCTTCTGAGCCAACTTTTCTTCATGGACCTCTTGTACAGCTCCACTTTTGGACCCAAAA

TAGCCATTGACTTTCTGTCTTGGAAGAATGCCATTTCTTTTATGGATTGTAGAATTCAGC

CATTCCTTTTCACGACCCTTTCCAGCTGCAGAATGCTTCCTCCTGGCTGTCATGTCTTAT

GACCGCTATGTGGCTATATGCCACTCACTCCATTAATCAATTCTCATGCACCTTGCAGTC

TGTGGTTTCATGGTGGTTGGGACCTGGCTGAGTGCACCGCTCAGTGCCTTGATCCATGTT

TTGTATATTCTGAATCTTCTGTACTGTGCCTCACGGGAAATCAATCTCTTCTTTTTTAGA

GACACCAGCTTTCCTGCAACTTGTTTGTGCTGACACTGCTCTCTATAAGAAAAGTTTTTT

TTCAGTGGTGTTGTGTTTCTTCTCATTCCAATTTCAGCCATCATGGCCTCCTATGGGCAG

ATTCTCACAACTATTTTGGAAGTAGGGTCAAAATTGTGATCGAAAAAGGCTTTGGCTACC

TGTTCTTCCCATACGATTGTGGTGTCTTTCTTCTATGGAACAGCCATCATGAAGTATTTT

CTGCCCAAAGCCTATCATACCACTGAGCAGGATGAAGTAGTCTTTGTCTTCTACACTATC

CTCACAACCGTGCTTAACCCCCTTATCTATAGTCTTCAAAACAAAGAGGTGGCTGGAGCC

CTGAGGAAAGTTCTGGAAAGG

>LoafORs1.105P

ATGGAGAATGCAAATGACTCCACAGGGATAAACTTCATTCTTCTAAGGCTCTTTAGTGAC

ACACAGATCCACCTGTTCCTCTTTGCTGTGGTGCTCATGATCTTCATCACCTCACTGATG

GGCAATGGCCTTATGATCATCCTCATCCATGTGGACCCTCAACTCCACACGCCCATGTAC

TTCCTGCTTAGT/CTTTCCCACATGGGCATGCTGCTGGTCTCCACCATTGTTCCCAAAAT

GGCGGCAAACTACCTGACAGGCACTAGGTCTGTCTCTCCCACTGGCTTTGGAGCCCAGAT

CTTCCTGTTTCTCACTCTGGGAGGGGGTGCATGCTTCCTCTTAGAGGCCATGTCCTATGA

TCGCTATGTGGCCATATGTCACCCACTGTGCTACCCCATTTTCATGAGTCAGAGGCTCTG

CTTGCTCTTGACGGCAGGTTCCTGGCTCCTGGGAAGGGTCGATAGGCTCATGCAAGCTGG

TGCCACTTTGAGCTTCCCTTACTGTCATTCACGGGAAATCAATCACTTCTTTTGTGAGGC

TCCATCTCTGGTATGCCTTGCTTGTGTTGACACCATGATTTTTGAGTTTTTCATGTATGT

GTACTGCATTCTGATGCTCTTGATCCCTTTGTCTCTCATTTTGGCCTCATACAACCTTAT

CCTGGCAGCAGTGCTCTGCCTGCATTCAGCTGCAGCCCAGAAGAAAGTCTTTACGACCTG

CTCCTCTCACCTGGCAGTTGTGGGACTC

>LoafORs1.106

ATGTCATGCCAGAACAACCAGACATCAAGGAGTGATTTCATCCTCTTAGACCTGTTTCTT

GGCACTCAGGCTCCCTGGGTCCTATTCACTTTCACTGTGCTTGCTCTCCTTGTGGCCCTG

TTTGGTAACACCACAATAATCATCCTTATTAGGGCTGACTCTCGTCTCCACAGCCCCATG

TACTTTCTGCTCAGCCAACTGTCCATTATAGACTTCTTGTATATCTCCACGTTTGTCCCC

AAAATGGCCCTCGCCTTTCTATCTGGGAACCACCACATCTCCTTCATTGGCTGTGGTGCT

CAGCTCTTCCTCTTCATGACCCTGGTGGCAGCAGAGTGCCTTCTGCTGGCAGCCATGGCT

TATGATCGCTACGTGGCCATCTGCCACCCACTGCGCTACTCCATCTTCATGCGTCCCTTG

ATCTGCACGCTCTTGGTGGTTGGGTCCTGGCTGGGCGCACTGCTAAATGCCTTGATTCAT

GTAGTCTACACACTGACTCTCCCTTACTGCATCTCCAGGGAAATACATCATTTCTTTTGC

GAGATCCCAGCCCTGTTGAAACTTGTCTGTGTGTACACTTCCCAATATGAAAAGAGTCTT

TTTGTCAGTGGTGTTATTTTTCTCCTCTCTCCCATCTCAGCCATCATGGCATCCTATGGA

AAAATACTGTCCACCATACTGAGAACCGGCTCAAATGTGAGCCTCAGGAAAACCTTGGCC

ACTTGCTCTTCTCACGTGACTGTAGTGTCTCTATTCTATGGGGCTGCAATCATCAAGTAT

CTTCTGCCAAAGTCCTACCACTCCCCTGAGCAAGATGTGGTGGTCTCTGTCTTCTACACC

ATACTTACACCTGTGCTCAACCCCCTTATCTACAGTCTAAGAAACAAGGATGTCACTAGG

GCCCTTAGGAAAGTTCTCAAAAAATAA

>LoafORs2.1P

GACCTCAGGAATGGTAGCACAGTGTCAGACTTTATCCTCGTGGGCTTTGAACAGAGCTCC

CCTTCTACTCGGTCATTGCTCTTTGCTCTCTTCCTAGCCCTCTACAGCCTGGCCATGGCC

ATGAACGGCCTCATCATCTTCATTGCCGGGACAGACCCCAGGCTCAACAGCCCCATGTAC

TTCTTCCTTGGCCACCTGTCCTTCCTGGATGTCTGTTTCATCACCACCACCATCCCACAG

ATGCTGATCCACCTGGTGGTCAAGAACCACACTGTCTCCTTCGCCTCTTGCATGACCCAG

ATGTACCTAGTCTTCTGTGTGGGTGTGGCTGAGTGCATCCTCTTGGCTTTTATGGCCTAT

GACCGTTATGTTGCTATCTGCTACCCACTTAGCTATACCCAGATCATGGGCCGGCAGGTC

TGTGTGAGGCTGGTGGGTACTGCCTGGTCATTTGGGCTGATCAATGGCATCTTTCTTGAG

TATATGTCATTCCGAAATCCTTTCTGCAGGGACAACCATATAGAAAACTTCTTCTGCGAG

GCTCCCATAGTGATTGCTCTCTCCTGTGGGGACCCCCAATTCAGCATGAAGGTTATCTTT

GTTGATGCCATTGTGGTGTTGCTCAGCCCCATGGTGCTCATTGTCATCTCCTATGCCCGC

ATCCTGGCCTCCATCCTTAGCAGAGCCTCCTCCTCGGGTCGGGGAAAGACCTTCTCCACT

TGTGCCTCCCACCTGACTGTGGTCATCTTCTTCTATACCTCTGCCATGTTCTCTTACATG

AACCCCCGCAGCACACATGGGCCTGACAAGCCTTTCTCCCTCCTCTACACCATCATCACT

CCCATGTGCAACCCCATCATCTATAGTTTCCGCAACAAGGAAATGAAGGGGGCCATGGTG

AGAGCCCTGGGGAGGACCAGCCTGGCACAGGCAGAGTCTGTG

>LoafORs2.2

ATGATGGACCTCGGGAATGGTAGCACAGTGTCAGACTTTATCCTCATGGGCTTTGAGCAG

AGCTCCCCTTCCACTCAGGCATTGCTCTTTGCTCTCTTCCTAGCCCTCTACAGTCTGGCC

ATGGCCATGAACGGCCTTATCATCTTCATCACTGGAAGAGACCCCAGGCTCAACAGCCCC

ATGTACTTCTTCCTTGGCCACCTGTCCTGCCTGGATGTCTGTTTCATCACCACCACCATC

CCACAGATGCTGATCCACCTGGTGGTCAAGAACCACACTGTCTCCTTCACCTCCTGCTTG

ACTCAGATGTACCTAGTTTTTGGTGTGGGTGTGGCTGAGTGCATCCTCTTGGCTTTTATG

GCCTATGACCGTTATGTTGCTATCTGCCACCCACTTAGCTATACCCAGATCATGGGCCGG

CAGGTCTGTGTGAGGTTGGTGGGTACTGCCTGGTCATTTGGGCTGATCAATGGCATCCTT

CTTGATTATATGACCTTTCATGGTCCATTCTGTAGAGACAACCATATAGAAAACTTCTTT

TGTGAGGCTCCCATAGTGATCACTCTCTCTTGTGGGGACCCTCAGTTTAGTCTAATGGTG

ATCTTTGCGGATGCCATTGTGGTGCTGCTCAGCCCCGTGGTGCTCATTGTCATCTCCTAT

GCCCGCATCCTGGCCTCCATCCTCAGTAGAGCCTCCTCCTCAGGTCGGGGAAAGACCTTC

TCCACTTGCGCTTCCCACCTGACTGTGGTCATCTTCTTCTATACCTCTGCCATGTTCTCT

TACATGAACCCCCGCAGCACACATGGGCCTGACAAGGACAAGCCTTTCTCCCTCCTCTAC

ACCATCATCACCCCCATGTGCAACCCCATCATCTACAGTTTCCGCAACAAGGAAATGAAG

GGGGCCATGGTGAGAGCCCTGGGGAGCACCAGCCTGGCCCAGGCAGAGTCTGTGTAA

>LoafORs2.3P

ATGAAAAATGTCAGCACTATTACTGAGTTTGTCCTCCTGGGATTGTCCAGTGACTCCCAG

GTGCAGACTCTCCTCTTCATGATGTTCCTGGTGATTTACCTCCTGACCTTGTTGGGGAAC

GTGGTAATGATCCTTGTGATCAGGGTTGATTCTCACCTCCACACCCCAATGTACTCCTTC

CTTGGACATTTGTCCTTCCTGGATCTCAGCTTCTCCTCAGTCACCGTGCCCAAGATGCTG

CAGAACTTCTTGTCTCAGAAGAAAAACATCTCAGTGTGGGGCTGCATTACCCAGAGTTTC

TTTTTCACTCTCTCTGGGGGAACCGAAGCCTGTCTGCTGTCTGCCATGGCCTATGACTAC

TATGCTGCCATCTGCTACCCTCTGGTCTACACTATGGTCATGAACAGGCCTTTCTGCAGT

GTAATTGTGAGCACAATTTGGGCAGTGGGGTTTCTGATCTCCTTTATAAACAGTCTCTTC

ATCCACAACTTACATTTT/TTTTGTGGGCCCAACATTATCCCTCACTTCAGTTATGAGCT

GCCTCCACTCTTCCTGCTGTCCTGCACTGATCCTACTGCCAATGAGATTCTTCTAGCTAT

GTTATGTGCATTCATGGGGCTGCTGACACTTCCCCTGATCCTCTTCTCTTACTCCAGAAT

CATCTCTGCTATACTGAGCATTCACTCTCGTAAGGGTCAAGGCAAAGCCTTCTCCACCTG

CTCCTTGCACCTCACTGTGGTGTTCTTATTCTATGGGACAACACTTTTCTAGTACCTAAG

CCCCACTTTGGGCTTCATGTTGGAGCAAGTGGTCTCCATTCAGTACAGTGTGATCACATC

CTTGCTGAACCTCATCAACTACAGCCTCAAGAACAAGGAGGTAAAGGTAGCACTGCAAAG

GATGCTCAGGCAGCAAATGTTTTCCTCC

>LoafORs2.4

ATGCTCTTTGTGCTCTTCCTGGTGATCTACCTTCTGACCCTGATGGGGAACCTGATGATG

CTGCTGGTGATTAGGGGTGATTCCCACCTCCACACCCCCATGTACTTCTTCCTTGGACAC

CTATCTTTCCTAGACGTCTGCTACTCCTCAGTCACTGTGCCCAAGATGCTGCAAAATTTC

CTGTCTCAGAAGAAAACCATCTCAGTGTGGGGATGCATCACTCAAGGCTTCTTTTTCATT

CTTTCTGGAGGCACAGAGGGCTGCTTGCTCTCTGCCATGGCCTATGACCACTATGCCGCC

ATCTGCCACCCTCTGCTCTACCCTGTTGTCATGAACAGGCCTCTCTGCACTGCAACGGTC

AGTGCAGCATGGGCGATTGGCTTCCTGAACTCACTAGTGAACAATCTTTGTATTAGGAGC

TTACAGTTCTGTGGGCCCAATATCATCCCCCACTTCAGTTGTGAACAGCCTTCCCTCTTT

GCTCTGTCCTGCACTGATCCCACTGCCAACACCATTCTTCAAGCTGGGTTCGCTGCATTT

CTAGGACTTGTGACCCTTTCCTTGATCCTCTTCTCATACTCAAAAATCATGTTTGCCATA

CAAACTATCTCCTCCTCTGGGGGCCAAAGCAAAGCCTTCTCCACCTGCTCCTCCCACCTC

ACCGTGGTGCTCTTGTTCTATGGGACGGCTCTATTCAGGTACATCAGCCCTCCCTCAGGA

TCAGTCCTAGGGCGAGTGGTATCTATTCAGTACTGTGTGATCACATCTTTGCTGAACCCC

CTCATCTACAGCCTCAAGAACCAGGAAGTGAAGGCAGCTCTGCAGAGGGTGCTGAGGCAG

CAAATATGTGTCTCAGGGTAA

>LoafORs2.5

ATGGAATTTATGAACAACCTCACTGTCTTCACTGAGTTCATCCTCCTCGGACTGTCTGCT

AAACCCTACCTTCAGGTTCTGCTCTTCGTGCTCTTCCTGTTGATTTACCTCCTGACCTTG

CTGGGGAACCTGGTGATGATCCTGGTGATTAGAGCTGATTCTCACCTCCACACCCCCATG

TACTTCTTTCTTGGACATCTGTCCTTCCTGGATCTCAGCTTCTCCTCAGTCACCGTGCCC

AAAATGCTGCAGCACTTCCTGTATCTGAAGAAAAGCATCTCAGTGTGGGGCTGCATCACC

CAGAGTTTCTTTCTCACTCTCTCTGGGAGTACCGAAGCCTGTCTGCTCTCTGCCATGGCC

TATGACCGCTACATCGCTGTCTGCCACCCTCTGCTCTACACCGTGGTCATGAACAGGCCT

CTCTGCACTGCAATGGTCAGTGCAGCATGGGGGATGGGGTTTCTGAACTCACTAATAAAT

AATCTTTTCAGCCGCAAGTTACATTTCTGTGGGTCCAACATCATCTCCCACTTCAGCTGT

GAGCTGCCATCACTGTTCCTGCTGTCCTGCACTGATCCCACTGCCAACAAGTTGCTTCTC

TCTGGGTCAACTACATTTCTGGGGCTGCTGACATTTCCCCTGATCATCTTCTCTTACTCC

AGAATCATCTCTGCCATCCTGAGCATCCCCTCCTCTGGAGGCCAAGGCAAAGCCTTCTCT

ACCTGCTCCTCCCACCTCACCGTGGTGCTCTTGTTCTATGGGACAGCTCTCTTCAGGTAC

ATCAGCCCTCCTTCAGGCTCATTGTTGGAGCGAGTAGTCTCCATTCAGCACACTGTGATC

ACATCCTTGCTGAACCCTGTCATCTACAGCCTCAAGAATCAGGAGGTAAAAGCAGCTCTG

CAGAGGATGCTGAGGCAGAAAATGTCTTCCTCAGAAGAGGGCATCTCTGTGTGGTGTTCA

GTCAGAGAATGGGGAGAAGGGATCTTCAGAAACAGAAACACCTTCTGA

>LoafORs2.6

ATGGGAAACCACAGTGTATTCAGTGAATTTATCCTCCTTGGGCTATCTTCCGATCCTCAG

ACCCAGGCTCTTCTCTTCTTGCTCTTCCTGGTGATTTACCTCCTGACCTTGATGGGAAAC

CTGGTGATGCTGCTGGTGATCAGGGCTGATTCCCACCTCCACACACCCATGTACTTCTTT

TTGGGACAACTGTCCTTCCTGGACCTCTGCCACTCTTCTGTCACCGTACCCAAGATGCTG

GAGAATCTGCTTTGTGAAAGCAAAACCATCTTTGTACAGGGCTGCCTGGCTCAGGCCTTC

TTTGTGTTTGCCACAGGAGGCACCGAGGCCTTTTTGCTGGCAGTGATGGCCTATGACCGC

TATGTGGCCATCAGCTCCCCGCTGCTCTATGGTCAGGTGATGAGTAACCAGCTGTGTGTC

GGGTTGGTATGGGGCTCCTGGGGCCTGGCCTTTGTTGATGCTCTCATCAATATCCTTCTG

GCTGTCAATTTAGATTTTTGTGAGGGCCAGACTATCCCCCATTTCAGCTGTGAGCTGTCT

TCTCTCTTCCCTCTGTCTTGCTCTGATACCTCCATCAACTTCACGCTCCTGCTCTGCTCC

TCCGTCTTGCATTTCTTTGGAACCTTTGTCTTGATTTTCTTCTCCTACACTCGTATTGTC

TCCACCATTATGAACATCAGCTCCACCTCCAGCAGAAGCAAGGCCTTCTCTACCTGTTCC

TCCCACCTCACTACTGTGATCTTCTTCTATGGCTCAGGTTTCCTCAGCTATCTGTTACCA

ACCTCAGGTTCCCCCCTAGAGATGATCTTCCCTTTGCAGTACAGTGTGGTCACTCCCATG

CTAAATCCCCTCATCTACAGCCTCCAGAACAAGGAGGTGAAGGCAGCTATGAGAAGAATG

TTCAGAAAATACATAAACTCTTTCACATAG

>LoafORs2.7

ATGAAAAACTTTAGTGCTATCAGTAAGTTCATTCTCCTTGGACTGCCTACTGACCGCCAC

ATTCAGGCTATCCTATTTGTACTGTTCCTTCTCATTTACCTCCTCACTCTAACAGGGAAC

TTCTTGATGCTCCTAGTGATCAGGGCTGATTCTCACCTCCATACCCCCATGTACTTCTTT

TTGAAACAACTGTCCTTCCTGGACCTCTGCCACTCTTCTGTCACAGTCCCCAAGATGTTA

CAGAATCTACTTTATGAAAGCAAAACCATCTTTGTACAGGGCTGCCTGGCTCAGGCCTTC

TTTGTGTTTGCCACGGGGGGCACTGAGGCCTGTCTGCTGGCAGTGATGGCCTATGACCGC

TATGTGGCCATCAGCTCCCCGCTGCTCTATGCTCAAGTGATGAGTAACCAACTGTGTGTC

AGGCTGGTATGGGGCTCCTGGTGCCTGGCCTTTGTTGATGCTCTCATCAATATCCTTCTG

GCTGCCAATTTAAACTTTTGTGAGGGCCAAACTATCCCCCACTTCAGCTGTGAGCTGTCT

TCGCTCTTCCCTCTGTCTTGCTCTGATACCTCTGTCAACTTTATGCTGCTGCTCTGCTCC

TCTGTCCTGCATTTCTTTGGAACCTTCATCATGATTGTTTCCTCCTATGCACGCATTGTC

TCCACCATCATGAGCATCACCTCCACCTCCAGCAGAAGCAAGGCCTTCTCCACCTGCTCT

TCCCACCTCGCTACTGTGATATTTTTCTATGGCTCAGGTTTTATCAGTTATCTCTTGCCA

ACCTCGGGCTCCCCGCTGGAGATAATCTTTTCATTGCAATATAGTGTAATCACACCCATG

CTGAATCCCCTCATCTACAGCCTCCAGAACAAGGAGGTGAAGGCAGCTATGGAAAGAATG

TTCAGAAAATATTTTCATCCTCTCATGTAG

>LoafORs2.8

ATGAAAAACCACAGTGCTGTCTCCGAGTTCATCCTCCTTGGGCTGCCTATTGATCCCCAG

ATCCAGACTCTGCTTTTTGTGTTATTCTTGGTGATTTATCTCTTAACCATGATGGGAAAC

TTGATGATGCTGTTGGTGATCAAGGCTGATTCTCACCTCCACACACCCATGTACTTTTTC

CTGGGACAACTGTCCTTCCTGGATCTCTGTCACTCATCTGTTACGGTACCCAAGCTGCTA

GAGAACCTACTGTCTGAGAAAAAAACCATCTCAGTAGAGGGCTGTCTGGCTCAGGTCTTC

TTTGTGTTTGCCACTGGGGGCACCGAATCCTGCTTACTGGCTGTTATGGCCTATGACCGC

TATGTTGCCATCAGCTCTCCTCTACTGTATGGCCAGATCATGAACATGCAGCTCTGCGCG

GGGCTTGTGTGGGGTTCGTGGGGCTTAGCTTTTCTGGATGCTCTCATCAATATCCTTGTG

GCTCTCAATTTAAACTTCTGTGATGGTCACAATATCCACCACTTCAGCTGTGAGCTCCCT

TCCCTCTATCCTTTGTCTTGCTCTGATATTTCTGCAAGTTTTACTGCCCTTCTCTGCTCC

AGTCTTGTGCATTTCTTTGGAAATTTCCTCCTGATCTTTTTCTCCTACGTTCGCATTATC

TCCACCATCCGGAGCATCAGCTCCACCACAGGTAGAAGCAAGGCCTTCTCCACCTGCTCG

TCCCACCTCACTGCCGTGAGCTTCTTTTATGGCTCGGGATTGCTCCGCTATCTCATGCCA

AACTCAGGATCCACTCAAGAGTTAATTTTCTCCCTGCAGTACAGTGTGATCACTCCCATG

CTGAACCCCCTCATCTATAGCCTAAAGACAAGGAGTGAAGGCAGCAGTGAGAAGAACATG

AGAAATGTTTCTAGTGTTTTAAATAATAGACTACATGTCAGAATGATGAGGAAACTGGGT

ATTACTGCAATATGCAGTGCCTGGATATTATGGAGAATTCTCCAATATCGGAATCTGCAA

GATAAGTTACACCTTCTTTTTCTGAAACGTATTTTTTAA

>LoafORs2.9

ATGGCCTTGAGGAACCACAGCACCATCACCGAGTTCATCATCCTTGGGCTGTCTGCTGAC

CCCAAGATCCAGGCTCTACTCTTTGTGCTCTTCCTGGGGATTTACCTCCTGACCATGCTG

GGGAACCTGATGATGCTGCTGGTCATCAGGACTGATTCTCACCTCCACACACCCATGTAC

TTCTTCCTGAGTCACCTCTCTTTTATTGACCTCTGCTTCTCTTCAGTCACCATGCCCAAG

ATGCTGGAGAACCTTCTGTCTCAGAAGAAATCCATCTCAGTAAGGGGCTGCCTGGCTCAG

ATATTCTTTGTGTTTATCACTGGAGGGACTGAAATCTGTCTTCTTTCGGTGATGGCTTAT

GACCGCTATGCTGCCATCTGCCACCCTCTGCTCTATGGCCAGGTGATGAGTAAACAGTGG

TGTGCGCAGCTTGTGTGGGGCTCATGGGGTCTAGGGTTTCTGGACACAGTCATCAATGTC

CCTCTGGCAATGAAAATGGACTTCTGTGATACCTACATCATCCCACACTACAGCTGTGAG

TTACCCTCTATATTCCTTCTGTCTTGCTCCGATGTCTCCACCAACTTCCTTGTCATGCTC

TGTTCCACCATCCCACATGCACTTATAACTTTCCTTTCAATCTTTTTCTCTTACATCTGC

ATCATCTTCACCATCCTTAGCATCACCTCTACTTCCGGCAGAAACAAGGTGTTCTCCACG

TGCTCCTCCCACATCGCTGCAGTGATCTTCTTCTATGGGTCAGTTTTTCTCCGCTATTTC

ATTCCAACCTCAGGGTCGTCCCTTAAGTTGATCTTCTCTGTGCAATACAGTGTGATCACT

CCCATGCTAAACCCCCTCATCTACAGTCTGAAGAACAAGGAGGTGAAGGCAGCTGTGAGA

AGAACACTGGAAAAGTATTTACAATATGTTCAATGGCAGAATAAAGGGAAAGGATGA

>LoafORs2.10P

ATGGCCTTGAGGAACCACAGCACCATCACCGAGTTCATCCTCCTTGGACTGTCTGCTGAC

CCCAGGATCCAGGCTCTACTCTTTGTGTTCTTCCTGGGGATTTACCTCCTCACGATGTTG

GGGAACCTAATGATGATATTGGTCATCATAACTGATTCTCACCTCCATACACCCATGTAC

TTCTTCCTGAATCACCTCTCTTTTATTGATCTTTGCTTCTCTTCGGTCACTGTGCCCAAA

ATGCTGGAGAACCTTCTGTCTCAGAAGAAAGCCATCTCAGTAAGGGGTTGCCTAGCTCAA

ATATTTTTTGTGTGTATCACTGGAGGGACTGAAATCTGTCTTCTCTCAGTGATGGCCTAT

GACCGCTATGCTGCCATCTGCCACCCTCTGCTCTATGGCCAGATGATGAGTAAACAGCGG

TGTGTGCAGCTTGTGTGGGGCTCATGGGGCCTGGGCTTTCTGGACACAGTCATCAATGTC

CCTCTGGCAATGAAAATGGACTTCTGTGATATCTACATCATCCCACACTATAGCTGTGAG

TTGCCCTCTATCTTCCTTCTGTCTTGCTCTGATGTCTCCACCAACTTCCTTGTCATGCTC

TGTTCCACCATCCCACATGCACTTATAACTTTCCTTTCAATTTTT/TTTTTCTCTTACAT

CTGCATCATCTTCACCATCCTTAGCATCACCTCTACTTCCAGCAGAAGCAAGGCATTCTC

CACGTGCTCCTCCCACCTCACTGCAGTGATCTTCTTCTATGGGTCAGTTTTTCTCCGCTA

TTTCATTCCAACCTCAGGCTCAGCCTTTGAGTTGATCTTCTCTGTGCAGTATGGTGTGAT

CACTCCCATGCTGAATCCCCTCATCTATAGCCTGAAGAACAAGGAGGTGAAGGCAGCTGT

GAGAAGAACACTGGCAAAGTATTTACCATGCTTTCAGTGGCAGAATAAAGAGAAAGGG

>LoafORs2.11P

ACAGCACTCACCAAGTTCATCCTCCTTGAGCTGTCTGCTGACCCCCAAATCCAGCCTCTA

CTTTTTGTGCTCTTCCTGGGGATTTACCTCCTGACCCTGCTGGAGAATCTAATGATGCTG

CTGGTAATCAGAACTGATTCTTGCCTCCACACACCCATGTACTTTTTTCTGAGTCACCTC

TCTTTTACTAATCTCTGCTTCTCTTAAGTCACCTTGCCCAAAGTGTGGGAGAACCTCCTA

TCTCAGAAGAAAGCCATCTCAGCAAGGGGCTGCCTACCTCAAATATTTTTTGTGTGCATC

ACTGGAGGGACTGAAATCTGTCTTCTCTCAGTGATGGCCTGTGACTGCTATGCTGCCATC

TGCCACCCTCTGCTCTATGACCAGATGATGAGCGAACAGCAGTGTATACAGCTTGTGTGG

GGCTCATGGGGCCTGGGTTTC/TTTCTGGACACAGTCATCGGTGTCCCTCTGGCAATGAA

AATGGACTTCTGTGATACCTACATCATCCCATACTACAGCTGTGAGTTGCCCTCTATCTT

CCTTCTGCCTTGCTCTGATGTCTCCACCAACTTCCTTGTCATACTGTGTTCCACCATCCC

ACATGCACTTATAACTATTCTTTCAATCTTTTTCTCTTACATCTGCATCATCTTCACCAT

CCTTAGCATCACCTCCACTTCTGGCAGAAACAAGAACTTCTCCACGTGCTCCTCCCACGT

CACTGCAGTGATTTTCTTCTATGGGTCAGTTTTTCTCCAGTATTTCATGCCACCCTCAGG

CTTGCCCCTTGAGTTGATCTCTGTGCAGTAT

>LoafORs2.12P

ATGGCATTGAGGAATCACAGCACCATCACTGAGTTCATCCTTCTTGGGCTGTCTGCTGAC

CCCAAGATCCAGGCTCTACTCTTTGTGCTCTTCCTGAGGATTTACCTCCTGACCATGCTG

GGGAACCTGATGATGTCGCTGGTAATCAGGGCTGATTCTCACCTCTACTCACCCATGTAC

TTCTTCCTGAGCCACTTCTCTTTCATTGATCTCTGCTTCTCATCAGTCACCTTGTCCAAG

ATGCTGGAGAACTTCCTGTCTCAGAAGAAAACCATCTCAGTAAGGAGCTCCGTGGCTCAA

ATATTCTTTGTGTTTATCACTGGAGGGACTGAAATCTGTCTTCTCTCAGTGATGACCTAT

GACTGCTATGCTGCCATCTGCCACCCTCTGCTCTATGGCCAGATGATGAGTAAACAGCGG

TGTGTGCAGCTTGTGTGGGGCTCATGGGGCCTGGGCTTTCTGGGCACAGTCATCAATGTC

CCTCTAGCAATGAAAATGGACTTCTGTGATACCTACAACATCCCACTCTATAGCTGTGAG

TTGCCCTCTATCTTCCTTCTGCCTTGCTCTGATGTCTCCACCAACTTCCTTGTCATACTG

TGTTCCACCATCCCACATGCACTTATAATTATCCTTTCAATCTTTTTCTCTTACATCTGC

ATCATCTTCACCATCCTTAGCATCACCTCCACTTCTGGCAGAAGCAAGACCTTCTCCTCA

TGCTCCTCCCACCTCATTGCAGTGATCTTCTTCTATGGGTCAGTTTTTCTCCAGTATTTC

ATGCCA

>LoafORs2.13

ATGGCCTCAAGGAACCACAGCACCATCACCGAGTTCATCCTCCTCGGGCTGTCTGATGAC

CCCAAGATCCAGGCTCTACTCTTCGTGCTCTTCCTGGGGATTTACCTCCTGACCATGCTG

GGGAACCTGATGATGCTGCTGGTCATCAGGACTGATTCTCACCTCCATACACCCATATAC

TTCTTCCTGAGTCACCTCTCTTTAATTGATCTCTGCTTCTCTTCAATCACTGTGCCCAAA

ATGCTAGAGAACCTCCTATCTCAGAAGAAAACCATCTCAGTAAAGGGTTGCCTGGCTCAA

ATATTCTTTGTGCTTATCACTGGAGGGACTGAAATCTGTCTTCTCTCAGTGATGGCCTAT

GACCGCTATGCTGCCATCTGCCACCCTCTGCTCTATGACCAGATGATGAGCGAACAGCAG

TGTATGCAGCTTGTGTGGGGCTCATGGGGCCTGGGCTTTCTGGACACAGTCATCAATGCC

CCTCTGGCAATGAAAATGGACTTCTGTGATACCTACATCATCCCGCACTATAGCTGTGAG

TTGCCCTCTATCTTCCTTCTCTCTTGCTCTGATGTCTCAACCAACTTTCTTGTCATGCTC

TGCTCTGTTATCCCACATGGACTTACAACATTACTTTTAATATTTTTCTCTTATGTCTGC

ATCATCTTCACCATCCTTAACATCACCTCCACTTCCAGCAGAAACAAGGCCTTCTCCACG

TGCTCCTCCCACCTCACTGCAGTGATCTTCTTCTATGGGTCAGCTTTTCTCCGCTATTTC

ATGCCAACCTCAGGCTCTCCCCCTGAGTTGATCTTCTCTGTGCAGTATGGTGTGATCACC

CCCATGCTAAACCCCCTCATATACAGCCTGAAGAACAAGGAGGTGAAGGCAGCTGTGAGA

AGAACCCTGGGGAAGTGTTTACAGTGTTTTCAATGGTAG

>LoafORs2.14P

ATGGCCTCGAGGAACCACAGTACCATCACCGAGTTCTTCCTCCTTGGGCTGTCCGCTGAC

CCCAAGATCCAGGCTCTACTCTTTGTGCTCTTCCTGGGGATTTACCTCCTGACCATGCTG

GGGAACCTGATGATGCTGCTGGTCAACAGGACCGCTTCTCACTTCCACTCACCCATGTAC

TTCTTCCTGAGTCACCTTTGCTTCTCTTCGGTCACAGTACCCAAGATGCTGGAGAATCTT

CTGTCTCAGAAGAAAGCCACCTCAGTGAGGGGCTGCCTGGCTCAGATAGTCTTTGTGTTT

ATCACTGGAGGGACTGAAGCCTGTCTTCTTTCGGTGATGGCCTATGACTGCTATGCTGCC

ATCTGCCACCCTCTGCTCTATGGCCAGGTGTTGAGTAAACAGTGGTGTGTGCAGCTTCTG

TGGGGCTCATGGGGCTTGGGCTTTCTGGACACAGTCATTAATGTCATTCTGGCAAAGAAA

ATGGACTTCTGTGATACCTACATCATCCCACACTATAGCTGTGAGTTGCCCTCTATCTTC

CTTCTGTCTTGCTCTGATGTCTCCACCAACTTCCTTGTCATGCTCTGCTCTATTATCCCA

CATGGACTTACAACTTTCCTTTTAATATTTTTCTCTTATGTCTGCATCTTCACCATCCTT

AGCATCACTTCCACTTCTGGCAGAAGCAAGGCATTTTCCACCTGTTCCTCCCACCTCGCT

GCAGTGATCTTCTTCTATGGGTCAGGTTTTCTTCAATATTTCATGCCATCCTCAGGCTTG

GCCCTTGAGTCGATCTTCTCTGTGCAGTATGGTGTGATCACACCCATACTGAATCCCCTC

ATCTACAGCCTGAAGAACAAGGAGGTGAAGGCAGCTGTGAGAAGAACACTGGGAAAGTAT

TTACAATGTTTGCAATGGTAGAATAAA

>LoafORs2.15P

GCCTTGAGGAACCACAGCACCATCACCGAGTTCATCCTCCTTGGGCTGTCTGCTGACCCC

AAGACCCAGGCTCTACTCTTTGTGCTCTTCCTGGGGATTTACCTCCTGACAATGCTGGGG

AACCTGATGATGCTGCTGGTCATCAGGACTGATTCTCACCTCCACACACCCATGTACTTC

TTCCTGAGTCACCTCTCTTTTATTGATCTCTGTTTTTCTTCAGTCACCGTGCCCAAGATG

CTGGAGAACCTTCTGTCTCAGACGAAAACCATCTCAGTAAAAGGCTGCCTGGCTCAAATA

TTCTTTCTGCTTGCCACTGGAGGGACTGAAACCTGTCTTCTCTCGGTGATGGCCTATGAC

CGCTATGCTGCCATCTGCCACCCTCTGCTCTATGGCCAGGTGACGAGTAAACAGCAGTGT

GTGCAGCTTGTGTGGGGCTCATGGGGTCTGGGCTTCCTGGAAACACTCATCAATGTCCCT

CTGGCAATGAAAATGGACTTCTGTGGTAACTATACCATCCCACACTATAGCTGTGAGTTG

CCCTCTATCTTCTTTCTGTCTTGCTCTGATGTCTCCACCAGCTTCCTTATCATGTTCTGC

TCTGTTATCCCACATGGGCTTATAACCTTCCTTTCAATCTTTTTT/TTTTTCTCTTATGT

CCGCATCATCTTCACCATCCTTTGTATCACCTCCTTTTCTGGCAGAAACAAGGCATTCCC

TACATGCTCCTCCCACCTCACAGCAGTGGTCTTCCTCTATGGGTCAGTTTTCCTCCGCTA

TTTCATGCCAACCTCAGGCTCTCTGCTTGAGTTGATCTTCTCCGTGCAGTACAGTGTGAT

CACACCCATGCTGAATCCTCTCATCTACAGCCTGAAGAACAAGGAGGTGAAGGCAGCTCT

GAAAAGAACACTGGGAAAGTATTTGCAATGTTTTCAA

>LoafORs2.16

ATGGCCTCAAGGAACCACAGCACCATCACCGAGTTCACCCTCCTTGGGCTGTCTCCTGAC

CCCAAGATCCAGGCTCTACTCTTTGTGCTCTTCCTGGGCATTTACCTCCTGACAATGCTG

GGGAATCTGATAATGCTGCTGGTCATCAGGACTGATTCTCACCTCCACACACCCATGTAC

TTCTTCCTGAATCACCTCTCTTTTATTGATCTCTGCTTCTCTACGGTCACCGTGCCCAAA

ATGCTGGAGGACCTTCTATGTCAGAAGAAAGCCATCTCAGTAAAGGGTTGCCTGGCTCAA

ATATTCTTTCTGCTTGCCACTGGAGGGACTGAAATCTGTCTCCTCTCAGTGATGGCCTAT

GACCGCTATGCTGCCATCTGCCACCCTCTGCTCTATGACCAGATGATGAGTGAACAGCGG

TGTGTGCAGCTTGTGTGGGGCTCATGGGGTTTGAGCTTTCTGGACACAGTCATCAATGTT

TCTCTGGCAATGAAAATGGATTTCTGTGATACCTACATCCCACACTACAGCTGTGAGTTG

CCCTCTATCTTCCTTCTGTCTTGCTCTAATGTCTCCACCAACTTCCTTGTCATGCTCTGC

TCTATTATACCACATGGACTCATAACTTTGTTTTTAATATTTTTCTCATATGTCTGCATC

ATCTTCACCATCCTTAGCATTACCTCCACTTCCGGTAGAAAAAAGGCATTCTCCACGTGC

TCCTCCCACCTCACTGCAGTGATCTTCTTCTATGTGTCAACTTTCCTCCGCTATTTCATG

CCAACCTCAGGCTCTCCCCTTGAGTTGATCTTCTCTGTGCAGTATGGTGTCATGACTCCC

ATGCTAAACCCCCTCATCTACAGCCTGAAGAACAAGGAGGTGAAGGCAGCTGTGAGAAGA

ACACTGGGGAAGTGTTTACGTCGTTTTCAATGGTAG

>LoafORs2.17P

TCTCGCCTCCACACACCCATGTACTTCTTCCTGAGTCACCTCTCTTTTATTGATCTCTGC

TTCTCTTCAGTCACATTGCCCAAGATGCTGGAGAACCTTCTGTCTCAGAAGAAAACTATC

TCAGTAAGGGCCTGCCTGGTTCAAATATTCCTTGTGCTTATCACTGGAGGGACTGAAATC

TGTCTTCTCTCAGTGATGGCCTATGACCATTATGCTGCCATCTGCCACCCTCTGCTCTAT

GGCCAGATGATGAGTAAACAGTGGTGTGTGCAGCTTCTGTGGGGCTCATGGGCCCTGGAC

TTTCTAATCAATGTCCCTCTGGCAATGAAAATGGACTTCTGTGATACCTACATCATCCCA

CACTACAGCTGTGAGTTGTCCTCTATCTTTCTTCTGTCTTGCTCTGATGTCTCCACCAAC

TTCCTTGTCATGCTCTGTTCCACCATCCCACATGGACTGATAACTTTCCTTTCAATCTTT

TTCTCCTACATTCGCATCATCTTCACCATCCTTAGTATCACCTCCACTTCTGCCAGAAAC

AAGGTGTTCTCCACGTGCTCCTCCCACCTCACTGCAGTGATCTTCTTCTATGGGTCAGGA

TTTCTCCGCTATTTCATGCAAGCCTCAGGCTCGCCCCTTGAGTTGGTCTTCTCTGTGCAG

TACAGTGTGATCACTCCCATGCTAAACCCCCTCATCTACAGCCTGAAGAACAAGGAGGTG

AAGGCGGGTGTGAGAAGAACACTGGGAAAGTATTTACCATGTTTTCAGTAGCAGAATAAA

GAGAAAGGA

>LoafORs2.18

ATGGCCTTGAGGAACCACAGTACCATCACTGAGTTCATCCTCCTTGGGCTGCCTGCTGAC

CCCAAGATCCAGGCTCTACTCTTCGTGCTCTTCCTGGGGATTTACCTCCTGACCATGATG

GGGAACCTGATTATGCTGCTGGTTATCAGGACTGATTCTCACCTCCACACACCCATGTAC

TTCTTCCTGAGTCACCTCTCTTTTATTGATCTCTGCTTTTCTTCAGTCATAGTGCCCAAG

ATGCTGAAGAACCTCCTGTCTCAGAAGAAAACCATTTCAGTAAAGGGCTGCCTGGCTCAG

ATATTCTTTGTGCTTACCATTGGAGGGACTGAAGACTGTATTCTTTCAGTGATGGCCTAT

GACCGCTATGCTGCCATCTGCCACCCTCTGCTCTATGGCCAGGTAATGAGTAAACAGCGG

TGTGTGCAGCTTGTGCGTGGCTCATGGAGCCTGGGCTTTCTGGACACATTCATCAATGTC

CTTCTGGCAATGAAAATGGACTTTTGTGATACCTACATCATCCCACACTACAGCTGTGAG

TTGCCCTCTATCTTCCTTCTGTCTTGCTCTGATGTCTCCACCAACTTCCTTGTCATGCTC

TGTTCCACCATCCCACATGGACTGGTAACTTTCCTTTCAATCTTTTTCTCCTACATTCAC

ATCATCTTCACCATCCTTAGTATCACCTCCACTTCTGGCAGAAACAAGGCATTCTCCACG

TGCTCCTCCCACCTCACTGCAGTGATCTTCTTCTATGGGTCAGCTTTTCTCCGCTATTTC

ATTCCAGCCTCAGGCTCGCCCCTTGAGTTGATCTTCTCTGTGCAGTATGGTGTGATCACT

CCCATGCTGAATCCCCTCATCTACAGCCTGAAGAACAAGGAGGTCAAGGCAGCTGTGAAA

AGAACACTGGGAAAGTATTTACCATGTTTTCAGTGGCAGAATAAAGAGAAAGGATGA

>LoafORs2.19

ATGGCCTTGAGGAACCACAGTACCATTACCAAGTTCATCCTCCTCGGGCTGTCTGTTGAC

TCCAAAATCCAGGCTCTACTCTTTGTGCTCTTCCTGGGGATTTACTTCCTGACAATGCTG

GGGAACCTGATGATGATGCTGGTCATCAGGACTGATTCTCACCTCCACACACCCATGTAC

TTCTTCCTGAGTCACCTCTCTTTTATTGATCTGTGCTTTTCTTCAGTCACAGTGCCCAAA

ATGCTGGAGAACCTCCTGTCTCAGAAGAAAACCATCTCGGTAAGGGGCTGCCTGGCTCAG

GTATTCTTCGTGTTTATCATTGGAGGGACTGAAGCCTGTCTTCTTTCAGCAATGGCCTAT

GATCGCTATGCTGCCATCTGCCACCCTCTGCTCTATGGCCAGATGATGAGTAAACAGTGG

TGTGTGCAACTTGTGTGGGGCTCATGGGGCTTAGGCTTTCTGGACACGCTCATCAATGTC

CCTCTGGCAATGAAAATGGACTTCTGTGATACCTACATCATCCCACACTACAGCTGTGAG

TTGCCCTCTATCTTCCTTCTGTCTTGCTCTGATGTCTCCACCAACTTCCTTGTCATGCTC

TGTTCCACCATCCCACATGGACTGATAACTTTCCTTTCAATCTTTTTCTCCTACATTCAC

ATTATCTACACCATCCTTAGTATCACCTCCACTTCTGGCAGAAACAAGACGTTTTCCACG

TGCTCCTCCCACCTCACAGCAGTGATCTTCTTCTATGGGTCAGCTTTTCTCCGCTATTTC

ATTCCAGCCTCAGGCTCGCCCCTTGAGTTAATCTTTTCTGTGCAGTACAGTGTGATCACT

CCCATGCTAAATCCCCTCATCTACAGCCTGAAGAACAAGGAGGTCAAGGCAGCTGTGAAA

AGAACACTGGGAAAGTATTTATCATGTTTTCAGTGGCAGAATAAAGAGAAAGGATGA

>LoafORs2.20

ATGGCCTCAAGGAACCACAGCACCATCACTGAGTTCATCCTCCTTGGACTGTCTGCTGAC

CCCAAGATGCAGGCTCTACTCTTTGTGCTCTTCCTGGGGGTTTACCTCCTGACCATGCTG

GGGAACCTGATGATGCTGCTGGTCATCAGGACTGATTCTCATCTCCACACACCCATGTAC

TTCTTCCTGAATCACCTTTCTTTCATTGATCTCTGCTTTTCTTCAGTCACAGTGCCCAAG

ATGCTGGAGAACCTCCTGTCTCAGAAGAAAACCATCTCAGTAAAGGGCTGCCCGGCTCAG

ATATTCTTTGTGCTTATCACTGGAGGGACTGAAATCTGTCTTCTCTCAGTGACGGCCTAT

GACCATTATGCTGCCATCTGCCACCCTCTGCTCTATGGCCAGGTGATGAGTAAACAGCGG

TGTGTGCAACTTGTGTGTGGCTCATGGGCCCTGGGCTTTCTGAACAGGCTCATCAATGTC

CCTCTGGCAATGAAAATGGACTTCTGTGATACCTACATCATCCCACACTACAGCTGTGAG

TTGCCTTCTATCTTCCTTCTGTCTTGCTCTGATGTCTCCACCAACTTCCTTGTCATGCTC

TGTTCCACCATCCCACATGCACTTACAACTTTCCTTTCAATCTTTTTCTCCTACATTCAC

ATCATCTTCACCATCCTTAGCATTACTTCCACTACCGGCAGAAACAAGGCATTCTCCACG

TGCTCCTCCCACCTCACTGCAGTGATCTTCTTCTATGGGTCAGGTTTTCTCCTCTATTTC

ATGCCAACCTCAGGCTCAGCCCTTGAGTTGATCTTCTCTGTGCAGTATGGTGTGATCACT

CCCATGCTGAATCCCCTCATCTACAGCCTGAAGAACAAGGAGGTGAAGGCAGCTGTGAGA

AGAACTTTGGGAAAGTATTTACAATGTGTTCAGTGGCAGAATAAAGAGAAAGGGTGA

>LoafORs2.21

ATGGCATTGAGGAACCATAGCACCATCACAGAGTTCCTCCTCCTCGGGCTGTCAGACGAC

CCCCATATTGAGGCTTTCCTCTTTGTGCTTTTCCTGGTGACTTACCTTCTGACCATAATG

GGAAACCTCATGATGCTGCTGGTGATTAGGGCTGATTTGCACCTCCACACCCCTATGTAC

TTCTTCTTGAGTCACCTTTCTTTCGTTGATATCTGCTTCTCTTCAGTCACTGTACCCAAA

ATGCTGGAGAACCTCCTGTCTCAGAGGAAAACCATATCAGTTGAGGGCTGCCTGACCCAG

GTCTTCTTTGTGTTTATCACTGGAGGAACAGAACTCCTTCTGCTCTGTGCCATGGCCTAT

GACCGCTATGCTGCCATCTGCCACCCTCTGCTGTATGGACAGATCATGAGTAAACGGCTG

TATCTGCAGCTTGTGTGGGGCTCCTGGGGACTGAGCTTTCCGGATGCACTCATCAATATC

CTGCTAGCTCTGAACATGGTATTCTGTGAGGCTCAAATCATCTACCATTTTGTCTGTGAG

ATGTCTTCTATCCTCCCTCTGTCCTGCTCTGATGTCTCCAGGAACATCATTGTCTTGCTT

TGCTCCACTCTCCTGCATGGACTGGTAACCTTCCTCTTGGTTTTCATTTCATACGCACAC

ATTATCTCCACCATCCTGAGGATCAGCTCTACATCAGGCAGAAGCAAGGCCTTCTCCACC

TGTTCCTCCCACCTCACTGCAGTGACACTTTACTATGGTTCAGGTGTGCTCCGTCATCTT

ATGCCAAACTCAGGTTCCCTCATAGAGCTGATCTTCTCTGTTCAGTACAGTGTGATCACT

CCCATGCTGAATCCCCTCATCTACAGCCTGAAGAACAAGGAGGTCAAGGCAGCTGTGAGA

AAAACTTTGAAGAAGTATTTGCAAAATATCAGGTGCTTAAATAAAGACAAGAGGTTGGTG

GAGCATTGGGATAAAGCTGCACACAACAAGACACTGGGTGAGTTTAGAGTAAGGAGTACT

CCTGACTACCCACAATGTCTGACACTGAAAGCTAAATGA

>LoafORs2.22

ATGTCCTGGGGGAACCACAGCACCATAAACAATTTCATCCTCCTTGGACTGTCCTCTGAT

CCCAAAATCCAGGCTCTGCTTTTTGTGTTGTTCCTGGGGATTTACCTCCAGACCCTCATG

GTGAACCTGTTGATGTTACTGGTCATCTGGGTGGATTCTTACCTCCATACACCCATGTAC

TTCTTCCTGAGTCACCTCTCTTTCCTGGATCTTTGCTTCTCTTCTACCACAGTGCCCAAG

CTGCTGGAGAATCTCCTGTCTCAAAGAAAAACCATCTCTATGGGGGGCTGCCTAGCTCAA

GTCTTCTTTTTGTTTCACACTGGAGGCACTGAAACCTGCCTACTTGCAGTGATGGCCTAT

GACCGCTATGTTGCCATCTGCCACCCTCTACTCTATGGCCAGATGATGAGCAACCAACTC

TGTAAGGTGCTGGTGTGTGGCTCCTGGAGCCTAGCCTTTCTGGGTGCACTCATCAACATC

CTTCTAGCTATGAACTTGAACTTGTGTGGGGAGAAGCCCATCCCCCACTACAGCTGTGAG

CTGCCCTCACTCTTCCCTCTGTCCTGCTCTGATGTCTCCACCAATTTTACCGTTATGCTC

TGCTCTACCTTCCTGCATGGACTTGGAACCTGTGTCCTGATTGTTTTCTCCTACGCCCTC

ATTGTCTCCACCATCCTGAGCATCAGTTCCTCCACAGGCAGAAGCAAGGCCTTCTCCACC

TGCTCCTCCCACCTCACTGCAGTGCTCCTATTTTATGGCTCAGCTTTCCTTCGCTATGTC

ATGCCAAACTCAGATTCACTACTGGAGTTGATCTTCTCCTTGCAGTACAGTGTGATCATG

CCCCTAGTGAATCCCCTTGTCTACAGCCTGAGGAACAATGAGGTGAAAGCAGCTGTGAGA

AGGACCTTGAGAAACTATCTCCAATATTTCAGGTAG

>LoafORs2.23P

CATCCACCATTACAGCTGTGAAATGTCCTCCATCTGTCCTGCTCTGATGTCTCCAGGAAC

ATCATTTTCTTGCTCTGTTTCACAACCTTGCATAGGCTGGGAACCTTCCTCTTTGTCTTC

TTATCCTGTGCACTCTTTATCTCTATCATCCTGAGCATCAGTTCTACCTCAGACAGAAGC

AAGACCTTCTCCACCTGTTCTTCCTACCTCACTACAGTGACACTTTACTATGGTTCAGGT

GTGCTCCATCATCTTATGCCAAACTCAGTTTCCCTCATGGAGCTGATCTTCTCTGAACAG

TACTGTATGATCACTCCCATGCTGAATCCCCTCATCTACAGCCTAAAGAACAAGGAGGTC

AAGGCAACTGTGAAAAGAACTTTAGAAAAGTATTTTCAACATATCAGGTACTGAAATAAA

GACAAGAGGATGGTGAAGGATTAGGATAAAGTTGCCTGCAACAAGACATTGGGTGAGTTT

AGAGTAAGGAGTACTCCTGACTACCCACAATGTCTGATGCTGCAAGCTAAA

>LoafORs2.24

ATGGCCTTGAGGAACCACAGTACCGTCACTGAGTTCATCCTCCTTGGGCTGTCTGTGGCC

CCCCACGTCCAGGTTCTGCTCTTTGTGCTCTTCTTCATGATTTACCTCCTGACCCTGATG

GGGAACCTCATGATGCTTTTGGTGATCAGGATTGATTCCTACCTCCACACCCCCATGTAC

TTCTTCCTGAGTCACCTCTCTTTCATTGATCTTTGCTTCTCTTCTGTCACTGTCCCCAAG

ATGCTAGAGAACCTCCTGTCTCAGACAAAAACCACATCAGTAAGGGGCTGTCTGGCTCAG

GTCTTCTTTGTATCTTTCACTGCAGGGACAGAAGCCTGTCTTCTCTCAGTGATGGCCTAT

GACCGCTATGCTGCCATCTGCCACCCTCTGCTCTATGGACAGATCATGAGTAAACAGCTG

TATATGCAGCTTGTGTGGGGGTCCTGGGGACTAGGCTTCCTGGATGCACTCATTAATAGC

CTCCTAGCTATGAACTTGGTGTTCTGTGGGGCCCAAATAATCCACCATTTCAGCTGTGAG

ATGCCGTCTATCCTCCCTCTGTCCTGCTCTGATGTCTCCAAGAACATCGTTGCCTTGCTG

TATTCCACTTTCCTGCATGGTCTGGGAACTTTCCTTTTGGTCTTCTTATCCTATGCACAC

ATTATTTCCACCATCTTGAACATCAGCTCTACCTCAGGCAGAAGCAAGGCCTTCTCCACC

TGCTCCTCCCACCTCTCTGCAGTGACACTTTACTATGGCTCAGGTTTGTTGCGTTATCTT

ATGCCAAACTCAGGTTCCCCCATAGAGTTGATCTTCTCTGTGCAGTACACTGTGGTCACT

CCCATGCTGAACCCCCTCATCTATAGCCTGAAGAACAAGGAGGTGAAGGCAGCTATCAGA

AGAACTTTGGGAAAGCATTTTCAACGTATCAGGTGCTGA

>LoafORs2.25

ATGGCCTCGGGAAACCACAGTACTATCATTGAGTTCCTCCTCCTTGGGCTGCCTGTCGGC

CATCACATGCAAACCCTACTCTTTGTGCTTTTCTTGGTAATTTACCTCCTGACCCTGTCA

GGAAATCTGTTGATGATCATGGTTATCAGAGCCAGTTCCCACCTCCACACTCCCATGTAC

TTCTTCTTGAGTCACCTTTCCTTCCTGGATCTCTGTTACTCTTCAGTCACTGTGCCCAAG

ATGCTGGAGAACCTCCTTTCTGAGAAGAAAACCATCTCAGTGGAGAACTGCTTGACCCAG

GCCTTCTTTGTGCTTCACTCTGGGGGAACAGAGCTCTGTCTCCTTGCAGTGATGGCCTAT

GATCGGTATGCTGCTGTCTGCTACCCTCTGATATATGTTCAAATGATGAACAACCAGCTC

TGTGTGAGGCTGGTGTGGGCATCCTGGGTCTTGGCCTTTTTGGATGCGCTCATCAACACA

GTTCTTGCTATGAATTTGGACTTCTGTGAGTCACAAGTCATCCCCAACTTTAGCTGTGAG

ATACCTTCTCTATTCCCTCTATCCTGCTCCAATAGCTCAACTAACTTTTCAGTCCTACTG

TGCTCAGCCCTCCTGCATGCCTTTGGGACCTTCTTCCTGGTTTTCTTCTCTTATGGCCGC

ATTGTCTCCACCATCTTGAGCATCACCTCCACCACAGGCAGAAGCAAGGCCTTCTCCACC

TGCTCCTCCCACCTTACTGCTGTGAGTTTATTTTACAGCTCAGGTTTCCTTCGCTATCTT

ATGCCAACTTCAGGTTCCCCATGGGAACTGATTTTTTTCTTGCAGTATGGTGTGGTCACT

CCCCTAGTGAATCCCCTTGTCTACAGCCTAAAGAACAAGGAAGTAAAAGTAGCTCTGAAA

AACATGCTACGGAAAAGTTTACAGCATCTCAGGTAG

>LoafORs2.26

ATGGATGTGGGAAATCACAGCACCATCCTTGAATTTATCCTCCTCGGGCTGTCTGCTGAC

CCCCATGTCCAGGCTCTGCTCTTTGTGTTGTTCCTGGTAACATACCTCCTGACTCTTATG

GGAAACCTATCGATACTGTTGGTCATCAGGACAGATTCTCACCTTCATACACCCATGTAC

TTCTTCCTGAGTGACCTCTCTTTCCTGGATTTTTGCTTCTCCTCTGCCACACTGCCCAAG

CTGCTGGAAAGTCTTCTGTCACAGAAGAAAATCATCTCTGTGAAGGACTGTATGGCTCAG

GTATTCTTTTTGTTAGACTCTGGGAGCACTGAAGCCTGCCTGCTTACAGTGATGGCCTAT

GATCGTTGTGTTGCCATCTGCCATCCTCTGCTCTATGACCAGATGATGAGCAACCAGCTC

TGTAAGGGGCTGGCTTGGGGTTCCTGGGTCCTGGGCTTTCTAGATGCACTCATCAACATC

CTTCTAGCTATGAACTTGGACTTCTGTGAGAATCAGTCTATCCCCCACTACAGTTGTGAG

TTACCCTCACTCTTCCCTCTGTCCTGCTCTGATGTCTCCACCAGTTTTGCTGTTATGCTC

TGCTCTACTCTTCTGCGTGGACTTGGAACCTGTGTCCTGATTGTTTTCTCCTACACCCTC

ATTGTCTCGACCATCTTGAGCATCAGGTCTTCCACTGGTAAAAGCAAGGCCTTCTCCACC

TGCTCCTCCCACCTCACTGCAGTGCTCCTATTTTATGGCTCAGCTTTCCTTCGCTATGTC

ATGCCAATCTCAAGTTCACCATTGGAGTTGATCTTCTCTGTGCAGTACAGTGTGGTCACT

CCCCTAGTGAATCCTTTCATCTATAGCCTGAAGAACAATGAGGTTAAAGCAGCTCTGAGA

AGAAACTTGAGAAAATATCTCCAATATTTCAGGTAG

>LoafORs2.27

ATGGCCCTAGGAAACCACAGCACCATCACCGAGCTCCTCCTCTTAGGACTCCCTGAGGAT

CCAGATATCCAGGCTCTGCTCTTTTTGTTCTTCTTAGTGATTTACCTTCCGACCTTGATG

GGGAATCTTACAATGCTGCTACTGATCACAACTGACTCTCATCTCCAGTCACCCATGTAC

TTCTTTCTGAGTCATCTCTCCTTCCTAGATCTTTGCTACTCTTCAGTCACTGTGCCCAAG

ATTCTGGAAAACCTCCTGTCTCAAAGGAAATCAATCTCAGTAGAGGGCTGTCTGGCTCAA

GTCTTCTTTCTGCTAGTCACTGGAGGGACAGAAGGACTTTTGCTCTCACTGATGGCCTAT

GATCACTATGCTGCCATATGCCACCCTCTGAAGTATGGACAGATCATGAGTAAACAAATG

TGTAGGGGTCTGATGTGGGCCTCATGGGGACTGGGCTGTCTAGATGCTCTCGCCAACCTC

CTCCTGGCTTTGAATTTGGACTTCTGTAAGCTCCAAACCATCCACCACTATTCTTGTGAG

CTCCCATCCCTCTTCTCTCTCTCCTGCTCTGACACATCCGCCAATGTTGCGATGCTGCTC

TGCTCTTTCATCTTGCATGCCATGGGGACCTACCTCCTTGTCTTCTTCTCCTATGACCAT

ATTGTCTCCACCATTCTGAGCATTAGCTCCACCTCTGGCAGAAGCAAGACTTTCTCCACC

TGCTCCTCCCACCTCACTGCAGTGAGCTTATTCTATGGCTCAGCTTTTCTCCGGTATCTC

ATGCCAACATCAGGCTCCTCACTGGAGTTGATTCTCTCCATACAGTACAGTGTAATTACT

CCCTTACTGAATCCTCTCATCTACAGCCTGAAGAACAAGGAGGTGAAAGCAGCTCTGAAA

AGACTGATGCTAAGATACTTACAATGTCTCAGATAG

>LoafORs2.28

ATGGCCTTAAGAAACAACAGCATCATCACTGAGTTCATCCTCCTTGGACTGTCTGCTGAC

CACCACATCCAAATTCTACTCTTTGTGCTCTTCCTGGGGATTTACCTCATGACCATGATG

GGGAACCTGATGATGCTGCTGGTGATCAGAGTTGATTCTTATCTCCACTTACCCATGTAC

TTCTTCCTAAGTCACCTCTCTTTCATAGATATTTGTTTATCTTCAGTCATTGTGCCCAAG

ATGCTAGAGAACCTCCTGTCTCAGAAGAAATCGATCTCAGTAGAGGGCTGTCTGGCTCAG

GTCTTCTTTGTATTTGCCACCGGAGGGACTGAAGCCTGTCTGCTCTCGGTGATGGCCTAT

GACCGTTATGCTGCTATCTGCTACCCTTTGATCTATGGACAGATCATGAGTAAACAGATG

TGTTGTGGTCTGGTGTGGGCCTCATGGGGATTGGGCTTCCTGGACTCTCTCATCAATATC

TTCCTGGCTTGGAATTTGGACTTCTGTGAAGCTCATGTCATGCCTCACTTTAGCTGTGAA

CTGCCTTCTCTATTCTCTCTGTCCTGCTCTGATGTCTCCGCCAACATTGCAGTCATGATC

TGCTCTGCCATCCTGCATGCCCTTGGAACCCTACTCTTGATCTTCTTCTCTTATGCACGC

ATTATCTCCACCATCCTGAGCATCAGTTCCACCACAGGCAGAAGCCAGGCCTTCTCCACC

TGCTCCTCCCACCTCACTGCAGTGAGCTTCTTCTACGGATCTGCTTTTCTTTGCTATCTA

ATGCCAACCTTGAGTTCCTCATTGGAATTTGTTTTTTCCATGCAGTACAGTGTGGTAACT

CCCCTAGTAAATCCCCTTGTCTATAGCCTGAAGAACAAGGAAGTAAAAGCATCTCTGAAA

AGAATATTGCAAAAAGGTTTTATAAAAGCTCAAATAACAGAGAACAGGCAGAGACTGAAT

GGGAAAAGGGACAGAATTGCATCAAAATAG

>LoafORs2.29

ATGGCCTTAGGGAACCACAGCACCATCACTGAGTTTCTCCTCCTTGGGCTGTCTGCTGAT

CCCAAGATCCAGGCTCTGCTCTTTGTGCTGTTCCTGATGATTTACCTCCTGACCCTGATG

GGGAACCTGATGATGATACTTGTGATCCATACAGATTCTAAACTCCACACACCCATGTAC

CTCTTCCTGAGTCATCTCTCCTTCCAAGATCTCTTCTATTCATCAGTCACGGTGCCCAAG

ATGCTAGAGGACCTCCTGTCTCAAAGGAAAGCCATCTCAGTAGACGGCTGTCTGGCTCAG

GTCTTCTTTATGCTTGCCACGACAGGGATTGAGGCCTGCCTGCTCTCTGTGATGGCCTAT

GATCGCTATGCTGCCATCTGCCATCCTCTGCTCTATGGACAGATGATGAGTAAACAGGTG

TGTGTGAGGTTGGTGTGGGGCTCTTGGGTCGTGGCCTTTCTGGATGCACTCATCAACACC

CTCCTGGCTTTGAATTTGGACTTCTGTGAGCTCCAAACCATCCCCCACTACTCCTGTGAG

CTGCCCTCTCTCTTCCCTCTCTCCTGCTCTGACACGTCCACCAATGCTGCAATGTTGCTC

TGCTCTGCCCTTTTCCATGCCATTGGAACCTGTCTCCTGATCTTCTTCTCCTATGCCCGT

ATTGTCGCCACCATTCTGAGCATTAGCTCCACCTCTGGCAGAAGCAAGGCCTTCATCACC

TGCTCCTCCCACCTCACTGCAGTAAGCTTATTCTATGGCTCAGCTGTTCTCCGATATCTC

ATGCCAACATCAGGCTCTGCACTGGAGTTGGTCCTCTCCATTCAGTACAGCGTAATCACT

CCCCTACTGAATCCTCTCATCTACAGCCTGAAGAACAAGGAGGTGAAACCAGCTCTGGGA

AGAACGATGCTAAGATACTTAAAATGTCTCAGATAG

>LoafORs2.30

ATGGCCTTAGGGAACAACAGCATAATCACTGAGTTCATCCTCCTTGGACTGTCTGCTGAC

CACCACATCCAAGTTCTACTCTTTGTGCTCTTCCTGGGGATTTACCTCATGACCATGATG

GGGAACCTGATGATGCTGCTGGTGATCAGAGTTGATTCTTATCTCTACTCACCCATGTAC

TTCTTCCTAAGTCACCTCTCTTTCATAGATATCTGTTTATCTTCAGCCACTGTGCCCCAA

ATCCTGGAGAACCTCCTGTCTCAGAGGATATCAGTGTCAGTAGAGGGCTGTCTGACTCAG

ATCTTCTTTGTATTTGCCACTGTAGGGACAGAAGTCTGTCTGCTCTCAGTGATGGCCTAT

GACCGTTATGCAGCCATCTGCCATCCTCTAATCTACAGACAGATTATGAGTAAACAGATG

TGTGGGGGTCTGGCATGGGCCTCATGGGGATTGGGCTTTCTGGATGCTCTCATCAATACC

CTCCTGGCTTTGAATTTGGACTTTTGTGAGGCTTGTGTCATGCCTCACTTCAGCTGTGAG

CTGCCTTCTCTATTCCCTCTGTCCTGCTCTGATGTCTCCACCAACTTTGTAATCCTGACC

TGCTCTGCCATCCTGCATGCCCTTGGAACCCTACTCTTGATCTTCTTCTCTTATGCACGC

ATTATCTCCACCATCCTGAGCATCAGTTCCACCACAGGCAGAAGCAAGGCCTTCTCCACC

TGCTCCTCCCACCTCACTGCAGTGAGCTTCTTCTATGGATCAGCTTCTCTCCGCTATCTC

ATGCCAAATTTAAGCTCTTCTTTGGAATTGGTTTTTTCTCTGCAGTACAGTGTGGTCACT

CCCCTAGTGAATCCTCTAGTCTATAGCCTGAAGAACAAGGAAGTAAAGGCAGCTCTGAAA

AGGATGTTGCAAAAGGTTTTACAGCATCTCAGATAG

>LoafORs2.31P

GCCTTGAGGAACCACAGCACTATCACCCAGTTTATCCTCCTCGGACTATCTGCTGACCTC

CATGTCCAGGCTCTATTCTTCGTGCTCTTCCTGGGGATTTACCTCATGACCGTGTTGGGG

AACCTGACGATGCTGCTGGTGATCAGGGCTGATTCCCACCTCCACACACCCATGTACTTC

TTCCTAAGTCACCTCTCTTTCCTGGATCTTGGCTTCTCTTCAGTCGCTGTGCCCAAGCTG

CTGGAGAACCTCCTATCTAAAAGGAAAATCATTTCAATAGAGCGCTGCCTGACTCAGGCC

TTCTTTGTGCTTGATGTTGGAGGAACAGAAATCTTCCTGCTCTGTGCCATGGCCTATGAC

CATTATGCAGCCATCTGCCACCCTCTGGTCTACAGCCAGGTGATGAGCAGCCAGCTGTGT

GTGAATCTAGTATGGGCTTCATGGAGCCTGAGTTTTCTGGACACAGTTATCAACATTCCC

CTGGCTGTGAGCTTGAACTTCTGTAATGCCCATACCATCCCCCACTATAGCTGTGAGCTG

CCCTCTCTCTTCCCTTTGTCCTACTCTGATGTCTCCATCAACATCACTGTCCTGGTCTTC

TCTACACTCCTGCATGGCTTTGGTACATTCTTCCTGATTGTCTTCTCCTACACCCGCATT

GTCTCCACCATCCTGAGCATCAACTCCACTACAGGCAGAAGCAAGGCTTTCTCCCGCTGC

TCTTCCCACCTCACTGCAGTGAGCTTCTTCTATGGATCTGCTTTCCTTTGCTATCTGATG

CCAAAGTCAGGCTCCCCTCTGGAGCTGATCTTCTCCTTACAATATTGTGTGGTCACTCCC

CTAGTGAACCCCCTCGTCTACAGTCTGAAAAATAAAGACGTGAAGGCAGCTGTGAAAAGA

ACCTTGGGGAAATGTTTGCAATGG

>LoafORs2.32

ATGGCCTTGAGGAACCACAGCACCATCACGGAGTTTATTCTCATTGGGCTGTCCACTGAC

CCCCACATTGAGGCTCTGCTATTTTCACTCTTCCTGGTGATTTATCTTCTGACCATGATG

GGGAACTTGATGATGATGCTGGTGATCAGGGCACATTCCTGCCTCCACACTCCCATGTAC

TTCTTCTTGAGTAATCTGTCATTCCTGGACCTTTGTTTCTCTTCTGTCACTCTGCCCAAG

CTGCTGGAAGACCTCCGGTCTGAGAAGAAAACCATCTCAGTAGAGGGCTGCCTGGCTCAA

GTCTTCTTTGTGTTTTTAACTGCAGGAACTGAAGCCTGTCTGCTCTCAGTGATGGCTTAT

GACCGCTATGCTGCCATCTGCCACCCGCTGCTCTATGGCCAGGTGATGAGCAACCAGCGC

TGTGTGAAACTGATGTTGGCCTCATGGGGCCTGGCCTCTCTCAATGCAGTTGTGATTTTG

CTCTTGGCTATTAATATGGACTTCTGTGAAGCCCAGACTATACACCACTTCACCTGTGAG

CTACCCGCTCTCTTCCCCTTGTCTTGCTCTGATATCTCCATCAATATCAATATCCTACTC

AGTGCCAGCTTGCTGCATGGACTTGGAACCATCATCCCAATTTTCTTATCCTACGCACGT

ATTATCTCCACTATCTTGGGCATCAGCTCCACCACAGGCAGAAGCAAGGCCTTCTCCACC

TGCTCCTCTCACCTTATTGCGGTGGTCCTGTTCTTTGGTTCAGGTTTTCTTTGCTATCTC

ATGCCTCCATCTGGTTCCTCCCTGAATGTTCTCATATCTTTGCAGTACAGTGTGGTCACA

CCCCTGATGAATCCACTTATCTACAGCCTAAAAAACAAGGAAGTAAAGGCAGCTGTGAAA

AAGATATTGGGAAAATTTCTATAA

>LoafORs2.33

ATGGCCTTAGGGAACCACAGCACCATCACTGAGTTTCTCCTCCTTGGGCTGTCTGCTGAT

CCCAAGATCCAGGCTCTGCTCTTTGTGCTGTTCCTGATGATTTACCTCCTGACCCTAATG

GGGAACCTGATGATGATACTTGTGATCCATACAGATTCTAAACTCCACACACCCATGTAC

CTCTTCCTGAGTCATCTCTCCTCCCAAGACCTCTTCTATTCGTCAGTCACAGTGCCCAAG

ATGCTAGAGAACCTCCTGTCTCAAAGGAAAGCCATCTCAGTAGATGGCTGTCTGGCTCAG

GTCTTCTTTGTGTTTGCCACGACAGGGATTGAGGCCTGCCTGCTCTCCGTGATGGCCTAT

GATCGCTATGCTGCCATTTGCCATCCTCTGCTCTATGGACAGATGATGAGTAAACAGGTG

TGTGTGAGGTTGGTGTGGGGCTCTTGGGTCGTGGCCTTTCTGGATGCACTCATCAACACC

CTCCTGGCTTTGAATTTGGACTTCTGTGAGCTCCAAACCATCCCCCACTACTCCTGTGAG

CTGCCCTCTCTCTTCCCTCTCTCCTGCTCTGACACGTCCACCAATGCTGCAATGTTGCTC

TGCTCTGCCCTTTTCCATGCCATTGGAACCTGCCTCCTGATCTTCTTCTCCTATGCCCGT

ATTGTCGCCACCATTCTGAGCATTAGCTCCACCTCTAGCAGAAGCAAAGCCTTCTCCACC

TGCTCCTCCCACCTCACTGCAGTAAGCTTATTCTATGGCTCAGCTGTTCTCCGATATCTC

ATGCCAACATCAGGCTCTCCACTGGAGTTGATCCTCTCCATTCAGTACAGTGTAATCACT

CCCCTACTGAATCCTCTCATCTACAGCCTGAAAAACAAGGAGGTGAAAGCAGCGCTGAGA

AGAATGATGCTAAGATGCTTACGATATCTCAGATAG

>LoafORs2.34P

ATGGCCTTAGTGAACAACAGCATCATCACTGAGTTCATCCTCCTTGGACTGTCTGCTGAC

CACCACATCCAAGTTCTACTCTTTGTGCTCTTCCTGGGGATTTACCTCATGACCATGATG

GGGAACCTGATGATGCTGCTGGTGATCAGAGTTGATTCTTATCTCTACTCACCCATGTAC

TTCTTCCTAAGTCACCTCACC/CACCTCTCTTTCATAGATCTTTGTTTATCTTCAGTCAC

TGTGCCCCAAATCCTGGGGAACCTCCTGTCTCAAAGGATATCAGTGTCAGTAGAGGGCTG

TCTGGCTCAGGTCTTCTTTGTATTTGCCACTGGAGGGACTGAAGCCTGTCTGCTCTCAGT

GATGGCCTATGACCGTTATGCAGCCATCTGCCACCCTCTGATCTACAGACAGATCATGAG

TAAACAGATGTGTGGGGGTCTGGCATGGGCCTCATGGGGACTGGGCTTTCTGGATGCTCT

CATCAATATCCTCCTGGCTTTGAATTTGGACTTCTGTGAGGCTCGTGTCATGCCTCACTT

CAGCTGTGAGCTGCCTTCTCTATTCCCTCTGTCCTGCTCTGATGTCTCCACCAACTTTGT

AGTCCTGACCTGCTCTGCCATCCTGCATGCCCTTGGAACCCTACTCTTGATATTCTTCTC

TTATGCACGCATTATCTCCACCATCCTGAGCATCAGTTCCACCACAGGCAGAAGCAAGGC

CTTCTCCACCTGCTCATCCCACCTCACTGCAGTGAGCTTCTTCTATGGATCAGCTTCTCT

CCGCTATCTCATGCCAAATTTAAGCTCTTCTTTGGAATTGGTTTTTTCTCTGCAGTACAG

TGTGGTCACTCCCCTAGTGAATCCTCTAGTCTATAGCCTGAAGAACAAGGAAGTAAAGGC

AGCTCTGAAAAGGATGTTGCAAAAGGTTTTACAGCATCTCAGA

>LoafORs2.35

ATGGCCTCGAGGAACCATAGCACCATCACGGAGTTTATTCTCATTGGGCTGTCCGCTGAC

CCTCACACTGAGGCTCTGCTGTTTGTACTCTTCCTGGTGATTTATCTTCTGACCATGATG

GGGAACTTGTTGATGCTGCTGATGATTAGGGTAGATTCCCACCTCCACACACCCATGTAC

TTCTTCTTAAGTAATCTGTCATTCCTGGACCTTTGCTTCTCTTCTGTCACTCTACCCAAG

CTACTGGAGGACCTCCTGTCTGAGAAGAAAACCATCTCAGTAGAGGGCTGCCTGGCTCAA

GTCTTCTTTGTGTTTTTAACTGCAGGAACTGAAGCCTGTCTGCTCTCAGTGATGGCTTAT

GACCGCTATGCTGCCATCTGCCACCCGCTGCTTTATGGCCAGGTGATGAGCAACCAGCGC

TGTGCGAAACTGGTGTTGGCCTCATGGGGCCTGGCTTCTCTCAATGCAGTTGTGATTTTG

CTCTTGGCTATAAATATGGACTTCTGTGAAGCCCAGACTATACACCACTTCACCTGTGAG

CTACCCGCTCTCTTCCCCTTGTCTTGCTCTGATATCTCCACCAATATCAATATCCTACTC

AGCGCCAGCTTACTGCATGGGCTTGGAACCTTCATGCCGATCTTCTTATCCTATGCACGT

ATTATCTCCACCATCTTGAGCATCAGCTCCACCACAGGCAGAAGCAAGGCCTTCTCCACC

TGCTCCTCTCACCTTATTGCGGTGGTCCTGTTCTTTGGTTCAGGTTTTCTTTGCTATCTC

ATGCCTCCATCTGGTTCCTCCATGGATTTGCTTTTATCCTTGCAGTACAGTGTGATCACA

CCCCTGATGAATCCACTTATCTACAGCCTAAAAAACAAGGAGGTGAAGGCAGCTGTGAAA

AAGACATTGGGGAAATTTCTATAA

>LoafORs2.36

ATGACCTTGAGAAACCACAGCACCATCACCGAGTTCATCCTCCTCGGACTGTCTGCTGAC

CCCCACATTGAGGCTCTGCTCTTCATGCTGTTCCTGGCAATCTACCTCCTGACCCTGATG

GGGAACCTGGTGTTGCTGCTGGTGATCATGGCTGATTCTCACCTCCACACACCCATGTAC

TTCTTCTTGGGCAATCTGTCATTCCTGGACCTCTGTTTCTCTTCTGTCACGCTACCCAAG

CTGCTTGAGAACCTCCTGTCTGAAAAGAAAACCATCTCAGTAGAAGGCTGTCTGGCTCAG

GTCTTCTTTGTGTTTATCACTGCAGGAGCTGAAACCTTTCTGCTTTCAATAATGGCCTAT

GACCGCTATGCTGCCATTTGTCGTCCACTGCTCTATGAACAGCTAATGAGCAACCAGTTC

TGTGTGAGGCTGGTGTTGACCTCATGGGGCCTGGCCTTTCTCAACGCAATCCTCATTGTG

CTCTTGGCTATTAACCTGGACTTCTGTGAGGCCCAAACTATACAGCATTACACCTGCGAG

TTGCCCTCTCTCTTCCCCCTGTCTTGCTCTGATACCTCCATCGATATCAATATCCTGATC

TACTCCGTCTTACTACAGGCTCTTGGGACCTTCTTTCTGATCTTCTTCTCATACCTTCGC

ATTATTTCCACCATCCTGAACATCAACTCCACCACAGGCAGAAGCAAGACCTTCTCCACC

TGCTCCTCCCACCTCATTGCAGTGATCCTGTTCTTTGGTTCAGATTTGGTTCGCTATCTC

ATGCCCACCTCTGGTTCCTCCCTTGATTTGCTCACCTCCCTGCAATACAGCGTGGTCACT

CCCATGCTGAATCCCCTCATCTACAGCCTAAAGAATAAGGACATGAGGGCAGCATTGGAA

AGAACACTGGGGAACTATCTGTAA

>LoafORs2.37

ATGGATTTGAGGAACCACAGCACCATCACCGAGTTCATCCTCCTCGGGCTGTCTGCTGAC

CCCCACATTGAGGCTCTGCTCTTTGTACTCTTTCTGGTGATCTACCTCCTGACCCTGATG

GGGAACCTGGTGATGCTGCTGGTGATCATGGCTGATTCTCACCTCCACACACCCATGTAC

TTCTTCTTGGGCAGTCTGTCATTCCTGGACATCTGTTTCTCTTCTGTCACTCTACCCAAG

CTGCTTGAAGGCCTTCTGTCTGAGAAGAAAACCATCTCTGTAGAAGGCTGCCTGGCTCAG

GTCTTCTTTGTGATTATCACTGGAGGGACTGAAGCCTTTCTGCTTTCAATGATGGCCTAT

GACCGCTATGCTGCCATCTGCCACCCACTGCTCTATGGACAGCTGATGAACAACCAGCTC

TGTGTGAGGCTGGTGTTGACCTCATGGGGCCTGGCCCTTCTCAACGCAATCCTCATTGTG

CTCTTGGCTATTAACCTGGACTTCTGTGAGGCCCAAACTATAAAGCACTACGCCTGTGAG

CTACCCTCTCTCTTCCCCCTGTCTTGCTCTGATATCTCCATCAATATCAATATCCTGATC

TGTTCTACTTTACTGCATGCGTTTGGAACCTTCCTCCCAATCTTTATCTCCTATGCCCGT

ATTATCTCCACCATCCTGAGCATCAGCTCCACCACAGGCAGAAACAAGGCCTTCTCCACC

TGTTCCTCACACCTCATTGCAGTGATCCTGTTCTTTGGTTCAGGTTTGGTTCGCTATCTC

ATGCCCACCTCTGGTTCCTCCCTTGATTTGCTTACCTCCGTGCAGTACAGTGTGGTCACT

CCCATGCTGAATCCCCTCATCTACAGCCTAAAGAACAAGGAGGTGAAGACAGCTTTGAAA

AGAACATTGGGGAAATATTATATTTTAGCTAATGAACAAAGATAG

>LoafORs2.38

ATGGCCTTGAGGAACCACACCACCATCACTGAGTTTTTTCTCACTGGGCTGTCTACTGAT

CCCCACATCGAGGCTCTGCTATTCGCGCTTTTCCTGGTGATTTACCTTCTGACCATGATG

GGGAACCTGATGATGTTGCTGGTGATCAGGGCAGATTCCCACCTCCACACACCCATGTAC

TTCTTCCTGAGTAATCTGTCATTCCTGGACATCTGTTTCTCTTCTGTTACTGTGCCCAAG

CTGCTGGAGGACCTCCTGTCTGAGAAGAAAACCATCTCAGTAGAGGGTTGCATGGCTCAG

GTCTTCTTTGTGTTTATCACTGCAGGTACTGAAGCCTTCCTGCTCTCGATGATGGCCTAT

GACCGCTATGCAGCCATCTGCCACCCACTGCTCTATGGCCAGGTGATGAGCAACCAGCTC

TGTGTGAGGCTGGTGTTGACCTCATGGGGCCTGGCCTCTCTCAACTCAGTTGTCATTGTG

CTCTTGGCTATTAACCTGGACTTCTGTGAAGCCCAAACTATACACCACTACATCTGTGAG

CTGCCTTCTCTCTTCCCCCTGTCTTGCTCTGATACCTCCATCAATATCAATATCCTGATC

TGCTCTATTTTCCTGCATGGGTTTGGAACCTTCCTTCCAATCTTCATCTCCTATGCCCAT

ATTATCTCCACCGTCCTGAGCATCAGCTCCACCACAGGCAGAAACAAGGCCTTCTCCACC

TGTTCCTCCCACCTCATTGCAGTGATCCTGTTCTTTGGTTCAGGTTTGGTTCGCTATCTC

ATGCCCACCTCTGGTTCCTCCCTTGATTTGCTTGCCTCCTTACAGTACAGTGTGGTCACT

CCCATGTTGAATCCACTAATCTACAGCCTAAAGAACAAGGACGTGAAGGCAGCTTTGAAA

AGAATGTTAGAGAAATATGTGTAA

>LoafORs2.39P

ATGGAAGTTAGCAACGTAACCACAGTCACCGCGTTTGTTCTCCTGGGGCTATCCAACAAC

CCTCAGATTCAGGTATTACTCTTTGGGCTATTCCTGGTGATTTACCTCTTGACCCTCACA

GGGAACTTGATGATGTTGCTGGTGATCAGTACCGATTCCCACCTCCACACTCCTATGTAC

TTCTTCCTGAGTCACCTCTCTTTTCTGGATGCTTTCAGTTCCTCAATCATTGTGCCCAAA

CTTCTGGAGAACCTTCTTTCTAGGTGGAAGATTATATCCCTCCTTGAGTGTTTCACCCAG

ATCTCTTTGGTCATATTTTCTGGAGCCACTGAAGCTTGTCTCCTTTCAGTCATGGCCTAT

GACCGATTCCAGGCTGTGTGCCACCCTCTGTTGTATGTAGTGGCTATGAACAGAAGGGTA

TGTACTGGCCTGGTGGGGGCATGCTGGACCGTAGGAATGGGGACCAGCCTGATCAACACA

CTCCTCTTGGCTCAGCAGTACTTCTGTGGCCCCAACCTTGTCCGCGGTTTTGCCTGCGAG

CTTCCCTCAGTGCTCCTGTTGACCTGTTCTGACCCTCACGCTAGCATTGCCTGTATCTTG

ACCACCATGGTGGTCCTGGGCCTGGGTACCCTTGTCCTATTGCTGGGTTCCTACACCCAT

ATCATCATGACAGCTCTGGGAATCAACTCTGCCAAGGGTCGGAGCAAGATCTTCACTACC

TGCTCTTCTCATTTCCTTGTGATCACCATCTTTTATGGTTCAGGACTTTTCAGG

>LoafORs2.40

ATGAAGAAGCAGTCCAGTGGTGATGGTGAGAACCAGATAATCTGGCTGATCCTAGTGGGC

TTCGGGGAACTGCAACACCTGGGCTTCCTCCCCTTCACTCTCTTTCTGGCCATCTATGTG

GTGATAGTTGGGGGCAACGCCCTCATCATGCCGGCTGTGGCCTCTAGTCAGACTCTCCAC

ACACCCATGTACTTCTTCCTCTGTCACTTCTCCCTGCTAGAGATTGGCTACACCTCCAAC

ATTGTGCCTCGGCTACTGCACAGCTTCCTGGAAGGCAAAGAAGCCATCTCGCTGGTCAGC

TGTCTGGTCCAGTTCTACATGTTTGCCTCACTGGCTGCAGCTGAGTGCCTCCTGCTCTCC

ACCACGTCCTATGACCGTTACTTGGCCATCTGCCACCCCCTTCACTACCCTGTTCTGATG

AACACCTGGCTGTGTGGCTGCCTGGCAACTGGTGCCTGGCTCTGTGGTTTCTCCTTCTCT

GCATTCACTCTGGCCCTAGCAGCCCCTCTGCCCCTCTGCCCTGGCATCAGAGAGATCGAC

CACTACTTCTGTGACTTTGCTCCAGTTGTAGGGCTGTTCTGTGGGAATGGGCAAGTCATG

TGGGGAGCTGGGGTCTGCATCTCAGGCTTCCTGACACTGGCTCCTTTCCTGTTGATTGTG

GCATCCTACACCCTCATCCTGAGGGCTGTGCTGCAAATTCTGTCAGGCTATGGGAGGCAG

AAAGCCTTCTCCACTTGTTCTTCCCACCTCAGAGTGGTTGGAGTGTTTTATGGTACCCTC

ATTGTGGTCTATGTGGCCCCTACAGATCACATGGCTCCCTTGATCCAAAAGGCTGTCTCT

GTCCTCTACACTGTGCTCACCCCTATGGTCAACCCCATCTTCTACAGCCTCAAGAGCGAA

GAGGTAAAATGGGCCCTTCATAGGCTCTGGAGACAGCTCATGTCAGGCTGTACCCCACTG

AGGCAGACAGGACAGCTATTGACTTCTTTCTGA

>LoafORs2.41

ATGGGTGACAAGGGAACAAGCAACTACTCAGATGTAACTGACTTCATTCTTGTAGGCTTC

AGGGTCCGTCCAGAGTTCCACATTCTCCTGTTCCTACTATTCCTGCTGGTCTATGGCATG

GTCCTTTTGGGAAACATTAGTATGATGGCAATCACTGTGATTGACTCCCAGCTGAATACA

CCAATGTATTTCTTTCTAGGCAATCTTTCCTTCATTGACCTCTCCTACTCTACTGTTATT

GCACCGAAAGCCATGATCAACTTCCTGTCTGAGAAAAAGACTGTCTCCTTTGCAGGTTGT

GCTGCCCAGTTTTTCCTCTTTGCTCTCTTCATTGTGACAGAGGGCTTTGTCCTGGCAGCC

ATGGCCTATGATCGCTTCATTGCCATCTGCAATCCTCTTCTTTACAGTGTGCACATGTCA

AGACGCCTCTGCACACAGCTGGTGGCTGGTTCCTATTTCTGTGGCTGGGTCAGTTCTCTA

CTCCAAGTCAGTGTCACATTCTCAGTGACGTTCTGTGCTTCTCGAGTCATTGATCACTTC

TACTGTGATTCTTACCAAATTGAGAAGATTTCCTGCTCTAATCTCTTTGTCAATAAGATG

GTATCTCTCAGTTTGGCTGCCTTCATTATTTTGCCCACAATAGTTATTATTGTAGTATCT

TACATTTATATTGTGTCTACAGTCTTGAAGATCCCCTCCAGTGAAGGCAGGAAGAAAGGC

TTTTCCACCTGTAGCTCCCACTTGGGGGTTGTGAGTGTACTCTATGGGACAGTCTCCTTT

GTGTATCTCACACCTCCAAGCAATCCTGAACTTCGAAAAGTGGCTTCAGTATTTTACATA

TTGGTCACACCCATGTTAAACCCTCTGATTTATTCTCTAAGAAATAAGGACGTCAAACAA

GCTTTGAGGAAAATCCTATGGAAGAAAAAAGCTTTATCTTAA

>LoafORs2.42P

ATGGGTGACAAGGGAGGAGACAACCACAAGGAAATGACTGACCTCATTGTTGTAGGCATC

AGGTTTCATCCAGAGCTCCACAGTCTCCTCTTCCTACAGTTCCTGATTGTTTATGGCATG

GTCCTTCCAGGGAGCCTTAGCATGATTGGCATCGTTATGGCAGATCCCCACCTGAACACA

CCACTGTACTTCTTTCTTGGCAACCTCTCTGTTATTGACCTCTCCTACTCTACTGTTTTA

TACCCAAAGCCATGGTCAATATCCTTTCACAGAAAAAGACCATATATTTTGCAGATTGTG

TGGCTCAGCTCTTCTTTTATGCTTTCTGTCCTGCCAGCCATGGCCTATGACTGCTTCATG

GCTGTCAAGAAGCCTCTGTATTCAGTT/CTGTCAAGAAGCCTCTGTATTCAGTTGGTGGC

TGGTTCCTATCTCTGTGGCTGGGTCAGTTTTATTCTTCACATAAGTGTAACATTCTCCAT

GTCTTCCTGTGCCTCTTGAGTCATTGATCCCTTCTAGTATGATTCTAATCCAGTTGAGAA

GATACACTTTTCCAATATCCTTGTCAATAAGATGTTGTCACTTAGTTTGGCTGTAATCAT

TACTATGCCCACAATAGTTGCTATTGTAGTATATTACATGCATATTGTATTCATAGTCTT

AAAGATCCACTCCAGTGAAGGGAAGAAGAAAGCCTTCTCTACTTGCAGCTCCCAGCTAGG

GCTTGTGAGTTTGCTCTATGGGACTGCCTCGTTTGTGTATCTTGTTGTTATTGCTGTTAT

TCTCAAAATAGTCACTATGTTTGAGCCCATCGTTGAGGCACTGCGTCAATTCACCTCGCT

GAGAGTTATCTTACACTCCCAAAGAAACCTGAAC

>LoafORs2.43

ATGGGGGACAGGGAAACAAACAATCATTCAGAAGTGACTGACTTCATTCTTGTTGGCTTC

AGAGTCAGCCCAGAGCTGCATATTCTCCTCTTCCTGCTATTTCTGCTTGTGTATGCCATG

ATACTTCTAGGGAACCTTGGGATGATGACCATTATCATGATTGATCCTCGGCTGAACACA

CCAATGTATTTCTTCCTAGGCAACCTCTCCTTCATTGATCTCTTCTATTCCTCTGTGATT

GCACCCAAGGCTATGATCAACTTCTGGTCTGAGAGCAAATCTATCTCCTTTGCAGGCTGT

GTGACTCAGCTTTTTCTCTTTGCCCTCTTCATTGTGACTGAGGGATTTCTTCTGGCAGCC

ATGGCTTATGATCGCTTCATTGCCATCTGCAATCCACTCCTCTACTCTGTCCAAATGTCA

ACACTTCTCTGCACTCAGTTAGTGGCTGGTTCCTATTTCTGTGGCTGCATCAGTTCAGTT

CTTCTGACCAGCATAACATTCACCTTACCCTTTTGTGCTTCTCGAGCCATTGACCATTTC

TACTGTGATAGTCGCCCACTTCAGAGGATTTCATGTTCAGATCTCTATTTCTATAAAATG

GTGTTTTTTTCTTTATCCAGTAGCATCATTTTGCCTACCATCATAGTCATTATTATTTCT

TACATGTATATTGTGTCTACAGTTCTCAAGATACGCTCCACTGAGGGACGTAAGAAAGCC

TTCTCCACTTGTAGCTCCCACCTGGGAGTCGTAAGTGTGCTGTATGGTGCTGTCTTTTTT

ATGTATCTGACTCCTGACAGATTTCCTGAACTGAGTAAAGTGGCCTCCTTATGTTATACC

CTAGTCACCCCCATGTTGAATCCTTTGATTTATTCTTTGAGAAACAAAGATGTCAAAGAA

GCTCTGAGAAAGATCCTGAAGAAAAAAAGTTTTATTTAA

>LoafORs2.44P

AATCATTCAGAAGTGACTGACTTCATTCTTGTTGGCTTCAGGGTCGGCCCAGAGCTGCAT

ATTCTCCTCTTCCTCCTATTTTTGGTTGTATATGCCATGATCTTTCTAGGCAACATTGGG

ATGATGGCTATTATCATGACTGATCCCCGGCTGAACACACCAATGTATTTCTTCCTAGGC

AACCTCTCCTTCATTGATCTCTTCTATTCCTCTGTGATTGCGCCCAAGGCTATGATCAAC

TTCTGGTCTGAGAGCAAGTCCATCTCCTTTTCAGGCTGTGTGACTCAGTTCTTTCTCTTT

GCCCTCTTCTTTGTGACTGAGGCATTTCTCCTGGCAGCCATGGCTTATGACCGCTTCATT

GCCATCTGCAATCCACTCCTCTACTCTGTTCAGATGTCAACAAGACTCTGAATTCAGTTG

GTGGCTGGTTCCTATTTCTGTGGCTGCATCAGTTCAGTTCTTCAGACCAGCATAACATTC

ACCTTATCCTTTTGCGTTTCTCGGGTCATTGACCACTTCTACTGTGATACTTGCCCACTT

CAGAGGATTTCATGTTCTGATCTCTTTATCTACAAAGTGGCGTCTTTTTCTTTAACTGGC

ATCATCATCTTGCCTAGCATCATAGTCATTGTTGTTTCTTACATGTATATTGTGTCTACA

GTTCTCAAGGTACGCTCCACTGAGGGACGTAAGAAAGCCTTCTCCACTTGTAGCTCCCAC

CTGGGAGTCGTGAGTGTGTTGTATGGTGCTGTCTTTTCTATGTATCTGACTCCTGACAGA

TTTCCTGAACTGAGTAAAGTGGCCTCCGTATGTTACACCCTAGTCACCCCCATGTTGAAT

CCTTTGATTTATTCTCTGAGAAACAAAGATCTCTAAGAAGTTCTAAAAAAAATGATAGAG

AAGAAAAATACCATTCTT

>LoafORs2.45

ATGGGTTACAGGGAAACAAGAAATCATTCAGAAGTGACTGATTTCATTCTTGTTGGCTTC

AGAGTCGGCGCAGAGCTGCATATTCTCCTCTTCCTCCTGTTTCTGTTTGTATATGCTGTA

ATTCTTCTAGGGAATGTTGGGATGATGGCCATTATCGTGACTGATCCCCGGCTGAACACA

CCAATGTATTTCTTCCTAGGCAACCTCTCCTTCATTGATCTCTTCTATTCCTCTGTGATT

GCGCCCAAGGCTATGATCAACTTCTGGTCTGAGAGCAAGTCCATCTCCTTTGCAGGGTGT

GTGACTCAGTTCTTTCTCTTTGCCCTCTTCATTGTGACTGAGGGATTTCTTCTGGCAGCC

ATGGCTTATGATCGCTTCATTGCCATCTGCAATCCACTCCTCTACTCTGTTCAGATGTCA

ACAGGTCTGTGTACTCAGTTGGTGGCTGGTTCCTATTTCTGTGGCTGCATCAATTCAGTT

CTTCAGACCAGCTTGACTTTCACCTTATCCTTTTGTGCTTCTCGGGCCGTTGACCATTTC

TACTGTGATATTCGCCCACTTCATAGAATTTCATGTTCTGATCTCTTTATCTATAAAGTG

GTGGCTTTTTCTTTATCTACCATCATTGTCTTGCCTACCATCATAGTCATTATTGTTTCT

TACATGTATATTGTGTCTACAGTTCTCAAGATACGCTCCACTGAGGGACGTAAGAAAGCC

TTCTCCACTTGTAGCTCCCACCTGGGAGTTGTGAGTGTGCTATATGGTGCTGTCTTTTTT

ATGTATCTGACTCCTGACAGATTTCCTGAGCTGAGTAAAGTGGCCTCCGTATGTTACACC

CTAGTCACCCCCATGTTGAATCCTTTGATTTATTCTCTGAGAAACAAAGATGTCAAAGAG

GCTGTAAAAAATATTCTAGAGAAGAAAAATACCATCCTTTGA

>LoafORs2.46

ATGGGTGACAGGGAAACAAATCATTCAGAAGTAACTGATTTCATTCTTGTTGGCTTCAGA

GTCAGCGCAGAGCTGCATATTCTCCTCTTCCTCCTATTTCTGCTTGTATATGCCATGATA

CTTCTAGGGAACCTTGGGATGATGACCATTATCATGACTGATCCCCGGCTGAACACACCA

ATGTATTTCTTCCTAGGCAACCTCTCCTTCATTGATCTCTTCTATTCCTCTGTGATTGCG

CCCAAGGCTATGATCAACTTCTGGTCTGAGAGCAAGTCCATCTCCTTTACAGGGTGTGTG

ACTCAGTTCTTTCTCTTTGCCCTCTTCATTGTGACTGAGGGATTTCTCCTGGCAGCCATG

GCTTATGACCGCTTCATTGCCATCTGCAATCCACTCCTCTACTCTGTTCAGATGTCAACA

GGTCTGTGTACTCAGTTGGTGGCTGGTTCCTATTTCTGTGGCTGCATCAGTTCAGTTCTT

CAGACCAGCATGACATTCACCTTATCCTTTTGTGCTTCTCGGGCTGTTGACCATTTCTAC

TGTGATATTCGCCCACTTCATAGAATTTCATGTTCTGATCTTTTTATCTATAAAGTGGTG

GCTTTTTCTTTATCTGCCATCATCATCTTGCCTACTGTCATAGTTATTATAGTTTCTTAC

ATGTATATTTTGTCTACAGTTCTTAAGATACGCTCCACTGAGGGACGTAAGAAAGCTTTC

TCCACTTGTAGCTCCCACCTGGGAGTCGTGAGTGTGCTGTATGGTGCTGTCTTTTTTATG

TATCTGACTCCTGACAGACTTCCTGAACTGAGTAAAGTGGCCTCCTTATGTTACACCCTA

GTCACCCCCATGTTGAATCCTTTGATTTACTCTCTGAGAAACAAAGATGTCAAAGAAGCT

GTAAAAAATATTCTAGAGACAAAAAGTACCATCCTTTGA

>LoafORs2.47

ATGGGTGACAGGGAAACAAGAAATCATTCAGAAGTGACTGACTTCATTCTTGTTGGCTTC

AGGGTCAGCCCAGAGCTGCATATTCTCCTCTTCCTGCTATTTCTGCTTGTGTATGCCATG

ATACTTCTAGGGAACCTTGGGATGATGACCATTATCATGACTGATCCCCGGCTGAACACA

CCAATGTATTTCTTCCTAGGCAACCTCTCCTTCATTGATCTCTTCTATTCCTCTGTGATT

GCGCCCAAGGCTATGATCAACTTCTGGTCTGAGAGCAAGTCCATCTCCTTTGCAGGGTGT

GTGACTCAGTTCTTTCTCTTTGCCCTCTTCATTGTGACTGAGGGATTTCTCCTGGCAGCC

ATGGCTTATGACCGCTTCATTGCCATCTGCAATCCGCTCCTCTACTCTGTTCAGATGTCA

ACAGGTCTGTGTACTCAGTTGGTGGCTGGTTCCTATTTCTGTGGCTGCATCAGTTCAGTT

CTTCAGACCAGCATGACATTCACCTTATCCTTTTGTGCTTCTCGGGCTGTTGACCATTTC

TACTGTGATATTCGCCCACTTCAGAGGATTTCATGTTCTGACCTCTTTATCTATAAAGTG

GTGTCTTTTTCTACAGGTACCATCATCATCTTGCCTACCATCATAGTCATTATTGTTTCT

TACATGTATATTGTGTCTACAGTTCTCAAGGTACGCTCCACGGAGGGACGTAAGAAAGCC

TTCTCCACTTGTAGCTCCCACCTGGGAGTCGTGAGTGTGCTATATGGTGCTGTCTTTTTT

ATGTATCTGACTCCTGACAGATTTCCTGAGCTGAGTAAAGTGGCCTCCTTATGTTACACC

CTAGTCACCCCCATGTTGAATCCTTTGATTTACTCTCTGAGAAACAAAGATGTCCAAGAG

GCTGTAAAAATTTTTCTAGAGAAGAAAAATACCATGCTTTGA

>LoafORs2.48

ATGGGGGACAAGGAAACAAGAAATCACTCAGAAGTGACTGACTTCATTCTTGTAGGCTTC

AGGGTTGGCCCAGAGTTGCATATTCTCCTCTTCCTGCTATTTCTGGTTGTATATGCCATG

ATCCTTCTAGGCAACGTTGGGATGATGACCATTATTGTAACCGATTCCCGGCTGAACACA

CCAATGTATTTCTTCCTAGGCAACCTCTCCTTCATTGATCTCTTCTATTCATCTGTGATT

GCACCCAAGGCTATGATCAACTTCTGGTCTGAGAGCAAGTCCATCTCCTTTGCAGGCTGT

GTGACTCAGCTCTTTCTCTATGCCCTCTTTATTGCAACTGAGGGATTTCTCCTGGCAGCC

ATGGCTTATGACCGCTTCATTGCCATCTGCAATCCACTCCTCTACTCTGTTCAGATGTCA

ACGCTTCTCTGCACTCAGTTAGTGGCTGGTTGCTATTTCTGTGGCTGCATCAGTTCAGTT

CTTCAGACCAGCATAACCTTCACCTTATCCTTTTGTGCTTCTCGAGCCATTGACCATTTC

TACTGTGATAGTCGCCCACTTCAGAGGATTTCATGTTCTGACCTTTTTATCTATAAAGTG

GTAACTTTTTCTTTATCCAGCATTATCATCTTGCCTACCATCGTAGTCATTATTGTTTCT

TACATGTATATTGTGTCTACAGTTCTCAAGATACACTCCACCGAGGGACGTAAGAAAGCC

TTCTCCACTTGCAGCTCCCACCTTGGAGTCGTGAGTGTGCTGTATGGTGCTGTCTTTTTT

ATGTATCTGACTCCTGATAGATTTCCTGAACTGAGTAAAGTGGCCTCCTTATGTTACACC

CTAGTCACCCCCATGTTGAATCCTTTGATTTACTCTCTGAGAAACAAAGATGTCAAAGAG

GCTGTAAAAACTGTTTTAGAGAAGAAAAATACCATCCTTTGA

>LoafORs2.49

ATGGGTGACAGGGAAACAACGAATCATTCAGAAGTGACTGACTTCATTCTTGTTGGCTTC

AGGGTCCGCCCAGAGCTGCATATTCTCTTCTTCCTCCTATTTCTGCTTGTATATGCCGTG

ATCCTTCTAGGGAATGTTGGGATGATGGCCGTTATCATGACTGATCCCCGGCTGAACACA

CCAATGTATTTCTTCCTAGGCAACCTCTCCTTCATTGATCTCTTCTATTCATCTGTGATT

GCGCCCAAGGCTATGATCAACTTCTGGTCTGAGAGCAAGTCCATCTCCTTTGCAGGGTGT

GTGACTCAGCTTTTTCTCTTTGCCCTCTTCATTGTGACTGAGGCATTTCTCCTGGCAGCC

ATGGCTTATGACCGCTTCATTGCCATCTGCGATCCACTCCTCTACTCTGTCCAGATGTCA

ACACTTCTCTGCATTCAGTTGGTGGCTGGTTCCTATTTCTGTGGCTGCATCAGTTCAGTT

CTTCTGACCAGCATAACATTCACCTTATCCTTTTGTGCTTCTCGAGCCATTGACCATTTC

TACTGTGATAGTCGCCCACTTCAGAGGATTTCATGTTCTGACCTCTATTTCTATAAAATA

GTGTTTTTTTCTTTATCCAGCAGCATCATTTTGCCTACCATCATAGTCATCATTGTTTCA

TACATGTTTATTGTGTCTACAGTTCTCAAGATACACTCCACCGAGGGACGTAAGAAAGCC

TTCTCCACTTGCAGCTCCCACCTTGGAGTCGTGAGTGTGCTGTATGGTGCTGCCTTTTTT

ATGTATCTGACTCCTGACAGGTTTCCTGAGCTGAGTAAAGTGGCCTCCTTATGTTACACC

CTAGTCACCCCCATGTTGAATCCTTTGATTTATTCTCTGAGAAACAACGATGTCAAAGAA

GCTCTGAGAAAGATCCTGAAGAAAAAAAAAAGTTTTTTATTTAATTATTTTTTAACAGAG

TCTTAG

>LoafORs2.50P

ACTTTTAACCACTGGGAGATGACTGACCTCATTCTTGTAGGCATCAGGTTTCGTTCAGAG

CTCCACAGTCTCCTCTTCCTACTATTCCTGATTGTTTATGGTATGATCTTTCTGGGAAAC

CTTAGCATGATTGGCATCATTGTGGCTGATCCCTACGTGAACACACCAATGTATTTCTCC

CTTGGCAACGTCTCTGTTATTGATCTCTCCTACTCCACTGTTAGTGTACCCAAAGCCATG

GTCAATACCCTTGTGCAGCTCAGCTCTTTTTTCATGCTCTCTGTCCTGGCATCTGTGGCC

TATGACTGCTTCATTGCCATCTGTGACCCACTCCTGTATACTGTCCATATGTCAAGAAGT

CTCTGTATTCAGTTGGTGACTGGTTCCTATCTCTGTGACTGGGTTAGTTCCATTATACGA

ATCAGTATAACATTCTCCTCGTCTTTCTGTGCTTCTGGAGTCATCGATCACTTCTACTGT

AATTCTAATCCAGTTGAGAAGATAAACTGTTCCAATATCTTTGTCAATAAGATGGTGTCA

CTTAGTTTGGCTACAATCATTATTATGCCCACAATGGTTGTTACTGTAGTATCTTACATG

CATATTGTGTTCATAATCGTAAAGATCCTCTCCAGTGAAGGGAGGAAGAAAGTCTTCTCT

ACTGGTAGCTCCAACCTGGGAGTTGTGAGTTTGCTCTGTGGTACTGTCTCCTTTGCGTAC

ATT

>LoafORs2.51

ATGAAGAGTGAGCTGAACAGGAATTACTCAGAGGTGACTGAGTTTATTCTACTGGGCTTC

AGAACCTCTCCAGAGCTACAGGTCCTCTTATTCCTAGTGTTCTTGCTAATCTACATCGTC

ACTGTGGTGGGAAATATCAGCATGATAATTGTCACTAACGTGGACTCCAGACTTCACACC

CCTATGTACTTCTTCCTCAGAAACTTGTCCTGTTTAGACCTCTGCTACTCCACTGTCATT

GCTCCTAAAACTCTAGCCAACTTCTTGTCTAATGAAAAGAAAATTTCTTACAATGGCTGT

GTAGCCCAATTTTTCTTCTTTGCCCTCTTTGTCACAACAGAAGCCTTCCTTCTGGCTGTG

ATGGCATTTGATCGATTCTCAGCCATTTGCTCTCCCCTTCTTTACCCTGTGCACATCTCC

CAGAAAGTCTGTGTTTGCTTAGTAACTGGCTCCTATCTCTGTGGAGCCATTAACTCCGTA

GTACACACAGGTTTCACCTTCAGTTTGCGTTTCTGTGAAGAAAACAGATTGGACCACTTT

TTCTGTGATGTCCCAGCCCTGATTGAGATCTCATGTGTTGACACCTTTGTGAATGAGATT

GTGCTGTTTGTTCTCTCTGCTTTTATTGTCATCACTACGACAATGGCTATTCTGATATCT

TATGCTTATATCCTCTCTACTGTCTTGAAGATCCCCTCGACTCAGGGCAGGAGTAAGACC

TTCTCCACCTGTGGTTCCCATATAGCAGCGGTAAGCTTATTCTATGGGACTGTGTTCTTC

ATGTATGCTCAACCTGGGGCCATTGCCTCACCCCAGCAAAACAAGATTGTTGCTGTGTTC

TACACACTTATAATACCAATGCTCAACCCTCTAATATACAGTCTGAGAAACAGAGATGTG

AAAGATGCTGTGAAAAGAATATTATGTGGGAAATGA

>LoafORs2.52

ATGAAGAGCGAGATGAGTAGGAATTACTCAGAGTTGACAGAGTTTATTCTACTGGGATTC

AGAACCGCTCCTGGGCTACAGATCCTCTTATTCCTAGTGATTTTGCTAATCTACATAGTC

ATTGTGGTGGGAAATATCAGCATGATAATTGTCATTAAGGTGGACTCCAGACTTCACATG

CCTATGTATTTCTTCCTCAGAAACTTGTCCTATTTAGACCTCTGCTACCCCACTGTCATT

GCTCCCAAAATTCTAGCGAACTTCTTGTCTAACGAAAAGAAAATTTCTTACAGTGGCTGT

ATAGCCCAATTTTTCTTCTTTGCCCTCTTTGTCACAACTGAATGCTTTCTTCTGGCTGTG

ATGGCATTTGATCGAATCTCAGCCAATTGCTCTCCCCTCCTTTACCCTATGCACATGTCC

CAGAAGGTCTGTGTTCGGTTGGTAACTGGTTCGTATATCTGTGGAGTCATTAACTCCGTA

GTACACACAGGTTTCACCTTCAGTTTGCGTTTCTGTGAAGAAAACAGATTGGACCACTTT

TTCTGTGATGTCCCAGCCCTGATTGAGATCTCATGTGTTGACACCTTTGTGAATGAGATT

GTGCTGTTTGTTCTCTCTGCTTTTATTGTCATCACTACGACAATGGCTATTCTGATATCT

TATGCTTATATCCTCTCCACTGTCTTGAAGATCCCCTCGACTCAGGGCAGGAGTAAGACC

TTCTCCACCTGTGGTTCCCATATAGCAGCGGTAAGCTTATTCTATGGGACTGTGTTCTTC

ATGTATGCTCAACCTGGGGCCATTGCCTCACCCCAGCAAAACAAGATTATTGCTGTGTTC

TACACACTTGTAATACCAATGCTCAACCCTCTAATATACAGTCTGAGAAACAGAGATGTG

AAAGATGCTGTGAAAAGAATATTATGTGGGAAATGA

>LoafORs2.53

ATGAAGAGTCAGCTGAATAGGAATTATTCAGCGTTGACAGAGTTTTTTCTTTTGGGATTC

AGAACATCTCCGAAAATACAGATTCTCTTATTCTTAGTGTTCTTGCTTGCCTACATGGTC

ACTGTGGTGGGAAATATCAGCATGATAGTTGTCGTTAAGGTGGATTCCAGGCTTCACACC

CCTATGTATTTCTTTCTCAGAAACTTGTCCTATTTAGACCTTTGCTATTCCACAGTCATT

GCTCCCAACACTCTGGCCAATTTCTTGTCCAAGGATAAGAAAATTTCTTACAATGGCTGT

GCAACGCAGTTCTTTTTCTTTGCTCTCTTTGTTGGGACTGAGGGCTTTCTTCTGGCTGCG

ATGGCGTACGATCGCTTCTCAGCCATTTGTTCGCCCTTCCTCTACACTGTACGTATGTCT

CAGCAGGCTTGTGTTCGTTTGGTGGTTGGCTCCTATGTCTGTGGATGCATTAATTCCATG

ATTCAAACAGGTTTCACCTTCAGTTTGCGTTTCTGTGGTGAAAACAGACTGGATCACTTT

TTCTGTGATGTCCCAGCGCTGATCAAGATCTCATGTGTTGACACCTTTGTGAATAAGATT

GTACTGTTTATTCTCTCTGCTCTTATTATCATTGCTACCACAATGGTCATTCTAGTTTCC

TATGCTTACATCCTCTCCACTGTCCTGAGGATTCCCTCAACCCATGACAGAAGTAAGACG

TTCTCCACTTGTACCTCTCACATCAGTGTGGTGAGTTTATTCTATGGGACTGTGTTCTTC

ATGTATGCCCAACCTGGGGCCATCTCCTCACCAGAGAAAAGCAAAATTATAGCTGTGTTC

TACACGCTTATCATCCCCATGCTAAATCCTCTGATTTATAGCCTAAGGAACAGAGAGGTG

AAAAATGCTGTGAAAAGGATATTGTTGAGAAAAATATCTTTTCATTGA

>LoafORs2.54

ATGTCTGGCTCTGAGCCTGTGGTGGGTAGAAACCAGTCCCTCTGCACCAAATTCACATTT

GTGGCTTTTTCCTCTCTGGCAGAGTTACAGTCTTTGCTCTTCGTAGTGTTCTTAGTTATC

TACTTGCTTACAGTGGGAGGAAACCTCATCGTCATTTGCCTGGTCTGGATCACTCCTTCC

CTGCACACTCCCATGTATTTCTTCCTGGTGAATCTCTCCTTTCTGGAGATGTGTTACATC

AGCAGTGTGGTGCCTCAGATGTTGATGCACCTGCTAGTAGAGACAAAGACCATTAGTGTT

GGAGGCTGTGCAGCTCAGATGTGTATATTCACCATCTTGGGACTGACAGAGTGCTGCCTG

CTAGCAGCCATGGCTTATGACCGATTTGTAGCTATTTGTTACCCGCTGCATTATTCTATC

TTGATGGGCCCTCGTGTGTGTTTGAAACTGGCTGCAGCATCTTGGACCACTGGAGTGGTG

GTGGAGTCAGTCCAGACCACTTGGATCTTCACTCTGCCCTTCTGTGGAACAGGAAAGATT

CAGCACTTTTTTTGTGACATCATGCCTGTGGTGAAGCTGGCTTGTGTTGACACTTCCCAC

AACGAGATTGTGATGTTCGCTGTCTCTGTGTTCTTCATCATGAGTCCCTGTCTCCTCATT

CTGTGCTCCTACGTGCGCATTCTCACAGCCATCTTGAGAATTCCCTCAGCAGCTGGCAGA

CGCAAAGCATTCTCCACCTGTTCTTCTCATGTCCTGGTTGTTTCTTTGTTCTATGGAACT

GCCTTATTCACTTATCTCCAACCCAAGACTGCCCACACTCCAGAAACAGACAAAGTAACT

GCTCTCATGTACACAGTGGTCACTCCTGCTCTGAATCCTGTCATCTACACCTTGAGGAAC

AAGGAAGTGAAGGAAGCCTTTCAAAGGGTAACACAAAGGAACTCTCTTTCACAAATGGCC

TAA

>LoafORs2.55

ATGATGAGAAACCAAACGTCAGTGATAGAGTTCATTCTTCTTGGATTGACAGATGACACC

GAGCTTCAGGCTGTGCTTTTCCTTTTTCTGCTTCTAACTTATGTCTTAAGTATTATGGGA

AATTTGACCATCATCATTCTGACCCTGCTGGATTATCGCCTCCAGAGTCCTATGTATTTC

TTCCTCCGGAATTTTTCCTTTCTGGAAATTTCTTTTACCTCTGTCTTTGTTCCCAAAATG

CTAGTCAATATCGTAACTGGAGACAAGACTATTTCCTTTGCTGGTTGCTTCACTCAGTAT

TTTTTTGCCATCCTTCTCGGAGCCACTGAATTTTACCTTTTAGCCACCATGTCCTATGAT

CGCTATGTTGCCATCTGTAGACCCCTGCATTACATGACCATGATGAGTAGGAGACTGTGC

ATTCAACTTGTCCTATGTTCCTGGTTCTCTGGTTTGTTAGTTGTCCTTGTGCCACATATA

ATGACTCTCCAGCTGCCCTTCTGTGGGTCCAACATCATCAATCATTATTGCTGTGACTAC

ACTGTACTGTTACATTTGTCCTGTTCAGACACATATTTCATAGGAATGATTGAGTTTTTC

CTTACTGGGGCTACACTCATCTTTACCTTAGTTTTAGTGATTCTTTCCTACACATACATT

ATCAGGACAATTCTGAGAATCCCCTCTGTTCATCAAAGGAAAAAAGCTTTTTCTACTTTT

TCCTCTCACATGATTGTGGTCTCACTATCTTATGGAAGCTGTATCTTTATGTATATAAAC

CCTTCTGTTGAGGATGCAGCCACTTTTAATAAGGGAGTGGCTGTGCTAAATACCTCAGTT

GCCCCTCTGTTGAACCCATTCATCTATACCCTAAGGAACCAGCAAGTGAAAATAGCCTTC

AAAGATATGGTCAGCAAGATACAATTTTTTTTCAAGAAAGTGAAACTATTTGAGGTACAT

CATTAA

>LoafORs2.56

ATGAGAAACCAAACGTCAGTGATAGAGTTCATTCTTCTTGGATTGACAGATGACACCGAG

CTTCAGGCTGTGCTTTTCCTTTTTCTGCTACTAACTTATGTCTTAAGTATTATGGGAAAT

TTGACCATCATCATTCTGACCCTGCTGGATTATCGCCTCCAGAGTCCTATGTATTTCTTC

CTCCGGAAGTTTTCCTTTCTAGAAATTTCCTTTACCTCTGTCTTTGTTCCCAAAACTCTA

GTCAATATCATAACTGGAGACAAGACTATTTCCTTTGCTGGTTGCTTCACTCAGTATTTT

TTTGCCATCTTTCTCGGAGCCACCGAATTTTACCTTTTAGCCGCCATGTCCTATGATCGC

TATGTTGCCATCTGTAGACCCCTGCATTACGTAACCATGATGAGTAGGAGACTGTGCATT

CAACTTGTCCTATGTTCCTGGTTCTCTGGTTTGTTAGTTGTCCTTGTGCCACATATAATG

ACTCTCCAGCTGCCCTTCTGTGGGTCCAACATCATCAATCATTATTGCTGTGACTACACT

GTACTGTTGCATTTGTCCTGTTCAGACACATATTTCATAGAAATGATTGAGTTTTTCCTT

GCTGGGGTGACGCTCATCTTCACATTGGTGTTAGTGATTCTTTCCTACACATACATCATC

AGGACGATTCTGAGAATCCCCTCTGCTCAACAAAGGAAAAAAGCTTTTTCTACTTGTTCC

TCTCACATGATTGTGGTCTCACTTTGTTATGGAAGCTGTATCTTTATGTATATAAACCCC

TCTGTTAAGAATGCAGCCACTTTTAATAAGGGAGTGGCTGTGCTAAATACCTCAATTGCC

CCTCTCTTGAACCCATTCATCTATACCCTAAGGAACCAGCAAGTGAAAATAGCCTTCAAA

GATATGGTTGGTAAGATACAATTATTTTTTCAAGAAAGTAAAACTATTTGA

>LoafORs2.57P

AAAAACCATACAACAGTGACAGTGTTTATCTTAGTAGGATTGACAGAGGACCCACAATTG

AAAATTGTGCTATTTATCTTCCTCCTTCTCACCTACTTGCTAAGCATCTCGGGCAACCTG

GTTATCATTACCCTCACTTTGCTGGATTCTCATCTCAAGACACCTATGTATTTTTTTCTT

CGAAACTTTTCCTTCCTGGAGGTATCTTATACGACAGTCTGTATACCCAAATTGCTTGTT

ACCATGGCAACCGGAGACAAAACAATTACATATAACTGTTGTGCAGCTCAGTTATTTTTC

GCCTTCCTTCTTGGTGCATCTGAATTCTATCTCCTGGCCATCATGTCTTATGATCGTTAT

GTTGCCATCTGTAAGCCTCTGCATTATACAACTATCATGAACAGTAAAATCTGTATCCAG

CTGGTCCTCGGCTCTTGGATGGCCGGTTTCCTTATCATTTTTCCAGGACTCATCTTAGGC

TTAGGCCTGGATTTCTGTGATTCCAATATCATTGACCATTTCTACTGTGACACTGCTCCT

CTCCTGCAAATCTCTTGCACAGATACACATTTGCTGGAAATGATGAGTTTCATTCTAGCT

TTGGTGACACTCCTGGTCACCTTGGTATTAGTGATTCTATCATATACATATATCGCCCTA

ACAATTTTAAAAATCCCTTCTGCCAACCAGAGAAAAAAGGCTTTTTCTACTTGTTCCTCC

CACATGATTGTCATTTCCCTCTCATATGGCAGCTGCATCTTCATGTACATTAAACCTTCA

GCCAAACAGAGAATATATTTAATGAAGGGAGTTTCAGTGGTCAATACTTCGGTGGCTCCA

CTTTTGAACCCCTTCATTTACACTCTAAGGAACCAGCAAGTGAAACAAGCATTTAAGAAC

TTGTTACAAAGAGTTCTGTCTTTATCAAAG

>LoafORs2.58

ATGGTTGACAAGGAAACAAGCAATCATTCAGAAGTGACTGATTTCACTCTTGTTGGCTTC

AGGGTTGGCCCCGAGCTGCATATTCTTCTTTTCCTGCTATTTCTGCTTGTATATGCCATG

ATTCTTCTAGGGAACATTGGGATGATGTCCATTATCATGAATCATCCCCGGCTGAACACA

CCAATGTATTTCTTCCTAGGCAACCTCTCCTTCATTGATCTCTTCTATTCATCTGTGATT

GCACCCAAGGCTATGATCAACTTCTGGTCTGAGAGCAAGTGCATCTCCTTTGCAGGCTGT

GTGACTCAGTTCTTTCTCTTTGCCCTCTTTATTGTGACTGAGGGATTTCTCCTGGCAGCC

ATGGCTTATGACCGCTTCATTGCCATCTGCAATCCACTCCTCTACTCTGTTCAGATGTCA

ACAAGTCTCTGCACTCAGTTGGTGGCTGGTTGCTACTTCTGTGGCTGCATCAGTTCAGTT

CTTCAGACCAGCATGACATTCACCTTATCTTTTTGTGCTTCTCGAGCCATTGACCATTTC

TACTGTGATGGTCGCCCACTTCAGAGGATTTCATGTTCTGATCTCTTTGTCTACAAAACT

ATGACTTTTTCTTTATCCATCCTCATCATATTGCCTACTATCATAGTAATTATTGTTTCT

TACATGTATATTGTGTCTACAGTTCTCAAGATACCCTCCACCGAGGGACGTAAGAAAGCC

TTCTCCACTTGTAGCTCCCACCTTGGAGTCGTGAGTGTGCTGTATGGTGCTGTCTTTTTT

ATGTATCTGACTCCTGACAGATTTCCTGAGCTGAGTAAAGTGGCCTCCTTATGTTACACC

CTAGTCACCCCCATGTTGAATCCTTTGATTTACTCTCTGAGAAACAAAGATGTCAAAGAG

GCTCTGAGAAAGAGCCTGAAGAAAAAAATAGTTTTATTTAACTCTTTTTTAGCAGTGATT

TAG

>LoafORs2.59P

ATGGGTGACAAGGGAGAAGACAGCTACTCGGAGATGACTGACTTCATTCTTGTAGGCATC

AGGTTTCATCCAGAGCGCCACAGCCTCCTCTTCCTACTATTCCTGGTTGTTTGTGGCATG

GTCCTTCTGGGGATCCTTAACATGATTGGCTTCATTGTGACTGATCCCCGCCTGAACACA

CCACTGTATTTCTTCCTTGACAACCCCTCTGTTATTGACCTCTCCTGCTCCACTGTTATT

TTACCCAAATTCATGGTCAATATCCTTTCTCAGAAAAAGATCATATCCTTTGCAGATTGT

GTGGCTCAGCTCTTCTTCTATGCTCTCTAT/ATCCTGGCAGCCATCACCTATGATTGCTA

CATTGCCATCTGCAACCCACTCCTGTATACTGTCTGCATGTCAAGAAGACTCTGTATTCA

GTTGGTAGCTGGTTCCTATCTCTGTCGCTAGGTCAGTTCCATTCTTCAAGTCTGTGTAAC

TTTCTCCATGTCTTCCTGTGTCTTTCAAGTCATTGATCACTTGTACTGTGATTCTAATCC

AACTGAGAAGATCTACTGTTCCAACATCTTTATTAAGAAGATAGTGTCTCTTAGTTTGGC

TTTAATCATTACTATGCCCACAATAGTTCTTATTGTAGAACCTTACATATATATTGTGTT

CATAGTCTTAAAG

>LoafORs2.60P

ATGAGAAACCATACAATGCTGGTAACCTTTATTGGATTGACAGGTGACCCACAATTACAG

GCGGTCATTTCTCTTCTCTTTTTTACCTATGTATTGAGTATTACTGGGAACCTAACCATC

ATCACCCTTACTCTACTAGATTCGCATTTCAAGACACCTATGTATTTCTTTCTCTGACAT

TTCTCATTTTTAGAAATATATTTCACAACAGTCTATATTCCCAAATTTCTTGTTATTATG

GCCACAGGGGATAAGACTATTTCTTACAACTAGTATGTAGCACAGCTGTTTTTTTACTAT

TCTTTTGGGGGCAATAGAATTATTCCTCTTGGTGCTGTGTTCTATGACCACCACACCGCC

ATCAGCAAACTCCTGCATTACATGCCCAGCATGAGCAGCAGAGCCTGCAACCTGCTGATC

TTTGCTTTAGGGTTGTCTGGTTTCCTAGTAGTGTTTCCACCTTGTCTTATAGGTCACCAG

ATTGATTTCTGTGCAATCAATACTATAGAGCATTACTTCTGTGATAGTTTTCCTACATAG

CAGATCCTTTGCACAAGCACATAT/ACTCAGCACAGGAAGAAGGCCTTTTCTACTTGTTT

TTCTCACATGGTAGTTGTCTCCATTCCTTACGGCAACTGCGTTTTCATGTATGTGAAACC

CTCTGCAAAGGAAAGGGTGTTTTTAAATAAACAGATAGCTCTGCTCAGTACTTTTGTTTC

ACCCATGTTCAATCCCTTTGTTTATACACTGAGAAGCAAACAAGTAAAGGATGCTTTTAA

ACACATGGCCAAA

>LoafORs2.61

ATGAGAAACCACACAACTGTGACAACCTTTATTCTTCTTGGACTGACAGATGATCCACAA

TTACAGGTAGTCATTTTTCTTCTTCTCTTTTTCGTCTATATGTTCAGTATCACTGGGAAC

CTAACCATCATCACCCTCACCTTACTCGATTCTCATCTCAAGACACCCATGTACTTCTTT

CTCCGAAACTTCTCATTTTTAGAAATATCCTTTACAACTGTCTGCATTCCCAAATTTCTT

CTTAGCATGGTCACAGGGGATAAGACCATTTCTTACAGCAATTGTGCAGCACAGCTGTTT

TTTACTATTCTTTTGGGGGCAACAGAATTTTTCCTCCTGGCTGCAATGTCCTATGACCGC

TATGTGGCGATCTGCAAACCTCTGCATTACATGACTATCATGAGCAGCAGAATCTGCAAT

CTGCTGATCTTTGCTTCATGGCTGGCTGGTTTCCTAATAATTTTCCCACCTCTTCTTATG

GGTCTTCAGCTTGATTTCTGTGCAGCCAACACTGTAGATCATTTCTTCTGTGATGTTTCT

CCTATATTACAGCTGTCTTGCACAGACACATATATAATAGAATTAATGACACTTCTTTCA

GCCATTTTGACACTCCTGGTTACACTGGTGTTAGTGGTTCTCTCCTACACAAACATCATC

AGGACTATTTTGAAAATACCATCTTCACAACAGAGGAAGAAGGCCTTTTCGACTTGTTCT

TCTCACATGGTTGTTGTCTCTATTTCTTACGGCAGCTGCATTTTTATGTATGTGAAACCC

TCTGCAAAGGAAAGGGTGTCTTTAAATAAAGGAATAGCTCTGCTCAGTACTTCTGTTGCA

CCCATGTTAAATCCCTTCATTTATACGCTGAGAAACAAACAAGTAAAAGATGCTTTTAAA

CACATGGCTAAGAAGATTGAAGTTTTCTCAATAAAGTGA

>LoafORs2.62

ATGAGAAACCATACAAGAGTGACAGTTTTTGTCCTAGCAGGTTTGACTGATGACCTGCAA

TTGAAAGTTGTGTTATTTATTTTCTTGCTTCTCACCTACTTGTTAAGCATTACTGGCAAT

CTGATCATTATCACGCTCACCCTGCTGGATACTCACCTCAAGACCCCCATGTACTTTTTC

CTTCGGAGTTTTTCCCTGCTAGAAATTTCCTATACTACTACTTGCATTCCTAAACTCCTG

GTTATCATGGCAACTGGGGACAAAACCATTTCCTATAACTGTTGTGTCACTCAATTGTTT

TTTGCTTTCCTTCTTGGAGCGTCTGAATTTTACCTGCTGGCTGCTATGTCTTATGACCGC

TATGTGGCCATCTGTAAGCCCCTGCATTACACAACCATCATGAATAGGAAAATCTGCATA

CAGCTTGTCCTCAGCTGTTGGCTTGCTGGGTTCTTTGTCATCTTTCCACCACTCATCTTG

GGCCTTGAGCTCGACTTCTGTGCCTCCAACACAGTTGATCATTTCTACTGTGATGCTACA

CCCCTCCTGCAGGTCTCCTGTTCAGACACACAGCTCCTGGAGACAATGGCTTTTATCTCA

GCCATGGTGACACTCTTGGTCACATTGGTAATGGTGATAATATCATATACCTGTATTGCC

CTGACAATTCTGAAAATCCCTTCAACTAGTCAGAGGAAAAAGGCTTTTTCCACCTGCTCT

TCTCACATGATTGTGATCTCCCTTTCTTATGGCAGCTGCATCTTCATGTATGTTAAACCC

TCAGTCAAACAGAGAATATCATTGTCCAAGGGAATTGCGGTGCTCAATACCTCAGTTGCA

CCACTTCTGAACCCTTTCATCTATGCTCTAAGGAACCAACAAGTGAAAAAAGCCTTCACA

AATTTGATGCACAGAATTATCTCTTTTTCAAAGAACTGA

>LoafORs2.63P

AAGAACCAGTCAGTGGACATAGAGTTCGTTCTTCTTGGGCTAACTGATGATCCTCTGATG

CAAACGGTGATTTTCCTGTTTCTCTTTCTCAACTATGTTTTGAGCCTGTTGGAGAACTTG

TCCATCATCCTCCTCACGCTGCTGGATCCTCACCTCAAGACGCCAATGTATTTCTTCCTC

CGAAATTTCTCTTTTTTAGAAGTTTTGTTCACGAGGGTTTGCGTTCCACTGTTTCTGACT

ACCATTTTGACTGGAGACAAAACAATTTCCTATAATGGTTGTGCAGCTCAATTATTTTTT

/TTTTTCATCCTTTTACTGGGAGTTACAGAGTTTTACCTTCTGGCCGCCATGTCCTATGA

CCGCTACGTTGCCATCTGCAAGCCGCTGCATTATCCCATCATCATGAGCAGCAGAGTGTG

CTACCAACTTGTGCTCAGTTCTTGGGTAACTGGATTCCTAATCATCTTTCCCCCTTTGGT

CTTGGGACTCCAGCTGGATTTTTGTGCTTCCAAAACTATTGATCACTTCCTGTGTGATAC

TTCTCCTATCCTGCAGATCTCTTGAACAGATACTCGATTAATAGAATTGATGGCCTTTGT

CTTAGCTGTAGTGACACTGGTGGTCACGTTGTTGTTAGTAATCCTCTCGTATACATACAT

CATCAAAACTATTCTAAAATTCCCTTCTGCTCAACAATGAAAAAAGGCCTTTTCCACCTG

TTCCTCACACATGGTTGTTGTCTCCCTTACTTACGGGAGTTGTGTCTTTATGTACATGAA

ACCATCAGCAAAAGAAAGGGTGACTTTAACTAAAGATGTAGCTGTGCTCAATACTTCTGT

TTCCCCTTTACTAAACCCCTTCATTTATACCCTAAGGAACCAGCAGGTGAAAGAAGCCCT

CAAGGATATGCTTCAAAGAGTTTGTTAT

>LoafORs2.64

ATGAAGAACCAGTCACTGGAAATAAAGTTCATTCTCCTGGGACTGACAGATGACCCACAA

TTACAAATCGTGATTTTCTTCTTTCTCTTTCTCAACTATACATTTAGCACTACAGGGAAT

TTAATTATTGTCCTCCTTACCCTGTTGGATGCGCGTCTCAAGACTCCAATGTATTTCTTT

CTCCGAAATTTCTCCTTTTTGGAAATCTTATTCACGACAGTGTGTATTCCCAGATTCCTA

ATAACCCTTGTGACTAAGGATAAAACCATTTCTTACAATAATTGTGCAGCTCAATTATTT

TTCATCCTTTTACTGGGAGTTACAGAGTTTTACCTTCTGGCCGCCATGTCCTATGACCGC

TACGTTGCCATCTGCAAGCCACTGCATTATCCCATCATCATGAGCAGCAGAGTGTGCTAC

CAACTTGTGCTCAGTTCTTGGGTAACTGGATTCCTAATCATCTTTCCCCCTTTGGTCATG

GGTCTCAAGCTAGATTTCTGTGCTTCCAAAATAATTGATCATTTTGTGTGTGAAACTTCT

CCCATCCTGCAGATATCCTGCACAGATACACGTGTCCTAGAATTGATGTCTTTTGTCTTA

GCTGTGATGACGCTTGTGGTCACTTTAGTGTTGGTGATTCTGTCTTACACTTACATCATT

AGGACCATTCTGAAATTCCCCTCTGCACAGCAAAGGACCAAAGCTTTTTCCACCTGTACT

TCCCACGTGGTTGTTGTCTCCATGACTTATGGTAGCTGTATCTTTATGTATATAAAACCA

TCTGCGAAAGAAAGAGTGACTGTATCCAAAGGCATAGCTTTGCTCTATACCTCAGTTGCC

CCTTTACTAAATCCCTTTATTTACACTCTAAGGAACCAGCAGGTAAAAGAAGTCTGCTGG

GATGTGTTACAGAAGATTTTGTGTTTTTCAAAAAAAGTGATTTAA

>LoafORs2.65P

TTTTTATATTTCTCTTTCTCAACTACCTTTTGAGTGGGGAACTTATCCATTATCCTTCTT

ACCTTACTGGATCCTCGGCTCAAGACTCCAATATACTTCTTCCTCTGAAATTTTTCCTTC

TTGGAAATCTCATTGACAACAATCTGCATTCTTAGATTCCTGACAATCATTGTGACTGAA

ATCAAAATCATTTCCTACAAAGATTGTGCATTTCCATTATTCTTTTTCCTTTTGGTAGCA

ATTAGAGAGTCTTACCTTCTGGCCACCATGTCTTGTGACCGCTATGTAGCCATCTGCAAA

CCCTTGCATTATTCCATCATTATGAGAAGCCAAGTGTGCTATCAACTTGTACTCAGTTCA

TGGGCAGCTGGCTTTCTGAATACCTTCCCACCATTGGTCATGGGAGTGAAACTGGAATTC

TGTGGTTGCAAAGTAATTGATCATTTCATGTGTGACACTTCTCCTATCTTACAGATTTCT

TGCACAGATGCTCACTTCCTAGAATTGATTTCATTTGTTTCATCAGCTATAACACTTGTG

GCCACATTGCTGTTAGTGATTTTT/TTTTCCTATGCATATATAATCAAGACCATTCTAAA

AATTCCCTCTGCTCAGAAAAGAACAAAAGCTTTTTCCACTTGTTCTTCCCACATGATTGT

AGTCTCCCTTACATATGGTAGCTGTGTCTTCGTTTACATGAAGCCATCAGCAAAAGAAAG

GGTGACTTTATCCAAAGGTGTAGCTGTTATCTATACCTCAGTTGCCCCTTTACTCAATCC

CTTCATTTATAGTCTAAAGAATCAGCAGGTGAAACATGCTTTCAAGGATACACTCAAAAA

GATTTACATTTTTTTCAAAAAATAAGGGAAAAAAATTAAATCT

>LoafORs2.66P

ATGATGGGCAAATTATCCATCATCCTCCTCACCTTCCTGGATCCTTGGCTCACGGCTCCA

ATGTAATTCTTCCTCTGAAATTTCTCCTTGGAAATCTTGTTGACAACCACCTGTATTCCT

AGATTCCTGACAACCATTGTGACTAAAAACAAAATCATTGCCTACAATAATTGCACATCT

CAATTATTCTTTTTTCTTTTATTAGAAGTTACAGAGTTTAACCTTCTGGCCGCCATGTCT

TATGACAGTTATGTAGCCATCTGCAAACCCCTGCATTATCCCATCATTATGAGAAGCGAA

GCATGTTACCAACTTGTACTCAGTTCGTGGTTAGCTGGCTTTCTGAATATCTTTCCAACA

TGGGTCTTGGGGCTTAAATTAGAATTCTGTGCTTCCAAAGTAATTGGTCATTTCATATGT

GACACTTCTCCACTCTTGCAGATTTCTTGCACAGACACTGGCTCCCTAGAATTGGCTTCA

TTTGTTTCAGCAGGTGTAATTTTTGTGACCACATTGCTGTTAGTGATTTTTTCCTATAGA

TATATAATCAAGACCATTCTAAAAATCCCCTCTGCTCAGAAAAGAACAAAAACTTTTTTC

ACTTGTTCTTTCTACTTGATTGTAGTCTCCCTTACTTATGGTACCTGTATCTTCATTTGC

ATGAAGCCATCAGTAAAACAAAGGGTAGCTTTATCCAAAGGTGTAGCTGTTATCTATTCC

ACAGTTGCCCCTTTATTAAATCCCTTTATTTACATTCTAAGGAACCCTGAA

>LoafORs2.67P

ATGAGAAATCACACAATAATTACAGAGTTTGTACTCTTGGGCATATCAGATGATCCAAAG

CTTCAGGTTGTGATCTTTATCTTTTTATTTATAGCTTATGTATTAAGTATCACAGGCAAC

CTGACCATCATCAGCCCCACCTTGACAGACTCTCCTCTAAACACTCCTGTGTACTGCTTC

CTCCAGAGCTTCTCCTTAGAAATTACATTCGCCATTGTGTCTATCCCCAGGTTTCTGGGG

ACAATCATTACTAAAGTCAAGACCATTTCTTACAATGATTGTTTAGCTCAATTATTTTTC

TTCACCTTCATGGGTGTGTCTGAATTTTTTCTTCTAACTGCCATGTCTTACGATCATTAT

GTTGCCATCTGCAAGCCCTTTCATTACACCACCATCATGAACAAGAAAATCTGCGCTCTG

CTTGTTCTTTGTTCATGGCTGGGAGGATTCCTGACCATTTTCCCACCACTCATGCTTATC

CTCCAGTTAGATTTCTGTTCTTCCAGTGTCATTGACATTGTGACT/CATTGACATTGTGA

CTACTCCCCCATCTTACAACTCTCATGCACAGATACCTGGCTTTTAGAGATGATTGGCTG

TTACTTTCCTTTTGTTCCTTTGCTATTCACGTTGGCGTTAGTGATTCTCTCCTACTTGTG

CATCGTTATCACCATTCTGAGAACCCCTTCTGCCAGTCAGAGGAAAGAGGCTTTCTCCAC

TTGTTCTTCTCACATGATCGTCATTTCCATCTCTTATGGCAGCTGTGTATTCATGTACAT

CAAGCCTTTAGCAAGAGAAAGAGCATCAGTGACCAAAGGAGTAGCTACTCTCAACACTTC

GATTGCCCCCATGCTGAACCCCTTCATTTACCCCCTGAGGAACAAGCAAGTAAAACAAGC

CTTCAAAGGCTTGATCCATAAAACAGGATTTCCAGAAAATAAATGAAAGTATGTATTGAC

A

>LoafORs2.68

ATGAGAAACCATACAGCAATAACAGAGTTTGTCCTCTTGGGAATGTCAGATGACCCAAAG

CTTCAGATTGTGATTTTTGTCTTTCTGTTCATCACCTACATGCTCAGCATCACTGGGAAC

CTGACCATTATCACCCTCACCCTGCTGGATTCCCACCTCCAGACCCCCATGTATTTCTTC

CTCAGGAATTTCTCCTTATTAGAAGTTTCATTCACAACTGTCAGCATACCCAGATTCCTG

GGCACCATTATTACAGGAGATAAAACCATTTCCTTTAATAACTGCATTGCTCAGTTATTT

TTTTTAATTCTCTTGGGGGTCACTGAGTTTTACCTTCTGGCTGCCATGTCCTATGACCGC

TACGTGGCCATCTGCAAACCCCTGCATTACGTGACTATCATGAATCGCAGAGTCTGCGCA

CTGCTTGTCTTCTCTTCATGGCTGGCTTCATTCTTACTCGTATTCCCTGTGCTCATGTTG

CTGTTAAAGCTTGATTACTGTAGATCTAACATTATTGACCATTTTACCTGTGACTATTTT

CCCCTGCTGCAACTTTCTTGTTCAGACACAAAATTCCTAGAGATGATAGGTTTTTCCTGT

GCTGTGTTTACTTTAATGTTCACGTTGGCATTAGTAATTCTGTCTTACATATATATCATC

AGGACAATTTTGAGAATTCCTGGTACTAGTCAGAGGACAAAGGCCATTTCCACATGTTCT

TCCCACATGATTGTCTTATCTATCTCTTATAGTAGCTGTATTTTCGTGTATGTTAAACCT

TCAGCAGAAGAGAGGGTGTCTTTGAGCAAAGGCGTAGCTGTACTAAACATCTCAATAGCT

CCCATGCTGAACCCTTTTATTTATAGCCTAAGAAATCAACAAGTCAAGCAAGCTTTCATG

GACTTGGCAAGGAGGACTGTATTTTTCACAAGCAAATCAAAAGATGTGGTGTCATGA

>LoafORs2.69

ATGAACAACCACACAGTGGTCACAGAGTTTGTCCTCCTAGGCCTTTCTGATGACCCTGAC

CTTCAGATTGTGATCTTCCTCTTTCTATTTATCACATATGTATTAAGCGTCACTGGAAAC

CTGACTCTCATCACCCTAACCTTCTTGGACTCGCATCTACAGACACCTATGTATTTCTTC

CTGAGGAACTTCTCCTTCCTAGAAATCTCCTTTACGACTGTATGTATTCCTAGATTTCTA

GGTGCAATTATCACCAGGGATAAGACCATTTACTGTAACAACTGTGCAGCTCAACTCTTC

TTCTTTATTTTCATGGGGGTGACAGAATTTTACATTCTGACGGCCATGTCCTATGACCGC

TATGTGGCCATCTGCAAGCCCCTGCATCACACAAGCATCATGAACAGGAAATTCTGCTCC

CTGCTTGTGTTATGTGCATGGCTGGGAGGGTTTTTGACCGTTTTCCCACCCCTAATGCTC

CTCCTCCAGCTGGATTACTGTGTTTCCAATGTCATTGATCACTTTGCCTGTGACTATTTT

CCCCTCTTACAGCTATCTTGCTCAGATACATGGCTCCTAGAAGTAATTGGTTTTTACTTT

GCTTTGGTTACTTTGCTATTCGCTTTGGCATTAGTGATTTTGTTCTACATGTACATCGTC

AGGACTGTTCTGAGAATCCCGTCTGCCAGTCAGAGAAAGAAAGCTTTCTCTACTTGTTCA

TCTCACATGACTGTCATTTCCGTCTCTTATGGAAGCTGCGTCTTCATGTATGCCAATCCC

TCTGCAAAAGAAAAGGCATCATTGACCAAAGGAGTTGCTATTCTCAACACCTGTGTTGCC

CCCATGCCGAACCCCTTCATTTATTCCCTGAGGAACCAGCAAGTAAAACAAGCTTTCAAA

GATTTGCTCCAGAAAGTAGTGTTTTCTGCAACTAAAGGAAATTAA

>LoafORs2.70

ATGAAAAACTACACAGACGTAACAGAGTTTGTCCTGTTGGGACTGTCAGATGACCCAAAG

CTTCAGATTGTGATTTTTGTCTTTCTGTTCATCACCTACATGCTCAGCATCACTGGGAAC

CTGACCATTATCACCCTCACCCTGCTGGATTCCCACCTCCAGACCCCCATGTATTTCTTC

CTCAGGAATTTCTCCTTATTAGAGGTTTCATTCACAACCGTCAGTATACCCAGGTTCCTG

GGCACCATTATTACAGGAGATAAAACCATTTCCTTTAATGATTATATGGTTCAGTTATTT

TTCTTCATTTTTTTGGGAGTCACAGAGTTTAATCTTCTGGCTGCCATGTCATATGACCGC

TATGTGGCCATCTGTAAACCCCTGCATTACACGACCATCATGAATCTTAGAGTCTGCACT

CTGCTTGTCTTCACTTCTTGGCTGGCTTCATTCTTAATCATATTTCCATTACTTATGCTA

TTCACACAGCTTGATTACTGTACATCCAATGTTATCGAGCATTTTGCTTGTGATTATTTC

CCCTTATTATGCCTTTCTTGTTCAGATACAAAATTCCTAGAGTTAACTGGGTTTTCCTGT

GCTGTCTTTACTCTACTGTCCACCTTGGCATTAATAATTCTGTCTTACATATATATCATC

AGAACAATTTTGAGAATTCCCTCTGCTAGCCAGAGGACAAAGGCCTTTTCCACATGTTCA

TCCCACATGATTGTCATCTCCATCTCTTATGGCAGCTGCATTTTCGTGTATATTAATCCC

TCAGCAAAAGACAGGGTGTCTTTGAGCAAGGGAGTAGCTGTGTTAAACACCTCAGTAGCT

CCCATGCTGAACCCGTTTATTTACAGCCTGAGGAATCAGCAGGTCAAGCAAGCTTTCATG

GACCTGGTAAGGAAGATTGCATTTTTCTCAAGCAAGTGA

>LoafORs2.71P

TCAGAGTTTGACCTCCTAGGCCTTTCTGATGATCCTGACCTTCCAATTGTGACCTTCCTC

TTTCTATTTGTCACATATGCATTAAGCTTCACTGAAAACCTGACTCTCATCACCCTAACC

TTGGTGGACTCCCATCTACAGACACCTATCTATTTCTTCCTCTGAAACTTCTCCTTCTCC

TTTGCAACCATATCTAAAACCCAAAAAACCAAACTCATTGCTGTCATGTAGATACCAACT

CATAGTGACCCTATAGGACAGAGCAGAATTGCCCCATAGGGTTTCCCAGGAGTGCTGGCG

GATTCAAACTGCTGACGTTTTGGTTAGGAGACATAACTTAACCGCTCTGCCAGCTACAAT

TATCACCAGGAATAACACCATTGCCTATAACAACTGGGCAGCTCAAGGCTTTTTCTTTAT

TTTCATGGGGGTGGCAGAAATTTACCTTCTGCTGGCTATGTCCTATGACCGTTATGTGGC

CATTTGCAAGCTCCTGCATTGTGCAACCATCTTGAACAGGAAACTCTGCTCCCTGCTTGT

GTTATGTGCGTGGCTAGGAAGATTTCTGACCATTTTTCCACCCTTTATGCTTCTCCTCAG

TTGGATTACTGTGCTTCCAATGTCATTGATCACATTGCATGTGACTATTTTCCCCTCTTC

CAGCTATCTTGCTGAGATACATGGCTCCTAAAAGTAATTGGTTTTTACTTTGCTTTGGTT

ACTTTGCTATTCACTTTGGCATTAGTGATTTTGTCCTACATGTACATCATCAAGACTATT

CTGAGAATCCCATCTGCCAGTCAGAGAAAAAAAAGCTTTCTCCACTTGTTCCTCTAACAT

GATTGTCATTTCCATCTCTTATGGAAGCTGCGTCTTCATGTATGCCAATCCCTCTGCAAA

ACAAAAGGCATCATTGACCAAAGGACTGGCTATTCTGTTGCCCCCATGCTGAGCCCCTTC

ATTTATTCCCTGAAGAACCAGCAAGTAAAAGAAGTCTTCAAAGACTTGCTCCAGAATGTA

GTG

>LoafORs2.72

ATGAGAAACCATACAGCAATAACAGAGTTTGTCCTCTTGGGACTGTCAGATGACCCAAAG

CTTCAGATTGTGACTTTTGTCTTTCTACTTATCACCTACATGCTCAGCATCACTGGGAAC

CTGACCATTATCACCCTCACCCTGCTGGATTCCCACCTCCAGACCCCCATGTATTTCTTC

CTCAGGAATTTCTCCTTATTAGAGGTTTCATTCACAACTGTCAGTATACCCAGGTTCCTG

GGCACCATTATTAGCGGAGATAAAACCATTTCCTTTAATAACTGCATTGCTCAGTTATTT

TTCTTCATTCTCTTGGGAATCACTGAATTTTACCTTCTGGCTGCCATGTCCTATGACCGC

TATGTGGCCATCTGCAAACCCCTGCATTATGTGACTATCATGAATCGCAGAGTCTGCACA

CTGCTTGTCTTCTCTTCATGGCTGACTTCAGTCTTAATCATATTCCCAGCGCTCATGTTG

CTGTTAAAGCTTGATTACTGTAGATCTAACTTGGACCATTTTACCTGTGATTATTTTCCC

CTGCTGCAACTTTCTTGTTCAGACACAAAATTCCTAGAGGTAATGGGTTTCTCCTGTGCT

GTGTTTACTTTACTGTTCACGTTGGCATTAATAATTCTGTCTTACATATATATCATCAGA

ACAATTTTGAGAATTCCTTGTACTAGTCAGAGGACAAAGGCCTTCTCTACGTGTTCTTCC

CACATGATTGTCATCTCTATCTCTTACGGTAGTTGCATTTTCGTGTACATTAAACCCTCA

GCAAAAGACAGGGTGTCTTTGAGCAAGGGAATAGCTGTGCTAAACACCTCAGTAGCTCCC

ATGCTGAACCCATTTATTTACAGCCTGAGGAATCAACAAGTCAAGCGAGCCTTCATGGAC

ATGGCAAGGAGGACTGTATTTTTCACAAGCAGATGA

>LoafORs2.73

ATGAAAAATCAGTCAGTGGAGATAGAGTTCATTCTCTTGGGACTGACAAATGACCCAGAG

TTGCAAATTGTGATTTTTATATTTCTCTTTCTCAACTACATTTTGAGTGTGACGGGGAAC

TTATCTATCATCCTCCTCACCCTGTTAGATCTACGCCTCAAGACTCCAATGTATTTTTTT

CTCCAAAATTTCTCCTTGGAAATCTTATTGACAACAATCTCTATTCCTAGATTTCTGACA

AGCATTGTGACTAAAAACAAAATCATTTCCTACGATGGTTGTGCATCTCAACTATTCTTT

TTCCTCTTAATATGTGTTACAGAGTTTTACCTTCTGGCCGCCATGTCTTATGACCGTTAT

GTAGCCATCTGCAAACCCCTGCATTACCCCATCATTATGAGCACCAAAGTGTGCTACCAA

CTTGTACTCAGTTCTTGGGCAGCTGGCTTTCTGAATACTTTTCCACCGTTGGTCATAGGG

CTGAAACTGGAATTCTGTGCTTCCAAAGTAATTGATCATTTCATGTGTGACACTTCTACT

GTCTTGCAGATTTCTTGCACAGACACACGTTTCCTAGAATTGATTTCATTTGTTTTATCA

GCTATAATACTTGTGGTCACATTGCTGTTAGTGATTTTTTCCTATACACATATAATCAAG

ACTGTTTTAAAAATCCCCTCTGCTCAGAAAAGAACAAAAGCTTTTTCCACTTGCTCTTCC

CACATGATTGTAGTTTCCCTTACTTATGGTAGCTGTATCTTTATTTACATGAAGCCATCA

GCAAAAGAAAGGGTGACTTTATCCAAAAGTGTAGCTGTTATATATACTTCATTTGCTCCT

TTATTAAATCCCTTCGTTTACAGTCTAAGGAACCAGCAAGTGAAACAAGCTTTCAAGGAT

ACACTCGAAAAGATTTTCACTGTTTTCAAAAAATGA

>LoafORs2.74P

ATCTCTATTCCTAGATTCTTGACAACCATTGTGACTAAAAACAAAATCGTTTCCTACAAT

GATTGTATATCTCAACTATTCTTTTTTCTTTTGTTAGGAGTTACAGAGTTTTACCTTCTG

GCTGCTGTGTCCTATGACCGTTATGCAGCCATCTGCAAACCCCTGCGTTACTCCATCATT

ATGAGAAGCAAAGTGTGCTACCAACTTGTACTCAGTTCATGGACTGCTGGCTTTTCTGAA

TACCTTTCCACCATTGGTCTTGGGACTAAA/CTTCTCCTATCTTGCAGATTTCTTGCACA

GACACACTTCCTAGAAATGATTTTGTTTGTTTTCACAGTTGTAACACTTGTTGTAATTCT

TTCCTATACATATATAGTTAAGACCATTCTAAAAATCCCCTCTGCTCAGAAAAGAACAAA

AGCTTTTTCCACTTGTTCTTCCCACATGATTGTAGTCTCCCTTACTTATGGTAGCTGTAT

CATCTTTATTTACATGAAGCCATCAGCAAAAGAAAGGGTGGCTTTACCCAAAGGTGTAGC

TGTTTCTATACCTCAGCTGCTCCTTTACTCAATCCCTTCATCTTAGGAACCAACAAGTGA

AACAAGCTTTCAAGGATACACTAAAAAAAGTTTTCATTTTTTTTTAAAA

>LoafORs2.75

ATGGAATTCAGAAGAAATTTAACCATGAGAAACCGTACAATGGTGACAACATTTACTCTT

ATAGGACTAACTGATAATCAAAACTGGCAAATTGTGATTTTTCTTTTTTTATTTCTAACA

TATTTATTGAGTATCACTGGAAATCTGACCATTATCCTGCTCACTCTATTGGATTCCCAT

CTCAAAACACCCATGTATTTCTTCCTTCGGAATTTTTCACTTTTAGAAATGTTGTTTACA

TCTGTGTGCATCCCTAGGTACCTGGTCAGCATTGTGACTATGGATAAAACAATTTCCTAC

GATGCTTGTATGACACAATTATTTTTTGCCATCTTCTTGGGTGCATCAGAGTTTTTCCTG

TTGACTGCCATGTCCTATGACCGCTATGTGGCCATCTGCAAACCCCTTCACTATGCAACA

ATCATGAACAACAGAGTCTGCACCCAGCTGGTCGTTACCTCCTGGGTGGCTGGGCTGTTA

GCCATCTCTCCAGGACTCATCTTGTGTTTGAGGTTGGAATTCTGTGATGACAACATTATT

GACCACTTTGGCTGTGACTATTCTCCTCTACTGAAACTCTCCTGCACAGACACATGGTCC

ATAGAATTGTTAGCTTTTATTTCAGCCACTGCCATATTACTGATTACATTGGCACTCGTG

GTGCTCTCCTATGTAAATATTATAAGAACAATTCTGAAGATCCCTTCTGCCCAGCAGAGG

AAGAAGGCTTTTTCCACCTGTTCCTCCCACATGATTGTTGTCTCTATCTCTTATGGCAGC

TGCATTTTTATGTATATGAAACCTTCTGCAGAGGAAAGAGTAGCTTTAAACAAGGGGGTA

GCAGTGCTCAACTCTTCAATTGCACCTCTCTTAAATCCTTTCATATATACCCTAAGAAAT

GAGCAAGTAAAACAAGTCCTGAAAGGCATAGTTCAAAAATGTATTATTACCTTAAAAAAA

AAATAG

>LoafORs2.76P

ACTCCTCTACTGAAACTCTCCTGCACAGACACATGGTCCATAGAATTGTTAGGTTTTATT

TCAGCCATTGCCATATTACTGATTACATTGGCACTCGTGGTGCTCTCCTATGTAAATATT

ATAAGAACAATTCTGAAGATCCCTTCTGCCCAGCAGAGGAAGAAGGCTTTTTCCACTTGT

TCCTCCCACATGATAGTTGTCTCTATCTCTTATGGCAGCTGCATTTTTATGTATATGAAA

CCTTCTGCAGAGGAGAGGGTCGCTTTAAACAAGGGGATAGCAGTGCTCAACACCTCAATT

ACACCTCTCTTAAAACCTTTCATATATACCTTAAGAAATAAGCAAGTAAAAGAAACCCTG

AAGGACATAGTTCAAAAATGTATTATTACCTTAAAAAATAGCTTTTGTTTTTTAAAGGAA

ACCACTAAGGGTCAT

>LoafORs2.77

ATGAAATTCAGAAGAAATTTAACCATGAGAAACCACACAATGGTGAAAACGTTTATTCTT

TTAGGACTAACCGATGATCCAAACTGGCAAATTATAATTTTCCTTTTACTATTTCTAACA

CATTTATTGAGTGTCACTGGAAATCTGACCATTGTACTGCTCACGCTATTAGATTCCCAA

CTCAAAACACCCATGTATTTCTTCTTTCAGAATTTTTCATTTTTAGAAATGTCATTCACA

TCCAACTGTATCCCCAGGTACCTATTCAGCATAATGGCTAAGGATAAAATGATTTCCTAT

GATGCTTGTATGACACAATTGTTTTTTGCCATTTTCCTGGGCGCATCAGAGTTTTTCCTG

TTGACCGCCATGTCCTATGATCGCTATGTGGCCATCTGCAAACCCCTTCACTATATGACG

ATCATGAACAACAGAGTCTGTACCCAGCTGGTTGTTACCTCTTGGTTGGATGGGTTGTTA

GCAATCTCTTCTGGGCTTATCTTGTGCTTGAGGTTGGAATTCTGTGATGCCAACATTATT

GACCACTTTGGCTGTGACTATTCTCCTGTCCTGAAACTCTCCTGCTCAGACACACGGTCC

ATAGAATTGTTAGGTTTTATCACAGCCATTGTCATACTGCTGATTACACTGGCACTGGTG

ACACTCTCCTATGCGTATATTCTGAGAACAATTCTGAAGATCCCTTCTGCCCAGCAGAGG

AAGAAGGCTTTTTCCACCTGTTCCTCTCACATGATTGTTGTCTCTCTCTCTTATGGCAGC

TGCATTTTTATGTATATTAAACCTTCTGCAGTGGAAAGGGTAGCTTTAAACAAGGGGATA

GCAGTGCTCAACACTTCAATTGCACCTCTCTTAAATCTTTTTGTATATACCCTAAGAAAT

AAGCAAGTAAAACAAGCCCTGAAAGACGTAATTAAAAGATGTATCTTTAGTACTTAA

>LoafORs2.78

ATGAGAAACCAAACCGTACCCACAGAATTCATTCTTCTAGGACTATCAGATGACCCAGGG

CTTCAGATGGTGATTTTTCTCTTTTTAATTATCACATATATATTAAGCGTCACTGGGAAT

TTGACCATCATCACTCTCACCTTGGTGGACGCTCATCTACAGAGCCCTATGTATTTCTTC

CTTAGGAACTTCTCTGTATTAGAAATATCCTTTACGACTGTCTGTATCCCTAGATTCCTG

GGCACAATTATTACTAGAGACAAGACTATTTCATACAATAATTGTACAGCTCAGTTGTTT

TTCTTCATTTTCATGGGTATAACTGAATTTTACCTTCTTACGGCCATGTCCTATGATCGC

TATGTTGCCATCTGCAAACCCCTGCATTACACTACCATCATGAACAACAGAGTCTGTATG

CTCCTTGTCTTTTGTGCTTGGCTGACAGGATTTTTAAATATCTTCCCACCAGTTATTCTT

TTTCTCCAGCTGGATTACTGTGGCTCTAATGTCATTGATCATTTTGCTTGTGACTATTTT

CCCCTCTTGCAATTATCCTGCTCAGACACATGGCTCCTAGAAGTGATTGGTTTTTACTCT

GCAATAGTGATTCTACTTTTCACTTTGGCATTAATAATCCTGTCATACGTCTTCATCATT

AGGACAATTCTGAAACTCCCTTCTGCCAGTCAGAGAAAAAAAGCTTTCTCCACTTGTTCT

TCACACATGATTGTCATTTCCATCTCTTACGGAAGCTGTATCTTCATGTATGCCAACCCT

TCAGCAAAAGAAAAGGCATCATTGACCAAAGGAGTGGCTATTCTCAATACTTCTGTTGCT

CCTATGATGAATCCATTCATATACACTCTCAGGAACCAGCAAGTGAAGCAAGCCTTTAAG

GGCACGATCCAAAAGATTATATTTTTCACTGGTAAATGA

>LoafORs2.79

ATGAAAAACTACACAGAAGTAAAAGAGTTTATTCTCTTGGGATTGTCAGATGATCCAGAG

GTTCAGGTTGTGATTTTTGTCTTTCTGTTCATCACCTACATGCTCAGCATCACTGGGAAC

CTGACCATTATCACCCTCACCCTGCTGGATTCCCACCTCCAGACCCCCATGTATTTCTTC

CTAAGGACTTTCTCCTTATTAGAAGTTTCATTCACAACTGTCAGCATACCTAGATTCCTG

GGCACCATTATTACAGGAGATAAAACCATTTCCTTTAATGATTGTATGGCTCAGTTGTTT

TTCTTCATTCTCTTGGGAGTAACTGAATTTTACCTTTTGGCTGCCATGTCCTATGATCGC

TATGTGGCCATCTGTAAACCCCTGCATTACACGACCATCATGAATGGTAGAGTCTGCACA

CTGCTTGTCTTCTCTTCTTGGCTGGCTTCATTCTTAATCATATTTCCATCACTCATGCTA

TTCATACAGCTTGATTACTGCAAGTCCAATGTTATTGACCATTTTACCTGTGATTATTTT

CCCTTATTATACCTTTCTTGTTCAGACACAAAATTCCTAGAGTTAACTGGGTTTTCCTGT

GCTGTGTTTACTCTAATGTTCACTTTGGCGTTAATAATTCTGTCTTACATATATATCATC

CGAACAATTTTGAGAATTCCTTCTACTAGCCAGAGGACAAAGGCCTTTTCCACATGTTCA

TCTCACATGATTGTAATATCCATCTCTTATGGCAGCTGCATTTTCATGTATATTAATCCA

TCAGCAAAAGACAGGGTTTCTTTGAGCAAGGGAGTAGCTGTGCTAAACACCTCAGTAGCT

CCCATGCTGAACCCATTTATTTACAGCCTGAGGAATCAGCAAGTAAAAGTAGCTTTCATG

GACATGGCAAGGAAGACTGCATTTTTCTCAAGCAAGTGA

>LoafORs2.80P

TCAGCTATGAGAAACCAAACCGTACTCACAGAATTCTTTCTTCTAGGGCAATCAGATGAC

CCAGAGCCTCAGGTGGTGATTTTTCTTTTTAATTATCACATTACTGTCACTGGGAATTTG

ACTGCCATCACTCTCACCTTGGTGGACACTCATCTACAGAGCCCTGTGTATTTCTCCCTT

AGGAACTTCTCTGTATTAGATATATCT/CCTAGATTCTTGGGCACAATTATTACTAGAGA

CAAGACTATTTCATACAATAATTATACAGCTCAGTTGTTTTTCTTCATTTTCATGGGTAT

AACTGAATTTTACCTTCTAACTGCCATT/TCCTATGATTGCTATGTTGTCTTCTGCAAAC

CCCTGCATTACACGACCATCATGAACAAGAGAGTCTATATGCTCCTTGTCTTTTGTGCTT

GGCTGACAGGATTTTTACATATCTTTCCACCAGTTATTCTTTTTCTCCAGTTGGATTAGT

GTGGCTCCAGTGTCATTGATCAT

>LoafORs2.81

ATGAAAAACTACACAGAAGTAACAGAGTTTATCCTCTTGGGATTGTCAGATGACCCAAAG

CTTCAGGTTGTGATTTTTGTCTTTCTGTTCATCACCTACATGCTCAGCATCACTGGGAAC

CTGACCGTTATCAGCCTCACTCTGCTGGATTCCCACCTCCAGACCCCCATGTATTTCTTC

CTCAGGAATTTCTCCTTATTAGAGGTTTCATTCACATCTGTCAGTATACCCAGGTTCCTG

GGCACCATTATTACAGGAGATAAAACCATTTCCTTTAATGATTGTATGGCTCAGTTATTT

TTCTACATTCTCCTGGGAGTGACTGAATTTTACCTTCTAGCTGCTATGTCCTATGACCGC

TATGTAGCCCTCTGTAAACCCCTGCATTATACAACCATCATGAATGGTACAGTCTGCACA

GTGCTTGTCTTCTTCTCTCAGCTGGCTTCATTCTTAATCATATTCCCTGCACTCATGCTA

GTCACACAGCTGGGTTACTGTAAGTCCAATGTTATCGATCATTTCACCTGTGGTTATTTC

GCCTTATTACACCTTTCTTGTTCAGACACAAAATTCCTAGAGTTAACTGGGTTTTCCTGT

GCTGTGTTTACTCTAATGTTCACTTTGGCATTAGTAATTCTGTCTTACATATATATCATC

CAAACAATTTTGCGAATTCCTTCTACTAGCCAGAGGACAAAGGCCTTTTCCACATGTTCA

TCCCACATGATTGTCATCTCTATCTCTTATGGCAGCTGCATTTTCAGGTATATTAATCTG

TCAGCAAAAGACAGGGTGTCTTTGAGCAAGGGAGCAGCTGTGCTAAACATCTCAGTAGCT

CCCATGCTGAACCCATTTATTTACAGCCTGAGGAATCAGCAGGTCAAGCGAGCTTTCATG

GACCTGGTAAGGAAGATAGTATTTTTCTCAAGCAAATGA

>LoafORs2.82

ATGGAATTCAGAAGGAATTTAACCATGAGAAACCATACGGTGGTGACAACATTCATTCTC

GTAGGACTAACTGATGATCCAAACTGGCAAAGTGTGATTTTTCTGTTTCTATTTCTAACA

TATTTTTTGAGTGTCACTGGAAATGTGACCATTATCCTGCTCACTTTACTGGATTCCCAC

CTCAAAACACCGATGTATTCCTTCCTAAGGCATTTTTCATTTTTAGAAATGTCATTCACA

TCCGTCTGCATCCCTAGGTACCTGGTGAGCATTGTGACTCTGGATAACAGGATTTCCTAT

GATGCATGTGTGACACAATTGTTTTTTGCCATCTTCTTGGGTGCATCAGAGTTTTTCCTG

TTGGCAGCCATGTCCTATGACCGCTATGTGGCCATCTGCCAACCCCTTCACTATGCAACA

ATCATGAGCAGCAAAGTCTGCACCCAGCTGGTCGTTACCTCCTGGGTGGCTGGGTTGTTA

ACCATCTCTCCTGGACTTATCATGGGCTTGAGGTTGGAATTCTGTGATGCCAACATTATT

GACCACTTTGGCTGTGACTATTCTCCTCTCCTGAAACTCTCCTGCACAGACACACGGTCC

ATAGAATTGTTAAGTTTTATTTTAGCCATTGCCACACTCCTGATTACACTGGCACTGGTG

ATACTCTCCTATGCATATATTCTGAGAACAATCCTGAAGATCCCTTCTGCCCAGCAGAGG

AAGAAGGCTTTTTCCACCTGTTCCTCCCACGTGATAGTTGTCTCTATCTCTTATGGAAGC

TGCATTTTTATGTACTTGAAACCTTCTGCAGAGGAAAGGGTATCTTTAAACAAGGGGATA

GCAGTGCTCAACACTTCAATTGCACCTCTCTTAAATCCTTTTATATATACCCTAAGAAAT

AAACAGGTGAAACAAGCCCTGAAAGATATAATTAAAAAACGTATCTTTATTGCCTTAAAC

AAATAA

>LoafORs2.83P

ATGAGAAACCACACAATAATAACAACATTCATTCTAGTAGGATTGACTGATGACCCTAAC

TGGCAAACAGTAATTTTCCTTTTTCTTTTTCTAACATACGTATTGAGTGTTACTGGAAAT

CTGACCATTATCCTGCTCACTCTATTGGATCCCCACCACAAGACACCCATGTATTTCTTT

CTCTGGAATTTTTCATTCTTAGAAATGTCATTGACATCTGTGTGCATCCCCAGATACCTG

GTCAGCATACTGACTATGGATAAAACGATATACTATGATGCTTGTGCTGTACAAATATTT

TTTGCCATCTTCTTGGGTGCATCAGAGTTTTTTCTGCTGGCTTCCATGTCCTATGACTGC

TATGTGGCCATCTGCAAACCCCTACATTATACAACCGTTATGAGCAGCAGAGTCTGCACC

AAGCTGGTCATTATGTCCCAGGTGGCTGGGTTGTTAACAATCTTTCCTGGGCTTATCATG

GGTCTGAAATTGGGTTTCTGTGATGCCAATATTATTGACCACTTTTACTGTGACTGTGCT

TCTGTCCTGAAACTCTTCTGCACAGTCACAGGGGTCTTCGAAATGTTGGGTTTTATTTCA

GCTATGGTCACACTGCTGATTACACTGGCACTGGTGATACTCTCCTATGCATACATTCTG

AGAACAATCCTGAAGATCCCTTCTGCCCAGCAGAGGAAGAGGGCTTTTTCCACCTGTTCC

TCCCACATAATTGTTGTCTCTACCTCTCATGGCAGCTACATTTTTACGTATATGTTACCT

TCTGCAGAGGAGAGAGTCGCTTTAAACAAGGGGGCAGCAGTAGTCAATCTTTCACTTAAA

CACCTGTTTTAAATCCTTTCATACACA

>LoafORs2.84P

TTTTTATTTTTCATGTATATACTGAGTATAACTGGAAACCTGACACTTATCACCCTTACT

CTCATAGATTCTCACCTCAAAACTCCCATGTATTTCTTTCTTAAGAATTTCTCTCTCTTG

GAAATCTCATTCACAGCAGTTTGTATTCCTAGATTTCTGGTCAGCATTATAACTGGAGAC

AAGACCATTTCTTATAATTCTTGCATGGCCCAGGTGTTTTTCTTCATACTGTTTGGTTCA

ACAGAATTTTTCCTTTTGACGGTTATGTCATATGATAGTTATGTGGCCATCTGTAAGCCA

TTGCATTATACAACAATAATGAACAGCAGAATATGCCTCCAGTTTGTAATTAGCTCTTGG

CTGGCTGGATTTCTTATTAACTTTCTACCTGTGATCATGGGGCTTCAACTGGATTTCTGT

GACTCCAACATCATTGACCACTTCACCTGTGACTATTCTCCTATGTTGCTGATTGCCTGC

ACAGACACCGCATTCCTACAGCTCATGGGATTTGTCATAGCAGTATTTACTCTCATAGTA

ACCCTATCACTAGTGATTCTGTCCTATGCATTCATCCTTAGAACAATTCTGAAAATCCCC

TCTGCTGAGAAAAGGAAAAAGGCTTTTTCCACTTGTTCCTCACACATGTTTGTTGTCTCC

ATTTCTTATGGAAGTTACATTTTCATGTATGTTAAAACCTCAGCAGAGGAAGGTCTGGCT

TTTACCAAGGGCATAGCAGTACTCAATACCTCTGTTGTCCCAATATTAAATCCTTTCCTT

TACTCCCTAAGGAACCAACAGGTAAAACAGGCCTTTAAGAACTTAGTCCAAAGATGCTTC

TCAAATAAATTT

>LoafORs2.85

ATGGAGTTCAGAAGGAATTTAACCATGAGAAATCATACAATGGTGATAACATTTATTCTT

CAAGGTCTGACTGATGATCCAAATTGGCAAATAGTGATTTTCCTTTTTCTATTTCTAACA

TATTTATTGAGTGTCATTGGAAATCTGACCATTATCCTGCTCACTCTACTGGATTCCCAC

CTCAAAACACCTATGTATTTCTTCCTTAGGAATTTTTCATTCTTAGAAATCTCAATGACT

TCAGTCTGTATACCTAGACATCTGTTCAGCATAATGACTATGGATAAAACGATTTCCTAT

GATGCTTGTGTGACACAATTATTTTTTGCCATCTTCTTGGGCGCATCAGAGTTTTTCCTG

TTGGCAGCCATGTCCTATGACCGCTATGTGGCCATCTGCCAACCCCTTCACTATGCAACA

ATCATGAGCAGCAGAGTCTGCACCCGGCTGGTCGTTACCTCCTGGGTGGCTGGGTTGTTA

ACAATCTCTCCTGCGCTCATTATGGGCCTAGGATTGGAGTTCTGTGATGCCAATGTTATT

GACCACTTTTTGTGTGACTACGCTCCTGTCCTGAAACTCTCCTGCACTGACACACAGGTC

ATTGAATTGCTAAGTTTTATCTTAGCAATTTTCACACTGCTGATTACATTTGCTCTGGTG

ATACTCTCCTATGCAAATATTGTAAGAACTATTCTGAAGATCCCTTCTGCCCAGCAGAGG

AAGAAGGCTTTTTCCACCTGCTCCTCGCATATGATTGTTGTCTCTATCTCTTATGGCAGC

TGCATTTTTATGTATATAAAACCTTCTGCAGAGGACAGGGTAGCTTTAAACAAGGGAGTA

GCCGTGCTCAACACTTCAGTTGCCCCTGTCCTAAATCCTTTTATATACACCCTAAGAAAC

AAACAAGCAAAACAAGCCTTGAGGGACATCATTAAAAAATGCATCTTTATTATCTCAAAA

TAG

>LoafORs2.86P

GATTATAGGTACTCTACAGTCCTTCCACACTTCACCTGTGACTCTTCTCCTATGTTGCTG

ATTGCTTGCACAGACACAAAGTTTCTCGAGTTTATGGCATTTTTCTTAGCAGTATTCACA

TTCATGGCAACTTTGGCCTTGGTGATTCTCTCCTACACACTCACCCTCAGAACAATTCTG

AAGATCCCTTCTGCTCAGCAAAGGAAAAAGTCTTTTTCCACTTGTTCTTCGCATATGATT

GTGGTTTCCATTTCCTATGGGAGTTGCATTTTCATGTATGTACAAACGTCAGCAAAAGAA

GGTGTGGTTTTGAGCAAAGGTGTAGCAGTGCTTAATACCTCTGTTGCTCCCATGTTGAAT

CCCTTTATTTACACCTTAAGGAACCAGCAGGTGAAACAGACCATTAAGGACTTA

>LoafORs2.87P

CCCTTATTATACCTTTCTTTTTCAGACATAAAATTCCTAGAGTTAACTGGGTTTTCCCAT

GCTGTGTTTACACTAATGTTCACTTTGGCATTAATAATTCTGTCTTACATATATATCATC

CAAACAATTCTGAGAATTCCTTCTACTAGCCAGAGGACAAAGGCCTTTTCCACATGTTCA

TCCCACATGATTGTCATCTCTATCTCTTATGGCAGCTGGATTTTCATGTATGTTAATCTG

TCAGCAAAAGGCAGAGTGTCTTTGAGCAAGGGAGTACCTCTGCTAAACACCTCAGTAGCT

CCCATGCTGCACCCATTTATTTACAGCCTAAGAAATCAGCAGGTCAAGTGAGCCTTCGTG

GACATGGCAAGGAAGACTGCATTTTTCTCAAGCAAG

>LoafORs2.88

ATGAAAAATTACACAGAAGTAACAGAGTTTATTCTACTAGGATTGACAAATGACCCACGG

GAGCAGGTTGTGCTTTTCGTATTTCTTCTTGTCACCTACATGCTAAGTGTGAGTGGGAAC

CTGATCATTATCACCCTCACCCTTTCAGATCCCCATCTCCAGACTCCCATGTATTTCTTC

CTTCGGAATTTCTCCTTCCTGGAAATATCATTCACGTCTGTTTGCATTCCCAGATTCCTA

GTCACCATTGTAACCGGGGACAGAGCCATCTCCTATAGTGGCTGTGTGGCTCAGCTATTT

TTTGTCATCCTTTTGGGGGTGACAGAGTTTTACCTCCTGGCCGCCATGTCCTATGACCGC

TATGTGGCCATCTGCAAACCTTTGCATTACACCACCATCATGAGCCGCAGAGTCTGTATC

CTGCTCGTTTTTAGCTCTTGGTTTGCGGGATTCCTGATCATCTTTCCACCAATAATCCTG

CTGCTGCAGCTGGATTTCTGTGCCTCCAATGTAATTGATCATTTTATCTGTGACTCTTCT

CCAATTCTGCAGCTTTCTTGCACAAATACTCACTTTCTAGAACTCATGGCTTTTTTTTTA

GCTGTGATAACACTCATGGTCACCTTGACACTAGTTATTCTCTCCTACACGTATATCATC

AGGACAATTCTGAGAATTCCTTCCATGAGTCAAAGGAAAAAAGCCTTTTCCACTTGTTCC

TCCCACATGATCGTTGTCTCCCTCTCTTATGGCAGTTGCGTCTTCATGTACATTAAGCCT

TCTGCAAGGGAAAGGGTGACATTAAGCAAAGGAGTAGCTGTGCTCAATACCTCAGTGGCT

CCCCTCTTGAATCCCTTCATATATACACTAAGGAATCAGCAAGTGAAACAAGCCTTCAAT

ATCATGGTCCAGAGGATGGTCTTTCCTTCAAATAAATGA

>LoafORs2.89

ATGAGAAACCATATAAGGGTGACAACATTTATTCTTGTCAGACTAACAGATGATCCAAAC

TGGCAGATTGTAATTTTCCTTTTTCTATTTCTAACATATTTATTGAGTGTCACTGGAAAT

CTGACCATTATTCTGCTCACAATATTGGATTCCCAACTCAAAACACCCATGTATTTCTTT

CTTAGGCATTTTTTGTTTTTAGAAATGTCATTCACATCTGACTGGATCCCGAGGTACCTG

GTCAGCATTGTGACTCTGGATAACAGGATTTCCTATGATGCTTGTATGACACAATTATTT

TTTGCCATCTTCTTGGGTGCATCAGAGTTCTTCCTGTTGACTGCCATGTCCTATGACCGC

TATGTGGCCATCTGCAAACCCCTTCGCTATGCAACGGTCATGAACAACAGAGTCTGTATC

CAGCTGCTTGTTACCTCTTGGTTAGCTGGGTTGTTAACCATCTCTCCTGGACTTATCATG

GGCTTGAGGTTTGAGTTCTGTGATGCCAACATTATTGACCACTTTGGCTTTGACTATTCT

CCTGTCCTGAAACTCTCCTGCACAGACACACGGTCCATAGAATTGTTAGGTTTTATCACA

GCCACTGTCATAGTGCTGATTACGCTGGCACTGGTGACACTCTCCTATGCATACATTCTG

AGAACAATTCTGAAGATCCCTTCTGCCCAGCAGAGGAAGAAGGCTTTTTCCTCCTGTTCC

TCCCACATGATTATTGTCTCTATCTCTTATGGCAGCTGCATTTTTATGTATATTAAACCT

TCTGCAGAGGAGAGGGTAGCTTTAAACAAGGGGGTAGCAGTGCTCAACACTTCAATTGCA

CCTCTCTTAAATCCTTTCATATATACTCTAAGAAATAAGCAAGTAAAACAAGACCTGAAG

GATGTAATTAGGAGATGTATCTTTATTACATAA

>LoafORs2.90P

CTGAGAAACCATACAACGGTGACAACATTTATTCTAGTGGGACTAACGGATGATCCAAAC

TGGCAAATTGTAATTTTCCTTTTTCTATTTCTAATATATTTATTCAGTGTCACTGGAAAT

CTGACCATTGTCCTGCTCACATTATTGGATTCCCAACTCAAAACACCCATGTATTTCTTC

CTTAGGCATTTTTCATTTTTAGAAATATCATTCACA/GACTGGATCCCTAGGTACCTGAT

CAGCATTGTGACTATGGATAACAGGATTTCCTGTGATGCTTGTATGACACAATTATTTTT

TGCCATCTTCTTGGGTGCATCAGAGTTCTTCCTGTTGACTGCCATGTCCTATGACCGCTA

TGTGGCCATCTGCAAACCCCTTCGCTATGCAACAATTTTGAACAACAGAGTCTGTACCCA

GCTGCTTGTTACCTCTTGGTTAGCTGGGTTGTTAGCAATCTCTCCTGGGCTTATCATGGG

CTTGGGATTGGAATTCTGTGATGCCAGCAATATTGACCACTTTGCCTGTGACTATTCTCC

TGTCCTGAAACTCTCCTGCACGGACACACAGTCCATAGAATTGTTAGGTTTTATTTCAGC

CATTGTCATACTGCTGATTACGCTGGCACTGGTGATACTCTCCTATGCATATATTCTGAG

AACAATTCTGAAGATCCCTTCTGCCCAGCAGAGGAAGAAGGCTTTTTCCACCTGTTCCTC

CCACATGATTATTGTCTCTATCTCTTATGGCAGCTGCATT

>LoafORs2.91

ATGAAAAATCGGTCATCTGTGAAAGAATTCATTCTCCTAGGATTAACAGATGACCCGGAG

CTAAACATTTTAATTTTTCATTTTCTGTTTTTCACATACACACTGAGTATAACTGGAAAC

CTGACAATTATCGCCCTTACTCTGATAGATCCCTGTCTCAAAACTCCCATGTATTTCTTC

CTTAGGAATTTCTCTTTCTTAGAAATCTCATTCACAACAGTTTGCATTCCGAGATTTCTG

GTTAGCATTATAACAGGGAACGTGATCATCTCCTATAATTCTTGTATGGCCCAGATGTTT

TTCTTCATACTCCTTGGTTCAATAGAATTTTTCCTTTTGACGGTTATGTCGTATGATCGT

TATGTGGCCATCTGTAAGCCATTGCATTACACAACAATAATGAACAGCAGAGTCTGCATC

CAGCTAGTGATAAGCTCTTGGCTGGCTGGATTTCTTTTTATCTTTCCACCTGTAATCTTA

GGACTTCAACTGGATTTTTGTGACTCCAACATCATTGACCACTTCACCTGTGACTCCTCT

CCCATGCTGCTGATTTCCTGCACAGACACAGCATTCCTAGAGCTCTTGGGGTTTCTCCTG

GCAGTGGTCACTCTTGTGGTCACCTTAACATTCGTGATTCTTTCCTATGCTTTAATCCTT

AGGACAATTCTGAGAATCCCCTCTGCTGAGCAAAGAAAAAAGGCTTTTTCCACTTGTTCC

TCACACATGATTGTTGTCTCCATCTCGTATGGAAGTTGCATTTTCATGTATGTCAAAACC

TCGGCAAAAGAAGGGGTGGCTTTTACCAAGGGCATAGCAGTGCTCAATACCTCTGTTGCC

CCAATGCTGAATCCTTTCATTTACTCCCTAAGGAACCAACAGGTAAAACAGGCTTTTAAG

AACTTAATCAAAGGATGCTTCTCAAATAAATTTCAATCCTGA

>LoafORs2.92

ATGAAAAATAGAACATCAGTGACAGATTTTATCCTCTTGGGCCTGACAGATAATCCAGAA

GTACAGGTTGTGATTTTCTTCTTTTTATTTCTCACTTATCTACTGAGTGTCACTAGAAAC

CTAATCATCATTACTCTTACCCTGCTGGATTCCCATCTGAAGACCCCCATGTATTTCTTC

CTCAGGAATTTCTCCTTCTTAGAAATTTCATTTACTTCAGTCTGTAATCCTAGATTTTTG

GTCAGCATCATAACTGGGGACAAATCTATTTCTTATAATGCTTGTGCAGTTCAGCTATTT

TTCTTCATCTTCCTCGGTTCAACTGAGTTTTTCCTCCTAGCTTCTATGTCTTATGATTGG

TATGTGGCTATCTGCAAACCTCTACATTATACAACTATCATGAGTAGCAAGATCTGCTAC

CAACTTGTAATCAGCTCTTGGCTGGCTGGTTTCTTGGTTATCTTTCCACCATTGATCATG

GGCCTAGAGCTGGATTTCTGTGACTCCAACATCATTGACCACTTCACCTGTGACTCTGCT

CCGTTACTGCAGATCTCTTGTACAGACACGAGTACTCTAGAGCTCATGAGCTTTGTTTTA

GCTGTGTTTACTCTCTTGTCCACTCCTTCATTAGTAATTCTCTCCTACACTTACATCCTT

AGAACAATTCTGAGACTCCCCTCAGCTCCACAAAGAAAAAAGGCCTTCTCAACCTGTTCC

TCCCATATGATTGTTGTGTCCATCTCTTATGGAAGCTGCATCTTCATGTATGTGAAAACA

TCAGCAACAGAAGGAGCTGCTTTGACGAAAGGAGTAGCTATGCTCAATACCTCTGCAGCT

CCTATGCTTAACCCATTTATTTATACCCTGAGGAACCAGCAAGTGAAACAAGCATTTAAG

GATATTATAAAAAAGACACTTTCCTCAAAAACATTGATCTGA

>LoafORs2.93P

ATGGAATTCAGAAGAAATTTAATCATGAGAAACCATACAATGGTGACAACATTTATTCTT

GTTGGGCCAATCGATGTTCCAAACTGGTAAGTTGTTATTTGCCTTTTTCTGTTTCTAATA

TATTTATTGAGTGTCACTGGAAATTTGACAATTATCCTGCTCACTCTATTGAATCCCCAA

CTCAAAACACTCATGCATTTCTTTCTTAGGCATTTTTCATTTTTAGAAATGTCATTCACA

TCTGACTGGATCCCTAGGTACTTGGTCAGCATTGTGGCTATGGACAATATGATTTCCTAT

GATGCTTGTGTAACACCACTGTTTTTTTGTCATCTTCTT/GTGGCCATCTGTAAACTCCC

TCACGGTGCAACAATAATGAACAACAGAGCCTGTACCCAGCTGGTTGTTACCTCTTGGTT

AGCTGGGCTGTTAACAATCTCTCCTGGGCTTATCATGGGTCTGGGGTTGGAATTTTGTGA

TGCCAATATTATTGACCACCTTGCCTGTGACGATTCTCCTGTCCTGAAACTCTCCTGCAC

GGACACATGGTCCATAGAACTGTTAGACTTTATTTCAGCCATTGTCATACTGGTGATTCC

ACTGGCTCTAGTGATACAGTGGGGTTTTTTTAGTGATACTCTCCTACGCATATATTCTAA

GAGCAACTCGGAGGATCTCTTCTGCCCATTCTGCCGAGCAGAGGAAGAAGGCTTTTTGAC

CTTTTCTTCCCACAGGATCACTGTCTCTATCTCT/TATGGCAGCTGCATTTTTATTTATA

TGAAACTTTCTGAGGAGGAAAGGGTAGCTTTAAACAAGGGGGTAGCCATGCTCAACACTT

CAACTGCACCTCTCTTTAATCCTTTTATATATTCCCTAAGAAATAAGCAAGTAAAACAAG

CCACGAAGGTTATAGTTGAAAAATGTATCATTACTTTAAAAACGTAGTCTAGCTTTTATA

AA

>LoafORs2.94

ATGAGAAACCATACAATGGTAACAACATTTATTCTTGTAGGACTAACAGATGATCCAAAC

TGGCAAATTGTAATTTTCCTTTTTCTATTTCTAACATATTTATTCAGTGTCACTGGAAAT

CTGACCATTGTCCTGCTCACATTATTGGATTCCCAACTCAAAACACCCATGTATTTCTTC

CTTCGGAACTTTTCATTTTTAGAAATGTCATTCACATCTGACTGGATCCCTAGGTACCTG

GTCAGCATTGTGACTATGGATAACATGATTTCCTGTGATGCTTGTATGACACAATTATTT

TTTGCCATCTTCTTGGGTGCATCAGAGTTCTTCCTGTTGACTGCCATGTCCTATGACCGC

TATGTGGCCATCTGCCAACCCCTTCACTATGCAACAATTATGAACAACAGAGTCTGTACC

CAGCTGCTTGTTACCTCTTGGTTAGCTGGGTTGTTAACCATCTCTCCTGGGCTTATCATG

GGCTTGAGGTTGGAGTTCTGTGATGCCAACATTATTGACCACTTTGGCTGTGACTATTCT

CCTGTCCTGAAACTCTCCTGCACACACACACGGTCCATAGAATTGTTAGGTTTTATTTCA

GCCACTGTCATACTGCTGATTACGCTGGCACTGGTGATACTCTCCTATGCGTATATTCTG

AGAACAATTCTGAAGATCCCTTCTGCCCAGCAGAGGAAGAAGGCTTTTTCCACCTGTTCC

TCCCACATGATTGTTGTCTCTATCTCTTATGGCAGCTGCATTTTTATGTATATTAAACCT

TCTGCAGAGGAAAGGGTAGCTTTAAACAAGGGGGTAGCCGTGCTCAACACTTCAATTGCA

CCTCTCTTAAATCCTTTCATATATACTCTAAGAAATAAGAAAGTGAAACAAGCCCTGAAG

GATGTAATTAAAAGAGGTATCTTTATTACATAA

>LoafORs2.95P

ATGAGAAATTACACAGAAGCAACAGAGTTTATTCTACTGGGATTGACAAATGACCCACAG

GGGCAGGTTGTACTTTTTGTATTTCTTCTTGTCACCTACATGCTAAGTGTGAATGGGAAC

CTGATCATTATCACCCTCACCCTTTCAGATCCCCATCTCCAGACTCCCATGTATTTCTTC

CTTCGGAATTTCTCCTTCCTGGAAATATCATTCACGTCTGTTTGCATTCCCAGATTCCTA

GTCACCATTGTAACCGGGGACAGAGCCATCTCCTATAGTGGCTGTGTGGCTCAGCTATTT

TTTGTCATCCTTTTGGGGGTGACANNNNNNNNNNNNNNNNNNNNNNNNNNNNNNNNNNNN

NNNNNNNNNNNNNNNNNNNNNNNNNNNNNNNNNNNNNNNNNNNNNNNNNNNNNNNNNNNN

NNNNCCAATGTAATTGATCATTTTATCTGTGACTCTTCTCCAATTCTGCAGCTTTCTTGC

ACAAATACTCACTTTCTAGAACTCATGGCTTTTTTTTTAGCTGTGGTAACACTCATGGTC

ACCTTGACACTAGTTATTCTCTCCTACACGTATATCATCCAGACTATTCTGAGAATTCCT

TCCATGAGTCAAAGGAAAAAAGCCTTTTCCACTTGTTCCTCCCACATGATCGTTTTCTCC

CTCTCTTATGGCAGCTGCATCTTCATGTACATTAAGCCTTCTGCAAGGGAAAGGGTGACA

TTAAGCAAAGGAGTAGCTGTGCTCAATACCTCAGTGGCTCCCCTCTTGAATCCCTTCATA

TATACACTAAGGAATCAGCAAGTGAAACAAGCCTTCAATATCATGGTCCAGAGGATGGTC

TTTTCTTTGAATAAA

>LoafORs2.96P

ATGAAAAACTACACAGAAGTAACAGAATTTATCCTCTTGGGACTGTCAGATGACCCAGAG

GTTCAGGTTGTGATTTTTGTCTTTCTGTTCATCACCTACATGCTCAGCATTACTGGGAAC

CTGACCATTATCACCCTCACCCTGCTGGATTCCCACCTCCAGACCCCCATGTATTTCTTC

CTCAGGAATTTCTCCTTATTAGAGGTTTCATTCACAACTGTCAGTATACCCAAGTTCCTG

GGCACCATTATTACAGGAGATAAAACCATCTCCTTTAATGATTGTATGGCTTAGTTGTTT

TTCTTCATTCTTTTGGGAGTAACTGAATTTTACCTTTTGGCTGCCATGTCCTATGACCGT

TATGTGGCCATCTGTAAACCCCTGCATTACACGACCATCATGAATGGTAGAGTCTGCACA

CTGCTTGTCTTCTCTTCTTGGCTGGCTTCATTCTTAATCATATTCCCTGCACTCATGCTA

GTCATACAGCTGGGTTACTGTAAGTCCAATGTTATTGATCATTTCACCTGTGGTTATTTT

GCCTTATTACACCTTTCTTGTTGAGACACAAAATTCCTAGAGTTAACGGGGTTTCCCTGT

GCTGTGTTTACTCTACTGTTCACTTTGCCATTAGTAATTCTGTCTTATATATATATA/TA

TATATATATCATCAGAACAATTCTGAAAATTCCTTCTACTAGCCAGAGGACAAAGGCCTT

TTCCACATGTTCATTCCACATGATTGTCATCTCTCTCTCTTATGGCAGCTGCATTTTCAT

GTATATTAATCTGTCAGCAAAAGGCAGGGCGTCTTTGAGCAAGGGAGTAGCTGTGCTAAA

CACCTCAGTAGCTCCCATGATGAACTCATTTTTTTACAGCCTGAGAAATCAGCAGGTCAA

GGGAGCCCTTACGGGCATGGCAAGAAAGATTGCATTTTTCTTAAGCAAG

>LoafORs2.97P

AACTCTACAGCCCTCACAGACTCCAACTGTGACTCTTCTCCTATGTTGCTGATTGCTTGC

ACAGACACAAAATTTCTAGAGTTTATGGCATTTTTCTTAGCAGTATTCATATTCATGGTA

ATTTCGGCCTTGGTGGTTCTCTCCTACACACTCACCCTCAGAACAATTCTGAAGATCCAG

TCTGCTCAGCAAAGGAAAAAGGCCTTTTCCACTCATTCTTCCCATATGATTGTGGTTTCC

AATTCCTACGGGAGTTGCATTTTCATGTATGTAAAAAAAATCAGCAAAAGAAGGTGTGGC

TTTGAGCAAAGGTGTAGTTCCCATGTTGCTCCCATGTTGAATCCCTTTATTTACACCTTA

AGGAACTAGCAGTTTTAACAGGCCCTTAAGGACTTAATCAAG

>LoafORs2.98P

CTTGTGGGGAGCAGTGTCTCTATGTTGGCAGTCATGTCCTATGACCACTATGTGGCCATC

TGCCAACCCCTTCACTATGCAACAATTATGAGCAGCAGAGTCTGCACCCAGCTGGTTGTT

ACCTCCTGTGTGGCTGGGTTGTTAACAATCTCTCCTGCACTTATTATGGGCCTAGGGTTC

GAATTCTGTGATGCCAATATTATTGACCACTTTTTGTGTGACTATTCTTCTATCCTAAAA

CTCTCCTGTGTGGACACATGGGTCATTGAATTGTTAAGTTTTATTTTAGCAATTTTCACT

CTGCTGATTACATTGGATCTTGTGACACTCTCCTATGCAAATATTATGAGAACTATTCTG

AAGATCCCTTCTGCCCAGCAGAGGAAGAAAGTTTTTTCTACCTGTTCCTCCCACATGATT

GTTGTCTGTATCTCTTATGGCAGCTGCATTTTTATGTATATTAAACCTTCTGCAGAGTAA

AGAGTAGTTTTAAACAAGGGGATAGCAGTACTCAACACCTCAGTTGCCCCTGTCTTAAAT

CCTTTTATATATGCCCTAAGAAACAAATAAGTAAAACAAGTCTTGAAGGACATCATTAAA

AAA

>LoafORs2.99

ATGAGAAACTATACAATGGTAACAACATTTATTCTTGTTGGACTAACCGATGATCCAAAC

TGGCAAATTGTGACTTTCTTTTGTCTACTTCTAACATATTTATTGAGTGTCACTGGAAAT

TTGACAATTATCCTGCTCACTGTATTGAATTCCCAACTCAAAACACCCATGTATTTCTTT

CTTAGGCATTTTTCATTTTTAGAAATGTCATTCACATCAGTCTGTATCCCGAGGTACCTG

GTCAGCATTGTGGCTATGGATAGTACAATTTCCTATGATGCTTGTGTAACACAATTGTTT

TTTGTCATCTTCTTGGGTGCATCAGAGTTCTTCCTGTTGACTGCCATGTCCTATGACCGC

TATGTGGCCATCTGCATACCCCTTCACTATGCGACAATAATGGAAAACAGAGTTTGTACC

CAGCTGGTTGTTACCTCTTGGTTGGCTGGGCTGTTAACAATCTCTCCTGGGCTTATCATG

TACTTAAGGTTGGAATTCTGTGATGCTAATATCATTGACCACTTTGCCTGTGACTATTCT

CCTATCCTGAAACTCTCCTGCACAGACACACGGTCCATAGAATTGTTAGGTTTTATTTCA

GCCATTGTCATACTGCTGGTTACATTGGCACTGGTGACACTCTCCTATGCATATATTCTG

AGAACAATTCTGAAGGCTCCTTCTGCCCAGCAGAGGAAGAAGGCTTTTTCCACCTGTTCC

TCCCACATGATTGTTGTCTCTATCTCTTATGGCAGCTGCATTTTTATGTATATGAAACCT

TCTGCAGAGGAGAGGGTCACTTTAAACAAGGGGGTTGCAGTGCTCAACACTTCAATTGCA

CCTCTCTTAAATCCTTTCATATATACCCTAAGGAATAAACAAGTACAACAAGCCCTGAAG

GTTACAGTTCAAAAATGTATCACTACCTTAAAAAAATAG

>LoafORs2.100P

ATGTCTTATGATCACTATGTAACCACCTACAAACCCTTACATTATATGACAATCATGAGC

AACAAAATATGTAAAATAATGGTTATCTGCTCTTGGATGACAACATTTATGATTATCCTC

CCACCTCTTGGCTTAGGTCTTAATCTGGAATTCTGTGACTCTACTGCTATTGATCGTATT

GGCTGTGATGTGTCTCCTATCCTGAAAATCTCGTGCTTAGACACCTGGTTAATTGAGCAG

AAGGTTATAGCCTGTGCTGTGCTCACCTTCATCGTCACTGTTGTATGTGTAGCTCTCTCC

TACATATATGTCATGAAGACAATTCTAAAATTCCCTTTTGTTCAACAAAGGAAAAAGGCC

TTTTCCACCTGATCTGCCCACATGATGGCAGTTTCCATCACCTATGGCAGGTGCATCTTC

ATCTATGTCAATCCTTCTGCAAAAGAAGAGGTAGAGATTAATAAAGGTGTTGCAGTGCTC

ATTTCATCCATATCACCAATGTTGGATCCTCTCATATATGCCCTGAGGAATAAGCAAGTT

AAA

>LoafORs2.101

ATGAGAAATCATACAGCAGTAACAACTTTCATCTTGCTGGGACTTACTGATGACCCACAG

CTGCAAGTTCTGGCTTTCATCTTTTTATTTCTGACGTATATTCTGAGTGTAACCGGAAAC

CTGACCATTATCATTCTTACTCTCACGGATTCCCACCTTAAAACACCTATGTATTTTTTC

CTCCGAAACTTCTCCTTCTTAGAAATCTCTTTCACAACGGTCTGTATTCCCAGATTCCTG

TACAGTATATCAATTGGGGATAATACCATTACTTATAATGCGTGTGCCAGTCAAATATTT

TTTTTTGGACTCTTTGGGGCCACAGAGTTTTTTCTCCTGGCTGCCATGTCCTATGACCGC

TATGTGGCCATCTGCAAACCCCTCCATTATATGACCATCATGAACAGCAGAGTCTGTACT

GTCCTTGTCCTCTGCTGCTGGATCTCTGGGTTGATGATCATCATCACACCACTCGGTATG

GGCCTGCAGCTGGAATTCTGTGACTCCAATGCCATTGATCATTTTGGCTGTGATGCAGCT

CCTCTTTTTAAGATTTCATGCTCAGATACATCGCTTTTAGAACACGTGGTTATAATTTGT

GCAGTATTGACATTCATTATCACACTCATAGGCGTGGTTCTTTCTTACATATATATCATC

AAGACAATACTAAGATTCCCATCTACTCAGCAAAGGAAAAAAGCTTTTTCAACGTGTTCT

TCTCACATGATCGTTGTTTCCATCACCTATGGTAGCTGTATCTTCATCTATATCAAACCT

TCAGCCAAAGAGGATGTGGACATTAATAAAGGGGTATCCGTGCTCACTACATCTGTTGCT

CCTTTGTTAAACCCCTTCATTTATACCTTGAGAAATAAGCAGGTAAAACAATCTTTCAAT

GATATGGTTAAAAAAATTGCATTTATTTTCACAAAAGTAAGAGCACACTGA

>LoafORs2.102

ATGAAGAATCATACAAGGAAGATAGAGTTTATTCTACTGGGGTTGACAGACAATTTTCAG

TTAGAGATTGTCATTTTCTTGTTTCTACTTCTCAGTTACATGTTGAGCGTGATAGGGAAC

TTAGCCATCATTGCCCTCACTCTGCTGGATTCCCATCTCAAGACCCCAATGTATTTCTTC

CTTCGTAATTTCTCCTTCCTGGAAATTTCATTCACAACCACTTGCATCCCCAGATTTCTA

ATTGCCATTGTAACCAAGGAAAAGACCATTTCCTATAATGGTTGTGTAACTCAGATGTTT

TTTTATATCTTTTTGGGGGTTACAGAGTTTTTCCTTCTGGCTGCTATGTCCTATGACCGC

TATGTTGCCATCTGCAAACCCTTGCATTATACATCCGTCATGAGCAGCAGACTTTGTCAC

CAGCTTGTACTCAGCTCTTGGGTAACTGCCTTCTTGGTCATTTTCCCTCCACTCACTTTG

GGTCTTAATCTGGATTTCTGTGCTTCCAATATCATTGACCATTTCATTTGTGACATTTCT

CCTGTTCTGCAACTTTCTTGCTCAGATACACATTTACTAGAATTGATTGCTTTTTTATTA

GCTCTGATGACACTCATTGTCACCTTGTCATTAGTAATCATTTCTTACTCTTATATTTTC

AACACGATTATGAAATTCCCTTCAGCTCAGCAAAAGAAAAAAGCCTTTTCCACCTGCTCT

TCCCACATAATTGTTGTCTCCATCACTTATGGCGGTTGTATCTTCATCTACATAAAGCCA

GCAGCAAATGAAAGAGTTACTTTAAGCAAAGGAGTAGCTGTGCTCAATACTTCAGTTGCC

CCTTTGTTGAACCCAATCGTTTATATTTTGAGGAACCAGCAAGTAAAACAAGGCTTCAGG

GCTGAATTCAAAAAGGTATTTTCCACTTTAGACAAATGA

>LoafORs2.103P

CGGTTACAGATTGTCATTTTCTTGTTTCTACTTCTCATTTACGTGTTGAGCATGATAGGG

AACTTAACCATCATTGCCCTCACTCTCAAGACCCCACTGTATTTCTTCCTTTGTAATTTC

TCTTTCCTGGAAATCTCATTCACAGCTGCTTACATCCCCAGATTCCTGATCAGAACTGTA

ACCAGGGAAAAGACCCATTTCCTATAATGGTTGTATGTCTCAGTTGTTTTTTATGTATTT

TGGGGGATTACAGAGTTTTTCCTTCTGGTTGCTATGGCCTGTGACCGCTACATTGCCATT

ACAAACCCT/AAACCCTTGCATTTTACATCCATCATGAGCACCAGACTTTGTTGCCAGCT

TGTATCAGCTCTTGGGTAACTGCATTCTTGGTCATTTCCCTCCATTGATTTTGTGTCTTA

ACTTGAATTTTTGCCTTCCAATATCACTGACCATTTCATTTGTGACATTTCTCCTATCTT

GCAACTTTCTTGCTCAGACACACATTTACTAGAATTGATTGCTTTTTTAATAGCTCTGAT

GACAGTCATGGTCACATTGGTATTAGTAATCATTTCTTACTCCTATATCATCAAGACAAT

TCTAAAATTCCCTTCAGCTCAGCAAAAGAAAAAAGCCTTTTCCACCTGCTCTTCTCACAT

GATTGTTGTCTCCATCACTTATGGCGGTTGTATCTTCATCTACATAAAGCCAGCAGCAAA

TGAAAGAGTTACTTTAAGCACAGGAGTAGCTGTGCTCAGTACTTCAGTTGCCCCTTTGTT

GAACCCAATCGTTTATACTTTGAGGAATCAGCAA

>LoafORs2.104

ATGAGAAATCACACAGCTATAACAACCTTCATCCTGCTGGGACTGACAGATGACCCACAA

ATGAAAGCTCTGCTTTTTACCTTTTTATTTTTCACCTACATATTGAGTATTACAGGGAAC

CTGACTATTATTACCCTCACATTGGTGAACTCCTACCTTAAAACTCTCATGTACTTTTTT

CTCAGAAATTCCTCCTTCTTAGAAGTCTCATTCGTCACTGTCTTTATTCCTAGATTCCTG

TACAGCGTATCTACTGGGGACAATACTGTTACATACAATGCTTGTGCAAGTCAAATATTT

TTTGTTTTTCTTTTTGGAGCAACAGATTTTTTTCTCCTGGCAGCCATGTCCTATGACTGC

TCTGTGGCCATCTGTAAACCCCTTCATTACATGACCATCATGAGCAACAAGGTCTGTGTC

TTATTAGTTCTCTGCTGTTGGGTAGCTGGCTTGATGATCATTCTCCCTCCCCTTAGCCTG

GGTCTCCAGCTGGAATTCTGTGATTCCAGTGCTATTGATCATTTTAGTTGTGATGCAGGT

CCCCTCCTAAAGATCTCATGCTCAGACACATGGTTGTTAGAGCAGCTGATTATACTTGTG

GCTGTATTTGCACTCATTATCACCCTAGTGTGTGTGTTTCTGTCCTACACATACATCATC

AAGACAATTCTAAGATTTCCTTCTGTCCAGCAAAGAAAAAAAGCCTTTTCTACCTGCTCA

TCCCACATGATTGTGGTTTCCATCACATACGGAAGCTGCATCTTCATCTACATTAAGCCT

TCAGTGAAGGAAGAAGTGGCCATCAATAAAGGAGTTTCAGTGCTCATGACTTCTGTTGCT

CCCTTGTTGAACCCCTTCATCTCTACCCTGAGGAACAAGGAAGTGAAACTGGCTTTCAAT

GCTCTGTAA

>LoafORs2.105

ATGGAATTCAGAAGAAATTTAACTGTGGGAAACCATACGATGGTAACACTTATTCTTGTG

GGACTAACGGATGATCCAAACTGGCAGGTTATAATTTTCCTTTTTCTATTTCTAACATAT

TTTTTGAGTGTCATTGGAAATCTGACCATTATCCTGCTCACTCTTCTGGACTCCCACCTC

AAAACACCCATGTATTTCTTCCTTCGGAATTTTTCCTTCTTAGAAATCTCACTGACGACT

GTCTGTATCCCTAGATACTTATTCAGCATAGTGACTATGGATAAAACGATTTCCTATGAT

GCATGTGCGACGCAATTGTTTTTTGCCATCTTCTTGGGTGCATCAGAGTTTTTCCTGTTG

GCTGCCATGTCCTATGACCGCTATGTGGCCATCTGCCAACCCCTTCACTATGCAACAATC

GTGAGCAGCAGAGTCTGCACCCAGCTGGTTGTTACCTCCTGGGTGGCTGGGCTGTTAACA

ATCTCTCCTGGACTTATCATGGGTCTGGAGTTGGAGTTCTGTGATGCCAACATTATTGAC

CACTTTTTCTGTGACTATTCTCCTGTCCTGAAACTCTCCTGCACAGACACACGGTCCATA

GAATTGTTAGGTTTTATTTCAGCCATTGTCATACTGCTGATTACGCTGGCACTGGTGATA

CTCTCCTATGCATATATTCTGAGAACAATTCTGAAAATCCCTTCTGCCCAGCAGAGGAAG

AAGGCTTTTTCCACCTGTTCCTCCCACATGATTGTTGTCTCTCTCTCTTACGGCAGCTGC

AGTTTTATGTATATGAAACCTTCTGCAGAGGAAAGGGTCGCTTTAAACAAGGGGGTAGCA

ATACTTGCCATTTCAATTGCACCTGTCTTAAATCCTTTTATATATACCCTAAGAAACAAA

CAGGTGAAACAAGCCCTGAAAGACATAATTAAAAAAGGTGTCTTTATTACCTTAAGATAA

>LoafORs2.106

ATGAAAAATCAGTCATCTTTGAAAGAATTCATTCTCCTAGGATTAACAGATGACCCGGAG

CTAAACATTTTAATTTTTCATTTTCTGTTTTTCACATATATACTGAGTATAACTGGAAAC

CTGGCAATTATTACCCTTACTCTGATAGACCCCTGTCTCAAAACTCCCATGTATTTCTTC

CTTAGGAATTTTTCTTTCTTAGAAATCTCATTCACAACAGTTTGTATTCCTAGATTTCTG

GTTAGCATTATAACAGGGAACATGACCATCTCCTATAATTCTTGTATGGCGCAGGTGTTT

TTCTTCGTACTCTTTGGTGCAACAGAATTTTTCCTTTTAACTGTTATGTCGTATGATCGT

TATGTGGCCATCTGTAAGCCGTTGCATTACACAGCAATAATGAACAGCAGAGTCTGCATC

CAGCTGGTGATAAGCTCTTGGCTGGCTGGATTTCCTATTATCTTTCCAGCTGTAATCTTG

GAACTTCAACTGGATTTCTGTGACTCCAACATCATTGATCACTTCACCTGTGACTCCTCT

CCCATGCTGCTGATTTCCTGCACAGACACAGCATTCCTAGAGCTCTTGGGGTTTCTCCTG

GCAGTGGTCACTCTTGTGGTCACCTTAACATTCGTGATTCTTTCCTATGCTTTAATCCTT

AGGACAATTCTGAGAATCCCCTCTGCTGAGCAAAGAAAAAAGGCTTTTTCCACTTGTTCC

TCACACATGATTGTTGTCTCCATTTCGTATGGAAGTTGCATTTTCATGTATGTCAAAACC

TCAGCAAAAGAAGGGGTGGCTTTTACCAAGGGCATAGCAGTGCTCAATACCTCCGTTGCC

CCAATGCTGAATCCTTTCATTTACTCCCTAAGGAACCAACAGGTAAAACAGGCCTTTAAA

AATGTAATCAAAAGATGCTTCACAAATAAATTTCAATCATGA

>LoafORs2.107P

TTTTTTCTGTGGAATTTTTCTTTATAACAGCTTTCCCTGACATCAACTTGTACTCCTACA

TACCTGGTCAGCATAGCCACAAAGACAAAACAGCTACCTATAATGCTTGTGCAGCCCAGT

CAATTTTAATGATTTTATTTGGGGCATAGAAGCTCTTCTCACTAGTGGCAGTGTCTTATG

ACTGCTCTGTGGCCTACTGCAAACCCCTCTATACAATCACCATGAGCAGCGGAGTCTTAT

TCAAGCTGGTGTTTAGCTCTTGGCTGGCTGCATTTCAGGAAATCTTGTCAGGTGCAATTA

TGGGTCTCCAGCCGGACTTCTGTGATGGCAATACCACTGATTATTTTCTATGTGACTATG

GGCCTGTCCTTCACCAATCTTGCGGATACCAGGGTCATAGAATCCTTCTGTTTTATTTTA

GCCTTAGTGACACTTCTTGTTACCTTGATACTGGTGATTTTCTTCTATACACTTATCTCA

AAGACAATGCTGAAGATTCCATCTGAACAGAATAAGAAGAAGGCATTTTCTACCTGTTCC

TCCCACACGATTGCCATCTCCATTTCTTATGGAAGCTGCATCTTCATGTACATTAATCTT

CTCCCTTTAAACAAAAGTGTGATGGTGCTCAGTACCTCCATTGCCTTCCTCTTAAAT

>LoafORs2.108P

ATGAGAAATGAGACATCAATTAGAGAATTCGTTCTTCTGGGACTTACACATGACCCAGAG

TTACAAGTTGTGATGCTCTTCTTTATGTTGTTCACATACTTATTGAGTGTAAGTGGAAAC

ATGACCATCATATCATTGACACTGTCAAATGTTTGTTTGAAGACTCACATGTATTTCTTC

CTCAGGAATTTCTCTTTCTTAGAAATTTCATTCACAACAGTCTGTATTCCTAGATTTCTG

GTCAGCATTGCTACAGGAGACACAACTATTTCCTATAATGCCTGTATGACTCAAGTGTCT

TTTTTT/TTTTTTTTAATCCTTCTGGGTGCAACAGAGTTTTTTCTTCTGGCTGTCATGTC

CTGTGACTGCTACATGGCTATCTGCAAACCTCTACATTATACAACTATCATGAATGACAA

AGTCTGCATCCAGCTTGTAATTGGCTCCTAGCTGGCTGGTTTCCTTGTTATCTTTCCTCC

AGTGATTATGGGCCTCCAACTGGATTTCTGTGATTCCAACATTTTTGACCACTTCATCTG

CTAATCTTCTCCTATGTTTCTGATTGCTTGCACAGACACAAAGTTTCTAGAGTTTATGGC

ATTTTTCTTAGCAGTATTCACTCTCATGGCAACTTTGGCCGTGGTGATTCTCTCCTACAC

ACTCATCCTCAGAACAATTCTGAAGATCCCTTCTGCCCAGCAAATGAAAAAGGCTTTTTC

CACTTGTTCTTCCTATATGATTGTGTTTTCCATTTCCTATAAAAAATGGGAGTTGCATTT

TCATGTATGTACAAACGTCAGCAAAAGAAGGTGTGGCTTTGAGCAAAGGTGTAGCAGTGC

TTAATATCTCTGTTGCTCCCGTGTTGAATCCCTTTATTTATACCTTTTAAGGAACCAGCA

GGTGAAACAGACCCTTAAGGACTTAATCAAG

>LoafORs2.109

ATGAAAAATAGAACATCAGTGACAGATTTCATCCTCTTGGGCCTGACAGATAATCCAGAA

GTACAGGTTGTGATTTTCTTCTTTTTATTTCTCACTTATCTACTGAGTGTCACTGGAAAC

CTAATCATCATTACTCTCACCCTGCTGGATTCCCATCTGAAGACGCCCATGTATTTCTTC

CTCAGGAATTTCTCCTTCTTAGAAATTTCTTTTACTTCGGTCTGTAATCCTAGATTTTTG

GTCAGCATCATAACTGGGGACAAATCTATTTCCTATAATGCTTGTGCAGTTCAGCTATTT

TTCTTCATCTTCCTCGGTTCAACTGAGTTTTTCCTCCTAGCTTTTATGTCTTATGATCGG

TATGTGGCTATCTGCAAACCTCTACATTATACAACTATCATGAGTAGCAAGATCTGCTAC

CAACTTGTAATCAGCTCTTGGCTGGCTGGTTTCTTGGTTATCTTTCCACCATTGATCATG

GGCCTAGAGCTGGATTTCTGTGACTCTAACATCATTGATCACTTCACCTGTGACTCTGCT

CCATTACTGCAGATCTCTTGTACAGACACGAGTACTCTAGAGCTCATGAGCTTTGTTTTA

GCTGTGTTTACTCTCTGTCACTCTTTCCATAGTAATTCTCTCCTACACTACATCCGTAGA

ACAATTCTGAGACTCCCCTCAGCTCACAAAGAAAAAAAGGCCTTCTCAACCTGTTCCTCC

CATATGATTGTTGTGTCCATCTCTTATGGAAGCTGCATCTTCATGTATGTGAAAACATCA

GCAACAGAAGGAGTAGCTTTGACGAAAGGAGTAGCTATGCTCAATACCTCTGCAGCTCCT

ATGCTTAACCCATTTATTTATACCCTGAGGAACCAGCAAGTGAAACAAGCATTTAAGGAT

ATTATAAAAAAGACACTTTCCTCAGAAACATTGATCTGA

>LoafORs2.110P

GAATTCAGAAGAAACTTAACCATGAGAAACCATACAATGGTGACAACATTTATTCTTGTA

GGACTAACAGATGATCCAAACTGGCAAATTGTAATTTTCCTTTTTCTATTTCTAACATAT

TTATTGAGTGTCACTGGAAATCTGACCATTGCCATGCTCACATTATTGGATTCCCACCTC

AAAACACCCATGGATTTCTTTCTTAGGCATTTTTCATTTTTAGAAATGTCATTCACATCT

GACTGGATCCCTAGGTACCTGGTGAGCATTGTGACTATGGATAACAGGATTTCCTATGAT

GCTTGTATGACATAATTATTTTTTGCCATCTTCTTGGGTGCAATCAGAGTTTTT/TCAGA

GTTTTTCCTGTTGACTGCCATGTCCTATGACCGCTATGTGGCCATCTTCAAACCCCTTCA

CTATGCGACGATTATGAACAACAGAGTCTGTACCCAGCTGCTTATTACCTCTTGGTTAGC

TGGGTTGTTAACCATCTCTCCTGGACTTATCATGGCCTTGAGGCTTGAGTTCTGTGATGC

CAACGTTATTGACCACTTTGGCTGTGACTATTCTCCTCTCCTGAAACTCTCCTGCACAGA

CACACGGGTCATAGAATTGTTAAGTTTTATTTTAGCCATTGCCACACTCCTGATTACACT

GGCACTGGTGATACTCTCCTATGCATATATTCTGAGAACAATCCTGAAGATCCCTTCTGC

CCAGCAGAGGAAGAAGGCTTTTTCCACCTGTTCCTCCCACGTGATAGTTGTCTCTATCTC

TTATGGCAGCTGCATTTTTATGTATATGAAACCTTCTGCAGAGGAGAGGGTAGCTTTAAA

CAAGGGGGTAGCCGTACTCAACATTTCAATTGTACCTCTCTTAAATCCTTTCATATAAAA

AAAACTAAGAAATAAGCAGATAAAACAAGCCCTGAAGGAGGTAATTAAGAGATGTATCTT

CATTATATAAAAC

>LoafORs2.111

ATGAGAATTCATACAATGGTGACAACATTTATTCTTCAAGGTCTGACTGATGATCCAAAT

TGGCAAATGGTGATTTTCCTTTTTCTATTTCTAACATATTTATCGAGTGTCATTGGAAAT

CTGACCATTATCCTGCTCACTGTGCTGGATTCCCACCTCAAAACACCCATGTATTTCTTC

CTTCAGAATTTTTCATTCTTAGAAATCTCAGTGATGTCCCTCTGTATACCTAGGTACCTG

TTCAGCATAATGACTATGGATAAAATGATTTCCTATGATGCTTGTGCGACACAATTATTT

TTTGCCATCTTCTTGGGTGCACCAGAGTTTTTCCTGTTGGCTGCCATGTCCTATGACCGC

TATGTGGCCATCTGCCAACCCCTTCACTATGCAACAATCATGAGCAGCAGAGTCTGCACC

CAGCTGGTTGTTACCTCCTGGGTGGCTGGGCTGTTAACAATCTCTCCTGGACTTATCATG

GGTCTGGGGCTGGAGTTCTGTGATGCCAACATTATTGACCGCTTTTTCTGTGACTATTCT

GCTGTCCTGAAACTCTCCTGCACAGACACATGGGTCATAGAATTGTTAAGTTTTATCTTA

GCAATTTTCACACTGCTGATTACATTTGCTCTGGTGGCACTCTCATATGCAAACATTGTA

AGAACAATTCTGAAGATCCCTTCTGCCCAGCAGAGGAAGAAAGCTTTTTCCACCTGTTCC

TCCCACATGATTGTTGTCTCTATCTCTTATGGCAGCTGCATTTTTATGTATATGAAACCT

TCTGCAGAGGAAAGGGTCGCTTTAAACAAGGGGGTAGCCGTGCTCAACACTTCAGTTGCC

CCTCTCCTAAATCCTTTTATATATACCCTAAGAAACAAACAAGTGAAACAAGCCTGA

>LoafORs2.112

ATGAAAAATCGATCATCTGTGAAAGAGTTCATTCTCCTGGGATTAACAGATGACCCAGAG

CTAAACATTTTGATTTTTCTATTTTTATTTTTCACATATGTACTGAGTATAACTGGAAAC

CTGACAATTATCACCCTTACTCTCATAGATTCTCACCTCAAAATTCCCATGTATTTCTTT

CTTAGGAATTTCTCTTTCCTGGAAATCTCATTAACAACAGTTTGTATTCCTAGATTTCTG

GTCAGCATTATAACCGCAGACAAGACCATATCTTATAATTCTTGCATGGCCCAGGTGTTT

TTCTTCATACTCTTTGGTTCAACAGAATTTTTCCTTTTGACGGTTATGTCATATGATTGT

TATGTGGCCATCTGTAAGCCATTGCATTACACAACAATAATAAGCAGCAGAATATGCCTC

CAGTCTGTGATTATCTCTTGGCTGGCTGGATTTCTTATTATCTTTCCACCTGTGATTGTG

GGGCTTCAACTGGATTTCTGTGACTCCAACATCATTGACCACTTCACCTGTGACTATTCT

CCTATGTTGCTGATTGCCTGCACAGACACCACATTCCTACAGCTCATGGGATTTGTCATA

GCAATATTTACTCTCGTACTAACCTTATCACTAGTGATTCTGTCCTATGCATTCATCCTC

AGAACAATTCTGAAAATCCCCTCTGCTGAGAAAAGGAAAAAGGCTTTTTCCACTTGTTCC

TCACACATGTTTGTTGTCTCCATTTCTTATGGAAGTTGCATTTTCATGTATGTTAAAACC

TCAGCAGAGGAAGGTCTGGCTTTTACCAAGGGCATAGCAGTGCTCAATACCTCTGTTGTC

CCAATGCTAAATCCTTTCATTTACTCCCTAAGGAACCAACAGGTAAAACAGGCCTTTAAG

AACTTAGTCCAAAGATGCTTCTCAAATAAATTTTGGTTATAA

>LoafORs2.113

ATGAGAAACCACACAATAATAACAACATTCATTCTGGTAGGACTGACTGATGACCCTAAC

TGGCAAATGGTAATTTTCCTTTTTCTTTTTCTAACATATGTATTGAGTGTCACTGGAAAC

CTGACCATTATCCTGCTCACTCTATTGGATCCCCACCTCAAAACACCCATGTATTTCTTT

CTTTGGAATTTTTCATTCTTAGAAATGTCATTGACATCTGTGTGCATCCCCAGATACCTG

GTCAGCATACTGACTATGGATAAAACAATATACTATGATGCTTGTGCTGTACAAATATTT

TTTGCCATCTTCTTGGGTGCATCAGAGTTTTTTCTGCTGGCTTCCATGTCCTATGACCGC

TATGTGGCCATCTGCAAACCCCTACACTATACAACCATTATGAGCAGCAGAGTCTGCACC

CAGCTGGTCATTACCTCCTGGGTAGCTGGGTTGTTAACAATCTTTCCTGGACTTATCATG

GGTCTGAAATTGGATTTCTGTGATGCCAATATTATTGACCACTTTTACTGTGACTATGCT

CCTGTCTTGAAACTCTCCTGCACAGACACAGGGGTCTTCGAAATGTTGGGTTTTATTTTA

GCCATTCTCATACTACTGATTACGTTGACACTGGTAATACTCTCCTATGCACATATCATA

AGAACAATTCTGAATATCCCCTCTGTCCAGCAGAGGAAGAAGGCTTTTTCCACCTGTTCC

TCCCACATGATTGTTGTCTCTATCTCTTACGGCAGCTGCATTTTTATGTATATTAAACCT

TCTGCAGAGGAGAGGGTAGCTTTAAATAAGGGGATAGCAGTACTCAATCTTTCACTTGCA

CCTGTTTTAAATCCTTTTATATACACCCTAAGAAACAAACAAGTGAAACAAGCCCTGAAA

GATATAATTCAAAAACATAACTTTATTAACTTAAAACAATAG

>LoafORs2.114

ATGGAATTCAAAAGGAATTTAACCATGAGAAACCATACAGCGGTGACATTTGTTCTTGTA

GGACTAACTGATGATGCAAACTGGCAAATTGTGATATTCCTTTTTCTATTTCTAACATAT

TTTTTGAGTGTCACTGGAAATCTGACCATTATCCTGCTCACTTTACTGGATTCCCACCTC

AAAACACCTATGTATTTCTTCCTCAGGCATTTTTCATTTTTAGAAATGTCATTCACATCC

GTCTGCATCCCTAGGTACCTGGTGAGCATTGTGACTCTGGATAACAGGATTTCCTGTGAT

GCTTGTATGACACAATTGTTTTTTGCTATCTTCTTGGGTGCATCAGAGTTTTTCCTGTTG

GCCGCCATGTCCTATGACCGCTATGTGGCCATCTGCAAACCGTTACATTATGTGACAATT

ATGAACAACAGAGTCTGTACCCAGCTGGTCATTACTTCTTGGTTGGCTGGGTTGTTAACA

ATCTCTCCTGGGCTTATCATGGGTCTGGGGTTGGAGTTCTGTGATGCTAATATTATTGAC

CACTTCGCCTGTGACTATTCTCCTGTTCTGAAACTGTCCTGTACAGACACACGGGTCATG

GAATTGTTAGGGTTTATTTTAGCCATTTTCACGCTCATGATTACACTGGCACTCGTGGTG

CTCTCCTACGTAAATATTGTAAGAACAATTCTGAAGATCCCTTCTGCCCAGCGGAGGAAG

AAGGCTTTTTCCACCTGTTCCTCCCACATGATTGTTGTCTCTATCTCTTATGGCAGCTGC

ATTTTTATGTATATTAAACCTTCTGCAGAGGAGAGGGTAGCTTTAAACAAGGGGATAGCA

GTGCTCAACACTTCAATTGCACCTCTCTTAAATCCTTTTGTATATGCCCTAAGAAATAAG

CAAGTGAAACAAGCCCTGAAAGATATAATTAAAAAACGTATCTTTATTGCCTTAAACAAA

TAA

>LoafORs2.115

ATGAAAAACTACACAGAAGTAACAAAGTTTATCCTCTTGGGATTGTCAGATGACCCAAAG

CTTCAGGTTGTGATTTTTGTCTTTCTGTTCATCACCTACATGCTCAGCATCACTGGGAAC

CTGACCGTTATCAGCCTCACCCTGCTGGATTCCCACCTCCAGACCCCCATGTATTTCTTC

CTCAGGAATTTCTCCTTATTAGAAGTTTCATTCACAACTGTCAGTATACCCAGGTTCCTG

GGCACCATTATTACAGGTGATAAAAGCATTTCCTTTGATGATTGTATGGCTCAGTTATTT

TTCTACATTCTCCTGGGAGTGACTGAATTTTACCTTCTAGCTGCCATGTCCTATGACCGT

TATGTGGCCATCTGTAAACCCCTGCATTACACAACCATCATGAATGGTAGAGTCTGCACA

CTGCTTGTCTTCTTCTCTTGGCTGGCTTCATTCTTAATTGTATTCCCTGCACTCATGCTA

GTCATACAGCTGGGTTACTGTAAGTCCAATGTTATCAATCATTTCACCTGTGGTTATTTC

GCCTTATTACACCTTTCTTGTTCAGACACAAAATTCCTAGAGTTAACTGGGTTTTCCTGT

GCTGTGTTTACTCTAATGTTCACTTTGGCATTAATAATTCTGTCTTACATATATATCATC

CGAACAATTTTGAGCATTCCTTCTACTAGCCAGAGGACAAAGGCCTTTTCCACATGCTCA

TCCCACATGATTGTCATCTCCATCTCTTATGGCAGCTGCATTTTCAGGTATATTAATCCG

TCAGCAAAAGACAGAGTGTCTTTGAGCAAGGGAGTAGCTGTGCTAAACACCTCAGTAGCT

CCAATGCTGAACCCATTTATTTACAGCCTTAGAAATGAGCAGGTCAAGCAAGCTTTCATG

GACCTGTTGAGGAAGATTGAATTTTTCTCAAGCAAATGA

>LoafORs2.116

ATGGAATTCAGAAGAAATTTAACCATGAGAAACCATACAAAGGTGAAAACATTTATTCTT

GTAGGACTAACCACTGATCCAAACTGGCAAATTGTAATTTTCCTTTTACTATTTCTAACA

TATTTATTGAGTGTCACTGGAAATCTGACCATTGTCCTGCTCACGCTATTGGATTCCCAA

CTCAAAACACCCATGTATTTCTTCCTTCGGAATTTTTCATTTTTAGAAATGTCATTCACA

TCCGACTGGATCCCCAGGTACCTGCTCAGCATAGTGACTAAGAATAAAACGATTTCCTAT

GATGCTTGTATGACACAATTGTTTTTTGCCATTTTCCTGGGCGCATCAGAGTTTTTCCTG

TTGACTGCCATGTCCTATGATCGCTATGTGGCCATCTGCCAACCCCTTCACTATGTGACG

ATCATGAACAACAGAGTCTGTACCCAGCTGGTTGTTACCTCTTGGTTGGGTGGGTTGTTA

GCAATCTCTCCTGGGCTTATCTTGTGCTTGAGGTTGGAATTCTGTGATGCCAACATTATT

GACCACTTTGGCTGTGACTATTCTCCTGTCCTGAAACTCTCCTGCTCAGACACACGGTCC

ATAGAATTGTTAGGTTTTATTTCAGCCATTGTCATACTGCTGATTACGCTGGCACTGGTG

ATACTCTCCTATGCATATATTCTGAGAACAATTCTGAAGATCCCCTCTGCCCAGCAGAGG

AAGAAGGCTTTTTCCACCTGTTCCTCTCACATGATTGTTGTCTCTATCTCTTATGGCAGC

TGCATTTTTATGTATATGAAACCTTCTGCAGAAGAGAGGGTCGCTTTAAACAAGGGGGTA

GCAGTGCTCAACAATTCAATTGCACCTCTCTTAAATCCTTTCATATATACCCTAAGAAAT

AAGCAAGTAAAACAAGCCCTGAAGGACATGATTAAAAGACGTATATTTAGTACTTAA

>LoafORs2.117

ATGGAATTTAGAAGAAATTTAACCATGCGAAACCATACAATGGTGGCAACGTTTATTCTT

GTAGGATTAACAGATGATCAAAACTGGCAAACTGTGATTTTTGTTTTTTTATTTCTAACA

TATTTATTGAGTGTCACTGTAAATCTGACTATTACTGTGCTCACTCTATTGGATGCCCAA

CTCAAAACACCCATGTATTTCTTCCTTCGGAATTTTTCATTTTTAGAAATGTCTTTTACA

TCCGTCTGCATCCCTAGGTACCTAGTCAGTATTGTGACTATGGATAAAACAATTTCCTAT

GATGCTTGTATGACACAATTGTTTTTTGCCATTTTTCTGGGTGCATCAGAGTTCTTCCTG

TTGACTGCCATGTCTTATGATCGCTATGTGGCCATCTGCCAACCCCTTCACTATGTGACG

ATCATGAACAACAGAGTCTGTACCCAGCTGGTTGTTACCTCTTGGTTGGGTGGGTTGTTC

GCAATCTCTCCTGGGCTTATCTTGTGCTTGAGGTTGGAATTCTGTGATGCCAACATTATT

GACCACTTTGGCTGTGACTATTCTCCTGTCCTGAAACTCTCCTGCACAGACACACGGTCC

ATAGAATTGTTAGGTTTTATTTCAGCCATTGTCATACTGCTGATTACGCTGGCACTGGTG

ATACTCTCCTATGCATATATTCTGAGAACAATTCTGAAGATCCCTTCTGCCCAGCAGAGG

AAGAAGGCTTTTTCCACCTGTTCCTCCCACATGATTGTTGTCTCTATCTCTTATGGCAGC

TGCATTTTTATGTATATGAAACCTTCTGCAGAGGAAAGGGTAGCTTTAAATAAGGGGATA

GCAGTGCTCAACACCTCAATTGCACCTCTCTTAAATCCTTTCATATATACCTTAAGAAAT

AAGCAAGTAAAAGAAGCCCTGAAGGACATAGTTCAAAAATGTATTATTACCTTAAAAAAT

AGCTTTTTTTTTTTAAAGGAAACCAAGGGTCATTGA

>LoafORs2.118P

AGAACCCAGTCAAGGGAGATACAGTTCATTCCCCTGGGACTCACAGATGACCCACAGTTG

CAAATTGTGATGTTTATTTTTCTCTTTCTCAACTACATTTTGAGTGTGATGGGGAACTTA

TCCATCATTCTCCTTACCCTACTTGATCCTCGCCTGAAGACTCCCATGTATTTCTTCCTA

CGAAATTTCTCCTTCTTGGAAATCTTATTGATAACAATCTGTATTCCTAGATTCCTAACA

ACCATTGTGACTAAAAACAAAATCATTTCCTACAATGATTGTGTATCTCAATTATTCTTT

TTTCTTTTCTTAGGAGTTACAGAGTTTTACCTTCTGGCTGCCATGTCGTATGACCGTTAT

GTAGCCATCTGCAAACCCCTTCATTACCCCTTCATTATGAGAAGCAAAGTGAGCTACGAA

CTTGTACTCAGTTCATGGACAGCTGGCTTTCTGATTACTTTTCCACCATTGGTCATGGGA

CTAAAACTGGAATTCTGTGCTTCCAAAGTAATTGATCATTTCATGTGTGACACTTCTCCT

ATCTTGCAGATTTCTTGCACAGACACTCACTTCTTAGAAATGATTTCATTTGTTTCAGTA

GTTGTAACCCTTGTGGTCACACTACTCTTAGTAATTCTTTCCTATACATATATAGTCAAG

ACCATTCTAAAAATCCCCTCTGCTCAGAAAAGAACAAAAGCTTTTTCCACTTGTTCTTCC

CACATGGCTGTAGTCTCCCTTACTTATGGTAGCTGTATCTTCATTTACATGAAGCCATCA

GCAAAAGAAAGGGTGACTTTATCCAAAGGTGTAGCTGTTATCTATACCTCAGTTGCCCCT

TTACTCAATCCCTTCATTTACAGTCTTAGGAACCAGCAAGTGAAACAAGCTTTCAAGGAT

ACACTTAAAAAAGTTTTCATTTTCTTGAAAAATAAGGAAAAA

>LoafORs2.119P

TTTGTCCTCTTGGGGCCATGAGATGACCCAAATCTTCAGTTTGTGATTTTTGTCTTTCTG

TTCATCACCTACATGCTCAGCATCACTGGGAACCTGACCATTATCACCCTCACCCTGCTG

GATTCCCACCTCCAGACCCCCAAATATTTCTTCCTCAGGAGTTTCTCCTTATTAGAAGTT

TCATTCACAACTGTCAGTATACCCAAGTTCCTGGGCACCATTATCACAGGAAACAAAACC

ATTTCCTTTAATGATTGTATGACACAGTTATTTTCCTTCATTTTCCTGGGAGTCACAGAG

TTTAACCTCTTGGCTGCCATGTCCTGTGACTGCTATGTGGCCATCTGTAAACCCCTGCAT

TACACGACCAGCATGAATGGTAGAGTCTGCACGCTGCTTGTCTTCACTTCTTGGCTGGCT

TCATTCTTAATCATATTCCCACTACTTATGCTATTCACACAGCTGGATTACTGTAAGTCC

AATGTTATCGAGCATTTTACCTGTGATTATTTCCCCTTATTATGACTTTCATGTTCAGAC

ACA/CTTTCATATTCAGACACAAAATTCCTAGAGTTAACTGGGCTTTCCTGTGCTGTGTT

TACTCTAATGTTCACTTTGACATTAGTAATTCTGTCTTACATACATACAATCCGAACAAT

TTTGAGAATTCCTTCTACTAGCCAGGGGACAAAGGCCTTTTCCACATGTTCGTCCCACAT

GATTGTCATATCCATCTCTTATGGCAGCTGCATCTTCATGTATATTAACCTGTCAGCAAA

AGGCAGGGTGTCTTTGAGCAAGAGAGTAGCTGTCCTTAACATCTCAGTT

>LoafORs2.120

ATGAGAAACCATACAGCAATAACAGAGTTTGTCCTCTTGGGATTGTCAGATGACCCAAAG

CTTCAGATTGTGATTTTTGTCTTTCTGCTTATCACCTACATGCTCAGCATCACTGGGAAC

CTGACCATTATCACCCTCACTCTGCTGGATTCCCACCTCCAGACCCCCATGTATTTCTTC

CTCAGGAATTTCTCCTTATTAGAAGTTTCATTCACAACTGTCAGTATACCCAGATTCCTG

GGCACCATTATTACAGAAGATAAAACCATTTCCTTTAATAACTGCATTGCTCAGTTATTT

TTTTTAATTCTCTTGGGGGTCACTGAGTTTTACCTCCTGACTGCCATGTCCTATGACCGC

TACGTGGCCATCTGCAAACCCCTGCATTACGTGACTATCATGAATCGCAGAGTCTGCACA

CTGCTTGTCTTCTCTTCATGGCTGGCTTCATTCTTAATTATATTCCCTGTGCTCATGTTG

CTGTTAAAGCTCGATTACTGTAGATCTAACATTATTGACCATTTTACCTGTGACTATTTT

CCCTTGCTGCAACTTTCTTGTTCAGACACAAAATCCCTAGAGATAATGGGTTTTTCCTAT

GCTGTGTTTATTCTAATATTCACATTGGCATTAGTAATTCTGTGTTACATATATATCATC

AGGACAATTTTGAGAATTCCCTCTGCGAGTCAGAGGACAAAGGCTATTTCCACATGTTCT

TCCCACATGATTGTCTTATCCATCTCTTATAGTAGCTGCATTTTTGTGTATGTTAAACCT

TCAGCAGAAGAGAGGGTGGCTTTGAGCAAAGGAGTAGCTGTGCTAAACATCTCAGTAGCT

CCCATGCTGAACCCTTTTATTTATAGCCTAAGGAATCAACAAGTCAAGCAAGCTTTCATG

GACATGGTAAGGAGGACTGTGTTTTTCACAAGCAAATGA

>LoafORs2.121P

CAGTTTGTACTCTTGGGCATAGCAGAAGACCCAAAGCTTCAGGTTGTGATCTTTATCTTT

TTATTTATAGCTTATGTATTAAGTATCACAGGCAACCTGACCATCGTCATCCTCACCTTG

ATAGACTGTCCTCTAAACACTCCTGTGTACTGCTTCCTCCGGAACTTCTCCTTCTTAGAA

ATTACATTCACCACTGTGTCTATCCCCAGATTTCTGGGGGCAATCATTACTAAAGTCAAG

AACATTTCTTACAATAATTATTTAGCTCGATTATTTTTCTTCATCTTCATGGGTGTGTCT

GAATTTTTTCTTCTAACTGCCATGTCTTACGATCATTATGTTGCCATCTGCAAGCCCCTT

CATTACACCACTATCATGAAGAAGAAAATCTGCGCCCTGCTTCTTCTTTGTTCATGGCTG

AGAGGATTCCTGACCATTTTCCCACCACTCATGCTTATCCTCCAGTTAGATTTCTGTTCT

TCCAGTGTCATTGACATTGTGACTACTCCCCCATCTTACAACTCTCATGCACGGATACCT

GGCTTTTAGAGATGATTGGCTGTTAACTTTCCTTTTGTTCCTTTGCCATTCACATTGGCG

TTAGTGATTCTCTCCTACTTGTGCACCGTTATCACCGTTCTGAGAACCCCTTCTGCCAGT

CAGAGGAAAGAGGCTTTCTCCACTTGTTCTTCTCACATGATCGTCATTTCCATCTCT

>LoafORs2.122P

ATGAAGAACCAGTCAAGGGAGATCGAGTATATTCTCTTGGGATTGATGGATGACCCACAG

TTGCAAATTGTGATTTTTATATTTCTCTTACTCAACTACATTTTGAGTATGATGGGGAAA

TTATTCATCATCCTCCTCAACTTGCTGAATCCTCACCTCAAGACTTCAATGTAATTCTTC

CTCTGAAATTTCCCATTGGCAATCTTGTTGACAACCACCTGTATTCCTAGATTCCTAACA

ACCATTGTGACTAAAAACAAAATCGTTTCCTACAATAATTGTGCATCTCAATTATTCTTT

TTTCTTTTATTAGGAGTTACAGAGTTTTACCTTCTGGCTGCCATGTCTTATGACCATTAT

GTAGCCATCTGCAAATCCCTGCATTACCCCACCATTATGAGAAACAAAGTATGCTACCAA

CTTGTACTCAGTTCATGGGCAGCTGGTTTTCTGAATATCTTTCCACCATAGGTCTTGGGG

CTTAAATTAGAATTCTGTGCTTCCAAAGTAATTGGTCATTTCCTATGTGACACTTCTCCA

CTCCTGCAGATTTCTTGCACAAACACCAGCTTCCTAGAATTGGCTTCATTTCTTTCAGCA

GGAATAATTCTTGTGGCCACATTGCTGTTAGTGATTTTTTCCCTATACATATATAATCAA

GGTCATTCTAAAAATCCCCTCTGCTCAGAAAAGAACAAAAACTTTTTTCACTTGTTCTTT

CTACATGATTGTAGTCTCCCTTACTTAAGGTAGCTGTATCTTCATTTACATGAACCATCA

GCAAAATAAAGGGTGACTTTTTTTTTTAAAGGTGTAGCTGTTATCTATACCTCAGTTGCC

CCTGCATTAAACCCCTTTATTTACATTCTAAGGAACCCTGAA

>LoafORs2.123

ATGAAGAACCAGTCAAGGGAAATAGAGTTCATTCTCTTGGGACTGACAGATGACCCACAG

TTACAAATTGTGATTTTTATATTTCTCTTTCTCAATTACATTTTGAGTGTGATGGGGAAC

TTATCCATCATTCTCCTCACCTTGCTGGACCCTCGCCTCAAGACTCCAATGTATTTCTTC

CTCCAAAATTTCTCCTTCTTGGAAATCTCATTGACAACAATCTGCATTCCTAGATTCCTG

ACAACCATTGTGACTAAAAACAAAATCATTTCCTACAGTGGTTGTGCATCTCAATTATTC

TTTTTCCTTTTAGTAGCAATTACAGAGTTTTACCTTCTGGCTGCCATGTCTTATGACCGC

TATGTAGCCATCTGTAAACCCCTTCATTGCCCCATCATTATGAGAAGCCAAGTGTGCTAC

CAACTTGTACTCTGTTCATGGGCAGCTGGCTTTCTGAATACCTTCCCACCATTGCTTATG

GGACTGAAACTGGAATTCTGTGCTTCCAAAGTAATTAATCATTTCATGTGTGACACTTCT

CCAATCTTGCAGATTTCTTGCACAGACACTCACTTCCTAGAATTGATTTCATTTGTTTCA

TCAGCTATAATACTTGTGGTCACATTGCTGTTAGTGATTTTTTCCTATACATATATAATC

AAGATCATTCTAAAAATCCCCTCTGCTCAGAAAAGAACAAAAGCATTTTCCACTTGTTCT

GCCAACATGACTGTAGTCTCCCTTACTTATGGTAGCTGTATCTTCATTTACATGAAACCA

TCAGCAAAAGAAAGGGTGTCTTTATCCAAAGGTGTAGCTGTTATCTATACCTCAGTTGCC

CCTTTACTCAATCCCTTCATTTACAGTTTAAAGAATCAGCAAGTGAAACAAGCTTCCAAA

GATACACTCAGAAAGATTTTCATTTTTTTCCAAAAAATACATAAAAGATTTAAATCTTGA

>LoafORs2.124P

ATGAAGAACCAATCACTGGAAATAAAGTTCATTCTCCTGGGACTGACAGATGATCCACAA

TTACAAATTGTGATTTTTTTTTCTTTCTCTTTCTCAACTATGCGTTTAATGCTATGGGGA

ACTTGATTATTGCCCTCCTTACCCTGTTGGATGAAAGTCTCAAGACTCCAATGTATTCTT

TTCTCCAAAATTTCTCCTGTTCACAACAGCGTGCATTCCCAGATTCCTAATAACCATTGT

GACTAAAGACAAAACCCTTTCTTATAATGATTGTGTAGCTCAATTATTTTTCATCTTTTT

ACTGGGAGTTACAGAATTTACCTTCTGGCTGCCATGTCCTATGACTGCTACGTTGCCATC

TGCAAGCTGCTGCATTATCCCATCATCATGAGCAGCAGAGTGTGCTACCAACTTGTGCTC

AGTTCTTGGGTAATTGGATTCCTAATCATCTTTCCCCCTTTGATCATGGGTCTCAAGCTG

GATTTCTGTGTTTCCAAAATAATTGATCTTTTTAGTTGTGAAACTTCTATCCTGCAGATA

TCCTGCACAGATACATGTGTCCTAGAATTGATGTCTTTTGTCTTAGTTGTGATGACACTT

GTAGTCACCTTGGTGTTCGTGATTCTGTCTTACACTTACATCATTAGGACCATTCTGAAA

TTCCCCTCTGCACAGCAA/AGAGCTTTTTCCACCTGTACTTCCCACATGATTGTTGTCTC

CATGACTTATGGTAGCTCTACCTTTATGTATATAAAACTATCTGCAAAAGAAAGACTGAC

TGTATCCAAAGGCATAGCTTTGCTCTATACCTCAGTTGCCCCTTTACTGAATTCCTTTAT

TTACACTCTAATGAACCAGCAGGTGAAAGAAGTCTGCCGGGATATATTACAAAAGATTTT

GTGTTTTTCAAAAAAG

>LoafORs2.125

ATGGAATTCAGAAGAAATTTAACTGTGAGAAACCATACAATGGTGACAACATTTATTCTT

GTGGGACTAACGGATGATCCGAACTGGCAAGTTATAATTTTCCTTTTTCTATTTCTAACA

TATTTTTTGAGTGTCACTGGAAATCTGACCATTATCCTGCTCACTCTTCTGGACTCCCAC

CTCAAAACACCCATGTATTTCTTCCTTCGGAATTTTTCCTTCTTAGAAATCTCACTGACG

ACTGTCTGTATCCCTAGATACTTATTCAGCATAATGACTATGGATAAAATGATTTCCTAT

GATGCATGTGTGACGCAATTATTTTTTGCCATCTTCTTGGGTGCATCAGAGTTTTTCCTG

TTGGCAGCCATGTCCTATGACCGCTATGTGGCCATCTGCCAACCCCTTCACTATGCAACA

ATCATGAGCAGCAAAGTCTGCACCCGGCTGGTCGTTACCTCCTGGGTGGCTGGGCTGTTA

ACAATCTCTCCTGGACTCATTATGGGCCTAGGGTTGGAGTTCTGTGATGCCAATATTATT

GATCATTTTTGCTGTGACTATTCTCCTGTCCTGAAACTCTCCTGCACAGACACATGGTCC

ATAGAATTGTTAAGTTTTATTTTAGCCATTGTCATACTGCTGATTACACTGGCACTGGTG

ACACTCTCCTATGCATGTATTCTGAGAACAATCCTGAAGATCCCTTCTGCCCAGCAGAGG

AAGAAGGCTTTTTCCACCTGTTCCTCCCACATGATTGTTGTCTCTCTCTCTTACGGCAGC

TGTATTTTTATGTACATGAAACCTTCTGCAGAGGAGAGGGTTGCTTTAAACAAGGCAATC

GCAGTATTCACCATTTCAGTTGCACCTGTCTTAAATCCTTTTGTATATGCCCTAAGAAAC

AAACAGGTGAAACAAGCCCTGACAGATATAATTAAAAAAGGTATCCTTATTACCCTTTTA

TAA

>LoafORs2.126P

GTATTTAGTTTTTTTAGTACCCTGGCTATCATTACCCCAACTCTCCTTCATTCACACATT

AAAACACCTATGTATTTTTTTCTGTGGAATTTTTCCTTCTAAGAGCTTTCAGTGACATCA

ACTTGTACTCCTACATACCTGGTCAGCATAGCCACAAAGACAAAACAGTTACCTATAATG

CTTGTGCAGCCCAGTTAATTTTAATGATTTTATTTGGGTCATCAGAGTTCTCACTAGCAC

TAATATCTTATGACCGCTATGTGGCCATCTGCAAACCCCCATCAGAGAGCAGTAGAGTCT

TATTCAAGCTGGTGTTTAGCTCTTGGCTGGCTGCATTTCAGGAAGTCTTGTCAGGTGCCA

TTATGGGTCTCCAGCTGGACTTCTGTGATGGCAATACCACTGATTATTTTCTATGTGACT

ATGGGCCTGTCCTTCAACAATTTTGCAGATACCAGGGTCATAGAATCCTTCTCTTTTATT

TTAGTCTTAGTGACACTTCTTGTTACCTTGGTACTAGTGATTTTCCCCTACACACTTATT

TCAAAGACAATTTTGAAAATTCCTTCTGCACATATTAAGAAGGCATTTTCTACCTGTTCC

TCCCAGACGATTGCCATCTCCATTTCTTATGGAAGCTGCATTTTCATGTACATTAATCTT

TCTGCACAAGAAAGGGTGGCTTTAAACAAAGGTGTGATGGTGTTCAATACCTCAATTGCC

TCCCTCTTAAAT

>LoafORs2.127

ATGAGAAACCATCCAATGGTGACAACATTTATTGTTGTTGGACTAACTGATGACCCAAAC

TGGCAAATTGTAATTTTCCTTTTTCTATTTCTAACATATTTATTGAGTGTCACTGGAAAT

TTGGCAATTATCCTGCTCACTCTACTGAATTCCCAACTCAGAACACTCAAGTATTGCTTT

CTTAGGCATTTTTCACTTTTAGAAATGTCATTCACATCTGTCCGTATCCCTAGGTACCTG

GTCAGCATTGTGACTACGGATAATATGATTTCCTATGGTTCTTGTGTAACACAATTGCTT

TTTGTCATCTTCTTCGGTGCATCAGAGTTCTTCCTGTTGACTGCCATGTGCTATGACTGC

TATGTGGCCATCTGCAAACCCCTTCACTATGCAACGGTTGTGAACAACAGAGTCTGTGCC

CAGCTGGTTGTTACCTCTTGGTTAGCTGGGTTGTTAACCATCTCTCCTGGACTTATCGTG

TGCTTGGGGTTGGAATTCTGTGATACTAATATTATTAACCACTTTGGCTGTGACTATTCT

CCTGTTCTGAAACTCTCCTGCACAGACACGTGTTCCATAGAATTGTTAGGTTTTATTTCA

GCCATTGTCATACTGCTGATAACACTTGCACTGGTGATGTTCTCCTGTGCATATATTCTG

AGAAAAATTCTGAGGATCCCTTCTGCACAGCAAAGGAAGAATGCTTTTTCCACCTGTTCC

TCCCACATGATTGTTGTCTCTATCACTTATGGCAGCTGCATTTTTAGGTATATTAAACCT

TCTGCAGAGGAAAGTGTCGCTTTAAACAAGGGGGTAGCCGTGCTCAACACTTCAATTGCA

CCTGTCTTAAATCCTTTTATATATCCCCTAAGAAATAAGCAAGTAAAACAAGCCCTGAAG

GTTATAGTTCAAAAATGTATCATTACCTTAAAAAAACTTTAG

>LoafORs2.128P

ATGGAATTCAGAAGAAACTTAACCATGAGAAACCATACAATGGTGACAACATTTATTCTT

GTAGGACTAACAGATGATCCAAACTGGCAAATTGTAATTTTCCTTTTTGGAATATATTTA

TTCAGTGTCACTGGAAATCTGACCATTATTCTGCTCACATTATTGGATTCCTAACTCAAA

ACACCCATGTATTTCTTCCTTAGGCATTTTTCATTTTTAGAAATGTCATTCATATCTGAC

TGGATCCCTAGGTACCTGGTCAGCATTGTGACTGTGGATAACATGATGTCCTATGAAGCT

TGTATCGCACAATTATTTTTTGCCATCTTCTTGGGTGCATCAGAGTTCTTCCTGTTGAGT

GCCATGTCCTATGACTGCTATGTGGCCATCTGCAAACCCCTTCGCTATGCAACGATCATG

AACAACAGAGTCTGTACCCAGCTGGTTGTTACCTCTTGGTTAGCGGGGTTGTTAACCATC

TCTCCAGGACTTATCTTGTGCTTGTGATTGGAATTCTGTGATGCCAACATTATTGACCAC

TTTGCCTGTGACTATTCTCCTGTCCTGAAACTCTCCTGCACAGACACACAGTCCATAGAA

TTGTTAGGTTTTATCACAGCCTTTGTCATACGGCTGATTACGCTGGCATTGTTAACACTC

TCTTATGCATATATTCTGAGAACAATTCTGAAGATCCCTTCTGCCCAGCAGAGGAAGAAG

GCTTTTTCCACCTGTTCCTCCCACATGATAGTTGTCTCTATCTCTTATGGCAGCTGCATT

TTTATGTATATGAAACCTTCTACAGAGGAGAGGGTCGCTTTAAACAAGGGGGTAGCAGTG

CTCAACACTTCAATTTCACCTCTCTTAAATCCTTTCATATATACCCTAAGAAATAAGCAA

GTAAAATAAGCCCTGAAGGATGTAATTAAAAGATGTATCTTTATTACA

>LoafORs2.129

ATGAGAAATCAAACAGCACTAACAACCTTCATCTTGCTGGGACTGACAGATGATCCTCAG

CTGCAAATTCTGATCTTTATCTTTCTATTTCTTTCCTATATGTTAAGTGTAACTGGAAAC

CTAACCATCATCATCCTCACTCTGGTGGATTCTCACCTTAAAACACCAATGTATCTTTTC

CTTCAAAATTTCTCCTTCTTAGAAATTTCATTCACAACTGCTTGTGTTCCCAGATTCTTG

TATAGCATATCTTCTGGGGACAGGTCCATCACCTATGGTGCTTGTGCCAGTCAACTCTTA

TTTATAGACCTCTTTGCAGTAACAGAATTCTTTCTCCTGGCCACCATGTCCTATGATCGC

TATGTGGCCATCTGCAAACCACTGCATTACACAACCATCATGAGCAACAGAGTATGCAAG

AACTTCATCCTCTTTTGTTGGGCAGCAGCACTGGTGATCATTCTTCCACCAATTAGTTTG

GGTTTGGGCCTGGAGTTCTGTGATTCTAACGTCATTGATCATTTTTGCTGTGATGCATCT

CCTATCCTGAAGATCTCTTGCTCAGACACATGGCTGATAGAACAGATGGTTATCGCGTGT

GCTGTGTTGACATTCATCATCACCCTCATGTGTGTAGTTCTTTCCTACATCTATATCATC

AGGACAATCCTAAGGTTCCCCTCTGCCCAGCGAAAGAAAAAGGCATTCTCCACTTGTTCT

TCCCACATGATTGTTGTTTCCATTACTTATGGTAGCTGCATCTTCATTTATGTCAAACCT

ACGGCCAAGGACGAGGTGGCAATTAATAAAGGCATTTCACTCCTTATTACTTCTATTTCA

CCAATGTTGAATCCCTTTATTTACACACTGAGAAACAAGCAAGTGAAGCAAGCTTTCAAT

GACTCAATGAAAAAAAAATGCACTCTTCTCAAAGATGTGAAGGTAAAAGGAAGGTTGATG

AATCCAATTAAAAGAGAGGATGAATGGTCACAAACCTGA

>LoafORs2.130

ATGAGAAACCACACAGCAATAACGACATTCATCCTTCTGGGACTGACGGAAGATCCTCAG

CTGCAGGTTTTGCTTTTTATTTTCCTACTTACCACCTACGTGTTGAGTGTAACTGGAAAT

CTGACCATCATCACCCTCACCTTGGTGGATCCCCACCTTAAAACACCCATGTATTTTTTC

CTCCAAAATTTCTCTTTCCTAGAAATCTCATTTACAACTGCCTGTGTTCCAAGATTCCTG

TACAGTATATCAACTGGAGACAGAACAGTTACCTACAACGCATGTGCCATTCAACTATTT

TTTACAGATCTCTTTGGGGTGACTGAATTTTTCCTTTTGGCCACCATGTCTTATGATCGC

TATGTGGCCATCTGTAAACCCTTGCATTATATGACAATCATGAGCAAAAAAGTATGTAAA

ACCATGGTTATCTGCTGTTGGATGGCAGCATTTATGATCATCCTCCCACCACTTAGCTTA

GGTTTTAATCTGGAATTCTGTGACTCTAATGTCATTGATCATTTTGGCTGTGATGCATCT

CCTCTCCTGAAAATCTCATGCTCAGACACGTGGCTAATTGAGCAGATGGTTATAGCCTGT

GCTGTGCTGACCCTCATCATTACCCTGGTATGTGTAGTTCTCTCCTACATATATATCATG

AAGACAATTCTAAAATTCCCTGCTGTTCAACAAAGGAAAAAGGCCTTTTCCACTTGTTCT

TCCCACATGATTGTAGTTTCCATCACCTATGGCAGCTGCATCTTCATCTATGTCAATCCT

TCTGCAAAAGAAGAGGTAGAAATTAATAAAGGTGTGTCAGTACTCATTTCATCCATATCA

CCAATGTTGAATCCTTTCATATATACCCTGAGGAATAAGCAAGTTAAACAATCCTTTAAT

GACTCACTCAAAAAAATTGCATCCCTCTCAAAGAAGTAA

>LoafORs2.131P

ATGTCTTATGATAGCTATGTGACCATCTAAAAACCCTTGCACTGTATGTCAATCACGAGT

AACAAAATATGTAGAACAATGGTTATCTGCTGTTGGATGAGAGCATTTATGATTATCCTC

CCACCTCTTGGCTTACATTTAAATCTGGAATTCTGTGACTCTACTGCCATTGATCATATT

AGCTGTGAAGCATCTCCTATCCTGAAAATTTCATGCTTAGACACATGGTTAATTGAGCAG

ATGGTTATAGCCTGTGCTGTGCTGACCCTCATCATCACCGTTGTATGTGTAGCTCTCTCC

TACATATATGTCATGAAGACAATTCTAAAATTCCCTTCTGTTCAACAAAGGAAAAAGGCC

TTTTCCACCTGATCTGCCCACATGATCATAGTTTCCATCACCTATGGCAGCTGCATCTTC

ATCTATGTCAATCCTTCTGCAAAAAAAAGTAGAAATTAATAAAGATGTGTCAGTACTCAT

TTCATCCATATCACCAATGTTGAATCCTTTCATATATACTCT

>LoafORs2.132

ATGAGAAATCATACAGCAGTAACAACTTTCATCTTGCTGGGACTTACTGATGACCCACAG

CTGCAAGTTCTGGTTTTCATCTTTTTATTTCCGACCTATATTCTGAGTGTAAACAGAAAC

CTGACCATTATCATTCTTACTCTCATGGATTCCCACCTTAAAACACCTATGTATTTTTTC

CTTCGAAACTTCTCCTTTTTAGAAATCTCATTCACAACAGTCTGTATTCCCAGATTCCTG

TACAGTATATCAACTAGGGATAATACAATTACTTATGATGCTTGTGCAAGTCAAATATTT

TTTATTGGACTCTTTGGGGCCACAGAGTTTTTTCTCCTGGCTGCCATGTCCTATGACCGC

TATGTGGCCAACTGCAAGCCCCTCCATTATATGACCATCATGAACAGCAGAGTCTGTACC

ATCCTCGTCCTCTGCTGCTGGATCTCTGGGTTGATGATCATCATCACACCGCTCGGTATG

GGCCTGCAGCTGGAATTCTGTGACTCCAATGCCATTGATCATTTTGGCTGTGATGCAGCT

CCTCTTTTTAAGATTTCATGCTCAGACACATGGTTCATAGAACAGGTAGTTATAATTTGT

GCAGTGTTGACATTCATTATCACACTCATAGGCGTGGTTCTTTCTTACATGTATATCATC

AAGACAATACTAAGATTCCCGTCTACTCAGCAAAGGAAAAAAGCTTTTTCAACGTGTTTT

TCTCACATGATTGTTGTTTCCATCACCTATGGTAGCTGTATCTTCATCTATATCAAACCT

TCAGCCAAAGAGGATGTGGACATTAATAAAGGGGTATCCATGCTCACTACATCTGTTGCT

CCTTTGTTAAACCCCTTCATTTATACCTTGAGAAATAAGCAGGTAAAACAATCTTTCAAT

GATATGATTTAA

>LoafORs2.133

ATGAAGAATCATACAAAGAACATAGAGTTTATTCCACTGAGACTGACAGGTAATTCTCAG

TTACAGATTGTCATTTTCTTGTTTCTACTTCTCAGTTACATGTTGAGCATGATAAGGAAC

TTAACTACCATTGCCCTCACTCTGCTGGATTCCCATCTCAAGACCCCAATGTATTTCTTC

CTTTGTCCTTTCCCTTTCCTGGAAATCTCATTCACAACTGTTTTCATCCTCAGATTCCTC

ATCACAACTGTAACCAGGGAAAAGACCATTTCCTATAATGGTCGTATGTCTCAGTTGTTT

TTTTATATATTTTGGGGGGTTACAGAGTCTTTCCTTCTGGCTGCTGTGTCCTATGACCGC

TACGTTGCCTACTGCAAACCCTTGCATTGTACATCCGTCATGAGCAGCGGACTTTGTCAC

CAGCTTGCACTCAGCCCTTGGGTAACTGCATTCTTGGTCATTTTCCCGCCACTGTTTTTG

TGTCTTCACTTGGATTGTTGTGCTTCCAATATCATTGACCCTTTCATTTGTGACATTTCT

CCTAACTTCCAACTTTCTTGCTCAGACACACATTTACTAGAATCCATTGCTTTTTTAATA

GCTCTGATTAAAATCATTGTCACATTGGTATTAGTAATCATTTTTTACTCCTATATCATG

AAGAAAATTGTAAAATTCTCTTCAGCTCAGCAAAAGAAAAAAGCCTTTTCCACCTGCTCT

TCTCACATGATTGTTGTCTCCATCACTTATGGCGGTTGTATCTTCATCTACATAAAGCCA

GCAGCAAATGAAAGAGTTACTTTAAGCAAAGGAGTAGCTGTGCTCAGTACTTCAGTTGCC

CCTTTGTTGAACCCATTCATTTATACTTTGAGGAACCAGCAAGTAAAACAAGGCTATAAT

TGTCCTATTGAATGTGCAGTATACAACCTTTTTTTTTTTTTTTCACTTTGGTACTGA

>LoafORs2.134

ATGAGAAATCACACTGCTATAACAACCTTCATCCTGCTGGGACTGACAGATGACCCACAA

ATGAAAGCTCTGCTTTTTACCTTTCTATTTTTCACCTATATATTGAGTGTTACAGGGAAC

CTGACTATTATTACCCTCACATTGGTGGACTCCCACCTTAAAACTCCTATGTACTTTTTT

CTCAGAAATTTCTCCTTCTTAGAAGTCTCATTCACCACTGTCTGTATTCCTAGATTCTTG

TACAGCATATCAACTGGGGACAATACTGTTACATACAATGCTTGTGCAAGTCAAATATTT

TTTGTTTTTCTTTTTGGAGCAACAGAATTTTTTCTCCTGGCAGCCATGTCCTATGACCGC

TATGTGGCCATCTGTAAACCCCTTCATTACATGACCATCATGAGCAACAAGGTCTGTGTC

TTATTAGTTCTCTGCTGTTGGGTAGCTGGCTTGATGATCATTCTCCCTCCCCTGAGCCTG

GGTCTCCAGCTGGAATTCTGTGATTCCAGTGCTATTGATCATTTTAGTTGTGATGCAGGT

CCCCTCCTAAAGATCTCATGCTCAGACACATGGTTGTTAGAGCAGCTGATTATACTTGTG

GCTGTATTTGCACTCATTATCACCCTAGTGTGTGTGTTTCTGTCCTACACATACGTCATC

AAGACAATTCTAAGATTTCCTTCCGTCCAGCAAAGAAAAAAGGCCTTTTCTACCTGCTCA

TCCCACATGATTGTGGTTTCCATCACTTATGGAAGCTGCATCTTCATCTACATCAAGCCT

TCAGCAAAGGAAGAAGTGGCTATCAATAAAGGAGTTTCAGTGCTCACGACTTCTGTTGCT

CCCTTGTTGAACCCCTTCATCTACACCCTGAGGAACAACCAAGTGAAACTAGCTTTCAAT

GACTCTGTAAAGAAGATTGCATTTCTGTCAAAGAAGTAA

>LoafORs2.135

ATGGAATTTAGAAGGAATTTAACCATGAAAAACCTTACAATGGTGACAACATTTATTTTT

GTGGGACTAACGGATGACCCAAACTGGCAAATTGTAATTTTCCTTTTTCTGTTTCTAACA

TATTTATTGAGTATCACTGGAAATCTGACTATTATCCTGCTCACTCTTCTGGACTCCCAC

CTCAAAACACCCATGTATTTCTTCCTTCGGAATTTTTCATTCTTAGAAATCTCATTGACG

ACTGTCTGTATTCCTAGATACTTGTTCAGCATAATGACTATGGATAAAACGATTTCCTAT

GATGCTTGTGCGACGCAATTATTTTTTGCCATCTTCTTGGGTGCATCAGAGTTTTTCCTG

TTGGCTGCCATGTCTTATGACCGCTATGTGGCCATCTGCCAACCCCTTCACTATGCAACA

ACCATGAGCAGCAGAGTCTGCACCCAGCTGGTTGTCACCTCCTGGTCGACTGGGTTGTTA

ACAATCTCTCCTGGGCTTATCATGGGTCTGGGGCTGGAGTTCTGTGATGCCAACATTATT

GACCACTTTTTCTGTGACTATTCTCCTCTCCTGAAACTCTCCTGCACAGACACATGGGTC

ATAGAATTGTTAAGTTTTATTTTAGCCATTGCCACACTCCTGATAACTTTGGCACTGGTG

ATACTCTCCTATGCATGTATCATAAGAACGATTCTGAAGATCCCTTCTGCCCAGCAGAGG

AAGAAAGCTTTTTCCACCTGTTCCTCCCACATGATTGTTGTCTCTCTCTTTTATGGCAGC

TGCATTTTTACATATATTAAGCCTTCTGCAGAGGAAAGGGTAGCTTTCAACAAGGGGGTA

GCAATACTCACCATTTCAATTGTACCTGTCTTAAATCCTTTTATATATACCCTAAGAAAC

AAACAGGTGAAACAAGCCCTAAAAGATATAATTAAAAAATGTATCCTTATTGCCTTAAGA

TAA

>LoafORs2.136

ATGAAAAATCAGTCATCTGTGAAAGAATTCATTCTCCTGGGATTAACAAATGACACAGAG

CTAAACATTTTAATTTTTCTTTTTCTTTTTTTAACATATATACTGAGTATAACTGGAAAC

CTGACAATTATCACCCTTACTCTGATAGATTCCCACCTCAAAACTCCAATGTATTTCTTC

CTTAGGAATTTTTCTTTCCTAGAAATCTCATTCACAACAGTTTGTATTCCTAGATTTCTG

GTTAGCATTATAACAGCAGACATGACCATCTCCTATAATTCTTGCATGGCCCAGGTGTTT

TTCCTCATACTCCTTGGTTCAACAGAATTTTTCCTTTTGACAGTTATGTCGTATGATTGT

TATGTGGCCATCTGTAAGCCATTGTATTACACAACAATAATGAACAGCAGAGTCTGCATC

CAGCTACTGATAAGCTCTTGGCTGGCTGGATTTCTTATTATCTTTCCACCTGTAATCTTG

GGACTTCAACTGGATTTCTGCGACTCCAACATCATTGACCACTTCACCTGTGACTCCTCT

CCCATGCTGCTGATTTCCTGCACAGACACAGCATTCCTAGAGCTCTTGGGGTTTCTCCTG

GCAGTGGTCACTCTTGTGGTCACCTTAACATTCGTGATTCTTTCCTATGCTTTAATCCTT

AGGACAATTCTGAGAATCCCCTCTGCTGAGCAAAGAAACAAGGCCTTTTCTACTTGTTCC

TCACACATGATTGTTGTCTCCATTTCTTATGGAAGTTGCATTTTTATGTATGTCAAAACC

TCAGCAAAAGAAGGGGTGGCTTTTACCAAGGGCATAGCAGTGCTCAATACCTCCGTTGCC

CCAATGCTGAATCCTTTCATTTACTCTCTAAGGAACCAACAGGTAAAACAGGCCTTTAAG

AACTTGCTCAAAGGATGCTTCTCAAACAAATTTCAGTCATGA

>LoafORs2.137P

ATGAAGAATCATACAGGGAAGATAGGGTTTATTCTACTGGGACTGACAGATAATTTTCAG

TTACAGACTGTCATTTTCTTATTTCTATTTCTCAGTTACTTGTTGAGCATGATAGGAAAC

TTAACCATCATTGCCCTCACTCTGCTGGATTCCCATCTCAAGACCCCAGTGTATTTCTTC

CTTCGTAATTTCTCTTTCCTGGAAATCTCATTCACAACTGCTTGCATCCCCAGATTTCTA

ATCACCATTCTAAGCAAGGAAAAGACCATTTCCTATAACGGTTGTGCATTTCAGATGTTT

TTTTTATATCTTTTCTGGGGT/TTTTTTTATATCTTTTCTGGGGTTACAGAGTTTTTCCT

TCTGGCTGCTGTGTCCTATGACCGCTACGTTGCCATCTGCAAACCCTTGCATTATACATC

CGTCGTGAGCAGCAGACTGTGTCACCAGCTTGTACTTAGCTCTTGGGTAACTGCCTTCTC

GGTCATTTTCCCTCCACTCACTTTGGGTCTTAATCTGGATTTCTGTGCTTCCAATATCAT

TGACCATTTCATTTGTGACATTTCTCCTGTCCTGCAACTTTCTTGCTTAGACACACATTT

ATTAGAGTTGATTGGTCTTTTAATAGCTCTGATGACACTCATTGTCATCTTGTTATTAGT

AATCATTTCTTACCCTTATATTATCAAGACAATTCTAAAATTCCCTTCAGCTCAGCAAAA

GAAAAAAGCCTTTTCCACTTGCTCTTCACACATGATTGTTGTCTCCATCACTTATGGCTG

TTGTATATTCATCTACATAAAACCATCAGCAAATGAAAGAGTTACTTTAAGCAAAGCAGT

AGGTGTGCTCAGTACTTCAGTTTGCCCCATTGTTGAACCC

>LoafORs2.138P

ATGAAGAATCATACAAAGAACATGGAGTTTATTCCACTGAGACTGACAGGTAATTCTCAG

TTACAGATTGTCATTTTCTTGTTTCTACTTCTCAGTTACATGTTGAGCATGATAAGGAAC

CTAACCACCATTGCCCTCACTCTGCTGGATTCCCATCTCAAGACCCTAATGTATTTCTTC

CTTTGTAATTTCTCTTTCCTGGAAATCTCATTCACA/CAATTCCTAAACACAACTGTAAC

CAGGGAAAAGAGCATTTCCTATAATGGTCGTATGTCTCAGTTGTTTTTTTATATATTTTG

GGGGGTTACAGAGTCTTTCCTTCTGGCTGCTGTGTCCTATGACTGCTATGTTGCCATCTG

CAAACCCTTGCATTGTACATCCATCATGAGCAGCAGACTTTGTCACCAGCTTGTACTCAA

CCCTTGGGTAACTGCATTTTTGGTCATTTTCCTGCCACTGATTTTGTGTCTTAACTTGGA

TTTTTGTGCTTCCAATATCATTAACCATTTCATTTGTGATATTTCTCCTATCTTGCAATC

ATTGTCACATTACTATTAGTAATCATTTCTTATTCCTATATCATCAAGACAATTCTAAAA

TTCCGTTCAGCTCAGCAAAAGAAAAAAAGCCTTTTCCACCTGCCCTTCTCACATGATTGT

TGTCTCCATCACTTATGGCGGTTGTATATTCATCTACATAAAGCCAGCAGCGAATGAAAG

AGTTACTTTAAGCACAGGAGTAGCTGTGCTCAGTACTTCAGTTGCCCCTTTGTTGAATCC

ATTCATTTATACTTTGAGGAACCAGCAAGTAAAACAAGGCTTC

>LoafORs2.139P

TGCCAGTCAAATACTTTTTTTTTTGGACTCTTTGGGGCCACGGAGTTTTTTCTCCTGGCA

GCCATGTCCTATGACCGCTACGTGGCCATCTGCAAGCCCCTCCATTATACGACCATCATG

AACAGCAGAGTCTGTACTGTCCTTGTCCTCTGCTGCTGGATCTCTGGGTTGATGATCATC

ATCACACCGCTCGGTATGGGCCTGCAGCTGGAATTCTGTGACTCCAATGCCATTGATCAT

TTTGGCTGTGATGCAGCTCCTTTTTTTAAGATTTCGTGCTCAGATACATGGTTCGTAGAA

CAGGTAGTTATAATTTGTGCTGTATTGACATCCATTATCACACTCATAGGCGTGGTTCTT

TCTTACGTATACATCATCAAGACGATAGTAAGATTCCCATCTACTCCGCAAAGGAAAAAA

GCTTTTTCCACGTGTTCTTCTCACATGGTCGTTGTTTCCATCACCTATGGTGGCTGTATC

TGCATCTATATCAAACCTTCAGCCAAGGAGGATGTGGACATTAATAAAGGGGTATCTGTG

CTCACTACATCTGTTGCTCCTTTGTTAAACCCCTTTCTTTATACCTTGAGAAATAAGAAG

GTGAAACAATCTTTCAATGATATTTAAAAA

>LoafORs2.140P

ATGTTTTGTGACCGCTTTGTGACCATCTACAAACCCTTGCATTATATGACAATCATGAGC

AACAAAATATGTGAAACAATGGTTATCTGCTGTTGGATGACAGCTTATATGATTATCCTT

CCACCTCTTGGCTTAGGTGTTAAACTGAAATTCTGTGACTCTACTGCCATTGATCATATT

GGCTCTGATGTGCTTCCTATCCTGAAAATCCCACGCTCAGGCACCTGGTTAATTGAGCAG

ATGGTTATAGCCTGTGCTGTGCTGACCTTCATCATCACTCTTGTATATGTAGCTTTCTCC

TACATATATATCATGAAAACAATTCTAAAATTCCCTTCTGTTCAACAAAAGAAAAAGGCC

TTTTCCACCTGTTCTGCCCACGTGATCGTAGTTTCCATCACCTATGGCAGCTGCATCTTC

ATCTATGTCAAACGTTCTGCAAAAGAAGAGGGAGAGACTAATAAAGGTGTTGCAGTGCTC

ATTTCACCCGTATCACCAGTGTTGAATTCTTTCATATATACCTTGAGGAATAAACAAGTT

AAATAAGCCTTT

>LoafORs2.141

ATGCAGGCTTTGCTTTCCCCAGAAGTCAATAATGAGAAACCACACAGCAATAACGACATT

CATCCTTCTGGGACTGACAGAAGATCCTCAGCTGCAGGTTTTGCTTTTTATTTTCCTACT

TACCACCTACGTGTTGAGTGTAACTGGAAATCTGACCATCATCACCCTACCTTGGTGGAT

CCCCACCTTAAAACACCCATGTATTTTTTCCTCCAAAATTTCTCTTTCCTAGAAATCTCA

TTTACAACTGCCTGTGTTCCAAGATTCCTGTACAGTATATCAACTGGAGACAGAACAATT

ACCTATAACGCATATGCCATTCAACTATTTTTTACAGATCTCTTTGGGGTGACTGAATTT

TTCCTTTTGGCCACCATGTCTTATGATCGCTATGTGGCCATCTGTAAACCCTTGCATTAT

ATGACAATCATGAGCAACAAAGTATGTAAAACCATGGTAATCTGCTGTTGGATGGCAGCA

TTTATGATTATCCTCCCACCACTTAGCTTAGGTTTTAATCTGGAATTCTGTGACTCTAAT

GTCATTGATCATTTTGGCTGTGATGCATCTCCTCTCCTGAAAATCTCATGCTCAGACACG

TGGCTAATTGAGCAGATGGTTATAGCCTGTGCTGTACTGACCTTCATCATTACCCTGGTA

TGTGTAGCTCTCTCCTACATATATATCATGAAGACAATTCTAAAATTCCCTTCTGTTCAA

CAAAGGAAAAAGGCCTTTTCCACTTGTTCTTCCCACATGATTGTAGTTTCCATCACCTAT

GGCAGCTGCATCTTCATCTATGTCAATCCTTCTGCAAAAGAACAGGGAGAGATTAATAAA

GGTGTGTCAGTACTCATTTCATCCATATCACCAGTGTTGAATCCTTTCATATATAGCCTG

AGGAATAAGCAAGTTAAACAATCCTTTAATGACTCACTCAAAAAAATTGCATTCCTCTCA

AAGAAGTGTACCTAA

>LoafORs2.142

ATGAGAAATCAAACAGCACTAACAACCTTCATCTTGCTGGGACTGACAGATGATCCTTGG

CTACAAATTCTGACTTTTATCTTTCTATTTCTTTCCTACATGTTAAGTGTAACTGGAAAC

CTAACCATCATCATCCTCACTCTGGTGGATTCCCACCTTAAAACACCAATGTATCTTTTC

CTTCAAAATTTCTCCTTCTTAGAAATTTCATTCACAACTGCTTGTATTCCCAGATTCTTG

TATAGCATGTCTTCTGGGGACAGGTCCATCACCTATGGTGCTTGTGCCAGTCAACTCTTA

TTTATAGACCTCTTTGCAGTAACAGAATTCTTTCTCCTGGCCACCATGTCCTATGATCGC

TATGTGGCCATCTGCAAACCACTGCATTACACAACCATCATGAGCAACAGAGTATGCAAG

AACTTCATCCTCTTTTGTTGGGCAGCAGCACTGGTGATCATTCTTCCACCAATTAGTTTG

GGTTTGGGCCTGGAGTTCTGTGATTCTAACGTCATTGATCATTTTTGCTGTGATGCATCT

CCTATCCTGAAGATCTCTTGCTCAGACACATGGCTGATAGAACAGATGGTTATCGCGTGT

GCTGTGTTCACATTCATCATCACCCTCATGTGTGTAGTTCTTTCCTACATCTATATCATC

AGGACAATCCTAAGGTTTCCCTCTGCCCAGCGAAAGAAAAAGGCATTCTCCACTTATTCT

TCCCACATGATTGTTGTTTCCATTACTTATGGTAGCTGCATCTTCATTTATGTCAAACCT

ACGGCCAAGGACGAGGTGGCAATTAATAAAGGCATTTCACTCCTTATTACTTCTATTTCA

CCAATGTTGAATCCCTTTATTTACACACTGAGAAATAAGCCAGTGAAGCAAGCTTTCAAA

GACTCAATGAAAAAAAAATGCACTCTTCTCAAAGACGTGAAGGTAAAAGGAAGGTTGATG

AATCCAATTAAATGA

>LoafORs2.143

ATGAGAAATCATACAAGACTAACGACGTTCATCCTGCTGGGACTGACAGATGACCCACAA

CTGCAAGTTCTGATATTTGTCTTTCTGCTTGTCACTTACATGTTGAGTGTTACTGGAAAT

CTGACAATCATCATCCTCACATTAGTGAGTTCTCAACTTAAATCTGCCATGTACTTTTTC

CTCCAAAATTTCTCTTTCTTAGAGATCGCATTCACTACAGTCTGTATTCCCAGATTCCTT

TACAGCATGTCTACTGGAGACAATACCATTACTTATAATGCCTGTGCCACTCAACTATTT

TTTATTTTTCTTCTCGGATCAACAGAATTTTTTCTCCTGGCCATCATGTCCTATGACCGC

TATGTAGCCATCTGCAAACCTTTACATTATGTGACCATCATGAGCGGCAGAGTCTGCAGA

AGGTTTGTTCTCTTCTGTTGGGTTGATGGTTTGTTAATCATAACCCCTTCACTTTGCCTA

GGCTTAAATCTGGAATTCTGTGACTCAAATGTCATTGATCATTTTCTCTGTGATGCATCT

CCTATCCTCAAGATCTCTTGCTCAGACACATGGTTCTTAGAACAGATGGTTATAGCCTGT

GCCGTGATGACCTTCATCATGACCCTCATGTGCGTGCTTCTTTCCTACATATTCGTCATC

AAGACAATTCTAAAATTCCCCTCTGCTCAGCAAAGGAAAAAGGCTTTTTCCACATGTTCT

TCCCACATGATCGTTGTATCCATCACCTATGGAAGCTGCATCTTCGTTTACATTAAACCT

TCTGCAAAGGAAGAAGTGGACGTTAATAAGGGTGTAATTGTGCTCACGACTTCCATTGCC

CCCATGCTAAACCCATTTATATATACCCTGAGGAACAAGCAAGTGAAACAAGCTTTGAAT

GATGCAATCAAAAGAATTGCATTTCTCTCAAAGAAATAG

>LoafORs2.144

ATGTCAATGATGAGAAACCATACATCAGTAACTACATTCATACTTCTGGGACTGACAGAT

GATCCTCAAATGAAGGTTCTGATTTTTATATTTCTGTTTGTCACCTACACATTGAGTTTA

ACTGGGAACCTGACCATCATTATACTCATTTTAGTGGATTCTCACCTTAAAACTGCCATG

TACTTTTTCCACCAAAACTTTTCCTTTTTAGAAATTTCATTCACCACAGTCTGTATTCCC

AGATTCCTATATAGCTTATCAACTGGGGACAATACTATTACCTACAATGCTTGTTTTGCT

CAAATATTTTTTATCTTCTTCCTTGGAGCTATAGAATTTTTTCTTCTGGCCATCATGTCC

TATGATCGCTGTGTAGCCATCTGTAAACCCCTGCACTATGTGACCATCATGACTAGGAGA

GTATGTGGAAAGCTAGTTTTCTGCTGTTGGATAGCAGGGTTTTTGGTCATAATCACACCA

CTTTGTCCACTCTTACCCCTGGAATTCTGTAACTATAATGTCATTGATCCCTTTCGCTGT

GATGTTCCTCCTCTCCTGAAGATTTCTTGTTCAGACACGTGGTTTATGGAACAGATGACT

GTAGCCGTTGCCGTTGTGACTACCATCATGGCCCTTCTGTGTGTAGTGTTGTCCTATATG

TATATCATCAAGACTATCATAAAGTTCCCTTCTGCCCAGCAAAGGACGAAAGCCTTTTCT

ACCTGCTCTTCCCACGTGATTGTGGTTTCTATGACCTATGGTGGTTGTATCTTCATCTAT

ATAAAACCTTCAGCAAAGGAAGGAGTGGCCATTAATAAGGGTGTGGCACTGCTTACTATT

TCATTTGCCCCCGTGTTAAACCCATTTATTTATACCCTGAGGAACAAGCAAGTGAAACAT

GCTTTCATAGACTTAATCAAAAGAATTTCATTTATCTCACATAAATGA

>LoafORs2.145P

ATGAGAAACCATGCAAGACTAATGACATTCATCCTGCTGAGAATGACAGATGCCCCACAA

CTGCAAGTTCTGATATTTACCTTTCTGCTTGTCACTTACATGTTAAGTGTTACTGGAAAT

CTGTCAATCATCTTCCTCACCTTAGTGAGTTCTCAACTTAAATCTGCCATATACTTTTTC

CTTCAAAATTTCTCTTTCCCGGATATCTCATTCACTACAATCTGTATTCCTAGATTGCTT

TACAGCACATCTACTGGAGACAATACCATTACTTATAATGCCTGTGCCACTCAACTATTT

TTTTTTTTTCTTGGATCAACAGAATTTTTTCTCCTGTCCATCATGTCCTATGACTGCTAT

GTAGCCATCTGCAAACCTTTACATTATGTGACCATCATGAGCGGCAGAGTCTGCAGAAGG

CTTGTTCTCTTCTGTTGGGTTGATGGTTTGTTAATCATAACCCCTTCACTTTGCCTAGGC

TTAAATCTGGAATTCTGTGACTCAAATGTCATTGATCATTTACCCTGTGATGCATCTCCT

ATCCTCAAGATCTCTTGCTCAGACACATGGTTCTTAGAACAGATGGTTATAGCCTGTGCC

GTGATGACCTTCATCATGACCCTCACGTGTGTGCTTCTTTCCTATGTATTCATCACCAAG

ACAATTCTAAAATTCCCCTCTGCTCAGCAAAGGAAAAAGCCTTTT

>LoafORs2.146P

AACGTCTGTGCTTTTCAATTATTTTTTACTTACCCTTTTGGAATAACAGAATTTTTTCTC

CTAGCCACTACGTCCTTTGACTGCTATGTGTTCATCTGCAAACCCTTGCATTACGTGACC

ATAAGGAATAACAAAGTCTGTAATAGGTTTGTCCTCAGTTGTTGGATGGCTGGTTTGTTA

AACATAATCCCA/CCACTTAGTCTGGGCCTAAATTTGAAATTCTGTGACTCTAATGTCAT

GGATCATTTTTTCTGCGATGCCACTCCCTTCCTAATGATCTCATGCTTAGACACGTGGTT

CAGAGAGCGATTGATTTTAGTGTGTTCTGTTTTGACATTCATCATGACCCTTGTAGTG/G

TAGTTCTGTCCTACATGTATGTCATCACAACAATTCTAAGATTCCCTTCTGCTCAGCAAA

GGAAAAAACCCTTTTCCACCATTCTTTCCACATGCCTGGTTTCCATGACCTACTAGAGCT

GCAACTTCATCTATCTCAAACCTTCATCAAAGGAAGAGGTGGCTCTTAATAGGGGCGCAT

CTCTGCTCATAACTTCTCTTTCACCTGTGTTGAACCCATTTATTTACACTCTGAAAAACA

AGCAAATGAAGAAAGCCTTCAATGACTCAATCAAAAGA

>LoafORs2.147P

ATGGAAAACTATACAATAACAACATTCATACTGCTTGGACTGACAGATGACCCTCAGCTG

TAGGTACTGATTTTTATCTTTCTGTTTTTCACCTACATGTTGAGTGTAACCAGAAACCTG

ACCATCAACACACTCACCTTTGTGGATGCCCAGCTTAAAACTCCCATGTGCTTTTTTTTA

CAAAACTTTTCCTTCTTAGAGATCTCATTCACCTCTGCTTGTATTCCTAGATACTTGTAT

AACATAGCAACAGGTGACAATGTCATA/ACCTACAATGCCTGTGTCATCCAACTGTTTTT

TACTGACCTCTTTGCAGTAACAGAATTTTTCCTCCGGGCTGCCATGTCCTATGATCGCTA

TGTGGCCATCTGCAAACCCCTGCATTACAAGACCATTATGAGCAGCAGAGTCTGCAAGAA

GCTCCTGCTTTGCTGTTGGTTAGCTGGATTGTTGATCATAATCTCGCCACTTAGTCTGGG

ACTAAATCTGAAATTCTGTGACTCAAATGTTGTTGATCATTTTCTCTGTGATGCTTTGCC

CCTCCTGAAGATCTCATGTTCAGGCACATGGTTCATGGAGCAAACTATTATAATCTGTAC

TGTACTGACTCTCATCTTGACCCTCATGGGTGTAGTTCTGTCCTACACTTATATTATCAA

GACAATTTTAGGGATCGTATCTAACCGGCAAAAGAGAAGGGCCTTTTCCACCTGTTCGTC

ACACATGATTGTGGTTTCCATCACCTACGGCACATGCATGTTCATCTATATGAATCCTAC

AGCAAAGGAAGAAATGACCACTAATAAAGTGGTTTCACTACTCATTTCTCCTATTTCACC

TATGTTAAATCCATTTATTTATACCCTGAGAAATAAGCAAGTGGAGAACGCTTTCAAGGA

CTCAATCAAAAGAACTGCA

>LoafORs2.148P

ATGAGAAACGGCACAGTAACATCATTTATTCTGCTGGGACTGACCGATGACCCTCAGCTG

CAGGTTCTGATTTTTATCTTTCTCTTTCTCACCTACATGTTGAGTGTAACTGGGAACCTG

ACCATCATCACCCTCACCTTTGTGGATTCCCACTTGAAAACACCTACGTACTTTTTCTTA

AAGAATTTTTCTTTCTTAGAGACCTCATTCACCTCTGCTTGCATTCCCAGATACCTGTAT

AACATAGCAACAGGTAACAAGGTCATTACCTATAATGCCTGTGTCATCCAAGTGTTTTTT

ACTGACCTCTGTGGAGTAACAGAATTTTTCCTCCTGGCTGCCACGTCCTATGACCGCTAT

GTGGCCATCTGCAAACCTTTGCATTACATGACCATAATGAGTAGCAGAGCCTGCAGGATT

CTCATTATCTGTTGTTGGATGGCTGGTTTCTGTGTAATAATCCCACCACTAAGCCTGGGT

TTAAATCTGGAATTTTGTGACTCTAACGTGCTTGACCATTTTGTCTGTGATGCATATCCC

CTTGTGAAAATCTCATGCTCAGAAACATGGACTGTGGAACAGACAGTTATCATCTGTGCT

GTGCTGACACTAAATATGACTTAGTTGTGTGGTTCTGTCATACGTTAGTATCATCAGGAC

AATATTTAGATTCTCCTCTGTCCAACAAAGGAAAAAGGCCTTTTCAACTTGTTCTGCCCA

CATGATGTGGTTTCCATCACATATGGCACATGCATTCTCATTTATATGAATCCTACAGCA

AAGGAAAAAGTGACCATTAATAAAGTGGTTTCGCTGCTTATTTCTTCTGTTTCTCCTACA

TTGAACCCATTTATTTATACTCTGAGGAACAACCAAGTTAAGAAAGCCTTGAAGTGCTCA

ATCAAAAGACTTCTATTACTCTCAACTAAG

>LoafORs2.149P

ATGAGAAACGGCACAGTAACATCATTCATTCTGCTGGGACTGACCGATGACCCTCAGCTG

CAGGTTCTGATTTTTATCTTTCTCTTTCTCACCTACATGTTGAGTGTAACTGGGAACCTG

ACCATCATCACCCTCACCTTTGTGGATTCTCATCTGAAAACACCTATGTACTTTTTTCTT

AAAAAATTTTTCCTTCTT/TTTTTCTTAAAAAATTTTTCCTTCTTAGAGATCTCATTTAT

CTCTGCTTGTATTCCTAGATATTTGTATAACATAGCAACAGGTAACAAGGTCATTACCTA

TAATGCCTGTGTCATCCAAGTGTTTTTTACTGACCTCTGTGGAGTAACAGAATTTTACCT

CCTGGCTGCCATGACCTATGACCGCTATGTGGCCATCTGCAAACCTTTGCATTACATGAC

CATAATGAGTAGCAGAGCCTGCAGGATTCTCATTATCTGTTGTTGGATGGCTGGTTTCTG

TGTAATAATCCCACCACTAAGCCTGGGTTTAAATCTGGAATTTTGTGACTCTAACGTGCT

TGACCATTTTGCCTGTGATGCATTTCCCATCATGAAAATCTCATGCTCGGACACATGGAT

TATAGAACAGGCAGTTATCATCTGTGCTGTGCTGACCCTAAATATGACTCTTACTTGTGT

AGTTCTGTCATACGGTAGTATCATCAGGACAATATTTAGATTCTCCTCTGTCCAACAAAG

GAAAAAGGCCTTTTCAACTTGTTCTTCCCACATGATTGTGGTTTCCATCACCTATGGCAC

GTGCTTTTTCATCTATATGAATCCAACATCAAAGGAAGAAGTGACCATTAATAAAGTGGT

TTCACTGCTCATTTCTTCTATTTCTCCTACATTGAACCCATTTATTTATACTCTGAGGAA

CAATCAAGTTAAGAAAGTCTTCAGGAACTCGATGAAAAGACTTGCATTGCTCTCAAATAA

G

>LoafORs2.150

ATGAGAAACCACACAGTAACCAATTTTATCCTGCTGGGACTGAGCAATGACCCACAACTG

AAGGTTGTGATTTTTATCTTTCTATTTCTCACCTATATATTGAGTGTAACTGGGAACCTG

ACAATCATCTCCCTCACCTTCATTGACTCTCGCCTTAAAACTGCCATGTACTTTTTCCTA

CAAAATTTCTCCTTCTTGGAAATCTCATTTACATCTGCTTGTATTCCCAGTTACCTCTAC

AACATATCGACAGGTGACAGGACAATCACATATGACAATTGTGCCATTCAAATTTTTTTT

ATTGACCTCTTTGCTGTTACAGAATTTTTTCTTCTTGCCACCATGTCCTATGACAGATAC

ATAGCCATCTGCAAACCCCTACATTATGTGACCATCATGAACAACAAGGTCTGTAGAAGA

CTCATTCTGTGTTGCTGGACAGCTGGCTTGTTAATCATACTCCCACCGCTAAGCCTGGGC

CTAAGTCTGGAATTCTGTGACTCTAATGTCATCGATCATTTTGCCTGTGATGCATCCCCT

CTCCTAAAGATCTCATGCTCAGAAACATGGCTCATAGAGCAGGTGGTCATGGTTTGTGCT

GTGCTGACCTTTATCACGACCCTTGTATGTGTTGTCCTGTCTTATGTTTACATCATCAAG

ACTATTCTTCGATTCTCTTCTGCCCAGCAAAGGAAAAAGGCATTTTCTACCTGCTCTTCC

CACATGACTGTGGTTTCCATCACCTATGGCAGCTGCATTTTCATCTATATCAAACCTTCA

CCAAAAGAATCAGTGTCCATTAATAAGGGTGTGACAGTACTCACGTCTTCCATCTCCCCC

ATGCTGAATCCCTTCATTTACACCCTGAGGAACAAGCAAGTAAAACAAGCTTTCAATGAC

TCAATCAAAAGGATTGCGTTGCTTTTAAAGAAGTTAAGAAATTCACAAACGGAAAGCAAT

TAA

>LoafORs2.151

ATGAGAAACGGCACAGTAACATCATTCATTCTGCTGGGACTGACTGATGACCCTCAGCTG

CAGGTTCTGATTTTTATCTTTCTCTTTCTCACCTACAGGTTGAGTGTAACTGGGAACCTG

ACCATCATCACCTTCACCTTTGTGGATTCCCACCTGAAAACACCTATATACTTTTTCTTA

AAAAATTTTTCCTTCTTAGAGATCTCATTCACCTCTGCTTGTATTCCTAGATACTTGTAT

AACATAGCAACAGGTAACAAGGTCATTACCTATAATGCCTGTATGAGCCAAGTGTTTTTT

ACCGACATTTGTGGAACAACAGAATTTTTCCTCCTGGCCGCCATGTCCTATGATCGCTAT

GTGGCCATCTGCAAACCCTTGCATTACATGACCATTGTGAGCAGCAGAGTCTGCGGGATT

CTCATTACCTGTTGTTGGATGGCTGGTTTCTGTGTAATATTCCCACTAATATGCCTTTGT

TTAAATCTGGAGTTTTGTAATTCTAATGTGCTTGACCATTTTGCCTGTGATGCATTTCCC

CTTGTGAAAATCTCATGCTCAAACACATGGATTATAGAACAGACTGTTATCATCTCTGCT

GTGCTGACCCTAAATATGACTCTTACTTGTGTAGTTCTGTCATATGGTAGCATAATCAGG

ACAATATTTAGATTCCCCACAGTACAACAAAGGAAAAAAGCCTTTTCAACTTGTTCTTCC

CACATGATTGTGGTTTCCATTACCTATGGCACGTGCATTTTCATCTATATGAATCCAACA

GCAAAGGAAGAAGTGACCATTAATAAATTGGTTTCACTGCTTATTTCTTCTGTTTCCCCA

ACTTTGAACCCATTTATTTATACCCTGAGGAATAATCAAGTTAAGAAAGCTTTCAAGGGC

TCATTTGAAAGGCTTGCATTGTTCTCAACTAAGTAA

>LoafORs2.152

ATGAGAAACGGCACAGTAACATCATTCATTCTTCTGGGACTGACTGATGACCCTCAGCTG

CAGGTTCTGATTTTTATCTTCCTCTTTCTCACCTACATATTGAGTGTAGCTGGGAACCTG

ACCATCATCACCCTCACCTTTGTGGATTCCCACCTGAAAACACCTATGTACTTTTTCTTA

AAAAATTTTTCCTTCTTAGAGATTTCATTCACCTCTGCTTGTATCCCCAGATACCTGTAT

AACATAGCAACAGGTAACAAGGTCATTACCTATAATGCCTGTATGAGCCAAGTGTTTTTT

ACTGACATCTGTGGAACAACAGAATTTTTCTTCCTGGCCGCCATGTCCTATGACCGCTAT

GTGGCCATCTGCAAACCCTTGCATTATGTGACCATCATGAGCAGCAGAGCCTGCAGGATT

CTCACTATCTGTTGTTGGATGGCTGGTTTATGTGTAATAATCCCACTACTAAGCCTTTGT

TCGAATCTGGAATTCTGTGGCTCTAACATGCTTGACCATTTTACCTGTGATGAATTTCCC

CTTGTGAAAATCTCATGCTCAACTACATGGATTGTGGAACAGACAGTTAACATCTCTGCT

GTGCTGACCCTAAATATGACTCTTACTTGTGTGGTTCTGTCATATGGTAGTATCATCAGG

ACAATATTTAGATTCCATTCTGTCCACCAAAGGAAAAAGGCCCTTTCTACTTGTTCTTCC

CACATGATTGTGGTTTCCATCACCTATGGCACGTGCATTTTCATCTATATGAATCCTACA

GCAAAGGAAGAAGTGACCATTAATAAAGTGGTTTCACTGCTTTTTTCTTCTGCTTCACCA

ACTTTGAATCCTTTTATTTATACCCTGAGGAATAATCAAGTTAAAAAAGCTTTCAAGGAC

TCCTTTGAAAGACTTGCATCGCTCTCAACTAAGTAA

>LoafORs2.153

ATGAGAAACGGCACGGTAACATCATTCATTCTGCTGGGACTGACCGATGACCCTCAGCTG

CAGGTTCTGATTTTTGTCTTTGTCTTTCTCACCTACATATTGAGTGTAACTGGGAACCTG

ACCATCATCACCCTCACCTTTGTGGATTCCCATCTGAGAACACCTATGTACTTTTTCTTA

AAAAATTTTTCCTTCTTAGAGATCTCATTCACCTCTGCTTGCATCCCCAGATACCTGTAT

AACATAGCAACGGGTGACAAGGTCATTACCTATAATGCCTGTATGATCCAAGTGTTTTTT

ACTGACATCTGTGGAGCAACAGAATTTTTCCTCCTGGCCACCATGTCCTATGACCGCTAT

GTGGCCATCTGCAAACCCTTGCATTATGTGACAATTGTGAGCAGCAGAGTCTGCAGGATT

CTCATTAACTGTTCTTGGATGGCTGGTTTTTGTGTAATAGTCCCACTACTAAGCCTGTGT

TTAAAGCTGGAATTTTGTGACTCTAATGTGCTTGACCATTTTGCCTGTGATGCCTTTCGT

CTTGTGAAAATCTCATGCTCGGATACATGGATTATAGAACAGACAGTTATCGTCTGTGCT

GTGCTGACCCTAAATATGACTCTTACTTGTGTAGTTCTGTCATACGGTAGTATCATCAGG

ACAATATTTAGATTCCCCTCTGTCCAACAAAGGAAAAAGGCCTTTTCAACTTGTTCTTCC

CACATGATTGTGGTTTCCATCACCTATGGCACGTGCTTTTTCATCTATATGAATCCTACA

GCAAAGGAAGAAGTGATTATTAATAAAGTGGTTTCACTGCTTATTTCTTCTGTTTCACCA

ACATTGAACCCGTTTATTTATACCCTGAGGAATAATCAAGTTAAGAAAGCTTTCAAGGAC

TCATTTAAAAGATTTATATCACTCTCAACTAAGTAA

>LoafORs2.154

ATGATGAGAAACCAGACAATAACAATTTTTCTCCTGCTGGGACTGACCGATGACCCCCAA

CTGAAGGTTGTGATTTTTATCTTTTTATTTCTCACCTACATGTTGAGTGTAACTGGGAAC

CTGACAATCATCTCCCTCACCTTCATGTATTCTCACCTTAAAACTGCCATGTACTTTTTC

TTGCAAAATTTCTCCTTCTTAGAAATCTCCTTTACATCTGCTTGCATTCCCAGATACCTC

TACAACATATCAACGGAGGACCGGACAATCACATATGATAATTGTGCTATTCAAATTTTT

TTTACTGACCTCTTCGGTGTAACAGAATTTTTTCTTCTGGCCACCATGTCCTATGACCGA

TATGTAGCCATCTGCAAACCCCTACATTATGTGACCATTATGAACAACAAGGTCTGTAGA

AGACTCATCTTGTATTGCTGGACAGCTGGCTTGTTGATCATACTCCCACCACTTAGCCTG

GGCCTAAATCTGGAATTTTGTGACTCTAATGTCATTGACCATTTTGCTTGTGATGCATCC

CCTCTCCTAAAGATCTCATGCTCAGAAACATGGCTCATAGAGCAGGTGGTCATAGTTTGT

GCTGTGTTGACCTTTATCATGACCCTAATATGTGTTGTCCTGTCCTATGTATACATCATC

AAGACCATTCTTCAATTCCCTTCTGCCCAGCAAAGGAAAAAGGCATTTTCTACCTGCTCT

TCCCACATGATTGTGGTTTCCATCACCTATGGCAGCTGCATCTTCATCTATGTCAAACCT

TCAGTAAAGAATTCAGTGGCCATTAATAAGGGTGTGATGGTGCTCACGACGTCCATTGCC

CCCGTGCTGAACCCCTTCATTTATACCCTGAGGAACAAGCAAGTAAAAGAAGCCTTCAAT

GACTCAATCAAAAGGATTGCATTGTTCTTAAAGAAATAA

>LoafORs2.155

ATGATGAGAAACAACACAATAACATTTATCCTGCTGGGACTGACTGATGACCCACAACTG

AAGGTTGTGATTTTCAACTTTCTCTTTCTCACCTACATGTTGAGTGTAACTGGGAACCTA

ATAATCATTTTTCTCACCCTCAACAATTCTCACCTTAAAACTGCCATGTACTTTTTCCTA

CAAAATTTCTCCTTCTTAGAAATTTCTTTTACATCTGCTTGTATTCCCAGATACCTCTAC

AACATGTCAGTCGGTGACAGGACAATCACATACAACGATTGTATCATTCAAATGTTTTTT

ACTGACCTCTTTGGTGTAACAGAATTTTTTCTTCTGGCCACCATGTCCTATGACCGATAT

GTAGCCATCTGCAAACCCTTACATTACGTGACCATCATGAACAACAAGGTCTGTAGAAGA

CTCATCTTGTATTGCTGGACAGCTGGGTTATTGATCATACTCCCACCACTTAGCCTGGGC

CTAAATCTGGAATTTTGTGACTCTAATGTCATTGACCATTTTGCTTGTGATGCATCCCCT

CTCCTAAAGATCTCATGCTCAGAAACATGGCTCATAGAGCAGGTGGTCATAGTTTGTGAT

GTGTTGACCTTTATCACCACTCTTGTATGTGTTGTCCTGTCCTATGTATACATCATCAAG

ACCATTCTTCAATTCCCTTCTGCCCAGCAAAGGAAAAAGGCATTTTCTACATGCTCTTCC

CATATGATTGTGGTTTCCATCACCTATGGCAGCTGCATCTTCATCTATGTCAAACCTTCA

GCAAAGAATTCGGTGGCCATTAATAAGGGTGTGATGGCGCTCACTACGTCCATCGCCTCC

GTGCTGAACCCCTTCATTTACACCCTGAGGAATAAGCAGGTAAAACAAGCCTTCAATGAC

TCAATCAAAAGGATTGCATTGTTCTTAAAGAAAAAAATAAATTTGCTGATGTAG

>LoafORs2.156

ATGAAAAACCACACAATAACAACCTTTATCCTGCTGGGACTGACAGATGACCCAAAACTT

CAGATTCCAATTTTTATTTTTCTATTTCTTGCTTATATGTTGAGTATAACTGGAAATCTT

ACCATCATATCCCTCATTTTAATGGACTCCCACCTCAAAACACCCATGTACTTTTTCCTA

CAAAACTTCGCCTTTTTAGAAATTTCATTCACATCTGCTTGTATTCCTAGATACTTGTAC

AACATAGCAACAGGTGACAGATTAATTACTTATAATATTTGTGTGATTCAAGTATTTTTC

ACTGATGTCTTTGGAGTGACAGAATTTTTCCTTCTGGCTATCATGTCCTATGACCGCTAC

GTGGCCATCTGCAAACCACTGAATTACGTGACCATCATGAGCAGCAGAGTCTGCAAGACA

CTTGTCCTCTGCTGTTGGATGGCTGGTTTATTGATCGTATTCCCACCACTTACTTTTTTC

AAAACCTTGAAATTCTGTGACTCAAATCTCATTGATTATTTTTATTGTGATGCGTCTCCT

ATCCTGAAGATTTCCTGCTCAGACACATGGTTCATAGAGCAATTTGTTATTGTCTGTGCT

GTGCTCACTTTCATTCTGACCCTTATATGTGTTGTTCTGTCCTACATATACATTGTGAAG

ACCATTCTAAGGTTCCCCTCTGCCCAGCAAAGAAAAAGGGCCTTTTCTACCTGTTCTTCC

CACATGATTGTGGTTTCCATCACCTATGGCAGCTGTATCTTTATCTATGTCAATCCTTCA

GCGAAGCAATCAGTGGCTATTAATAAAGCTGTGACAGTGCTAATGACATCCATTGCTCCC

ATGTTGAACCCATTCATTTATACTCTGAGAAACAAACAAGTGAGACAGGCCTTCAGTGAC

TCCTTCAAAAGAATTGCATTTGTTACAAAGAAGTAA

>LoafORs2.157P

TTTCTCGCAAAATTTGTCTTTCTTAGAAATCTTGTTTATATCTGCTTATATTCCCAGAGA

CTTGTGAAGGTATCAACAGGTGACAAGATATATATGACAACTGTGTCATTCTATTTATTA

TTATTATTTTTTACTGACTTCTTTGCTGTTACAGATTTTTTTCCCCCAGCCATCATGTCC

TATGACTAATACATAGCCAGCTGCAAACCTCTACATTACATGACCATCATGAACAACAAG

GTCAGAAGTTGACTCGTCCTTTGTTGCTGGACAGCTGGCTTGTTGATCATACTCCCACTA

CGAAGCCTGGGCCTAAATCTGGAATTCTCTGACTCTAATGTCATTGACCATTTTGTCTGT

GATGCAGCCCCTCTCCTAAACATCTCATGCTCAGAAACATGGTTCATAGAGCAG/GTGGT

CATAGTTTGTGCTCTGTTGACCTTTGTCATGACCCTTATATGTGTTGTCCTGTCCTATGT

GTACATCATCAAGACCATTCTTCAATTCCTTTCTGCCCAGCAAAGGAAAAGGGCATTTTC

TACCAGCTCTTCCCACATGATTGTGGTTTCCATCACCTATGGAAGCTGCATCTTAATCTA

TGTCAAACCTTCAGCAAAGAATTCAATGGCCATTAATAAGGGTGAGATGGTGCTCATTAC

TTCCATCACCCCCATGCTGAACGCCTTCATTTACACCCTGGGAAACAAGCAGGTAAAACA

AGCCTTCAATGATTCAATCAAAAGGATTGCATTGTTCTTAAAGAAG

>LoafORs2.158P

ATGACATGCAGATTGGACAGAAGTCAGGAGTCAGTGATGACAAACCACACAGTAATGACA

TTCATCCTGCTGGGACTGACAGATGACCCACAGCTGCAGGTTTTGATTTTTATCTTTCTC

TTTCTCACCTACATGTTGAGTGTAACTGGGAACCTGACAGTCATCACGCTCATCTTACTG

GATTCTCACCTTAAAACAGCCATGTACTTCTTTCTACAAAACTTCTCCTTCTTAGAGATC

TCATTCACATCTGCCTGTATTCCCAGGTACTTGTACAACATAGGAACAGGTGACAAGCTC

ATTACGTATAGTGCCTGTGCCACTGAAGTATTTTTTACTGACCTCTTTGGTGTAACAGAA

TTTTTCCTCCTAGCTGCCATGCCCTATGACCGCTGTATGGCCATCTGCAAACCTCTACAC

TATGTGACCATCATGAACAGCACAGTCTGCAGAAGACTTGTATTTTGCTGTTGGGCGGCT

GGTCTGTTTATAATTATAATTATAATCCCCCCACTCATCCTGGGCTTGAATCTGGAATTT

TGCAATTATCTGTGATGCAACTCCCCTCCTGAAGATCTCTTGATCTAATACTTGGTTCAT

GAATAGATGGTATAATCTGTGCTGTGCTGACTCTCATTATGACACTTATGTGTGTCTTCC

TGTCCTACATTTGTATCCTCAAGACAATTCTAGAATTTCCATCTGCTCAGCAAAAGAAAA

AAGCCTTTTCTACTTGTTCTTCCCACATGATTCTGGTTTCTATCACCTATGGCAGCTGCA

TCTTCATCTACATTAAACCTTCAGCAAAATAATTCAGTGGCCATTAATAAGGGTGTGACA

GTGCTCACCACTTCCATTGCCCCCATGCTGATCCCCTTCATTTACACCCTGAGGAACAAG

CAAGTAAAATAGGCCTTCAGTGACTCAATCAAAAGAATTGTAATATTTTCCAAAAAA

>LoafORs2.159

ATGAAAAACCACACAATAACAACCTTTATCTTGCTGGGACTGACAGATGACCCAAAACTT

CAGATTCCAATTTTCATTTTTCTACTTCTCATGTATATGTTGAGTATAAGTGGAAATCTG

ACCATCATATCCCTCACTTTAGTGGACTCCCACCTCAAAACACCCATGTACTTTTTCCTG

CAAAATTTTGCCTTTTTAGAAATTTCATTCACATCTGCTTGTATTCCTAGATATTTGTAC

AATATAGCAACAGGTGACAGATCAATTACTTATAATATTTGTGTGATTCAAGTATTTTTC

ATTGATGTCTTTGGAGTGACAGAATTTTTCCTTCTGGCTATCATGTCCTATGACCGCTAC

GTGGCCATCTGCAAACCACTGCATTATGTGACCATCATGAGCAGCAGAGTCTGCAAGACA

CTTGTCCTCTGCTGTTGGATGGCTGGCTTATTGATCATATTCCCACCACTTACTTTGTTG

CTAAACTTGAAATTCTGTGACTCAAATGTGATTGATTATTTTGTCTGTGATGCACCTCCT

ATCCTGAAGATTTCTTGCTCAGACACATGGCTCATAGAGCAATTAGTTATTGTCTGTGCT

GTGCTCACTTTCATTCTGACCCTTATATGTGTTGTTCTGTCCTACATATACATTGTCAAG

ACCATTCTAAGGTTCCCTTCTGCCCATCAGAGAAAAAGGGCCTTTTCCACCTGTTCTTCC

CACATGATTGTGGTTTCCATCACCTATGGCAGCTGTATCTTTATCTATGTCAATCCTTCA

GCAAAGCAATCAGTGGCTATTAATAAAGGTGTGACACTGCTAATGACATCCATTGCTCCC

ATGCTGAACCCATTCATTTACACTCTGAGAAACAAACAAGTGAGACAAGCCTTCAGTGAC

TCCTTCAAAAGAATTGCATTTGTTACAAAGAAGTAA

>LoafORs2.160

ATGAAAAACCACACAATAACAACCTTTACCCTGCTGGGACTGACAGATGACCCAAAACTT

CAGATTCCAATTTTCATTTTTCTACTGCTCATGTATATGTTGAGTATAAGTGGAAATCTG

ACCATCATATCCCTCACTTTAGTGGACTCCCACCTCAAAACACCCATGTACTTTTTCCTA

CAAAATTTTGCCTTTTTAGAAATTTCATTCACATCTGCTTGTATTCCTAGATATTTGTAC

AATATAGCAACAGGTGACAGAGCAATTACTTATAATATTTGCGTGATTCAAGTATTTTTC

ATTGATGTCTTTGGAGTGACAGAATTTTTCCTTCTGGCTATCATGTCCTATGACTGCTAC

GTGGCCATCTGCAAGCCACTGCATTACGTGACCATCATGAGCAGCAGAGTCTGCAAGACA

CTTGTCCTCTGCTGTTGGATGGCTGGCTTACTGATCATATTCCCACCACTTACTTTGTTC

CTAAACTTGAAATTCTGTGACTTAAATGTGATTGATTATTTTGTCTGTGATGCACCTCCT

ATCCTGAAGATTTCTTGCTCAGACACATGGCTCATAGAGCAATTAGTTATTGTCTGTGCT

GTGCTCACTTTCATTCTGACCCTTATATGTGTTGTTCTGTCCTACATATACATTGTCAAG

ACCATTCTAAGGTTCTCTTCTGCCCATCAGAGAAGAAGGGCCTTTTCCACCTGTTCTTCC

CACATGATTGTGGTTTCCATCACCTATGGAAGCTGTATCTTTATCTACATCAATCCTTCA

GGAAAGCAATCATTGGGTAGTAATAAAGGTGTGTCAGTGCTAGTGACATCCATTGCTCCC

ATGTTGAACCCATTCATTTACACTCTGAGAAACAAACAAGTGAGACAAGCCTTCAGTGAC

TCCTTCAAAAGAATTGCATTTGTTACAAAGAAGTAA

>LoafORs2.161P

ATGACATGCAGATTGGACAGAAGTCAGGAGTCAGTGATGACAAACCGCACAGTAACGACA

TTCATCCTGTTGGGACTGACAGATGACCCACAGCTGCAGGTTTTGTGTTTTATCTTTCTC

TTTCTCACCTATATGTTGAGTGTAACTGGGAACCTGACAATCATCACACTCGTCTTATTG

GATTCTCACCTCAAAAGAGCCATGTACTTCTTTCTACAAAATTTCTCCTTCTTAGAGATC

TCATTCACATCTGCCTGTATTCCCAGGTATTTGTACAACATAGGAACAGGTGACAAGCTC

ATTACCTACAGTGCCTGTGCCAGTCAAATATTTTTTACTGACCTCTTTTTGTGACAGAAT

TTTTCCTTCTGGCTGCCATGTCCTATGACTGCTATGTGGCCATTTGCAAACCTCTACACT

ATGTGACCATCATGAACAGCACAGTCTGCAGAAGACTTGTATTTTGCTGTTGGGCGGCTG

GTCTGTTTATAATTATAATTATAATCCCCCCACTCATCCTGGACTTGAATCTGGAATATT

GCAATTATCTGTGATGCAACTCCCCTCCTGAAGATCTCTTGATCAAATACTTGGTTCATG

GTATAGACTGTTATAATCTGTACCGTGCTGACTCTCATTATGACGCTTATGTGTGTCTTT

CTGTCCTACATTTATATTACCAAGGCAATTCTAGTATTTCCATCTGCTCAGCAAAAGAAA

AAAGGCTTTTCTAATTGTTCTTCCCACATAATTGTGGTTTCTATCACCTATGGCAGCTGC

ATCTTCATCTACATTAAACCTTCAGCAAAGAATTCAGTGGCCATTAATGAGGCCGTGACA

GTGCTCACCACTTCCATTGCCCCCATGCTGATCCCCTTCTTTTACACCCTGAGGAACAAG

CAAGTAAAACAGGCCTTCAATGACTCAATCAAAAGAGTTGTGATATTTTCCAAAAAA

>LoafORs2.162P

ATGATGGAAAAGCAAACAGTAACATTTATCCTGCTGGGACTGACAAATGATCCACAACTA

AAAGATGTGATTTTTATCTTTCTATTTCTTACCTGTATGTTGAGTGTAACTGAGAACCTA

ACAATCATTCCCCCCTGCCCCATCAGTTCTCACCTTAAAACTGCCATGTACTTTTTCTTA

CAAAATTTCTCCTTCTTAGAAATCTCCTTTACATCTGCTTGTATTCCCAGATGCCTCTAC

AACATATCAACAGGTGACAGGACAATCACAATGGTTATCATTCAAATTTGTTCTACTGAC

TTCTTTGGTGTAACAGAATTTTTTCTACTGGCCACCATGTCCTATGACTGATACATAACT

ACCTGCAAACCTCTGCATTACATGACCATCATGAACAACAAGGTCTACATTAAGACTCAT

CTTGTATTGCTGGACAGCTGGCTTGTGGATCATACTCCCACCACTTAGCCTGGGCCTAAA

TCTGGAATTTTGTGACTCTAATGTCATTGACCAGTTTGTCTGTGATGCAGCCCCTCTCCT

AAAGATCTCATGCTCAGAAACATGGCTCATAGAGCAGGTGGTCAGAGTTTGTGCTGTGTT

GACCTTATCATGGCCCCTATATGTATTGTCCTGTCCCTTGTGTACAGCGTCAAGACCATT

CTTCAATTCCCTTCTGCCCAGCAAAGGAAAAAGCCTTTTTCTACCTGCTTTTCCCACCTG

ATTGTGCTTTCCATCACCTATGGCAGCTGCATCTTCATCTATGTCAAACCTTCAGCAAAG

AATTCAGTGGCCATTAACAAGGGTGTGATGGTGCTCACTACGTCCATCGCCCCCGTGCTG

AACCCCTTAATTTACACCCTGAGAAACAAGCAAGTAAAAGAAGCCTTCACTGACTCAATC

GAAAGGATTGTATTGTTCTTAAAGAAG

>LoafORs2.163

ATGAAAAACTACACAATAACAACCTTTATCCTGCTGGGACTGACAGATGACCCAAAACTT

CAGATTCCAATTTTCATTTTTCTACTTCTCACGTATATGTTGAGTATAAGTGGAAATCTG

ACCATCATATCCCTCACTTTAGTGGACTCCCACCTCAAAACAACCATGTACTTTTTCCTA

CAAAATTTTGCCTTTTTAGAAATTTCATTCACATCTGCTTGTATTCCTAGATATTTGTAC

AACATAGCAACAGGTGACAGATCAATTAGTTATCATATTTGTGTGATTCAAGTATTTTTT

ACTGATGTCTTTGGAGTGACAGAATTTTTCCTTCTGGCTATCATGTCCTATGACCGCTAC

GTGGCCATCTGCAAGCCACTGCATTACGTGACCATCATGAGCAGCAGAGTCTGCAAGACA

CTTGTCCTCTGCTGTTGGATGGCTGGCTTATTGATCATATTCCCACCACTTACTTTGTTC

CTAAACTTGAAATTCTGTGATTCAAATATGATTGATTATTTTGTCTGTGATGCACCTCCT

ATCCTGAAGATTTCTTGCTCAGACACATGGCTCATAGAGCAATTAGTTATTGTCTGTGCT

GTGCTCACTTTCATTCTGACCCTTATATGTGTTGTTCTGTCCTACATATACATTGTCAAG

ACCATTCTAAGGTTCCCCTCTGCCCATCAGAGAAAAAGGGCCTTTTCTACCTGTTCTTCC

CACATGATTGTGGTTTCCATCACCTATAGCAGCTGTATCTTTATCTATGTCAATCCTTCA

GGAAAGCAATCAGTGGATAGTAATAAAGGTGTGTCAGTGCTAATCACGTGCATTGTTCCC

ATGTTGAACCCATTCATTTACACTCTGAGAAACAAACAAGTGAGACAGGCCTTCAGTGAC

TCCTTCAAAAGAATTGCATTTGTTACAAAGACGTAA

>LoafORs2.164P

ATTATTACTATTTTTTACTGACTTCTTTGCTGTTACAAAATTTTTTTTCCACTGGCCATC

AAGTCCTATGTCCAATATGTACCCAACTGCAAACCCCTATATTACTTGACCATTATGAAC

AACTAGATCTGAAGTTGGCTTATCCTTTGTTGCTGGACAGCTGGCTTGTTGATCATACTC

CTACCACTAAGCCTGGGCCTCAATCTGGAATTCTCTGACTCTAATGTCACTGACCATTTC

GTCTGTGATGCAGCACCTCTCCTAAAGATCTCATGCTCAGAAATATGGTTCATAGAGCAG

GTGGTCATGGTTTGTGCAGTGTTCACCTTTATCATGACCCTTGTATGTGTTGTTCTATCC

TATGTACACTTCATCAAGACCATTCTTCAATTCCCTTCTGCCCAGCAAAGGAAAAGGGCA

TTTTCTACCTGTTCTTCCCAGATGGTTGTGGTTTCCATTGTTTATGGAAGCTGCATCTTT

ATCTATGTCAAACCTTCAGCAAAGAATTCAGTGGCCATTAGTAAGGGTGTG

>LoafORs2.165

ATGACATGCAGATTGGACAGAAGTCAGGAGTCAGTGATGACAAACCGCACAGTAACGACA

TTCATCCTGCTGGGACTGACAGATGACCCACAGCTGCAGGTTTTGATTTTTATCTTTCTC

TTTCTCACCTACATGTTGAGTGTAACTGGGAACCTGACAATCATCACACTCATCTTACTG

GATTCTCACCTCAAGACAGCCATGTACTTCTTTCTACAAAATTTCTCCTTCTTAGAGATC

TCATTCACATCTGCCTGTATTCCCAGATACTTGTACAACATAGGAACAGGTGACAAGCTC

ATTACCTATAGTGCCTGTGCCAGTCAAGTATTTTTTACTGACCTCTTTGGTGTGACAGAA

TTTTTCCTCCTGGCAGCCATGGCCTATGACCGCTATGTGGCCATCTGCAAACCCCTGCAC

TACGTGACCATCATGAACAGCACAGTCTGCAGAAGACTTATATTTTGCTGTTGGGTGGCT

GGTCTGTTTATTATAATCCTCCCACTCATCCTGGGCTTGAATCTGGAATTTTGCAATTTG

AATACTATTGATCATTTTTTCTGTGATGCATCTCCCCTCCTGAAGATCTCTTGTTCAAAT

ACTTGGTTCATGGAACAGGCTGTTTTAATCTGTGCTGTGCTGACTCTCATTATGACACTT

ATGTGTGTCTTTCTGTCCTACATTTATATCATCAAGACAATTCTAGGATTTCCATCTGCT

CAGCAAAAGAAAAAAGCCTTTTCTACTTGTTCTTCCCACGTGATTGTGGTTTCCATCACC

TATGGAAGCTGCATCTTCATCTATGTCAAACCTTCAGCAAAGAATTCAGTGGCCATTAAT

AAGGGTGTGATGGTGCTCACAACTTCCATTGCCCCTGTGCTGAATCCCTTCATTTACACC

CTGAGGAACAAGCAAGTAAAACAGGCCTTCGATGACTCAATCAAAAGAGTTGTAATATTC

TGTAAGAAATAG

>LoafORs2.166

ATGATGAGAAACAACACAATAACATTTATCCTGCTGGGACTGACCAATGACCCACAAATG

AAGGTTGTGATTTTTATCTTTCTATTTCTCACCTACATGTTGAGCGTAACTGGGAACCTA

ACAATTATTTTCCTCACTTTCATCAATTCTCACCTTAAAACTGCCATGTACTTTTTCCTA

CAAAATTTCTCCTTTTTAGAAATCTCTTTTACATCTGCTTGTATTCCCAGATACCTCTAC

AACATGTCAGTCGGTGACAGGACAATCACATACAACAATTGTATCATTCAAATTTTTTTT

ACTGACCTCTTTGGTGTAACAGAATTTTTTCTTCTTGCCATCATGTCCTATGACCGATAT

GTAGCCATCTGCAAACCCCTATATTATGTGACCATCATCAACAATAAGGTCTGTAGAAGA

CTCATCTTGTATTGCTGGACAGCTGGGTTATTGATCATACTCCCACCACTTAGCCTGGGC

CTAAATCTGGAATTTTGTGACTCTAATGTCATTGACCATTTTGTCTGTGATGCATTCCCT

CTCCTAAAGATCTCATGCTCAGAAACATGGCTCATAGAGCAGGTGGTCATAGTTTGTGCT

GTGTTGACCTTTATCACCACTCTTGTATGTGTTGTCCTGTCCTATGTATACATCATCAAG

ACCATTCTTCAATTCCCTTCTGCCCAGCAAAGGAAAAAGGCATTTTCTACCTGCTCTTCC

CACATGATTGTGGTTTCCATCACCTATGGCAGCTGCATCTTCATCTATGTCAAACCCTCA

GCAAAGAATTCAGTGGCCATTAATAAGGGTGTGATGGTTCTCACTACATCCATTGCCCCC

ATGCTGAACCCATTCATTTACACCCTGAGGAACAAGCAAGTAAAACAAGCCTTCAATGAC

TCAATCAAAAGGATTGCATTGTTCTTAAAGAAGTAA

>LoafORs2.167

ATGAAAAACCACACAATAACAACCTTTATCCTGCTGGGACTGACAGATGACCCAAAACTT

CAGATAGCCATTTTTATTTTTCTATTTCTCACTTATATATTGAGTATAAGTGGAAATCTG

ACCATCATATCCCTCACTTTAGTGGACTCCCACCTGAAAACACCCATGTACTTTTTTCTA

CAAAAGTTTGCCTTTTTAGAAATTTCATTCACATCTGCTTGTATTCCTAGATATTTGTAC

AACATAGCAACAGGTGACAGATCAATTACTTATCATATTTGTGTGATTCAAGTATTTTTC

ATTGATGTCTTTGGAGTGACAGAATTTTTCCTTCTGGCTATCATGTCCTATGACCGCTAT

GTGGCCATCTGCAAACCACTGCATTACATGACCATCATGAGCAGCAGAGTCTGCAAGACG

CTTGTCTTCTGCTGTTGCATGGCTGGTTTATTGATCATATTCCCACCACTTACTTTGTTC

CTAAACTTGAAATTCTGTGACTCAAATCTGATTGATTATTTTTTCTGTGATGCATCTCCT

ATCTTGAAGATTTCGTGCTCAGACACATGGCTCATAGAGCAATTTGTTATTGTCTGTGCT

GTGCTCACTTTCATTCTGACCCTTATATGTGTTGTTCTGTCCTACATATACATTGTCAAG

ACCATTCTAAGGTTCCCCTCTGCCCATCAGAGAAAAAGGGCCTTTTCCACCTGTTCTTCC

CACATGATTGTGGTTTCCATCACCTATGGCAGCTGTATCTTTATGTATGTCAATCCTTCA

GGAAAGCAGTCAGTGGCTATTAATAAAGGTGTGTCAGTGCTAATGACATCCATTGCTCCC

ATGTTGAACCCATTCATTTACACTCTGAGAAACAAACAAGTGAGACAAGCCTTCAGTGAC

TCCTTCAAAAGAATTGCATTTGTTACAAAGAAGTAA

>LoafORs2.168P

AACTTTTAACCTGATGGGATTGACGAACGACCACAACTAGAAGTTGTGATTTTTATTTTT

CTATTCCTTGCCTACATGTTGAGTGTAACTAGGAACCTGACAATCATCTCCCTCACCTTT

GTTGATTCTCAACTTAAAACTGCCATGTACTTTTTCCTGAAAAATTTGTCTTTCTTAGAA

ATCTTGTTTCTATCTGCTTATATTCCCAGACACTTGTGCAATATGTCAACAGGTGACAAG

ATAATCATACATGTCAATTGTGTCGTTCTTTTTATTATTATT/TTTTTTCCCCTCACCAC

CATGTCCTATGACCAATATGTAGCCAACTGCAAACCCTTACATTACACGACCGTTAGGAA

CAACAAGGCCTGAACTTGACTCATCCTTTGTTGCTGGACAGCTGGCTTGTTGATCATACT

CCCACCACTAAGCCTAGGCCTCAATCTGGAATTCTGTGACTCCAATGTCATTGACCATTT

TGTCTGTGATGCAGCCCCTCTCCTAAAGATTCCATGCTCAGAAAATAGGATCATAGAGCA

G/TTGTGCTGTGTTGACCTTTATTATGACCCTGGTATGTGTTGTTCTGTCCTATGTATAC

ATCACCAAGACCATTCATCAATTCCATTCTGCCATCAAAGGAAAAAAGCATTATCTACCT

GCTTTTCCCACATGACTGTGGTTTCCATCACTTATAGAAGCTGTATCTTAGTCTATGTCA

AACACTCAGCAAAGAATTCAGTGGCCATTAATAAGGGTGTGACAGTGCTCACTACTTCTA

TCACCCCCATGCTGAACATCTTCATTTACACCCTGAGGAACAAGCAATAAAAAAAA

>LoafORs2.169

ATGACATGCAGATTGGACAGAAGTCAGGAGTCAGTGATGACAAACCGCACAGTAACGACA

TTCATCCTGCTGGGACTGACAGATGACCCACAGCTGCAGGTTTTGATTTTTATCTTTCTC

TTTCTCACCTACATGTTGAGTGTAACTGGGAACCTGACAATCATCACACTCATCTTACTG

GATTCTCACCTCAAGACAGCCATGTACTTCTTTCTACAAAATTTCTCCTTCTTAGAGATC

TCATTCACATCTGCCTGTATTCCCAGATACTTGTACAACATAGGAACAGGTGACAAGCTC

ATTACCTATAGTGCCTGCGCCAGTCAAGTATTTTTTACTGACCTCTTTGGTGTGACAGAA

TTTTTCCTCCTGGCAGCCATGGCCTATGACCGCTATGTGGCCATCTGCAAACCCCTGCAC

TACGTGACCATCATGAACAGCACAGTCTGCAGAAGACTTATATTTTGCTGTTGGGCGGCT

GGTCTGTTTATTATAATCCCCCCACTCATCCTGGGCTTGAATCTGGAATTTTGCAATTTG

AATACTATTGATCATTTTATCTGTGATGCATCTCCCCTCCTGAAGATCTCCTGTTCAAAT

ACTTGGTTCATGGAACAGACTGTTTTAATCTGTGCTGTGCTGACTTTCATTATGACACTT

ATGTGTGTCTTTCTGTCCTACATTTATATCATCAAGACAATTCTAGGATTTCTGTCTGCC

CAGCAAAAGAAAAAAGCCTTTTCTACTTGTTCTTCCCACATGATTGTGGCTTCTATCACC

TATGGAAGCTGCATCTTCATCTACATTAAACCTTCAGCAAAGAATTCAGTGGCCATTAAT

AAGGGTGTGACAGTGCTCACCACTTCCATCGCCCCCATGCTGAATCCCTTCATTTACACC

TTGAGGAACAAGCAAGTAAAACAGGCCTTCAATGACTCAATGAAAAGAATTGTAATATTT

TCAAAGAAATAG

>LoafORs2.170P

GTGATGAGAAACAACACAACATTTATCCTGCTGGGACTGACCAATGACTCACAACTGAAG

GTTGTGATTTTCATCCTTCTATTTCTCACTTACATGTTGAGTGTAACTGGGAACCTAACA

ATCATTTTCCTCACCTTCATCAGTTCTCACCTTAAAACTGCCATGTACTTTTTCCTACAA

AATCTCTCCTTCTTAGAAATCTCATTTATATCTGCTTGTATTCCCAGATACCTCTATAAC

ATATCGATGGATGACAGGACAATCACATACAAAAGTTGTATCATTCAAATTTTTTTTACT

GACCTCTTTGGTGTAACAGAATTTTTTCTCCTGGCCACCATGTCCTATGACAGATACATA

GCCATCTGCAAACCCCTATATTACATGACCATCATGAACAACAAGGTCTGTAGAAGACTC

ATCTTGTATTGCTGGACAGCTGGCTTGTTGATCATACTACCACCACTTAGCCTGGGCCTA

AACCTAGAATTCTGTGACTCTAATGTCATTGACCATTTTGCCTGTGATGCATCCCCTCTC

CTGAAGATCTCATGCTCAGAAACATGGCTCATAGAGCAGGTGGTCATGGTT/TGTGCTGT

GTTGACCTTTATCACCACTCTTGTATGTGTTGTCCTGTCCTATGTATACATCATCAAGAC

CATTCTTCAATTCCCTTCTGCCCAGCAAAGGAAAAAGGCATTTTCTACCTGCTCTTCCCA

CATGATCGTGGTTTCCATCACATATGGCAGCTGGATCTTCATCTACGTCAAACCTTTAGC

AAAGAATTCAGTGGCCATTAATAAGGGTGTGATGGTGCTCCTGACTTCCTTTGTCCCCAT

GCTGAACCCATTCATTTACACCCTGAGGAACAAGCAAGTAAAAGAAGCCTTCAATGACTC

AATCAAAAGGATTGCATTGTTCTTAAGTAAA

>LoafORs2.171

ATGAAAAACCACACAATAACAACCTTTATCCTGCTGGGACTGACAGATGACCCAAAACTT

CAGATTCCAATTTTTATTTTTCTATTTCTTGCTTATATGTTGAGTATAAGTGGAAATCTG

ACCATCATATCCCTCACTTTAGTGGACTCCCACCTCAAAACACCCATGTACTTTTTCCTA

CAAAATTTCGCCTCATTAGAAATTTCATTCACATCTGCTTGTATTCCTAGATATTTGTAC

AACATAGCAACAGGTGACAGATCAATTACTTATCATATTTGTGTGATTCAAGTATTTTTT

ACTGATGTCTTTGGAGTGACAGAATTTTTCCTTCTGGCTATCATGTCCTATGACCGCTAC

GTGGCCATCTGCAAACCACTGCATTACGTGACCATCATGAGCAGCAGAGTCTGCAAGACA

CTTGTCCTCTGCTGTTGGATGGCTGGCTTACTGATCATATTCCCACCACTTACTTTGTTC

CAAACCTTGACATTCTGTGACTCAAATATCATTGATTATTTTTATTGTGATGCACCTCCT

ATCCTGAAGATTTCTTGCTCAGACACATGGTTCATAGAGCAATTGGTTATTGTCTGTGCT

GTGCTCACTTTCATTCTGACCCTTATATGTGTTGTTCTGTCCTACATGTACATTATCGAG

ACCATCCTAAGGTTCCCCTCTAGCCAACAAAGAAAAAGGGCCTTTTCCACCTGTTCTTCC

CACATGATTGTGGTTTTCATCACCTATGGCAGCTGTATCTTTATCTATGTCAATCCTTCA

GCAAAGCAATCAGTGGCTATTAATAAAGGTGTGTCAGTGCTAATGACATCCATTGCTCCC

ATGTTGAACCCATTCATTTACACTCTGAGAAACAAACAAGTGAGACAAGCCTTCAGTGAC

TCCTTCAAAAGAATTACAGTTGTCACAAAGAAGTAA

>LoafORs2.172

ATGACGATTGGACAGAGTCAAAAGGTAGTGATGAGAAATCATACAATAACAACATTCATT

CTCCTGGGACTAACGGAAGATCCACAACTGCAAGGCTTGCTTTTTATTTTTCTATTTCTT

ACCTACTTACTGAGTGTAACTGGGAACCTGACCATTATCTCACTCACTTTAGTGCATTCT

CACCTTAAAACACCAATGTACTTTTTCTTACAAAATTTTTCTTTCTTAGAAATCTCATTC

ACATCTGCTTGCATTCCTAGATACTTGTATAACCTAACAACAGGTGACAAGACTATTACC

TACTGTGCTTGTGCCATTCAAGCTTTTTTTACTGATCTTTTGGGAGTCACTGAATTTTTT

CTCCTGGCCATCATGTCCTATGACCGCTATGAGGCCATCTGCAAGCCCCTGCATTACACC

ACCATTATGAACAGCAGAGTGTGCAAAAGACTCATCTTTTGCTGTTGGATGGCTGCCTTG

ATGATCATACTCCCACCATTTAGCCTGACTCAAAATCTGGAATTCTGTGACTCTAATGTC

ATTGACAGCTTTCTCTGTGATGTTTCTCCCTTCCTGAAGATTTCATGCTCAGACACGTGG

ATCATTGAGCAGATGGTTATAGCCTGTGCTGTGTTGACTTTCATCACAACTCTTCTTTGT

GTAGTTCTTTCCTACATATATATCATGAGGACCATTCTAAGATTTCCCTCAGCCCAACAA

AGGAAAAAAGCCTTCTCTACCTGTTCTTCCCACATGATTGTGGTTTCCATCACCTATGGC

AGCTGTATCTTCATCTATGTCAAACCTTCAGCAAAGGAATCAGTGGCTATTAATAAAGGT

GTGATAGTGCTCACCACATCCATCGCTCCTATGCTGAACCCCTTCATTTACACCTTGAGG

AACAAGCAAGTAAAACAAGCCTTCAGTGATTCCATCAAAAGAATTGTCTTATCTTCCAAG

GAGTAA

>LoafORs2.173P

TTTCCTACAAAGTTTTGTCTTATGAAAATTAAGTGTACACCTGCTTGTATTCCTAGATAT

TTATTCAACATACCAGTAGGTGACAGATAAATCATTTGTAATAGCTGAGTCATCCAAATA

GTTTTTATTGATGTATTTGGAGTCACATAATTTTTCTCCTAGCCATCACGTCTTATGACC

ATTATGTGGCCACATGCAAACCCCTCTGTTACATGACTTTCAGGAACAACAGAGTCTGTG

GAAGGCTTGTCGTCTTCTACTGGATAGTTGGTATGTTGATCATACTTCCACCTCTTAAAC

ACAGATAAATTTAGAATTCTGTGACTCTACAATAATTGATTATTTTTCTATGATTCATCT

CCTATCTTGAAGATTTCATGCTCAGACACTTGGCTTTTAGAGCAGATGGTTTTAGCCTGC

GCTGTATTGGTCTTCATCATGACACTTCATTGTGTTGTTCTGTCCTGTGTATACATCATC

AAGATTATTCTAAGATTCCCTTCTGCCCAGCAAAGGAAAAGGGCCTTTTCCACTTGTTCT

TCTCACATGATTTTGGTTTATATCAGCTATGGGAGCTATATCTTCATCTATGTCAAACCT

TCAGTGAAGGAACCAGTAGCCATTAATAAAAGTGTGACCATGCTGATGACAGTCATTGCT

TCCATGTTGAACCCATTTGTTTACACTCTCAGAAACAAA

>LoafORs2.174

ATGAGAAATCATACAATAACAACATTCATTCTCCTGGGACTAACGGAAGATCCACAACTG

CAAGGCTTACTTTTTATTTTTCTATTTCTTACCTACTTTTTGAGTGTAACTGGGAACCTG

ACCATTATCTTACTGACTTTAGCAGATTCTCACCTTAAAACACCAATGTACTTTTTCTTA

CAAAATTTTTCCTTCCTAGAAATCTCGTTCACATCTGCTTGCATTCCTAGATACTTGTAT

AACCTAACAACAGGTGACAAGACTATTACCTACTGTGCTTGTGCCATTCAAGGATTTTTT

GCTGATCTTTTGGGAGTCACTGAATTTTTTCTCCTGGCCATCATGTCCTATGACCGCTAT

GTGGCCATCTGCAAGCCCCTGCATTACACCACCATCATGAACAGCAGAGTGTGCAAAAGA

CTCATCTTTTGCTGTTGGATGGCTGCCTTGATGATCATACTCCCACCGTTTAGCCTGACT

CAAAATCTGGAATTCTGTGACTCTAATGTCATTGACAGCTTTCTCTGTGATGTTTCTCCC

TTCTTGAAGATTTCATGCTCAGACACGTGGGTCATTGAGCAGATGGTTATAGCCTGTGCT

GTGTTGACCTTCATCACAACCCTTCTTTGTGTGATTCTTTCCTACATATATATCATTAGG

ACCATTCTAAGATTTCCCTCACCCCAACAAAGGAAAAAAGCCTTTTCTACCTGTTCTTCT

CACATGATTGTGATTTCCATCACTTATGGCAGCTGTATCTTCATCTATGTCAAACCTTCA

GCAAAGGAATCAGTGGTTATTAATAAAGGTGTGATAGTGCTCACTACGTCCATTGCTCCT

ATGCTGAACCCCTTCATTTATACCTTGAGGAACAAGCAAGTAAAACAAGCCTTCAGTGAC

TCCATCAAAAGAATTGTCTTATCTTCCAAGAAGTAA

>LoafORs2.175P

ATGAAGAACAATTCAATGCAGACAGAGTTCATTCTTTTGGGTTTGACAGATGACCCTGAG

TTGCAAGTTGTAATTTTCCTCTTTCTATATTTTACATACATACTGAGTGTGACAGGGAAC

TTAACCATCATCATTCTCACTCTGCTGGATTCCCGCCTTAAGACACCAATGTATTTCTTC

CTACAAAATTTCTCTTTTTTAGAAATCTCATTCACAACCTTTTGCATTCCAAGATTCCTG

GTGAGCCTCGTGACAAAGGATGAAACTATTTCCTATGTGAGGTGCATGACTCAGTTTTTT

TTTTCATCTTTTTGGGGGTAACTGAATTTTACCTCCTGGCTGCCATGTTTTATGAGCGCT

ATGTGACTATCTGTAAACCCCTTCATTATACCACCATCATGAATAACACAGTTTGCTACA

AACTTGTATTCAGCTCTTGGATAACTGGATTCCTGATTATCTTTCCCCCAGTGATCTTGG

CGACTCAAGTTGGAATTCTGTGCTTCCAATGTCATTGATCATCTAATCTGTGATGCATCT

CCTGTCCTGCAGATATCTTGCTCAGATACACATTTCCTAGAACTAATGTCTTTTTTCTTG

GCTGTAACGACATTAATGGTCACATTGATGTTAGTGATATTTTCCTATGGCTATATCATC

AAGACAATTCTCAAATTCCCTTCTGCTCAGCAAAGGACAAAAGCCTTTTCTACCTGTTCT

TCCCACATGATTGTGGTTTCCATCTCTTACGGCAGCTGTATCTTCATGTACATTAAACCA

TCAGCAAATGATAGAGTGACTTTAAGCAAAGGAGTAGCTGTGCTCAGTACCTCAGTGGCC

CCCTTATTAAACCCCTTCGTTTACACTCTAAGAAATCAGCAAGTGAAACAAGCCTTCAAG

GACATGGTCCAGAAAGTTTTA

>LoafORs2.176P

AGAAATCATACCGCCATAACAGCATTCATCCTGCTGGGGTTGACAGATGACCCAATTCTA

CAGATTGTGCTTTTGATATTTTTATTTCTCACCTACATTTTGAGTGTAACTGGGAACCTG

ACAATTATCACCCTCACACTTTCAGATTCTCACCTTAAGACTCCCATGTATTTTTTCCTC

CGAAATTTCTCTTTCTTGGAAGTGTCATTCACCACTGTCTGTGTGCCCAGATTTCTGTAC

ACCCTGGCAACTGGAGTCAAAACAATTACCTATACTGCTTGTGCCACACAGATGTTTTTT

GTTGTCCTCTTTGGAGCCACCGAGTTTTTTCTCCTTGCTGCCATGTCCTATGATCGCTAT

GTGGCCATCTGTAAGCCCCTGCATTACACAACCATCATGAACAGTAAGGTCTGCACTACC

CTTGTTCTCTGCTCCTGGTTTGCTGGCCTGTTGATCAGCCTCCTACCTTTTAGTATGGGT

CTCCAGCTGGAATTCTGTGACTCAAATCTCATTGATAGTTTTGGCTGTGATACGTATCCT

GTTTTACAGATATCCTGCTCAGACACAACGCTTATAGAAAAAAATGCCTTGGGTTTTGCC

GTGGTAACACTAATTATTACCCTAATTGGTGTGGTTCTTTCATACACATACATTGTCAAG

ACCATTCTAAAATTCCTTTCTGCCCAACAAAGAAAAAAGGCCTTTTCTACACATTCTTCT

CACATGATTGTGGTTTCCATGACCTATGGCAGCTGCATCTTCATCTACATCAAGCCTTCA

GCAAAGGAAGGAGTGGCCCTTAATAAGATGGTGTCAATGCTAGCCACTTCTGTTGCCCCT

TTGCTTAACCCATTCATTTATACACTT

>LoafORs2.177P

ATGAGAAATCGTTCTGCAGTAACAAAATTCATCCTGCTAGGACTAAGAGATGACCCACAA

CTACAAGTTTTTCTAATGGTATTTCTGTTCCTTACCTACATTTTCACCGTTGCTGGAAAT

CTAATCATTATCCTCCTCACACTGGTGGACGTTCATCTCAAAACACCCATGTACTTTTTC

CTTTGCAATTTCTCCATCTTAGAAATAATATTTACAATTGTCTGTGTTCCTAGATTCCTG

TACAGCATGACACTGGGGACAAAA/ACTGGGGACAAAAGTGTTACCTACAATGCTTGTGT

AGTCCAATTATTTTTTGTCATCTTTGTCGGGGCAGCAGAAATCTTTCTTCTAACTGTCAT

GTCCTATGACCACTATGTGGCCATCTGCAAGCCTCTGCGCTACACCACCATCATGAATGA

CAGGGTGTGCACCATATGTGTCCTTGGCTGTTGGCTGACTGGGTTACTTGTCATACTCCC

ACTGCTTAGCCTGGGAGTTCAGCTAGATTTCTGTAACTCCAATCTCATTGACCATTTTGG

CTGTGATGCATCCCCTCTTCTGAAGATTGTTTGCTCAGACACGCAATTTGTAGAACAAGT

TGTTTTAACCATGGATGTGCTAACCCTCATATTCACACTAGTGTGTGTAATTGTATCCTA

TACATACATCATCAAGACCATCTTAGGACTGCCCTCTGCTCAGCAAAGAAAAAAGGCTTT

CTCTACTTGTTCTTCCCATGTGATTGTAGTTTCCCTCACCTATGGAAGTTGCATCTTCAT

CTATATCAAACCAGCAAAGGAAGGAGTGGCCCTTAATAAGGTGGTATCATTGCTCAACAC

CTCATTTATCCCTTTGATGAACCTTTTCATTTACACTCTA

>LoafORs2.178

ATGACAAATCACACAGTGATAACAACATTCATCCTGCTGGGGATGACGGAGGACCCAAAA

TTACAACTTGTGCTTTTGGTATTTTTATTTCTCACCTACTTTTTGTGTGTGGCTGGGAAC

ATGACAATTGTCACTCTCACACTTTTGGATTCCCATCTTCAAACTCCCATGTATTTTTTT

CTCCGAAATTTCTCTTTCTTGGAAGTCTCATTCACCTCCGTCTGTATTCCCAGATTCCTG

TACAGCCTGACAACTGGAGATAAAACTTGTACCTATAATGCTTGTGCCACGCAATTGTTT

TTTGGTATCCTCTTTGGAGCAACTGAGTTTTTTCTCTTTGCTGCCATGTCCTATGATCGC

TACGTGGCCATCTGTAAGCCCCTACATTACACAACCATCATGAACAACAAGTTCTGCACT

ACACTCCTTCTCTGCTGTTGGATTGCTGGCCTGTTGATTATTGTGCCCCCTCTTTGCATG

GGTCTCCAGCTGGAATTCTGTGACTCCAATCTCATTGATAGTTTTGCTTGTGACGCATAT

CCTATCCTACAGATCACCTGTTCAGACACAGAGCTTATAGAAAAGGTTGTTTTGGCTTTT

GCTGTGCTAACACTGATTTCTACCCTACTGGGTGTGCTTCTCTCCTACACATACATCATC

AGCACCATTCTAAAATTCCCTTCTGCCCAACAAAGGAAAAAGGCCTTTTCCACCTGTTCT

TCTCACATGATTGTGGTTTCCATGACCTATGGCAGTTCCATCTTTGCCTACATTAAACCT

TCAGGAAAGGAAGGAGTAGCCCTTAATAAGGTGGTGGGGCTGCTCTTTACTTCAGTTGTC

CCTATGCTTAACCCTTTCATTTATACACTACGAAACAAGCAGGTAAAGGAAGCCTTCAAA

GACACAGTAAAAAGGATTGCATTTCTCATAAAGAAGTAA

>LoafORs2.179

ATGACAAATCACACAGTGATAACAACATTCATCCTGCTGGGGATGACGGAGGACCCAAAA

TTACAACTTGTGCTTTTGGTATTTTTATTTCTCACCTACTTTTTGTGTGTGGCTGGGAAC

ATGACAATTGTCACTCTCACACTTTTGGATTCCCATCTTCAAACTCCCATGTATTTTTTT

CTCCGAAATTTCTCTTTCTTGGAAGTCTCATTCACCTCCGTCTGTATTCCCAGATTCCTG

TACAGCCTGACAACTGGAGATAAAACTTGTACCTATAATGCTTGTGCCACGCAATTGTTT

TTTGGTATCCTCTTTGGAGCAACTGAGTTTTTTCTCTTTGCTGCCATGTCCTATGATCGC

TACGTGGCCATCTGTAAGCCCCTACATTACACAACCATCATGAACAACAAGTTCTGCACT

ACACTCCTTCTCTGCTGTTGGGGTGCTGGCCTGTTGATTATTGTGCCCCCTCTTGGCATG

GGTCTCCGGCTGGAATTCTGTGACTCTAATCTCATTGATAGTTTTGGTTGTGACGCATAT

CCTATCCTACAGATCACCTGTTCCGACACAGAGCTTATAGAAAAGGTTGTTTTGGCTTTT

GCTGTGCTAACACTGATTACTACCCTACTGGGTGTGCTTCTCTCCTACACATACATCATC

AGCACCATTCTAAAATTCCCTTCTGCCCAACAAAGGAAAAAGGCCTTTTCCACCTGTTCT

TCTCACATGATTGTGGTTTCCATGAGCTATGGCAGTTCCATCTTTGCCTACATTAAACCT

TCAGGAAAGGAAGGAATAGCCCTTAATAAGGTGGTGGGGCTGCTCTTTACTTCAGTTGTC

CCTATGCTTAACCCTTTCATTTATACACTACGAAACAAGCAGGTAAAGGAAGCCTTCAAA

GACACCGTAAAAAGGATTGCATTTCTCATAAAGAAGTAA

>LoafORs2.180P

ATGACAAATCACACAGTGATAACAACATTCGTCCTGCTGGGGATGACGGAGGACCCGAAA

TTACAAATCGTGCTTTTGGTATTTTTATTTCTCACCTACTTTTTGTGTGTGGCTGGGAAC

ATGACAATTATCACCCTCACACTTTTGCATTCCCATCTTCAAACTCCCATGTATTTTTTT

CTCAGAAATTTCTCTTTCTTAGAAGTCTCATTCACCTCTATCTGTATTCCCGGATTCCTG

TACAGCCTGACAACTGGAGATAAAACTTGTACCTATAATGCGTGTGCCACGCGATTGTTT

TTTGGTATCCTCTTTGGAGCAACTGAGTTTTTTCTCTTTGCTGCCATGTCCTATGATCGC

TACGTGGCCATCTGTAAGCCCCTACATTACACAACCATCATGAACAACAAGTTCTGCACT

ACACTCCTTCTCTGCTGTTGGGGTGCTGGCCTGTTGATTATTGTCCCCCCC/TTATTGTC

CCCCCCAGGCATGGGTCTCCAGCTGGAATTCTGTGACTCAAATCTCGTTGATAGTTTTGC

TTGTGACGCATATCCTATCCTACAGATCACCTGTTCAGACACAGAGCTTATAGAAAAAGT

TGTTTTGGCTTTTACTGTGCTAACACTGATTTCTACCCTACTGGGTGTGCTTCTCTCCTA

CACATACATCATCAGCACCATTCTAAAATTCCCTTCTGCCCAACAAAGGAAAAAGGCCTT

TTCCACCTGTTCTTCTCACATGATTGTGGTTTCCATGAGCTATGGCAGTTCCATCTTCGC

CTACATTAAACCTTCAAGAAATGAAGGAGTAGCCCTTAATAAGCTGGTGGGGCTGCTCTT

TACTTCAGTTGTCCCTATGCTTAATCCTTTCATTTATACACTACGAAACAAGCAGGTAAA

GGAAGCCTTCAAAGACACCGTAAAAAGGATTGCATTTCTCATAAAGAAG

>LoafORs2.181

ATGATGAGAAACCACTCAGCAATAACAGCATTCACCATGCTGGGATTTACAAATGACTCA

CAACTGCAGATTTTGATTTTCATCTATCTGTTTATAACATATATGTTAAGTGTACTTGGG

AATCTGATCATCATTTCTCTCATCTTGGTGGATTCTCACCTAAAAACAGCTATGTATTTT

TTTCTTCAAAATTTCTCCCTCTTAGAAATCTTAATGACAACTGCGTGTGTCCCCAGATAC

CTGCATATCTTATTAACTGGGGATAGAGCCATTACCGTTAAAGCATGTTTCAGCCAATTA

TTTTTTGTTATCCTCTTTGCAGCTACAGAATTTTTTCTCTTGGTTGTCATGTCCTATGAC

CGCTATGTGGCCATCTGCAAACCCCTGTATTACATGATCATCACGCATGACAGAATCTGC

AGGATTCTCATCCTCTGTTGTTGGGTGTTTGGCTTATTGATTATCCTCCCACCCCTTGGT

TTGAGCCTCCATCTTGAATTTTGTGACTCTGTTATTGACCATTTTTACTGTGATGCTTCT

CCAATACTGAAGAATTCATGTTCAGACACATGGTTTATAGAGCAGCTGGTTATAGTCGGT

GCTGTGCTAACCTTCGTAATGAATCTTGTGTGTATAGTTCTTTCCTACATATTAATCATT

AAGACCATTCTAAGATTACCCTCTGCCCAGCAAAGGAACAAAGCATTTTCTACTTGTTTT

TCCCACATTATTGTGGTTTCTATGACTTACGGCAGCTGCATATTCATCTATATCAAACCT

TCAGCCAAGGATGAGGTGGCCATTAATAAGATAATTTCTCTCTTCCCTACATCTGTTGCT

CCTTTGTTGAATCCCTTCATTTATACCCTGAGAAATAAACAAGTAAAGCAGTCTTTCAAT

GACATCCTTAAAAGACTTGCATTTCTTTCAAAGAAGTAG

>LoafORs2.182

ATGAAAAACCAGACTTCTTTGACTGAGTTTGTCCTACTGGGATTTACAGACAACCCAGAG

CTTCAGGCCATGGATTTCATCTTCCTGTTCCTCACCTACATATTCAGTGTCATGGGCAAC

CTGACAATCATCACCCTCACCCTGCTGGACTCCCATCTCCAGAACCCTATGTATTTCTTC

CTATGGAATTTCTCCTTCTTAGAAATTTCTTTCACTACTATTTTCATTCCAAGATTCCTG

AGCAGCATCCTGACAGGAAATAATACCATCAGCTTTGCTGGCTGCTTCACTCAGTATTTC

TTTGCCATATTCCTCGGGGCCACAGAGTTTTACCTCCTGGCTGCTATGTCCTATGACCGC

TATGTGGCCATCTGCAAACCACTGCATTACACAACCATCATGAACAGGAGAGCCTGCACC

CAGCTGGTTCTCTGCTCTTGGCTGAGTGCTTTTCTAATCATCTTATCCCCCATCATCCTG

ACCAGCCAACTAGATTTCTGTGCCTCCAACGTGCTGAATCATTTTTACTGTGACAATGGA

CCACTCATGGAGATCTCCTGTTCAGACACCAGTCTCTTGGAGTTGGTTGACTTTATCTTA

GCTTTTGGGACCTTAGTGGTTACCCTGGTGCTGGTAATGCTTTCATACACTTACATCATC

AAAACAATTCTGAAGATTCCATCAGCACAACAAAGAAAAAAGGCCTTTTCCACATGTTCT

TCCCATGTGATTGTCATCTCCATCTCTTGTGGTAGCTGCTTCTTCATTTACATTAAGCCC

TCAGCAAAAGAAGGAATTACTTTCAACAAGGGAGTAGCAGTGCTGATTACTTCTGTTGTT

CCCCTATTGAATCCCTTCATTTATACCCTACGGAACCAAGAAGTGAAAAAAGCCTTCAAG

GGTATGGTCAGAAAAATTGTGAGTCTTTACTGCCACATAGAATTCATCCCATAA

>LoafORs2.183P

TTTGCATTTCTGTTCATCACCTATTTGCTCAGCACCATTGGAAATATGGCGATCGTCAGC

CTCACCTTGCTGGATTTCCACCTTCAGACCCCTATGTATTTCTTTCTCCGGAACTTCTCT

TTCTTAGAAATTTCCTTCACAAACATCATTCCCAGGGTCTTGATCAGCATCACAACAGGG

AACAGGAGTATCAGCTTTGCTGGCTGCTTCACTCAGTATTTCTTTGCCATTTTCCTTGGG

GCAAAGGAGTTTTATCTTCTGGCTGCAACGTCCTATGATCGCTACGTGGCCATCTGCAGA

CCCCTGCATTACACGACCATTATGAACAGCAGAATCTGTACCCAGCTGGTTCTCTGCTCT

TGGCTGGCTGGGTTAATGATTATTATACCACCTATCACCCTAATGAGTCAGCAGGACTTT

AGTGCATCCAACAGGCTGAATCATTATTTCTGTGACTTTGAGCCCCTTCGGGAACTCTCC

TGTTCAGACACGAGCCTTGTAGAGAAGGTTGTCTTTCTTGTGGAATCTGTGACCCTGGTG

CTCACTCTGGTGCTAGTGATTCTCTCCTATGCATTCATCATCAGGACTATTCTAAAGCTC

CCCTCTGCCTAGCAAAGGACAAAAGCCTTTTCCACTTGTTCTTCCCACATGATTGTCATC

TCCCTCTCTTATGGAAGCTGCTTTTTCATTTATGTTAAGCCCTCAGCAAAAGAAAGGGAC

ACATTCAACAAAGGAGTAGCTCTACTGATTACCTCAGTTGCCCCTTTATTGAACCCCTTT

ATTTACATCCTAAGGAACCAGCAGGTAAAACAAGCTTTCAAGGATGCCATCAAAAAGCTT

GTGAATCTT

>LoafORs2.184

ATGATGAGAAACCACTCAGCAATAACAGCATTCACCATGCTGGGATTTACAAATGACCCA

CAACTACAGATTTTGATTTTCATCTATCTCTCTATCACATATATGTTAAGTGTACTTGGC

AATCTGATCATCATTTCTCTCATCTTGGTTGATTCTCACCTGAAAACAGCTATGTATTTT

TTTCTTCAGAATTTTTCGCTCTTAGAAATCTTAATGACAACTGCGTGCGTCCCTAGATAC

CTGCACATCTTATCAACTGGTGATAGAGCCATTACTATCAAAGCCTGTTTCAGCCAATTG

TTTTTTGTTGTTCTCTTTGCAGCTACAGAATTTTTTCTCTTGGTTGTTATGTCCTATGAC

CGCTATGTGGCCATCTGTAAACCCTTGTATTACATGATCATCATGCATGACAGAGTCTGC

AGGATTCTCATCCTCTCTTGTTGGGTGTTTGCCTTATTGATTATCCTCCCACCCCTTGGT

TTGAGCCTCTGTCTTGAATTTTGTGACTCTATCATTGACCATTTTTACTGTGATGCTTCT

CCAATACTGAGGAATTCATGTTCAGACACATGGTTCATAGAGCAGTTGGTTATAGTCGGT

GCTGTGCTTATCCTCATAATGAATCTTGTGTGTATAGTTCTTTCCTACATATTAATCATT

AAGACCATTCTGAGATTACCCTCTGCCCAGCAAAAGAACAAAGCATTTTGTACTTGTTTT

TCCCACATTATTGTGGTTTCTATGACTTATGGCAGCTGCATGTTTATCTATATCAAACCT

TTGGCAAAGGAGGGGGTAGCCATTAATAAGATAGTTTCTCTGCTCCCTACATCTGTTGCC

CCTTTGTTGAACCCCTTCATTTATACCCTTAGAAATAAACAAGTAAAGCAGTCTTTCAAT

GACATCCTTAAAAGACTTGAATTTCTTTCCAAGTAG

>LoafORs2.185

ATGAAAAACCAGACTTCATTGACTGAGTTTGTCCTACTGGGATTTACAGACAACCCAGAG

CTTCAGGCCATGGTTTTCATCTTCCTGTTCCTCACCTACATATTCAGTGTCATGGGCAAC

CTGACAATCATCACCCTCACCCTGCTGGACTCCCATCTCCAGACCCCTATGTATTTCTTC

CTACGGAATTTCTCCTTCTTAGAAATTTCTTTCACTACTATTTTCATTCCAAGATTCCTG

AGCAGCATCCTGACAGGAAATAATACCATCAGCTTTGCTGGCTGCTTCACTCAGTATTTC

TTTGCCATATTCCTCGGGGCCACAGAGTTTTACCTTCTGGCTGCCATGTCCTATGACCGC

TATGTGGCCATCTGCAAACCACTGCATTACACAACCATCATGAACAGAAGAGCCTGCACC

CAGCTGGTTCTCTGCTCTTGGCTGAGTGGTTTCCTAATCATCTTATCCCCCATCATCCTG

ACCAGCCAACTAGATTTCTGTGCCTCCAACGTGCTGAATCATTTTTATTGTGACTATGGG

CCCCTCATGGAGATCTCCTGTTCAGACACCAGTCTCTTGGAGCTGATTGACTTTATCTTA

GCTATTGTGACCTTGGTGGTTACCCTGGTGCTGGTAATGCTTTCATACACTTACATCATC

AAAACAGTTCTGAAGATTCCATCAGCACAACAAAGAAAAAAGGCCTTTTCCACATGTTCT

TCCCATGTGATTGTCATCTCCATCTCTTATGGCAGCTGCATCTTCATTTACATTAAGCCT

TCAGCAAAAGAAGGAGTTGCCTTCAACAAGGCAGTAGCAGTGCTCATTACTTCTGTTGCT

CCCCTATTGAATCCCTTCATTTATACCCTACAGAACCAACAAGTGAAAAAAGCCTTCAAG

GATACGGTCAGAAAAATTGTGAGTCTTTAA

>LoafORs2.186P

ATGAAAAATAAAACTATGGTAATGGAGTTCATCCTGCTGGGTCTAACAGATGTCCCTGAA

CTCCAGGTAGCACTTTTCGCCTTTCTGCTCATCGCCTATTTGCTCAGCATCATTGGAAAT

CTGACTATCCTCATCCTCACATTGCTGGATCTCCACCTTCAGACCCCTATGTATTTCTTT

CTCTGGAACTTCTCCTTCTTAGAAATTTTCTTCACAAACAACATCATTCCCAGGGTCCTG

ATCAGCATCACAACAGGGAATAAGAGTATTAGCTTTGCTGGCTGCTTCGGTCAGTATTTC

TTTGTCATCTTCCTTGGGGCAACGGAATTTTATCTTCTGGCCGCCATGTCCTATGATCGC

TACGTGGCCATCTGCAAACCCCTGCATTACATGACCACTATGAACAGCAGAGTCTGCGCC

CAGCTGGTTCTCTGCTCTTGGCTGGCTGGGTTAATGATTATTAGACCACCTATCACCCTA

ATGAGTCAGCAGGACTTTTGTGCATCCAACAGTCTGAATCATTATTTCTGTGACTTTGAG

CCCCTTCGGGAACTCTCCTGTTCAGACACGAGCCTTGTAGAGAAGGTTGTCTTTCTTGTG

GCATCTGTGACCCTGGTGCTCACTCTGGGGCTAGTGATTCCCTCCTATGCATTCATCATC

AGCACTATTCTGAAGTTCCCCTCTGCCCAGCAAAGAACAAAAGCCTTTTCCACTCGTTCT

TCCCACATGATTGTCATCTCCCTCTCTTATGGAAGCTGCTTTTTCATTTATGTTAAGCCC

TCAACAAAAGAAGGGGACATATTCACAAGG

>LoafORs2.187P

GTCTACCTCATACATATATTAAGTGTACTTGGGAATCTGATCATCATTTCTCTCATCTTG

GTGGATTCTCACCTAAAAACAGCTATGTATTTTTTTCTTCAAAATTTTTCCCTCTTAGAA

GTCTTAATGACAACTGTGTGTATCCCCAGATACCTGCACATCTTATCAACTAGGGATAGA

ACCATCACCGTCAAAGCCTGTTTCAGCCAAGTGCTTTTTGTTGTCCTCTTTGCAACTACA

GAATTTTTTCTCTTAGCCATCATGTCCTATGACTGCTATGTGGCCATCTGCAAAACCCTG

CATTACATGATCATGATGCATAACAAAATCTGCAGGATTCTGGTCCTCTGTTGTTGGGTG

CTTGCTTTATTTATTATCTTCCCACCTCTTGGTTTGAGCCTTCATCTTGAATTTTGTGAC

TCTGTCATTGACCATTTTTACTGTGATGCTTCTCCAATACTGAAGAATGCATGTTCAGAT

ACATGGTTCGTAGAGCAGCTGGTTATAGTTAGCGCTGTGCTGACCTTCATAATGAATCTT

GTGTGTATAGTTCTCACCTATGTATTCATCATCAGGGCCATTCTAAGATTACCTTCTGCC

CATCAAGGGAAAAAAGCATTTTGTACTTGTTCTTCCCACATGATTGTGGTTTCTATGACT

TATGGCAGCTGTATATTCATCTATATCCAACCTTCAGCAAAGGAGGCGGTAGCCATTAAT

AAGGTAGTTTCTCTGCTCCCTACATCTGTTGCCCCTTTGTTGAACTCCTTCATTTATACC

CTTAGAAATAAACAAGTAAAGCAGTCTTTCAATGATATCCTTAAAAGACTTGCATTTCTT

TCAAAGAAG

>LoafORs2.188

ATGGGAAGAGCATGCAATAGTGTGAAGTCAGCGATGAGAAACCACTCTGCAATAACAACA

TTCACCATACTGGGATTGACAAATGACCCACAACTACAGATTTTGATTTTCATCTACGTG

TTTATCACATATATGTTAAGTGTAATTGGAAATCTGACTATCATTTATCTCATCTTGGTG

GATTCTCATCTAAAAACAGCTATGTATTTTTTTCTTCAAAATTTCTCCTTTATAGAAATC

ACATTCACAACTGCGTGTGTCCCCCAATACCTGCACATTATATCATCTGGGGATAGAACC

ATCACTGTCAAAGCATGCTTCACCCAGATATTTTTTATTGTCCTCTTTGCAGCTACAGAA

TTTTTTCTCTTGGCCGTCATGTCCTATGACCGCTATGTGGCCATCTGCAAACCGCTGCAG

TACGTGACCATCATGAATAACAGAGTCTGCAGGATTCTCATCCTCTGTTGTTGGGTGTCT

GGACTATTGATTATCCTTCCATTCCTTAATTTGAGCCTCCATCTGGAATTTTGTGACTCT

GTCATCGACCATTTTTACTGTGATGCTTCTCCAATACTGAAGAATTCATGTTCAGATACA

TGGTTCATAGAGCAGGTTGTTATAGTCTGTGCTCTGGTGACCTTCATAATGACCCTTGTG

TGTGTAGTTCTGTCCTACATGTATATTATTAGGATGACTCTACAATTTCCCTCTGCCCAG

CAAAGGAAGAAAGCCTTCTCCACCTGTTCATCGCACATGATTGTGGTTTCTGTCACCTAT

GGCAGCTATATATTCATCTATATCAACCCTTCAGCAAAGGATGAAGTGGCCATTAATAAG

GCAGTTTCTCTGCTTGCTACATCTGTTGCCCCTTTGTTGAACCCCTTCATTTACACCCTG

AGAAATAAGCAAGTAAAGCAGTCTTTCAATGACATCCTCAGAAGATTTGCATTTCTTTCA

AAGAAGGAATAG

>LoafORs2.189

ATGAAAAACCAGACCACATTTACTGAGTTTATCCTATTGGGCCTCACAAATCAACCTGAA

CTCCAGGTGGTAATATTTATCTTTCTGTTCCTCACCTACATGCTAAGTGTCATAGGGAAT

CTGACCATCATCGCCCTCACCTTACTAGACCCCCATCTCCAGATGCCCATGTATTTCTTC

CTCCGGAATTTCTCCTTCTTAGAAATTTCCTTTACCTCTATTTTTATTCCTAGATTTCTG

ACCAGCATGGCAACAGGAAATAAAGTCATCAGCTTTGCTGGCTGCTTGACTCAGTATTTT

TTTGCTATATTCCTTGGGCCAACAGAGTTTTACCTTCTGGCCTCTATGTCCTATGACCGC

TATGTGGCCATCTGCAAACCCCTGCATTACCTGACCATCATGAGCAGCAGAATCTGTATA

CAACTAGTGTTCTGCTCCTGGCTGGGGGGATTCCTAACCATCTTACCCCCAATCATCCTG

ATGAGCCACGTGGATTTCTGTGTCACCAATATTCTGAATCACTATTATTGTGACTATGGA

CCCCTCATGGAGCTCGCCTGCTCAGACACAAATGTCTTAGAACTGATGGTCATCCTCTTG

GCAGTTGTGACTTTGGTGGTGACCCTGGTGCTGGTGACACTTTCTTACACATACATTATA

AGGACCATTCTGAGGATCCCTTCTGCCCAGCAAAGGACAAAGACCTTTTCCACTTGTTCC

TCCCACATGATCGTCATCTCCCTCTCTTATGGCAGCTGCATGTTTATGTATATTAATCCC

TCTGCAAAAGAGGTAGGTTCTTTCAACAAAGGAATAGCTGTGCTCATTACTTCAGTTACC

CCTTTGTTGAACCCCTTCGTTTATACTCTAAGAAATCAGCAAGTGAAGCAAGCCTTCAAG

GATACTGTCAAAAAAATTGTGAAGGTTTAA

>LoafORs2.190

ATGAGAAACCGGTCAGCAATAACAACATTCATCATACTGGGACTGACAGATGACCCACAA

CTACAGATTCTGGTTTTCATCTTTCTGTTTATCACATATATGTTAAGTATAATTGGGAAC

CTGACTATTATTTTTCTCATCTTGGTGGATTCTCATCTAAAAACAGCCATGTATCTTTTT

CTTCAAAATTTCTCCTTTTTAGAAATCTCATTCACGACAGCATGCGTCCCCCCATATCTG

CACATCATATCAACTGGGAATAGAACTATCACCATCAAAGCATGCTTCACCCAGATATAT

TTTATTGTCCTCTTTGCAGCTACAGAATTTTTTCTCTTGGCTGTCATGTCCTATGACCGC

TATGTGGCCATCTGCAAACCCCTGTATTATGTGACCATCGTGAATAGCAGAGTCTGCAGG

ATTCTCATTCTCTGCTGTTGGGTGTCTGGCTTATTGATTATTCTTCCACCACTTGGTTTG

AGCCTCCATCTGGAATTCTGTGACTTTGTCATTGACCATTTTATCTGTGATCCGCTTCCA

TTACTGAAGAATTCATGTTCAGATACACGGTTCATAGAGCAGCTGGTTAGAGTCTGTGCT

GTGCTGACCTTCATAATGACACTTATGTGTGTAGTCCTATCTTACATATATATCATTAAG

ACCATTCTAAGATTGCCCTCTGTCCAGCAAAGGAAAAAAGCCTTTTCTACCTGTTCTTCC

CACATGATTGTGGTTTCTATCTCCTACGGCAGCTGTATATTTATGTATATTAAACCTTTG

TCAAAGGATGAAGTGGCCATAAATAAGGCAGTTTCTCTGCTCAATACATCTGTTGCCCCT

TTGTTGAACCCCTTCATTTATACACTGAGAAACAAACAAGTGAAGCAGTCTTTCAAGGAC

ATCCTCAAAAAATCTGCATTTTTTTCAAAGAAATAG

>LoafORs2.191

ATGAGAAACCACTCCGCAATAACAACATTCACCGTACTGGGATTGACAAATGACCCACAA

CTACAGATTTTGATTTTCATCTACCTGTTTATCACATATATGTTAAGTATAATTGGAAAT

CTGACTATCATTTATCTCATCTTGGTGGATTCTCATCTAAAAACAGCTATGTATTTTTTT

CTTCAAAATTTCTCCTTTATAGAAATCACATTCACAACTGCATGTGTCCCCCAATACCTG

CACATTATATCATCTGGGGATAGAACCATCACTGTCAAAGCATGCTTTACCCAGATATTT

TTTATTGTCCTTTTTGGAGCTACAGAATTTTTTCTCTTGGCCATCATGTCCTATGACCGC

TATGTGGCCATCTACGAACCGCTGCAGTACGTGACCATCATGAATAACAGAGTCTGCAGG

ATTCTCATCCTCTGTTGTTGGGTATCTGGATTATTGATTATCCTTCCATTCCTTAATTTG

AGCCTCCATCTGGAATTTTGTGACTCTGTCATTGACCATTTTTACTGTGATGCTTCTCCA

TTGCTGAAGAACTCATGTTCAGATACATGGTTCATAGAGCAGGTTGTTATAGTCTGTGCT

GTGGTGACCTTCATAATGACCCTTGTGTGTGTGGTTCTGTCCTACATATTCATCATTAAG

ACGATTCTAAGATTGCCCTCTGCCCAGCAACGTAAGAAAGCTTTTTCCACCTGTTCTTCC

CACATGATTGTCGTTTCTATCTCCTATGGCAGCTGCATATTTATATATATCAAACCTTCG

GCAAAGCATGAAGTGGCCATAAATAAGGCAGTTTCTCTACTCGCTACATCTGTTGCCCCT

TTGTTGAACCCCTTCATTTATACCTTGAGAAATAAACAAGTAAAGCAGTCTTTCAATGAC

ATCCTCAAAAGATTTGCATTTCTCTCAAAGAAGGAATAG

>LoafORs2.192P

ATGAAAAACCAGACCACATTTACTGAATTTATCCTGCTGGGCCTTACATTTCAACCTGAA

CTCCAAGTGGTGATATTCATCTTTCTGTTACTTGCCTACATGCTGAGTGTCCTAGGAAAT

TTGGCCATCATCATACTCACTGTCATTGATCCCCACCTCAAGACCCCAATGTATTTCTTT

CTGCGGAATTTCACCTACTTAGAAGTTTCCTTCACAACCATTTTCATTCCCAGATTGTTG

ACCAGCTTGACAACAGGAAATAAGGTCATCAGCTTTACCGGATGCTTGACTCAGTATTTT

TTTGCTATATTCCTTGGAGCAACAGAGTTTTACCTCCTGACCTCTATGTCGTATGACCGC

TATGTGGCAGTCTGTAAACCCCTGCATTACTTGACCATCATGAACAGCCAGGTCTGCATA

TGACTCGTGTTTTGCTCCTGGATGGCAGGAGTTCTGACTGTCTTATCCCCAATTATCCTG

ATAAGCCAGTTGGATTTCTGTGCCTCCAATGTGCTGAATCAATATTACTGTGACTATAGA

CCCCTTGTGGAGATCGCCTGCTCAGACACAAGCCTCTTACAACTGATAGTCATCCTCTTA

GCTGTTTTGACTCTGGTGGTGACTCTGGTGGTGACTCTGGTGCTGGTGATACTTTCTTAT

ACACACATTATCAGGACCATTCTGAGGATCCCTTCTGCCCAGCAACGGACAAAGGCCTTC

TCCACTTGTTCCTCCCACATGATTGTCATCTCTCTTTCTTATGGCAGCTGCATCTTTTTG

TACATTGGCCCATCAGCAAAGAAAGGAGGTAACTTTGACAAGGAAGTGTCTCTACTCATG

ACCTCAGTTAGTCCCTTGTTGAACCCCTTTATTTACACCTTAAGGAATCAGCAGGTAAAG

CAAGCTTTCAAGAACACAGTAAAAAAGATTGTGAAGTTT

>LoafORs2.193

ATGAAAAACCGGACCAAATTTACTGAGTTTATCCTGCTGGGTCTCACAAATCAACCTGAA

CTCCGGGTGGTGATATTCATCTTTCTGTTACTTGCCTACATGCTGAGCGTCCTAGGAAAT

CTGACCATCATCATACTTACTCTGGTAGATCCCTACCTCAAGACCCCAATGTATTTCTTT

CTCCAGAATTTCTCCTACTTAGAAATTTCCTTCACATCTACTGTCATTCCCAGATTGTTG

ACCAGCTTGACAACAGGAAATAAGGTCATCAGCTTTGCTGGCTGCTTGACTCAGTACTTT

TTTGCTATACTCCTCGGGGCAACAGAGTTTTACCTCCTGGCCTCTATGTCGTATGACCGC

TATGTGGCCATCTGTAAGCCCCTGCATTACCTGACCATCATGAACAGCCAGGTCTGCATA

CAGCTGGTGTTCTGCTCCTGGATGGGAGGAGTCCTGGCTGTCTTACCCCCAGCTATCCTG

ATAAGCCAGATGGATTTCTGTGCCTCCAATGTGCTGAATCATTATTACTGTGACTATAGA

CCCCTTGTGGAGATCGCCTGCTCAGACACAAGCCTCTTACAACTGATAGTCATCCTCTTA

GCTGTTTTGACTCTGGTGGTGACTCTGGTGCTGGTGATACTTTCTTATACACACATTATC

AGGACCATTCTGAGGATCCCTTCTGCCCAGCAAAGGACAAAGGCCTTCTCCACTTGCTCC

TCCCACATGATTGTCATCTCCCTTTCTTATGGCAGCTGCATCTTTTTGTACATTGACCCA

TCACCAAAGAAAGGAGGTAACTTTGACAAGGAAGTGTCTCTACTCATGACCTCAGTTAGT

CCCTTGTTGAACCCCTTTATTTACACCTTAAGGAATCAGCAGGTAAAGCAAGCTTTCAAG

AACACAGTAAAAAAGATTGTGAAGTTCTAA

>LoafORs2.194

ATGAAAAATTATACAGCGATAACAACATTCATCCTGGTGGGACTAACAGATGACACAAAT

CTACAGATTCTGCTTTTTATCTTTTTGTTCCTAACATATTTGTTGAGTGTTGTTGGGAAT

CTAACCATCATCACTCTCACCTTGGTGGATTCTCACCTTAAAACACCCATGTATTTTTTT

CTCCGGAATTTTTCCATCTTAGAAGTCTCATTTACAACTGTCTGCATTCCCAGATTTCTC

TACACAATGGCATCTGGGGACAATACTGTTACTTACAATGCATGTGCCACTCAATTATTT

TTTGTTGTTGTCCTGGGCGTGACTGAGTTTTTTCTCCTGACTGCCATGTCCTATGACCGT

TACGTAGCCATCTGCAAGCCCCTGCATTACACAACCATCATGAGCAACAGAGTCTGCATC

AGGTTCCTTATTGGCTGTTATATAATTGCTCTAATCATTGTCATCCCACCATTTGGCATG

GGCTTTGAGCTCGAGTTTTGTGACTCCAATGTCATAGACCACTTTGCCTGTGATGTTGCT

CCTATCCTGAAGATCACCTGCTCCAACACAGAGTTTATAGAGCGGTTTGTCTTAATTCTG

GCTGTGTTGATCCTCCTTTTCACTTTGGTGTGTGTGATTATGTCCTACGCATACATCATC

AAGACTATTCTCAGATTCCCTTCTGCCCAGCAACAGAAAAAGGCTTTTTCTACTTGCTCG

TCCCATATAATTGTGGTTTCTATCACTTATGGAAGCTGCATCTTCATCTATGTTAAGCCA

TCTGCAAAGGAAGGGGTAGCTATTAATAAGGTGGTGTCAGTACTTACTACCTCAGTTGCC

CCAGTAATGAATCCCTTCATTTATACTCTGAGAAACAAGCAAGTGGCTCAAGCTTTTAAA

GACCTGATCAAAAAGGTTGCATCTATCTCAAAGAACTAA

>LoafORs2.195P

ATAACAACATTCATGTTTCTGGGATTGACAGATGACCCAAAGCTACAAGTTCTGCTTTTT

ATATTTTTGTTCCTCACCTACATGTTGAGTGTTACTGGGAACCTAATAATCATTGCCTTC

ACGCTTTCGGATTCCCATCTTAAAACTCCCATGTATTTTTTCCTGCGAAATTTCTCTTTC

TTAGAAGTCTCATTCACCTCTGTCTGTATTCCCAGATTCCTGTATGCTATGACAACTGGA

GATAATACTGTTACCTATAATGCTTGTGCCACCCAAATGTTGTTTGTTGTCCTCTTTGGA

GTAACAGAATTTTTTCTTCTGGCAGCCATGTCCTATGATCACTATGTGGCCATCTGCAAA

CCCCTGCATTACACGACCATCATGAACAATACAGTCTGCACTACACTCATTCTCAGCTGT

TGGGTTGCTGGCCTATTGATCATCCTCCCACCACTTGGCATAGGGCTCCAGCTGGAATTC

TGTGACTCAAGTGTAATTGATCATTTTGCTTGTGATACATCTCCTATTCTCCAGATAACC

TGCTGAGACACAGTATTTATGGACAGAATTGTTTTGAGTTTTGGTGTGCTGACGCTTATT

ATTACCCTAGTGTGTGTAGTCCTCTCCTACACGTACATCATTAAGACCATCCTAAAATTC

CCTTCTGCTCAACAAAGGAAAAAGGCCTTTTCCACCTGTTCTTCCCATATAATTGTCATT

TCCATCACCTATGGCAGCTGCATGTTCATCTGTATCAAACCTTCAGCAAAGGAAGGAGTG

GCCATTAGTAAGGTGGTGTCGGTGCTCACTACTTCAGTTGCTCCTTTGCTTAACCCGTTC

ATTTATACACTTAGAAACAAACAAGTGAAACAAGCTTTCAAAGACATCATAAAAAGGATT

ACATTTCTCACAAAGAAG

>LoafORs2.196

ATGAGAAATCGTTCTGCAATAACAAAATTCATCCTGCTAGGACTAACAGATGACCCACAA

CTACAAGTTTTTCTAACAGTATTTCTGTTTCTTACCTACATTTTCACCGTTGCTGGAAAT

CTAATCATTATCCTCCTCACACTGGTGGACGTTCACCTCAAAACACCCACGTACTTTTTC

CTTCGCAATTTCTCCATCTTAGAAATAATATTTACAACTGTCTGTGTTCCCAGATTCCTG

TACAGCATGACAACTGGGGACAAAAGTGTCACCTACAATGCTTGTGTAGTCCAATTATTT

TTTGTCATCCTCGTTGGGGCAGCAGAATTCTTTCTTCTAACTGCCATGTCCTATGACCGC

TACGTGGCCATCTGCAAGCCTCTGCACTACACCACCATCATGAATGACAGGGTGTGCACC

ATATTTGTCCTTGGCTGTTGGCTGACTGGGTTACTTGTCATACTCCCACCGCTTAGCCTG

GGAGTTCAGCTAGATTTCTGTAACTCCAATCTCATTGACCATTTTGGCTGTGATGCATCC

CCTCTTCTGAAGATTGTATGCTCAGACACACAATTTGTAGAACATATTGTTTTAACCATG

GCTGTGCTAACCCTCATATTCACACTAGTGTGTGTAATTGTATCCTATACATACATAATC

AAGACCATCTTAAGACTGCCTTCTACTCAGCAAAGAAAAAAGGCTTTCTCTACTTGTTCT

TCCCATGTGATTGTAGTTTCCCTCACCTATGGAAGTTGCATCTTCATCTATATCAAACCA

GCAAAGGAAGGAGTGGCCCTTAATAAGGTGGTATCACTGCTCAACACCTCATTTATCCCT

TTGATGAACCTTTTCATTTACACTCTATGA

>LoafORs2.197P

ATGACAAATCACACAGTGATAACAACATTCATCCTGCTGGGGATGACGGAGGACCCAAAA

TTACAAATCCTACTTTTGGTATTTTTATTTCTCACCTACCTTTTGTGTGTGGCTGGGAAC

ATGGCAATTATCACTCTCACACTTTTGGATTCCCATCTTCAAACTCCCATGTATTTTTTC

CTCCGAAATTTCTCTTTCTTAGGAGTCTCATTCACCTCTGTCTGTATTCCCAGATTCCTG

TACAGCCTGACAACTGGAGATAAAACTTGTACCTATAATGCTTGTGCCACGCAATTGTTT

TTTGTTATCCTCTTTGGAGCAACTGAGTTTTTTCTCTTTGCTGCCATG

>LoafORs2.198P

ATGACAAATCACACAGTGATAACAACATTCATCCTGCTGGGGATGACGGAGGACCCAAAA

TTACAAATCCTACTTTTGGTATTTTTATTTCTCACCTACTTTTTGTGTGTGGCTGGGAAC

ATGACAATTATCACTCTCACACTTTTGGATTCCCATCTTCAAACTCCCATGTATTTTTTT

CTCCGAAATTTCTCTTTCTTGGAAGTCTCATTCACCTCCGTCTGTATTCCCAGATTCCTG

TACAGCCTGACAACTGGAGATAAAACTTGTACCTATCATGCTTGTTTCACACAATTGTTT

TTTGGTATCCTCTTTGGAGCAACTGAATTTTTTCTCCTTGCTGCCATGTCCTATGATCGC

TACGTGGCCATCTGTAAGCCCCTACATTACACAACCATCATGAACAACAAGTTCTGCACT

ACACTCCTTCTCTGCTGTTGGATTGCTGGCCTGTTGATTATTGTCCCCCCTCTTGGCATG

GGTCTCCAGCTGGAATTCTGTGACTCAAATCTCATTGATAGTTTTGTTTGTGACGCATAT

CCTATCCTACAGATCACCTGTTCAGACACAGAACTTATAGAAAAGGTTGTTTTGGCTTTT

GCTGTGCTAACACTGATTACTACCCTACTGGGTGTGCTTCTCTCCTACACATACATCATC

AGCACCATTCTAAAATTCCCTTCTACCTAACAAAGGATAAAGGCCTTTTCCACCTGTTCT

TCTCACATGATTGTGGTTTCCATGAGCTATGGCAGTTCCATCTTCGCCTACATTAAACCT

TCAGGAAAGGAAGGAGTAGCCCTTAATAAGGTGGTGGCACTGCTCTTTACTTCAGTTGCC

CCTATGCTTAACCCTTTCATTTATACACTACGAAACAAGCAGGTAAAGGAAGCCTTCAAA

GACACCGTAAAAAGGATTGCATTTCTCATAAAGAAG

>LoafORs2.199

ATGAGAAATCATACCGCCATAACAACATTCATCCTGCTGGGGCTGACAGATGACCCAATT

CTACAGATTGTGCTTTTGATATTTTTCTTTCTCACCTACATTTTGAGTGTAACTGGGAAC

CTGACAATTATCACCCTCACACTTTCAGATTCTCACCTTAAGACTCCCATGTATTTTTTC

CTCCGAAATTTCTCTTTCTTGGAAGTGTCATTCACCACTGTCTGTGTGCCCAGATTTCTG

TACACCCTGACAACTGGAGACAAAACAATTACCTATAATGCTTGTGCCACACAGATGTTT

TTTGTTGTCCTCTTTGGAGTCACCGAATTTTTTCTCCTTGCTGCCATGTCCTATGATCGC

TATGTGGCCATCTGTAAGCCCCTGCATTATACAACCATCATGAACAGTAAGGTCTGCACT

ACCCTTCTTCTCTGCTCCTGGTTTGCTGGCCTGTTGATCAGCCTCCTACCTTTTAGTATG

GGTCTCCAGCTGGAATTCTGTGACTCAAATCTCATTGATAGTTTTGGCTGTGATACATAT

CCTGTTTTACAGATATCCTGCTCAGACACAATGCTTATAGAAAAAAATGCCTTGGGTTTT

GCCGTGGTAACACTAATTATTACCCTAATTGGTGTGGTTCTTTCATACACATACATTGTC

AAGACCATTCTAAAATTCCTTTCTGCCCAACAAAGAAAAAAGGCCTTTTCTACATGTTCT

TCTCACATGATTGTGGTTTCCATGACCTATGGCAGCTTCATCTTCATCTACATCAAGCCT

TCAGCAAAGGAAGGAGTGGCCCTTAATAAGATGGTGTCAATGCTAGCCACTTCTGTTGCC

CCTTTGCTTAACCCATTCATTTATACACTTTGA

>LoafORs2.200

ATGACAAATCACACAGTGATAACAACATTCATCCTGCTGGGGATGACGGAGGACCCAAAA

TTACAAATCGTGCTTTTGGTATTTTTATTTCTCACCTACTTTTTGTGTGTGGCTGGGAAC

ATGGCAATTATCACTCTCACACTTTTGGATTCCCATCTTCAAACTCCCATGTATTTTTTT

CTCCGAAATTTCTCTTTCTTAGAAGTCTCATTCACCTCTGTCTGTACTCCCAGATTCCTG

TACAGCCTGACAACTGGAGATAAAACCTGTACCTATAATGCTTGTTTCACACAATTGTTT

TTTGGTGTCCTCTTTGGAGCAACTGAGTTTTTTCTCCTTGCTGCCATGGCCTATGATCGC

TACGTGGCCATCTGTAAGCCCTTACATTACACAACCATCTTGAACAACAAGTTCTGCACT

ACACTCCTTCTCTGCTGTTGGATTGCTGGCCTGTTGATTATTGTGCCCCCTCTTTGCATG

GGTCTCCGGCTGGAATTCTGTGACTCCAATCTCATTGATAGTTTTGCTTGTGACGCATAT

CCTATTCTACAGATCACCTGTTCCAACACAGAGCTTATAGAAAAGGTTGTTTTGGCTTTT

GCTGTGCTAACACTGATTACTACCCTACTGGGTGTGCTTCTCTCCTACACATACATCATC

AGCACCATTCTAAAATTCCCTTCTGCCCAACAAAGGAAAAAGGCCTTTTCCACCTGTTCT

TCTCACATGATTGTGGTTTCCATGAGCTATGGCAGTTCCATCTTCGCCTACATTAAACCT

TCAGGAAAGGAAGGAATAGCCCTTAATAAGGTGGTGGGGCTGCTCTTAACCTCAGTTGCC

CCTATGCTTAACCCTTTCATTTATACACTACGAAACAAGCAGGTAAAGGAAGCCTTCAAA

GACACAGTAAAAAGGATTGCATTTCTCATGAATAAGTAA

>LoafORs2.201

ATGACAAATCACACAGTGATAACAACATTCATCCTGCTGGGGATGACGGAGGACCCAAAA

TTACAAATTGTGCTTTCGGTATTTTTATTTCTCACCTACTTTTTGTGTGTGGCTGGGAAC

ATGACAATTATCACTCTCACACTTTTGGATTCCCATCTTCAAACTCCCATGTATTTTTTT

CTCCGAAATTTCTCTTTCTTAGAAGTCTCATTCACCTCCGTCTGTATTCCCAGATTCCTG

TACAGCCTGACAACTGGAGATAAAAAATGTACCTATAATGCGTGTGCCACGCAATTGTTT

TTTGGTGTCTTCTTGGGAGCAACTGAGTTTTTTCTCTTTGCTGCCATGTCCTATGATCGC

TACGTGGCCATCTGTAAGCCCCTACATTACACAACCATCATGAACAACAAGTTCTGCACT

ACACTCCTTCTCTGCTGTTGGGGTGCTGGCCTGTTGATTATTGTGCCCCCTCTTGGCATG

GGTCTCCGGCTGGAATTCTGTGACTCTAATCTCATTGATAGTTTTGGTTGTGACGCATAT

CCTATCCTACAGATCACCTGTTCCGACACAGAGCTTATAGAAAAGGTTGTTTTGGCTTTC

GCTGTGCTAACACTGATTTCTACCCTACTGGGTGTGCTTCTCTCCTACACATACATCATC

CGCACCATTCTAAAATTCCCTTCTGCCCAACAAAGGAAAAAGGCCTTTTCCACCTGTTCT

TCTCACATGATTGTGGTTTCCATGACCTATGGCAGTTCCATCTTTGCCTACATTAAACCT

TCAGGAAAGGAAGGAGTAGCCCTTAATAAGGTGGTGGGGCTGCTCTTTACTTCAGTTGTC

CCTATGCTTAACCCTTTCATTTATACACTACGAAACAAGCAGGTAAAGGAAGCCTTCAAA

GACACCGTAAAAAGGATTGCATTTCTCATAAAGAAGTAA

>LoafORs2.202

ATGACAAATCACACAGTGATAACAACATTCATCCTGCTGGGGATGACGGAGGACCCAAAA

TTACAAATCGTGCTTTTGGTATTTTTATTTCTCACCTACTTTTTTTGTGTGGCTGGGAAC

ATGGCAGTTATCAGTCTCACACTTTTGGATTCCCATCTTCAAACTCCCATGTATTTTTTC

CTCCGAAATTTCTCTTTCTTAGAAGTCTCATTCACCTCCGTCTGTATTCCCAGATTCCTG

TACAGCCTGACAACTGGAGATAAAACTTGTACCTATAATGCTTGTTTCACACATTTGTTT

TTTGTTATCCTCCTTGGAGCAACTGAGTTTTTTCTCTTTTCTGCCATGTCCTATGATCGC

TACGTGGCCATCTGTAAGCCCCTACATTACACAACCATCATGAACAACAAGTTCTGCACT

ACACTCCTTCTCTGCTGTTGGGGTGCTGGCCTGTTGATTATTGCCCTCCCTCTTGGCATG

GGTCTCCAGCTGGAATTCTGTGACTCCAATCTCATTGATAGTTTTGCTTGTGACGCATAT

CCTATCCTACAGATCACCTGTTCAGACACAGAGCTTATAGAAAAAGTTGTTTTGGCTTTT

GCTGTGCTAACACTGATTACTACCCTACTGGGTGTCATTCTCTCCTACACATACATCATC

AGCACCATTCTAAAATTCCCTTCTGCCCAACAAAGGAAAAAGGCCTTTTCCACCTGTTCT

TCTCACATGATTGTGGTTTCCATGAGCTATGGCAGTTCCATCTTCTCCTACATTAAACCT

TCAAGAAACGAAGGAGTAACCCTTAATAAGGTGGTGGGGCTGCTCTTTACTTCAGTTGTC

CCTCTGCTTAATCCTTTCATTTATACACTACGAAACAAGCAGGTAAAGGAAGCCTTCAAA

GACACTGTAAAAAGGGTTGCATTTCTCATAAAGAAGTAA

>LoafORs2.203P

ATGAGAAATCATACCGCCATAACAACATTCATCCTGCTGGGGTTGACAGATGACCCAATT

CTACACATTGTGCTTTTGATATTTTTATTTCTCACCTACATTTTGAGTGTAACTGGGAAC

CTGACAATTATCACCCTCACACTTTCAGATTCTCACCTTAAGACTCCCATGTATTTTTTC

CTCCGAAATTTCTCTTTCTTGGAAGTGTTATTCACCACTGTCTGTGTGCCCAGATTTCTG

TACACCCTGGCAACTGGAGATAAAACGATTACCTACAATGCTTGTGCCACACAGAAGTTT

TTT/TGCCACACAGAAGTTTTTTTTGTCCTCTTTGGAGCCACCAATTTTTTTCTCCTTGC

TGCCATGTCCTATGATCGCTATGTGGCCATCTGTAAGCCCCTGCATTACACAACCATCAT

GAACAGTAAGGTCTGCACTACCCTTGTTCTCTGCTCCTGGTTTGCTGGCCTGTTGATCAG

CCTCCTACCTTTTAGTATGGGTCTCCAGCTGGAATTCTGTGACTCAAATCTCATTGATAG

TTTTGGCTGTGATACGTATCCTGTTTTACAGATATCCTGCTCAGACACAACGCTTACAGA

AAAAAATGCCTTGGGTTTTGCCGTGGTAACACTAATTATTACCCTAATTGGTGTGGTTCT

TTCATACACATACATTGTCAAGACCATTCTAAAATTCCCTTCTGCCCAACAAAGAAAAAA

GGCCTTTTCTACATGTTCTTCTCACATGATTGTGGTTTCCATGACCTATGGCAGCTGCAT

C

>LoafORs2.204P

ATGAAAAATCGGACCATGATTGAATTCATCCTGCTGGGACTAACAGACAACCCAGAGCTT

CAGACCGTAATCTTCATACTTCTCTTCCTCGCCTACATATTTAGCATCTTAGGTAATCCG

ACAATCATCACCCTCATACTATTGGACACCCATCTCCGGACTCCTATGTATTTTTTCCTC

CGGAATTTCTCCTTCTTGGAAATTTCCTTTACAACCACTTTCACTCCTAGGCTGCTGATC

AGCATCTCTACTGGGAATAAGGCCATCAGTTTTGCTGGCTGCTTCACTTAGTATTTCTTT

GCCATGTTCCTCGGAATAACAGAGTTTTACCTTCTGGCTGCCATGTCTTATGATTGCTAG

GTAGCCATCTGCAAACCCCTACATTATACAACCATCATGAACAACAGAGTCTGTATCTAG

CTGGTTCTCTGCTCTTGGTTGGGTGGGTTCCTAATCATTTTATACCCCATCATCCAGACC

AGTCAGCTGGATTTCTGTGCCTCCAATGTGCTGAATCATTAT/TTATCTTGCTCAGACAC

AAGACTCCTGGAGCTGGTTGACTTTATCTTAGCAGTTGTGACCTTGGTGGTGACCCTGGT

GCTGGTGCTTCTCTCCTACACAAATATCATCAAGACCATTCTGAAGATCCCCTCTGCCCA

GCACAGGAAAAAGGCATTTTCCACATGTTCTTCCCACATGACTGTCATCTCTCTCTCATG

G/TCTCTCTCTCATGGCAGCTGCATCTTCATGTACATAAAACCTTCAGCAAAAGAAGGAG

TTGCTGTCAATAAGGGAGTAGCTGTGCTCAGCACATCAGTGGCCCCTTTACTGAACCCCT

TCATTTACACCTTAAGGAATAAACAAGTAAAACAAGCCCTCAAGGATGTGGCCAGAAAGA

TTATGCATCTT

>LoafORs2.205P

GACTCCTACGTAGTTCTTCCTTTGGAATTTTTCCTTCTTGGAAATTTCCTTTACAACCAC

TTTCACTCCTAGGCTCTGATCGGCATCTCTACTGGGAATGAGGCCATCAGTTTTGCTGGC

TGCTTCACTCAGTATTTCTTTCCCATATTCCCTGGGGCAACAGAGTTTTACCTTCTGCCT

GCCATGTCTTATGATCGCTATGTAGCCATCTGCAAACCCCTACATTACGCAAGCATCATG

AACAACAGAGTCTATATCCAGGTTCTCTGCTTTTGGCTGGGTGGGTTCCTAATCATTTTA

TACCCCATCATCCAGACCAGTCAGCTGGATTTCTGTGCCTTCAATGTGCTGAATCATTAT

TGTTGTGATTATGCACCCCTCATAGAT

>LoafORs2.206P

ATGAAAAACCAGACTTCTTTGACTGAGTTTGTCCTACTGGGATTTACAGACAACCCAGAG

CTTCAGGCCATGGTTTTCATCTTCCTATTCCTCACCTACATATCCAGTGTCATGGGCAAC

GTGACAATCATCACCCTCACCCTGCTGGACTCCCATCCCCAGGCCCCTATGTATTTCTTC

CTCCAGAATTTCTCCTTCTTAGAAATTTCTTTCACTACTATTTTCATTCCAAGATTTTTG

AGCAGCATCCTAACAGGAAATAATACCATCAACTTTGCTGGCTACATCACTACGTAGTTC

TTTGATGAATTCCTCGAGGCCATAAAGCTTTACTTTATGGCTGCCATGTCCTATGACCTC

TACGTAGCCACCTGCAAACCTTTGCCATACACAACATTCATGAACAGCAGAGTCTGCACC

CAGCTGGTTCTCTGCCCTTGGCTGAGTGGTTTCCTAATCATCTTATCCTCCATCATCCTG

ACCAGCCAGCTAGACTGCTGTGCCTCCAATTGTGCTAAATCATTT/GTGCTAAATCATTT

TTACTGTGACTATGGGCCCCTCATGGAGATCTCCTGTTCAGACACCAGTCTCTTGGAGCT

GATTGACTTTATCTTAGCTATTGTGACCTTGGTGGTTACCCTAGTGCTGGTAATGCTTTC

ATACACTTACATCATCAAAACAATTCTGAAGATTCCATCAGCACAACAAAGAAAAAAGGC

CTTTTCCACATGGTCTTCCCATGTGATTGTCATCTCCATCGCTTATGGCAGCTGCATCTT

CATTTACATTAAACCCTCAGCAAAAGAAGGAGTTGCCTTCAACATTACTTCCATTGTTCC

CATATTGAATCCTTTCATTTAAACCCTAAGGAACCAAGTGAAAATAGCCTTCAAGAATAT

AGTTAGAAAGGTTGCGAGTCTT

>LoafORs2.207P

ATATTCCTCGGGGCAACAGAGTTTTTCCTTCTGGCTGCCATATCATACGATGGCTAAGTA

ACCATCTGCAAACCCCTACCTTACACAACTGTCATGAACAGAGCCTGCATCCAGCTGGTT

CTCCACTCTTGGGTGAGTGGATTCCTAATCATTTTATACCCCATCATCCAGACCAGTCAG

CTGGATTTCTGTGCCTCCAAAGTGCTGGATCATTGTGACTATGAACCCCTCATAGAAATA

CCTTGCTCAGACACAAGATTCCTAGAGCTGGTTGACTTTATCTTAGCAGTTGTGACCTTG

GCTGTCACCCCGGTGCTGGTGATTCTCACCTACACAAATATCATCAAGACCATTCTAAAG

ATTTTCTCTGCCCAAAAAAGGAAAAAGGCTTTTTCCACATGTTGTTCCTACATGATTGTT

ATCACTCTC

>LoafORs2.208

ATGAAAAACCAAACATTTCTGAAAGAATTTGTTCTGCTGGGACTAACAGACATCCCGGAG

CTTCAGACTGTAATTTTTATTCTTCTCTTCCTTACCTACATATTTAGCATCTTAGGTAAT

CTGACAATCATCACCCTCACACTACTGGACTCCCACCTCCAGACTCCCATGTATTTCTTC

CTCCAGAATTTCTCCTTCTTGGAAATTTCCTTTACAACCATTTTCACTCCTAGGCTGCTG

ATCAGCATCTCTACTGGGAATAAGGCCATCAGTTTTGCTGGCTGCTTCACTCAGTATTTC

TTTGCCATATTCCTCGGGGCTACAGAGTTTTACCTTCTGGCTGCCATGTCTTATGATCGC

TACGTAGCCATCTGTAAACCACTACATTACACAACCATCATGAACAACAGAGCCTGTATC

CAGCTGGTTCTCTGCTCTTGGCTGGGTGGGTTCCTAATCATTTTATACCCCATCATCCAG

ACCAGTCAGCTGGATTTCTGTGCCTCCAATGTGCTGAATCATTATTACTGTGACTATGGA

CCCCTCATAGAAATATCTTGCTCAGACACAAGACTTCTGGAGCTGGTCGACTTTATCTTA

GCAGTTGTGACTTTGGCAGTGACCCTGGTGCTGGTGCTTCTCTCCTACATGAATATCATC

AAGACCATTCTGAAGATCCCCTCTGCCCAGCAAAGGAAAAAGGCTTTTTCCACATGTTCT

TCCCACATGATTATCATCTCTCTGTCTTATGGCAGCTGCATCTTCATGTACATAAAACCT

TCAGCAAAAGAAGGAGTTGCCTTCAATAAGGGAGTAGCTGTGCTCAACACATCAGTGGCC

CCTTTACTGAACCCCTTCATTTACACTCTAAGGAACAAACAAGTAAAACAAGCCTTCAGG

GATGTGACCAGAAAGATTATGAGTCTTAAATGA

>LoafORs2.209

ATGAAAAATCAGACCATGACTGAATTCATCCTGCTGGGACTAACAGACATCCCAGAGCTT

CAGACCGTAATCTTCATACTTCTCTTCCTCACCTACATATTTAGCATCTTAGGTAATCTG

ACAATCATCACCCTCACACTACTGGACTCCCACCTCCAAACTCCCATGTATTTTTTCCTC

CGAAATTTCTCCTTCTTGGAAATTTCCTTTACAACCATTTTCACTCCTAGGCTGCTGATC

AGCATCTCTACTGGGAATAAGGCCATCAGTTTTGCTGGCTGCTTCACTCAGTATTTCTTT

GCCATATTCCTCGGGGCAACAGAATTTTTTCTTCTGGCTGCCATGTCTTATGATCGCTAC

GTAGCCATCTGTAAACCACTACATTACACAACCATCATGAACAACAGAGCCTGTATCCAG

CTGGTTCTCTGCTCTTGGCTGGGTGGGTTCCTAATCATTTTATACCCCATCATCCAGACC

AGTCAGCTGGATTTCTGTGCCTCCAATGTGCTGAATCATTATTGTTGTGACTATGGACCT

CTCATAGAAATATCTTGCTCAGACACAAGACTTCTGGAGCTGGTCGACTTTATCTTAGCA

GTTGTGACTTTGGCAGTGACCCTGGTGCTGGTGCTTCTTTCCTACACAAATATCATCAAG

ACCATTCTGAAGATCCCCTCTGCCGAGCAAAGGAAAAAGGCTTTTTCCACATGTTCTTCC

CACATGATTGTCATCTCTCTGTCTTATGGCAGCTGCATCTTCATGTACATAAAACCTTCA

GCAAAAGAAGGAGTTGCTGTCAATAAGGGAGTAGCTGTGCTCAACACATCAGTGGCCCCT

TTACTGAATCCCTTCATTTATACCTTAAGGAATAAACAAGTAAAACAAGCCCTCAAGGAT

GTGGCCAGAAAGATTATGCAACTTTATTTACTTTAA

>LoafORs2.210P

TTTCTTGCCCTGTTGCTCACCTACCTCCTGAATGCCTCTAGGAACGTGACCCTTATCAGC

CTGATCCTCCTGGACACCTGCCTGCAGACCCCTATGTACTTCTTCCTCTGAAATCTATCC

TGTTTAGAAATTTAGTTCCAAACTGTCATTGTGCCCAAGATGCTGCTCAACATTGCTACA

GGGACCAAAACTATCATCTTTACCAGCTGTATTGCCCCGGACTTTTTTCACATTTTCCTA

GGGGCCACAGAGTTCTTCCTATCCATGATCATGCCCTATGACTGGCACACTGCCATCTGC

AAGCCCCTCTACTACCCCATCCTCATGAGCAGCAGAGTCTGCACGCAACTCTTCCTTACC

TGCTGGCTGGCAGAGTTCTGTTTCATCATTGTGCCTGTCATCCTGACCAGTCAGCTTCCT

TTCTGTGAGGCCCACATCAACCACTTCTTCTGTGACCACATGCTTCTGATGGAGGTGGTC

TACAGTGGGCCAAATATGCTGGAGATGGTGGACTTTACCCTGGTCTTGAAGGCACTGCTC

AGCACAATCGTTCTGATCAACCTATCCTATGCCCAGATCATTTGGACAATTGTCAGGATC

CCCTGCCCCCAGGAGAGGAAGAAGTCTTTTTCTACTTGCTCCTCCCACATCATTGTGGCC

ACCATGTGCTATGGAAGTTGCTTCTTCATGTATGTCAAGCCCTATCCAGGCAAGAGGGTT

GATCTCAACAAAGAGGTGTCCCTAATCAATACAATTATTAACCCCCTCTTGAACCTTTTC

ATCTATACCTCAGGAACCAACCAGTTAAGCAGG

>LoafORs2.211

ATGGGGTGTGGTAATGGCACAGTAGTGACTGAGTTTGTTTTGCTGGGGTTCTCAAGTTTT

GAATCCCTCCAGGTGCCCCTGTTTTATGGGGTGCTCTGCATCTATCTGGTGACCTTGCTG

GGCAATGTCCTGATCATCCTCCTCACACTGGCAGACCCTGCCTTGCACTTGCCCATGTAT

TTCTTCCTTCGCCACTTCTCCATGGTGGAGATCCTCTACACAACAACCACCGTGCCTCGG

ATGCTGGTCGACCTCCTTTCCTCCTGCCCTACCATCCCACCTGCCAGTTGCTTCACCCAG

CTGTATTTCTTTGCCCTCTTTGGCATTGCTGAATGCTGCTTGCTCACAGTCATGGCCTAT

GACCGCTATGCTGCCATCTGCCGGCCCCTGCATTACACCACCCTGATGAACCGGGGAGCC

TGTGTGAGTATGGTGGGGGCCTCCTACCTCATGGGTATCATCACTGGCACTGCTCACTCC

ATCTGCATCTTCACCCTGCCCTTCCATGGCACAAACACCGTCCACCACTTCCTGTGTGAC

ATCCTGCCTGTGCTGAGACTGGCGAGTGCAAGCACCTTCTGGGGTGAAGTGGGGAATCTT

GCTGTCACAATAGCTTTTATCGTGACCCCTTTCTTACTGATCATGGCCTCCTATGCCTGT

ATCCTTACCACCATCTTTGGGGTCGCGACATCCCAAGGACGTCAAAAGATCTTCTCTACC

TGTTCCTCCCACCTGTTTGTGGTCTTGCTTTTCTTTGGGACTGGGACTGTTGCCTATATG

AGGCCCTGGGCTGATGCCTCTCAGGACACGGATCAGATCCTTGGCTTCTTCTACACAGTG

GTCACCCCCATGTTCAACCCTTTTGTCTACACTCTGAGGAACAAAGAGGTGACTGGGGCC

ATGAGGCGGCTGGTGAAGAGACACCTTTGGGGTCCATGA

>LoafORs2.212P

GCCTTGGGGAACCACAGCATCATCCCCTAGTTTATCTTCCTTGGGCTATCTGCTGACTTC

AACATCGAGGCTCTGCTCTTCGTGCTCTTCCAGGTGATCTACCTTCTGACTATGATGGGA

AACCTGATGATACTGCTGGTCACCAGGACTGATTCTCACCTCCACACACTCATGTTCTTC

TTCCTGAGTAAGCCCATGTACTTCTTCCTGAGTCACCTCTCTATCATTGATCTCTGCTTC

TCTTCAGTCACCGTGCCCAAGATGCTGGAGAACCTCCTGTCTTAGAAGAAAATCGTCTCA

GTAAGGGACTGCCTAGCTTAGATATTCTTTGTGCTTAAGGGACTGAAGCCTGTCTGC

>LoafORs4.1P

AACACAATAAAATATTATTTAAAAAACAAGGAAATTTCTTCCTTTTTTTTCTTTCCTTAC

AGGTTCACCTCCACCACCACCCTGCAGGTCCTAGGCCACCTCCTAACTGGCCACAAGACC

ATCTCGTGGGCCAGCTGCTTTGCCCAGATGGACTTCTACTTCATCCTGGGGACAACGGAG

ACCTTGTTGCTGGCAGTGACATCTGTGGACCTCCACCAGGCCATCGGCCACCCCCTGAGG

TACCTGCCTCTCCTGATGGCATAGGCCTGCCTGGCCCCCGAGCTGGTCTGCTGAGGCAAC

GAACAGCCTCCTCTTCCTCAGGGGACCCAGCATCTGGATGTTCTAGTTCCCTTTCTGTGG

CCCCAGTGTCCTCCACTACTTCTTCTGCAACAGTACCCTCTGCTGGAGCTGGTGTGTGCT

GGCACCAGGCTTCTCCAACTGGCCTCCTTCCTGGTGGCCTCGTGCACCTTGGACGGCTGC

TGTGGTGGTGACTGCCTGGTCCTGCGGCCACATCATCTGCACTGTCCTCCGCCTGCTCTT

CTTTGGGGCCACTGGAAGTCTTCCTCCACCTGTTTCTCCCACATCGTAGTGGTCTCCCTC

AGCTATGGCAGCTGCATCATCATACAGCTC

>LoafORs4.2P

CTGCGTTACGGGGTTATTAAGACACCCAGTGGCTGCCGCCACCCTTGGGCCAGTGCCGCG

GGGGCGTTGGGTTTTTCTGTTGTCCATGCCCAACGCCGTGGCTGCATTGCGTCTGCCCTT

CTGCCCCTGGGAAGCCCCCAGTGAACCACTTTCTTCTGCGAGCTGCCTGCGGTGCTGAGG

ACAGCGTGCGCAGACACCACGGCCAACCAGATGCTGGTCTATGGCTTGGGCACTCCTATC

CTTCTGGTGCCTTTGGCCTTCATCCTTGTGTCCTATGCCCTGATCCTGGGCCAGGTGGGC

AAGCTTCCGTCAGCCAAGAGCCGCCTCAAGGCACTGACCACCTGCAGCTCACACCTGACC

GTGGTGGGTCTCTTCTATGGCACCGTGACCGCCATGTACCTGGGCCGCCGGGGCTCCAGA

GCCCTCCCCACCAAACATCACAAGCTGGTGGCTGTGTTCTACCTTGTGGTCACACCCGTC

CTGAATCCACTCATCTACAGCCTCCGAAATCGCGAGGTCCATGCTGCAGCCCGATATGCG

CTGGCCCGGCTCTCAGGATTGCGCATTGTGCTG

>LoafORs4.3T

TTCTGCGATGTCTCCCCTCTGCTCAACTTGTCCTGCACCCACGTGGCCCTGACAGAGCTG

GTGGACTTCATCTCTGCCATCGTTATCCTCTGGGGTTCCCTCCTAGTGGCCATGGCCTCA

TATGCAGCTATTGGTAGGGCTGTGCTCCACATGCCATCAGCCACTGCCCGTCGCAAGGCC

TTCTCCACGTGTGCCTCCCACCTGGTAGTGGTGGGTATCTTTTACTCAGCCACTATCTTC

ATCTATGCCCGTCCCAGCCGCATAGAGGCCATGGACCTCAACAAGGTGCTCTCGGTCATT

TACACAGTGGTCACGCCCATGTGCAACCCAATCATCTACTGCCTTCGGAACAAGGAGGTC

CAGGGAGCTTTCCGTAGAACTCTGCATAGGTCCTGA

>LoafORs4.4

ATGGAGAGATCTTTGGAGTTGGCCAACATGACCAGAGTCCAGGAGTTTATCCTGCTGGGT

TTGTCCACAAGACTGGGTGTAATGGATGCCCTGTTTGCCATCTTCCTGGCCCTCTATGTA

TTGACCCTCTTGGAGAACACTCTCATCATCTACCTTATCTGCTATCACAGTGAGCTCCAC

AAACCCATGTACTTCTTCCTGGGCAACCTGAGCTGCCTAGAGATGTGCTACATGTCTGTG

ACCATGCCCAGCCTCCTCCTGGGGCTGTGGACAGGGCCTTGCCATGTGCCCTTCACAGCT

TGCACAATTCAGCTATTTTTATTTATATCCCTTATTGGCACCAAGTGCACCCTCCTGGCT

TCCATGGCCTATGACCGCTACGTAGCCATCTGTCGCCCACTCCACTACCCACTGCTCATG

CGGCCCCAGGTCTGCCTGGGCTTGGCCATGACTTCATGGCTTGGTGGCCTTCTGATCTCC

TTGATCAAAACCACATGCATCATGAGCCTCTCCTACTGTGGCCCCAATGTTCTCAACCAC

TTCTTCTGTGATGTCTCCCCTCTGCTCAACCTGTCTTGCACTCACATGGCCCTGACGGAG

CTGGTGGACTTTGTCTCTGCCATCATCATCTTCTGTGGGTCATTAGTAGTTGCTCTCTCC

TCCTATGTGGCCATTGGTAGGGCTGTACTCCGTATGACATCAGCTGCTGCCCACTGCAAA

GCCCTCTCCACTTGTGCCTCCCACCTGGTTGTAATGGGCATCTTCTACTCAGTGGTCCTC

TTCATGTACTCCCGACCCAGCTACATCGAATCCACAGACCTCAACAAGGTGCTGTCGGTC

ATCTACACAGCAATCACGCCCATATGCAGTCCAATTATCTACTGCTTGAGGAACAAGGAG

GTCCACATAGCATTAAAGAAGACTCTACGCCCACACTGA

>LoafORs4.5

ATGGAGAGGTCTCTGGAGTTGGCCAACATGACCAGAGTCCAAGAGTTTATCCTGCTAGGT

TTGTCCCCAAGGGTGAACATACGAGATGCCCTGTTTGCTGTCTTCCTGACCCTCTACCTG

CTGACCCTTTTGGAGAATACTCTCATCATCTACCTTGTCTATAGTCACAGTGAACTCCAC

AAGCCCATGTACTTCTTCCTGGGCAACCTGAGCTGCCTGGAGATGTGCTACGTGTCAGTG

ACCATGCCCAGTCTGCTTGTGGGACTGTGGATTGGATCCTACCACATTTCCTTCACAGTC

TGCATGACCCAACTCTTCTTTTTTGTTTCTCTCATCTGTATTGAGTGCACCCTCCTGGCC

TCCATGGCTTATGATCACTATGTGGCCATCTGTCACCCACTCCACTATCCACTGCTCATG

CGACCCCAGGTATGCCTGGGCTTGTCCTTGTCCTCATGGCTTGGTGGTCTTATGGTCTCA

GGGGTTAAGACCACATGCATTGCCAGCCTCTCCTACTGTGGCCCCAACGTCCTCAACCAA

TTTTTCTGTGATGTCTCCCCTCTGCTCAATCTTTCCTGCACCCACGTGGCCCTGACGGAG

CTGGTGGACTTCATCTCTGCCATTGTCATCTTTTGTGGTACACTGCTAGTAGCCTTGGCC

TCGTATTCAGCCATTGGGTTGGCCGTGCTCCACATGGCATCAGCCGCAGCCCGCCGTAAA

GCTTTCTCTACCTGTGCCTCCCATCTGGTCGTGGTGGGCATCTTCTACTCAGCCGCCCTC

TTCATCTATTGCCGTCCCAGCCGTATCAAGTCCATGGACCTCAACAAGGTGCTGTCGGTC

ACCTACACGGTGGTCACACCCATGTGCAACCCAATCATCTACTGCCTGCGGAACAAGGAG

GTCCATGCAGTGCTGAGAAAAACTCTCCATCTGCCTCGATGCTAG

>LoafORs4.6

ATGAACCAGAGCTGGACACATGAGTTTGTCCTGCTGGGCTTTGCCCACGTGCCCTTGCTG

CGCCCGCTACTCATAACACTTTTCTTGACCATGTTTCTGCTCACTCTGCTGGGCAATGGG

CTCATCGTGATGTTGTCTATGTGGGACCCAGCCCTGCGCACACCCATGTACTTCTTCCTG

CGCCAGCTAGCCCTTGTGGAACTCTGCTTCTCCCTGGATATTGTGCCCCGGCTACTGGCC

ACCCTGCTGTGGCCTGGGTGTGGCATGTCACCTGTGGACTGTGCACTGCAGCTGCTGCTG

GTCCTGGCCTGTGTCACCTCTGAGTGCTTCCTCCTGACCATCATGGCCTGGGACCGATAC

GTGGCCATCTGCAGGCCCCTGCACTATGGCGCCATCATGAGCCCACAGCTCTGCCACCTG

CTGGCTACCACCTGCTGGCTGGCTGGAGTCCCCGTGTCCCTGGTTTTCACAATCTGGTTG

TTCAGCTTCCCCTTTTGTGGACCACGTGGCATACATCACTTCTTCTGCGACATTGCCCCT

CTGCTAAGCCTGGTGTGTGCAGACACTAGGGTCTTTGAGACCAATGTGTTGGTGGCCACA

GTGCTGGTCATCATGGTTCCATTTTGTCTGATAGCTGCATCCTACATTGCGGTATTGGTC

ACTGTCCTACGGGTACCATCAGCCACGGGTCGCCACAAAGCCCTGTCCACATGTGCCTCC

CACTTCATCGTGGTGGTTCTGTTTTATGGCACAACAGGGATCATCCACTTGCGACCCAAG

GCCAGCTACTCCCCAGAGAGCAAGCAGGTGGTGTCCCTCTCCTATACTGTGGTCACCCCC

ATGCTCAACCCCCTCATTTACAGCCTGCGGAACAAGGAGGTGAAGGCTGCCCTGGGCCGT

GTATGTTCTGGATGA

>LoafORs4.7

ATGGAGAGGTCCCTGGACTTGGCCAACGTGACCAGAGTCCAGGAGTTTATCCTGTTGGGT

TTGTCCACAAGACCAGACTTAAGGAATGCCCTGTTTGCTGTCTTCCTGACCCTCTACCTG

CTGACCCTTTTGGAGAACACTCTCATCATCTACCTCATCTGCAGTCACAGTGAGCTCCAC

AGGCCCATGTACTTCTTCCTGGGCAACCTGAGCTGCCTGGAGATGTGCTACGTGTCAGTG

ACCATGCCCAGCTTGCTTGTGGGACTGTGGACTGGACCCTACCGTATTTCCTTCACAGCC

TGCATGACCCAACTCTTCTTCTTCATTGTCCTAATTTGCACTGAGTGCACTCTCTTGGCT

TCTATGGCCTATGACCGTTACTTGGCCATCTGTCACCCACTCCACTATCCACTGCTCATG

CGACCCCAGGTATGCCTGGGCTTGGCCTTGTCCTCATGGCTTGGTGGTGTTCTGGTTTCA

GTGGCCAAGACCACGTGCATTGCCAGCCTCTCCTACTGTGGCCCCAATGTCCTCAACCAA

TTTTTCTGTGATGTCTCCCCTTTACTCAACCTGTCCTGCACCCACGTGGCCCTGACGGAG

CTGGTGAACTTCATCTCTGCCATTGTCATCTTTTGTGGTACACTGCTAGTAGCCTTGGCC

TCGTATTCAGACATTGGGGTGGCCGTGCTCCTCATGCCATCAGCCGCAGCCTGCCGTAAA

GCTTTCTCTACCTGTGCCTCCCATCTGGTTGTGGTGGGCATCTTCTACTCAGCCGCCCTC

TTCATCTATTGCCGTCCCAGCCGTATCAAGTCCATGGACCTCAACAAGGTGCTGTCGGTC

ACCTACACGGTGGTCACACCCATGTGCAACCCAATCATCTACTGCCTGCGGAACAAGGAG

GTCCATGCAGTGCTGAGAAAAACTCTCCATCTGCCTCGATGCTAG

>LoafORs4.8

ATGGATGCCAACCAGAGCTGGGCATGTGAGTTCATCCTGCTGGGTTTTGCCCATGTGCCC

ACACTGCGCCCTCTACTAGCCGCACTTGTCCTGGCCGTGTTCCTGCTCTCACTGTTGGGC

AATGGGCTTATCGTGCTGTTGACCATGTGGGATGCAGCCTTGCATGCACCCATGTACTTC

TTCCTGCGCCAGCTAGCCCTTGTGGAACTCTGCTTCTCCCTGGACATTGTACCTCGGATG

CTAGCCACACTGCTGTGGCCTGGGCATGGCATGTCACCTGTAGGCTGTGCGCTGCAGATG

CTACTGGTGCTGGCTTGTGTAACGTCCGAGTGCTTTCTCCTGACCATCATGGCGGGTGAC

CGCTACCTGGCCATCTGCAAGCCCCTGCACTATGGCACCATCATGAGCCCACAGCTCTGC

CACTTGCTAGGTGCCTCCTGCTGGCTGGCTGGAGTCCCTGTGTCACTGGTATTCACAATC

TGGTTGTTCAGCTTTCCATTCTGTGGGCCATGTGGCATACACCACTTCTTCTGTGACATC

AGCCCTCTGCTGAGCCTGGTGTGTGCAGACACTAGGGTCTTTGAGACCAATGTGTTGATG

GCCACAGTGATTGTCATGATGGTTCCATTTTGTCTGATTGCTGCATCCTATATTGGAGTG

TTGGTCACTGTCCTACGAATGCCATCATTCACAGGGCGCCACAAAGCCCTGTCCACATGT

GCCTCCCACCTCATCGTGGTGGTTCTGTTTTATGGCACAACGGGGGTCATCCATTTGCGT

CCCAGGGCCAACTACTCCCCAGAGAGCAAGCAGGTGGTGTCCGTCTCCTATACTGTGGTC

GCCCCCATGCTCAACCCCCTCATTTACAGCCTGAGGAACAAGGAGGTGAAGGCTGCCCTG

GGCCGTGTGTGTTTTGGCTGA

>LoafORs4.9

ATGACCAACCTCACAGCAGTATCTGTCTTCATCCTCCAGGGCTTCTCAGCCATCCCTGAG

TTACAGCTCCTCAGCACGGCAGCCTTCCTTCTCATTTACATTGCTGCAGTGCTGGGGAAC

ATCTCCATTGTGGCTGCCGTGACACTGGACGCCAGCCTGCACACGCCCATGTACTTCTTC

CTCAAAAACCTCTCCCTGGTGGACATCTGCTCCATATCCACCACTCTGCCCCGGGCCATG

ATGGCTGCCACGGTGGGCTCAGGGGAGATTTCACTCCCTGCCTGTGCATCTCAGCTCTTC

GCCTTTGTCTGCTTTGGGTCAGTGGAGTGCTTTCTCATCACTTCCATGGCTTATGACCGC

TGTCTGGCCATTTACAGGCCCCTGTTGTACAGGGCAGCCATGAGCCCCCAGACCTGTGTC

TCCCTGGTGGTGGTGGCTTGGGGCAGTGGGCTCGTTTACTCCACCTTCCACACAGCCAAC

ACCTTCTCCCTGCCCTTCTGTGGCCCCAATGTGATTGACCACTTCTTCTGTGACATTCCC

CCCGTCATGCACTTGGTCTGTGCCAGCGCAGATGCTCACGAGGCTACTGGATTTGCAGTC

AGCGGCTGCGTCATCATGAGCTGCTTCACCCTCACCATTCTCTCCTATGTCCGCATCTTG

GCTACTGTGGTCCAGATCCGCTCAGCAGCTGGCCGCGGGAAGGCCTTCTCTACCTGCTCT

TCTCATCTGGCCACAGTGCTCCTGTTTTATGGCACTGGCAGCTGTGCCTACATGCAGCCC

ACCACCCACTACTCCCTACTGCAAGGGCGCCTGGCTGCAGTCTTCTACTCTGTCCTCACG

CCCAGCCTGAACCCGCTCATCTACAGCCTGAGGAACAAAGACATGAAGAAGGCCCTGCAG

AAGCTCTACCTCCAGGTACCATTGTAG

>LoafORs4.10

ATGACCAACCTCACAGCAGTATCTGTCTTCATCCTCCAGGGCTTCTCAGCCATCCCTGAG

TTACAGCTCCTCAGCACGGCAGCCTTCCTTCTCATTTACATTGCTGCAGTGCTGGGGAAC

ATCTCCATTGTGGCTGCCGTGACACTGGACGCCAGCCTGCACACGCCCATGTACTTCTTC

CTCAAAAACCTCTCCCTGGTGGACATCTGCTCCATATCCACCACTCTGCCCCGGGCCATG

ATGGCTGCCACGGTGGGCTCAGGGGAGATTTCACTCCCTGCCTGTGCATCTCAGCTCTTC

GCCTTTGTCTGCTTTGGGTCAGTGGAGTGCTTTCTCATCACTTCCATGGCTTATGACCGC

TGTCTGGCCATCTACAGGCCCCTGTTGTACAGGGCAGCCATGAGCCCCCAGACCTGTGTC

TCCCTGGTGGTGGTGGCTTGCAGCAGTGGGCTCGTTTACTCCGCCTTCCACACAGCCAAC

ACCTTCTCCCTGCCCTTCTGTGGCCCCAATGTGATTGACCACTTCTTCTGTGACATTCCC

CCCGTCATGCACTTGGCCTGTGCCAGCACAGATGCCCATGAGGCTACTGGATTTGCAGTC

AGCGGCTGCGTCATTATGAGCTGCTTCACCCTCACCATTCTCTCCTATATCTGCATCTTG

GCTACTGTGGTCCAGATCCGCTCAGCAGCTGGCCGCGGGAAGGCCTTCTCCACCTGCTCT

TCTCATCTGGCCACAGTGCTCCTGTTTTATGGTACTGGCAGCTCTGCCTACATGCAGCCC

ACCACCCACTACTCTCCACTACAAGGGCGCCTGGCTGCAGTCTTCTACTCTGTCCTCACG

CCCAGCCTGAACCCGCTCATCTACAGCCTGAGGAACAAAGACATGAAGAAGGCCCTGCAG

AAGCTCTACCTCCAGGTACCACTGTAG

>LoafORs5.1P

ATGGACCAAAACAATTATACCTCTCTACATGGTTTTATTCTGCTTGGCTTCCCTGATCAT

CTCAAACTGGAGATGGTCCTGTCAGGAGTTGTCACTATCTTCTACTTAATTACATTGGTG

GGTAACACAGCCATCATTGTTACATCTCTCCTGGATTCCCATCTGCACACACCAATGTAT

TTTTTCCTCAGGAATTTATCTTTCCCAGATTTGTTTTAC/ATTTGTTTTACCACCAGCAT

CATACCTCAGATGCTGGTTAACTTGTGGGGCCCTGATAAGACCATCAGCTATGTGGGTTG

TGTCATTTAACTCTATGTTAATATGTGTTTAGGCTCCGCTGAATGCCTTCTCCTGGCTGT

CATGTCCTATCATCGTTTTACAGCTATTTGTAAACCCTTGCATTATTTGGTAATCATGAA

GCCACAACTTTGTCTCAAGATGATCATCATGGTTTGGGGTATTAGTTTGGCCTGTTCTGC

AATATTGTGTACACTCACACTGAATTTGCCTAGGTGTGGAAACAACCTTCTGGATCATTT

CTTGTGTGAGTTGCCAGCTATGGTCAAAATAGCATGTACAGACACCACAACTGTTGAAAT

GTCTGTTTTTGCTTTAGGAATTGTCATTGTCCTTACACCCCTCCTCCTTATTCTTATATC

CTATGGTTACGTTGCACAAGCTGTGCTGAGAATGAAGTCAAAAGCAGGCCAAAGAAAAGC

AATTAATACCTGTGGATCTCATCTCACTGCGGTGTCCATCTTCTACGTAACTGTCATCTA

CATGCACCTACAGCCAGGTAACAGTGCCTCCAAAGACCAGGGCAAGTTCCTCACCCTCTT

TTACGTCATTGTCACTCCAAGTCTGAACCCCCTCATCTACACCTTAAGGAATAAGGATAT

GAAAGATGCACTGAAGAAGTTGGTGAGAGTTGCCTGTCAATCTACAAAAATGAAGAGGAA

ATGGATATCA

>LoafORs6.1

ATGGATGCTGCCAACAAGTCTTCAGAGGGAGCCCCATTCATCCTATTGGGACTGATGACA

AGTCCTGGACAGCGGTGGCCCCTCTTTGTGCTGTTCTTGGTCTTGTATGTGGCAGGCATC

CTGGGAAATGGACTCATTGTGGCCGCCATTCTGGCCAGTCCAGCCCTTCATGCACCCATG

TACTTCCTGCTGGCCCATCTGTCCTTTGCTGACCTCTGCTTTACCTCTGTCACTGTGCCC

AAGATGTTGGCCAACTTGCTGGCCCATGACCGCTCCATCTCCCTGGCTGGCTGCCTGACC

CAAATGTACTTCTTCTTTGCCCTGGGTGTAACTGACAGCTGCCTCCTGGCTGCCATGGCC

TTTGACCGCTACGTGGCCATCCGGCACTCCCTCCACTATGCCACGAGGATGTCCCGGACC

ACGTGCACAGCCCTGGTGGGGACTGCATGGGTCATATCCCATGTCCACTCTCTCCTGCAT

ATCCTGCTTATGGCCCGCCTGTCTTTCTGTGCCTCCCATCAAGTGCCCCACTTCTTCTGT

GACCACCAGCCTCTCTTAAGGCTCTCATGCTCTGACACCCGCCACATCCAGTTGCTCATC

TTCACTGAGGGTGCTGCAGTGGTGGTTACTCCCTTCTTGCTCATTCTCACCTCTTATGGG

GCCATTGCAGCTGCTATTATCCAGCTGCCCTCAGCCTCTGGGAGGCTCCGGGCTGTGTCC

ACCTGTGGCTCCCACCTGGTTCTGGTAGGCCTCTTCTATGGGACAGTCATTGCGGTCTAT

TTCCAGCCCACATCCCGATATGAGGCACAGCGGGGTCGCGTGGCCACTGTCATGTACACT

ATAGTCACACCCATGCTGAACCCTGTCATCTACAGCCTTCGGAATCGTGATGTACAGGGG

GCGCTCCGATCCCTTCTCCCTAAGCAAAGGATCTTGGCTAGTGACTTCTGA

>LoafORs6.2P

TTCATCCTCCTGGGCATCACAGATCGCTGGGACCTGCGCATTACCCTTTTCCTGATCTTC

CTGACTGTCTACCTAGTGAGCCTGCTAGGAAACATGGGCATGGTGCTGCTAATCTGCGTG

GATGCCCGGCTCCACATGCCTATGTACTTCTTCCTGGCCAACCTCTCTCTGTTGGATGCC

TGCTATTCCTCAGCCATTGGCCCCAAGATGCTAGTGGACCTGCTACTGCCCCGTGCCACC

ATCCCTTACGCAGCCTGCGCCCTCCAGATGTTTGTATTTGCAGGTCTGGCTGATGCTGAG

TGCTGCCTCCTGGCAGCCATGGCCTATGACCGCTATGTAGCCATCAGAAACCCTCTTCTC

TATACAACAGCCATGTCAAGGCATCTATGCCTGGCCTTGCTGGGAGCATCAGGCCTGGGA

GGAGCAGTGAGTGCCTTTGTCCATACAACCTTCACCTTCCGCCTGAGCTTCTGCCACTCC

CGTGAGATCAACAGCTTCTTCTGCAATATCCCTCCACTGCTGGCCATCTCATGCAATGAC

ACCAGTCTCAATGAACTCCTCCTCTTTGCCATCTGTGGCTTCATCCAGATGGCCACAATA

CTGGCTATTGCTGTGTCCTATGGCTTCATTGCTGGGGCTGTGATCCGCATGCATTCAGCA

GAGGGCCGCCGACGAGCAGCCTCTACCTGTGGGTCCCACCTCACAGCTGTGGCTATGCTC

TATGGGACTCATTTTTATGTA

>LoafORs6.3P

AAACCAAACCAAAGCAGCATTTCTGACTTCCTTCTTCTGGGCTTCTCTGAGCAGCCAGAG

AAGCAGCCTCTTCTGTTTGGGCTCTTTCTGGGCATGTACCTGGTGACGATTTTGGGAAAC

CTGCTCATCATCCTGGCCATCAGCTTTGACACACACCTCCATACACTCATGTACTTCTTC

CTGGCCAACCTGTCCTTCGTCGATACCTGCTTCACATGCACCACTGTCCCCAAGGTGTTG

GTGAACATCCAGACACAGCATCACACCATCTCCTACACTGGTTGCCTGGTGCAGATGCAC

TTCTTCATGGCATTGACCCTGCAGGATGACTTCCTGCTGGCCATGACGGCATCTGACCGC

TACGTGGCCATCTGCCTTCCTCTCCACTACACTACAATCATGCAGCCCTAATGCTGCCTG

CTGCTCATAGCCACATCCTGGCTCTGCTCTCAACTCCTGACCTTTTCATTCACTCTCCTA

ATGGCTCAGTTCTCTTTTTGTGCCTCTCACTCAATCCCACACTTTTTCTGTGATCTTCTC

CCACTCTTCAAGCTTGCCTGTTCAGACACTCGTATCTTTCAGGCTATGATGTTCATTGAA

GCAGCCCTCTCAGGTGTGGTCCCTCTCACCTGTGTACTGGTCTCTTATGCCCACATCATC

CACACCATTCTCAGGGTCTCCTCTGCTGGCGGAAAGCACAAAGTCTTTTCTACTTGTGGA

TCTCATCTAACAGTGGTCACTCTCTTCTATGGGACACTCTTTCTCGTCTATTTTCAGCCA

TCATCTTCCTACTCAGCAGATACTGGAATGTTGGCGTCTGTGATATACACGATGGTCACC

CCCATGTTGAACCCCTTTATCTACAGCCTGAGGAACAGGGACATGAGGGATGCTTTGTGG

GAACTCCTTGGC

>LoafORs6.4P

AACAGAACCAGCATCTCTGACTTCTTCCTTCTGAGCTTCTCCAAGCAGCTGAAGCATCAG

TCTCTCCTGTTTGGGCTCTTCCTGGGCATGTACCTGATCACGATGTTGGGGAACCTTCTC

AACATCTTTGCCATCAGTTCTGACCCTCATCTCCACACCCCCATGTACTTCTTCTTGGCC

AATCTGTCCTTCATTGATACCTGCTTCACCTGCACCATTGTCCCCAAGGTGTTAGTGAAC

ATCCAGACACAGCATTACACCATCTCCTACACTGGGTGCCTGATGCAGATGTACTTCTTC

ATGGCATTCGCCCTGCTGGATGACTTTCTGTTGACGGTGATGGCATATGACTGCTATGTG

GCCATTTGCCTTCCTCTCCACTACACCACAATCATGGGACCGAAACACTGCCTGCTGCTG

ATGGCTGCATCTTGGCTCTGCTCCCACTGCCTGGCCTTCTCACTTATCCTCCTGATGTCT

CAATTCTCCTTCTGTGCCTCCCATTCCATCTCACACTTTTTCTGTGATCTCCCGCTCCTC

AAGCTTGCTTGTTCTAACACCCATATCTTTCAGGTTATGATGTTCATTGAAACAGCCCTC

TCAGGTGTGGTCCCTCTTACCTGTGTCCTGACATCTTATGTCCACATCATCCACACCATC

TTCAAGGTCCCCTCTGCTGGGGGGAAGCAAAAAGTCTTCTCTACCTGTGGCTCTCACCTG

ACAGTGGTCACTCTCTTCTATGGAACTGTCTTTCTGGTCTATTTTCAGCCATCATCCTCC

TACTCACCAAATACTGGAATAGTGGCATCTGTGATATACACAATAGTCACCCCCATGTTG

AATCCCTTTATCTACAGCCTGAGGAACAAGGACATGAAGAGGGCTTTATGGAGACTCCTT

GGCTGTGGAAAATGCTCTACT

>LoafORs6.5P

CAGCTTCTCCTGTTCAGCCTCTTTCTGGGCATGTACCTGGTCACTGTATTGGGGAACCTG

CTCATCATCCTGGCCATCAGTTCTGACACACACCTCCATACACCCATGTACTTCTTTCTG

GCCAACCTGTCCTTCATTGAGACCTGCTTCACCTGCACCATTGTCCCAAAGGTGCTAGTA

AATATCCAGACACAGCATTACGCCATCTCCTACACTGGGTGCCTCATACAGATGTATTTC

TTCATGGTGTTTACCCTGTTGGATGACTTCCTGCTGGCTGTGATGGCATATGACCGATAC

GTGGCCATTTGTCTTCCTCTCCACTACACCATGGTCATGCGTCCCCAACATTGCCTGCTG

CTGGTGACAGCATCCTGGCTTTGTTCCCAACTACTGGCCTTCTCACTTACTCTCCTGATG

TCTCAGTTCTCCTTCTGTGCCTCCCATTGCATCCGACACTTTTTCTGTGATGTACCCCCA

CTTCTAAAACTTGTCTGTTCAGACACCCATACCTATCAAAACACAATGTTAACTGAAGCA

GTTCTCTCAGGCATGATTCCTCTCACCTGTGTTCTGGTCTCTTACGTCCACATCATCCAT

ACCATCGTCAGTATCCCCTCTTCTGTGGGTAAGCACAAAGTCTTCTCTACCTGTGGCTCT

CACCTGTCTGTGCTCAGTCTCTTTTACGGGACCCTCTTTCTTGTGTATTTCCAGCCATCA

TCCTCCTACTCAGCAGATACTGGAATGGTTGCATCTGTGATATACACAGTGGTCATCCCC

ATGCTGAACCCTTTTATCTACAGCCTGAGGAACAGGGAAATGAAGGGAGCTGTGTGGAGA

CTC

>LoafORs6.6

ATGCTGAGGGAAAACCAGAGCCACATTACTGAATTCTTCCTCCTGGGACTAACCACTGAC

CCCAACCAGCAGATGTGGCTCTTTGCCAGCTTCCTAGCCACTTACCTGATCAATGTGGTT

GGCAACTCAATCATCATTGCAGCCATCCTAGGGGATGCCCACCTCCATACCCCCATGTAT

TTCTTCCTCTCCAACCTGTCCCTGGTAGACATCTGCTTTACAACTGTTATTGTGCCACAA

ATGTTAGTGAACATGCTGACTCAGAGAAGGACCATCCTCTTTGCCCAGTGCCTCACTCAG

ATGTATTTCTTTGTGGCATTTGGTATCACTGACAGCTTTCTTCTGGCTGCCATGGCCATT

GACCGCTATGTGGCCATCTGTAACCCACTACACTATACTTCAACCATGAGCCCCAGACGC

TGTCTCCTGCTGGTGATGGCATCCTGGGTGGTGTCCCACCTCCACTCACTGACTCACACA

ATTCTCATGGCCCGCCTTTCCTTCTGTGGGTCCAATATCATCCACCACTTCTTCTGTGAT

GTCCAGCCATTGCTAACACTCTCCTGCTCTGACACCTCTGTAAAAGAACTTTTGGCCTTC

ACAGAGGGCTCCTTGGTGATCATGAGTCCCTTTATCTTCATTATTGTGTCTTATGTCTAC

ATTACTCGTGCTGTTCTGAGGGTCCCTTCAGGAGGAGGCAGGTACAAGGTCTTCTCTACC

TGTGGATCCCACCTCATGATTGTGGCACTATTCTACGGGACCATCATATCTGTATACATT

CGCCCCTCATCCACCTACTCAGTAACAAAGGACCGTGTGGTCACTGTCATCTATACAATA

GTTACTCCCACACTGAATCCTTTTATCTATAGCTTTAGGAACAAAGACATGAAGCAGGCC

TTGAGAAAGCTGACTAGGAGGGCAGAATAA

>LoafORs6.7

ATGCCAAGGGGAAACCAGAGTCACATCACTGAATTCCTCCTCATGGGACTGACCACTGAC

CCCATACAGCAGATATGGCTCTTTTCCAGCTTCCTAGCCATGTACCTGGTCAATGTGGTT

GGCAACTCAGTCATCATTGCAGCCATCCGAAGGGATGCTCACCTCCACACCCCCATGTAC

TTCTTCCTGTCCAACCTGTCTTTCATGGATATCTGCTTTACAAATGTCATTGTGCCAAGG

ATGCTGGCAAACATGCTGAGCAAGAGCAAGAAGGTCCCCTTTGCCCAGTGCCTCACCCAG

ATGTATTTCTTTGTGGCCTGTGCAATCACTGACAGCTTCCTTCTGGCTGCTATGGCTGTT

GACCGCTATGTGGCCATCTGTAACCCTCTACATTACACCACAGCCATGAGCCCCAGGCGC

TGTCTCCTGTTGGTGATGGTATCATGGGTGGTGTCCCACCTCCACTCACTAACCCACACA

ATTCTCATGGCCCGCCTTTCCTTCTGTGGTTCCAATATCATCCAACATTTCTTCTGTGAT

GTCCAGCCGCTGCTAATGCTCTCCTGCTCTGACACCTCTGTCAATGAGCTTTTGGCCTTC

ACAGAGGGCTCCTTGGTGATCATGAGTCCCTTTATCTTCATTATTGTGTCTTATGTCTAC

ATTACTCGTGCTGTTTTGAAGGTCCCTTCAGGAGGAGGCAGGTACAAGGTCTTCTCTACC

TGTGGATCCCACCTCACAGTTGTGGCACTCTACTATGGAACTGCCATCTCAGTGTACATT

CGCCCCTCATCCACCTACTCAGTGACAAAGGATCGTGTGGTCACTGTCATCTATACTGTG

GTGATCCCCATGCTGAATCCTTTTATCTATAGTCTTAGGAACAGGGACATGAAACAGGCC

TTGAGAAAGCTGACTAGGATAACAGAATAA

>LoafORs6.8

ATGGAGATAAAGAACTACAGTAGCAGTACTTCAGGCTTCATTCTTCTGGGCCTCTCCTCC

AACCCTCAGCTGCAGAAGCCTCTCTTTGCCATCTTCTTCACGATGTACCTGGTCACCATG

ATGGGGAACATGCTCATCATCCTAGCCATACGTTCTGACTCCAGGCTCCACACACCTATG

TACTTTTTCCTCAGCAACTTGTCCTTCATGGATATCTGCTTCACAATGGTCATTGTGCCC

AAGATGCTGGTGAACTTACAATCAGAGACAAAGACTATCTCCTACCTGGGCTGCCTAGTC

CAGATGTACTTCTTCATGGCCTTTGGGAATACTGACAGCTATCTGCTGGCATCAATGGCC

ATAGACCGGCTGGTGGCCATCTGCAACCCCTTTCATTATGATGTGGTCATGAACCCACGG

CGTTGTCTTCTTATGTTACTGGGTTCTTGCACCATATCCTACCTGCACGCCTTGCTCCGG

GTGCTGCTCATATCTCGCCTCTCTTTCTGTGCCTCTCATGTCATTAAGCACTTTTTTTGT

GACACTCAGCCTGTGCTAAAGCTGTCTTGCTCTGACACCTCCTCCAGCCAGATTGTGGTC

ATGACTGAGACTCTGGCTGTCATCGTGACCCCTTTCTTGTGCGTCCTCTTCTCCTACATA

CGGATTATCATCACTGTGCTCAGAATACCCTCCGCAGCCGGGAGGTGGAAGGCCTTCTCT

ACCTGTGGCTCCCACCTCACCGTAGTAGCTCTGTTCTATGGGAGTATCATCTATGTTTAT

TTTAGGCCCCTGTCCATGTACTCAGTAGTGAAGGACCGAGTAGCCACAGTTACATACACT

GTGGTGACACCCATGTTGAACCCTTTCATCTATAGCCTGAGGAACAAGGATATGAAGAGA

GGTTTGGGAAAGTTAAGGGACAGAATTCACTCATAG

>LoafORs6.9

ATGGAGATAAAGAACTACAGCAGCAGCACTTCAGGTTTCATCTTTCTGGGCCTCTCCTCC

AACCCTCAGCTGGAGAAGCCTCTCTTTGCCATCTTCCTCACCATGTACCTGGTCACCACG

GTGGGGAATGTGCTCATCATTCTAGCCATACATTCTGACTCCAGGCTCCAAACACCTATG

TACTTTTTCCTCAGCAACCTGTCCTTCATGGATATCTGCTTCACAATGGTCATTGTGCCC

AAGATGCTGGTGAACTTACAATCAGAGACAAAGACTATCTCCTATGTGGGCTGCCTGGTC

CAGATGTACTTCTTCATGGCCTTTGGGAATACTGACAGCTATCTGCTGGCATCAATGGCC

ATAGACCGACTGGTGGCCATCAGCAACCCCTTCCATTATGATGTGGTCATGAACCCACAG

CGTTGTGTTCTCATGTTACTGGGTTCTTGCACCATATCCCACCTGCACTCCTTGTTCTGG

GTACTCTTTCTGTCCCACTTATCTTTCTGTGCCTCCCACGTCATTCAGCACTTTTTTTGT

GATATCCAGCCTGTGCTAAAGCTGTCATGCACTGACACCTCCTCCAGCCAGATTGTGGTC

ATGACTGAGACCCTGGCTGTTGTTGCGACCCCTTTCCTGTGCATCCTCCTCTCCTACATG

CAGATTATCATCACTGTGCTCAGAATCCCCTCCACAGCCGGGAAGTGGAAGGCCTTCTCT

ACCTGTGGCTCTCACCTCACTGTAGTAGCCCTGTTTTATGGGAGTGTCATCTATGTTTAT

TTTAGGCCCCTGTCCATGTACTCAGCAGTAAAGGACCGAGTAGTCACGGTTATGTACACC

GTGGTGACACCCATGTTGAACCCTTTCATCTACAGTCTGAGAAACAAGGATATGAAGAGA

GGTATGGGGAAGTTAAGGGACAGAATTCACTCATAG

>LoafORs6.10P

ATGGAGATAAAGAACTACAGCAGCAGCACTTCAGGCTTCATCCTTCTGGGCCTCTCCTCC

AACCCTCAGCTGCAGAAGCCTCTCTTTGCCATCTTCCTCATCATGTACCTGGTCACCATG

GTGGGGAATGTGTTCATCATCCTAGCCATACATTCTGACTCCAGGCTCCATAACCCAATG

TACGTTTTCCTCAGAAATTTGTCCTTCATGGATATCTGCTTCACAACGGTCATTGTGCCC

AAGATGCTGGTGAACTTACTATCACAGACAAAGACTATCTCCTACGTGGGCTGCCTGGTC

CAGATATAATTTTTAATGGCCTTTGGGAATACTGACAGCTACCTGCTGGCATCCATGGCC

ATAGACCGACTGGTGGCCATCTGCAACCCCTTCCATTATGATGTGGTCATGAACCCACAG

CGTTGTCTTCTCATGTTACTGGGTTCTTGCACCATATCTCATCTGTACTCCTTGCTCTGG

GCGCTGCTCATGTCTCGTCTGTCTTTCTGTACCTCCCATGTCATTAAGCACTTTTTTTGT

GACACCCAACCTGTGCTAAAGCTGTCCTGCTCTGACACCTTCTCTAGCCAGATTGTGGTC

ATGACCGAGACCCTAGCTGTCATTGTGACACCTTTCTTGTGCATCCTTTTCTCCTACACA

TGGATTATCACCGCTGTGCTCAGAATTCCCTCCACAGCCAGAAAGTGGAAGGCCTTCTCT

ACCTGTGGCTCCCACCTCACTGTAGTAGCTCTGTTCTATGGGAGTGTCATCTATGTTTAT

TTTAGGCCTCTGTCCATGTACTCAGTAGTGAAGGACCGAGTAGCCACAGTTATGTACACT

GTGGTGACACCCATGTTGAACCCTTTCATCTACAGTCTGAGAAACAAGGATATGAAGCGG

GGTCTGAGGAAGTTAAGGGAGAGAATTCAC

>LoafORs6.11

ATGGAGATAAAGAACTACAGCAGCAGCACTTCAGGCTTCATCCTTCTGGGCCTCTCCTCC

AACCCTCAGCTGCAGAAGCCTCTTTTTGCCATCTTCTTCACCATGTACCTCGTCACCATG

GTGGGGAATGTGCTCATCATTCTAGCCATACATTCTGACTCCAGGCTTCATACTCCTATG

TACTTTTTCCTCAGCAACTTGTCCTTCATGGATATCTGCTTCACAACAGTCATTGTGCCC

AAGATGCTAGTGAATTTACTATCAGAGGAAAAAACTATCTCCTACGTGGGCTGCCTGATC

CAGATGTACTTCTCTATGGCCTTCGGGAACACTGATAGCTATCTGCTGGCATCCATGGCC

ATAGACCGACTGGTGGCCATCTGCAACCCCTTTCGTTATGATGTGGTCATGAGCCCACAG

CGTTGTCTTCTCATGTTACTGGGTTCTTGCACCATATCTCATCTGCACTCCTTGCTCCGG

GTGCTGCTCATGTCTCGTCTGTCTTTCTGTGCCTCTCATGTCATTAAGCACTTTTTTTGT

GACACTCAGCCTGTACTAAAGCTGTCCTGCTCTGACACCTCCTCCAGCCAGATTGTGGTC

ATGACTGAGACCCTGGCTGTCATTGTGACACCTTTCTTGTGCATACTCTTCTCCTACATA

CGGATTATCATTGCTGTGCTCAGAATCCCCTCCGCAACTGGGAAGTGGAAGGCCTTCTCC

ACCTGTGGCTCCCACCTCACTGTAGTAGCCCTGTTCTATGGGAGTGTCATCTATGTTTAT

TTTAGGCCCCTGTCCATGTACTCAGTAGTGAAGGACCGAGTAGCCACAGTTACATACACT

GTGGTGACACCCATGTTGAACCCTTTCATCTATAGCCTGAGGAACAAGGATATGAAGAGA

GGTTTGGGAAAGTTAAGGGACAGAATTCACTCATAG

>LoafORs6.12

ATGGAGGTACAGAACTACAGCAGCAGCACTTCAGGTTTCATCCTTCTGGGCCTCTCCTCC

AACCCTCAGCTGCAGAAGCCTCTCTTTGCCATCTTCCTCACCATGTACCTGGTCACCGTG

GTAGGCAATGTGCTTATCATCCTACCCATACATTTTGACTCCAGGCTCCATACTCCTATG

TACTTTTTCCTCAGCAACTTGTCCTTCATGGATATCTGCTTCATAACGGTCATTGTGCCC

AAGATGCTGGTGAACTTACTATCACAGACAAAGATTATCTCCTACGTGGGCTGCCTGGTC

CAGATGTACTTATTCATAGCCTTTGTGAATACTGACAGCTACCTGCTGGCATCCATGGCC

ATAGACCGACTGGTGGCTATTTGCGACCCCTTCCATTATGATGTGGTCATGAACCCATGG

CGTTGTCTTCTCATGTTACTGGGTTCTTGCACCATATCTCACCTGCACGCCTTGCTCCGT

GTGCTGCTCATGTCTCACCTGTCTTTCTGTGCCTCCCATGTCATTCAGCACTTTTTTTGT

GACACCCAACCTGTGCTAAAGCTGTCCTGCTCTGACACCTCCTCCAGCCAGATTGTGGTC

ATGACTGAGACCCTGGCTGTCATTGTGACACCTTTCTTGTGCATACTCTTCTCCTACATG

CGGATAATCATCACTGTTCTCAGAATCCCCTCTGCATCTGGGAAGTGGAAGGCCTTCTCT

ACCTGTGGCTCCCACCTCACTGTAGTAGCTCTGTTCTATGGGAGTGTCATCTATGTTTAT

TTTAGGCCCCTGTCCATGTACTCAGCAGTGAAGGACCGAGTAGCCACAGTTACATACACG

GTGGTGACACCCATGTTGAATCCTTTCATCTACAGCCTGAGGAACAAGGATATGAAGAGA

GGTTTGGGAAAGTTAAGGGACAGAATTCACTCATAG

>LoafORs6.13

ATGGGAATGTTTAACTTAACAAGACTCTCTGAATTCATCCTTTTGGGACTTTCTTCTCAG

CCTGAAGACCAGAAACCACTCTTTGCCCTCTTTTTCATAATCTACCTCGTCACCTTAATG

GGAAACTTGCTCATTATTTTGGCCATCCGCTCTGATCCTAAGCTCCAAAATCCCATGTAT

TTCTTTCTAAGTATCTTGTCTTTTGCTGACATTTGCTACACGACAGTCATAGTCCCCAAG

ATGTTGATGAACTTCTTATCAGAGACTAAGACTATTGCCTATGCTGAATGTCTGACACAG

ATGTATTTCTTCCTAGTCTTTGGAAACATGGACAGTTATCTCCTGGCAGTGATGGCCATT

GACCGCTATGTAGCTATTTGTAATCCTTTCCACTATGTCACTGTTATGAGCCACAGACGC

TGTGTGTTGCTACTGTCATTTTCCATTGCTTTCTCCTGTCTCCACTCCCTCCTACATGTC

CTCCTGGTGAATCGCCTCACCTTTTGTGCTTCAAATGTTATCCATCACTTTTTTTGTGAT

GTTAGCCCAGTTCTGAAACTGTCCTGCTCTTCTACCTCCATCAGTGAACTTGCGGCCATG

ACGGAAGGGTTGGCCTCTGTGATGGCTCCTTTTGTCTGTATCATCATCTCTTATCTGCAA

ATCCTCATTGCAGTTCTCAAGATGCCCTCAGCTGCTGGAAAACACAAAGCCTTCTCCACC

TGCAGCTCTCATCTCACTGTGGTCACTCTATTTTATGGAACAATTATCTATGTCTATTTC

CAGCCCTTGTCCAGCTATACTGTTAACGACCGGATAGCAACAATCATCTACACAGTATCG

ACATCGATGTTAAACCCATTTATCTACAGTCTAAGGAACAAAGACATGAAACGGGGCTTA

GAGAAATTGATAAGCAGGATTAAGTCTCAAACGGATAAGCTTTCTTCTACAGAATCTAAC

AAAATCCCTGGACCATGA

>LoafORs6.14

ATGGGATGGAACAACTTAACAAGACCCTCTGAATTCATCCTCCTGGGGATATCCTCTAGG

CCTGAGGATCAGAAGCCTCTCTTTGTCTTCTTTCTAACTGTCTACCTCATCACCGTGATG

GGAAACCTGATCGTTATCTTGGCCATCCATTCAGATACTCGCCTACAGACCCCCATGTAT

TTCCTTTTGAGCATCCTTTCCTTTGTTGACCTTTGCTACACAACAGTCACTATTCCAAAG

ATGCTGATAAGCTTCTTATCAGAAACAAAGACCATTCCCTATGGTGAGTGCCTGACCCAG

ATGTACTTCTTCCTATCTTTTGGTAATGTAGATAGTTACCTCCTAGGGGCCATGGCCATT

GACCGCTATGTGGCCATAAGCAACCCTTTTCATTACATCACTATCATGAGCCATAAACGC

TGTATCCTGCTCCTGGTCATCTCCTTCTGCATCCCATTACTCCACTCACTCCTGCATGTC

TGCCTGATTAGTCAGCTCCTCTTCTGTGATTCCAATGTTATCCATCACTTCCTCTGTGAT

GTCAACCCAGTGCTGAAGTTGTCTTGCTCATCTACATTTGTCAATGAAATAGTGATAAAG

ACAGAAGGACTATCTGTCACACTGACCCCCTTTTCATGCATCATCTTCTCTTATCTGAGA

ATCCTCATCACTGTTCTGAAGATCCCTTCAGCTGCTGGGAAGCACAAAGCCTTCTCCACC

TGTGGCTCTCATCTCACAGTGGTTACTCTGTTTTATGGAAGCATTAGCTATGTCTATTTC

CAGCCCCTGTTCAACTATACTGTTCAGGACCGAATAGCAACACTCATCTACACAATATTG

ACACCGATGTTGAACCCGTTTATCTACAGTCTGAGAAACAAAGACATGAAGCAGGGTTTG

GCAAAGCTGATGGACAGGGTAAAGTCGATTTGA

>LoafORs6.15P

TACTAGATGACTAAGACACTGTCTTTCATAGACATCTACTTTACAAATTTCATTTTGCCA

ATGTTGATGGCAAACACGTTGAGCAAGAGCAAGAAGGTGCCTTTTGCCCAGTGTATCACC

CAGATGTATTTCTTTGTGGCCTGAGCAGTCCCTGACAGCTTCCTCCAGGCTGCTATGGCC

ATTGCTCACTATGTGGCCACCTATAACCCACTGCATTACACCAAGACCATGAACCCCAGA

TGCTGCCTCCTGTTGGTGATGGCTTTGCAAGTGGTATCACAGCTCCACTCAGTAACCCAC

ACAATTCTTATTGCCCACTGCTCCTTCTGTGGATCCAATACGATCCACGATTTCTTCTGC

AACGTCCAGCCATTGCTAATGCTCTCCTGCTCTGACACCTCTGTCAATGAACTTTTTGGC

CTTCACAGAGGGCTCCTT/TTGGCCTTCACAGAGGGCTCCTTTGTGATCATGAGTCTCTT

TATCTTCATTATTATGTCATGTATCTAAATTACTCATGCTGTTTTGAGGGTTACTTCAGG

AGGAAGCAGGTACAAGGTCTTCTCCACCTGTAGATCCCACCTCATGCTTGTGGTACTCCA

CTATACAACTACCATCTTAGTGTACATTCACCCCTCATCCACCTACTCAGTGACAAAGGA

CCATGAGGCCACT

>LoafORs6.16P

ATGGTGAAAAAGAACCACAGTAGCAGCACTTCAGGCTTCATCCTTCTGGGCCTCTCCTCC

AACCCTCAGCTGCAGAAGCCTCTCTTTGCCGTCTTCCTCACCAGGTAACTGGTCACCATG

GTGCGGAAGGTGCTCATCATTCTAGCCATCCACTCTGACTCCAGACTCCATACCCCTATG

TACTTTTTCCTCAGCAACTTATCCTTCATGGATATCTGCTTCATAACGGTCATTGTGCCC

AAGATGCTGGTGAGCTTACTATCACAGACAAAGATTATCTCCTACATGGGCAGCCTAGTC

CAGATTTACTTCTTCACAGCCTTTGTGAATACTGACAGCTACCTGCTGACATCCATGGCC

ATAGATCAGCTAGTGACCATCTGCAAACCCTTCCATTATGATGTGGTCATGAACCCATGG

CATTGCCTTCTCATGTTACTGGATTCTTGCACCATATCTCACCTGCATGCCTTGCTCTGT

GTGCTGCTCATATCTCACCTGTCTTTCTGTGCCTCCCATATCATTAAGCACTTTTTTTGT

GACACTCAGCCTGTGCTAAAGCTGTCTGCTCTGACACTTTCTCCAGCCAGA

>LoafORs6.17

ATGGGGAAACCAGGCAGAGAGAACCAAACCACTGTTTCAGACTTCCTCCTTCTAGGACTC

TCTGAGCAGCCGGAGCAGCAGCTTCTCCTATTTGGCATCTTCCTGGGCATGTACCTGGTC

ACTATGGTGGGGAACCTGCTCATCATCCTGGCCATCAGCTCTGACTTACACCTTCACACT

CCTATGTACTTCTTTCTGGCCAACCTATCATTAGCTGATGCCTGTTTCAGTTCTACTTCA

ATCCCCAAAATGCTGGCGAACATTTATAGTCAAAGCCAGACCATTTCCTATTCTGGGTGC

CTTACACAGCTGTATTTCCTTATCACATTTGGTGGCCTTGACAATTGCCTCCTGGCTGTG

ATGGCATATGACCGCTATGTGGCTATCTGCCAGCCACTCCATTACAGCACAGCTATGAGT

CCCAAACTTTGTGCACTAATGCTGGGCATGTGCTGGCTGCTAACCAACTGCCCTGCCCTG

ACGCACACACTGCTGCTGACTCGTCTGGCTTTCTGTGCCCAGAAAGCTATTCCCCACTTC

TACTGTGATCCCAGTGCCCTACTGAAACTTGCCTGCTCAAATACCCACATTAATGAGCTG

ATGATCATCACTATGGGCCTGATGTTTCTCACTGCTCCCCTCCTGCTGATTGTCCTCTCC

TATGTCCGTATTTCCTGGGCTGTGTGTAGCATCTCATCTCCTGGGGGGCAGTGGAAGGCC

TTCTCCACCTGTGGCTCTCATCTTACAGTGGTTCTGCTCTTCTACGTGTCTCTTATGGGT

GTGTATTTACTTCCTCCATCAACTCACTCTACCGAGAGGGCGAGTAGGGCTGCCATTCTC

TATAACGTGATTATTCCCATGCTAAACCCATTCATCTATAGCTTAAGAAACAAAGACATG

AAGGCGGCTTTGCGTAAACTTTTTGGCAGTGGGAAAACATTCTTCTTACCATGA

>LoafORs6.18P

ATGCTGAGGGTAAACCAGGGCCACATCACTGAATTCCTCCCCCTGGGTTTTAGCACTGAC

CCCAAACACCAAACGTGGCTCTTTGCCAGCTTCCTGGCCATGTACCTAATCAATATGTTT

GGCAACTCAGTCATCATTACAGCCATCCGTGGGGATGCCCACCTCCATACTCCCATGTAC

TTCTTCCTCTCCAACCTGTCTTTCATGGATGTCTGCTTTAAAAATGTCATTTTGCCAGTG

ATGTTGGCAAACACGTTAAGGGCAAGAGGGTGCCCTTTGCCCACTGTATCACCCAGATGT

ATTTCTTTGTGACCTGAGCAGTCACTGACAGCTTCCTCCAGGCTGCTATGGCCATTGCTC

ACTATGTGGCCACCTATAACCCACTGCATTACACCAAGACCATAAGCCCCAGATGCTGCC

TCCTGTTGGTGATGGCATCATGGGTGGTGTCACACCTCCACTCAGTGACCCACACAATTC

TCATGGCCCGCCTCTCCTTCTGTGGGTCCAATATCATCCACCATTTCTTCTGTAACATCC

AGCCATTGCTAATGCTCTCCTGCTCTGACACCTCTGTCAATGAACTTTTCGGCCTTCACA

GAGGGCTCCTTTGTGATCACGAGCCCCTTTATCGTCATTATTGCATCCTATGTCTACATC

ACCAGTGCTGTTTTGAGGGTTCCTTTTGGAGAAGGCAGGTACAAAGTCTTCTCCACCTGT

AGATCCCACCTCATGGTTGTGGAAGTCTACTATACAACTACCATCTTAGTGTACATTCAC

CCGTCATCCACCTACTCAGTGACAAAGGAC

>LoafORs6.19P

ATGGAGATAAAGAACTACAGCAGCAGCACTTCAGGCTTCATCCTTCTGGGCCTGTCCTCC

AACCCTCAGCTGCAGAAGTCTCTCTTTGCCATCTTCCTCACCATGTACCTGGCCACCATG

GTGGGGAATGTGCTCATCATTCTAGGCATACATTCTGACGCCAGGCTCCATACCCCTATG

TACTTTTTCCTCGGCAACTTATCCTTCATCGATATCTGCTTCATAACAGTCATCGTGCCC

AAGATGCTGGTGAACTTACTATCAGAGACAAAGATTATCTCCTACATGGTCTGCCTGGTC

CAGATGTATTTCTTCATATCCTTTGTGAATACTCACAGCTACCTGCTGGCATCTATGGCC

TTAGATCGACTGGTGGCCATCTGCAACCCCTTCCATTATGATGTGGTCATGAACCCACAG

CGTTGTGTTCTCGTGTTACTGGGATCTTGCACCATATCCCACCTGCACTCCTTGTTCTGT

GTACTGCTTCTGTCCCACCTATCTTTCTGTGCCTCCCACATTATTCAGCACTTTTTT/TC

CAGCCAGACTGTGGTCATGACTGAGACCCTGGCTGTCATTTTGACCCCTTTCCTGTGCAA

CCTCTTCTCCTACATGCAGATAATCATTACTGTGCTCAGAATCCCCTCCACAGCCAGGAA

GTAGAAGGTCTTCTCTACCTGTGGCTCCCATCTCACCATAGTAGCCTTGTTCTATGGGAG

TAACATCTATGTTTATTTTAGGCCCCCATCCTTGTACTCAGCAGTGATGGGCTGAGTAGC

CACAGTTATGTACACAGTGGTGACACCCAGGTTGAAACATTTCATTTCCAGCCTGAGGAG

CAAGGATATGAAGAGAGGTTAGGGGAAGTTAAGGAACAGAATTCACTCA

>LoafORs6.20

ATGGGGAAACCAGGCAGAGAGAACCAAACCACTGTTTCAGACTTCCTCCTTCTAGGACTC

TCTGAGCAGCTGGAGCAGCAGCTTCTCCTATTTGGCATCTTCCTGGGCATGTACCTGGTC

ACTGTGGTGGGGAACCTGCTCATCATCCTGGCCATCAGCTCTGACCCACACCTTCACATT

CCTATGTACTTCTTTCTGGCCAACCTATCATTAACTGATGCCTGTTTCAGTTCTACTTCA

ATCCCCAAAATGCTGGCGAACATTTATAGTCAAAGCCAGACCATTTCCTATTCTGGGTGC

CTTACACAGCTGTATTTCCTTATCACATTTGGTAGCCTTGACAATTGCCTCCTGGCTGTG

ATGGCATATGACCGCTATGTGGCTATCTGCCAGCCACTCCATTACAGCACAGCTATGAAT

CCCAAACTCTGTGCACTAATGCTGGGCATGTGCTGGCTGCTAACCAACTGCCCTGCCCTG

ACGCACACACTGCTGTTGACTCGTCTGGCTTTCTGTGCCCAGAAAGCTATTCCCCACTTC

TACTGTGATCCCAGTGCCCTACTGAAACTTGCCTGCTCAAATACCCACATTAATGAGCTG

ATGATCATCACTATGGGCCTGATGTTTCTCACTGCTCCCCTCCTGCTGATTGTCCTCTCC

TATGTCCGTATTTCCTGGGCTGTGTGTAGCATCTCATCTCCTGGGGGGCGGTGGAAGGCC

TTCTCCACCTGTGGCTCTCATCTCACAGTGGTCCTGCTCTTCTATGGGTCTCTTATGGGT

GTGTATTTACTTCCTCCATCAACTCACTCTACTGAGAGGGCCAGTAGGGCTGCCATTCTC

TATATGGTGATTATTCCCATGCTAAACCCATTCATCTATAGCTTAAGGAACAAAGACATG

AAGGAGGCTTTGCGTAAACTTTTTGGCAGTGGGAAAACATCTCTCTTACCATGA

>LoafORs6.21

ATGGGAATGTTTAACCTAACGAGACTCTCTGAATTCATCCTCTTGGGTCTTTCCTCTCGG

CCTGAAGACCAGAAACCACTCTTTGCTCTCTTTTTCATAATTTACCTTGTCACCTTAATG

GGAAACTTGCTCATCATCATGGCCATCCGCTCTGATCCTAAGCTCCAAAACCCCATGTAT

TTCTTTCTAAGCATCTTGTCATTTGCTGACATTTGCTACACGACAGTCATAGTCCCCAAG

ATGTTGATGAACTTCTTATCAGAGACTAAGACTATTGCCTATGCTGAATGTCTGACACAG

ATGTATTTCTTCCTAGTCTTTGGAAACATGGACAGTTATCTCCTGGCAGTGATGGCCATT

GACCGCTATGTAGCTATTTGTAATCCTTTCCACTATGCCACTGTTATGAGCCACAGACGC

TGTGTGTTGCTACTGTCATTTTCCATTGTTTTCTCCTGTCTCCACTCCCTCCTACATGTC

CTCCTGGTGAATCGCCTCATCTTTTGTGCTTCAAATGTTATCCATCACTTTTTTTGTGAT

GTTAGCCCAGTTCTGAAACTGTCCTGCTCTTCTACTTCCATCAATGAACTTGTGGCCATG

ACAGAAGGGCTGGCCTCTGTTATGGCTCCTTTTGTCTGTATCACCACTTCTTATCTGCAA

ATCCTTATCGCAGTTCTCAAGATGCCCTCAGCTGCTGGAAAACGCAAAGCCTTCTCCACC

TGCAGCTCCCATCTCACTGTGGTCACTCTATTTTATGGAAGCATTAGCTATGTCTATCTC

CAGCCCTTGTCCAGCTATACTGTTAAGGACAGGATAGCAACAATCATCTACACAGTATTG

ACATCGATGTTAAACCCATTTATCTACAGTCTAAGGAACAAAGACATGAAACGGGGCTTA

GAGAAATTGATAAACAGGATGAAGTCTCAAATGGATAAGCTTTCTTCTACAGAGCCCAGT

GAAATCCGTGGACCCTGA

>LoafORs6.22P

ATGTGCTCTGCCCCTAATGTTTCACATTCTCCAGTCTTCCTGATTCTTGGGCTCTCTAGA

GCCAGAGTCCCCCACAGTCTCCTGTTTCTCCTGCTCCTATTTACCTGACTCCCATAATGA

GGAACATGACTCTGGTGTTGCTTATCTACCTGGACATCAGGCTCCAGTTACCTATGTACT

ATCTACTTAGTGGCCTCTCTGTGTTGGACTTGGGGCTGTCCACAGTCACCCTGCCTCAGT

TATTGTCCAGTCCAGTCTCTGATTACCCAGGCATTCCTACTGCCTGCTGCTTGGTCCAAT

GTTTTCTTCTATGCATTTGGAATTACAGACACACTTATCATTTCTGTCATGGCTCAGAAT

TGCTATGTAGCCATCTGTGACCCTCTGCACTGCCATTTGGTGATGAATCAGCAATTCTGT

GCCCACTGAGTGGCCTTTAGCTGGGTGGTATCCATGCTATATACCATGTTGCATGTAGGA

CTCTTTCTGCCCCTCTGCTGGGTTCTGGATGATGGGGAAATGTTAACTTCCCTTACTTCT

TCTGTGACCATGGAGCACTTCTTCAAGCCTCTTGCCAGA

>LoafORs6.23T

TTACCCAACCATTCCTGCTGACCGCTGCTTGGCCAGTTCTTTTTCTTCTATGCATTTGGA

GTTACGGACACACTTGTCATTGCTGTCATGGCTCTAGATCGCTATGTTGCCATCTGTGAT

CCTCTGCATTATACTTTGGTGATGAATCGGCAACTCTGTGCCTGCTTACTGACCTTTAGC

TGGGTGGTATCCACACTGCACACTATGCTACATGTGGGACTCCTCTTACCCCTTCGATGG

GTTGGGGATAATTGGGACAACGTTAACCTTCCCCACTTCTTCTGTGACCACCGACCACTT

CTGCGAGCCTCTTGCTCAGACACGCATTCCAATGAGCTAGCCATATTCTTGGAGGGTGGC

TTCCTTATGCTGGGCCCCTGTTCCCTCATTGTGCTTTCCTATGTTCACATTGGGGCCACC

ATCCTTCGTTTGCCTTCAGCTGCTGGTCGTCGACGTGCGGTCTCCACCTGTGGGTCCCAT

CTCACTATGGTTGGGTTCCTCTATGGTACCATTATTTGGGTCTACTTCCAGCCTCCTTCA

CAGGAATCTCAGGACCAAGACATGGTGGCTGCAGTGATGTACACAACCATCACACCCTTG

GCCAACCCGTTTGTATACAGTCTCCGCAATAAGGATGTAAAGAGTGCGCTCCGCAGACTG

CTTGGCCGGGGGAGGGTGGACTCCTGA

>LoafORs6.24

ATGGCCATGATAAACAGGACAGAAGTGACTGAATTCATCTTATCAGGCCTGTCCAATTGG

CCAGAGATGCAACCAGTCATTTTTGGGATTGTTCTTGCCATGTACCTGGTAGCAGTTGTT

GGCAATGCTCTTGTGGTAATTGCTGCCCACTTAGACACCAAGCTTCAGACACCCATGTAT

TTCCTTCTCAGCCAGCTTTCCTTTGTCGACATATTTCTGACAACCATCACTGTGCCCCAG

ATGCTGGTGCACACACTGTCTGTGGATCGAACCATCTCCTTTAATCGCTGCATGGTTCAG

TTGTTTTTCTTTATGACTGTGGGCAGCATGGAAGGTCACCTGTTGGCTGCCATGGCCTAT

GACCGCTATGTTGCCATCTACAATCCTTTAAGATACTCTACCATTGTTAGCCGCCACCTC

TGTCTGCGCATAACCTTGACCTCATGGGTGGTTGTCAACCTCAACAGCCTCCTTTACAGT

ATGCTGGTCAGCCGCTTAACCTTTTGTGGCAACCAGGTCACCCACTTCTTCTGTGATATC

ACGCCCCTACTGCAGCTCTCCTGCACCCGACCAGTGGTCAATGAAATGCTAATCTTCACG

GAGGGTGTAGCTGTGGTGGTCAGCCCTTTCTTCTTCATTTTGGGCTCCTATGCCCACATT

GGTGTTGCTATAGCCCGCATGCACTCTGTTGCTGCCTTGCGCAAAGCCTTGTCCACCTGT

AGCTCTCATATCCTGGTTGTGCTGCTCCTGTATGGCTCTGTGATCCGAATGTACCTCCGG

CCATCCTCTGGCTATGATCTGGACCAGGACCACTACGTCGCCATTTTCTACACAGTGGTT

ACCCCTATGCTAAACCCACTCATCTACAGCCTAAGGAACCAGGAGGTTAAGGGTGCTCTG

TGGAGGCTTGGCAAGAAACTCTGCATCTCGGGAAACTTCCAACCTGGCTCACAGGCAAAC

AGAAAATGGCAGCAGATCTCTTGA

>LoafORs6.25

ATGGAAAAAACCAACTGGACCAGTGTATCCCATTTTGTTCTCTTGGGCATTTCTACCTTC

CCAGAAGAGCAGACCCCACTCTTCCTTCTTTTTCTACTCATGTATGCAATCAATATTTCT

GGCAACTCTGCAATTATCACACTGATTATCTCTGTTCCGCACCTCCACACTCCCATGTAC

CTCTTCCTCAGTAACTTGGCATTGGCAGATATCTGTTTCACCTCCACCACAGTCCCCAAG

ATGCTGCAAAACATTTTCTCTGCTACAAAGGCCATTTCCTACATGGGCTGCCTAGCCCAG

ACTTATTTCTTCATTTGCTTTGCAGCAATGGAAAATTTCCTCCTGGCTGTGATGGCTTAT

GACAGGTACATTGCCATCTGCCACCCTTTCCACTACCCTCTGATCTTGACCAGAATGCTG

TGTGCACAAATGGTGGCTGTGTGCCATGTCCTTTCCCACCTTCATGCCTTGCTGCATACC

CTACTTATGGGCCAACTGATCTTCTGTGAAGATAACAGGATCCCACACTTCTTCTGTGAC

CTCTACCCTCTGATGAAGATTTCTTGTTCCAGTACCCACCTCAACACCCTGATGATTCAC

ACAGAGGGTGTTATTGTAATCAATGGAGCTTTGGCCTTCATCATTGTTTCCTATGCCTGC

ATCATCTCAGCAGTCCTCCGGATCCCCTCTGCCAATGGCAAGTGGAAAGCCTTTTCTACC

TGTGGCTCCCACCTCACTGTGGTGGCCATATTCTATGGCACTCTCACATGGGTCTACTTC

CGACCTCTTTCCAGCTACTCAGTGGCCAAAGTTCGCATTGTGACAGTCATGTACACAGTG

GTGACACCCATGTTGAACCCTTTCATCTATAGCCTGAGGAATGGGGATGTCAAGGAAGCC

TTCAGGAAATGCGTGAGCAGAATATGGAATAAACCCCAAAAAGCAGTTATAAGCTTTCCC

TAG

>LoafORs6.26

ATGGACAGAAGAAACCAGACTAGCGTCTATGAATTCCTCCTCCTGGGACTCTCTGAGCAT

CAAGAACAGCAGCCTCTCCTGTTTGGGCTCTTCCTGGGCATGTACCTGGTCACTGTGGTG

GGAAACCTGGTCATCATCCTGGTCATTGGCTTTGATATGCACCTCCATACCCCCATGTAC

CTCTTCCTGGCCAACCTCTCCATTTCTGACATTGGTTTCATCTCTACAATAATCCCCGAG

ATGCTAGATAATATTTGCTCAGGAAGTAAATTGATTTCTTATGGTGGATGCCTGACACAG

CTCTATTTCTTTGGCTTATTTGCAGATCTGGACAACTTTCTCCTGGCTGTGATGGCACTT

GATCGTTATGTGGCCATCAGCCACCCCCTCCACTATGCCATGATCATGAATTCCCAACGT

TGTGTCCTGTTGGTGGCTGGGTCTTGGGTGGTTATTACCTTCCATGCCCTGGTGCATGCA

TGCCTTGTGACCAGGCTTTCTTTCTGTGGCCCCAATATTATTCCCCACTTCTTCTGTGAT

CTGGTTCCTGTCCTGAAGCTGGCCTGCTCCAGGACTTATGTCAATGACCTGGTGCTCATC

CTTGTGGCAGGAACATTGCTTATTGGACCCTTTGTCTGCATCCTTACATCTTACTTTTAC

ATTGTACTGGCAATCCTGAGAATTGATTCTCCAAAGGGTAAGCAAAGGGCCTTCTCCATC

TGCACTTCTCACCTCTCTGTAGTTTCTCTGTTCTACACAACAGCTATTGGGGTCTATTTA

TATCCTCCAACACCCTATTCAGGTGGGAAGGAGAGAGTCTTCTCAATAATGTATACAACG

GTAACCCCCATGCTGAACCCCTTTATCTACAGCTTGAGAAACAGAGATATGAAGGGGGCA

TTGGGGAAACTACTCAGAATAAAAACATTCTAA

>LoafORs6.27

ATGGACAAAAACAACCAGTCTAGTGTCTCTGAATTCCTTCTCTTCGGTCTCTCTGAGAAG

TCAAACCACCAACCTCTCCTATTTGGCATCTTCCTGGCCATGTACCTGGTCACTGTCATG

GGCAACCTGCTAATCATCCTGGCCATTGGTTTTGACCCACAGCTCCACACCCCCATGTAC

TTCTTCCTGTCCAACCTCTCTTTTGCTGATGCCTGCTTTTCTACCACCACAGTCCCCAAG

ATGCTGGTGAACATCCAGACGCATAGTCAGACCATACTCTATGGGGGGTGCTTAGCCCAG

ATGCATTTTTTCATGACATTTGGGGCTCTGGATGACTTCCTTTTAGGGGTGATGGCCTAT

GACCGCTATGTAGCCATCTGCAGCCCTCTTCACTATTCCACAGTCATGAGTTCTCTTGTG

TGCTTGCTCCTTCTTGCACTATGCTGGGTTCTCACCACCCTTGCTGCCCTCTTACACACC

CTGCTCATGGTTAGGCTATCTTTCTGTGCAGACAACACTATCCATCACTTTTTCTGTGAC

GTGGTCCCTCTGCTGCAGCTCTCCTGCTCAGAAACCAGCACCAATCAGATGACCCTGTTC

CTTGTGGGCTCCATGATACTCACTGGTCCTCTTTCACTGATCATCCTGTCATATGCACAT

ATCATCTCCACCATCCTCAGGGTCCCATCTGCCTCTGGCAGACAAAAGGCCTTCTCCACC

TGTGGGTCTCACCTCACAGTTGTCTTCCTGTTCTATGGCACAGCAATTGTTGTCTACCTG

TGCCCCACTTCTTCACACTCAGGGGGAAAAGATAGAATTGCAGCTGTATTTTACACAGTG

GTGACCCCCATGCTAAATCCTTTCATCTATAGCCTTAGAAACAAGGATATGAAGAGAGCA

CTGAGCAGACTTAGTGGCCTGAACACACTTTCTTCTCTAACTTTACGTCCAGGTTACATC

CAGGAAGGCCCACATGCTCAGGAAGTAGTAGCCCTCCCTTCAACCTCATATGAATAG

>LoafORs6.28

ATGGACAGAAGCAACCAGTCTAGTGTCTCTGAATTCCTCCTCTTGGGGCTCTCTGAGAAG

CTAGACCAGCAGCCTCTCCTATTTGGCATCTTTCTGGCCATGTACCTGGTCACTGTTGTG

GGCAACATGCTCATCATCCTGGCCATCAGATTTGATCTGCACCTCCACACCCCCATGTAC

TTCTTCCTGTCCAACCTCTCTTTTGCTGATGCCTGCTTTTCCACCACCACGGTCCCCAAG

ATGCTGGTGAACATCCAGACACATAGTCAGACCATACCCTATGGGGAGTGCTTAGCCCAG

ATGCATTTTTTCATGACATTTGGGGCTCTGGATGACTTCCTTTTAGGGGTGATGGCCTAT

GACCGCTTTGTGGCCATCTGCAGGCCTCTTCACTACCCTACAGTCATGAGTCCTCTTGTG

TGTGTGCTCCTTCTTGCAGCATGCTGGATTTTCACTAACCTTGCTGCCCTCTTACACACC

CTGCTCATGGCTAGGCTATCTTTTTGTGCAAGCAACACCATCCATCACTTCTTCTGTGAT

ATACTCCCTCTGCTACAGCTCTCCTGCTCAGAAACCAGCACCAACCAGATAGCCCTGTTC

CTTGTGTGCTCCATGATACTCACTGGTCCTCTTTCACTGATCATCCTGTCATATGCACGT

ATCATCACCACCATCCTCAGGGTCCCATCTGCCTCTGGCAGACAAAAGGCCTTCTCCACT

TGTGGGTCTCACCTAACTGTTGTCTTTTTGTTTTATGGCACAGCAATTGGTGTCTATTTG

TACCCCCCTTCCTCACACTTAGGGGAGAAAGAAAAGGTTGCAGCTGTATTTTACACAGTG

GTGACCCCCATGTTGAACCCCTTCGTTTATAGCCTCAGAAACAGTGACATGAAAACTGCA

CTGAGAGGGCTTTTTGGAATTAACACACTCTCTTCTCAGGGACTTTAA

>LoafORs6.29

ATGAAACCAGAAAACCATACCAGTGTCTCTGAATTCCTCCTCCTGGGCCTCTCTGAGCAG

CAGAAGCAGCAGCCTTTCCTCTTTGGTATCTTTCTGGGCATGTACCTGGTCACTGTGGTG

GGAAACTTACTCATCATCCCGGCCATCAGCTCAGATCCACACCTCCACACCCCCATGTAC

TTCTTCCTGGCCAACTTCTCCTTCACTGACCTGTGTTTGTCATCTACCACCGTTCCCAGG

ATGCTGGTGAGCATCCAGGCTCACAAGAACACTATCCCCTATGCTGGATGCCTGTCTCAG

GTCTACTTCTTCCTGTGGTTCATTGGTCTAGATGTTTTCCTCCTGGCGGTGATGGCTTAT

GACCGGCTTGTGGCTATCTGCCACCCTCTTCACTACACCTTGGTCACGAGTCCCAGGCGC

TGCATCCTGCTGGTGGCTATGTCTCTAATACTTGCTCAATTATACTCTCTAACTCACACA

ATTCTCCTGACTCAGTTATCCTTCTGTGCTGGCAACGTCATTCCGCACTTCTTTTGTGAA

CTTCTCCCCCTGTTGAAGCTCTCTTGTTCCAATACTTATGCTAACCAATGTGTGCTGATG

TACTGGGGAGGGGCATTAACCATCTTGATCCCACTGCTAATCATCACTTCTTACATCCGT

ATCGTGGCTGCCATTGTGAGGGTCCCATCGGCAAGTGGGAAGTGGAAGGCCTTCTCCACC

TGTGGCTCCCACCTCTCAGCAGTTTGCTTGTTCTATATGTCTGCTATTGGAGTGTACTTC

ATTCCCTCCATCGCTGACTCAGCTGGCAAGGACAGGATTGCAGTAGTGATGTATGCTGTG

GTGACACCCATGCTGAACCCATTCATCTACAGCCTCAGAAACCAAGACATGAAGGGTGCC

TTGGAGAGACTCTTGAGCAGGAGGGTACTACAATCTCCATGA

>LoafORs6.30

ATGGGGAAACCAGGCAGAGTGAACCAAACTACTGTTTCAGACTTCCTCCTTCTAGGACTC

TCTGAGCAGCCGGAGCAGCAGCTTCTCCTATTTGGCATCTTCCTGGGCATGTACCTGGTC

ACTGTAGTGGGGAACTTGATCATCATCCTGGCCATCAGCTCTGACCCACATCTTCACACT

CCTATGTACTTCTTTCTGGCCAACCTGTCATTAGCTGATGCCTGTTTCAGTTCTACCTCG

ATCCCCAAAATGCTAGCCAACATTTATACTCAAAGCCAGGCCATTTCCTATTCTGGGTGC

CTTACACAGCTGTATTTCCTTATCACATTTGGTGGCCTTGACAATTGCCTCCTGGCTGTA

ATGGCATATGACCGCTATGTGGCTATCTGCCAGCCACTCCATTACAGCACAGCTATGAGT

CCCAAACTCTGTGCACTAATGCTGGGCATGTGCTGGCTGCTAACCAACTGCCCTGCCCTG

ACGCACACATTGCTGATGACTTGTCTGGCTTTCTGTGCCCAGAAAGCTATCCCCCACTTC

TACTGTGATCCCAGTGCTCTACTGAAACTTGCCTGCTCGGATACTGGCATTAACGAGCTG

ATGATCATCACTATGGGCCTGATGTTTCTCACTGCTCCCCTCCTGCTGATTGTCCTCTCC

TATGTCCGAATCTCCTGGGCTGTGTTTAGCATCTCATCTCCTGGGGGGCGGTGGAAGGCC

TTCTCCACCTGTGGCTCTCATCTCACAGTGGTCTTGCTCTTCTTCGTGTCTGTTATGGGT

GTGTATTTACTTCCTCCATCAACTCACTCTACAGAGAGTGAGAGTAGGGCTGCCATTCTC

TATAATGTGGTTATTCCCATGCTAAACCCATTCATCTATAGCTTAAGGAACAAAGACATG

AAGGCAGCTTTGCGTAAACTTTTTGGCAGTGGGAAAACATCCCTCTTACCATGA

>LoafORs6.31P

CCTCGTGTACTTCTTTTTGGCCAACTGTCTTTTGTTGACATGGGTTTGACAACCTCCACA

GTTATGAAGATGCTGGTAAATGTACAGACGCAGCATCATACCATCTCCTATACTGGCTGC

CTTACCCAAATGTATTTCTTTCTGATGTTTGGTGATCTGGACAGCTTCTTCCTGGCTGTC

ATGGCATATGACCGCTATGTGGCCATTTGCCATCCTCTCTGTTACTCCACAGTCATGAGC

CCCCGAACCTGTGTCCTGCTGCTTCTACTGTGCTGGGTCCTCACCACCATTGTAGCCCTG

ACTCACACCCTCTTCATGACTCAGCTGTCTTTCTGTGCTATTGGGGAGATTTCTCACTTT

TTCTGTGACATAACTCCTGTCCTGAAGCTGTCATGTTCTGATATCCAAATCAATGAGTTG

ATGGTTTTTGCCTTAGGAGGCACAGTACTCATTGTCCCTTTTATATGCATTGTCATCTTC

TACATCTACATTGTATCAGCTGTCCTGAAAATTCAAACACCTGGTGGTGGAGGTAGCAAG

GCCTTTTCCACCTGCAGCTCCCATCTCTATGTTGTCTGTGTGTTCTACGGGACCCTCTTC

AGTGCCTACCTGTGCCCTTCCTCTGTTGTCTCAGAAGAGAAGGACGTTGTAGCTGCTGCT

GTGTACACTGTGGTGACTCCCATGTTGAACCCCTTTATCTATAGCCTAAGGAACAAGGTC

ATGAAGGGGGCCCTCAAGAGGCTCCTCAGTCGCAGAAGGATTTTCTTCTCT

>LoafORs6.32

ATGAGGTGGGAGAATCAGAGCAGCACATCTGAATTCCTTCTTCTGGGGTTCCCCATCCAG

CTGGAGCAGCAGGGCATGTTCTTCACCCTGTTCCTGGTGATGTACCTCACCACCGTGCTG

GGGAACCTGCTCATCATCCTGCTTATCAGGGTGGACCCTCGCCTTCACACCCCCATGTAC

TTCTTCCTCAGCCACTTGGCCTTCACTGACATCTCTTTCTCATCTGTAACTGTCCCTAAG

ATGTTAATAAACATGCAGACTCGGAATCAATCCATCCCCTATTCAGGGTGCATAGCACAG

ATGTATTTTTTCATACTTTTTACAGATCTGGACAATTTCCTCCTCACCTCAATGGCATAT

GATCGGTACGTTGCCATCTGTCACCCCCTCCACTATACCACCATCATGAGGGACTGGCTG

TGTACCCTACTTGTAGCTGTGTCCTGGATTCTGTCCTGTGCCAGTGCCCTGTCTCACACC

ATCCCCCTGGCCCATTTGTCCTTCTGTGCTGACAAAACCATCCCCCACTTCTTCTGTGAC

CTTGCTGCCCTGCTCAAGCTGTCCTGCTCAGACACCTTCCTCAATGAGATGATCATTTTC

ACAGCTGGAGTGGCAGTCATTGCCCTCCCACTAATGTGCATCCTTGCCTCTTATGGCCGC

ATAGGGGCCACCATCCTGAAGGCTCCATCTACCAAAGGGGTCTGCAAAGCCTTTTCCACC

TGTGGCTCCCAACTTTCTGTTGTGTATCTGTATTATGGAACAATTATTGGACTGTATTTT

TTCCCCTCATCCAGCAACTCCAATGACAATGACATAATTGCTTCTGTAATGTATACAGTG

GTCACCCCCTTGCTAAACCCTTTTATTTATAGCCTAAGAAACAGGGACATGAAGGGGGCC

CTGCAGAGACTCTTCAACTGGATGAAAGTATCTTCTTAG

>LoafORs6.33

ATGAGCACCATGAGGTGGGAGAACCAAAGCAGCATGTCTGAATTCCTCCTCCTGGGCCTC

CCCATCCAGCTGGAGCAGCAGAACATGTTCTTCACCCTTTTCCTGGTGATGTACCTCACC

ACCATGCTGGGGAACATGCTCATCATCCTGCTCATCAGGGTGGACCCTTGCCTTCACACC

CCCATGTACTTCTTCCTCAGCCACTTGGCCTTCACTGACTTCTCTCTTTCATCTGTCACT

GTCCCAAAGATGCTGATGAACATGCATTCTGAGGATCTATTCATCTCCTACGCAGGGTGT

ATAACACAGATGTATTTTTTCATTTTTTTTATAGACCTGGACAATTTCCTCCTCACCACA

ATGGCATATGATCGGTATGTAGCCATCTGTCACCCCCTCCACTATACCACCATCATGAGG

GAGGGGCTGTGTACCCTACTAGTAGCTGTGTCTTGGATCCTTTCCTGTGCCAGTGCCCTG

TCTCACACCATCCCCCTGGCCCATTTGTCCTTCTGTGATGACAACACTATCCCCCATTTC

TTCTGTGACCTAGCTGCCCTACTAAAGCTGTCCTGCTCGGACATCTTCCTCAATGAGATG

ATCATTTTCACGGTGGGAGTGGCAGTCATTACTCTTCCATTAATATGCATCCTCATCTCT

TATGGCCACATAGGGACCACCATCCTGAAGGTTCCATCTACCAAGGGGATCTGCAAAGCC

TTGTCCACTTGTGGCTCCCACCTTACTGTTGTGTCTCTGTATTATGGAACAATTATTGGA

CTGTATTTGTTCCCCTCATCCAACAACTCCAATGTCAATAACATAATTGCTTCTGTAATG

TATATAGTGGTCACCCCCTTGTTAAACCCTTTCATTTATAGCCTAAGGAACAGGGACATG

AAGGGGGCCCTGCAGAGACTCTTCAACAGGGTAATAGTCTCTTCTTAG

>LoafORs6.34

ATGAGGAGGGAGAATCAGAGCAGCGTGTCTGAATTCCTCCTCCTGGGCTTCCCCTTCTGG

CGGGAGCAGCAGGGCATGTTCTTTGCCCTGTTCCTGGTCATATACCTCACCACCGTGCTG

GGGAACCTGCTCATCATCGTGCTTATCAGAGGGGACTCTCGCCTGCACACGCCCATGTAC

TTCTTCCTCAGCCACTTGGCCCTCACTGATACCACTTTTTCATCTGTAACTGTCCCAAAG

ATGCTGATGAACATGCAGACCCAGCACCTATCCATCTCTTATGAAGGGTGCATTTCACAG

ACATATTTTTTCATACTCCTTGCTGATTTGGACAGTTTCCTTATCACTTCAATGGCCTAT

GACAGATATGTGGCTATCTGTCACCCTCTCCACTATATCACCATCATGAGTCAAAGCCTT

TGTGTGATGCTGGTGGCTGGGTCCTGGGTCACTGCTTGTGCTTGTGCTCTTTTGCATACC

CTTCTCCTTGCCTGGCTGTCTTTCTGTGCTGATGACACCATCCCCCACTTCTTCTGTGAC

CTCGCTGCTCTGCTTAAATTGTCCTGCTCAGACACCTCTATCAACCAATTGGTAATCTTT

ACTGCAGGACTGACAGCCATTATTCTTCCATTCTTATGTACCCTGGTTTCTTATGGCCAT

ATTGGAGTCACCATCCTTCAGGTTCCTTCTACCAATGGTATCTGCAAAGCCTTGTCTACT

TGTGGATCCCATCTCTCAGTGGTGACTCTCTATTATGGGGCAATTTTTGGTCTATATTTT

CTTCCCTCATCTGGCAACACCATAGACAAGAACATAATTGGTTCTATGTTGTACACAGTG

ATCACCCCCATGTTGAACCCATTCATTTATAGCCTGAGAAATAAAGAAATGAAAGGAGCC

TTGAGAAAACTCTTTAGTAAGAAAATATATTCTTCCAACTGA

>LoafORs6.35

ATGAGGGAGGATAATCAGAGCAGTGTGTCCGAATTCCTCCTCCTAGGGCTCCCCATCCAG

CTGGAGCAGCAGGGCACATTCTTTGCCTTGTTCCTGGGCATATACCTCACCACAGTGCTG

GGAAACCTGCTCATCATACTGCTTATCAGACTAGACTCTCACCTCCACACCCCCATGTAC

TTCTTTCTCAGCCACTTGGCTTTCACTGATGTCTCTTTCTCATCAGTCATAGCCCCAAAG

ATGCTGATGAACATGCAGACACAAAGTCAATCTATCTCATACATGGGGTGCATTTCCCAG

GTCTATTTTTTCTTATTCTTTGGAGATATTGACAGCTTACTTCTTACCTCCATGGCCTAT

GACAGGTACGTGGCCATTTGTCACCCCCTTCGCTATACCACCATCATGAGTCAGAGCCTG

TGTTTCATGCTAGTAATTTTGTCGTGGGCCCACTCCTTTGCCTATGCATTATTGCACACC

CTGCTCCTGGCCCATCTCTCTTTCTGTGGAGACAATACTCTCCCTCACTTCTTCTGTGAC

CTCTCTGCCTTACTTAAGCTGTCCACCTCAGACACGTCAACTAATGAGCTGGTTATCCTC

ACTCTGGGGGTTGTGGTCATTACCAGCCCACTCATATGCATCCTGGTCTCTTATGGCCGC

ATTGTGTCCACCATCCTGAGAGTCCACTTAACCAAGGGGATCGGCAAAGCCTTGTCCACT

TGTGGCTCCCACCTCTCTGTCGTGTCTCTGTATTATGGGGCAATTATTGGACTCTACTTT

TTCCCCTCATCCAGTGACTCCAATGACAAGAATGTCATTGTGGCTGTATTGTACACTCTG

GTCACTCCCATGCTAAATCCCTTTATCTACAGTCTGAGAAGTCGGGACATGAGAGGAGCT

CTGGGAAATATACTCAGTAGAAGAACGTTTTTGTCACAATAG

>LoafORs6.36

ATGAAGAGAGATAATCAGAGCAGAGTGTCTGAATTCCTCCTCTTAGGGCTCCCCATACAG

CCAGAACAGCAGGGAATGTTCTTTGCCCTGTTCCTCGGCATGTACCTCACCACGGTGCTG

GGGAACCTGCTCATCATCCTGCTCATCAGGCTGGACTCTCGCCTCCACACCCCCATGTAC

TTCTTCCTCAGCCACTTAGCCATCACTGACATCTTTTTCTCATCAGTCACAGCCCCAAAG

GTGCTGATGAACATGCAAACACAGAGTCAATCCATCTCATACGCTGGGTGCATTTCTCAG

GTCTATTTTTCCATACTCTTTGCTGATATTGACAGCTTCCTTCTCACCTCAATGGCCTAT

GACAGGTACGTGGCCATTTGTCACTCCCTCCACTATACCACCATCATGAGTCAAAGCCTG

TGTTTCTTGCTAGTAATTGTGTCCTGGGTTTTATCCTTTGCCAGTGCTCTGTTACACACC

CTGCTCCTGGCCCATCTTTCCTTCTGTGGAGACAACATTCTCCCCCACTTCTTCTGTGAC

ATCTCTGCCTTACTTAAGCTGTCCAGCTCAGACACCACAACAAATGAGCTGGTTATTCTT

ACTGTAGGGGGGATGGTCATTATCCTTCCATTCATATGCATCCTGGTCTCTTATGGCCAC

ATTGGGTCCACCATCCTGAGAATTCCCTCCACCAAGGGAATCTGCAAAGCCTTGTCCACT

TGTGGCTCCCACCTCTCTGTCGTGTCTCTGTACTATGGGGCAATTATTGGATTGTACATT

TTCCCCTCATCCAGTGACTCCAATGGCAAGGATGTCATTGTGGCTGTATTGTACACTCTG

GTCACTCCCATGCTTAATCCTTTTATCTACAGTCTGAGAAATAGGGACATGAAAGGAGCT

ATGGGAAATATACTCAGTAGAGGAAAGTTTTCACTATAA

>LoafORs6.37

ATGAAGAGGGATAATCAGAGCAGTGTGTCTGAATTCCTCCTCCTAGGACTCCCCATCAGG

CCGGAGCAGCAGGGCATGTTCTTCGTCCTGTTCCTGGTCATGTACCTCACCACCATGTTG

GGGAACCTATTCATTGTTCTGCTTATCAGACTGGACTCTTGCCTCCACACCCCCATGTAC

TTCTTCCTCAGCCACTTGGCCCTCACTGACATCTCTTTCTCATCAGTCACAGCACCAAAG

ATGTTGTTGAACATGCAGACACAAAGTCAATCTATCTCATATGCTGGGTGCATTTCTCAG

GTCTATTTTTCCATCTTCTTTTTTGATATCGACAGCTTCCTTCTCACTTCAATGGCCTAT

GACAGGTATGTGGCTATTTGTCACCCCCTCCACTATACCACCATCATGAGTCGGAGCCTG

TGTTTCATGCTAGTATTTGTGTCCTGGGTCTTATCCTTTGCCAGTGCTCTATTGCACACC

TTGCTCCTGGCCCGTTTGTACTTCTGTGGAGACAATATTCTCCTCCACTTCTTCTGTGAC

CTCTCTACCTTACTTAAGCTTTCCAGCTCGGACACCACAACAAATGAGCTGGTTATTCTT

ACTGTAGGGACAGTGTTCATTACCCTTCCATTCATATGCATCCTGGTCTCTTATGGCCAC

ATTGGGTCCACAATCCTGAGAGTTCCCTCCACCAAGGGGATCTGCAAAGCCTTGTCCACT

TGTGGCTCCCACCTCTCTGTTGTGTCTCTGTACTATGGGGCAATTATTGGATTGTACATT

TTCCCCTCATCCAGTGATTCCAACGGCAAGGATGTCATTGTGGCTGTATTTTACACTTTG

GTCACTCCCATGCTAAATCCTGTTATCTACAGCCTGAGAAATCAGGCCATGAAAGGAGCT

CTAGGAAAGATACTCAGTAGAGAAAAGTTTTCACCATAA

>LoafORs6.38P

ATGAGGAGGGATAATCAGAGCAATGTGTCTGAATTTCTCCTCCTAGGGCTCCCCATCTGG

CCGGAGCATCAGGGCGTATACTACGCCCTGTTCCTGGGCATGTACCTCATCACAGTGCTG

GGGAACCTACTCATCATCCTGCTCATCAGGCTGGACTCTCGCCTCCACACCTCTATGTAC

TTCTTCCTCAGCCACTTGGCTTTCACTGATGTCTCTTTCTCATCAGTCACAGCACCAAAG

ATGCTGATGAACATGCAAACACAGAGACAATCCATCTCATACGCTGGGTGCATTTCTTAG

GTGTATTTTTTCTTATTTTTTGGTGATATTGACAGCTTCCTTCTCACCTCAATGGCCTAT

GACAGGTACGTGGCCATTTGTCACCCCCTCCACTATACCACTATCATGAGTCAAAGCCTA

TGTTTCCTGCTAGTAATTGTATCCTGGGTCTTATCCTTTGCCAGTGCTCTATTGCACACA

CTGCTCCTAGTCCATCTCTCTTTCTGTGGAGACAACATTGTCCCCCACTTCTTCTGTGAC

CTCTCTGCCTTACTTAAGCTGTCCAGCTCAGACACCTCAACTAATGAGTTGGTTATCCTC

ACTGTTGGTGTCCTGGTGATTACTCTTCCATTCTTATGCATCCTGGTCTCTTATGGTCAC

ATTGGAGCCACTATCCTGAGAGTCCCCTCAACCAAGGGAGTCTGCAAAGCCTTGTCCACC

TGTGGCTCCCACCTCTCTGTGGTGTCTCTATATTATGGGGCTATTATTGGATTGTACTTT

TTCCCC

>LoafORs6.39

ATGAAGAGGGATAATCAGAGCAGTCTGTCAGAATTCCTCCTTCTGGGGCTCCCCATCTGT

CCAGAGCAGCAGGGCATATACTATGCTCTGTTCCTGGGCATCTACCTCACCACCGTTCTG

GAGAACCTGTTCATCATCCTGCTCATCAGGCTGGACTCTCGCCTCCACACCCCCATGTAC

TTCTTCCTCAGCCACTTGGCCCTCACTGACATCTCTTTCTCATCAGTCACAGCACCAAAG

ATGCTGATGAACATGCAAATGCAGAATCAATCCATCTCATATGCTGGGTGCATTTCTCAG

GTGTATTTTTTCTTATTTTTTGGTGGTATTGACAGCTTCCTTCTCACCTCAATGGCCTAT

GACAGGTACGTGGCCATTTGTTACCCCCTCCACTATACCACTATCATGAGTCGGAGCCTG

TGTTTCCTGCTAGTAATTATGTCCTGGGTCTTATCCTTTGCCAGTGCACTATTGCACACA

CTGCTGTTGGCTTGTCTCTCTTTCTGTGGAGACAACACTATTCCCCACTTCTTCTGTGAC

CTCTCTGCCTTACTTAAACTGTCCAGCTCAGACACCTCAACAAATAAGCTGGCAATCCTC

ATTGTGGGGGTCATGGTCATTACCCTTCCATTCATATGCATCCTGGTCTCTTATGGCTGC

ATTGGGTCCACTATCCTGAGAGTTCCCTCAACCAAGGGAATCTGCAAAGCCTTGTCCACC

TGTGGCTCCCACCTCTCCGTGGTGTCTCTATACTATGGGGCTATTATTGGGTTGTACTTT

TTCCCCTCATTCAGGAACTCTAATGACAAAGATGTCATTGTGGCTATATTATACACTGTG

GTCACTCCCATGCTAAATCCTTTTATCTATAGTCTGAGGAATCGGGACATGAAAGGAGCT

TTGGGAAATATACTCAAAAGAAGAACATTTTCACCATACTGTGCACTGAATTTAGATAGG

TGTTGTGACTTGTTTTGTTTAATAAGATGCTAG

>LoafORs6.40

ATGAGGAGGGATAATCAGAGTAGCCTGTCAGAATTCCTCCTCCTAGGGCTTCCCATCAGG

CCAGACCAACAGGACATATACTATGCCCTGTTCCTGGGCATGTACCTCACCACAGTGCTA

GGAAACCTGCTCATCATCCTGCTCATCAGGCTGGACTCGTGCCTCCAAACTCCCAAGTAC

TTCTTCCTCAGCCATTTGGCTTTCAATGACATCTCTTTCTCATCAGTCACAGCACCAAAG

ATGCTGATGAACATGCAAATGCAGAATCAATCCATCTCATATGCTGGGTGCATTTCTCAG

GTATATTTTTTCTTATTTTTTGCTGCTATTGACAGTTTCCTTCTTACTTCAATGGCCTAT

GACAGGTACGTGGCTATTTGTCACCCCCTCCACTATACCACCATCATGAATCGCAGCCTG

TGTTTCCTGCTAGTAATTTTGTCCTGGGTCTTATCCTTTGCCAGTGCTCTATTGCACACA

CTGTTGCTGGCTCGTCTTTCTTTCTGTGGAGGCAACACTCTTCCCCACTTCTTCTGTGAC

CTCTCTGCCTTACTTAAGCTGTCCAGCTCAGACACGTCAACTAATGAGCAGGTTATCCTC

GCTGTGGGAGTGGTGGTCATTAACCTTCCATTCATATGTATCCTGATCTCTTATGGTTGC

ATTGGGTCCACTATCTTGAGAGTGCCCTCAACCATGGGAATCAGCAAAGCCTTGTCCACC

TGTGGCTCCCACCTCTCTGTGGTTTCTCTATACTATGGAGCTATTATTGGATTGTACTTT

TTCCCCTCATCCAGTAACTCCAATGACAAGGATATCATTGTGGCTGTATTATATTCTCTG

GTTACTCCCATGCTAAATCCTTTTATCTATAGTCTGAGAAATAGGGACATGAGAGGAGCT

CTGGGAAATGTACTCAATAGAAGAACATTTTCACCATAG

>LoafORs6.41

ATGAGGAGGGATAATCAGAGTAGCCTGTCAGAATTCCTCCTCCTAGGGCTCCCCATTAGG

CCGGAACAGCAGGAAATGTTCTTCTCCGTGTTCCTGGGCATGTATCTCACCACAGTGCTG

GGGAACCTACTCATCATCCTGCTCATCAGGCTGGACTCTCGCCTCCACACCCCCATGTAC

TTCTTCCTCAGCCACTTGGCCCTCACTGACATCTCTTCCTCATCAGTCATAGCACCAAAG

ATGCTGATGAACATGAAAACACGGAGTCAATCCATGTCATATACTGGGTGCATTTCTCAG

GTGTACTTTTACATATTCTTTTTTGATATTGACAGCTTCCTTCTCACCTCAATGGCCTAT

GACAGGTACGTGGCCATTTGTCACCCCCTCCACTATACCGCCATCATGAGTCAGAGCCTG

TGTTTCTTGCTAGTTACTGTGTCCTGGGTCTTATCCTTTGCCAACGCCCTATTGCACACC

CTGCTTCTAGCCCATCTGTCCTTCTGTGGAGACAACACCCTTCCTCACTTCTTCTGTGAC

CTCCCTACCTTACTTAACCTATCCAGCTCGGACACATCAACCAATGAATTGGTAATTCTT

ACTGTAGGGGGGGTGGTCATTATCCTTCCATTCGTATGCATCCTGGTCTCTTATGGTCAC

ATTGGTGCCACCATCCTAAAAGTCCCCTCAACCAAGGGAATCTGCAAAGCCTTGTCCACT

TGTGGCTCTCACCTCTCTGTAGTGTCTCTGTACTATGGGGCAATTATTGGGTTGTATGCT

TCCCCCTCATCCAGTGACTCTAATAGCAAGGATGTCATTGTGGCTATATTTTACACTCTG

GGCACTCCCATGCTAAATCCCTTTATCTACAGTCTGAGAAATCGGGACATGAAAGGAGCT

CTGGGAAACATACTCAGTAAAGGAAAGTTTTCACCATAA

>LoafORs6.42P

ATGAGGAGGGATAATCAGAGCAGTGCCTCAGAATTCCTCCTCCTAGGGCTCCCCATCAGG

CTGGAGCAGTAGGGCATATACTATGCTCTGTCCCTGGGCATGTACCTCACGAAGGTGCTA

GGGAACCTGCTCATCATCCTCCTCATCAGGGTGGACTCATGCCTCCAAACTCCCATGTAC

TTCTTCCTCAGTCACCTGGTTTTCACTGACATCTGGTTCTCATAGGTCATAGCACCAAAG

ATGCTGATGAACATGCAAACACAGAGTCAATCTATCTCATATGCTGGTGCATTTCTCAGG

TGTATTTTTTTCTTATTTTTTGCTGCTATTGGCAGTTTCCTTCTTACTTCAATG

>LoafORs6.43P

GGCATGTACCTCACCATGGTGCTGGGGAACCTGCTCATCATCCTGCTCATCAGGCTAGAC

TCTCGCCTCCACAGCCCCATGTACTTCTTCCTCAGCCACTTGGCCCTCTCTAATATCTCT

TTCTCATCAGTCACAGCACCAAAGATGCTAATGAACACACAAACACAGAATCAATCCATC

TCATATGCTGGGTGCATTTTTCAGGGGTGCTTTTTCATTTTCTTTGCTGATATTGATAGT

TTCCTTCTTACCGCAATGGCCTATGACAGGTACCTGTCTATTTGTCACCCCTTCCACTAT

ACCACCATCATGAGTCAGAGC/CTAGTAATTGTGTCCTGAGTCTTATCCTTTACCACTGT

GCTATCGCGTAACCTGCTCCTTGCTTGTTTCTCTTTCTGTAGAGACAATACCTTCCCCCA

CTTTCGTGACCTCTCTGCCTTACTTAAGCTGTCCAGCTCAAACACCTCAACCAATGAGCT

GATTATCCTCACCGAGAGGGTGATGATTATTATGCTTCCACTCATATGCATCCTACTCTC

TTGTGGCCACATTGGCACCACCATCCTGAGAGTCCCATCAACCAAGGAAATCTTCAAAGC

CTGGTCCACCTGTGGCTCCCACCTCTCAGTAGTGTCTGTATAGCAAGGGACAATTATTGG

ATTGTACTTTTTGCCCTCATCCAGTAACTCCAATAACAAGGATGTCATTGTGGCTGTATT

ATACACTCTGGTTACTCCCATGCTAAATACCTTCATCTATAGTCTGAGGAGTCAGGACAT

GAAAGGAGCTCTGGGAAATATACTCAATAGAAGGACATTTTCACCATAGAGTGCACTGAA

TTTAGGCAGGAGTTTTGACTGGTTTTGT

>LoafORs6.44P

ATGAAGAGAGATAATCAGAGCAGTGTGCCTGAATTCCTCCTCCTAGGACTTCCCATCTGG

CTGGAGCAGTAGGACATGTTCTTCTCCCTGTTCCTGGGCATGTACCTCACCACAGTGCTG

GGGAACCTGCTCATCATCCTGCTAATCAAGCTGGACTCTAGCCTCCACACCCCCATGTAC

TTCTTCCTCAGCCACTTGGCCCTCGCTGACATCTCTTTCTCATCAGTCACAGCCCCAAAG

ATGCTGATGAACATGCAAACACAGAATCAATCCATCTCATATACTGGGTGCATTTCTCAG

GTGTATTTTTTCATATTCTTTGCTGATATTGATAGTTTCCTTCTCACCTCAATGGCCTAT

GATAGGTACATGGCCGTTTGTCACCCCCTCCACTATACCGCCATCATGAGTCAGAGCCTG

TGTTTCTTGCTAGTAATTGTGTCCTGTGTCTTATCTTTTGCCAATGCCCTAGTGCACACC

CTACTCCTGGTCCATCTGTCCTTCTGTGGAGACAACAGTCTTCCCCACTTCTTCTGTGAC

CTCTCTACCTTACTTAAACTGTCCAGCTCAGACACCTCAACCAATGAATTGGTTATTCTG

GCTGTAGGGGGG/GGGGGGGTGGTCATTATCCTTCCATTCATATGCATCCTCGTCTCTTA

CAGCTACATTGGTGCCACCATCCTGCAGGTCCCCTTGACCAAGGGAATCTGCAAAGCCTT

GTCCACTTGTGGCTTTCACTTCTCTGTAGTGTCTCTGTACTATGGGGCAATTATTGGATT

GTATGTTTCCCCCTCATCTAGTGACTCCAATAGTAAGGATGTCATTGTGGCTGTATTTTA

CACTCTGGTCACTCCCATGCTAAATCCCTTTATCTACAGTCTGAGAAACCGGGACATGAA

AGGAACTCTGGGAAATATACTCAGTAAA

>LoafORs6.45P

ACTTTCCCCCACTTCTACTGTGACCTCTCTGTCTTACTTAAGCTGTCCAGCTCAGATACC

TCAACCAATGAGCTATTTACCCTTGCATTCATATGCATCCTAGTCTCTTATGGCTGCAGT

GAGAGTCCCCTCAAATAAGAGAATCTTCAAAGCCTTGTCCACGTATGCCTTCCAACTCTA

CGTGGTGTCTCTATACTATGGGGCAATTAATGGATTGTAGTTTTTCCCCTTATCCAGTAA

CTTCAATGACAAAGACTCATAGTGAGTGTACTATACACTCTGGTTACTTCCATTCTAAAT

CCTTTCATCTATAGTCTGAGGAATCAGGACATGAAAGGAACTCTGGGAAATATACTCAAT

AGAAGAACATTTTCACCATAGCGTGCACTGAATTAAGGTACGTTTTGAGACTTGTTTTGT

>LoafORs6.46

ATGAGGAGGGATAATCAGAGCAGCCTGTCGGAATTCCTCCTTCTAGGGCTTCCCATCAGG

CCGGAACAGCAGGACATGTTCTTTGCCCTGTTCCTGGGCATGTACCTCACCACAGTGCTG

GGGAACCTACTCATCATCCTGCTCATCAGGCTGGACTCTCGCCTCCACACCCCCATGTAC

TTCTTCCTCAGCCACTTGGCCCTCACTGACATCTCTTTCTCATCAGTGATAGCACCAAAG

ATGCTGATGAACATGCAAACGCAGAATCAATCCATTTCATATGCTGGGTGCATTTCTCAG

GTGTACTTTTACATATTCTTTGCTGATATTGATAGTTTCCTTCTCACCTCAATGGCCTAT

GATAGGTACATGGCTGTTTGTCACCCCCTCCACTATACCACCATCATGAGTCAGAGCCTG

TGTTTCTGGCTAGTTATTGTGTCCTGGGTGTTGTCCTTTGGCAATGCCCTATTGCACACC

CTGCTCCTGGCCCATCTGTCCTTCTGTGGAGACAACACTCTTCCTCACTTCTTCTGTGAC

CTCCCTACCTTACTTAAGCTATCCAGCTCAGATACCTCAACCAATGAGCTATTTATTCTT

ACTGTAGGGGTGGTGGTCATTACCCTTCCGTTCATATGCATCCTGGTCTCTTATGGTCAC

ATTGGTGCCACCATCCTGAGAGTCACCTCTACCAAGGGGATCTGCAAAGCCTTGTCCACT

TGTGGCTCTCACCTCTCTGTAGTGTCTCTGTACTATGGAGCAATTATTGGATTGTGTGTT

TCCCCCTCATCCAGTGACTCTAATAGCAAGGATGTCATTGTGGGTGTATTTTACACCCTG

GGCACTCCCATGCTAAATCCCTTTATCTACAGTCTGAGAAATCAGGACATGAAAAGAGCT

CTGGGAAATATACTCAGTAAAGGAAAGTTTTCACCATAA

>LoafORs6.47P

TCTGAGTTCTTTCTCCTGGGGATCCCCATCAGGCTGGAGGGGCTGGGCATGCATCTCACC

ACAGTGCTGGGGAACCTGTTCATCATCCTGCTCATAAGGCTGGATTCTCGCCTCCACACC

CCCATGTACTTCTTCCTCACCACGGGACCTTCTCTGACATCTCTTTCTCAGCACCAAAGA

TGCTAATGAACTCACAAACACAGAGTGAATCCATCTCATATACTGGGTGCATTTTTCAGG

TGTACTTTTTTTGGTGATATTGATAGTTTCCTTCTTACCTCAATGGCCTATGACAGGTAC

ATGGCAGTTTGTCACCCCTTCCACTATACCACCATCATGAGTCAGAGCCTGTGTTGCCTA

CTAGTAATTGTGTCCTGAATCTTATCCTTTACAACTGTGCTATTGCACACCTTGCTTCTT

GCTCATCTCTCTTTCTGTAGAGACAACACCGTTCCCCACTTCTGTGACCTCTCTGCCTTA

CTTAAGCTGTCCAGCTCAGACACCTCAACCAATGAGCCAATTATCCTCACTGAGAGGGTG

GTGATTCTTATGCTTCCATTCATATGCATCCTGCTCTCTTATGCCACATTG/ATTGCCAC

CACCAACCTGAAAGTCCCATCAACGAAGGGAATCTTCAAAGCCTTGTCCACCTGTGGCTC

CCACCTCTAGGTAGCGTCTGTATACTAAGGGAGAATTATTGGATTGTACTTTTTGCCCTC

ATCCAGTAACTCCAATGACAAGGATGCCATTGTGGCTGTATTATACACTCTGGTTACTCC

CATGCTAAATCCCTTCTTCTATAGTCTGAGGAATCAGGACATGAAAGGAGCTCTGGGAAA

TATACTCAATAGAAGGACATTTTCACCATAGAGTGCACTGAATTTAGGCGGGTGTTTTGA

TTGGATTTGT

>LoafORs6.48

ATGAGGAGGGATAATCAGAGCAGTATGTCTGAATTTCTCCTCCTAGGACTTCCCCTCTGG

ATGGAGCAGCACGACATGTTCTTCCCCCTGTTCCTGGGCATGTACCTCACCACAGTGCTG

GGGAACCTGCTCATCATCCTGCTTATCAAGCTGGACTCTAGCCTCCACACCCCCATGTAC

TTCTTCCTCAGCCACTTGGCCTTCACTGACATCTCTTTCTCATCAGTCACAGCCCCAAAG

ATGCTGATGAACATGCAAACACAGAATCAATCCATCTCTTATGCTGGATGCATTTCTCAG

GTGTATTTTTTCATATTCTTTGCTGATATTGATAGTTTCCTTCTCACCTCAATGGCCTAC

GATAGGTACATGGCCATTTGTCACCCCCTTCACTATTCCATCATCATGAGGCAAAGCCTG

TGTTTCCTGCTAGTAATTGTATCCTGGGTCTTATCCTTCGCCAATGCCCTAGTGCACACC

CTACTCCTGGCCCATCTGTCCTTCTGTGGAGACAACACTCTTCCTCACTTCTTCTGTGAC

CTATCTACCTTGCTGAAGCTGTCCAGCTCAGACACCTCAACCAATGAGTTGGTTATTCTG

ACTGTAGGGGGAGTAGTCATTACCCTTCCGTTCATATGCATCCTGGTCTCTTATGGTCAC

ATTGGTGCCACCATCTTGAGGGTCCCCTCGACCAAGGGGATCTGCAAAGCCTTGTCCACT

TGTGGCTCTCACCTCTCTGTAGTGTCTCTGTACTATGGGGCAATTATTGGATTGTATGTT

TCCCCCTCATCCAGTGACTCCAATAGCAAGGATGTCATTGTGGCTGTATTTTACACTCTG

GTCACTCCCATGCTAAACCCTTTTATCTACAGTCTGAGAAACCGGGACATGAAAGGGGCT

CTGGGAAATATACTCAGTAAAGTTTTCACCATAATGTACTCTGTAGACTAG

>LoafORs6.49P

ACTTTCTCCCACTTCTTCCGTGACCTCTCTGTCTTACTTAAGCTGTCCAGCTCGGATACC

TCAACCAATGAGCTATTTACCCTTGCATTCATATGCATCCTAGTCTCTTATGGCTGCAGT

GTGTCCACTATCCTGAGAGTCCCCTCAAATAAGGGAATCTTCAAAGCCTTGTCCACCTAT

GGCTTCCAACTCTATGTGGTGTCTCTATACTTTGGGGCAATTAATGGATTGTAGTTTTTC

CCCTTATCCAGTAACTTCAATGACAAAGATGTCATAGTGAGTGTACTATACACTCTGGTT

ACTTCCATTCTAAATCCTTTTATCTATAGTCTGAGGAATCAGGACATGAAAGGAACTCTG

GGAAATATACTCAATAGAAGAACATTTTCACCATAGTGTGCACTGAATTAAGGTACGTTT

TGAGACTTGTTTTGT

>LoafORs6.50

ATGAGGAGGGATAATCAGAGCAGCCTGTCAGAATTCCTCCTTCTAGGTCTCCCCATCAGG

CCAGAACAGCAGGACATGTTCTTTGCCCTGTTCCTGGGCATGTACCTCACCACAGTGCTG

GGGAACCTGCTCATCATCCTGCTCATCAGGCTGGACTCTCACCTCCACACCCCCATGTAC

TTCTTCCTCAGCCACTTGGCCTTCACTGACATCTCTTTCTCATCAGTGATAGCGCCAAAG

ATGCTGATGAACATGCGAACACAGAGTCGATCCATCTCATATGCTGGGTGCATTTCTCAG

GTGTACTTTTACATATTCTTTGCTGATACTGATAGCTTCCTTCTCACCTCAATGGCCTAT

GATAGGTACATGGCTATTTGTCACCCCCTCCACTATACCACCATCATGAGTCAGAGCCTG

TGTTTCTTGCTAGTTATTGTGTCCTGTGTCTTATCCTTTGCCAATGCCCTATTGCACACT

CTGCTCCTGGCCCATCTGTCCTTCTGTGGAGACAACACTCTTCCTCACTTCTTCTGTGAC

CTCCCTACTGTCCTTAAGCTATCCAGCTCAGACACCTCAACCAATGAGCTGTTTATTCTT

ACTGTAGGGGGAGTAGTCATTACCCTTCCGTTCATATGCATCCTGGTCTCTTATGGTCAC

ATTGGTGCCACCATCCTGAGAGTCGCCTCGACCAAGGGGATCTGCAAAGCCTTGTCCACT

TGTGGCTCTCACCTCTCTGTAGTGTCTCTGTACTATGGGGCAATTATTGGATTGTATGTT

TCCCCCTCATCCAGTGACTCCAATAGCAAGGATGTCATTGTGGCTGTATTTTACACTCTG

GGCACTCCCATGCTAAACCCCTTTATCTACAGTCTGAGAAATCAGGACATGAAAAGAGCT

CTGGGAAATATACTCAGTAAAGGAAAGTTTTCACCATAA

>LoafORs6.51P

TCTGAGTTCTTTTTCCTGGGGATCCCCATCAGGCTGGAGGGGCTGGGCATGTGTCTCACC

ACAGCGCTGGGGAACCTGTTCATCATCCTGCTTATCAGGCTGGATTCTCGCCTCCAAACC

CCCATGTACTTCTTCCTCACCACGGGACCTTCTCTGACATCTCTTTCTCAGCACCAAAGA

TGCTAATGAACTCACAAACACAGAGTGAATCCATCTCATATGCTGGGTGCATTTTTCAGG

TGTACCTTTTTTGGTGATATTGATAGTTTCCTTCTTACCTCAATGGCCTATGGCAGGTAC

ATGGCAATTTGTCACACCTTCCACTTTTTTTCCCACTATACCACCATCATGAGTCAGAGC

CTGTGTTGCCTACTAGTAATTGTGTCCTGAATCTTATCCTTTACAACTGTGCTATTGCAC

ACCTTGCTTCTTGCTCATCTCTCTTTCTGTAGAGACAACACCGTCCCCCACTTCTGTGAC

CTCTCTGCCTTACTTAAGCTGTCCAGCTCAGACACCTCAACCAATGAGCCAATTATCCTC

ACTGAGAGGGTGGTGATTCTTATGCTTCTATTCATATGCATCCTGCTCTCTTATGCCACA

TTG/ATTGCCACCACCAACCTGAAAGTCCCATCAACGAAGGGAATCTTCAAAGCCTTGTC

CACCTGTGGCTCCCACCTCTAGGTAGCGTCTGTATACTAAGGGAGAATTATTGGATTGTA

CTTTTTGCCCTCATCCAGTAACTCCAATGACAAGGATGCCATTGTGGCTGTATTATACAC

TCTGGTTACTCCCATGCTAAATCCCTTCTTCTATAGTCTGAGGAATCAGGACATGAAAGG

AGCTCTGGGAAATATACTCAATAGAAGGACATTTTCACCATAGAGTGCACTGAATTTAGG

CAGGTGTTTTGACTGGTTTTGT

>LoafORs6.52P

ATGAGGAGGGATAATCAGAGTAGTGTCTCTGAATTCCTCCTCCTAGGACTTCCCATCTGG

CTGGAGAAGCAGGACATGTTCTTCCCCCTGTTCCTGGGCATGTACCTCACCACAGTGTTG

GGGAACCTGCTCATCATCCTGCTCATCAAGCTGGGCTCTCACCTCCATACCTGCATGTAC

TTCTTCCTCAGCCACTTGGCCCTCACTGACATCTCTTTCTCATCAGTCACAGCCCCAAAG

ATGCTGATGAACATGCAAACACAGAGTCAATCCATCTCATATGCTGGGTGCATTTCTCAG

GTGTATTTTTTCATATTCTTTGCTGATATTGATAATTTCCTTCTCACCTCAATGGCCTAC

GATAGGTACATGGCCATTTGTCACCTCCTTCACTAGACCATCATCATGAGTCAGAACCTG

/TGTTTCTTGCTAGTAAGTCTGTTCTGGGTCTTATCCTTTGCCAATGCCCTACTCCTGGC

CCATCTGTCCTTCTGTGGACACAACACTCTTCCCCACTTCTTTTGTGACCTCTCTACCTT

ACTTAAGCTGTTCAGCTCAGACACCTCAACCAATGAGTTGGTTATTCTGACTATAGGGGG

GGTGGTCATTATCATTCCATTCGTATGCATCCTGGTCTCTTAAAGCTACATTGGTGCCAC

CATCCTGAGGGTGCCCTTGACCAAGGGAATCTGCAAAGCCTTGTCCACTTGTGGCTTTCA

CCTCTCTGTAGTGTCTCTGTACTATGGGGCAATTGTTAGATTGTATGTTTCCCCCTCATC

CAGTGACTCCAATAGCAAGGATATCATTGTGGCTGTATTTTACACTCTGGTCACTCCCAT

GCTAAATCCCTTTATCTACAGTCTGAGAAACTGGGACATGAAAGGAGCTCTGGGAAATAT

ATTCAGTAGA

>LoafORs6.53

ATGAGGTGGGAGAACCAGAGCAGTGTGTCTAAATTCCTCCTTCTGGGGCTCCCCATCCAG

CTGGATCAGCAGGCCATGTTCTTTGCCCTGTTCCTGAGCATGTACCTCACCACGATACTA

GGGAACCTGCTCATTATCCTGCTCATCAGACTGGACTCTCGCCTCCACACCCCCATGTAC

TTCTTCCTCAGCCACTTGGCCCTCACTGACATCTCCTTTTCATCTGTCACTGTCCCGAAG

ATGCTTATGAATATGCAGACTCAACACCTATTCATCTCCTATCCAGACTGTATTTCACAG

ATGTATTTTTATATGCTTTTTGGTGGTGTTGATAATTTCCTTCTTGGAGAGATGGCATAT

GACAGGTATGCGGCCATCTGTCATCCTCTACATTACACCTCCATCATGAAGAAAGAGTTC

TGTGTCTTGTTGATAGCTGGCTCCTGGATACTCTCTTGCGGCAGTGCCCTCTTGCACACG

CTTCTCCTGGCCCAGCTGTCCTTCTGTGCTGACAACACCATCCCACACTTTTTCTGTAGT

CTCTCCATCCTACTCAAGCTTTCCTGCTCAAACACTTCTCTCAATGAGCTGGTCATATTG

ACCGCAGGGGCTGGGGTTATCATCCTCCCATTGAGTGGCATCCTGCTTTCTTATGGCCGC

ATTGTGGCCTCTATCTTGAGGGTCCCTTCTACCAAAGGTATCTGCAAAGCTTTGTCCACC

TGTGGCTCCCACCTCTCTGTAGTGTCTCTATTTTATGGAACAATCGTGGCACTGTACTTT

TCCCCCTCATCTAACAACTCCAATGAGAAAGACATGATTTTCTCACTAATGTATACAGTA

GTGACCCCCATGTTGAATCCCTTCATCTATAGCCTAAGGAACAGAGACATGAAATTGGCT

CTGGGGATACTTTTCAGAAATGTTATCCTTTTCTTCAAGTGA

>LoafORs6.54P

ATGAGATGGGAGAACCAGAGCAGTGTGTCTAAATTCCTCCTCTTGGGGCTCCCCAGCAGG

CCAGAACAGCAGGCCATGTTCTTCGCCTTGTTTCTGAGGATGTACCTCACCACGATACTG

GGAAACCTGCTCATTATCCTGCTCATCAGGCTTGGCTCTTGCCTCCACACCCCCATGTAC

TTCTTTTTTTCAGCTACTTGACCCTCACTGATGTCTCCTTTTCATCTGTCACCATCCCAA

AGATGCTGATGAATATGCAGACTCATATTCATCACCTATCCAGCATGTATTTCGCAGATG

TATTTTTATATGCTTTTTGGTGGTGTTGATAACTTCCTTTTTGCAGTGATGGCATATGAC

AGGTATGTGGTCATCTGTCACCTTCTACATTACACCACCATCATGAGGAAGGAGCTGTGT

GTCCTGCTGGTGGCTGGTGCCTGAACACTGTCCACTGGCAGTGCCCTATTGCACACCCTT

CTCCTGGCCCAGCTGTCCTTCTGTGCTGACAACACCATCAGCCCACTTTTTCTCTCGTCT

TCC

>LoafORs6.55

ATGAGGTCTAAGAACCAAAGCAATGTGTCTGAATTCCTCCTCCTGGGGCTCCCCATCCCG

CGTGAGCAGCAGGCCATGTTCTTTGCCTTGTTCCTGGGCATGTACCTCACCACGGTTTTC

GGGAACCTGCTCGTCATCCTGCTCATCAGACTGGACTCTCGTCTCCACACCCCCATGTAC

TTCTTCCTCAGCCACTTGTCCCTCAGTGACATCTCCCTTTCGTCTATAACTGTCCCAAAG

ATGCTGATGAACTTGAAAACTCACCATCGATCAATCCCCTACGTCGAGTGCATGTCACAG

GCCTATTGCTTCATACTTTTTGGTTGTACTGATAGCTTACTTCTTGCAGTGATGGCATAT

GACAGGTATGTAGCTATCTGTCATCCTCTGCACTACACCACCGTAATGAAAGGTGAGCTT

TGTATCTTCTTAGTGTCTGGGTGCTGGTTATTATCTTGTGTCCATGGCCTGTTACACACC

CTTCTCCTGTCCCGCTTGTCCTTCTGCACAGAGACTATCATCTCCCACTTCTTTTGTGAT

CTTGTTGCTGTGCTCAAGTCCTCCTGCTCAGATACCTCTCTCAATGAGCTGGTTATCTTT

ATTGAGGGAGGATTGTTCTTCATTGTGCCATTGAGTGGTATCTTGGGTTCTTATATCCGC

ACGGCAGTCATCATCATGAGAGTCCTCTCCGTCAAGAGAATCTCCAAAGCCTTGTCTACC

TGTGGTTCCCACCTCTTTGTGGTGTCTTTATACTATGGGACAGTTGCAAGTGTTTACTTT

TTCTCTTCATCAGACGAGTCCAAAGATAAGGACATAATTGCTTCTGTGATATATATGGTG

GTCATCCCCATGCTGAACCCCTTCATATACAGCCTGAGGAATAAAGATATAAAATGTGCT

TTTGATGGCTTTGTCAGGGCCAAGGAGCTCTCTTCATGTCATTAA

>LoafORs6.56P

CTGCCTTTTTTTTTTTTTTTTATTCCCAGCAGAGAGAAGAGCGGTATGAGGCCTGAGAAC

CAGAACATCAGGTCCAAATTCCTCCTCCTGGGGCTTTCCATAAGGCTGGAGTAACAGACC

ATGTTCTCTACCCTGTTCCAGGGCATGTATCTCTCCATGGTGCTGGGGAACCGGTTCATC

ATCCTGCTTATCAGGCTGGACTCTTGCCTGCACATTCCCATTCACTTCTTCCTCAGCCAC

TTGGCCTTCTCCGATGTCTCGTTCTCATCTGTTACTGTCCCAAAGATGTCGATAGACATG

CAGGCAAGTGACAAGTCCATTCCCTATGTGGAGTGCACTTTGCAGATGTATTTTTGGATA

CTTTTCATTTGTCTTGACAATCTCCTTCCTGTAGTCATGGCATATGACAGGTTTGTGGCC

GCCTGTCACCCTCTCCATTACCCCACCATCATGAGGGAGGAGCAGTGCACCTTATTGGTG

GTTGAGTTCTGGTTCTTCTCTTGCATCCATGCCCTGTTACACATCCTTCTCCTTTCTTGC

TTGTCCTTCTGTGCTGACAACACCATCCCC/CCCCACTTCTGTGACCTTACTGCCCTCTT

TAAGCTGATCTGCTCAGACACCTCCCTCAATGATCTAGTTATCTTAACTGTGGGGGGAGT

GCTTGTCCTTCTGCCACTGAATGCTATTTCGGGCTCTTATGTCAGCATTGGGGCCACTAT

CCTGAAGGCTCCCTCCACCAAATGGATCTGTGAAGACTTGTCCACCTATGGCTCCCACCT

CTTCATGGTGTTTCTGTACTATGGGACTCTTGCAATTATTTACTTCTTTCCTTCATCAAA

CAATTCCAAAATCAAGGACATAATTGTTTCAGTTACGTGTATAGTAGTGACCTCCATGAT

CTACAGCCTGAGGAACAGAGACATGAAATTGGCTCTGGGGATGCTTTATAGAGGTGGGGT

T

>LoafORs6.57P

ATGACCATGGAAAGAGCCAACCAAACCAGCAGTGTCTCTGAGTTCATCCTCCTAGGACTG

TCCTCAAGGCCTGAGGACCAGAAGCCACTCTTTGTCCTCTTCCTCACCATGTACCTTGTC

ACTATAACAGGGAACCTGCTCATCATTCTGGCCATCCACTCTGATCCCCAGCTCCAGACA

CCCATGTATTTCTTCTTGAGTTTCCTGTCTTTTACTGACATTTGCTTCACAACAACCATT

GTTCCCAAGATGCTGGTGAACTTCTTGTCCTTGAAGAAGACCATCTCCTATGCTGGATGT

CTGACACAGATGTATTTTTTCTATGTCTTCGGCAATACCGACAGTTGCCTTCTGGCAGCC

ATGGCCATTGACCGCTATGTAGCCATCTGTGACCCCTTTCACTGTGTCACCATCATGAGC

CACCATCGCTGCTACCTGCTGCTGGCCTTCTCCTGCTCATTTCCTCACCTTCACTCCCTC

CTGCATACACTTCTGCTGAATCTTCTCACCTTCTGTGACTCCAATGTTATCCAACACTTC

CTCTGTGACATCAACCCTCTCCTGAAATTGTCTTGCTCTTCCACATTTGTCAAT/ATCAC

AATAAAGACAGAAGGAGTAATTGTTTTTGTGACTCCCTTCCTATGCATTTCTTTCTCTTA

TGTAAGAATCCTCATTGCAGTTCTCAAAATTCCCTCAGCTGTTGGAAAACGCAAAGCCCT

CTCCACCTGTAGTTCTCACTTCGCCGTGGTAACCCTCTTTTATGGAAGCATCTATTATGT

CTACTTACAGCCCTTGTCTAGCTACACTGTCAGGGACCGAGTGGCAACAATTGGCTACAC

CATTTTGTCCTCCATGCTAAACCCTTTTATCTACAGCCTGAGGAACAAAGACATGAAGAG

GGGCCTGGGGAAGCTAATGAGCAGGAGGAAA

>LoafORs6.58P

GTGTCTGAATTCCTCCTCCTGGGGCTCCCCATCAGGCTAAAGGAGCAGTGCATATAATTC

TCCCTGTTCCTGGGCGTGTACCTCACCATGGAGCTGGGAAATCTGCTCATTATCCTGTTC

ATTTGGCTGGACTCTTGACTCTGCACCCCCATATATTTCTTCCTCAGCCACTTGATCTTC

ACTGACATCTCCTTCCCAATAGTTACAGCACCAAAGATGCTAATGAACATGCAGACACAA

AGTCAGCCTGTCTCATATGCTGGATGCATTTCCCAGGTGTATTTTTTCTTATTTTTTGGT

GAT/AATTGTGTTCTGGGCCTTATCCTTTGCCAGTGCTCTACTGCACACCTGCTCCTGGC

TCATCTCTCTTTCTGTGGAGACATTCTTCCCCACTTCTTCTGTGACCTTTCTGCCTTACT

TAAGCTGTCCAACTCAGACACCTCAATCAATGAGCTGGTTATCCTCACTGTGGGGGTGGA

GGTCGTTACCCTTCCATTCAAACACATTCTGGTCTCTTATGGTCTCATCGGGTCCACCAT

CCTGAAAGTCCCCTCAACCAAGGGAATTTGCAAAGACTTGTCCAACTGTGGCTCCCACCC

CTCTGTGGTGTCTCTATACTACGGTGCAATTATTGGATTGTACATTTTCCACTCATCCAG

TAACTCC

>LoafORs6.59

ATGAGGTCGGAGAACCAGAGCAGCATGTCCGAATTCTGCCTCCTGGGACTCCCCATCAGG

CCAGAGCAACAAGGCATGTTCTTCATCTTGTTCCTCAGCATGTACCTCACCACCGTGCTG

GGGAACCTGCTCATCATCCTGCTCATCAGGCTGGACTCTCGACTCCACACCCCCATGTAC

TTCTTCCTCAGCCACTTGGCCCTCACTGACGTCTCCTTTTCATCTGTCACCGTCCCAAAG

ATGCTGATGAACATGCATACTCAAGATCAATCCATCCCCTATGCAGGATGTGTAACACAG

ATGTATTTTTTCATACTTTTTGGTTGTATTGATAACCTTCTTCTTGCAGCGATGGCATAT

GACAGGTATGTGGCCATCTGTCACCCTCTACACTACACCACCATCATGAGGGAGGAGCTG

TGCATATTTCTATTAGCAGGATCCTGGCTCCTGTCATGTGCCAGTGCCCTGTCCCACACC

CTCCTCCTGGCTCGATTGTCCTTCTGTGCTGACAGCACCATCCCCCACTTCTTTTGTGAC

CTTGCTGCCCTGCTCAAGCTGTCCTGCTCAGACACTTCCCTAAATGAGATGGTTATCTTT

GGTGTTGGGGGATTTGTCATCATCCTGTCTTTTATTGGTGTTCTAGTCTCTTATGGCCAC

ATAGGGGCCACCATCCTGAGGTTCCCATCAATCAAGGGGATCTGTAAAGCCTTATCCACC

TGTGGCTCCCACTTCTCTGTGGTTTTTCTATTCTATGGGACGATTGTGGTATTGTACTTT

TTCCCATCATCGAGCAACTCTACTGACAAAGACATAATTGCTTCAGTAATGTACACTGTG

GTCACCCCCATGTTGAATCCCTTTATCTACAGCCTGAGGAACAGAGACATGAAAGGGGCC

ATGGGGAAACTTGTCAGAAGGGAAATATTTTTATCCAAGTAA

>LoafORs6.60

ATGAGGCTTCAGAACCAGAGCAGTGTGTCCGAATTCCTTCTCTTGGGGCTCCCCATCCGG

CTGGAGCAGCAGGCCATGTTCTTTGCCCTGTTCCTGGGCATGTACCTCACCACGGTTTTG

GGAAACCTGCTCATTATCCTGCTCATCAGGCTGGACTCTCGCCTCCACACCCCCATGTAC

TTCTTCCTCAGCCACCTGGCCCTCACTGACGTCTCCTTTTCATCTGTCACTGTCCCGAAG

ATGCTGATGAACATGCATACTCAAGATCAATCCATCCCCTATGCAGGGTGTGTAACACAG

ATGTATTTTTTCATATTTTTTGGTTGTATTGATAACCTCCTTCTTGGGGTGATGGCATAT

GACAGGTATGTGGCCATCTGTCACCCTCTCCACTATACTGCCATCATGAGAGAAAACCTG

TGTTTCTCACTTGTGGCTGGGTCCTGGTTATTCTCATGTAGCAGTGCAATGTCCCACACT

CTCTCACTGGCCCGGCTGTCCTTTTGTGGTGATAATACCATCCCTCATTTCTTTTGTGAT

CTTGCTGCTCTGCTCAAATTGTCCTGCTCCGACACCTCCATCAATGCGCTGGTCATCTTC

ACTGTGGGGGCATTGGGCATCATCATACCACTGACTGGTATCCTGGTCTCTTATGTCCGC

ATTGGGGTATCCATACTGAGAGTTCCCTCTGCCAAAGGGATCTGCAAAGCCTTGTCCACC

TGTGGGTCCCATCTCTCTGTGGTATTTCTGTTCTACGGGACGATTATGGTACTATACATT

TTTCCGTCATCTAACAACTCCAATGACAAGGACATAACTGCTTCAGTGATGTACACAGTG

GTCACTCCAATGCTGAACCCTTTCATCTATAGCCTGAGGAACAGAGACATGAAAGGGGCC

CTGGGGAGGCTTTTCCGGGGGGAGATTTTTTTCTCCAAGTGA

>LoafORs6.61

ATGCAGTGGGAGAATGAGAGCAGTGTGTCTGAATTCCTCCTCCTGGGGCTCCCCATCCAG

CAGGAGCAGCAGGCCGTGTTCTTTGCCTTGTTCCTGGGCATGTACCTCACCACGGTGCTG

GGGAACCTGCTCATCATCCTGCTCATCAGACTGGACTCTCGCCTCCACACTCCCATGTAC

TTCTTCCTCAGCCACTTGGCCCTCATTGACATCTCCTTTTCATCTGTCACTGTCCCGAAG

ATGCTGATGAGTATGCAGACTCAACACCTATCCATCTCCTATCCAGAGTGTATTTCACAG

ATGTATTTTTATATACTTTTTGCTTGTATTGATAACCTCCTTCTTGGAGTGATGGCATAT

GACAGGTATGTGGCCATCTGTCATCCTCTACACTACACCACCATCATGAGGAAGGAGTTC

TGTGTCTTGCTGGTAACTGGCTCCTGGATACTCTCTTGTGGCAGTGCCCTCTTGCACACT

CTTCTCCTGACCCAGCTGTCATTCTGTGCTGACAACACCATCCCCCACTTTTTCTGTAGT

CTCCCCATCCTACTTAAGCTTTCCTGCTCAAACACTTCTCTCAATGAGCTGGTCATATTT

ACTGCAGGGGCTGTGGTTGTCATCTTTCCATTGAGTGGCATCCTGCTCTCATATGGCCGC

ATTGGAGCCTCTATCTTAAGGGTCCCTTCTACCAAAGGTATCTGTAAAGCTTTGTCCACC

TGTGGCTCCCACCTCTCTGTAGTGTCTCTATTTTATGGAACAATAGTGGCACTGTACTTT

TCTCCCTCATTGAGCAACTCCAATGAGAAAGACATGATTGCCTCACTAATGTATACAGTA

GTGACCCCCATGTTGAATCCCTTCATCTATAGCCTAAGGAACAGAGACATGAAATTGGCT

ATGGGGATACTTTTCAGAAATGATATTCCTTTCTCCAAGTGA

>LoafORs6.62

ATGAGGCCTGAGAACCAGAGCAGTGTGTCTGAATTCCTCCTTCTGGGGCTCCCCATCCAA

CCAGAGCAGCAGGCCATGTTCTTTGCCCTGTTCCTGAGCATGTACCTCACCACAGTGCTG

GGGAACCTGCTCATCATCCTGCTCATCAGGGTGGATCCTCGCCTCCACACCCCCATGTAC

TTCTTCCTCAGCCACTTGGCCCTCAGTGACATCTCTCTTTCATCTGTCACTGTCCCAAAG

ATGCTGATGAACTTGAAAACTCACCACCAATCAATCTCCTATGTCGGGTGCATTTCACAA

ATGTATTTCTTCATAGTCTTTAGTTGTGCTGACAACCTCCTTCTTGCAGTGATGGCATAT

GACAGGTATGTGGCCATTTGTCACCCTCTGCACTATACCACCATAGTGAGGGGTGAGCTT

TGTATCTTCTTAGTAGTTGGGTGCTGGTTCTTTTCTTGTGTTCATGGTCTGTTGCACAGC

CTCCTCATGGGCCAGTTGTCCTTCTGTGCAGTAACTATCATCCCCCACTTCTCTTGTGAT

CTCACTGCTGTGCTCAAGTCCTCCTGCTCAGACACTTCTCTCAATGAGCTGGTTATCTTC

ACTGAGGGAGGACTGTTCTTCATTGTGCCATTGAGTGGTATCTTGGCTTCATATATCTGC

ATGGCAGTCACCATCCTAAGGGTCCTCTCCATCAAGAGAATCTCCAAAGCCTTGTCTACC

TGTGGCTCCCACCTCTTTGTGGTGTCTTTATACTATGGGACACTTGCAGGCATTTACTTT

TTCTCCTCATCAGGCCAGTCCAAAGATAAGGACACAATTGCTTCTGTGATGTACATGGTG

GTCACCCCCATGCTGAACCCCTTCATATACAGCCTGAGGAATAAAGATATAAAATGTGCT

TTTGATGGCTTTGCCAGGGCCAAGAACTTCTCTTGA

>LoafORs6.63

ATGAGCCCTGAGAATCAGAGCAGTGTACCTGAATTCCTCCTTCTGGGGCTCCCCATCGGG

GTGGAGCAGCAGGCCATGTTTTTCGCCCTGTTCCTGAGCATGTACCTCACCACGGTGCTG

GGGAACCTGCTCATCATCCTGCTCATCAGGCTGGACTCTCGATTCCACACTCCCATGTAC

TTCTTCCTCAGCCACTTGGCCTTTTCTGATGTCTCTTTCTCATCTGTCACTGTCCCAAAG

TTGTTGATAAACATGCATACTTTAGATCAGTCTATCTCCTATGTAGGGTGCATTTCACAG

ATGTATTTTTTCATACTTTTTGTTTGTCTTGACAATTTTCTTCTCGCAGTGATGGCATAT

GACAGGTTTGTGGCCATCTGTCACCCATTGCACTACACCACCATCATGAGGGAAGAGCTG

TGTGTCTTATTGGTGGTTGGGTCCTGGTTCTTCTCTTGTGTCCATGCCCTGTTACACACC

CTTCTCCTGTTCCACTTGTCCTTCTGTGCTGACAACACCATCCCCCACTTCTTCTGTGAC

CTCACTGTCCTCCTTAAGCTGACCTGCTCAGATATCTCCCTCAATGAGCTAGTTATTGTC

ACTGAGGGGGGAGTGCTTGCCCTCCTGGCATTGAGTGTTATTTTGGGGTCTTATGTCAGC

ATTGGGGCCACCATCCTGAAGGTCCCCTCCACCAAGAGGATCTGCAAAGCCTTGTCCACC

TGTGGCTCCCACCTCTTCGTGGTGCTTCTGTATTATGGGACTCTTGCAATTATTTACTTC

TTTCCTTCATCAAACAATTCCAAAATCAAGGACATAATTGCTTCAGCTATGTATTCAGTG

GTTACCCCCATGCTCAACCCCTTCATCTATAGCCTGAGGAACAGAGACATGAAATTGGCT

CTGAGGATGCTTTACAGAGGGGGGATTATTTTTGCCAAGTGA

>LoafORs6.64P

TTTTTCCTCTTCCTCACCCTGTACCTCATCACCGTAGCAGGGAACCTGTTTATCATTCTG

GCCATCCACACTGATCACCATCTATAGACACCCATGTATTTCTCCCTGAGCGTCTTGTCT

TTCACTGACATTTGGTTCACAACAGCCATTGTTCCCAAGATGCTGGTGAACTTCTTGTCC

ACTAAGAAGACCATCTCCTACACTGGGTGCCTGACACAGATGTATTTTCTCTATGCTTTT

GGCAACACTGACAGTTGCCTTCTGGCAGCCATGGTCATTGACCGCCATATAGCCATCTGT

AACCCTTTCCACTATGTTACCATCATGAGCCATCATCACTGCTTCCTGCTGTTGGCCTTC

TGCTGCTCATTTCCTCACCTTCACTCCCTCCTGCATACACTTCTCCTGAATCTTCTCACC

TTCTGTGACTCCAATGTTATTCAAAACTTCCTCTGTGACATCAACCCTCTCCTGAAATTG

TCTAGCTCTTCCATATTTGTCAATGATATCACAATAAAGACAGAAGGAGTGGTTGTTTTG

GTGACTCCCTTTCTATGCATTTCTTTTTCTTACGTACGAATCCTCATTGCAGTTCTCAAA

ATTCCCTCAGCTGCTGGAAAACGCAAAGCCTTCTCCACATGTGGTTCTCACTTCACTGTG

GTGACCATCGTTTATGGAAGCGTCTTCTATGTCTACTTACAGCCCTTGTCTAGCTACACC

ATCAGGGACCGGCTGGCAATAATTGGCTACACCATTTTGTCCTCCATGCTAAACCTTTTT

ATCTACAGCCTGAGGAACAAAGACATGAAGAGGGGCCTGGGGAAGCTGATGTGCAGGAGG

AAACCC

>LoafORs6.65

ATGGAAAGAGTCAACCAAACCACCAGTGTCTCTGAGTTCATCCTCCTGGGACTGTCCTCA

CGGCCCGAGGACCAGAAGCCACTCTTTGTCCTCTTCCTCACCATGTACCTCATCACCATA

ACAGGAAATCTGCTCATCATTCTGGCCATCCACTCTGATCCCCAGCTCCAGACTCCAATG

TATTTCTTCTTGAGTTTCCTCTCTTTCACTGACATTTGCTTCACAACAACCATTGTTCCC

AAGATGCTGATGAACTTCTTGTCTGAGAAAAAGACCATCTCCTATGCTGGGTGCCTGACA

CAGATGTATTTTTTCTATGCTTTGGGCAACACTGATAGTTACATCTTGGCAACCATGGCC

TTTGACCATTATGTGGCCATCTGTGACCCCTTCCACTATGTCACGACCATGAACCACCAC

CACTGTGTCCTGCTGCTGGCCTTCTCCTGTTCCATCTCTCACCTCCATTCCCTTCTGCAC

ATTCTCCTGCTGAATCTTCTCACCTTCTGTGACTCCAATGTTATCCACCACTTTCTCTGT

GAAATCAACCCTTTGCTGAAATTGTCCTGCACCTCCACATTTGTCAATGAAATTGTGATA

AAGACGGAAGCACTGGTTATTTTGGTGACCCCCTTTTTATGCATTTCTTTCTCTTATATA

AGAATCCTCATCACGGTTAACAAGATTCCTTCCACTGCAGGGAAACACAAAGCTTTCTCC

ACATGTGGTTCTCACCTCACTGTGGTAACCCTATTTTATGGAAGCATCTTCTATGTCTAT

TTACAGCCCCTGTCCAGCTACACTGTCGGGGACCGAGTGGCAACAATTGTCTACACAGTT

TTATCCTCCATGCTAAACCCATTTATCTACAGCCTGAGAAACAAAGACTTGAAACGGGGC

CTAAAGAAGCTGATGGGCAGGAGGAAATCCTAG

>LoafORs6.66

ATGCTAGCTGCCATATCTCAGTCCCTCACATTTCTTACTCTCCTTATTCCTAGCAGAGAG

AAGAGCACTATCAGGCCTGAGAACCAGAGCAGTGTGTCTGAATTCCTCCTCCTGGGGCTC

CCCATCAGGCCGGAGCAGCAGGCCATGTTCTCTGCTCTGTTCCTGGGCATGTACCTCACC

ACGGTTTTGGGGAACCTGCTCATCATCCTGCTCATCAGGCTGGACTCTCGCCTCCACATT

CCCATGTACTTCTTCCTCAGCCACTTGGCCTTTTCTGATGTCTCTTTCTCATCTGTCACT

GTCCCAAAGTTGTTGATAAACATGCATACTCGAGATCAGTCTATCCCCTACGTAGGGTGC

ATTTCACAAATGTATTTTTTCATACTTTTTGTTTGTCTTGACAACTTACTTCTTGCAGTG

ATGGCATATGACAGGTTCATGGCCATCTGTCACCCACTACGCTACACCACCATCATGAGG

CAGGAGTTGTGCATCTTATTGGTGGTTGGGTCCTGGTTCTTCTCTTGTGCCCATGCCCTG

TTACACACCCTTCTCCTGTCCCACTTATCCTTCTGTGCTGACAACACCATCCCCCACTTC

TTCTGTGACCTCACTGCCCTCCTTAGGCTGACCTGCTCAGACACCTCCCTCAACGAGCTA

GTTATCTTCACTGAGGGGGGAGTGCTTGTCCTTCTGCCACTGAGTGTTATTTTGGGGTCT

TATGTCATCATTGGGGCCACCATCCTGAAGGTCCCCTCCACCAAGAGGATCTGCAAAGCC

TTGTCCACCTGTGGCTCCCACCTCTTCGTGGTGTTTCTGTATTATGGGACTCTTGCAATT

ATTTACTTCTTTCCTTCATCAAACAATTCCAAAATCAAGGACATAATTGCTTCAGCTATG

TATTCAGTGGTTACCCCCATGCTGAACCCCTTTATCTACAGCCTGAAGAACAGAGACATG

AAATTGGCTCTGCAGATGCTTTACAAAGGGGGGATTATTTTTGCCAAGTGA

>LoafORs6.67

ATGACCATGGAAACAGTCAACCAAACCACCAGTGTCTCTGAGTTCATCCTCCTGGGACTG

TCCTCACGGCCCGAGGACCAGAAGCCACTCTTTGTCCTCTTCCTCACCATGTACCTCATC

ACCATAACAGGAAACCTGCTCATCATTCTGGCCATCTACTCTGATCCCCAGCTCCAGACA

TCCATGTATTTCTTCTTGAGTTTCCTGTCTTTCACTGACATTTGCTTCACAACTACCATT

GTTCCCAAAATGCTGGTGAACTTCTTGTCCACTAAGAAGACCATCTCCTATGCTGGATGT

CTGACACAGATGTATTTTCTCTATGCTTTTGGCAACACTGACAGTTGCCTTCTGGCAGCC

ATGGCCATTGACCGCTATATAGCCATCTGTAACCCTCTCCACTATGTTACCATCATGAGC

CATCATCACTGCTTCCTGCTGTTGGCCTTCTGCTGCTCATTTCCTCACCTTCACTCCCTC

CTGCATATACTTCTGCTGAATCTTCTCACCTTCTGTGACTCCAATGTTATCCAGCACTTC

CTCTGTGACATCAACCCTCTCCTGAAATTGTCTTGCTCTTCCACATTTCTCAAAGATATC

ACAATAAAAACAGAAGAAGTGGTTATTTTAGTGACTCCCTTTCTATGCATTTCTTTCTCT

TATATAGGAATCCTTATTGCGGTTCTCAAAATTCCCTCAGCTGCTGGAAAATGCAAAGCC

TTCTCCACTTGTGGTTCTCACTTCACCGTAGTGACCATCTTTTATGGAAGTATCTTCTAT

GTCTACTTACAGCCCTTTTCTAGCTACACTGTCAGGGACCAGGTGGCAACAATTGGCTAC

ACCATTTTGTCCTCCATGCTAAACCCTTTTATCTACAGCCTGAGGAACAAAGACATGAAG

AGGGGCCTGGGGAAGCTGATGTGCAGGAGGAAATTCTAG

>LoafORs6.68

ATGGAAAGAGTCAACCAAACCACCAGTGTCTCTGAGTTCATCCTCCTGGGACTGTCCTCA

TGGCCCGAGGACCAGAAGCCACTCTTTGTCCTCTTTCTCACCATGTACCTCATCACCATA

ACAGGAAATCTCATCATTCTGGCCATCCACTCTGATCCCCAGCTTCAGACACCCATGTAT

TTCTTCTTGAGTTTCCTCTCTTTCACTGACATTTGCTTCACAACAACCATTGTTCCCAAG

ATGCTGAGGAACTTCTTGTCTGAGAAAAAGACCATCTCCTATGCTGGGTGTCTAACACAG

ATGTATTTTTTCTATGCTTTGGGCAACACTGACAGTTACATCTTGGCAGCCATGGCCTTT

GACCGTTATGTGGCCATCTGTGATCCCTTCCACTATGTTACGACCATGAGCCACCACTAC

TGTGTCCTGCTGCTGATCTTCTCCTGTTCCATCTCTCACCTCCATTCCCTTCTGCACATT

CTCCTGCTGAATCTTCTCACCTTCTGTGACTCCAATGCTATACACCACTTTCTCTGTGAT

ATCAATCCTTTGCTGAAATTGTCCTGCACCTCCACATTTGTCAATGAAATTGTGATAAAG

ACAGAAGGGCTGGTTATTTTGGTGACCCCCTTTTTATGCATTTCTTTCTCTTATATACAA

ATCCTCATCACAGTTATCAAGATTCCCTCTGCTGCAGGGAAACACAAAGCTTTCTCCACC

TGTGGTTCTCACCTCACTGTGGTAACCCTATTTTATGGAAGCATCTTCTATGTCTATTTA

CAGCCCCTGTCCAGCTACACTGTTGGGGACCAAGTGGTAACAATTGTCTACACAGTTTTA

TCCTCCATGCTAAACCCTTTTATTTACAGCTTGAGAAACAAAGACTTGAAACGGGGCCTA

AAGAAGCTAATGAGCAGGAGGCAATCCTAG

>LoafORs6.69P

ATGCTAACTGCCACATCTCAGTCCCTGACATTTCTTACTCCTCTTATTCCCAGCAGAGAG

AGGAGCAGTATGAGGTCCGAGAACCAGAGCAGCCTGTCTGAATTTTTCCTCCTGGCGCTC

CTCCTCTTGGAGGAGCAGCAAGGTATGTTCTTCACCCTGTTCCTGGGCATGAACCTCACC

AAGATGTTGGAGAATCTGCTCATCAGGTTGTACTGTTGCCTGCACACCCCCATGTACTTC

TTCCTCAGCCCCTTGGCATTTTCTGATGTCTCTTTCTCATCTGTCACTGTCCCAAAGATA

TTGATAAACATGCATACTCAGGATCAGTTCATTCTCTATGTGGGGTACATTTCACAAATG

TATTTTTTCATACTTTTTGTTTGTCTTGACGATTTTCTTCTTGCAATGATGGCATATGAG

AGGTTCATGACCATCTGTCACCCACTGTACTACACCACTCTCATGAGGGAGGAGCTGTGC

ATCTTCTTGGTGGATGGATCCTTGTTCTTTTTTTGTGCCCATGTCCTGTTACACACCCTT

CTCCTGTCCCACTTGTCCTTCTGTGCTGACAACACCATCCCCCACTTCTTCTGTGACCTC

ACTGCCCTCCTTAAGCTGACCTGCTCAGACACCTCCCTCAACGAGCTAATTATCTTCACT

GAGGGGGGAGTGCTTGTCCTTCTGTCACTGAGTGCTGTTTTGGGCTCTTATGTCAGCACT

GGGCCCACCAACCTAAAGGTCCCCTCTACCAAGAGGATCTGTAAAAGCTTGTCTGCCTGT

GGCTCCCACCTCTTGGTGGTATTTCTGTATTATGGAACTCATGCAATTATTTACTTCTTC

>LoafORs6.70

ATGACCATGGAAAGAGCTAACCAAACCACCAGTGTCTCTGAGTTCATCCTCCTGGGACTG

TCATCACGGCCCGAGGACCAGAAGCCACTCTTTGTCCTCTTCCTCACCATGTACCTCATC

ACCATAACAGGAAACCTGCTCATCATTCTGGCCATCCACTCTGACCCCCAGCTTCAGACA

CCCATGTATTTCTTCTTGAGTTTCCTGTCTTTCACTGACATTTGCTTCACAACAACCATT

GTTCCCAAGATGCTGGTGAACTTCTTGTCCACTGAGAAGACCATCTCCTATGCTGGATGC

CTGACACAGATGTATTTTCTCTATGCTTTTGGCAACACTGACAGTTGCCTTCTGGCAGCC

ATGGCCATTGACCGCTATGTAGCCATCTGTAACCCTTTCCACTATGTTACCATCATGAGC

CACCATCGCTGTTTCCTGCTGTTGGCCTTCTGCTGCTCATTTTCTCACCTTCACTCCCTC

CTGCATACACTTCTGCTGAATCTTCTCACCTTCTGTGACTCCAAAGTTATTCAAAACTTC

CTCTGTGACATCAACCCTCTCCTGAAATTGTCTTGCTCTTCCACATTTGTCAATGATATC

ACAATAAAGACAGAAGGAGTGGTTGTTTTGGTGACTCCCTTTCTATGCATTTCTTTTTCT

TACATACGAATCCTCATTGCAGTTCTCAAAATTCCCTCAGCTGCTGGAAAACGCAAAGCC

TTCTCCACTTGTGGTTCTCACTTCACTGTGGTGACCATCTTTTATGGAAGCATCTTCTAT

GTCTACTTACAGCCCTTGTCTAGCTATACTATCAGGGACCGGGTGGCAACAATCGGCTAC

ACCATTTTGTCCTCCATGCTAAACCCTTTTATCTACAGCCTGAGGAACAAAGATATGAAG

AGGGGCCTGGGGAAGCTGATGTGCAGGAGGAAACCCTAG

>LoafORs6.71P

GGGACTGTCCTCAAGCCCAAGGACGAGAAGCCACTCTTTGTCCTCTTCCTCACCATGTAC

CTCATCACCGTAACAGGAAACCTGTTCATCATTCTCGTCATTCGCTCTGATCCCCAGCTC

CAGAACCCAAAGTATTTCTTCTTGAGTTTCCTGTCTTTCACTGACAGTTGTTCCCAAAAT

ACTGGTGAACTTCTTGTCCAAGTAAAAGACCATCTCCTATGCTGGGTGTCTGACACAGAT

GTATTTTCTGTATGCTTTGCGTAACACCAACGGTTGCATCTTGGCAGCCATGGCCTTTGA

CCATTATGTGGCCATCTGTGATCCCTTCTAGTATGTCACTACCATGAGCCACCACTGCTG

GGTCCTGCTGCTGGCCTTATCCTGTTGCATCTCTTATCTCCATTCCCTCCTGTACATTCT

CCTACTGAATCTTCTCACCTTCTATGACTCCAATGTATCCAACACTTCCTCTGTAATATC

AAGCCTTTGCTGAAGTTGTCCTGCACCTCAACATTTGTAAATGAAATTGTGATAAAAATA

GGACTGGTTATTTTGGTGACCCCTTTTTTATTCATTTCTTTCTCTTATGTACGAATTCTC

ATCAGGGTTATCAAGATTCCCTCCACTGCAGAGAAACACAAAGTGTTCTCCACCTATTGT

TCTCACCTCACTGTGGTAACCCTCTTCTGTGGAAGCATCTTCTATGTCTATTTACAGCCT

CTGTTCAGCTACACTGTCAGGGACTGAGTGGAAACAATTGTCTGCACAGTTTTATCCTCC

ATGCTAAACCCTTTTATTTACAGCCTGAGAAACAAAGACCTGAAACGGGGCCTAAAGAAG

CTGATGGGCAGGAGGAAATCC

>LoafORs6.72

ATGGAAAGGGTCAATCAAACCAACAGTGTCACTGAATTCATCCTCCTGGGACTATCCTCC

CGGCCAGAGGAGCAGAAGCCACTTTTTGTCGTCTTCCTCACCATGTACCTCATCACTGTG

GTGGGGAACTTGCTCATCATTCTGGTCATCCACTCAGACACTCGGCTGCAGACACCCATG

TATTTTTTCCTCAGCACCCTATCCTTCACTGATGTTTGCTATACAACAACCATCATTCCC

AAAATGCTGGTAAACTTTCTATCAAAGAAGAAGACCATCTCCTATGCTGAGTGTATGATC

CAAATGTATTTCTTCTTGGCTTTTGCCAACACAGAAAGCTACCTCCTGGCAGCCATGGCC

ATTGACCGCTATGTTGCCATCTGTGACCCCTTCCACTATGTCACCACCATGAGCCACCAC

CGCTGTGTCCTGCTGCTGGCCTTCTCCTGCTCCATCTCTCACCTCCATTCTCTCTTGCTA

GTTCTTCTGATAAATCGTCTCATCTTCTGTGATTCCAATGTTATCCACCACTTCCTCTGT

GACATCAACCCTCTATTGAAATTGTCCTGCTCCTCCACATTTGTCAATGAAATTGTAATT

AACACAGAAGGATTGATAACCTTGGTGACACCCTTTATTTGCGTCATCATCTCTTACCTA

CGAATTCTCATTGCTGTTCTTAAGATCCCCTCAGTTGCTCGGAAGCAGAAAGCCTTCTCC

ACCTGTGGCTCCCATCTCACCATGGTGACCCTCTTTTATGGAAGCATCATTTACGTTTAT

TTCCAACCCCTGTCCAGCTACACTGTCAAGGATCGGGTGGCAACAGTCATCTACACAGTT

TTGTCCTCCATGCTAAACCCTTTCATCTACAGCCTGAGAAACAAAGACATGAAGCGAGGC

CTGGAGAAGCTGATGGGCAAGAAGAAGTCCTAG

>LoafORs6.73P

AATTTCACAATTTGGACATTTTTTTGCCTGGAGGGCTTTTCCAGATATCAAAAATTAGAG

ATTGTGCTCTTCGTATTCAGCCTTGTAATGTATCTAATAACCCTCTTGGGCAACAGCACT

CTTCTTTTAATCATTATCATAGATTCACGCCTTCATACCCCCATGTACTTGTTCCTTGGA

AATCTCTCTTTCATGGATATTTGTTATACATCTGCTTCTATTCCCACTTTGCTGGTGAAC

CTGCTATCATCTCAGAAAACTATCGTCTTTTCTGGGTGTGCTGTACAGATGTATCTGTCC

CTTGCCATGGGTTCCACAGAGTGTGTGCTCCTGGCTGTGATGGCGTATGACCGATACATG

GCCATTTGCAATCCTCTGCGATACTCCATCATCATGAACGGGCAGGTCTGTGTACAGATG

GCCTCTGTCTCCTGGGTGACAGGCTGTCTGACTGCTCTGCTGGAGACCAGTTTTGCCCTG

CAGGTACCACTCTGTGGGAATCTCGTTGATCACTTCAAGTGCGAAATTTTGGCTGTGCTA

AAATTAGCTTGCACAAGTTCGCTGTTCATAGACATGATGGTGCTAGCGATCAGTGTACTC

CTCCTGCCCATTCCACTGCTCTTAATTTGTATCTCTTACATCTTCATCCTTTCCGCTATC

CTGAGAATCAGCTCAGCAGAGGGAAGAAACAAAGCTTTTTCTACTTGTGGTGCCCACTTG

ACGGTGGTGATTTTGTATTATGGGGCTGCCCTCTCCATGTACCTAAAGCCTTCTTCATCA

AACTCACAAGAAATAGACAAAATCATCTCATTGCTTTATGGCGTGCTGAACCCCATAATT

TACAGTTTAAGAAACAAGGAAGTCAAAGATGCTGTGAAA

>LoafORs6.74

ATGGCGATAGGGAATCACTCTTCCGTGACTGAATTCTTCCTGGTGGGGCTTTCCCAATAC

CCGGAGCTCCAGCTTTCTCTGTTTGTGCTCTGCCTCATCATGTACCTGATAATCCTCCTG

GGAAACAGCCTCCTCATTACCATCAGCATCCTAGATTCCCGCCTCCACACCCCTATGTAT

TTCTTCCTTGGGAACCTCTCATTCTTGGATATCTGTTATACAACATCAACCATTCCTCAA

ATGCTCATCACATTTGGATCTGAGAGAAAATCCATCTCTTTCATTGGCTGTGTACTGCAG

ATGGTTGTGTCACTTGGTTTGGGCTCCACTGAATGTGTCCTCCTTGCTATGATGGCCTAT

GACAGGTACGTGGCCATCTGCAACCCACTGAGGTACCCCATCATCATGAACAGGGTACTA

TGTATGCACATGGCCACATGGTCCTGGATCACAGGCTATCTGAACTCCCTAGTACAAACA

AGCTTTACAATGGTGTTGCCTTTCTGTGGGAATAATATCATTGATCATATTACTTGTGAG

ATCGTAGCTCTACTTAAACTTGTCTGCTCAGATATCACCATCAATATACTTATCATGACA

GTGGAAAGTATTGTTTTACTGATGATTCCTCTGACGTTAATTTTTATCTCATATGTTTTT

ATTCTCTCTTCCATACTGAGAATTAATTCTGCTGAGGGAAGAAAGAAAGCCTTTTCTACC

TGTTCTGCTCACCTGACTGTTGTCATCTTATTCTATGGTTCAGCCCTTTTTATGTACATG

AAGCCCAAGTCAAAAGACACAAAGACATCTGATGAGATCATTGGACTGTCTTATGGTGTG

GTGACCCCAATGTTGAACCCAATCATCTATAGCCTGAGGAACAAGGAGGTAAAAGAGGCT

GTGATGAAAGTCCTGAATAGACACCTACATCGATGGAAAATATGTAAGGCCTTGAGGCAT

GTGATATCCTTAATGAGGAACAAGATCAGGTCTTTTGCATTCACAAATGAAGTCAGAGAA

CCCAGAGTCAAGGGAGCTTTTGTGCTTGCAAAGCCAATTATGGAACTCCCATGCTTTTCA

ACATAG

>LoafORs6.75

ATGGAGAATTACTCTGCTGTGACTGAATTCTTCCTGGTGGGGCTTTCCCAATACCCAGAG

CTCCAGCTTTCTCTGTTCGTGCTCTGCCTCATCATGTACCTGATAATCCTCCTGGGAAAC

AGCCTCCTCATTATCATCAGCATCCTAGATTCCCGCCTCCACACCCCCATGTACTTCTCC

CTTGGGAACCTCTCATTTTTGGACATCTGTTACACATCCTCTTTTGTTCCTCCAATGCTT

ATCATATTTAGCTCTGAAAGAAAATCCATCTCCTTCACTGCATGTGCTCTTCAGATGGGT

GCCTCCCTTGCCTTGGCATGCACTGAGTTTGTTCTCTTGGCTGTGATGGCCTATGACAGG

TACACGGCCATCTGTAACCCACTGAGGTACCCCATCGTTATGAACAGGATACTCTGTGTG

CACATGGCTGCGTGGTCCTGGATCATAGGCTGTCTGAACTCCCTAGTGCAAACAGTTCTG

ACAATGATGTTACCTTTTTGTGGGAATAATGTCATTGACCATCTTGTGTGTGAGTTACTG

GTTCTTCTTAAACACATCTGCTCAGATATCTCCATCATTGTGCTTATGTTAACAGTGGGA

ACTACTGTTTTTTTAGTGATTCCTCTACTGTTAATTTTCATCTCCTATGTTTTTATCCTC

TCTACCATCCTGAGACTTAAATCCACTGAGGGGATAAAGAAAGCATTTTCCACCTGTTCA

GCCCACCTGGCTGTGGTGATCTTATTCTATGGTTCAGCCCTTTTTATGTACACGAAACCA

AAATCGAAGGACACAAAGACATCTGATGAGATAATTGGGCTGTCTTATGGAGTGGTGGCT

CCAATGTTGAACCCTATCATCTATAGTCTGAGGAACAAGGAGGTAAAAGAGGCTGTGAAG

ACAGTCCTGAGCAGATACCTGTACTCACTGAAAATATGA

>LoafORs6.76

ATGGGAAGGACCAATCAATCTGTGACAGAATTTGTCCTGCTGGGGCTTTCTGGCTACCCA

GAGCTTGAGGCCATTTACTTTGTGTTGGTCCTGTGTATGTACCTGGTGATCCTGCTGGGA

AATGGACTCATTATCATTGTAAGTGTCTTCAACTCCCATCTACACACTCCCATGTACTTT

TTCCTCAGTAACTTATCATTCTTGGACGTTTGTTATACCAGTTCTTCTATTCCTCTGTTT

CTCAGCAGCTTCTTAACTTCAAAGAAAACGATTTCCTTCCCTGGGTGTGGAGTGCAAATG

TTTCTCTCTTTTGCTATGGGAGCCACAGAGTGTGTCCTTCTAAGTATGATGGCGTTTGAC

CGCTATGTGGCCATCTGTAATCCTCTGAGATATCCCATCATCATGAGCAAGGCTTCATAT

GTGCCTATGGCTGCTGGATCCTGGATTGCAGGGGGTGTCAATTCTGTGCTGCAAACCTCT

CTTGCAATGCGGCTTCCTTTCTGTGGGGATAATGTCATTAATCATTTCACTTGTGAAATT

TTGGCTGTCTTAAAATTGGCTTGTGCTGACATCTCCGTAAATGTTATTAGCATGATTGTT

GCAAATATGATTTTTCTTGTGGTCCCAGTACTTTTCATTTTTATTTCCTATGTTTTCATT

CTCTCCACCATCCTGAGGATTCCTTCTGCAGAAGGAAGGCGCAAAGCCTTCTCTACTTGC

TCTGCGCACCTGACAGTGGTGATTGTATTCTATGGGACCATCCTCTTTATGTATGCACAG

CCCAAGGCTAAAGACTCTTCTGGTGCAGACAAAGAACAAGTTGCAGACAAAATCATCTCT

CTTTTCTATGGAGTGGTGACTCCCATGCTCAATCGTCTCATTTACAGTTTGAGGAACAAG

GATGTGAAGGCAGCTGTAAAGAATATGCTATGTCAGAAACTCTCCTCTGAGGGATTGTAG

>LoafORs6.77

ATGGAATGGGAAAACCAAACCATTCGGGTGGAATTCTTTCTGAAGGGCCTTTCTGGTTAC

CCAAGGCTCGAGCTACTCTTTTTTGTTCTGATCTTAATAATGTATGTGTTCATTCTTCTG

GGCAATGGCACCCTTATTTTAATCAGCATCTTGGACTCTCACCTTCACACACCCATGTAC

TTCTTCCTGGGGAATCTCTCCTTCCTGGACATCTGCTACACCACCACCTCCATTCCCTCC

ACACTGGTGAGTTTCCTCTCAGAGAGAAAGACCACTTCCTTTTCTGGCTGTGCAGTGCAG

ATGTTCCTTGGTTTGGCCATGGGGACGACAGAGTGTGTGCTCTTGGGCATGATGGCCTTT

GACCGCTTCGTGGCCATCTGCAACCCTCTGAGATATCCCATTATTATGAGCAAGAATTCC

TATGTGCCCATGGCATCCGGGTCCTGGTTTGCGGGGGTTGTCAACTCTGCAGTACAAACA

ATGTTTGTGGTACAATTGCCTTTCTGCAGGACTAACATCATCAATCATTTTTCCTGTGAA

ATTCTGGCTGTCATGAAGTTGGCTTGTGCTGACATCTCAGGCAATGAGTTTATCATGCTC

GTGGCCACAACATTGTTCACATTGATGCCACTGCTCTTGATTGTCATCTCGTATTCACTA

ATCATTTCTAGCATCATCAAGATCAGCTCCTCTGAGGGGAGAAGCAAAGCCTTCTCCACC

TGTTCAGCCCACCTGACTGTAGTGATTATATTCTATGGGACTATTCTCTTCATGTACATG

AAGCCCAAATCTAAAGAGACACTTAATTCAAATGCCTTGGATGCTACAGACAAACTTATA

TCCATGTTGTATGGGGTGATGACTCCCATGTTGAATCCTTTAATATATAGTCTCAGAAAC

AAGGATGTGAAGGAGGCAGTAAGACTACTAAAGGAAAGGTTTATTAGCAAATGA

>LoafORs6.78

ATGGTTAAGACAAACTGTACAATAATTTCAAATTTTATTTTTCTGGGATTTACCCACTAC

CCCAAAGTTGAGATCTTCATATTTGTGCTGTGCCTGCTGATATACCTGATCACCTTGCTG

GGCAATATTATTCTGATCTCCGTCAGCATCCTGGACTCCCACTTGCACACCCCCATGTAC

TTTTTCCTCAGTAACCTCTCCTTTCTGGACATCTGGTACACCTCTTCTGCTCTCACTCCA

ATGGTGGCAAACTTCGTTGCAGGGGAAAACAGCATCTCATTCTCAGGATGTGCTGCTCAG

ATGTACTTCTCTCTTGCCATGGGCTCCACCGAGTGTGTGCTCCTGTCCATGATGGCGTAT

GACCGGTATGTAGCCATCTGCAACCCCCTGAGATATCCCATCATCATGAACAGGAGGGTT

TGTGCACACATTGCAGCTGGCTCCTGGGTGACGGGCTGCCTCACCGCCCTGGTGGAAACA

ATGTCTGTGCTACAGTTGTCTCTTTGTGGTAATAACACCATCAATCATTTCACTTGTGAA

ATTCTGGCTGTCTTGAAACTGGTTTATGTGGACACCTCCATGGCACAGTTAATCATGCTG

GTGATCAGCATACTACTTCTTCCCATGCCAATGCTCCTTATTTGTATCTCGTATGCCTTC

ATCCTCTCCAACATTCTGAGAATCAGCTCTGTGCATGGACGAAGCAAAGCCTTTTCAACA

TGTGCAGCCCACCTGACTGTGGTAGTTTTGTTCTATGGCACAGCTCTCTCCATGTACCTT

AAGCCTTCAGCTGTAGAGTCACAGGAAATAGATAAATTTATGGCTTTGGTATATGCTGGA

TTAACCCCCATGTTGAATCCTATCATCTATAGTCTACGGAACAAGGAGGTAAAAATGGCT

GTAAAAAAGTGTGCTTTCTTTATTCCCAGTTGCAAATAA

>LoafORs6.79

ATGGAATGGGAAAACCAAACCATTCTGGTGGAATTCTTTCTGAAGGGCCTTTCTGGTTAC

CCAAGGCTCGAGCTACTCTTTTTTGTTCTGATCTTAATAATGTATGTGTTCATTCTTCTG

GGCAATGGCACCCTTATTTTAATCAGCGTCTTGGACTCTCACCTTCACACACCCATGTAC

TTCTTCCTGGGGAATCTCTCCTTCCTAGACATCTGCTACACCACCACCTCCATTCCCTCC

ACACTGGTAAGTTTCCTCTCAGAGAGAAAGACCATTTCTTTTTCTGGCTGTGCAGTGCAG

ATGTTCCTTGGTTTGGCCATGGGGACGACAGAGTGTGTGCTCTTGGGCATGATGGCCTTT

GACCGCTATGTGGCCATATGCAACCCTCTAAGATATCCCATTATTATGAGCAAGAATTCC

TATGTGCCCATGGCATCTGGGTCCTGGTTTGCAGGGGTTATCAATTCTGCAGTACAAACT

ATGTTTGTGGTACAATTGCCTTTCTGCAGGAATAACATCATCAATCATTTTTCCTGTGAA

ATTCTGGCTGTCATGAAGTTGGCTTGTGCTGACATCTCAGGCAATGAGTTTATCATGCTC

GTGGCCACAACATTGTTAATATTGATGCCACTGCTCTTGATTGTCATCTCGTATTCACTA

ATCATTTCCAGCATTCTCAAGGTCCGTTCCTCTGAGGGGAGAAGCAAAGCCTTCTCCACC

TGTTCAGCCCACCTGACTGTAGTGATTATATTCTATGGGACTATTCTCTTCATGTACATG

AAGCCCAAATCTAAAGAGACACTTAATTCAAATGCCTTGGATGCTACAGACAAACTTATA

TCCATGTTCTATGGGGTGATGACTCCCATGTTGAATCCTTTAATATACAGTCTCAGAAAC

AAGGATGTGAAGGAGGCAGTAAAACTGCTACTAAAGAAAAGGTTCATTAACAAGCAAGTA

GAATAA

>LoafORs6.80

ATGGTTAAGACAAACTGTACAATAATTTCAAATTTTATTTTTCTGGGATTTACCCACTAC

TCCAAAGTTGAGATCATCATATTTGTGCTGTGGCTGCTGATGTTCCTGATCACCTTGCTG

GGCAATATTATTCTGATCTCCGTCAGCATCCTGGACTCCCACTTGCACACCCCCATGTAC

TTTTTCCTCAGTAACCTCTCCTTTCTGGACATCTGGTACACCTCTTCTGCTCTCACTCCA

ATGGTGGCAAACTTTGTTGCAGGGGAAAACAGCATCTCATTCTCAGGATGTGCTGCTCAG

ATGTACTTCTCTCTTGCCATGGGCTCCACCGAGTGTGTGCTCCTGTCCATGATGGCGTAT

GACCAGTATGTAGCCATCTGCAACCTCCTGAGATATCCCATCATCATGAACAGGAGGGTT

TGTGCACACATTGCAGCTGGCTCCTGGGTGACAGGCTGCCTCACCGCTCTGGTAGAAACA

ATGTCTGTGCTACAGTTGTCTCTCTGTAGTAATAACATCATCAATCATTTCACTTGTGAA

ATTCTGGCTGTCTTGAAATTAGTTTGTGTAGGTACCTCCATGGTAGAATTCCTTATGCTG

GTGATTAGCATACTACTCCTTCCTATGCCAGTGCTCCTCATTTGTATCTCGTATGCCTTC

ATCCTCTCCAACATTCTGAGAATCAGCTCAGTGGATGGACACAGCAAAGCCTTTTCAACA

TGTGCAGACCACCTGACTGTGGTAGTTTTGTTCTATGGGACAGCTCTCTCTGTATACCTG

AAGCCCTCAGCAGTAGATTCACAGGAGATAGATAAATTTATGGCTTTACTCTATATGGTT

TTGACCCCCATGTTGAATCCAATCATTTATAGTCTAAGGAATAAAGAGGTAAAAACAGCT

GTGAAAAGATTGTTGGTTAGAAACCCTCTTTGTGCTCTCTTTATTCCCAGCAGCAAATAA

>LoafORs6.81P

TGTGAAATACTAGCATTTGTCAAGCTGGCTTGTGAGGATATTTCCTTGAATGAGATTACT

ATAATGTTAGACAGTATAATATTTTTGTTTTCTCCATTACTTCTGATTTGTTTATCCTAC

TTTTTCATTTTCTCTACTGTACTGAGAATCAATTCTGCTGAAGGATGGAAAAAGGCTTTT

TCCATCTGCTCAGCCCACGTGACACTGGTGATTGTATTTTATGGAACAATCTTCTTCATG

TATATGAAGCCAAAGTCCAAAGACTCT

>LoafORs6.82

ATGAAAAGGAACAATGATTCCATGTTGACAGAATTTGTCTTGGTGGGGCTTTCTGCCCAC

CCAAAACTCCAGACAGTGTTCTTTGTGCTAGTTTTATGGATGTACCTGATGATTCTGCTG

GGAAATGGAGTCCTTATCTCAGTAATCATCTATGATTCTCACCTACACACCCCCATGTAT

TTCTTTCTCTGTAATCTTTCCTTCCTGGACATTTGCTATACAAGCTCCTCTGTCCCACTA

ATTCTTAACAGTTTCCTGACAGTAAGGAAAACCATTTCCTTCTCAGGGTGCATGGTGCAA

ATGCTTCTCTCCTTCGCCATGGGGGCCACGGAGTGTGTGCTCCTAGGTATGATGGCACTT

GACCGCTATGTTGCCATCTGCCACCCACTAAGATACCCTGTCATCATGAGCAAGGGTGCC

TATGTGCCCATGGCAGCTGGGTCCTGGGTTGCTGGGCTTGCTGACTCAGTGGTGCAGACA

TCTCTTGCAGTGCAGTTACCATTCTGTACTAATAATGTCATTAGCCATTTTGTCTGTGAA

ATTTTGGCTATCCTGAAACTGGCCTGTGCTGATATTTCAATCAATGTGATCAGCATGGCC

GGGTCAAATCTAATTGTTCTGGTTATCCCATTGCTAGTAATTTCCACCTCTTATATTTTT

ATTGTTGCCACCATTTTGAGGATCCCTTCCACTGAAGGAAAATGTAAGGCCTTCTCCACC

TGTTCAGCCCATCTGACGGTGGTGATTATATTCTATGGAACCATCTTCTTCATGTACGCA

AAACCCAAGTCTAAAAACTCTGTTGCTACAGATAATCAAGACATCATTGAGGCGCTCATC

TCCCTCTTCTATGGAGTGATGACCCCCATGCTCAATCCTCTCATCTACAGTCTGAGAAAC

AAGGATGTAAAGGCTGCTCTGAAGAACATGCTGGGTAGAAAACACTTCTCTGATAGAATA

TAA

>LoafORs6.83

ATGGGTAAGTTTAACCAGACATTTGTGAGAGAATTCGTTCTTCTGGGTCTTTCTGGGTAC

CCAAAACTTGAAATCATTTACTTTGTTCTAATTCTAGTGATGTATCTAATGATTCTAATT

GGCAATAGTGTTCTCATCATAGCAAGCATCTTTGATTCCCATCTTCATACCCCCATGTAC

TTCTTCCTGGGCAACCTCTCTTTCCTGGATATCTGCTACACATCCTCCTCTGTTCCCTCA

ACATTGGTGAGCTTAATCTCAAAGAAAAGAAACATTTCCTTCCCTGGATGTGCAGTGCAG

ATGTTCATTGGGTTTGCAATGGGATCAACAGAGTGTTTGCTCCTCGGCATGATGGCTTTT

GATCGCTACGTGGCCATCTGTAACCCTCTGAGATACTCCGTCATCATGCACAAGTTGGTG

TATGTGCTGATGGCTTCTGTGTCATGGCTTTCTGGTGGAATCAACTCAATTGTGCAGTCA

GCTCTTGCCATGCAATTGCCATTCTGTGGGAAAAATATTATCAATCATTTCACATGTGAA

ATATTAGCTGTTCTCAAGCTCGCTTGTGCTGATATATCCCTTAACATTATCACCATGGTG

GTATCAAATATAGCCTTCCTGGTTCTTCCACTGCTGGTTATTTTCTTTTCCTACATGTTC

ATCCTTTGCACCATCTTGAGGATGAACTCAGCCACAGGGAGACGCAAGGCCTTCTCCACC

TGCTCAGCACACCTGACTGTAGTGATCATATTTTATGGTACCATCTTCTTTATGTATGCA

AAGCCCAAGTCCCAAGACTTGCTTGAAGAGGACAAGCTGCAAGCATTAGACAAACTCATT

TCCCTGTTTTATGGGGTAGTAACCCCCATGCTGAATCCTATAATCTATAGCTTGAGGAAT

AAGGATGTAAAAGCTGCCGTGAAATATCTGCTGAACCACAAACCTGTTTAA

>LoafORs6.84

ATGGATAAGATTAACCAGACATTTGTGAGAGATTTCATTCTTCTGGGACTCTCTGGTTAC

CCCAAGCTCGAGATTATCTTCTTTGCACTGATTCTAGTGATGTATCTAGTGATTCTAATT

GGCAACGGTGTTCTCATCATAGCAAGCATCTTTGACTCCCATCTTCACACCCCCATGTAC

TTCTTCCTGGGCAACCTCTCTTTCCTGGATATCTGCTACACAGCCTCCTCTGTTCCCTCA

ACATTGGAGAGCTTAATCTCAAAGAAAAGAAACATTTCCTTCTCTGGATGTGCAGTGCAG

ATGTTCCTTGGGTTTGCAATGGGGTCAACAGAGTGCTTCCTCCTTGGCATGATGGCTTTT

GATCGCTACGTGGCCATCTGTAACCCTCTGAGATACCCCGTCATTATGAGTAAGTTTGTG

TATGTGCTGATGGCTTCTGTGTCATGGCTTTCTGGTGGAATCAACTCAATTGTGCAAACA

GCTCTTGCCATGCGTTTGCCTTTCTGTGGAAATAACATTATTGATCATTTCTTATGTGAG

ATATTAGCTGTCCTAAAATTAGCTTGTGTTGATATATCTCTCAACATTACTATGCTAGCA

GTATCAAATATGGCCTTCCTAGTTCTTCCACTTCTGGTCATTTTTTTCTCCTACATGCTC

ATCCTCTACACCATCTTGAGAATGAACTCAGCCACAGGAAGACGAAAGGCCTTTTCTACC

TGCTCAGCGCATCTGACTGTGGTGATCATATTTTATGGTACCATCTTCTCTATGTATGCA

AAACCCAAGTCCCAAGACATGGTTGGAAAAAATGAGATGCAAGCTTCAGAGGGCCTTATT

TCAATGTTTTATGGGGTAGTGACCCCCATGCTGAATCCTATAATTTACAGCTTGAGAAAT

AAGGATGTAAAAGCTGCTGTGAAATATTTGTTGGGTCAAAAAGCTCTAAACAAATAA

>LoafORs6.85P

ATCTGTAACAGGTTTTTCTTCCTGGGATTTACCCACTACCCCAAAGCTAAGATCATCATA

TTTGTGCTGTCCCTGTTGATATACCTGATCACCTTGCCGGGCAATATTATTCTGATCTCC

GTCAGCATCCTGGATTCCCACTTACACAGCCCCATGTATTTTTTCCTCAGCAGCCTCTCC

TTTCTGGACATCTGGTACACCTCTTCTGCTCTCACTCCAGTGGTGGCAAGATTTGTTACA

GGGAAAAACAGCACCTCATTCTCAGGATGTACTGCTCAGGTATACTTTTCCCTTGTCGTG

GGCTCCACCAAGTGTGTGCTCCTGTCCATGATGGCGTATGACCGGTATGTAGCCATCTGC

AACCCCCTGAGATATCCCATCATCATGAACAGGAGGGTTTTTGCACACATTGCAGCA

>LoafORs6.86

ATGGTAGGATTCAATCAGACCTCATCTATGATAGGTTTCATTCTCCTGGGACTCTCTGCC

CACCCAAAACTAGAGAAAACCTTCTTTGTGCTCATCCTGATGATGTACTTGGTGATCCTA

CTGGGAAATGGTGTCCTCATCCTGGTGACCATGCTTGACTGCCGCCTACACACGCCCATG

TATTTCTTCCTGGGGAACCTCTCCTTCCTGGACATCTGCTACACAACTGCTGCAGTCCCC

CTCATTCTTGAGAGTTTTCTCGCTCCCAGGAAAGCCATCTCTTTTTCAGCCTGTTTTGGG

CAGATGTTTCTCTCCTTTGCCATGGGAGCCACAGAGTGTGTACTCCTGAGCATGATGGCA

TTTGATCGATATGTGGCCATCTGCAAACCCCTTAGATACCCTGTGGTCATGAGCAAGGCT

GCCTATGTGCCTATGGCTTCTGGTTCATGGGCAGCTGGTATCATCAACTCTGTAGTACAG

ACTGTTCAGGCAATGCGGCTGCCCTTCTGTGGGGACAATGTTATCAACCACTTTACCTGT

GAGATCCTGGCTGTCCTGAGGTTGGCCTGTGCTGACATCTCCATCAATGTGATCAGCATG

GTTGTGGCCAACATGATCTTCCTTGCAATCCCAGTTCTCTTCATTTTTGTCTCGTATGTC

TTTATCCTTGCCACTATCCTGAGGATCCCCTCAGCAGAGGGGAAGAAAAAGTCATTCTCC

ACCTGCTCTGCCCACCTCACAGTTGTAGTTGTTTTCTATGGGACCATCCTCTTCATGTAT

GGGAAGCCCAAGTCTAAGGACCCACTGGGGACAGACAAGCAGGACGTTTCAGACAAGCTC

ATCTCCCTCTTCTATGGGGTGGTGACCCCCATGCTCAACCCCATCATCTACAGCCTGAGA

AACAAGGATGTGAAGGCTGCTCTGAGGAACCTGGTGGCTCAAAAACACTTTAACTGA

>LoafORs6.87P

ATGGAATCTCCCAACCAGTCTGCTGTGACAGAGTTTGTCTTGCTGGGACTCTCAGCCCAC

CCAAAGCTGGAGAAAACCTTCTTTGTGCTCATCCTGCTGATGTACTCCGTGATCCTACCG

GGCAATGGGGTCCTCATCCTGGTGACTGTGTCTGACTCCCGCCTGCACACACCCATGTAC

TTCTTCCTGGGGAACCTCTCCTTCTTGGACATCTGCTACACAAACTCCTCAGTTCCCCTA

GTCTTGGATGGTTTCCTGACCCCAAGGGAAACTATTTCTTTCTCAGGCTGTGCTGTGCAG

ATGTTTCTCTCTTTTGCA

>LoafORs6.88

ATGGAAGTGACCAACCAGTCTGCTGTGACAGAGTTTGTCTTGCTGGGGCTGTCAGATCAG

CCAACGCTTGAGAAAACTTTCTTTGTGCTCATCTCATTGATGTACCTGGTGATCCTATTA

GGGAATGGGGTTCTCATCCTGGTGACTGTGTTTGACTTCCACCTGCACACACCCATGTAT

TTCTTCCTGGGGAACCTCTCCTTTCTGGACATCTGCTACACGACCTCTTCCATCCCTCTA

GTCCTTGATGGTTTCCTGACTCCCAGGAAAACCATCTTTTTCTCAGGCTGTGCTGTGCAG

ATGTTTCTCTCTTTTGCCATGGGAGCTACAGAATGTGTGCTTCTGGGCATGATGGCGTTT

GATCGCTACGTGGCCATCTGCAACCCCCTTAGGTACTCTGTGATCATGAGCAAGGCTGGC

TATGTGCCCATGGCTGCTGGCTCCTGGGTAGCTGGTGGAACAAACTCTTTGGTGCAGACT

TCTCTTGCAGTACAATTACCCTTCTGTGGGGACAATGTCATCAATCACTTCACCTGTGAG

ATCCTGGCCGTTCTAAAGTTGGCCTGTGCTGACATCTCCATTAACGTGATCAGCATGGAG

GTGGCCAATGTGATCTTCCTGGGGGTTCCAGTACTGTTCATCTTTGTCTCCTACATCTTC

ATACTCACCACCATCCTAAGAATCCCCTCAGCTGAGGGGAGGCGAAAGACCTTCTCTACC

TGCTCTGCCCACCTCACTGTGGTGGTCATTTTCTATGGGACTATTCTTTTTATGTATGCA

AAGCCCAAATCAAAGGACCCTCTGGAAGCAGACAAGCAGGATGTTTCAGACAAGCTCATC

TCCCTTTTCTATGGGGTGCTGACTCCCATGCTCAACCCCATTATCTACAGCCTCAGAAAC

AAAGATGTCAAAGTGGCTGTGAAGAAACTATTAAGTCAGAAATGCTTCACCCAGTGA

>LoafORs6.89

ATGGAAAGTGCTAATCAGACCTCATCTGTGACAGAGTTTGTTCTCCTGGGACTCTCAGCT

CACCCAAAGCTGGAGAAAATGTTCTTTGTGCTCATCCTCCTGATGTATCTGGTGATCCTG

CTGGGCAATGGGGTCCTCATCCTGGTGACTGTGTCTGTCCCCCGCCTGCACACGCCCATG

TACTTCTTCCTGGGGAACCTCTCCTTCCTGGACATCTGCTACACAACCTCCTCAGTCCCC

CTTATTCTTGACAGCTTCCTCACTCCCAGGAAAACCATCCCCTTCTCAGCCTGTGCTGTG

CAGATGTTTCTCTCCTTTGCCATGGGAGCCACAGAGTGTGTGCTTCTGGGCATGATGGCA

TTTGATCGCTATTTGGCTATCTGCAACCCCCTTAGATACCCTGTCATTATGAGCAAGGTG

GTCTATGTGCCCATGGCTGCCAACTGCTGGGCAGCTGGAAGTGGTGCCTCCATTGTTCAA

ACCTCTCTGGCAATGAGGCTGCCCTTCTGTGGGAACAACATCATCAACCACTTCACCTGT

GAAATCCTGGCTGTCCTGAAGTTAGCCTGTGCTGACATCTCCATTAACGTGATAAGCATG

GGAGTGACAAATGTGATCTTCCTGGGAGTCCCAGTACTGTTTATCTTTGTCTCCTACATC

TTCATACTCACCACCATCCTGAGGATCCCCTCAGCAGAGGGAAGGAAAAAGGCCTTCTCT

ACCTGCTCTGCCCACCTCACAGTTGTGGTTGTCTTCTATGGGACCATCCTCTTCATGTAT

GGGAAGCCCAAGTCTACGGACCCACTGGGGACAGACAAGCAGGACGTTTCAGACAAGCTC

ATCTCCCTCTTCTATGGGGTGGTGACCCCCATGCTCAACCCCATCATCTACAGCCTGAGA

AACAAGGATGTGAAGGCCACTGTGAGGAATCTGGTATTTCAGAAACACTTCACCCAGTAA

>LoafORs6.90

ATGGTCAAGTCCAATCAGACCTCACCTGTGGTAGGGTTCATTCTCCTGGGACTCTCTGCC

CACCCATTGCTAGAGAAAATTTTCTTTGTACTCATCTTCCTGATGTATCTGGTGATCCTG

CTGGGCAACAGGGTCCTCACTCTTGTGACCATCCTGGACTTCCGCCTGCACGCGCCCATG

TACTTCTTCCTGGGGAACCTCTCATTCTTGGACATCTGCTACACAACCTCTTCAGTCCCC

CTTATTCTTGACAGCTTCCTCACTCCCAGGAAAACCATCCCCTTCTTAGCCTGTGCTGTA

CAGATGTTTCTCTCCTTTGCCATGGGAGCCACAGAGTGTGTGCTCCTGAGCATGATGGCA

TTTGATCGTTATGTGGCCATTTGCAACCCCCTTAGGTACCCTGAGATCATGAGAAAGGCT

GCTTATATGCCCATGGTTGCCAGCTCCTGGGTAGCTGGAAGCACCACCGCTATGATACAG

ACTTCCCTGGCAATGCGACTGCCTTTCTGTGGGGACAATGTCATCAACCACTTTGCCTGT

GAGATCCTGGCTGTCCTGAAGTTGGCCTGTGCTGGCATCTCCATTAATGTGATCAGTATG

GGAGTGGCCAATGTGATTATTCTGGGAATCCCAGTGCTGTTCATTTTTTCCTCCTATGTG

TTCATCATTGCTACCATCTTAAGGATCCGTTCAGCAGAGGGGAGGAAAAAGGCCTTCTCT

ACCTGCTCTGCCCACCTTACAGTTGTGGTTGTCTTCTATGGGACCATCCTCTTTATGTAC

GCAAAGCCCAAGTCTAAGGGTCCACTGGGGGCAGACAAACAGGACCTTTCAGACAAACTC

TTCTCCCTCTTCTATGGGGTGGTGATACCCATGCTCAACCCCATCATCTACAGCCTGAGG

AACAAGGATGTGAAGGCCGCTGTGAGGAATCTGGTATTTCAGAAACACCTCATCCGGTGA

>LoafORs6.91P

ATGGAAAAAGTCAATTGGACCTCCCCAGTGATAGAGTTCATTCTCCTGGGACTATCTGAC

TACCCAAAGCTGGAGAAGATTTTCTTTGTGCTGGTCCTGCTGATGTACCTGGTGATCCTA

CTGGGCAATGGGGTCCTCATCCTGGTGACCATCCTTGACTCCCACCTGGGCACGCCCATG

TACTTCTTCCTGGGGAACCTCTCCTTCCTGAATATCTGCTGCATAACCTAATCTGTTCCT

CTGGTCCTGGACAGCTTCCTGACACCCCGGGAAACCATCTCCGTCTCAGCCTGTGCAGAG

CAGATGGCTCTTTCCTTTGCCATGGCAGGAACAGAGTACCTATTTCTCAGCATGATGGCG

TTTGACCACTTTGTGGCCATCTGCAACTCTCTTAGGTACCCTGTGATCATGAGCAAGGTA

TCTATGTGCCTATGGCTGCCAGCT/CTAAAGTTAGCCTGTGCTGATATTTCCATCAATGT

GATCAGCATGGGAGTGACAAATGTGATCTTCCTGGGGGTCCCAGTTCTGTTTATCTCTCT

CTTCTGTGTGTTCATCATTGCAACCATCCTGAGGATACCCTCTGCAGAGGGAAAGAAAAA

GGCCTTCTCTACCTGCTCTGTGGTGGTCTTCTTCTATGGGACCTTATTTTTTATTTACAG

GAAGCCCAAGTCTAAGGACCTGCTGGGGGCAGACAAACAGGACTTTTCAGACAAGCTCAT

CTCCCTCTTCTGTGGGGTGGTGACCCCCATGCTCAACCCCATCATCTATAGTCTAAGGAA

CAAGGATGTGAAGGCTGCTGCAAAGAACCTGGTGGCT

>LoafORs6.92

ATGGAGGCGCTCAATAGGACAGGGGTCTCTGAGTTCTTTCTGAAAGGATTTTCTGCCTAC

CCGGCCCTGGAGCACCTGCTCTTCCCGCTGTGCTCAGCCATGTACCTAGTGACCCTGCTG

GGGAACACAGCCATCGTGGCAGTGAGCGTGCTGAACGTCCGCCTGCACACGCCCATGTAC

TTCTTCCTGGGCAACCTCTCCATCCTGGACATCTGCTACACATCCTCATTTGCACCCCTG

ATGCTGGTCCACTTCCTCTTGGCCCAGAAGACCATCTCTTTCACTGGCTGTGCAGTCCAG

ATGTGTCTGAGCTTGTCCACGGGCTCCACAGAGTGTCTGCTGCTTGCCGTCATGGCCTAC

GATCGCTACCTAGCCATTTGCCGGCCACTCCAGTACCCCGTGCTCATGAGCCGCCAGCTT

TGCCTGTTGCTGGTGGGAGCCTCCTGGGCCTTCTCCCTCCTCAAGTCAGTGACTGAGACA

GTCATTGCCATGAGGCTGCCCTTTTGTGGTCACCGCGTGGTCAGCCACTTCACCTGTGAG

ATCCTGGCAGTTCTGAAGCTGGCATGTGGTGACACGTCGGTCAGTGAGGGCTTCTTGCTG

GCCGGCAGCATTTTGCTGCTACCCCTACCCCTGGCACTCATCTGCCTCTCCTATGCTCTT

ATCCTGGTCACCATTCTGAGAGTGCCCTCAGCTGCCGGGTGCCACAAAGCTTTTTCCACC

TGCTCAGCGCATCTGGCTGTGGTGGTGCTCTTCTATGGTGCTATCATCTGCATGTACATG

AAGCCCAAGAGCAAGGAGGCCCACATCTCTGACGAGGTCTTCACAGTCCTCTACGCTGTG

GTCACGCCCATGCTGAACCCTGTCATCTACAGCCTGAGGAACAAGGAGGTAAAGGAGGCT

GCAAGGAAGCTGTGGGGCAGGATTTGGACCTCCAGGTGA

>LoafORs6.93

ATGATGGATGGGGCAAACCAGACAGCTATCAGGGAGTATATCCTGCTGGGGTTATCTGAG

CACCATAACCTAGAGATGGTCCTGTTTGTCCTTTGCCTGGGCATCTACTGTGTGGATGTG

ATGGGGAACTCCCTCCTCATAGCGCTGAACATGCTGGACCCTCACCTGCACAACCCCATG

TACTTCTTCCTCAGCAACCTCTCCCTCATGGGCATCCTTGGTATATCCTCCTTTGTGCCA

CTCACGCTGGTCAACTTCCTGGAAGCCCGAAGGACCATCTCCTTCCCTGGCTGTGCCCTA

CAAATGTACCTGACCCTGGCACTGGGCTCCACAGAGTGCCTGCTCCTTGCCGTGATGGCA

TATGACCGTTATGTGGCTATCTGCCAGCCACTTAGGTATTCAGAGCTCATGAGTGGGCAG

CTTTGCATGTGGATGGCAGTGCTGAGCTGGGGGATAGGCTTCACCAACTCACTGCTGCAG

TCCATCCTGGCCTGGCACCTCTCCTTTTGTGGCCACAATGTCATTAACCACTTCTTCTGT

GAGATCTTGGCAGTGATAAAACTGGCCTGTGGGGACATCTCCCTAAATGCATTGGCATTA

ATGGTGGCCACAGCTGTCCTAACGCTGACCCCATTCCTGCTCATGTTTCTCTCCTACATT

TTCATCCTTGCTGCCATCCTTAGGGTACCTTCTGCTGCAGGCTGGAGCAAGGCTTTTTCT

ACCTGCTCTTCTCACCTAATAGTGGTGGTGATTTTCTATGGAACTATCTCCTTCATGTAC

TTGAAGCCCAAAGCCAAGGACCCTGACTTAGATAAGATTATTACATTGTTCTATGGGGAC

ATGACACCCTCACTGAACCCTACCATCTACAGCCTGAGGAATACAGAGGTGAAAGCCACT

GTAATAGCTCTGCTGCGGGAAGATCTGCTGTCCAGGAAAATGTCCCACTTTTGCTGCTGC

ACTCCATCTTTATCAGTCAGGATAGGTTAG

>LoafORs10.1P

TTCCTCATTATAGCTGTGATGTCTCTGGATTGCTACGTGGCCATTTGCAGATCTCTGCAC

TACCCAACCATCATGAACAAGAGGACTTGTTTCCTCCTGGTCACTGTTTGCTTTGCGCTG

GGCTTCACTCTCATCTCTGGCCCGGTGGTGAAAGTTTCTCAATTATCCTTCTGTGGCCCC

AATGCCATCCCCCACTTCTTTTGTGACCTTGGCCCTCTGATCCTTCTCTCCTGTTCTGAC

ACCAAATTTCTTGAAACACTGGCTTTCATCCTGGCTTTGTTTATCATTTTGACATCCGTT

ATTATAACCCTC/AAAGCTTTCTCCACCTGCTCATCTCACCTCATCGTCCCCTCTCTATT

GTATGGCAGCTGTGTCTTTATGTATGGGAAACCAAAACAAACCAATAGGCTGTACTCCAA

CAGAGAGGCTGCTCTTGCGAACACTGTGGTGTCCCCACTACTGAACCCTATCATCTACAC

ACTGAGGAACAAGCAGGTCCATCAGGCCCTGAAAGAGACTATGTGTAGAATGAAAATAGC

AAGA

>LoafORs10.2

ATGAGTAATCAGACACAGGTAACAGAGTTTATCCTGCAGGGCTTCTCAGAGCACCCAGAA

TACCGGCTGCTCTTATTTGGCTGTTTTCTCTCCCTCTTCTCTGTGGCCCTCACAGGTAAT

GTCCTCATCATCTTGGCCATCACCTTCAACCTGGGGCTCCACACACCCATGTATTTTTTC

TTGTTCAACTTGGCTACTATGGACATTATCTGCACCTCCACCATTATGCCCAAAGCACTG

GAAGGCCTTGTGTCTGAGGAGAGCTCAATCTCCTATGGGGGCTGCATGACCCAGCTCTAT

TTCCTCACATGGTCTGCATCCTCTGAGCTCCTACTGCTTACGGTCATGGCCTATGACCGG

TATGCAGCCATCTGCCACTCCCTGCGCTACAGCACCATAATGAGCAAGGCATTCTGCAGC

ATGCTGGCTGCAGGTGTGTGGGGGCTCTGTGCCTTCAACACAGCCATTCACACTGGGCTG

ATGCTGCTCTTGAATTTCTGTGGCCCCAATGTGATTACCCATTTCTTCTGTGAGGTCCCT

CCTCTGCTGCTTCTCTCCTGTAGCTCCACCTATGTAAACAGTGTCATGATTGTCCTGGCC

GATGCCTTTTATGGCATCTTGAATTTCCTGATGACCATTGTGTCATATGGCTTCATCATC

TCCAGCATCTTAAAGATGAGGACCAAGGAAGGGAAGAAAAAAGCTTTCTCCACCTGCTCT

TCCCATCTTATTGTGGTCTGCATGTACTACACTGCTGTCTTCTATGCTTACATAAGCCCA

GTCTCCAGCTACAGTGTGGAGAAGAGCAAGTTGGCTGGTGTGCTGTACACAATGCTGAGC

CCTACCCTCAACCCCCTCATCTATACTTTGAGAAACAAGGAGGTCAAAGCAGCCCTCAGG

AAGATTTTCCCCTTCTGCAGAAACTAG

>LoafORs11.1

ATGTTTTGTCACTGTTTCCAGGAAAGCAGAGGCGTGGTGATCCCATCTTGGGAAAACCAA

ACAACCATAGCAGAATTTGTGCTTCGAGGATTCACTTCCATCCGACAGCTTAATATTTCC

CTCTTTATGATGTTTTTAGTTTTTTACACTATAACTGTCTCTGGAAACATTCTCATTGGC

CTGTTAGTTTTGTTCAGCCATCACCTCCACACACCCATGCACTTCTTCTTGGTGAACCTG

TCCTTTCTGGAGATCTGGTATACCTCCAACATTGTCCCCAAGATGTTGCTGATTATTATA

GCTGAACAGAAGACTATCTCTGTTCCTGGCTGCCTGGCACAGTTCTACTTCTTTGGATCC

CTGGCTGCAACAGAGTGCCTTTTGCTGGCAGTAATGTCTTATGACCGTTACCTGGCCATC

TGCCAACCTCTCCGCTATCCCATCCTCATGACTGGCCCCCTCTGTATCAAGTTGGCTGCC

AGTTCTTGGCTATGCTGTTTCCTCCTCACAGCAATCACAATGGTCCTACTGTCTAGACTG

ACCTTTTGTGGACCTAATGAAATCGATCACTTCTTTTGTGACTTCACCCCTCTGGTCCGT

CTCTCTTGCGGGGACACCTCACGCACTGAGACAATTGCCTTTGCCACCTCTTCTGCAGTC

ACTCTGGTCCCATTTCTCCTCATCACAGCCTCCTATTCTTGTATCCTTGCTGCTATCCTA

AGAATTCCATCTGGCACAGGCCAGCGAAAGGCGTTCTCCGCCTGCTCCTCCCACCTCACT

GTGGTCACAGTGTTTTATGGGACACTGATTGCCGTGTATCTGGTACCCTCAGCCAACTCT

TCACAACTCTTGGGCAAAGGGTTCTCTCTACTCTATACCATCCTGACACCCATGTTCAAC

CCAATCATTTACAGTCTGAGAAATAGAGATATCCACGAAGCTCTGAAGAGGAACTTGAGT

AAGAAATCGGGTTTCCTCAAATGA

>LoafORs12.1P

AATTTGGGGATGATCACCCTCATTTGGATGGGTTCCCGACTCCACACCCCCACGTACTTT

TCCCTCAGCCACTTGTCCTTTGTGAATGTCTGCTCCTCCTCTGCCATTGGTCCCAAGATG

CTGACTGATATCTTTGTGGAGAAAAAAGTAATTTCTTTCTTTGGTTGTGCTGCCCAAGAT

GTTTTTTGATCAGTTTGTACTGAGTGTTTCCTCTTGGCTTCCATGGTGTACGATCAGTAT

ATGGCCATTTGTAAGCCCTTGTTGTACATGCTCATTATGTCCCAAAGGGTCTGTGTGCAG

CTGGTGGTGGGACCTTATGCTGTGGGTCTTAAAAGCACCATGACCCAGACAACTTTTACT

TTC/TTTTACTTTCACCTCCCACGCCGTGGTTCAAATACCATCAATCACTTCTTCCGCAA

CCTTCTTCCTGTTCTCTCCCTGGCACGTGCAGACAACCAGGTCAATACAAATTCACTTTT

CATCTTGGCTGGAGCGCTAGGAGTACTCAGTGGTGTGATCACCTTGGTCTCCTATATTTA

CATCATCATGGCCATCCTGAAGATCGGCTCTGCTGGTGGAAGGCGAGAG

>LoafORs13.1

ATGGAGACAAACGAGACTCTGGTGACAGAGTTTGTTCTCACAGGACTTACAGATAATCCC

TTGCTGCAGGTCCCCCTGTTCCTGGTGTTCTTGGTGATCTACCTTGTCACCATGGGGGGG

AACCTTGGACTGATAGCTCTCATCTGGAAGGACCCCCATCTTCACACACCCATGTACTTA

CTCCTTGGTGGTTTAGCCTTTGCAGATGCTTGTACTTCATCCTCTGTGACTCCCAGGATG

CTTGTCAATATCTTAGACAAGAGTCAGATGATATCCCTCTTTGAGTGCATGGCCCAATAT

TATTTTTTTGGTTTCAGTGCAACCACAGAATGTTTCCTCCTGGTAGCGATGGCCTATGAC

CGCTATGTCGCCATATGCAACCCCTTGCTGTATCCAGTGGTGATGTCCAACAGGCTGTGC

ACTTGGTTAATAAGTATTTCTTATGTAATTGGTTTTCTGCATCCCATAATTCATGTAGGG

TTATTATTTAGATTAACCTTCTGCCAGACCAATCTAATACATCATTTCTACTGTGAAATC

TTGCCACTATATACAATTTCTTGCACTGACCCATCTATTAATGCATTAGTGGTTTTCATT

TTTGCTGCTTTTATACAAGCTTTTACTTTTATGACCATTGTAGTCTCTTATACCCGTGTC

CTCTTTGCTATCCTGAAAAAGAAGTCTGAAAAGGGCAGAAGGAAAGCCTTTTCCACGTGT

AGTGCCCATCTGCTCTCTGTCTCTTTGTTCTATGGCACTCTCTTCTTCATGTATGTGCGT

CCTGGGTCTGGCCCAGATAAATATCAGGATAAGATGTATTCACTGTTTTACACAATAATA

ATTCCCCTGCTAAACCCCTTTATTTACAGCCTAAGAAACAAGGAAGTTTTAGCTGCACTG

AGAAAAGTCATAAAGAAATAA

>LoafORs13.2

ATGGCAGAAGAAAATGAGACCCTGTTGGCAGAGTTTGTGCTCATGCGGCTTACAGGTCAT

CCAGAGCTGCAGGTCCCCCTGTTCCTGGTATTCTTGGTGATCTACCTCACCACCATGGTG

GGAAACCTTGGACTGATTGGCCTCATCTGCAAGGACCCCCATCTTCACACTCCCATGTAC

TTATTCCTTGGCAGTTTAGCCTTTGCTGATGCTTGTACTTCATCCAGTGTGACTCCTAAG

ATGCTTATGAATTTTTTATCCAAGTATCACGTGATTTCCATTTCTGACTGTATGGCCCAA

TTTTATTTTTTTGGTTCCAGTGCAACCACAGAATGTTTCCTCCTGGTAGTGATGGCCTAT

GACCGCTATGTCGCCATATGCAACCCCTTGCTTTATCCGGTGGTGATGTCCAATAGCCTC

TGTACTCAACTGATAGGTGTTTCATATGCTATTGGTTTTGTGCATTCCGTGGTTCATGTG

ACTTTGTTATTTAGATTAACTTTCTGCAGATTCAATATAATACAGGATTTCTACTGCGAA

ATTTTACAACTGTTCAAAATCTCTTGCACTGATCCTACAGTTAATGTAATCCTGGTTTTA

ATTTCTTCAGCCTTTATCCAAGTCTTAACTTTTATGACCATCATAATTTCTTATACCTGT

GTCCTCTTTGCCATCCTGAACAAGAAGCCTGAAAAAGGCAGAAGCAAAGCCTTCTCCACG

TGCAGTGCCCATCTGCTCTCTGTCTCTTTGTTCTATGGCACTCTCTTCTTCATGTATGTG

CGTCCCGGGTCTGGCCCAGCTGAAAATCAAGACAAAATGTATTCTTTATTTTACACAACA

ATAATTCCCCTACTAAATCCTTTTATTTACAGCCTGAGAAACAAAGAGGTTTCTGGTACC

TTGAGAAGAATAATGAAGAAATAA

>LoafORs13.3

ATGACAGAAGAAAATGAGACTCTGGTGGCAGAGTTTGTGCTCATGGGACTTACAGGTCAT

CCAGAGCTGCAGGTCCCCCTGTTCCTGGGGTTCTTGGTGATCTACCTCACCACCATGGTG

GGAAACCTTGGACTGATTGGCCTCATCTGCAAGGACCCCCATCTTCACACTCCCATGTAC

TTATTCCTTGGCAGTTTAGCCTTTGCTGATGCTTGTACTTCATCCAGTGTGACTCCTAAG

ATGCTTATGAATTTTTTATCCAAGAATCACATGATTTCCATTTCTGACTGTATGGCCCAA

TTTTATTTTTTTGGTTCCAGCGCAACCACAGAATGTTTCCTCCTGGTAGTGATGGCCTAT

GACCGCTATGTCACTATATGCAACCCCTTGCTTTATCCGGTGGTGATGTCCAATCAACTC

TGTATGCAACTCATAGGTGTTTCATATGCTATTGGTTTTGTGCATTCCGTGATTCATGTG

ACTTTGCTATTTAGATTAACTTTCTGCAGATCGAATATAATACAATATTTCTACTGTGAA

ATTTTACAACTGTTCAAAATTTCTTGCACTGATCCTGCAATTAATACATTCCTGGTTTTA

ATTTTTTCAGCCTTTATACAAGTCATTACTTTCACGGCCACCATAGTCTCCTATACCTGT

GTCCTCTTTGCCATCCTGAAAAAGAAGCCTGAAAAAGGCAGAAGCAAAACCTTCTCCACG

TGCAGTGCCCATCTGCTCTCTGTCTCTTTGTTCTGTGGCACTCTCTTCTTCATGTATGTG

CATCCCGGGTCTGGCCCAGCTGAAAATCAAGATAAAATGTATTCTTTATTTTACACGATA

ATGATTCCCTTTCTAAATCCTTTTATTTACAGCCTGAGAAACAAAGAGGTTATAGATGCC

TTGAGAAGAATAATGGAGAAATAA

>LoafORs13.4

ATGGAGACAAACAAGACTCTGGTGACAGAGTTTGTTCTCACAGGACTCACAGATAATCCC

TCGCTGCAGGTCCCCCTGTTCCTGGTGTTCTTGGTGATCTACCTTGTCACCATGGAGGGG

AACCTTGGACTGATCGCTCTCATCTGGAAGGACCCCCATCTTCACACACCCATGTACTTA

CTCCTTGGTGGTTTAGCCTTTGCAGATGCTTGTACTTCATCCTCTGTGACTCCCAGGATG

CTTGTCAATATCTTAGACAAGAGTCAAATGATATCCCTCTTTGAATGCATGGCCCAATAT

TATTTTTTTGGTTCTAGTGCAACCACAGAATGTTTCCTCCTGGTAGCGATGGCCTATGAC

CGCTATGTCGCCATATGCAACCCCTTGCTGTATCCAGTGGTGATGTCCAACAGACTGTGC

ACTGGGTTAATAAGTATTTCATACGTAATTGGTTTTCTGCATCCCATAATTCATGTAGGA

TTATTATTTAGATTAACCTTCTGTAGGTCCAATATAATACATCATTTCTACTGTGAAATC

TTGCCACTATATACAATTTCTTGCACTGACCCATCCATTAATGCATTGGTGGTTTTTGTT

TTTTCTGCTTTTACACAAGCTTTTACTTTTATGATCATCATAGTCTCTTATACCCGTGTC

CTCTTTGCTATCCTGAAAAAGAAGTCTGAAAAGGGCAGAAGCAAAGCCTTCTCCACATGC

AGTGCCCATCTGCTCTCTGTCTCTTTGTTCTACGGCACTCTCTTCTTGATGTATGTGCTT

CCTGGGTCTGGCCCAGATAAATACAAGGACAAGATGTATTCACTGTTTTACACAATTATA

ATTCCCCTGTTAAACCCCTTTATTTACAGCCTAAGAAACAAGGAAGTTTTAGCTGCACTG

AGAAAAGTCATAAAGTAA

>LoafORs13.5

ATGACAGAAGAAAATGAGACTCTGGTGGCAGAGTTTGTGCTCATGGGACTTACAGGTCAT

CCAGAGCTGCAGATCCCCCTGTTCCTGGGGTTCTTGATGATCTACCTCACCACCATGGTG

GGAAACCTTGGACTGATTGGCCTCATCTGCAAGGACCCCCATCTTCACACTCCCATGTAC

TTATTCCTTGGCAGTTTAGCTTTTGCTGATGCTTGCACTTCATCCAGTGTGACTCCTAAG

ATGCTTATGAATTTTTTATCCAAGAATCACGTGATTTCCATTTTTGACTGTATGGTCCAG

TTATATTTTTTTGGTTCCAGTGCAACCACAGAATGTTTCCTCCTGGTAGTGATGGCCTAT

GACCGCTATGTCGCCATATGCAACCCCTTGCTTTATCCAGTGGTGATGTCCAAAAGCCTC

TGTACTCAACTGATAGGTGTTTCATATGCTATTGGTTTTGTGCATTCTGTGATTCATGTG

ACTTTGTTATTTAGATTAACTTTCTGCAGATCGAATATAATACAATATTTCTACTGTGAA

ATTTTACAACTGTTCAAAATTTCTTGCACTGATCCTACAATTAATGCATTTCTGATTTTA

GTTTTTTCAGCCTTTATACAAGTCTTGACTTTTATGGCCATCATAGTCTCTTATACCTGT

GTCCTCTTTGCCATTCTGAAAAATAATTCTGAAAAGGGCAGAAGCAAAGCCTTCTCCACG

TGCAGTGCCCACCTGCTCTCTGTCTCTTTGTTCTATGGCACTCTCTTCTTCATGTATGTG

CGTCCCGGGTCTGGCCCAGCTGAAAATCAGGACAAAATGTATTCTTTATTTTACACGATA

ATAATTCCCCTACTAAATCCTTTTATTTATAGCCTGAGAAACAGAGAGGTTTCAGGTGCC

TTGAGAAGACTAATGAAGAAATAA

>LoafORs13.6P

ATGCCAGAAGAAAATAGGACTCTGGTGACAGAGTTTGTTCTCACAGGACTTACAGATCGC

CTATGGCTGCAGGTCCCACTGTTCCTGGTGTTCTTGGTGATCTACCTCATCACCATGGTG

GGAAATCTCGGACTGATGGCTCTCATTTGGAGGGACCCCCATCTTCACACGCCCATGTAC

TTATTCCTTGGTGGTTTAGCCTTTGCAGATGCTTGCACTTCAACCTCTGTGGCCCCTAGG

ATGCTGATCAATTTCTTAGACAGAACTACAATGATATCTCTGGCAGAATGCATCACCCAG

TTTTTTTTTTTT/TTTTTTTTTTTTGCTTTCAGTGCAACTACAGAATGCTTCCTCCTGGT

AGTGATGGCATATGACAGATATGTAGCTATATGTAACCCTTTGCTTTATCCTGTGGTGAT

GTCCAACAGACTCTGCACTCAGTTGATAAGTATTTCATACGCTATCGGTTTTCTGCATTC

CCTGATTCATGTGGTTTTGTCGTTAAGGCTAACTTTCTGCAGGTCTAATATAATCCATTA

TTTCTACTGTGAAATCTTACAACTGTTCAAAATTTCATGCACTGACCCATCTACTAATGC

ACTAATGATATTTATTTTTGGCATATTTATACAAATATTCACTTTAATGACCATCATAAT

CTCTTATATTCGTGTGCTTTTTGATATCCTAAAAAAAAAAAAATCAGAAAAGGGCAGAAG

TAAAGCCTTCTCCACATGCAGTGCTCATCTGCTCTCTGTCTCTTTGTTCTATAGCACACT

TTTCTTCATGTATGTGTTACCTGATAAATATCAGGATCAGATGTATTCACTGTTTTACAC

AGTTATAATTCCTCTGATAAACCCCTTTATTTACAGTTTGAGAAATAAAGAGGTTATAGG

TGCCCTGAAGAAAGTTACAAAGAAG

>LoafORs13.7

ATGTCAGAAGAAAATAGGACTCTGGTGACAGAGTTTGTTCTCACAGGACTTACAGATCAT

CTATGGCTGCAGGTCCCACTGTTCCTGGTGTTCTTGGTGATCTACCTCATCACCATGGTG

GGAAATCTCGGACTGACGGCTCTTATTTGGAAGGACCCTCATCTTCACACGCCCATGTAC

TTATTCCTTGGTGGTTTAGCCTTTGCAGATGCTTGCACTTCAACCTCTGTGACCCCGAGG

ATGCTGGTCAATTTCTTAGACAGAACTACAATGATATCTCTGGCAGAATGTATCACTCAG

TTTTATGTTTTTGCTTCCAGTGCAACTACAGAATGCTTCCTCCTGGTAGTGATGGCATAT

GACAGATATGTAGCTATATGTAACCCTTTGCTTTATCCTGTGGTGATGTCCAACAGACTC

TGCACTCAGTTGATAAGTATTTCATATGCTATCGGTTTTTTGCATCCCCTGATTCATGTG

GTTTTGTTATTAAGACTAACTTTCTGCAGGTCTAATATGATCCATTATTTCTACTGTGAA

ATACTACAACTGTTCAAAATTTCTTGCACTGACCCATCTACTAATGCACTGATGATATTT

ATTTTTGGCGCACTTATACAAATATCCACTTTAATGACCATCATAATCTCTTATACTCGT

GTGCTCTTTGACATCCTGAAAAAAAAATCAGAAAAGGGCAGAAGCAAAGCCTTCTCCACG

TGCAGTGCTCATCTGCTCTCTGTCTCATTGTACTATGGCACTCTCATCTTCATGTATGTG

CGCCCTGCATCTGGCCTAGCTGAAGACCAGGACAAAATGTACTCTCTGTTTTACACGATT

CTAATTCCTCTGATAAACCCCTTTATTTACAGTTTGAGAAATAAAGAGGTTATAGGTGCC

CTGAAGAGAGTTACAAAGAAGTAA

>LoafORs13.8P

ATGTCAGAAGAAAATAGGACTCTGGTGACAGAGTTTGTTCTCACAGGACTTACAGATCGC

CTATGGCTGCAGGTCCCACTGTTCCTGGTGTTCTTGGTGATCTACCTCATCACCGTGGTG

GGAAATCTCAGACTGATGGCTCTTATTTGGAAGGACCCCCAACTTCACACGCCCATGTAC

TTATTCCTTGGTGGTTTAGCCTTTGTAGATGCATGCAGTTCAACATCTGTGACCCCGAGG

ATGCTGGTCAATTTCTTAGACAGAACTACAATGATATCTCTGGCAGAATGCATCACCCAG

TTTTTTTTTTTT/TTTTTTTTTTTTGCTTCCAGTGCAACTACAGAATGCTTCCTCCTGGT

AGTGATGGCATATGACAGATATGTAGCTATATGTAACCCTTTGCTTTATCCTGTGGTGAT

GTCCAATAGACTCTGCACTCAGCTGATAAGTATTTCATATGCTATTGGTTTTCTGCATTC

CCTGATTCATGTGGTTTTGTCATTAAGACTAACTTTCTGTAGGTCTAATATAACCCATTA

TTTCTACTGTGAAATATTACAACTGTTCAAAATTTCATGCACTGACCCATCTACTAATGC

ACTAATGATATTTATTTTTGGTGTATTTATACAAATATTCACTTTAATGGGCATCATAAT

CTCTTATATTTGTGTGCTCTTTGACATTCTGAAAAAAAAATTGGAAAAGGGCAGAAGCAA

AGCCTTCTCCACGTGCAGTGCCCATCTGCTGTCTGTCTCTTTGTTCTATGGCACACTCTT

CTTGATGTATGTGCTTCCTGAGTCAGGGCCAGATAAATATCAGGATCAGATGTATTCACT

GTTTTACACAATTATAATTCCTCTGATAAACCCCTTTATTTACAGTTTGAGAAATAAAGA

TGTTATTGGTGCCTTGAAGGGAGTTCCAAAGAAG

>LoafORs13.9

ATGTCAGGAATGGCTAAAGAGAATCGCTCCTTGACAACTGAGTTTATCCTCAAAGGATTT

ACGGATCACCCAGACCTGAAGGCCCTTCTGTTTGTGGGGTTCTTTGCTATTTATCTGATC

ACCATGGTGGGGAATCTTGGTTTGGTGGTGTTGATTTTCATGGAGCGCCGTCTCCACACA

CCCATGTACATCTTTCTGGGCAACCTGGCTCTGATGGATTCCTGCTGTTCCTGTGCCATT

ACCCCCAAGATGTTAGAGAACTTCTTTTCTGAGGACAGAATGATTTCCCTCTATGAATGC

ATGGCACAATTTTATTTTCTCTGTCTTGCTGAAACTGCGGACTGCTTTCTCCTGGCAGCA

ATGGCCTATGATCGCTATGTGGCAATATGTCGTCCACTGCAGTACCACACCATGATGTCG

AAGAAACTCTGCATTCATATGACCATAGGGTCCTTCATAGCTAGTAACCTGCATTCCATG

ATTCATGTTGTGCTTCTATTAAGGTTAACCTTCTGCAGGTCTAATCAAATTGATCACTTT

TTTTGTGATATTTTGCCATTGTACAGACTATCCTGTACTGACCCATTTATTAATGAACTA

ATGATATATATTTTTTCAATGCCTATTCAAGTCTTCACCATTGCCACTGTCTTCATCTCT

TATCTCTGCATCCTTTTCACCATTTTCAGAACTAAACCCAAAGAGGGGAGAGGTAAAGCC

TTTTCTACCTGTGCATCTCACTTTCTCTCTGTCTCAATATTCTACATTTGTCTTCTCATG

TATATTCGACCATTTGAAGAAGGGGATAAAGATATACCAGTGGCAATTTTTTATACAATA

GTAATTCCTTTACTAAATCCTTTTATTTACAGTCTGAGAAATAAGGAGGTGATAAATGCT

TTAAAAAAAATCAGGAGGAACTATAATATTCTTAAACAAACTTTATCCTCTACAACAAAT

TGA

>LoafORs13.10

ATGTTTGAAAGCAATCACACAGTGACAACTGAGTTTATTCTCACGGGATTTATGGGTCAC
[truncated: 12,105,043 more chars]
