# Supplementary material for: Extreme expansion of the olfactory receptor gene repertoire in African elephants and evolutionary dynamics of orthologous gene groups in 13 placental mammals
Source: HighWire-hosted journal article supplement (doi:10.1101/gr.169532.113), 2014-07-22
Supplement: Supplemental_Dataset_S2.docx [file Supplemental_Dataset_S2.docx]

**Dataset S2.** Amino acid sequences of the OR genes in African elephants, horses, cows, rabbits, guinea pigs, or mice. “Loaf”, “Bota”, “Eqca”, “Orcu”, “Capo”, and “Mm” represent African elephant, cow, horse, rabbit, guinea pig, and mouse, respectively. A gene name with “P” and “T” indicate a pseudogene and a truncated gene, respectively. An asterisk and a slash in an amino acid sequence represent a stop codon and a frameshift mutation, respectively.

>LoafORs1.1P

TRILYLGKMSFTNEREWPMLWTAILVANMATILGSYILVGLIPLDQ*LYQ

PMYHLLTHLPLLDTAYVSTTLPQAPVHMASQHVTLSLACCGTHLNVNDSL

GSCKAILLAAMALYCCLAMC*PLCYAAIMTPTHC/WALSFLLSVPNTVAA

LCLFFCPGRYSINYFI*ELPIVLKTTCADTTANHMLVYSLDTPILLMILV

FILALYTMILEALVKLASTRSCLNALSTCSSHLAVMGLFYGTMTTRYLGC

YGSIALPNKHHR

>LoafORs1.2P

MARQNDSRVTDFVLEGLTG*PELHSPPFLLFLAIYSVTVMGNVGIIFLIA

FNSKLQAPMYFFLSNLSAIDLFYS*VITPKLLENFVLEQNITSYPACMTH

FFFFCFFATAECYMLTAMAYDRYAAICSPLFYNVVMSQKVCNVLMTEAYI

MASIGAVPHMISMIELSFCGDNVIHHFFCDVLPLLKLSSSSTYINELLLI

IVGRFNIFATTVAIIISYAFILYNILCIPSTEGKSKAFSTCGFHLTAVGI

IYIIFIVL*VKVYKSSQSLTQKPIYTLLHT

>LoafORs1.3P

MEINDISWEDFILAGFSEYLKAEFIFSPFVSGFYTMTLAGNMAVILVSLL

DS*LHTPMYFFL*NLSFLDISFTTCIVPQMLVNFW

>LoafORs1.4P

CHLALATSWLSGFANSLLQSSLAIVLPL*GHHHFLCEVLVIVKLSSVNTG

PTKSKMLIVHLFILAIPVCVILTSYACIARTMVRVHSAEG*QKAFGTCTS

HLTVALLFYGTIMFMYLQPKNNYS*NHGKILVLVYTIVAPTMNPLIYSLR

NKDVKRAMRKVIWKDLV

>LoafORs1.5

MERTNWTTEVEFILQGLSEYPKAEKLLFVMCLLMYLVILLGNSTLIILML

LDFHLHTPMYFFLGNLSLLDIWYTTSFIPSMLIHFLSEKKNISFTRCVVQ

MSVSYTMGSTECVLLAVMAYDRYVAICNPLRYSIIMNKVLCIQMAAVSWG

LGFLNSLVETVLAIRLPFCGKNVINHFVCEILAFVKLACTDISLNEITIM

LGNVIFLFSPLLLICISYIFILSTILRINSAEGRKKAFSTCSAHMTVVIV

FYGTILFMYMKPKSKDSTFDKLVALFYGIVTPMFNPIIYSLRNKEVHGAM

KKLMSRHWFKRKQ*

>LoafORs1.6P

YDGV*PICSHLQPPKISPIIKNSRVCAHIAAGFWVTGCLSTLAETMSVLQ

LPLCGNNIINHFTCEIPAVLKLICVDTSMVEFLMLVISVLLIPMSVLLIC

DSYALILSNILRISSVDG*SKTFSTCAAHLTVMVLLYGTALSMYRKPSAV

ESQEIDKCVTL

>LoafORs1.7

MDRENQTRVTEFLLLGFSGEPEQEKILFGMFMWMYLVTITGNFLITLAIT

CDSHLHKPMYFFLANLSCVDICFSSVTTPKMLVNHMLGNESISYVECMIQ

IYFFITFINMDGFLLSVMAYDRYVAICSPLHYSMIMRPKLCVLLVAVSWI

ITNMHALLHTLLMVQLMFCSNNAVHHFFCDPYAILKLSCSDTFINELMIS

TAGGLMSITPFTCITVSYAYIFSNVLKFPSIQAIRKALSTCGSHLTVVSL

FYGAILGVYMHPSSSYSVQDTVATVIFTVVTPLVNPFIYSLRNYDMKGSL

RKLIIRRLVSPRIRKF*

>LoafORs1.8

METWSNRSSTDDFVLLGIFSHSPTDLVLFSALMVVFTVALCGNVLLILLI

IIDPRLHTPMYFFLSQLSIMDLMLVCTNVPKMAVNFLSGRKSISFVGCGV

QIGLFVSLVGSEGLLLGLMAYDRYVAVSYPLHYPILMSQRICLQIVGGSW

VFGIIDGLIQMVIVMTFPYCGLRDVNHFFCEMLSVLKLACIDTSLFENVI

FACCVFMLFLPFSIIVASYARILGAVLHMCSTQARKKALATCSSHLTAVS

LFYGATMFIYLRPKHYRAPSHDKVVSVFYTVLTPMLNPLIYSLRNREVMG

ALRKGLDRCRISIQN*

>LoafORs1.9

METWSNRSSTDDFVLLGIFSHSPTDLVLFSAVMVVFTVALCGNVLLILLI

YIDPRLHTPMYFFLSQLSIMDLMLVCINVPKMAVNFLSGRKSISFVGCGI

QTGLFVSLVGSEGLLLGLMAYDRYVAISYPLHYPIFMSQRICLQIVGGSW

VFGIIDGLIQMVIVMTFPYCGLRDVNHFFCEMLSVLKLACVDTSLFENLV

FACCVFMLFLPFSIIVASYARILGTVLHMCSTQARKKALATCFSHLTSVS

LFYGAAMFIYLRPKHYRAPSHDKMVSVFYTVLTPMLNPLIYSLRNREVMG

ALRERLGRCRISIQQGILHLALPPPSSVSLDK*

>LoafORs1.10P

PHLHRSLTSYTHVLLP*LSLMDLMLVCNIVPKMAVNFLSGRKSISFVGCG

IQIGLFVSLVGSEGLLLGLMAYDRYVAISHPLHYPILISQRVCLQIAGGS

WAFGILDGMIQIVATMTFPYCGSRNVDHFFCEVPALLNLACADPSLFENL

LFACYFFMVLLPFSIIMASYSHILAAVPHMHSAQTRKEALATCSSHLTAV

SLFYGPAMFIYLRLKRYRTPSHDKVVSVFYTVLTPILNPLIYSLRNGEVV

GVLRKELDCCRIVSQH

>LoafORs1.11

MVWVGNQTLIPHFILLGLFTHSPLHFFFFSIIMVMFLVALSANGLMIFLI

HVDSRLHSPMYFFLSWLSLMDLMLISTIVPWMAVDFLLGGGAISFTGCGL

QILFFLTLLGDECFLLAFMAYDRYVAISNPLRYSMVMSRRVCWIMVAGSW

LFGLVDGLIQAVFTLRFPYCSSQEIDHFFCDVPTVLKLACTNTSLYETMI

YVCCILMLLLPFSVISTSYLRILVAVLCMRSAEGRQKAFATCSSHMAVVS

LFYGAAMITYMRPQAYHSSKQDKVVSAFYTMITPMLNPLIYSLRNKEVTG

ALRKLLGRCSFGEGQG*

>LoafORs1.12

MDTWLNQSYTDDFVLLGIFSYCATDLVLFSMVMMVFTVALCGNVLLISLI

YIDPRLHTPMYFFLSQLSLMDLMLVCNIVPKMAVNFLSGRKSISFVGCGI

QIGLFVSLVGSEGLLLGLMAYDRYVAISHPLHYPILMSQRVCLQIAGGSW

AFGILDGMIQMVAAMTFPYCGSRNVDHFFCEVPALLKLACADTSLFENLL

FGCCVFMLLLPFSIIMASYACILAAVLCMNSAQARKKALATCSSHLTAVS

LFYGAAMFIYLRPKHYGTPSHDKVVSVFYTVLTPMLNPLIYSLRNGEVMG

ALRKGLDRCRIVS*

>LoafORs1.13

MVWMGNQTLIPHFILLGLFTHSPLHLFFFSIIMVMFLVALSGNGLMILLI

SVDSHLHSPMYFFLSWLSLMDLMLISTIVPRMAVDFLLGGGAISFTGCGL

QILFFLTLLGDECFLLAFMAYDRYVAISNPLRYSVVMSRRICWIMVAGSW

LFGLVDGLIQAVFTLRFPYCSSQEIDHFFCEVPAVLKLACADTSLYETMI

YVCCILMLLLPFSVISASYLRILVAVLCMRSAEGRKKAFATCSSHMAVVS

LFYGAAMITYMRPQAYHSSKQDKVVSAFYTMITPMLNPLIYSLRNKEVTG

ALRKLLGRCPCGEGQG*

>LoafORs1.14

MDTWLNQSYTDDFVLLGIFSYCATDLVLFSMVMMVFTVALCGNVLLISLI

YINPRLHTPMYFFLSQLSLMDLMLVCNIVPKMAVNFLSGRKSISFVGCGI

QIGLFVSLVGSEGLLLGLMAYDRYVAISHPLHYPILMSHRVCLQIAGGSW

AFGILDGMIQMVAAMTFPYCGSRNVDHFFCEVPALLKLACADTSLFENLL

FSCCVFMLLVPFSIIMASYAHILAAVLRMNSAESRKRALATCSSHLTAVS

LFYGAAMFIYLRIKHYGTPSHDKVVSIFYTVLTPMLNPLIYSLRNGEAMG

ALRKGLDRCRIVSQH*

>LoafORs1.15

MVSVGKQTLIPHFILLGLFTHSPLHLFFFSIIMVMFLVALSATELMILLI

NVDSHLHSPMYFFLSWLSLMDLMLLSTIVPRIAMDFLLSGGTISFTDCGL

QILFFLTLLGDECFLLAFMAYDRYVAISNPLRYSVVMSRRVCWIMVAGSW

LFGLVDGLIQAVFTLRFPYCSSQEIDHFFCEVPAVFRLACADTSLYETMN

YVCCILTLLLPFSVISASYLRILVAVLCMRSAEGRQKAFATCSSHMAVVS

LFYGAAMITYMGPQTYHSSKQDKVVSAFYTMITPMFNPLIYSLRNKEVTG

ALRKLLRRCPF*

>LoafORs1.16P

MDTWLNQSYTDDFVLLGIFSYCATDLVLFSMVMMVFTVALCGNVLLISLI

YINPRLHTPMYFFLSQLSLMDIMLVCNIVPKMAVNFQSGRKSISFVGCGI

QIGLFVSLVGSEGLLLGLMA*DHYVAISHPLHYAILMSQRVCLQIAGGSW

AFGILDGMIQMVAAMTFPYCGSRNVDHFFCEVPAFLKLACADTSRFENLL

FACCVFMLLLPFCIIMASYAHILAAVLRMNSAETRKEALVTCSSHLTAVS

LFYGAAMFIYLRIKRYGTPSHDKVVSVFYTVLPPMLKPLTYSLRNGEAMG

ALERG

>LoafORs1.17

MVWMGNQTLIPHFILLGLFTHSPLHFFFFSIIMVMFLVALSANGLMILLI

NFDSRLHSPMYFFLSWLSLMDLMLISTIVPRMAVDFLLGGGAISFTGCGL

QILFFLTLLGDECFLLAFMAYDRYVAISNPLRYSVVMSRRVCWIMVAGSW

LFGLVDGLIQAVFTLRFPYCSSQEIDHFFCDVPTVLKLACTDTSLYETMN

YVCCMLMLLLPFSVISASYLWILVAVLCMHSTEGRQKAFATCSSHMAVVS

LFYGAAMITYMRPQAYHSSKQDKVVSAFYTMITPMLNPLIYSLRNKEVTG

ALRKLLGRCPCGRETGLGWHQQIWDS*

>LoafORs1.18

MLNLPTTTAQDDIFVCLFLRVTTVELWNHTTIMNFLLSGLFSHTPYGFFL

FSLVLLASMAALAGNILLLFLIQANVHLHIPMYFFLSQLSIMDLTMMCSV

VPKMAANFLSGSKIISQGACGAQIFLVVMVGGAECFLLAVMAYDRYVAVC

HPLRYSVLMNWKVCSLMTKASWMGGVADSVINVSMVFSFLYCSSREVDHF

FCEVPALLRISCADTLLFEDFIYACCIVMLLLPIGVIVASYAQVLTAVIR

MPSTEGKQKAVTTCSSHLVVVGLYYGGAIFSYMHRASSKTPTRYRATSIF

YTVLTPMLNPLIYSLKNKEVTRALKKMLGRWGV*

>LoafORs1.19P

LVSRLDLQLHTTMYFFLTHLSFIDLTHVTCISPQMLVNFRGPDKSIGFVG

CAIQLLITLGLEGTECVLLAMMAYDCYIAVCQRLHYFTLMPT*LSWTLAS

ISWFIGFSNSLVHTIITVTLPQCGHHLINRLYCETPLVVQFACVDTKNYR

KEIMVLRSIFFVFPLAPILLSYEYIAHSVLRMKTPRG*KKVLGTCGSHLT

KVSIFYSTL

>LoafORs1.20P

MGRFNTSYRDGFILVGFSDWPQLELALFVFISIFYSLTLFGNTTIIALSC

LDHRLHTPMYFFLCHLSFLDLCYTTNIVPQLLINLHGSDQTITYGGCMAQ

LFIFLAVGSTESVLLVVMAFDRYAAVCRPLHYTTIMHPSFCQTLALISWA

GGFMNSVVQTGLMMAMPLCGPHHLNHFFCEMPVLLKLACEDPHGTEVKMF

VARVIIVVFPAALILGSYVHIAQAMLRVRSIAGHRKAFGTCGSHLLVVSL

FYGSAMYTYLQPTHSYSQSEGSLLPFFIL*LPPCL

>LoafORs1.21

MEINDSSWEDFILVGFSEYPKAEFIISLFVTGFYTMTLAGNMAIILVSIL

DSQLHTPMYFFLRNLSFLDISFTTCIVPQMLVNIWSGHKTISYVGCIVQY

SVALALGSIECVLLAVMAVDRYVAVIWPLRYATVMHQRICHLLAATSWLS

GFANSLFQSSLAIILPLCGHHHVDHFFCEVLVIVNLSCVDTGPTESKMLI

ARLLITVIPVYIILTSYACIAGTVVRIPSAEGRQKAFGTCASHLMVVLLF

YGTVMFMYLQPKNNYSQNQGKILALVYTIVAPTMNPLIYTLRNKDVKRAM

RKVIWKDLV*

>LoafORs1.22

MGGFNTSYRDGFILVGFSDWPQLELALFIFISIFYPLTLFGNITIITLSR

LDLRLQTPMYFFLCNLSFLDLCFTTSTVPQLLINLHGSDQTITYGGCVAQ

LFIFLTLGSIECVLLVVMAFDRYAAVCRPLHYTTIMHPRLCQTLAAISWM

GGFMNSGVQTGLMMAMPLCGLHHLNHFFCEMPVLLKMACEDILGKEVKMF

VARVIIVMLSAAVILGSYVHIAQAVLRVKSVAGRRKAFGTCGSHLLVVFL

FYGSAIYTYFQPMHSYSPSEGKFVALFYTIITPMLNPLFYTLRNKDVKGA

LKKIVRKGRDSA*

>LoafORs1.23

MEINDSSWEDFILVGFSEYPKAEFIISLFVTGFYTMTLAGNMAIILVSIL

DSQLHTPMYFFLRNLSFLDISFTTCIVPQMLVNIWSGHKTISYVGCIVQY

SVALALGSIECVLLAVMAVDRYVAVIWPLRYATIMHQQICHLLAATSWLS

GFANSLFQSSLAIILPLCGHHHVDHFFCEVLVIVKLSCVDTGSTESKMLI

ARLLIIVVPVYIILTSYACIAGTVVRIPSAEGRQKAFGTCASHLMVVLLF

YGTIMFMYLQPKNNYSQNQGKILALVYTIVAPTMNPLIYSLRNKDVKRAM

RKVIWKDLV*

>LoafORs1.24

MGGFNTSYRDGFILVGFSDWPQLELALFIFISIFYPLTLFGNITIITLSR

LDLRLQTPMYFFLCNLSFLDLCFTTSTVPQLLINLHGSDRTITYGGCVAQ

LFIFLALGSTECVLLVVMAFDRYAAVCRPLHYTTIMHPRLCQTLAAISWV

GGFMNSAVQTGLMMAMPLCGLHHLNHFFCEMPVLLKMACEDIQGTEVKMF

VARVIIVMLPAALILGSYVHIAQAVLRVKSVAGRRKAFGTCGSHLLVVFL

FYGSAIYTYLQPMHSYSPSEGKFVALFYTIITPMLNPLIYTLRNKDVKGA

LKKIVRKGRDSV*

>LoafORs1.25

MEINDSSWEDFILVGFSEYPKAEFILSLFVSGFYTMTLAGNTAIISVSIL

DCRLHTPMYFFLRNLSFLDICFTTCIVPQMLVNIWSGHKTISYVGCIVQY

SVALALGSIECVLLAVMAVDRFVAVIWPLRYAKIMHQRICHLLAATSWLS

GFANSLLQSSLVIILPLCGHHHLDHFLCEVLVIVKLSCVDTSPAESKMLI

VRLIILAIPVCIILTSYACIAGTVVRMHSAEGRQKAFGTCASHLMVVLLF

YGTIMFTYLQPKNNYSQNQGKILALVYTIVAPTMNPLIYSLRNKDVKRAM

RKVIWKDLV*

>LoafORs1.26

MVGGNESSITDFILVGLFPEFQHSIILNSMIIFIYILAFLGNMLLIVLIS

GDSQLHTPMYILLSQLSVIDLTLTSTIVPKMAYNFFTGEKTISRIGCGTQ

SFFYLLMGMSECLILTLMAYDRYVAVCNPLHYPTIMGPTFCLHMVATCWI

GGSISSFIHTVYPMHFPICGSREIHHFFCEVPVLIKLSCEDTSVYQLVVV

VTSIVLLVVPFILIIASYTLIFLTVLRMNSIKGRKKVLATCSSHLTVVSL

FFGPNIFIYMTFTSSHSPEQDQALSVFSNILTPMLNPLIYSLRNKEVVAA

LIKLVGRPVVL*

>LoafORs1.27

MVSVNESSITDFILVGLFPEFQHSIILNSVIVFIYTLAFLGNTLLIVLIL

GDSRLHTPMYFLLSQLSVIDLTLTSTIVPKMAYNFFTGERSISWIGCGTQ

SFFFLMLGMSECLILTLMAYDRYVAVCSPLRYPTIMSPSFCLHMVATCWI

GGSISSFIHTVYPMHFPICGSREIHHFFCEVPVLIKLSCEDTSVYQLVVV

VTSIVLLVVPFSLITASYTLVFLTVLHMNSVKGRKKVLATCSSHLTVVSL

FFGPNIFIYMTFTSSHSPEQDQALSVFSNILTPMLNPLIYSLRNKEVVAA

LSKLMGRCVVS*

>LoafORs1.28

MRLRYEENNGTSTTDFILLGLFPGFQHISLLVYLFLLIYLIAITGKTALI

FLIWVDFYLYTSMYFSLNQLSLIDLVYISSCVPKMVISHSLGKHSISQVG

CGVQMFFCLTFGGAECLLLTVMSFDRFVAICNPLRYPIIMSPKVCLLMVV

VSWSGGALNSLIQTTYSMHFSVCGLKEINHSFCEMLATLKLSCEDTLDYE

IVVSVVSIALILFPLSFIMASYIRIFFTVLRMNSPEGRNKALATRCSHLT

VVSLYLGPGIVVYMTPGSPDSPGLDQGFSVFYTILIPMLNCFIYSLRNKE

VVGALRKAMGRNLIPK*

>LoafORs1.29P

SDFILLGLFPGYRHSSILISIILIIYIIAVAGNATLVLLIWVDSRLHTSI

YFFLSQLSLIDLAYVSSTDPKMATDF*EQNNLPCWLWCSEVLLSDIS*CR

MHPPDSHGL*PLCGCV*PSEISNHYEFQCLSADGCWVLDLR*EELYSY*V

MSYQKERL*LCYSVQSLVIITSVLNSLAQTIYSVHFPNCEKREVNYFFCE

MPAILMLPNGGGGYEHHFYYHATIFYYGNPGGIVIKCY

>LoafORs1.30P

MDQRNEA*GTDFYPPGTLLGYETYQSFYLCHASDLFMALILNSTLNLLIW

VDSYLHIPM*VLLRQLALMDLTLISSFVPKMAINFSGRRNFSWLA*SSF*

L*EPLRATSSPSCLMISMRPSTTL*DMPSSSVCVQMAAFSWAGGAVTSLV

HTACAMHFPTCSKKKKKKNFFSF*FQREEISHFLHELTAILKLACKDISA

YEKAVVVTRNMVLLSPLFLILSSYAVIFLAILHMNSSEGRDKTTPI*LWY

ASTMVLPWWSSSYHNAKLGQVLFILSTMLNPLFYSLRSKQVVGALKKEL

>LoafORs1.31P

PMYSVLCQLSLIDLAVISTSVPIRVTNFFSGKRTISQIGCGTQIFFSLTL

GIAECLLLTLMSYNHYIAICNPLQYSVIMSHNIYTQMVIGFWAGGAVTSL

IHTVCVMQFPISCPQKIPHFLCEVMALLKLTSKGISAYVKSVVVSSPLVV

LIPLSLILPSHILIFLAVLHRNSLEGGNKALATCSSHLCVVSLSFGPAIL

VYMIPGSSMTPKLNQSPLMLNVVLTPMLNPLIYSLRNKDVIAAMKSII

>LoafORs1.32P

MEQEN*STTADFIFLDLFSDSQHAGFLVTILLLILLAAITGSSTLALLIW

GVAHLHTFMQFLLSQLSFMDLTLIFTTVPKMAADLFSGDRDISYIGYRVQ

VFIYLMLGVAECILLNLLDFDHYLDICSLLRYPVFMTPRLCVQMAARSRP

GGILVSNEH/GVFLSLMNTIYAMHFSTCCSRKIQFCFFVCVCELTALQKL

SYEDTSTYEKVILVSGIIFLLIPFGFILTSYILIFLTFLHVNNPKEKSKA

LAMCFSQFSVVNLYFGPTIIIHTTPGFSLPPEMDQHHFVFDVLGTPMLKP

LIYSLRNKEVLRALRKVLN

>LoafORs1.33

MDKKNETSVTDFILLGLSLDMKHINLFIGAMLLIYIVALILNSILILLIW

AHSHLHTPMYFLLSQLALMDLMLISSFVPKMAINFFSGRRNISRLACGTQ

IFFFLTLGIAECILITLMSYDRYVAICNPLRYAIVMSPRVCVQMVAFSWA

GGAITSLVHTAYAMHFPTCGSKEVSHFLCELTAILKLACEDISAYEKAVV

VTSIVVLLIPLFLILSSYAVIFLAILHMKSPEGRDKALTTCSSHLTVVCL

YYGPAIVVYMRPSSYHNAKLDQVLFILGPILTPMLNPLIYSLRNKEVVGA

LRKVLS*

>LoafORs1.34P

NESTTTDFILLGLFSDS*HPGFVVAIVLPIFVVAIPVNIILALQIWGDVH

LHTPTYFLLNLLFLMELTLISTTDHKMATNFFS/SQNRDIFHVGCGVQIF

LHLMLGVAECVHLPLMALDCYLAICSSLRYPDFMCANCS*LMGWGCCCLP

NAHNLCHIHFDLWLQENSRFFFFFFCEVIALLKLSCEDTSTY*KVLLVSG

IIFLLIPFGFILTSY/LNSPEGKNKALATCSSYFSKLL*STHAYIHDPWF

LPPPEVDKHLFVFDVLIAPGLNSLIYSLRNKEVIEALRKVLGR

>LoafORs1.35P

SILITSILLVYIFAFTGNTILIFLIWVDFHPYAPMYILLSCFFLIDLALI

FTTVPKMAINFFSGKKYISKVVCGTQNFFFFVFVGVECLLLTLMSYDCYV

AICNP/PLRYPVIVNPRV*LLMVLVL*GGGTLNSLIKTIYTMHFSLLWLQ

GDPTLFSRDACCPEALL*RDFLV*DSVICHLHCVCSSLGTHHGFLHAIFL

KVLHMNSSEGRKKALPTCSSHLAAVILYYGPAMIIYMTSHSFHTSDQDEI

LSIINDSSPPC*NP

>LoafORs1.36P

TTDFILTGLFANMKYVSILVYTITLIYFPAVTGNFILLLLIWMDLRLHTS

MYFLL/FCFSQLSFIDLAFISSTRPKMAINFFSGKKNITHLTCGTQPFFF

FTLGGAESILLALIAYDH*VAFCNPVRYIVIMN/YAISWLICGSREIHHF

YC*VPGIMKISCKDTFTYELVAFMMGIAYMIIPFGRIMACYTLIFLTVLQ

MKTPQGRNKTLATCSSHLTVVSMW

>LoafORs1.37P

NEASTDFIVLGLFPGFRYPHLLILVILHIYIIAFTGNALLILLIWLDTCL

HTPVYSLLSLFSLIDLSYITSTDPKIVTSYFTGRKNISYFACAAQLFFFL

TLGLAECILLTFMAYVAYMALCNPLRYTILMSPRVCLQIAAAVWIGAALA

SLVHTIYPMHFPIRGSRKINHYFCEKPAILRLSCVDISTYEMVKFVSTIV

FLLVPYVFTLSSYTLIFLTVLRMNFHKGRNKALAPCSSHLTVVSVYFGQA

IFIDMTPSSSHT*TRPDRSR

>LoafORs1.38P

MNSTEGRRKALTTCSSHMVVVLLFFGAFIYTYMSPRS*NTAEQNMVVSAF

HTIITPVLNPLIYSLWYKDITGALRCMMPSGMRLRKAGNVKT

>LoafORs1.39

MDNITWLANHTGRSNFILLGLFSQSKHPTLLCMVIFVIFLMALTGNTILI

LLIYSNAHLHTPMYFFISQLSVMDVMYISVTVPKMLMDQVMSVKKISVPE

CGIQMFLYLTLGGSEFFLLAAMSYDRYMAICHPLHYPVLMNHKICFLLAS

GCWFLGSVDGFMLTPITMTFPFCRSREIHHFFCEVPAIMKLSCSDTLLIE

TLMYLCCVLMIFIPVTVISSSYTFILLTIHRMNSAEGRKKAFTTCSSHMT

VVILFYGAAVYTYMIPSSYHTPEKDMVVSFFYTILTPVLNPLIYSLRNKD

VTGAMKKMFNVEPVKKV*

>LoafORs1.40P

NATEGCKKALATYSFHTVIVLLFFGASIYTYMLARSYHTAEQDMMVSAFY

TIITPLLNPLTYSFLNKDVTGALRSMIPSGMRPRKVGNVKT

>LoafORs1.41

MDNITLLVNHTGGSDFILLGLFSQSKHPTLLCTVIFVIFMMALTGNAILI

LLIHSNAHLHTSMYFFISQLSAMDVMYISATVPKMLMDQVMGVKKISVPE

CGIQMFLYLTLGGSEFFLLAAMSYDRYMAICHPLHYPVLMNHKICFLLAS

GCWFLGSVDGFMLTPITMTFPFCRSREIHHFFCEVPAVMKLSCSDTTLIE

TLMYLCCVLMLLIPVIVISSSYTFILLTIHRMNSAEGRKKAFTTCSSHMT

VVILFYGAAIYTYMIPSSYHTPEKDMVVSFFYTILTPVLNPLIYSLRNKD

VTGAMKKMLNVEPVKKA*

>LoafORs1.42P

MNST*GFKKALVTCSSQAVVVLLFFGASMYMLARSYHTGEQDMMVSAFYT

IITPLLNPLTYSFWNKDITGAPRSMIPSGMRPRKVGNVKT

>LoafORs1.43

MDITWLTNHTGGSDFILLGLFSQSKHPTLLCVVIFVIFLTALIGNAILIL

LIHSNAHLHTPMYFFISQLSVMDVTYISATVPKMLMDQVTGVKKISVPEC

GIQMFLYSTLVGSEFFLLAAMACDRYMAICHPLRYPVLMNYRICLFLATG

CWFLGSVDGFILTPITMTFLFCRSREIHHFFCEVPAVMKLSCSDTSLIET

LMYLCCVLMLLIPVIVISSSYTFILLTIHRMNSAEGRKKAFTTCSSHMTV

VILFYGAAIYTYMIPSSYHTPEKDMVVSFFYTILTPVLNPLIYSLRNKDV

G*

>LoafORs1.44P

MNAAEGCKKALATCSSHTVVVLLFFGASIYTYMLARSCHTAEQDMMVSAF

YTIITPLLNPLIYSFWNK

>LoafORs1.45P

MRSVNQTSSTDFILVGLFGSTKHAVLLYSLSFILFLMALTGNALLILLIH

RESCLHTPMYFFISQLSLMDLMYICLIIPKMLMDQVMGDHTISPLGCGVQ

VFFYLTLAGAEFFLLAAMAYDRYAAICRPLHYLLLMNQRVCRLLVSGCWF

LGTVDGLLLTLLP*VSPF/PITMSFPFCHSRKIMNFFCEAPALLKLSCSD

IFLYKTLMYLCCVLMLLVPVSIISTSYGFILHLIHRMNSVEGCRKALATC

SSHMVVVLLFFGASIYTYMLPRSYHTGEQDMMVSAFYTIITPVLNPLIYS

LRNKDVTEALRSMMSSGMRLRKVGNVKT

>LoafORs1.46P

YAAICQPLHYPVIVNI*FCVQVTLASLLSGLVYAGVHTGNTFWLPFRQST

WSISSSVMSPLCCSSLALTPPAMNS*FFSLL*RLVVPPVSSLPYLIFTYF

LLYLSFQPAESEEMPFPPVPSHPGSVCLPQLWQLCVLSKTSETIQDMILS

VFYVIVPPFLNPIIYSLRNKQVGETVRKVILKRFYSGK

>LoafORs1.47

MPNSTTVTEFLLMRFSDVWELRVLHAMLFLMMYLATLLGNFLVVTVTTLA

ESLHTPMYFFLRNLSVLDMCYISITVPKACVIFLLDNRVISMVGCAAQIF

LVILFAFAELLFLTIMARDRYVAICQPLHYPVIMNPRACVQMTLASVFSG

LIYAGVYTGNAFRLSFCRSNVVHQFFCDVPSLLKLSCSNTFSNEIVIFVS

AVVIVGGCFIFIIMSYIRIFSAVLKFPTRGERGKAFSTCVPHILVVTVFV

VSAITVYMKPTSNSPTTQDMIISVFYSIAPPFLNPIIYSLRNKQIKEAVR

TVMSRMLYSEKQ*

>LoafORs1.48

MQKKYPKMPNSTTVTEFLLMRFSDVWDFRVLHAMLFLLMYLATLLGNLLI

VTVTTLDQSLHTPMYFFLRNLSVLDMCYISVTVPRACVIFLLENRVISMV

GCAAQIFLVVLCATAELLFLTIMAYDRYVAICYPLHYPVIMNLRVCVQMT

LISVFSGLIYAGVHTGNTFRLSFCQSNVIHQFFCDIPPLLKLSCSDTFIN

EVVIFFSAVVIVGGCFILIIISYIHIFSAVIKFPTRREKGKAFSTCVPHI

LVVTVFSSSLNAVYMNPTSNSPTIQDMIISVFYCIVPPFLNPIIYSLRNK

QIKEAVRRIMRRIFYSEK*

>LoafORs1.49

MPNSTTVTEFLLTRFSDVWELRVLHSMLFLLTYLATLMENFLIVTVTTFD

KSLHTPMYFFLRNLSVLDTCYISVTVPKACVIFLLDNRVISMVGCAAQIF

LVVLCAFAEMLFLTIMAYDRYVAVCHPLHYPVIMNRRVCVQMTLISILSG

VIYSGFHMGNTFWLIFCQSNVVHLFFCDIPSLLKLSCSDTSSNEIEIFVS

ALVIAGGCFFLIIMSYIRIFSTVFKIPIGGERGKAFSTCVPHIVVVTIFA

ITGSAVYMNPISKSNSFQDMIISVFYCIAPPFLNPIIYSLKNKQIKEALS

RIIKRMLYSGK*

>LoafORs1.50

MTNTSFPVGFILLGFSKWPQMEKVLFWFVAFFYIMIIFGNLTIIVLSCID

PRLYTPMYFFLSNLSFLELCFTTTMVPQMLSNLWGLEKTITYTGCVIQLC

VFLFLGATECILLVVMAFDRYIAVCQPLRYTIIMNPLLCWKLALTAWLSG

LVESLIQSPITLQLSFCSHHRVDDFLCEVPALIRLACGDTSSNEWQLTIS

AILFTILPVGLILTSYGYIAQAVGKIKSEEGRQKAIATCSSHLLVVFMFY

GTVAMVYTDPKNDFASKHGKFFTFFYTVVTPLLNPLIYTLRNKEVKEALL

RLLIKGFSKQR*

>LoafORs1.51P

TNTKFSVDFILLRFS*WPQLGKILFWIVAIFYIMIFFGNLTIIVLPYIDL

CLYIPMYFFISNFSFLELCFTTTTVPQILSNLW*PEKTITYTGRVIQHCV

FICLDATEDVFLVVMAFDRLCCCLP/YVAVCQPLRYTIIMNPPLCWKLSL

MAWLSCLMGSLIQSPITFQLSFCSHHFLDEFLCEVPALIYLVCVDTSSNE

WQLTISAILFTILPVGLILTSYGYIAQAVGKIKSEDGRQKAIATCSSHLL

VVFMFYGTVAMVYTDPKNDFASKHGKFFTFFYTVVTPLLNPLIYTLRNKE

VKESLKRLLKK*ISQ

>LoafORs1.52

MKNSTSSSDFILLGLLVNSQAAGIVFTVILAIFMVAVIANLVMIFLIQVD

SHLHTPMYFLLSQLSIMDTLFICTTVPKLLADMVFQEKTISFVACGIQIF

LYLTMIGSEFFLLGLMAYDRYVAVCNPLRYPVLMNRKVCLLLAAGAWFGG

SLDGFLLTPITMNVNYCGPRSVNHFFCEIPAVLKLACADTSLYETLMYIC

CVLMLLIPISIISTSYSLILLTVHRVRSAEGQRKAFTTCSSHLTVVSIFY

GAAFYTYVLPQSFHTPEQDKVVSAFYTIITPVLNPLIYSLRNKDVMEAFK

KVFVRCSSAQKVATSDA*

>LoafORs1.53P

NSIDFILLGLTTHPLFPEFIFSIFVVAVIANVVMILLIHVDFHLRTPMYF

LLSQLSFMDTVYICITVAKMLQDLLSKEKSTSFLDCSLDISLPDIDWRRI

LPAGPHGL*QICGCVQPSPVPSPHEPQDSLVYGSGLLGWWLLGWIYADPG

HHEFSLMWVPRNQSLFCEIPAVLKLLCMDMSLYETLMYSCCVLMLLIPIS

IISVSYTRILITVHWMNSAEDRRKAFC*LFLPYYGGEHFLRCSLLHQRAT

HSYHTPEKDKVVPAFYTILTPMFNPFIYSLRNKYVAAALRKVLGRWASSQ

RIRERCVSRKY

>LoafORs1.54

MEWGNYSTYADFVLLGLFSNTRFPWLLFALILLVFVISIASNTIMIILIH

VDSRLHTPMYFLLSQLSLMDILYISTIVPKMLVDQVVGQRDITFAGCTAQ

HFLYLTLAGAEFFLLGLMSYDRYVAICNPLHYPALMSRKVCLLIVVAAWL

GGSVDGFLLTPVTMQFPFCASQEINYFFCEVPALLKLSCIDTSAYETAMY

VCCIMMLLIPFSVISASYTRILITVYGMSEAEGRRKAVATCSSHMVVVSL

FYGAATYTYVLPHSYHTPEQDKAVSAFYTILTPMLNPLIYSLRNKDVTGV

LQKALERGFSL*

>LoafORs1.55

MVGSMEEYNTSSTEFTFMGLFGRKDTAGLLFAIVTVIFFTALMANGVMIF

LIHTDSCLHTPMYFLLSHLSFIDMMYISTIVPKMLVDYMLGQRTISFVGC

TAQHFLYLTLVGAEFFLLGLMAYDRYVAICSPLRYPVLMSRKVCWMIIAG

SWFGRSLDGFLLTPITMSFPFCNSREINHFFCEAPAVLKLACTDTSLYET

VMYVCCVLMLLIPFSVVIASYARILTTVHHMSSVEGRKKAFATCSSHMIV

VTLFYGAAMYTYMLPHSYHTPAQDKVFSLFYTILTPMLNPLIYSLRNKDV

TGALRRALGKFKSSQRVSGDAF*

>LoafORs1.56P

MDEDNRTLFSGFTLIGLFPHNKASSFLFSSICAIFFMAIVTNGVMIFLIH

IDPHLHTPMYFLLSHLSFIDVTYISTIEPKMLVDYVLGKGTISFIACTAQ

YFLYMDFVGAEFFLLELMAYDRYVAIYNPLRYAVLMSRRVCWVILASFWF

GGALDSFLLTLLTMSL/PFGTSHKISHFFREAPTMLRLACDNKAAYETVM

YACCVMMLLIPFSVVIASYAQILITVHQMKSAEGKKKAFTTCS*HIMVVT

LFYGAALYTSMLPQSYHTPIKDKIFSAFYTILTPLLNPVIYSLRNTDVTG

A

>LoafORs1.57

MYSGNQTSENQTSSTYFILMGLFDQTKYAAFLYTLIFVLFLMALTGNALL

ILLIHREPCLHTPMYFFISQLSLIDLMYICATVPKMLMDQVTGDYTISHL

GCGVQMFSYLTLAGAEVFLLSAMAYDRYAAICRPLYYPLLMNQKVCHLFM

SGCWFLGMFDGLLLTVMTMSLPFCQFRKIMSFFCEAPALLKLSCSNTPLY

EMFMYLCCILMLLAPIIIVSGSYVLILRLIHSINSAEGRRKAFATCSSHM

VVVLLFFGAGIYTNMLPRSYHTGEQDMTVSAFYTIITPVLNPLIYSLRNK

DVTGALRNLMLSGMRPRKF*

>LoafORs1.58

MNSRNHTSENETSSTYFILMGLFDQSEYAVFLYTLTFVFFLMALTGNTLL

IFLIHREPRLHTPMYFFISQLSLIDLMYICATVPKMLVDQVTGDNTISHL

GCGVQMFSYLTLAGAEVFLLSAMAYDRYAAICRPLHYPLLMNQRICHLFM

SGCWFLGMFDGLLLTPMTMSLPFCQFRRIMNFFCEAPALLKLSCSDISLY

EMFMYLCCVLMLLIPTMVISSSYALILCLTHSINSAEGCRKAFATCSSHI

VVVLLFFGASIYTYMLPRSYHTGEQDMTVSAFYTILTPVLNPLIYSFQNK

DVTGALRNLIRSRMRLRKVLNVKT*

>LoafORs1.59

MKPFIFPLYNPGHFSHVVFSIVNLFRLAWENQTFKSDFILLGIFNHSPNH

IFLFSLVLGIFTVAFMGNTAMVFLIYLDSHLHTPMYFLLCQLSLIDLMAI

CTTVPKMALNYLSGRKSISVAGCGTQIFFYVSLLGAECFLLAVMAYDRYV

AICHPLRYPILMSKKICGLMAASSWILGSFDAIIEVAVALSFSYCGARKI

PHFFCDVPALLPLSCTDTSTFERMIFVCCVLMLLFPIAVIIASYTRVLLA

VISMESGEGRRKAFTTCSSHLMVVGMYYGAAMFIYMRPTSDRSPTQDKMV

SAFYTILTPMLNPLIYSLRNKEVTRAFMKVLREGKSGQ*

>LoafORs1.60

MPNYTIVMEFLLMGFSDVWELRVLHAVSFSLMYFMTLIGNFLIVIVTTLD

KSLHTHMYFFLRNLSILDACYISVMVPNSCVNSLLDSSMISKAGCVTQVF

LVVFFACVEMLFLTIMARDRYVAICQPLHYPVIMNPQACVQMTLASILSG

LVYSGFHTGITFTLPFCQSNIHQVFCDIPSLLKLSCSDTFSNEIIILASA

LVIGGGSFVFIIRSYIHIFSTVLRFPSGTDRAKAFSTCIPHILVVSVFLS

SSFYVYLRPSAISATIQDMVLSVFYSVIPPLFNPIIYTLRNEQIKYAIRK

IIKKKIF*

>LoafORs1.61P

MPNSTMVMDFLLMEFSEVWEIRVLHAACFSTMHLLTLFRNFLIFIVTTLD

KSLHISKYFFLRNLSILGACYISVMVPN*CVKSMLDNSDISKARCVAQVF

LVVFFVYVELLFLTFMAHDRYAAISQLLHYSGIMNPQVCVPMTLASILSG

LLYSGFHTVNTFRLPFCYSNVIHQFF

>LoafORs1.62

MLNSSVMMEYLLVGFSDVWELRVLHALSFSLIYLVTLTGNFLIVIVTTVN

KSLHSPMYFFLRNLSFLDACYISVTVPNSCVNSLLDSSVISKAGCVTQVF

LVVFFAYVEMLFLTFMAHDRYVAICQPLHYPVIMNPQVCVHMTLASILSG

LVYSGFHTGITFRLPFCQSNVIHQFFCDIPSLLKLSCSDTFSNEVIILAS

GLVIGGGYFIFIIRSYIHIFSTVLKFPIGAGRAKAFSTCIPHILVVLVFL

VSSFSLYLRPSAISATNQDMVLSVFYSKFLPYSIQLSTVLEMNK*

>LoafORs1.63

MMAWENQTFDSEFILLGIFDHSPTHIFLFSLVLGIFTVALIENTTMIFLI

YLDTQLHTPMYFLLSQLSLMDLMLICTTVPKMAFNYLSGRTTISVTGCAT

QIFFYASLLSCECFLLTVMAYDRYVAICHPLRYPSLMSLKVRGLMVASCW

ILGSSDGVIDAAATFSFSYCGSREIAHFFCDFPSLLSHACNDTSTFETLL

FICCIVMIVIPVVIIIVSYTRVLLAVIRMGSGEGRHKAFTTCSSHLMVVG

MYYGAALFVYIRPTSDHSPTQDKMVSIFYTIFTPMLNPLIYSLRNKEVTR

AFMKVLGKGKSGE*

>LoafORs1.64

MGWGNESFHFEFILLGIFDHSPTHTFLFSLVLAISAVAFMENTAMVLIIY

LDPQLHTPMYFLLSQLSLMDLMLVCTTVPKMAFNYLSGRKFISLEGCGTQ

ILFYVSLLGAECFLLAVMAYDRYVAICHPLRYTILMNQKLCMLLTVASWI

LGSLDGIIVLAAALSFPYCHSLEIHHFFCDVAALLPLSCTDTSAFERLLF

TCCVVMLILPVSVIIISYSCVLQAVIHMGSGESRHKSFTTCSSHLSVVGL

YYGAGMFMYMRPAPNHTPNQDKMVSAFYTILTPMLNPLIYSVRNKEVSQG

LKKLLGKGSLI*

>LoafORs1.65

MENYNQTSTDFILLGLFPPSKIGVFLFILIILIFIMALIGNLSMTLLIFL

DTHLHAPMYFLLSQLSLVDLNNISTIVPKMASNFLFGIKSISFIGCGVQS

FFFLTLAGAETLLLTSMAYDRYMAICFPLHYPIRMSKKVCVLMITGSWIM

GSINSCAHTAYALHMPYCQSRAINHFFCDVPAMLTLACMDTWVYEYTVFV

STTLFLVFPFIGISCSYGQILLAVYHMPSSEGRKKAYSTCSTHLTVVTFY

YAPFVYTYLCPRAFRSPTEDKVLAVFYTIITPTLNPIIYSLRNKEVMAAL

RRIIQRIVFVKA*

>LoafORs1.66P

ENYKETSTDFILLGLFPQTRIGLFLFILIVLIFLMALIGNLSTILLIFLD

AHLHIAMYFLLSQLSLMDLNCISTIIPKMASNFLFGIKSISFIGYGVQSF

FFLTLVGAEAILLTSMAYNHYLAIRFPLHYPIYMSKKVYVLMITGSWIMG

SVNSCAHTAYALHILYCQSRAINHFFCDIPAMLTLACMDTWVYEYTVFVS

ATLFLMFSFIGITCSYGQILLTVYHMPSSEGRKKAYSACSTHLTVVTFYY

APFAYTYLCPRSFQSPTEGKVLAIFIPCLPPCSTLSP

>LoafORs1.67

MEKRNATSDFILLGLFQHTSFHLFLFIVVLIVAIASLVGNALTILLIHWD

HRLHTPMYLLLSQLSFMDTMLVFTTVPQMASGFLTGKKSISPAECGLQIF

AYPTLGGGECFLLAAMSYDRYVAVCHPLRYNILMNWQLCLRMTLGSWFLG

AADGLVQAVATLSFPFCSAHEIDHFFCEAPSLLRLACADTSVFENVMYIC

CVIMLLVPLFLILISYSLILAAVLHMPSTEARKKAFATCSSHLTVVGLFY

GAAIFTYMRPKSYRSANHDKVVSAFYTIFTPALNPLIYSLRNNEVKGALK

RWLGKCTNLKHQ*

>LoafORs1.68

MMGFENQTSGSHLILLGLFPSSQKSLAFFFFICIIFVMTVTENIVMILLI

HRDLRLRTPMYFLLSHLSFMDILHISNIVPKMIVDFLTRNRTISFTGCGF

QVFLSLTLLGGECLLLAAMSYDRYVAICHPLRYPILMNEQISILMAGGSW

LVGTINSTVHTAYILHFPICGSRAIDHFFCEIPAMLKLSCVDTSHYEGGV

HVSGIIFLVIPFSMIFASYVQVLLTVLQMKSTKAQKKSFSTCFFHMIVVM

MYYGPFIFTYMRPKSYHTPGQDKFLAIFYTILTPTLNPIIYSFRNKDVLA

AMKTMIESNFLPKR*

>LoafORs1.69P

IVFISLMGNALMILLIHMEHRLHIPTYFLVNKFSHMYIMLVFTIMPQNKT

KQQIFFFFCQKWLLTI*LERSLPLLQAVGYRSFSSSPRVAKSSCS*NLRP

MTTMWHCVTHYHIPFS*TGNCALTIAMGSWFLGEADSLMQVVANLSFQFC

KTHEINHFFKEALTLVHLACGNISVFEYVMSICSVLMLLVPFSLILTSYS

LILAAVNHYVLHKPARRPLACAHHTGL*WDSYWAAIFIYMRPKSYKSANH

TKVVSAFYTIFTPVLKHFSYILRKSEVRRALKMCMG

>LoafORs1.70

MEKRNATSDFILLGLFKHTTFHLFLFIVVLTISMASLMGNALMILLIHRD

HRLHTPMYVLLSQLSLMDMMLVFTIVPKMASGFLTGKKSISPAGCGLQIF

VSLTLGGGESFLLAAMSCDRYVAVCHPLRYSILMNWQLCLQMTMGSWFMG

AADGLMQAVATLSFPFCSAHEINHFFCEAPMMVRLACADTLVFENIMYIC

CVLMLLVPFSLILISYSLILAAVLHMHSTEARKKAFATCSSHLTVVGLFY

GAAIFIYMRPKSYRSANHDKVVSAFYTIFTPVLNPLIYSLRNNEVKEALK

RWLGKCTNLKPQ*

>LoafORs1.71

MEKWNQTSNDFILLGLLPPNQTGMLLLFLILLVFFLASLGNSTMMYLICM

DSRLHKPMYFLLGQLSLMDLMYISTTVPKMVHNFLSGHKGISFLGCGFQS

FLFLTMAGSEGLLLASMAYDRYVAICHPLHYPNRMSRRMCVQMIMGSWVL

GSINSLAHTVYALHIPYCQSRAIDHFFCDVPAMLLLACMDTWVYEYMVFV

SVTLTLLLPFLGTTASYGRVLLAVYHMRSKEGRKKAFSTCSTHLTVVTLY

YAPFVYTYLRPRNVRSSAEDKILAIFYTILTSMLNPIIYSLRNKEVLGAM

KRVFGVFFSEKK*

>LoafORs1.72P

MEKWNQTSNDFFLLGLFPPNQTGMLLLFFIILVLFLASVGNSAMIHLIHV

DPRLHSPMYFLFSQLLMDLMYISTIVPKMALDFLSCQKGISFLECGMQSF

SFLTMACSEGLLLASMAYDH*VAICHPLHYPSCISRSTSVQMIIRSWILG

SINSLAHTAYILHIPYCWFRVIGHFFCDVPAMVSLACVDTWVYECMVFVS

TSLFLLLPFLSLTASYGRVLLAVYHMRSKEGRKKAFTTCSTHLTVVTFDC

APFVYTCLRPRNLRSPVEDKILAIFYTILT

>LoafORs1.73

MEKWNQTSNDFILLGLFPANQTGILLSFLTILVFFLALLGNSTIIYIICV

DPRLHTPMYFLLSQLSLTDLMYISTTVPKMVHNFLSGQKSISFLGCGFQS

FFFLTTGGAEGLLLASMAYDRYVAICHPLHYPNRMSRGMCVQMIIGSWIL

GSINSLAHTAYILHIPYCQSRAIDHFFCDVPAMVSLACMATRLYEYMVFV

STSIFLLLPFLGITASYGRVLLAVYHMRSKEGRKKAFTTCSTHLTVVTLY

YAPFVYTYLQPKNLRSPAEDKILAVLYTILTPMFNPIIYSLRNKEVLGAM

TRVFGIFSSKKE*

>LoafORs1.74

MEKRNRTSNNFILLGLFLPNQTSMLLLFYIILVFFLALVGNSTMIYYICL

DSHLHTLTYFLLSQLSLMDLNCISTTVPKMVFNFLSGHKGISFLGCGIQS

FLLLTMANSEVLLLASMAYDHYVAICHPLCYPNLMNRRTCVQMIIASWIL

GSINSLAHTVYALHILYCQGRAIDHFFCDVPAVLPLACMDTWAYEYTVFV

STSLCLLLPFLGITAFYGRVLLAVYHMCSKGGSTKAFTTCSTHLTLVTLY

YAPFVYTYLRPRNLCSSAKDEILAFFYTILTPMLNPIISSLRNKEVLGGH

EKSVWSILFQEKIVMALLIALFFFLFHVEKNILVLFNRNIIEDTHIILTF

IVYTLETLVAKGQQFEFIQVLLGNSMEQFYFVL*

>LoafORs1.75

MEKWNQTSNDFILLGLFPPNQTGLLLLLLIILVFLLALMGNSTMIHLICT

DPHLHTPMYFLLSQLSLMDLMCISTTVPKMVYNFLSGHKGISFPGCGTQS

FLFLTMAGSEGLLLASMAYDRYVAICRPLHYPNLMGRKMCVQMMVGSWIL

GSINSLAHTVYALHIPYCRSRAIDHFFCDVPAMLPLACMDTWVYEYMVFV

STSLFLLLPFLGITASYGRVLLAVYHMHSKEGRKKAFTTCSTHLTVVTLY

YAPFVYTYLRPRNLRSPAEDKILAFFYTILTPMLNPIIYSLRNKEVLGAM

TRVFGIFSSNKE*

>LoafORs1.76

MENRNATSDFILLGLFQHTSFHLFLFIVLLTIAIASLMGNALMILLIHRD

HRLHTPMYLLLSQLSFTDTILVFTIVPKMASGFLTGKKSISPAECGLQIL

AFLTLGGGECFLLAAMSYDRYVAVCHPLRYNILMNWQLCLRMTLGSWFLG

AADGLVQAVATLSFPFCSAHEIDHFFCEAPSLLHLACADTSIFEHVMYIC

CVVMLLVPLFLILTSYSLILAAVLHKSTEARKKAFATCSSHLTVVGLFYG

AAIFTYMRPKSYRSANHDKVVSAFYTIFTPALNPLIYSLKNNEVKEALKR

WLGKCINIKHQ*

>LoafORs1.77

MHLENHTVTEFILLGLLQYTPAHFCLFALFTMMFLVTLIGNSLLILLILV

DPHLHTPMYLFLWQLFLIDTLFTLAVVPKMLIDYLLHRTVTSVSGCGIQI

FLGLGLGGTECILLGLMSYNNYVAIYKPLHYPLIMNWPFGQQIAVSSWTS

GSIDALIYTVYITSFHIWGNREIHNFYCEHPGVLRLSCEDTLSYETGELI

STTILLVIPFSVILASYLLILITLIQMASTEGQKKAFSTYSSHLTVVSLY

YGATIFIFKMSKSLPTLIFAHNSSHSESITFPHFVAVVRCR*

>LoafORs1.78P

FNLLELFSSSQTSLVFFFITCIVFVMTVTENAVMILLIHRDL*LHTPMYF

LFSHFSFIDILHISNIVPKIVADFLSGNRTISFAGCASRYFSPSFS*V*V

LPPSSNLL*SLCCHLSPTELPHSYG*DVQHSHG*CILLVGTITHRFNKLM

ALPFSAHSIDHFFCKVPSHAEVGLCRQITLGKRCLCKWYHLPGHTFFHDL

CFLYESSPYRPPDEIITTRKKSFSTCSFHMIAVMIYYGPFIFTYMRSKSY

HTPGQNKFLRIFYIILTPTLNPIIYSFRN*DVLAAMKTMLESNFLPKR

>LoafORs1.79P

SPVYFFLKNLSLIDMCYISVTVPKSIMNSDYQLFNFLPRMCLMGFFFFL*

CFFVGTEYALLIVISYDCCGASCHPLYYETVMNRGVCVQMGCSGCVYGSI

HAASTLSVNFCGPKVVHRFFCDSPSLFTLACSGEHILEHSFIIAGCCFAF

VCFILMAVSYVHIFSSVLRIPFTQGRYKTVSTCMSHLTVVTLFLSSGFMG

FLGSASESPSSVNLFMSVLYSLLSPTLNPVVYSLRNRNIKIALSKILHGK

MALK

>LoafORs1.80

MPEERANTTIIMEFLLVGFPDDWMLQRMYATLFFLIYLTALMGNLLIITL

TTTDGRLHSPMYFFLKNLSLIDICYISVTVPKSVVNSLTKSHSISFLGCA

SQIFFLIFFAGTEYALLIVMSYDRYTAICHPLHYETTMNIGACVQMVTAS

WLSGCVYGSIHAAGTFSVDFCGPKIVHQFFCDVPSLLTLACPGEQILEYA

FIIASFSFAFLCFLFIITSYIHVFSAVLRISSAQGKFKTVSTCMPHLTVV

ILFLFSGLVTHLGTNYKSTSSLNLLMSVLYSMLPPILNPVIYSLRNEDMK

LALGKLLGGKMLPKT*

>LoafORs1.81P

MYEKFTNMTIMMEFLLMGFPVDWVIETLHAALFFLIYLAPLIGNLLIFTL

TIVDQHLQTPMYFFLKNLSLIDIFYISVTVPKSIKNSLTNSYSISFLGCA

LQLFLVIFFRGTELALLVVMSYDCYVALCHPLHYETLMNRCACL*MVTAL

WLSGCGYGAIRVAGTLSVNFCGPNVVHRVFRDVPSLLILTCSGEYILE*A

FIIVSCFFFVCFILMVVSYIHIFSTFLRIPSANGRVKTLSICMPHLTVET

LFLFAGSITYLEKNFNSSFSLKMLISVLYTVLPPTLNPLIYSLRNKDMQM

ALEKLIAGKIL*IF

>LoafORs1.82

MDVTNQTTVREFIFLGFSAVPQLRLTLFVVFLIVYLLSLVGNTLIIFIVL

MDSALHTPMYIFLGNLSFLEIWYTTATVPKLLATCLSQIVTISISGCITQ

YYFFFSMGATECILLAVMGYDRYLAICNPLRYSLLMSLQICLWFSAGSWI

GGFIAPLLPTILISYLNFCGPQKINHFFCDSDPIFKLSCSDTFFAEALGY

TCSSVVILSSFLLTMSSYGHIMLTIIRLSSREAQKKTFSTCASHLTVVSI

YYCTIIFAYVRPPAKYNFTIGKVVSVFYCVVTPLVNPFIYTLRNKDVKKA

FRKTLAQKRLLWDRNIQDF*

>LoafORs1.83P

VANLTMVTEFILMGFSDTEELQILHAILFLLIYMTALMGNILIITLTSLD

QCLSTPMHFFLKHLSFLDSCFISVTVPKSIINSIMHTRSISFLGCATQLF

LILYLAFSELVL/LTVMAYDHFMAICHPLHYEVIMSRKFCVQLAAASWLS

GGIGGDMYTSITFSLLSVASS*NNFSVMSLP*RRSHVSVCILLKLL*MLL

FFFLALECFISIIVSYTYIFLAVLKIPSARRSKVFLTCLPHLLVMTLFFS

TGTTPYLILESDNPSIQDLLLSVFYTVVPPTLNPVIYSLRNKDIKDALRK

IL

>LoafORs1.84P

FWGITIQSMTYAILSLLIHVVALMRNILIITFISFDQCLSTPAYLFLKQL

SHLDICFISVSVPKSVNNSITYTRSISFLGCTTQSFLDLYLAFSELVLLI

LMAYDHYLAICHPLLYEAVMNRNFCMYLVVASLLSEGIGGGMYTSHHLLI

NLL*LLHTTIFCDVPPLMKT*CTGTHIAKTITTVILFFIGLGMLCFHDIL

VVVSRHRVSSDS*LPGAQ

>LoafORs1.85P

MKMIGFMKKLNKTNFLEFILVGFSDDPAQKPVLFSLLLFIYLTTMIGNLF

IILTIVSNAHFHSPMYFFLGNLPLIDLCLSSTTVPKMLADIQSGNSTISF

NGCLIQMYTFICFSGLETLVLPIMSYDRFVAICLHLSYLAIMTPKFCALL

VVISWIFAIFSAQIHTILLVQLSFCEDNKIPQ

>LoafORs1.86P

ISALFPSPFPNPSQTLWLITTPSHFLAVSQVFFFFLLATSEVSLLTMMSF

DGYIAICYPLRYEIIMSHGACVQMATSS*VSGVLIATLHTASNFSMPAYG

SPKFHQFFCDVPQLLSLTCPYHTVEFIVIGLSMVLDFGCFAFIDISYI/L

LRISSGEGRSRAFSTCLPHLTVVTLFLFSSFSFSCL*PLPKFPSPLALLV

SVFYTMVPPTMNPLIYSLRNKGMKMALKKVLKSRHCPSN

>LoafORs1.87

MERGNVTFISEFVLLGLSSSAEQQHLLSVLFLCMYLVTVSGNILIILAIA

SDSHLHSPMYFFLSNLAFVDICFTSNIVPQMVVNGLTGTKTISFSGCLTQ

LFFFISFVNMDSLLLCVMAYDRYVAICHPLRYTTLMNPHLCVQLVAGLSV

VTYLHAFLHTALIARLSFCASNVIHHFFCDLNMILQLSCSDISFNVMVIF

TEGILLALTPFICILISYGFIFSAILKITSSEGTQRAFSTCGYHLSVVVL

FYGTASAIYFSPSSSHTPERDTLSAIMYTYCGDSDAESFHLQSKE*

>LoafORs1.88P

MERGNLTLIGPFVLGLSSSAEQQHLLSVLFLCMYLVTVSRNILIILAIAS

DSHLHFPMYFFLSNLAFVDIYFSSSTVPQMIVNGLTGAKTISF*GCLTKL

FF/ISFVNMDSLLLCVMAYDRYVTICYPLHYTTLMNSHLCVQLVAGLSVV

TYLYALLHTALIACLSFCASNIIPYFFCDLNSLLQLSCSDISFSVVVIFT

VGSLLALTPLICILISYGFIFSTILRITSTQGKQRAFSTCGYHLSVVVLS

YGTASTFSFSLSPFSFHIPERDTLSAIIYTMVTTLLNPFIYSLRNKDMKR

ALQKIFCKGRVF

>LoafORs1.89P

MTNLTVLTEFVLMKFSTNEIMCILHSVLFLALMGNAFNHDHDFGLVPPHF

HVLFLEGFILLGSQPHLVTISKSIINPLTQNNSVSFLGCVIQGFLVLFST

PVELFLPIAMSFDCYAVIFHLLHYDVIMNRGMCLQMAAVFWPCGYLIAVM

HTGGTFLSSISSVAFPAVSYFLLRKFIKRNCALPQ*CGDRFLLFYFHYHL

LCLHLLHCQEDSINRGPVKSLFHFSSTPGYYCIICFHLISYVRPTSESTS

ISNLIIIIFYT

>LoafORs1.90

MQITPLRMNNISAVTEFLLVGFSGPWKLQLLQAGTSIVIYLAALMENGLI

ITITSLDPCLRKPMYFFLRYLSLFDLCLISAVVPKAIINSLTHSNYISFL

GCVIQLFLVIFSATTELFLLTAMAIDRYAAICHPLHYEVIMNRAKCVQMA

SLSWLSGGLICVIHTAVTFSLSYCGVSEIQQFFCDIPQLLAISCSEYIFA

EIALILINAVLDFCCFVCIIISYICIFSTVRKIPSIEGQSKAYSTCLPHL

AVVVLFLSTAFGAYLKPILGSASFNDLILSALYIVLPPSLNPIIYSLRNE

AMKVGLEKLITTKLLTKKNLLIFLQE*

>LoafORs1.91

MGNWTLVTEFILVGIPTTRKLGGLLFLIFLLAYLMTVLGNTLIITLIIVD

YRLQSPMYFFLSNFSFSEILTTTSAVPKMLSAFLSEKKSISFGGCSAQSY

FYFLSGCTEFILFAVMSYDRYVAICSPLQYPVIMTSSLCVRLVILSWVGG

FLLILPSTVLKAGLPYCGPNVIDHFFCDSGPLLHLACADIRVIELLDFLS

SLVLLVSSLSLTMVSYVYIISTILKIPSGQGQRKAFATCASHFTVVCMGY

GISIFVYVHPSQKSSLRLNKILFILSSVITPLLNPFIFSLRNETMKDALK

DTLAKGGDFLKGLRSI*

>LoafORs1.92

MGRWSNQTTGNDFVLLGLFHRNQAPKLIFAVIFLVFLMALVSNAVMMILI

WLESRLHTPMYFLLSQLSFMDLLYSSTFFPKIAIDFLSGKNTISFIDCGI

QLFLFMTLVGAECLLLAVMSYDRYVAICHPLHYSILMRPAVCGFMVVGSW

LGALLNALIHVLYTLNLSYCASREIHHFFCEIPALLKLVCGDTFLYENGL

FVSAVVFLLIPISAIMASYGKIVTTVLGLGSTMGIKKALATCSSHMIVVS

VFYGTAIMKYFLPKAYHTAEQDEVVSVFYTIVTPMLNPLIYSLRNKEVAG

ALKKVLQR*

>LoafORs1.93

MKTENQSFGAEFILLGLFQYGQMNTVFFVAISIFFSVALLGNIIMICLII

LDFRLHIPMYFLLSQLSFIDVMYISTTVPKMAANFLSNSKTITFLGCEIQ

TFVFLTLGGTEALLLGFMSYDRYVAICHPLHYPVLMTKTICLSMVTCAWA

SSSINALIHTLYVFQLPFCRSRLINHFFCEVPSLMPLVCQDTSQYEYTIL

FSGLIILLLPFMAILASYARVFIVVYQMSSGKGQTKAVSTCSSHLIVVSL

FYGTGISTYMRPHSLHNSEQDKVVAVFYSIITPLLNPFIYSLRNKEVMGA

MKRLIG*

>LoafORs1.94

MGNCSETSTDFILLGLFPPSRIGLFLLILIILIFLMALIGNISMIILILL

DTHLHTPMYFLLSQLSLMDLNYMSTIVPKMAYNFLFGNKSISFIGCGVQS

FFFLTLAGAEALLLASMAYDRYVAICFPLHYPVRMTKSVCVLMTTGSWIM

SSINACAHTAYALHMPYCQSRTIDHFFCDVTAILALACTDAWVYDYIVFV

CSTLFLVFPFIGITYSYGRVLLAIYCMPSSEGRKKAYSTCSTHLTVVTLY

YAPFVYNYLHPRSFQSPTVDKVLAVFYTVLTPMFNPVIYSLRNKEVMRAL

RKVTQRIFSVKM*

>LoafORs1.95

MEHKNKTKITEFILLGFQNDKEVEILLFVVFLLMYMTSLIGNTMIILLVC

VDYRLYSPMYFFIANLSFLEVTITSTVVPKMLANTFSLSKVISFAGCLTQ

SFFYFLLGSTEFFILAVMSFDRYVAICNPLRYTIIMNKQTCMFLLLGSYV

GAFLSILVSSILTAPLPFCGTNVINHFFCDSAPVLKLACADISLVELADF

ISSAVLLLGSLLLTGVSYTYIVVTILRIPSVQGQQKAFSTCVSHITVVTL

YYGSSIFIYVRPEKGNVMDVNKFATVLNTVVTPMLNPFIYSLRNEKVKES

LRDVFKKYVGRLTNLSSQK*

>LoafORs1.96

MDHKNKTRVTEFILLGFQNEKEVEFFLFAVSLLMYMTSLIGNTMIILLVC

VDYRLYSPMYFFVANLSFIEVTITSTVLPKMLANTFSLTKAISFVGCLTQ

SVFYFLLGSTEFFILAVMSFDRYVAICNPLRYTIIMNKQTCVFLLLGSYV

GAFFSMLGLSVLTAPLIFCGPNKIHHFFCDRAPVLKLACTDISLAELADF

ISSAVLLLGSLLLTGVSYTYIVITIFRIPSVQGRQKAFSTCVSHITVVTL

YYGSSIFLYVRPNKGNAVDINRFATVLNTIVTPMLNPFIYSLRNEKVKEA

LRDAFDKCIGRLTNLSSQK*

>LoafORs1.97P

GGLLFLIFLLTYLVTVLGNTLIVTLIIVDYRLQSPMYFFLNNFSFSEILT

TTSAVPKMLSGFLLERKSISFDGCSAQSYFYFLSGCTEFTLFAVMSFDLC

EAIYSPLQNPLIMTSSLCICLVILSWVGGFLLIPPSTILKAGLPYCGPNM

IDQFFL*QCSSPP

>LoafORs1.98

MDKMGQQNSSTITELVLIGFSNHPQAEIPLFFLFSLIYLVNLFGNTAIIT

LVVFDSFLHTPMYFFLCHLAFLNLYFSTLVVPKMLFNFIVTRKVISYNFC

LAQTYITLFLEATECFLLAVMALDRYVAICYSLRYLIVMNWSVCLALSLG

AWTLGFFASVVPLYFIILPLCGPYIVDYIFCELPILLHMFCGDTSLDETM

MVAGGAGTVLFPFLLIIFSYLHILLAVMRIDSAEGRKKAFSTCTSHLTVV

TIYYGTGLVRYMRPKSLYSAEGDKLISLFYAVINPMINPFIYSLRNKEVK

GAMGRVMERYKKSQQITD*

>LoafORs1.99P

MMDGTNDSSQNHFILLGSSDHPHPERILFVVILITSVLTLMGNTTTILVP

WLDPHLHTPMYFFLTHLSFLDLSFTTVYNLSGCDKTISCTGYGIQLFLFP

GLGGIDNLLLDVMAYDRFVAVCKPLHYMIIMRP*LFLGLVFLAWGCGVAN

SLTLWSSLCGYHIVNNLLCEMSALIRMLRVNTAAIEGIAFILAVGIVLSP

SAFILVSYGYIVKSVLSIQSSSGRHEDLNICGSHFTVISLLYENIIYMYI

QPGISSSKDRGKFLTFFYNIVAPLLNPLIYTLRNKEVKGELRRLMMGKRG

IGK

>LoafORs1.100

MSATKMTPENSSTVTELVLIGFSNHPQAEIPLFFLFSLIYLMNLFGNTAI

FVLVVIDSCLQTPMYFFLCHLAFLNIFYTTAVVPKMLLNLLASKKVISYD

LCLAQTYISLLMGAAECIILAVMALDRYTAICYPLRYLLIMNWSLCVQLS

AGAWTISFFVSVVPLYFTIVPICGPYIIDHIFCEVPVFLHMICNDTSLQE

IVMVIGASGTLLLPFLLIVLSYLRILVAVIRMHSAEGRKKAFSTCSSHLT

VVTIYYGTGMFMYMRPKSVYSAEGDKLISLFYAVINPALNPLIYSLRNKE

VQGAMQRALERWKVFQRQNILP*

>LoafORs1.101

MQRENWTIVTEITLPGILTTRALGGLLFMFFLFTYLVTVLGNALIITLIF

ADHRLQSPMYFFLSNLSFSEILTTTSAVPKMLAGFLSERNSLSFGECFTQ

SYFYFLSGCTEFILFAVMSYDRYVAICSPLQYPVIMSGSLCVRLVILSRV

GGFLLILPSTILKAGLPYCGPNVIDHFFCDSAPLLHLACADIHVIELLDF

LSSLVLLISSLSLTVVSYMYIISTILKIPSGQGQRKAFATCASHFTVVSM

GYGISIFVYVRPSQKSSLHLNKILFILSSVITPLLNPFIFSLRNETMKDA

LKDTLAKGHKFLKQMSDRIFENHPKLRYSQPYRG*

>LoafORs1.102P

NISIATEFQLLEFPNLLEWQTLLFAIFLIIYFLRIMGDVIITVVSQDQQL

HLTMYMFPKRLSFPEIWYTSTIVLLLLANLLSRGQVISFSACMAQLYFFV

FFGATECFFLAMMAYD*NLAICSPLHYPFLKSPEICAKLVAISWLTGVGT

GFLPSLMISKLKFCGPSQINHFFCHLPPLMQLSCSRIYITKLLILVLSVA

VLCICFLLTLVSYIFIVSSILRIPSASGWPKTFSTC*SHLAVVTIYYGTM

ISMYVYPNARLSPVINKIISVFYIVVTPLLNPVIYGLRNKDFNEAIRKVM

RRKCGIYAVRVKGSVFIR

>LoafORs1.103

MMDGTNDSSQSHFILLGFSDRPHLERTLFVVILIAYLLTLVGNTTIILVS

QLDPHLHTPMYFFLTHLSFLDLSFTTSSIPQLLYNLNGCDKTISYTGCAI

QLFLFLGLGGVECLLLAVMAYDRFVAICKPLYYMVIMNPRLCLGLVLVAW

GCGVANSLVMSPVTLHLPRCGRRHVDHFLCEMPALIRMACINTVAIEGTV

FVLAVGIVLSPLVFILISYGYIVRAVLQIQSASGRQKVFNTCGSHLTVVS

LFYGNIIYMYMQPGNKSSQDQGKFLTLFYNIVTPLLNPLIYTLRNKEVKG

ALRRLLLGNREVGKG*

>LoafORs1.104P

MGRWSNHTTGTLFSWGCPTTSKPPSLSLLSSSCYSSWPLLAMLW*RFSFG

WTVDCIFLCTFF*ANFSSWTSCTAPLLDPK*PLTFCLGRMPFLLWIVEFS

HSFSRPFPAAECFLLAVMSYDRYVAICHSLH*SILMHLAVCGFMVVGTWL

SAPLSALIHVLYILNLLYCASREINLFFFRDTSFPATCLC*HCSL*EKFF

FSGVVFLLIPISAIMASYGQILTTILEVGSKL*SKKALATCSSHTIVVSF

FYGTAIMKYFLPKAYHTTEQDEVVFVFYTILTTVLNPLIYSLQNKEVAGA

LRKVLER

>LoafORs1.105P

MENANDSTGINFILLRLFSDTQIHLFLFAVVLMIFITSLMGNGLMIILIH

VDPQLHTPMYFLLS/LSHMGMLLVSTIVPKMAANYLTGTRSVSPTGFGAQ

IFLFLTLGGGACFLLEAMSYDRYVAICHPLCYPIFMSQRLCLLLTAGSWL

LGRVDRLMQAGATLSFPYCHSREINHFFCEAPSLVCLACVDTMIFEFFMY

VYCILMLLIPLSLILASYNLILAAVLCLHSAAAQKKVFTTCSSHLAVVGL

>LoafORs1.106

MSCQNNQTSRSDFILLDLFLGTQAPWVLFTFTVLALLVALFGNTTIIILI

RADSRLHSPMYFLLSQLSIIDFLYISTFVPKMALAFLSGNHHISFIGCGA

QLFLFMTLVAAECLLLAAMAYDRYVAICHPLRYSIFMRPLICTLLVVGSW

LGALLNALIHVVYTLTLPYCISREIHHFFCEIPALLKLVCVYTSQYEKSL

FVSGVIFLLSPISAIMASYGKILSTILRTGSNVSLRKTLATCSSHVTVVS

LFYGAAIIKYLLPKSYHSPEQDVVVSVFYTILTPVLNPLIYSLRNKDVTR

ALRKVLKK*

>LoafORs2.1P

DLRNGSTVSDFILVGFEQSSPSTRSLLFALFLALYSLAMAMNGLIIFIAG

TDPRLNSPMYFFLGHLSFLDVCFITTTIPQMLIHLVVKNHTVSFASCMTQ

MYLVFCVGVAECILLAFMAYDRYVAICYPLSYTQIMGRQVCVRLVGTAWS

FGLINGIFLEYMSFRNPFCRDNHIENFFCEAPIVIALSCGDPQFSMKVIF

VDAIVVLLSPMVLIVISYARILASILSRASSSGRGKTFSTCASHLTVVIF

FYTSAMFSYMNPRSTHGPDKPFSLLYTIITPMCNPIIYSFRNKEMKGAMV

RALGRTSLAQAESV

>LoafORs2.2

MMDLGNGSTVSDFILMGFEQSSPSTQALLFALFLALYSLAMAMNGLIIFI

TGRDPRLNSPMYFFLGHLSCLDVCFITTTIPQMLIHLVVKNHTVSFTSCL

TQMYLVFGVGVAECILLAFMAYDRYVAICHPLSYTQIMGRQVCVRLVGTA

WSFGLINGILLDYMTFHGPFCRDNHIENFFCEAPIVITLSCGDPQFSLMV

IFADAIVVLLSPVVLIVISYARILASILSRASSSGRGKTFSTCASHLTVV

IFFYTSAMFSYMNPRSTHGPDKDKPFSLLYTIITPMCNPIIYSFRNKEMK

GAMVRALGSTSLAQAESV*

>LoafORs2.3P

MKNVSTITEFVLLGLSSDSQVQTLLFMMFLVIYLLTLLGNVVMILVIRVD

SHLHTPMYSFLGHLSFLDLSFSSVTVPKMLQNFLSQKKNISVWGCITQSF

FFTLSGGTEACLLSAMAYDYYAAICYPLVYTMVMNRPFCSVIVSTIWAVG

FLISFINSLFIHNLHF/FCGPNIIPHFSYELPPLFLLSCTDPTANEILLA

MLCAFMGLLTLPLILFSYSRIISAILSIHSRKGQGKAFSTCSLHLTVVFL

FYGTTLF*YLSPTLGFMLEQVVSIQYSVITSLLNLINYSLKNKEVKVALQ

RMLRQQMFSS

>LoafORs2.4

MLFVLFLVIYLLTLMGNLMMLLVIRGDSHLHTPMYFFLGHLSFLDVCYSS

VTVPKMLQNFLSQKKTISVWGCITQGFFFILSGGTEGCLLSAMAYDHYAA

ICHPLLYPVVMNRPLCTATVSAAWAIGFLNSLVNNLCIRSLQFCGPNIIP

HFSCEQPSLFALSCTDPTANTILQAGFAAFLGLVTLSLILFSYSKIMFAI

QTISSSGGQSKAFSTCSSHLTVVLLFYGTALFRYISPPSGSVLGRVVSIQ

YCVITSLLNPLIYSLKNQEVKAALQRVLRQQICVSG*

>LoafORs2.5

MEFMNNLTVFTEFILLGLSAKPYLQVLLFVLFLLIYLLTLLGNLVMILVI

RADSHLHTPMYFFLGHLSFLDLSFSSVTVPKMLQHFLYLKKSISVWGCIT

QSFFLTLSGSTEACLLSAMAYDRYIAVCHPLLYTVVMNRPLCTAMVSAAW

GMGFLNSLINNLFSRKLHFCGSNIISHFSCELPSLFLLSCTDPTANKLLL

SGSTTFLGLLTFPLIIFSYSRIISAILSIPSSGGQGKAFSTCSSHLTVVL

LFYGTALFRYISPPSGSLLERVVSIQHTVITSLLNPVIYSLKNQEVKAAL

QRMLRQKMSSSEEGISVWCSVREWGEGIFRNRNTF*

>LoafORs2.6

MGNHSVFSEFILLGLSSDPQTQALLFLLFLVIYLLTLMGNLVMLLVIRAD

SHLHTPMYFFLGQLSFLDLCHSSVTVPKMLENLLCESKTIFVQGCLAQAF

FVFATGGTEAFLLAVMAYDRYVAISSPLLYGQVMSNQLCVGLVWGSWGLA

FVDALINILLAVNLDFCEGQTIPHFSCELSSLFPLSCSDTSINFTLLLCS

SVLHFFGTFVLIFFSYTRIVSTIMNISSTSSRSKAFSTCSSHLTTVIFFY

GSGFLSYLLPTSGSPLEMIFPLQYSVVTPMLNPLIYSLQNKEVKAAMRRM

FRKYINSFT*

>LoafORs2.7

MKNFSAISKFILLGLPTDRHIQAILFVLFLLIYLLTLTGNFLMLLVIRAD

SHLHTPMYFFLKQLSFLDLCHSSVTVPKMLQNLLYESKTIFVQGCLAQAF

FVFATGGTEACLLAVMAYDRYVAISSPLLYAQVMSNQLCVRLVWGSWCLA

FVDALINILLAANLNFCEGQTIPHFSCELSSLFPLSCSDTSVNFMLLLCS

SVLHFFGTFIMIVSSYARIVSTIMSITSTSSRSKAFSTCSSHLATVIFFY

GSGFISYLLPTSGSPLEIIFSLQYSVITPMLNPLIYSLQNKEVKAAMERM

FRKYFHPLM*

>LoafORs2.8

MKNHSAVSEFILLGLPIDPQIQTLLFVLFLVIYLLTMMGNLMMLLVIKAD

SHLHTPMYFFLGQLSFLDLCHSSVTVPKLLENLLSEKKTISVEGCLAQVF

FVFATGGTESCLLAVMAYDRYVAISSPLLYGQIMNMQLCAGLVWGSWGLA

FLDALINILVALNLNFCDGHNIHHFSCELPSLYPLSCSDISASFTALLCS

SLVHFFGNFLLIFFSYVRIISTIRSISSTTGRSKAFSTCSSHLTAVSFFY

GSGLLRYLMPNSGSTQELIFSLQYSVITPMLNPLIYSLKTRSEGSSEKNM

RNVSSVLNNRLHVRMMRKLGITAICSAWILWRILQYRNLQDKLHLLFLKR

IF*

>LoafORs2.9

MALRNHSTITEFIILGLSADPKIQALLFVLFLGIYLLTMLGNLMMLLVIR

TDSHLHTPMYFFLSHLSFIDLCFSSVTMPKMLENLLSQKKSISVRGCLAQ

IFFVFITGGTEICLLSVMAYDRYAAICHPLLYGQVMSKQWCAQLVWGSWG

LGFLDTVINVPLAMKMDFCDTYIIPHYSCELPSIFLLSCSDVSTNFLVML

CSTIPHALITFLSIFFSYICIIFTILSITSTSGRNKVFSTCSSHIAAVIF

FYGSVFLRYFIPTSGSSLKLIFSVQYSVITPMLNPLIYSLKNKEVKAAVR

RTLEKYLQYVQWQNKGKG*

>LoafORs2.10P

MALRNHSTITEFILLGLSADPRIQALLFVFFLGIYLLTMLGNLMMILVII

TDSHLHTPMYFFLNHLSFIDLCFSSVTVPKMLENLLSQKKAISVRGCLAQ

IFFVCITGGTEICLLSVMAYDRYAAICHPLLYGQMMSKQRCVQLVWGSWG

LGFLDTVINVPLAMKMDFCDIYIIPHYSCELPSIFLLSCSDVSTNFLVML

CSTIPHALITFLSIF/FFSYICIIFTILSITSTSSRSKAFSTCSSHLTAV

IFFYGSVFLRYFIPTSGSAFELIFSVQYGVITPMLNPLIYSLKNKEVKAA

VRRTLAKYLPCFQWQNKEKG

>LoafORs2.11P

TALTKFILLELSADPQIQPLLFVLFLGIYLLTLLENLMMLLVIRTDSCLH

TPMYFFLSHLSFTNLCFS*VTLPKVWENLLSQKKAISARGCLPQIFFVCI

TGGTEICLLSVMACDCYAAICHPLLYDQMMSEQQCIQLVWGSWGLGF/FL

DTVIGVPLAMKMDFCDTYIIPYYSCELPSIFLLPCSDVSTNFLVILCSTI

PHALITILSIFFSYICIIFTILSITSTSGRNKNFSTCSSHVTAVIFFYGS

VFLQYFMPPSGLPLELISVQY

>LoafORs2.12P

MALRNHSTITEFILLGLSADPKIQALLFVLFLRIYLLTMLGNLMMSLVIR

ADSHLYSPMYFFLSHFSFIDLCFSSVTLSKMLENFLSQKKTISVRSSVAQ

IFFVFITGGTEICLLSVMTYDCYAAICHPLLYGQMMSKQRCVQLVWGSWG

LGFLGTVINVPLAMKMDFCDTYNIPLYSCELPSIFLLPCSDVSTNFLVIL

CSTIPHALIIILSIFFSYICIIFTILSITSTSGRSKTFSSCSSHLIAVIF

FYGSVFLQYFMP

>LoafORs2.13

MASRNHSTITEFILLGLSDDPKIQALLFVLFLGIYLLTMLGNLMMLLVIR

TDSHLHTPIYFFLSHLSLIDLCFSSITVPKMLENLLSQKKTISVKGCLAQ

IFFVLITGGTEICLLSVMAYDRYAAICHPLLYDQMMSEQQCMQLVWGSWG

LGFLDTVINAPLAMKMDFCDTYIIPHYSCELPSIFLLSCSDVSTNFLVML

CSVIPHGLTTLLLIFFSYVCIIFTILNITSTSSRNKAFSTCSSHLTAVIF

FYGSAFLRYFMPTSGSPPELIFSVQYGVITPMLNPLIYSLKNKEVKAAVR

RTLGKCLQCFQW*

>LoafORs2.14P

MASRNHSTITEFFLLGLSADPKIQALLFVLFLGIYLLTMLGNLMMLLVNR

TASHFHSPMYFFLSHLCFSSVTVPKMLENLLSQKKATSVRGCLAQIVFVF

ITGGTEACLLSVMAYDCYAAICHPLLYGQVLSKQWCVQLLWGSWGLGFLD

TVINVILAKKMDFCDTYIIPHYSCELPSIFLLSCSDVSTNFLVMLCSIIP

HGLTTFLLIFFSYVCIFTILSITSTSGRSKAFSTCSSHLAAVIFFYGSGF

LQYFMPSSGLALESIFSVQYGVITPILNPLIYSLKNKEVKAAVRRTLGKY

LQCLQW*NK

>LoafORs2.15P

ALRNHSTITEFILLGLSADPKTQALLFVLFLGIYLLTMLGNLMMLLVIRT

DSHLHTPMYFFLSHLSFIDLCFSSVTVPKMLENLLSQTKTISVKGCLAQI

FFLLATGGTETCLLSVMAYDRYAAICHPLLYGQVTSKQQCVQLVWGSWGL

GFLETLINVPLAMKMDFCGNYTIPHYSCELPSIFFLSCSDVSTSFLIMFC

SVIPHGLITFLSIFF/FFSYVRIIFTILCITSFSGRNKAFPTCSSHLTAV

VFLYGSVFLRYFMPTSGSLLELIFSVQYSVITPMLNPLIYSLKNKEVKAA

LKRTLGKYLQCFQ

>LoafORs2.16

MASRNHSTITEFTLLGLSPDPKIQALLFVLFLGIYLLTMLGNLIMLLVIR

TDSHLHTPMYFFLNHLSFIDLCFSTVTVPKMLEDLLCQKKAISVKGCLAQ

IFFLLATGGTEICLLSVMAYDRYAAICHPLLYDQMMSEQRCVQLVWGSWG

LSFLDTVINVSLAMKMDFCDTYIPHYSCELPSIFLLSCSNVSTNFLVMLC

SIIPHGLITLFLIFFSYVCIIFTILSITSTSGRKKAFSTCSSHLTAVIFF

YVSTFLRYFMPTSGSPLELIFSVQYGVMTPMLNPLIYSLKNKEVKAAVRR

TLGKCLRRFQW*

>LoafORs2.17P

SRLHTPMYFFLSHLSFIDLCFSSVTLPKMLENLLSQKKTISVRACLVQIF

LVLITGGTEICLLSVMAYDHYAAICHPLLYGQMMSKQWCVQLLWGSWALD

FLINVPLAMKMDFCDTYIIPHYSCELSSIFLLSCSDVSTNFLVMLCSTIP

HGLITFLSIFFSYIRIIFTILSITSTSARNKVFSTCSSHLTAVIFFYGSG

FLRYFMQASGSPLELVFSVQYSVITPMLNPLIYSLKNKEVKAGVRRTLGK

YLPCFQ*QNKEKG

>LoafORs2.18

MALRNHSTITEFILLGLPADPKIQALLFVLFLGIYLLTMMGNLIMLLVIR

TDSHLHTPMYFFLSHLSFIDLCFSSVIVPKMLKNLLSQKKTISVKGCLAQ

IFFVLTIGGTEDCILSVMAYDRYAAICHPLLYGQVMSKQRCVQLVRGSWS

LGFLDTFINVLLAMKMDFCDTYIIPHYSCELPSIFLLSCSDVSTNFLVML

CSTIPHGLVTFLSIFFSYIHIIFTILSITSTSGRNKAFSTCSSHLTAVIF

FYGSAFLRYFIPASGSPLELIFSVQYGVITPMLNPLIYSLKNKEVKAAVK

RTLGKYLPCFQWQNKEKG*

>LoafORs2.19

MALRNHSTITKFILLGLSVDSKIQALLFVLFLGIYFLTMLGNLMMMLVIR

TDSHLHTPMYFFLSHLSFIDLCFSSVTVPKMLENLLSQKKTISVRGCLAQ

VFFVFIIGGTEACLLSAMAYDRYAAICHPLLYGQMMSKQWCVQLVWGSWG

LGFLDTLINVPLAMKMDFCDTYIIPHYSCELPSIFLLSCSDVSTNFLVML

CSTIPHGLITFLSIFFSYIHIIYTILSITSTSGRNKTFSTCSSHLTAVIF

FYGSAFLRYFIPASGSPLELIFSVQYSVITPMLNPLIYSLKNKEVKAAVK

RTLGKYLSCFQWQNKEKG*

>LoafORs2.20

MASRNHSTITEFILLGLSADPKMQALLFVLFLGVYLLTMLGNLMMLLVIR

TDSHLHTPMYFFLNHLSFIDLCFSSVTVPKMLENLLSQKKTISVKGCPAQ

IFFVLITGGTEICLLSVTAYDHYAAICHPLLYGQVMSKQRCVQLVCGSWA

LGFLNRLINVPLAMKMDFCDTYIIPHYSCELPSIFLLSCSDVSTNFLVML

CSTIPHALTTFLSIFFSYIHIIFTILSITSTTGRNKAFSTCSSHLTAVIF

FYGSGFLLYFMPTSGSALELIFSVQYGVITPMLNPLIYSLKNKEVKAAVR

RTLGKYLQCVQWQNKEKG*

>LoafORs2.21

MALRNHSTITEFLLLGLSDDPHIEAFLFVLFLVTYLLTIMGNLMMLLVIR

ADLHLHTPMYFFLSHLSFVDICFSSVTVPKMLENLLSQRKTISVEGCLTQ

VFFVFITGGTELLLLCAMAYDRYAAICHPLLYGQIMSKRLYLQLVWGSWG

LSFPDALINILLALNMVFCEAQIIYHFVCEMSSILPLSCSDVSRNIIVLL

CSTLLHGLVTFLLVFISYAHIISTILRISSTSGRSKAFSTCSSHLTAVTL

YYGSGVLRHLMPNSGSLIELIFSVQYSVITPMLNPLIYSLKNKEVKAAVR

KTLKKYLQNIRCLNKDKRLVEHWDKAAHNKTLGEFRVRSTPDYPQCLTLK

AK*

>LoafORs2.22

MSWGNHSTINNFILLGLSSDPKIQALLFVLFLGIYLQTLMVNLLMLLVIW

VDSYLHTPMYFFLSHLSFLDLCFSSTTVPKLLENLLSQRKTISMGGCLAQ

VFFLFHTGGTETCLLAVMAYDRYVAICHPLLYGQMMSNQLCKVLVCGSWS

LAFLGALINILLAMNLNLCGEKPIPHYSCELPSLFPLSCSDVSTNFTVML

CSTFLHGLGTCVLIVFSYALIVSTILSISSSTGRSKAFSTCSSHLTAVLL

FYGSAFLRYVMPNSDSLLELIFSLQYSVIMPLVNPLVYSLRNNEVKAAVR

RTLRNYLQYFR*

>LoafORs2.23P

HPPLQL*NVLHLSCSDVSRNIIFLLCFTTLHRLGTFLFVFLSCALFISII

LSISSTSDRSKTFSTCSSYLTTVTLYYGSGVLHHLMPNSVSLMELIFSEQ

YCMITPMLNPLIYSLKNKEVKATVKRTLEKYFQHIRY*NKDKRMVKD*DK

VACNKTLGEFRVRSTPDYPQCLMLQAK

>LoafORs2.24

MALRNHSTVTEFILLGLSVAPHVQVLLFVLFFMIYLLTLMGNLMMLLVIR

IDSYLHTPMYFFLSHLSFIDLCFSSVTVPKMLENLLSQTKTTSVRGCLAQ

VFFVSFTAGTEACLLSVMAYDRYAAICHPLLYGQIMSKQLYMQLVWGSWG

LGFLDALINSLLAMNLVFCGAQIIHHFSCEMPSILPLSCSDVSKNIVALL

YSTFLHGLGTFLLVFLSYAHIISTILNISSTSGRSKAFSTCSSHLSAVTL

YYGSGLLRYLMPNSGSPIELIFSVQYTVVTPMLNPLIYSLKNKEVKAAIR

RTLGKHFQRIRC*

>LoafORs2.25

MASGNHSTIIEFLLLGLPVGHHMQTLLFVLFLVIYLLTLSGNLLMIMVIR

ASSHLHTPMYFFLSHLSFLDLCYSSVTVPKMLENLLSEKKTISVENCLTQ

AFFVLHSGGTELCLLAVMAYDRYAAVCYPLIYVQMMNNQLCVRLVWASWV

LAFLDALINTVLAMNLDFCESQVIPNFSCEIPSLFPLSCSNSSTNFSVLL

CSALLHAFGTFFLVFFSYGRIVSTILSITSTTGRSKAFSTCSSHLTAVSL

FYSSGFLRYLMPTSGSPWELIFFLQYGVVTPLVNPLVYSLKNKEVKVALK

NMLRKSLQHLR*

>LoafORs2.26

MDVGNHSTILEFILLGLSADPHVQALLFVLFLVTYLLTLMGNLSILLVIR

TDSHLHTPMYFFLSDLSFLDFCFSSATLPKLLESLLSQKKIISVKDCMAQ

VFFLLDSGSTEACLLTVMAYDRCVAICHPLLYDQMMSNQLCKGLAWGSWV

LGFLDALINILLAMNLDFCENQSIPHYSCELPSLFPLSCSDVSTSFAVML

CSTLLRGLGTCVLIVFSYTLIVSTILSIRSSTGKSKAFSTCSSHLTAVLL

FYGSAFLRYVMPISSSPLELIFSVQYSVVTPLVNPFIYSLKNNEVKAALR

RNLRKYLQYFR*

>LoafORs2.27

MALGNHSTITELLLLGLPEDPDIQALLFLFFLVIYLPTLMGNLTMLLLIT

TDSHLQSPMYFFLSHLSFLDLCYSSVTVPKILENLLSQRKSISVEGCLAQ

VFFLLVTGGTEGLLLSLMAYDHYAAICHPLKYGQIMSKQMCRGLMWASWG

LGCLDALANLLLALNLDFCKLQTIHHYSCELPSLFSLSCSDTSANVAMLL

CSFILHAMGTYLLVFFSYDHIVSTILSISSTSGRSKTFSTCSSHLTAVSL

FYGSAFLRYLMPTSGSSLELILSIQYSVITPLLNPLIYSLKNKEVKAALK

RLMLRYLQCLR*

>LoafORs2.28

MALRNNSIITEFILLGLSADHHIQILLFVLFLGIYLMTMMGNLMMLLVIR

VDSYLHLPMYFFLSHLSFIDICLSSVIVPKMLENLLSQKKSISVEGCLAQ

VFFVFATGGTEACLLSVMAYDRYAAICYPLIYGQIMSKQMCCGLVWASWG

LGFLDSLINIFLAWNLDFCEAHVMPHFSCELPSLFSLSCSDVSANIAVMI

CSAILHALGTLLLIFFSYARIISTILSISSTTGRSQAFSTCSSHLTAVSF

FYGSAFLCYLMPTLSSSLEFVFSMQYSVVTPLVNPLVYSLKNKEVKASLK

RILQKGFIKAQITENRQRLNGKRDRIASK*

>LoafORs2.29

MALGNHSTITEFLLLGLSADPKIQALLFVLFLMIYLLTLMGNLMMILVIH

TDSKLHTPMYLFLSHLSFQDLFYSSVTVPKMLEDLLSQRKAISVDGCLAQ

VFFMLATTGIEACLLSVMAYDRYAAICHPLLYGQMMSKQVCVRLVWGSWV

VAFLDALINTLLALNLDFCELQTIPHYSCELPSLFPLSCSDTSTNAAMLL

CSALFHAIGTCLLIFFSYARIVATILSISSTSGRSKAFITCSSHLTAVSL

FYGSAVLRYLMPTSGSALELVLSIQYSVITPLLNPLIYSLKNKEVKPALG

RTMLRYLKCLR*

>LoafORs2.30

MALGNNSIITEFILLGLSADHHIQVLLFVLFLGIYLMTMMGNLMMLLVIR

VDSYLYSPMYFFLSHLSFIDICLSSATVPQILENLLSQRISVSVEGCLTQ

IFFVFATVGTEVCLLSVMAYDRYAAICHPLIYRQIMSKQMCGGLAWASWG

LGFLDALINTLLALNLDFCEACVMPHFSCELPSLFPLSCSDVSTNFVILT

CSAILHALGTLLLIFFSYARIISTILSISSTTGRSKAFSTCSSHLTAVSF

FYGSASLRYLMPNLSSSLELVFSLQYSVVTPLVNPLVYSLKNKEVKAALK

RMLQKVLQHLR*

>LoafORs2.31P

ALRNHSTITQFILLGLSADLHVQALFFVLFLGIYLMTVLGNLTMLLVIRA

DSHLHTPMYFFLSHLSFLDLGFSSVAVPKLLENLLSKRKIISIERCLTQA

FFVLDVGGTEIFLLCAMAYDHYAAICHPLVYSQVMSSQLCVNLVWASWSL

SFLDTVINIPLAVSLNFCNAHTIPHYSCELPSLFPLSYSDVSINITVLVF

STLLHGFGTFFLIVFSYTRIVSTILSINSTTGRSKAFSRCSSHLTAVSFF

YGSAFLCYLMPKSGSPLELIFSLQYCVVTPLVNPLVYSLKNKDVKAAVKR

TLGKCLQW

>LoafORs2.32

MALRNHSTITEFILIGLSTDPHIEALLFSLFLVIYLLTMMGNLMMMLVIR

AHSCLHTPMYFFLSNLSFLDLCFSSVTLPKLLEDLRSEKKTISVEGCLAQ

VFFVFLTAGTEACLLSVMAYDRYAAICHPLLYGQVMSNQRCVKLMLASWG

LASLNAVVILLLAINMDFCEAQTIHHFTCELPALFPLSCSDISININILL

SASLLHGLGTIIPIFLSYARIISTILGISSTTGRSKAFSTCSSHLIAVVL

FFGSGFLCYLMPPSGSSLNVLISLQYSVVTPLMNPLIYSLKNKEVKAAVK

KILGKFL*

>LoafORs2.33

MALGNHSTITEFLLLGLSADPKIQALLFVLFLMIYLLTLMGNLMMILVIH

TDSKLHTPMYLFLSHLSSQDLFYSSVTVPKMLENLLSQRKAISVDGCLAQ

VFFVFATTGIEACLLSVMAYDRYAAICHPLLYGQMMSKQVCVRLVWGSWV

VAFLDALINTLLALNLDFCELQTIPHYSCELPSLFPLSCSDTSTNAAMLL

CSALFHAIGTCLLIFFSYARIVATILSISSTSSRSKAFSTCSSHLTAVSL

FYGSAVLRYLMPTSGSPLELILSIQYSVITPLLNPLIYSLKNKEVKAALR

RMMLRCLRYLR*

>LoafORs2.34P

MALVNNSIITEFILLGLSADHHIQVLLFVLFLGIYLMTMMGNLMMLLVIR

VDSYLYSPMYFFLSHLT/HLSFIDLCLSSVTVPQILGNLLSQRISVSVEG

CLAQVFFVFATGGTEACLLSVMAYDRYAAICHPLIYRQIMSKQMCGGLAW

ASWGLGFLDALINILLALNLDFCEARVMPHFSCELPSLFPLSCSDVSTNF

VVLTCSAILHALGTLLLIFFSYARIISTILSISSTTGRSKAFSTCSSHLT

AVSFFYGSASLRYLMPNLSSSLELVFSLQYSVVTPLVNPLVYSLKNKEVK

AALKRMLQKVLQHLR

>LoafORs2.35

MASRNHSTITEFILIGLSADPHTEALLFVLFLVIYLLTMMGNLLMLLMIR

VDSHLHTPMYFFLSNLSFLDLCFSSVTLPKLLEDLLSEKKTISVEGCLAQ

VFFVFLTAGTEACLLSVMAYDRYAAICHPLLYGQVMSNQRCAKLVLASWG

LASLNAVVILLLAINMDFCEAQTIHHFTCELPALFPLSCSDISTNINILL

SASLLHGLGTFMPIFLSYARIISTILSISSTTGRSKAFSTCSSHLIAVVL

FFGSGFLCYLMPPSGSSMDLLLSLQYSVITPLMNPLIYSLKNKEVKAAVK

KTLGKFL*

>LoafORs2.36

MTLRNHSTITEFILLGLSADPHIEALLFMLFLAIYLLTLMGNLVLLLVIM

ADSHLHTPMYFFLGNLSFLDLCFSSVTLPKLLENLLSEKKTISVEGCLAQ

VFFVFITAGAETFLLSIMAYDRYAAICRPLLYEQLMSNQFCVRLVLTSWG

LAFLNAILIVLLAINLDFCEAQTIQHYTCELPSLFPLSCSDTSIDINILI

YSVLLQALGTFFLIFFSYLRIISTILNINSTTGRSKTFSTCSSHLIAVIL

FFGSDLVRYLMPTSGSSLDLLTSLQYSVVTPMLNPLIYSLKNKDMRAALE

RTLGNYL*

>LoafORs2.37

MDLRNHSTITEFILLGLSADPHIEALLFVLFLVIYLLTLMGNLVMLLVIM

ADSHLHTPMYFFLGSLSFLDICFSSVTLPKLLEGLLSEKKTISVEGCLAQ

VFFVIITGGTEAFLLSMMAYDRYAAICHPLLYGQLMNNQLCVRLVLTSWG

LALLNAILIVLLAINLDFCEAQTIKHYACELPSLFPLSCSDISININILI

CSTLLHAFGTFLPIFISYARIISTILSISSTTGRNKAFSTCSSHLIAVIL

FFGSGLVRYLMPTSGSSLDLLTSVQYSVVTPMLNPLIYSLKNKEVKTALK

RTLGKYYILANEQR*

>LoafORs2.38

MALRNHTTITEFFLTGLSTDPHIEALLFALFLVIYLLTMMGNLMMLLVIR

ADSHLHTPMYFFLSNLSFLDICFSSVTVPKLLEDLLSEKKTISVEGCMAQ

VFFVFITAGTEAFLLSMMAYDRYAAICHPLLYGQVMSNQLCVRLVLTSWG

LASLNSVVIVLLAINLDFCEAQTIHHYICELPSLFPLSCSDTSININILI

CSIFLHGFGTFLPIFISYAHIISTVLSISSTTGRNKAFSTCSSHLIAVIL

FFGSGLVRYLMPTSGSSLDLLASLQYSVVTPMLNPLIYSLKNKDVKAALK

RMLEKYV*

>LoafORs2.39P

MEVSNVTTVTAFVLLGLSNNPQIQVLLFGLFLVIYLLTLTGNLMMLLVIS

TDSHLHTPMYFFLSHLSFLDAFSSSIIVPKLLENLLSRWKIISLLECFTQ

ISLVIFSGATEACLLSVMAYDRFQAVCHPLLYVVAMNRRVCTGLVGACWT

VGMGTSLINTLLLAQQYFCGPNLVRGFACELPSVLLLTCSDPHASIACIL

TTMVVLGLGTLVLLLGSYTHIIMTALGINSAKGRSKIFTTCSSHFLVITI

FYGSGLFR

>LoafORs2.40

MKKQSSGDGENQIIWLILVGFGELQHLGFLPFTLFLAIYVVIVGGNALIM

PAVASSQTLHTPMYFFLCHFSLLEIGYTSNIVPRLLHSFLEGKEAISLVS

CLVQFYMFASLAAAECLLLSTTSYDRYLAICHPLHYPVLMNTWLCGCLAT

GAWLCGFSFSAFTLALAAPLPLCPGIREIDHYFCDFAPVVGLFCGNGQVM

WGAGVCISGFLTLAPFLLIVASYTLILRAVLQILSGYGRQKAFSTCSSHL

RVVGVFYGTLIVVYVAPTDHMAPLIQKAVSVLYTVLTPMVNPIFYSLKSE

EVKWALHRLWRQLMSGCTPLRQTGQLLTSF*

>LoafORs2.41

MGDKGTSNYSDVTDFILVGFRVRPEFHILLFLLFLLVYGMVLLGNISMMA

ITVIDSQLNTPMYFFLGNLSFIDLSYSTVIAPKAMINFLSEKKTVSFAGC

AAQFFLFALFIVTEGFVLAAMAYDRFIAICNPLLYSVHMSRRLCTQLVAG

SYFCGWVSSLLQVSVTFSVTFCASRVIDHFYCDSYQIEKISCSNLFVNKM

VSLSLAAFIILPTIVIIVVSYIYIVSTVLKIPSSEGRKKGFSTCSSHLGV

VSVLYGTVSFVYLTPPSNPELRKVASVFYILVTPMLNPLIYSLRNKDVKQ

ALRKILWKKKALS*

>LoafORs2.42P

MGDKGGDNHKEMTDLIVVGIRFHPELHSLLFLQFLIVYGMVLPGSLSMIG

IVMADPHLNTPLYFFLGNLSVIDLSYSTVLYPKPWSISFHRKRPYILQIV

WLSSSFMLSVLPAMAYDCFMAVKKPLYSV/LSRSLCIQLVAGSYLCGWVS

FILHISVTFSMSSCAS*VIDPF*YDSNPVEKIHFSNILVNKMLSLSLAVI

ITMPTIVAIVVYYMHIVFIVLKIHSSEGKKKAFSTCSSQLGLVSLLYGTA

SFVYLVVIAVILKIVTMFEPIVEALRQFTSLRVILHSQRNLN

>LoafORs2.43

MGDRETNNHSEVTDFILVGFRVSPELHILLFLLFLLVYAMILLGNLGMMT

IIMIDPRLNTPMYFFLGNLSFIDLFYSSVIAPKAMINFWSESKSISFAGC

VTQLFLFALFIVTEGFLLAAMAYDRFIAICNPLLYSVQMSTLLCTQLVAG

SYFCGCISSVLLTSITFTLPFCASRAIDHFYCDSRPLQRISCSDLYFYKM

VFFSLSSSIILPTIIVIIISYMYIVSTVLKIRSTEGRKKAFSTCSSHLGV

VSVLYGAVFFMYLTPDRFPELSKVASLCYTLVTPMLNPLIYSLRNKDVKE

ALRKILKKKSFI*

>LoafORs2.44P

NHSEVTDFILVGFRVGPELHILLFLLFLVVYAMIFLGNIGMMAIIMTDPR

LNTPMYFFLGNLSFIDLFYSSVIAPKAMINFWSESKSISFSGCVTQFFLF

ALFFVTEAFLLAAMAYDRFIAICNPLLYSVQMSTRL*IQLVAGSYFCGCI

SSVLQTSITFTLSFCVSRVIDHFYCDTCPLQRISCSDLFIYKVASFSLTG

IIILPSIIVIVVSYMYIVSTVLKVRSTEGRKKAFSTCSSHLGVVSVLYGA

VFSMYLTPDRFPELSKVASVCYTLVTPMLNPLIYSLRNKDL*EVLKKMIE

KKNTIL

>LoafORs2.45

MGYRETRNHSEVTDFILVGFRVGAELHILLFLLFLFVYAVILLGNVGMMA

IIVTDPRLNTPMYFFLGNLSFIDLFYSSVIAPKAMINFWSESKSISFAGC

VTQFFLFALFIVTEGFLLAAMAYDRFIAICNPLLYSVQMSTGLCTQLVAG

SYFCGCINSVLQTSLTFTLSFCASRAVDHFYCDIRPLHRISCSDLFIYKV

VAFSLSTIIVLPTIIVIIVSYMYIVSTVLKIRSTEGRKKAFSTCSSHLGV

VSVLYGAVFFMYLTPDRFPELSKVASVCYTLVTPMLNPLIYSLRNKDVKE

AVKNILEKKNTIL*

>LoafORs2.46

MGDRETNHSEVTDFILVGFRVSAELHILLFLLFLLVYAMILLGNLGMMTI

IMTDPRLNTPMYFFLGNLSFIDLFYSSVIAPKAMINFWSESKSISFTGCV

TQFFLFALFIVTEGFLLAAMAYDRFIAICNPLLYSVQMSTGLCTQLVAGS

YFCGCISSVLQTSMTFTLSFCASRAVDHFYCDIRPLHRISCSDLFIYKVV

AFSLSAIIILPTVIVIIVSYMYILSTVLKIRSTEGRKKAFSTCSSHLGVV

SVLYGAVFFMYLTPDRLPELSKVASLCYTLVTPMLNPLIYSLRNKDVKEA

VKNILETKSTIL*

>LoafORs2.47

MGDRETRNHSEVTDFILVGFRVSPELHILLFLLFLLVYAMILLGNLGMMT

IIMTDPRLNTPMYFFLGNLSFIDLFYSSVIAPKAMINFWSESKSISFAGC

VTQFFLFALFIVTEGFLLAAMAYDRFIAICNPLLYSVQMSTGLCTQLVAG

SYFCGCISSVLQTSMTFTLSFCASRAVDHFYCDIRPLQRISCSDLFIYKV

VSFSTGTIIILPTIIVIIVSYMYIVSTVLKVRSTEGRKKAFSTCSSHLGV

VSVLYGAVFFMYLTPDRFPELSKVASLCYTLVTPMLNPLIYSLRNKDVQE

AVKIFLEKKNTML*

>LoafORs2.48

MGDKETRNHSEVTDFILVGFRVGPELHILLFLLFLVVYAMILLGNVGMMT

IIVTDSRLNTPMYFFLGNLSFIDLFYSSVIAPKAMINFWSESKSISFAGC

VTQLFLYALFIATEGFLLAAMAYDRFIAICNPLLYSVQMSTLLCTQLVAG

CYFCGCISSVLQTSITFTLSFCASRAIDHFYCDSRPLQRISCSDLFIYKV

VTFSLSSIIILPTIVVIIVSYMYIVSTVLKIHSTEGRKKAFSTCSSHLGV

VSVLYGAVFFMYLTPDRFPELSKVASLCYTLVTPMLNPLIYSLRNKDVKE

AVKTVLEKKNTIL*

>LoafORs2.49

MGDRETTNHSEVTDFILVGFRVRPELHILFFLLFLLVYAVILLGNVGMMA

VIMTDPRLNTPMYFFLGNLSFIDLFYSSVIAPKAMINFWSESKSISFAGC

VTQLFLFALFIVTEAFLLAAMAYDRFIAICDPLLYSVQMSTLLCIQLVAG

SYFCGCISSVLLTSITFTLSFCASRAIDHFYCDSRPLQRISCSDLYFYKI

VFFSLSSSIILPTIIVIIVSYMFIVSTVLKIHSTEGRKKAFSTCSSHLGV

VSVLYGAAFFMYLTPDRFPELSKVASLCYTLVTPMLNPLIYSLRNNDVKE

ALRKILKKKKSFLFNYFLTES*

>LoafORs2.50P

TFNHWEMTDLILVGIRFRSELHSLLFLLFLIVYGMIFLGNLSMIGIIVAD

PYVNTPMYFSLGNVSVIDLSYSTVSVPKAMVNTLVQLSSFFMLSVLASVA

YDCFIAICDPLLYTVHMSRSLCIQLVTGSYLCDWVSSIIRISITFSSSFC

ASGVIDHFYCNSNPVEKINCSNIFVNKMVSLSLATIIIMPTMVVTVVSYM

HIVFIIVKILSSEGRKKVFSTGSSNLGVVSLLCGTVSFAYI

>LoafORs2.51

MKSELNRNYSEVTEFILLGFRTSPELQVLLFLVFLLIYIVTVVGNISMII

VTNVDSRLHTPMYFFLRNLSCLDLCYSTVIAPKTLANFLSNEKKISYNGC

VAQFFFFALFVTTEAFLLAVMAFDRFSAICSPLLYPVHISQKVCVCLVTG

SYLCGAINSVVHTGFTFSLRFCEENRLDHFFCDVPALIEISCVDTFVNEI

VLFVLSAFIVITTTMAILISYAYILSTVLKIPSTQGRSKTFSTCGSHIAA

VSLFYGTVFFMYAQPGAIASPQQNKIVAVFYTLIIPMLNPLIYSLRNRDV

KDAVKRILCGK*

>LoafORs2.52

MKSEMSRNYSELTEFILLGFRTAPGLQILLFLVILLIYIVIVVGNISMII

VIKVDSRLHMPMYFFLRNLSYLDLCYPTVIAPKILANFLSNEKKISYSGC

IAQFFFFALFVTTECFLLAVMAFDRISANCSPLLYPMHMSQKVCVRLVTG

SYICGVINSVVHTGFTFSLRFCEENRLDHFFCDVPALIEISCVDTFVNEI

VLFVLSAFIVITTTMAILISYAYILSTVLKIPSTQGRSKTFSTCGSHIAA

VSLFYGTVFFMYAQPGAIASPQQNKIIAVFYTLVIPMLNPLIYSLRNRDV

KDAVKRILCGK*

>LoafORs2.53

MKSQLNRNYSALTEFFLLGFRTSPKIQILLFLVFLLAYMVTVVGNISMIV

VVKVDSRLHTPMYFFLRNLSYLDLCYSTVIAPNTLANFLSKDKKISYNGC

ATQFFFFALFVGTEGFLLAAMAYDRFSAICSPFLYTVRMSQQACVRLVVG

SYVCGCINSMIQTGFTFSLRFCGENRLDHFFCDVPALIKISCVDTFVNKI

VLFILSALIIIATTMVILVSYAYILSTVLRIPSTHDRSKTFSTCTSHISV

VSLFYGTVFFMYAQPGAISSPEKSKIIAVFYTLIIPMLNPLIYSLRNREV

KNAVKRILLRKISFH*

>LoafORs2.54

MSGSEPVVGRNQSLCTKFTFVAFSSLAELQSLLFVVFLVIYLLTVGGNLI

VICLVWITPSLHTPMYFFLVNLSFLEMCYISSVVPQMLMHLLVETKTISV

GGCAAQMCIFTILGLTECCLLAAMAYDRFVAICYPLHYSILMGPRVCLKL

AAASWTTGVVVESVQTTWIFTLPFCGTGKIQHFFCDIMPVVKLACVDTSH

NEIVMFAVSVFFIMSPCLLILCSYVRILTAILRIPSAAGRRKAFSTCSSH

VLVVSLFYGTALFTYLQPKTAHTPETDKVTALMYTVVTPALNPVIYTLRN

KEVKEAFQRVTQRNSLSQMA*

>LoafORs2.55

MMRNQTSVIEFILLGLTDDTELQAVLFLFLLLTYVLSIMGNLTIIILTLL

DYRLQSPMYFFLRNFSFLEISFTSVFVPKMLVNIVTGDKTISFAGCFTQY

FFAILLGATEFYLLATMSYDRYVAICRPLHYMTMMSRRLCIQLVLCSWFS

GLLVVLVPHIMTLQLPFCGSNIINHYCCDYTVLLHLSCSDTYFIGMIEFF

LTGATLIFTLVLVILSYTYIIRTILRIPSVHQRKKAFSTFSSHMIVVSLS

YGSCIFMYINPSVEDAATFNKGVAVLNTSVAPLLNPFIYTLRNQQVKIAF

KDMVSKIQFFFKKVKLFEVHH*

>LoafORs2.56

MRNQTSVIEFILLGLTDDTELQAVLFLFLLLTYVLSIMGNLTIIILTLLD

YRLQSPMYFFLRKFSFLEISFTSVFVPKTLVNIITGDKTISFAGCFTQYF

FAIFLGATEFYLLAAMSYDRYVAICRPLHYVTMMSRRLCIQLVLCSWFSG

LLVVLVPHIMTLQLPFCGSNIINHYCCDYTVLLHLSCSDTYFIEMIEFFL

AGVTLIFTLVLVILSYTYIIRTILRIPSAQQRKKAFSTCSSHMIVVSLCY

GSCIFMYINPSVKNAATFNKGVAVLNTSIAPLLNPFIYTLRNQQVKIAFK

DMVGKIQLFFQESKTI*

>LoafORs2.57P

KNHTTVTVFILVGLTEDPQLKIVLFIFLLLTYLLSISGNLVIITLTLLDS

HLKTPMYFFLRNFSFLEVSYTTVCIPKLLVTMATGDKTITYNCCAAQLFF

AFLLGASEFYLLAIMSYDRYVAICKPLHYTTIMNSKICIQLVLGSWMAGF

LIIFPGLILGLGLDFCDSNIIDHFYCDTAPLLQISCTDTHLLEMMSFILA

LVTLLVTLVLVILSYTYIALTILKIPSANQRKKAFSTCSSHMIVISLSYG

SCIFMYIKPSAKQRIYLMKGVSVVNTSVAPLLNPFIYTLRNQQVKQAFKN

LLQRVLSLSK

>LoafORs2.58

MVDKETSNHSEVTDFTLVGFRVGPELHILLFLLFLLVYAMILLGNIGMMS

IIMNHPRLNTPMYFFLGNLSFIDLFYSSVIAPKAMINFWSESKCISFAGC

VTQFFLFALFIVTEGFLLAAMAYDRFIAICNPLLYSVQMSTSLCTQLVAG

CYFCGCISSVLQTSMTFTLSFCASRAIDHFYCDGRPLQRISCSDLFVYKT

MTFSLSILIILPTIIVIIVSYMYIVSTVLKIPSTEGRKKAFSTCSSHLGV

VSVLYGAVFFMYLTPDRFPELSKVASLCYTLVTPMLNPLIYSLRNKDVKE

ALRKSLKKKIVLFNSFLAVI*

>LoafORs2.59P

MGDKGEDSYSEMTDFILVGIRFHPERHSLLFLLFLVVCGMVLLGILNMIG

FIVTDPRLNTPLYFFLDNPSVIDLSCSTVILPKFMVNILSQKKIISFADC

VAQLFFYALY/ILAAITYDCYIAICNPLLYTVCMSRRLCIQLVAGSYLCR

*VSSILQVCVTFSMSSCVFQVIDHLYCDSNPTEKIYCSNIFIKKIVSLSL

ALIITMPTIVLIVEPYIYIVFIVLK

>LoafORs2.60P

MRNHTMLVTFIGLTGDPQLQAVISLLFFTYVLSITGNLTIITLTLLDSHF

KTPMYFFL*HFSFLEIYFTTVYIPKFLVIMATGDKTISYN*YVAQLFFYY

SFGGNRIIPLGAVFYDHHTAISKLLHYMPSMSSRACNLLIFALGLSGFLV

VFPPCLIGHQIDFCAINTIEHYFCDSFPT*QILCTSTY/TQHRKKAFSTC

FSHMVVVSIPYGNCVFMYVKPSAKERVFLNKQIALLSTFVSPMFNPFVYT

LRSKQVKDAFKHMAK

>LoafORs2.61

MRNHTTVTTFILLGLTDDPQLQVVIFLLLFFVYMFSITGNLTIITLTLLD

SHLKTPMYFFLRNFSFLEISFTTVCIPKFLLSMVTGDKTISYSNCAAQLF

FTILLGATEFFLLAAMSYDRYVAICKPLHYMTIMSSRICNLLIFASWLAG

FLIIFPPLLMGLQLDFCAANTVDHFFCDVSPILQLSCTDTYIIELMTLLS

AILTLLVTLVLVVLSYTNIIRTILKIPSSQQRKKAFSTCSSHMVVVSISY

GSCIFMYVKPSAKERVSLNKGIALLSTSVAPMLNPFIYTLRNKQVKDAFK

HMAKKIEVFSIK*

>LoafORs2.62

MRNHTRVTVFVLAGLTDDLQLKVVLFIFLLLTYLLSITGNLIIITLTLLD

THLKTPMYFFLRSFSLLEISYTTTCIPKLLVIMATGDKTISYNCCVTQLF

FAFLLGASEFYLLAAMSYDRYVAICKPLHYTTIMNRKICIQLVLSCWLAG

FFVIFPPLILGLELDFCASNTVDHFYCDATPLLQVSCSDTQLLETMAFIS

AMVTLLVTLVMVIISYTCIALTILKIPSTSQRKKAFSTCSSHMIVISLSY

GSCIFMYVKPSVKQRISLSKGIAVLNTSVAPLLNPFIYALRNQQVKKAFT

NLMHRIISFSKN*

>LoafORs2.63P

KNQSVDIEFVLLGLTDDPLMQTVIFLFLFLNYVLSLLENLSIILLTLLDP

HLKTPMYFFLRNFSFLEVLFTRVCVPLFLTTILTGDKTISYNGCAAQLFF

/FFILLLGVTEFYLLAAMSYDRYVAICKPLHYPIIMSSRVCYQLVLSSWV

TGFLIIFPPLVLGLQLDFCASKTIDHFLCDTSPILQIS*TDTRLIELMAF

VLAVVTLVVTLLLVILSYTYIIKTILKFPSAQQ*KKAFSTCSSHMVVVSL

TYGSCVFMYMKPSAKERVTLTKDVAVLNTSVSPLLNPFIYTLRNQQVKEA

LKDMLQRVCY

>LoafORs2.64

MKNQSLEIKFILLGLTDDPQLQIVIFFFLFLNYTFSTTGNLIIVLLTLLD

ARLKTPMYFFLRNFSFLEILFTTVCIPRFLITLVTKDKTISYNNCAAQLF

FILLLGVTEFYLLAAMSYDRYVAICKPLHYPIIMSSRVCYQLVLSSWVTG

FLIIFPPLVMGLKLDFCASKIIDHFVCETSPILQISCTDTRVLELMSFVL

AVMTLVVTLVLVILSYTYIIRTILKFPSAQQRTKAFSTCTSHVVVVSMTY

GSCIFMYIKPSAKERVTVSKGIALLYTSVAPLLNPFIYTLRNQQVKEVCW

DVLQKILCFSKKVI*

>LoafORs2.65P

FLYFSFSTTF*VGNLSIILLTLLDPRLKTPIYFFL*NFSFLEISLTTICI

LRFLTIIVTEIKIISYKDCAFPLFFFLLVAIRESYLLATMSCDRYVAICK

PLHYSIIMRSQVCYQLVLSSWAAGFLNTFPPLVMGVKLEFCGCKVIDHFM

CDTSPILQISCTDAHFLELISFVSSAITLVATLLLVIF/FSYAYIIKTIL

KIPSAQKRTKAFSTCSSHMIVVSLTYGSCVFVYMKPSAKERVTLSKGVAV

IYTSVAPLLNPFIYSLKNQQVKHAFKDTLKKIYIFFKK*GKKIKS

>LoafORs2.66P

MMGKLSIILLTFLDPWLTAPM*FFL*NFSLEILLTTTCIPRFLTTIVTKN

KIIAYNNCTSQLFFFLLLEVTEFNLLAAMSYDSYVAICKPLHYPIIMRSE

ACYQLVLSSWLAGFLNIFPTWVLGLKLEFCASKVIGHFICDTSPLLQISC

TDTGSLELASFVSAGVIFVTTLLLVIFSYRYIIKTILKIPSAQKRTKTFF

TCSFYLIVVSLTYGTCIFICMKPSVKQRVALSKGVAVIYSTVAPLLNPFI

YILRNPE

>LoafORs2.67P

MRNHTIITEFVLLGISDDPKLQVVIFIFLFIAYVLSITGNLTIISPTLTD

SPLNTPVYCFLQSFSLEITFAIVSIPRFLGTIITKVKTISYNDCLAQLFF

FTFMGVSEFFLLTAMSYDHYVAICKPFHYTTIMNKKICALLVLCSWLGGF

LTIFPPLMLILQLDFCSSSVIDIVT/H*HCDYSPILQLSCTDTWLLEMIG

CYFPFVPLLFTLALVILSYLCIVITILRTPSASQRKEAFSTCSSHMIVIS

ISYGSCVFMYIKPLARERASVTKGVATLNTSIAPMLNPFIYPLRNKQVKQ

AFKGLIHKTGFPENK*KYVLT

>LoafORs2.68

MRNHTAITEFVLLGMSDDPKLQIVIFVFLFITYMLSITGNLTIITLTLLD

SHLQTPMYFFLRNFSLLEVSFTTVSIPRFLGTIITGDKTISFNNCIAQLF

FLILLGVTEFYLLAAMSYDRYVAICKPLHYVTIMNRRVCALLVFSSWLAS

FLLVFPVLMLLLKLDYCRSNIIDHFTCDYFPLLQLSCSDTKFLEMIGFSC

AVFTLMFTLALVILSYIYIIRTILRIPGTSQRTKAISTCSSHMIVLSISY

SSCIFVYVKPSAEERVSLSKGVAVLNISIAPMLNPFIYSLRNQQVKQAFM

DLARRTVFFTSKSKDVVS*

>LoafORs2.69

MNNHTVVTEFVLLGLSDDPDLQIVIFLFLFITYVLSVTGNLTLITLTFLD

SHLQTPMYFFLRNFSFLEISFTTVCIPRFLGAIITRDKTIYCNNCAAQLF

FFIFMGVTEFYILTAMSYDRYVAICKPLHHTSIMNRKFCSLLVLCAWLGG

FLTVFPPLMLLLQLDYCVSNVIDHFACDYFPLLQLSCSDTWLLEVIGFYF

ALVTLLFALALVILFYMYIVRTVLRIPSASQRKKAFSTCSSHMTVISVSY

GSCVFMYANPSAKEKASLTKGVAILNTCVAPMPNPFIYSLRNQQVKQAFK

DLLQKVVFSATKGN*

>LoafORs2.70

MKNYTDVTEFVLLGLSDDPKLQIVIFVFLFITYMLSITGNLTIITLTLLD

SHLQTPMYFFLRNFSLLEVSFTTVSIPRFLGTIITGDKTISFNDYMVQLF

FFIFLGVTEFNLLAAMSYDRYVAICKPLHYTTIMNLRVCTLLVFTSWLAS

FLIIFPLLMLFTQLDYCTSNVIEHFACDYFPLLCLSCSDTKFLELTGFSC

AVFTLLSTLALIILSYIYIIRTILRIPSASQRTKAFSTCSSHMIVISISY

GSCIFVYINPSAKDRVSLSKGVAVLNTSVAPMLNPFIYSLRNQQVKQAFM

DLVRKIAFFSSK*

>LoafORs2.71P

SEFDLLGLSDDPDLPIVTFLFLFVTYALSFTENLTLITLTLVDSHLQTPI

YFFL*NFSFSFATISKTQKTKLIAVM*IPTHSDPIGQSRIAP*GFPGVLA

DSNC*RFG*ET*LNRSASYNYHQE*HHCL*QLGSSRLFLYFHGGGRNLPS

AGYVL*PLCGHLQAPALCNHLEQETLLPACVMCVARKISDHFSTLYASPQ

LDYCASNVIDHIACDYFPLFQLSC*DTWLLKVIGFYFALVTLLFTLALVI

LSYMYIIKTILRIPSASQRKKSFLHLFL*HDCHFHLLWKLRLHVCQSLCK

TKGIIDQRTGYSVAPMLSPFIYSLKNQQVKEVFKDLLQNVV

>LoafORs2.72

MRNHTAITEFVLLGLSDDPKLQIVTFVFLLITYMLSITGNLTIITLTLLD

SHLQTPMYFFLRNFSLLEVSFTTVSIPRFLGTIISGDKTISFNNCIAQLF

FFILLGITEFYLLAAMSYDRYVAICKPLHYVTIMNRRVCTLLVFSSWLTS

VLIIFPALMLLLKLDYCRSNLDHFTCDYFPLLQLSCSDTKFLEVMGFSCA

VFTLLFTLALIILSYIYIIRTILRIPCTSQRTKAFSTCSSHMIVISISYG

SCIFVYIKPSAKDRVSLSKGIAVLNTSVAPMLNPFIYSLRNQQVKRAFMD

MARRTVFFTSR*

>LoafORs2.73

MKNQSVEIEFILLGLTNDPELQIVIFIFLFLNYILSVTGNLSIILLTLLD

LRLKTPMYFFLQNFSLEILLTTISIPRFLTSIVTKNKIISYDGCASQLFF

FLLICVTEFYLLAAMSYDRYVAICKPLHYPIIMSTKVCYQLVLSSWAAGF

LNTFPPLVIGLKLEFCASKVIDHFMCDTSTVLQISCTDTRFLELISFVLS

AIILVVTLLLVIFSYTHIIKTVLKIPSAQKRTKAFSTCSSHMIVVSLTYG

SCIFIYMKPSAKERVTLSKSVAVIYTSFAPLLNPFVYSLRNQQVKQAFKD

TLEKIFTVFKK*

>LoafORs2.74P

ISIPRFLTTIVTKNKIVSYNDCISQLFFFLLLGVTEFYLLAAVSYDRYAA

ICKPLRYSIIMRSKVCYQLVLSSWTAGFSEYLSTIGLGTK/LLLSCRFLA

QTHFLEMILFVFTVVTLVVILSYTYIVKTILKIPSAQKRTKAFSTCSSHM

IVVSLTYGSCIIFIYMKPSAKERVALPKGVAVSIPQLLLYSIPSS*EPTS

ETSFQGYTKKSFHFFLK

>LoafORs2.75

MEFRRNLTMRNRTMVTTFTLIGLTDNQNWQIVIFLFLFLTYLLSITGNLT

IILLTLLDSHLKTPMYFFLRNFSLLEMLFTSVCIPRYLVSIVTMDKTISY

DACMTQLFFAIFLGASEFFLLTAMSYDRYVAICKPLHYATIMNNRVCTQL

VVTSWVAGLLAISPGLILCLRLEFCDDNIIDHFGCDYSPLLKLSCTDTWS

IELLAFISATAILLITLALVVLSYVNIIRTILKIPSAQQRKKAFSTCSSH

MIVVSISYGSCIFMYMKPSAEERVALNKGVAVLNSSIAPLLNPFIYTLRN

EQVKQVLKGIVQKCIITLKKK*

>LoafORs2.76P

TPLLKLSCTDTWSIELLGFISAIAILLITLALVVLSYVNIIRTILKIPSA

QQRKKAFSTCSSHMIVVSISYGSCIFMYMKPSAEERVALNKGIAVLNTSI

TPLLKPFIYTLRNKQVKETLKDIVQKCIITLKNSFCFLKETTKGH

>LoafORs2.77

MKFRRNLTMRNHTMVKTFILLGLTDDPNWQIIIFLLLFLTHLLSVTGNLT

IVLLTLLDSQLKTPMYFFFQNFSFLEMSFTSNCIPRYLFSIMAKDKMISY

DACMTQLFFAIFLGASEFFLLTAMSYDRYVAICKPLHYMTIMNNRVCTQL

VVTSWLDGLLAISSGLILCLRLEFCDANIIDHFGCDYSPVLKLSCSDTRS

IELLGFITAIVILLITLALVTLSYAYILRTILKIPSAQQRKKAFSTCSSH

MIVVSLSYGSCIFMYIKPSAVERVALNKGIAVLNTSIAPLLNLFVYTLRN

KQVKQALKDVIKRCIFST*

>LoafORs2.78

MRNQTVPTEFILLGLSDDPGLQMVIFLFLIITYILSVTGNLTIITLTLVD

AHLQSPMYFFLRNFSVLEISFTTVCIPRFLGTIITRDKTISYNNCTAQLF

FFIFMGITEFYLLTAMSYDRYVAICKPLHYTTIMNNRVCMLLVFCAWLTG

FLNIFPPVILFLQLDYCGSNVIDHFACDYFPLLQLSCSDTWLLEVIGFYS

AIVILLFTLALIILSYVFIIRTILKLPSASQRKKAFSTCSSHMIVISISY

GSCIFMYANPSAKEKASLTKGVAILNTSVAPMMNPFIYTLRNQQVKQAFK

GTIQKIIFFTGK*

>LoafORs2.79

MKNYTEVKEFILLGLSDDPEVQVVIFVFLFITYMLSITGNLTIITLTLLD

SHLQTPMYFFLRTFSLLEVSFTTVSIPRFLGTIITGDKTISFNDCMAQLF

FFILLGVTEFYLLAAMSYDRYVAICKPLHYTTIMNGRVCTLLVFSSWLAS

FLIIFPSLMLFIQLDYCKSNVIDHFTCDYFPLLYLSCSDTKFLELTGFSC

AVFTLMFTLALIILSYIYIIRTILRIPSTSQRTKAFSTCSSHMIVISISY

GSCIFMYINPSAKDRVSLSKGVAVLNTSVAPMLNPFIYSLRNQQVKVAFM

DMARKTAFFSSK*

>LoafORs2.80P

SAMRNQTVLTEFFLLGQSDDPEPQVVIFLFNYHITVTGNLTAITLTLVDT

HLQSPVYFSLRNFSVLDIS/PRFLGTIITRDKTISYNNYTAQLFFFIFMG

ITEFYLLTAI/SYDCYVVFCKPLHYTTIMNKRVYMLLVFCAWLTGFLHIF

PPVILFLQLD*CGSSVIDH

>LoafORs2.81

MKNYTEVTEFILLGLSDDPKLQVVIFVFLFITYMLSITGNLTVISLTLLD

SHLQTPMYFFLRNFSLLEVSFTSVSIPRFLGTIITGDKTISFNDCMAQLF

FYILLGVTEFYLLAAMSYDRYVALCKPLHYTTIMNGTVCTVLVFFSQLAS

FLIIFPALMLVTQLGYCKSNVIDHFTCGYFALLHLSCSDTKFLELTGFSC

AVFTLMFTLALVILSYIYIIQTILRIPSTSQRTKAFSTCSSHMIVISISY

GSCIFRYINLSAKDRVSLSKGAAVLNISVAPMLNPFIYSLRNQQVKRAFM

DLVRKIVFFSSK*

>LoafORs2.82

MEFRRNLTMRNHTVVTTFILVGLTDDPNWQSVIFLFLFLTYFLSVTGNVT

IILLTLLDSHLKTPMYSFLRHFSFLEMSFTSVCIPRYLVSIVTLDNRISY

DACVTQLFFAIFLGASEFFLLAAMSYDRYVAICQPLHYATIMSSKVCTQL

VVTSWVAGLLTISPGLIMGLRLEFCDANIIDHFGCDYSPLLKLSCTDTRS

IELLSFILAIATLLITLALVILSYAYILRTILKIPSAQQRKKAFSTCSSH

VIVVSISYGSCIFMYLKPSAEERVSLNKGIAVLNTSIAPLLNPFIYTLRN

KQVKQALKDIIKKRIFIALNK*

>LoafORs2.83P

MRNHTIITTFILVGLTDDPNWQTVIFLFLFLTYVLSVTGNLTIILLTLLD

PHHKTPMYFFLWNFSFLEMSLTSVCIPRYLVSILTMDKTIYYDACAVQIF

FAIFLGASEFFLLASMSYDCYVAICKPLHYTTVMSSRVCTKLVIMSQVAG

LLTIFPGLIMGLKLGFCDANIIDHFYCDCASVLKLFCTVTGVFEMLGFIS

AMVTLLITLALVILSYAYILRTILKIPSAQQRKRAFSTCSSHIIVVSTSH

GSYIFTYMLPSAEERVALNKGAAVVNLSLKHLF*ILSYT

>LoafORs2.84P

FLFFMYILSITGNLTLITLTLIDSHLKTPMYFFLKNFSLLEISFTAVCIP

RFLVSIITGDKTISYNSCMAQVFFFILFGSTEFFLLTVMSYDSYVAICKP

LHYTTIMNSRICLQFVISSWLAGFLINFLPVIMGLQLDFCDSNIIDHFTC

DYSPMLLIACTDTAFLQLMGFVIAVFTLIVTLSLVILSYAFILRTILKIP

SAEKRKKAFSTCSSHMFVVSISYGSYIFMYVKTSAEEGLAFTKGIAVLNT

SVVPILNPFLYSLRNQQVKQAFKNLVQRCFSNKF

>LoafORs2.85

MEFRRNLTMRNHTMVITFILQGLTDDPNWQIVIFLFLFLTYLLSVIGNLT

IILLTLLDSHLKTPMYFFLRNFSFLEISMTSVCIPRHLFSIMTMDKTISY

DACVTQLFFAIFLGASEFFLLAAMSYDRYVAICQPLHYATIMSSRVCTRL

VVTSWVAGLLTISPALIMGLGLEFCDANVIDHFLCDYAPVLKLSCTDTQV

IELLSFILAIFTLLITFALVILSYANIVRTILKIPSAQQRKKAFSTCSSH

MIVVSISYGSCIFMYIKPSAEDRVALNKGVAVLNTSVAPVLNPFIYTLRN

KQAKQALRDIIKKCIFIISK*

>LoafORs2.86P

DYRYSTVLPHFTCDSSPMLLIACTDTKFLEFMAFFLAVFTFMATLALVIL

SYTLTLRTILKIPSAQQRKKSFSTCSSHMIVVSISYGSCIFMYVQTSAKE

GVVLSKGVAVLNTSVAPMLNPFIYTLRNQQVKQTIKDL

>LoafORs2.87P

PLLYLSFSDIKFLELTGFSHAVFTLMFTLALIILSYIYIIQTILRIPSTS

QRTKAFSTCSSHMIVISISYGSWIFMYVNLSAKGRVSLSKGVPLLNTSVA

PMLHPFIYSLRNQQVK*AFVDMARKTAFFSSK

>LoafORs2.88

MKNYTEVTEFILLGLTNDPREQVVLFVFLLVTYMLSVSGNLIIITLTLSD

PHLQTPMYFFLRNFSFLEISFTSVCIPRFLVTIVTGDRAISYSGCVAQLF

FVILLGVTEFYLLAAMSYDRYVAICKPLHYTTIMSRRVCILLVFSSWFAG

FLIIFPPIILLLQLDFCASNVIDHFICDSSPILQLSCTNTHFLELMAFFL

AVITLMVTLTLVILSYTYIIRTILRIPSMSQRKKAFSTCSSHMIVVSLSY

GSCVFMYIKPSARERVTLSKGVAVLNTSVAPLLNPFIYTLRNQQVKQAFN

IMVQRMVFPSNK*

>LoafORs2.89

MRNHIRVTTFILVRLTDDPNWQIVIFLFLFLTYLLSVTGNLTIILLTILD

SQLKTPMYFFLRHFLFLEMSFTSDWIPRYLVSIVTLDNRISYDACMTQLF

FAIFLGASEFFLLTAMSYDRYVAICKPLRYATVMNNRVCIQLLVTSWLAG

LLTISPGLIMGLRFEFCDANIIDHFGFDYSPVLKLSCTDTRSIELLGFIT

ATVIVLITLALVTLSYAYILRTILKIPSAQQRKKAFSSCSSHMIIVSISY

GSCIFMYIKPSAEERVALNKGVAVLNTSIAPLLNPFIYTLRNKQVKQDLK

DVIRRCIFIT*

>LoafORs2.90P

LRNHTTVTTFILVGLTDDPNWQIVIFLFLFLIYLFSVTGNLTIVLLTLLD

SQLKTPMYFFLRHFSFLEISFT/DWIPRYLISIVTMDNRISCDACMTQLF

FAIFLGASEFFLLTAMSYDRYVAICKPLRYATILNNRVCTQLLVTSWLAG

LLAISPGLIMGLGLEFCDASNIDHFACDYSPVLKLSCTDTQSIELLGFIS

AIVILLITLALVILSYAYILRTILKIPSAQQRKKAFSTCSSHMIIVSISY

GSCI

>LoafORs2.91

MKNRSSVKEFILLGLTDDPELNILIFHFLFFTYTLSITGNLTIIALTLID

PCLKTPMYFFLRNFSFLEISFTTVCIPRFLVSIITGNVIISYNSCMAQMF

FFILLGSIEFFLLTVMSYDRYVAICKPLHYTTIMNSRVCIQLVISSWLAG

FLFIFPPVILGLQLDFCDSNIIDHFTCDSSPMLLISCTDTAFLELLGFLL

AVVTLVVTLTFVILSYALILRTILRIPSAEQRKKAFSTCSSHMIVVSISY

GSCIFMYVKTSAKEGVAFTKGIAVLNTSVAPMLNPFIYSLRNQQVKQAFK

NLIKGCFSNKFQS*

>LoafORs2.92

MKNRTSVTDFILLGLTDNPEVQVVIFFFLFLTYLLSVTRNLIIITLTLLD

SHLKTPMYFFLRNFSFLEISFTSVCNPRFLVSIITGDKSISYNACAVQLF

FFIFLGSTEFFLLASMSYDWYVAICKPLHYTTIMSSKICYQLVISSWLAG

FLVIFPPLIMGLELDFCDSNIIDHFTCDSAPLLQISCTDTSTLELMSFVL

AVFTLLSTPSLVILSYTYILRTILRLPSAPQRKKAFSTCSSHMIVVSISY

GSCIFMYVKTSATEGAALTKGVAMLNTSAAPMLNPFIYTLRNQQVKQAFK

DIIKKTLSSKTLI*

>LoafORs2.93P

MEFRRNLIMRNHTMVTTFILVGPIDVPNW*VVICLFLFLIYLLSVTGNLT

IILLTLLNPQLKTLMHFFLRHFSFLEMSFTSDWIPRYLVSIVAMDNMISY

DACVTPLFFCHLL/VAICKLPHGATIMNNRACTQLVVTSWLAGLLTISPG

LIMGLGLEFCDANIIDHLACDDSPVLKLSCTDTWSIELLDFISAIVILVI

PLALVIQWGFFSDTLLRIYSKSNSEDLFCPFCRAEEEGFLTFSSHRITVS

IS/YGSCIFIYMKLSEEERVALNKGVAMLNTSTAPLFNPFIYSLRNKQVK

QATKVIVEKCIITLKT*SSFYK

>LoafORs2.94

MRNHTMVTTFILVGLTDDPNWQIVIFLFLFLTYLFSVTGNLTIVLLTLLD

SQLKTPMYFFLRNFSFLEMSFTSDWIPRYLVSIVTMDNMISCDACMTQLF

FAIFLGASEFFLLTAMSYDRYVAICQPLHYATIMNNRVCTQLLVTSWLAG

LLTISPGLIMGLRLEFCDANIIDHFGCDYSPVLKLSCTHTRSIELLGFIS

ATVILLITLALVILSYAYILRTILKIPSAQQRKKAFSTCSSHMIVVSISY

GSCIFMYIKPSAEERVALNKGVAVLNTSIAPLLNPFIYTLRNKKVKQALK

DVIKRGIFIT*

>LoafORs2.95P

MRNYTEATEFILLGLTNDPQGQVVLFVFLLVTYMLSVNGNLIIITLTLSD

PHLQTPMYFFLRNFSFLEISFTSVCIPRFLVTIVTGDRAISYSGCVAQLF

FVILLGVTXXXXXXXXXXXXXXXXXXXXXXXXXXXXXXXXXXNVIDHFIC

DSSPILQLSCTNTHFLELMAFFLAVVTLMVTLTLVILSYTYIIQTILRIP

SMSQRKKAFSTCSSHMIVFSLSYGSCIFMYIKPSARERVTLSKGVAVLNT

SVAPLLNPFIYTLRNQQVKQAFNIMVQRMVFSLNK

>LoafORs2.96P

MKNYTEVTEFILLGLSDDPEVQVVIFVFLFITYMLSITGNLTIITLTLLD

SHLQTPMYFFLRNFSLLEVSFTTVSIPKFLGTIITGDKTISFNDCMA*LF

FFILLGVTEFYLLAAMSYDRYVAICKPLHYTTIMNGRVCTLLVFSSWLAS

FLIIFPALMLVIQLGYCKSNVIDHFTCGYFALLHLSC*DTKFLELTGFPC

AVFTLLFTLPLVILSYIYI/YIYIIRTILKIPSTSQRTKAFSTCSFHMIV

ISLSYGSCIFMYINLSAKGRASLSKGVAVLNTSVAPMMNSFFYSLRNQQV

KGALTGMARKIAFFLSK

>LoafORs2.97P

NSTALTDSNCDSSPMLLIACTDTKFLEFMAFFLAVFIFMVISALVVLSYT

LTLRTILKIQSAQQRKKAFSTHSSHMIVVSNSYGSCIFMYVKKISKRRCG

FEQRCSSHVAPMLNPFIYTLRN*QF*QALKDLIK

>LoafORs2.98P

LVGSSVSMLAVMSYDHYVAICQPLHYATIMSSRVCTQLVVTSCVAGLLTI

SPALIMGLGFEFCDANIIDHFLCDYSSILKLSCVDTWVIELLSFILAIFT

LLITLDLVTLSYANIMRTILKIPSAQQRKKVFSTCSSHMIVVCISYGSCI

FMYIKPSAE*RVVLNKGIAVLNTSVAPVLNPFIYALRNK*VKQVLKDIIK

K

>LoafORs2.99

MRNYTMVTTFILVGLTDDPNWQIVTFFCLLLTYLLSVTGNLTIILLTVLN

SQLKTPMYFFLRHFSFLEMSFTSVCIPRYLVSIVAMDSTISYDACVTQLF

FVIFLGASEFFLLTAMSYDRYVAICIPLHYATIMENRVCTQLVVTSWLAG

LLTISPGLIMYLRLEFCDANIIDHFACDYSPILKLSCTDTRSIELLGFIS

AIVILLVTLALVTLSYAYILRTILKAPSAQQRKKAFSTCSSHMIVVSISY

GSCIFMYMKPSAEERVTLNKGVAVLNTSIAPLLNPFIYTLRNKQVQQALK

VTVQKCITTLKK*

>LoafORs2.100P

MSYDHYVTTYKPLHYMTIMSNKICKIMVICSWMTTFMIILPPLGLGLNLE

FCDSTAIDRIGCDVSPILKISCLDTWLIEQKVIACAVLTFIVTVVCVALS

YIYVMKTILKFPFVQQRKKAFST*SAHMMAVSITYGRCIFIYVNPSAKEE

VEINKGVAVLISSISPMLDPLIYALRNKQVK

>LoafORs2.101

MRNHTAVTTFILLGLTDDPQLQVLAFIFLFLTYILSVTGNLTIIILTLTD

SHLKTPMYFFLRNFSFLEISFTTVCIPRFLYSISIGDNTITYNACASQIF

FFGLFGATEFFLLAAMSYDRYVAICKPLHYMTIMNSRVCTVLVLCCWISG

LMIIITPLGMGLQLEFCDSNAIDHFGCDAAPLFKISCSDTSLLEHVVIIC

AVLTFIITLIGVVLSYIYIIKTILRFPSTQQRKKAFSTCSSHMIVVSITY

GSCIFIYIKPSAKEDVDINKGVSVLTTSVAPLLNPFIYTLRNKQVKQSFN

DMVKKIAFIFTKVRAH*

>LoafORs2.102

MKNHTRKIEFILLGLTDNFQLEIVIFLFLLLSYMLSVIGNLAIIALTLLD

SHLKTPMYFFLRNFSFLEISFTTTCIPRFLIAIVTKEKTISYNGCVTQMF

FYIFLGVTEFFLLAAMSYDRYVAICKPLHYTSVMSSRLCHQLVLSSWVTA

FLVIFPPLTLGLNLDFCASNIIDHFICDISPVLQLSCSDTHLLELIAFLL

ALMTLIVTLSLVIISYSYIFNTIMKFPSAQQKKKAFSTCSSHIIVVSITY

GGCIFIYIKPAANERVTLSKGVAVLNTSVAPLLNPIVYILRNQQVKQGFR

AEFKKVFSTLDK*

>LoafORs2.103P

RLQIVIFLFLLLIYVLSMIGNLTIIALTLKTPLYFFLCNFSFLEISFTAA

YIPRFLIRTVTREKTHFL*WLYVSVVFYVFWGITEFFLLVAMACDRYIAI

TNP/KPLHFTSIMSTRLCCQLVSALG*LHSWSFPSIDFVS*LEFLPSNIT

DHFICDISPILQLSCSDTHLLELIAFLIALMTVMVTLVLVIISYSYIIKT

ILKFPSAQQKKKAFSTCSSHMIVVSITYGGCIFIYIKPAANERVTLSTGV

AVLSTSVAPLLNPIVYTLRNQQ

>LoafORs2.104

MRNHTAITTFILLGLTDDPQMKALLFTFLFFTYILSITGNLTIITLTLVN

SYLKTLMYFFLRNSSFLEVSFVTVFIPRFLYSVSTGDNTVTYNACASQIF

FVFLFGATDFFLLAAMSYDCSVAICKPLHYMTIMSNKVCVLLVLCCWVAG

LMIILPPLSLGLQLEFCDSSAIDHFSCDAGPLLKISCSDTWLLEQLIILV

AVFALIITLVCVFLSYTYIIKTILRFPSVQQRKKAFSTCSSHMIVVSITY

GSCIFIYIKPSVKEEVAINKGVSVLMTSVAPLLNPFISTLRNKEVKLAFN

AL*

>LoafORs2.105

MEFRRNLTVGNHTMVTLILVGLTDDPNWQVIIFLFLFLTYFLSVIGNLTI

ILLTLLDSHLKTPMYFFLRNFSFLEISLTTVCIPRYLFSIVTMDKTISYD

ACATQLFFAIFLGASEFFLLAAMSYDRYVAICQPLHYATIVSSRVCTQLV

VTSWVAGLLTISPGLIMGLELEFCDANIIDHFFCDYSPVLKLSCTDTRSI

ELLGFISAIVILLITLALVILSYAYILRTILKIPSAQQRKKAFSTCSSHM

IVVSLSYGSCSFMYMKPSAEERVALNKGVAILAISIAPVLNPFIYTLRNK

QVKQALKDIIKKGVFITLR*

>LoafORs2.106

MKNQSSLKEFILLGLTDDPELNILIFHFLFFTYILSITGNLAIITLTLID

PCLKTPMYFFLRNFSFLEISFTTVCIPRFLVSIITGNMTISYNSCMAQVF

FFVLFGATEFFLLTVMSYDRYVAICKPLHYTAIMNSRVCIQLVISSWLAG

FPIIFPAVILELQLDFCDSNIIDHFTCDSSPMLLISCTDTAFLELLGFLL

AVVTLVVTLTFVILSYALILRTILRIPSAEQRKKAFSTCSSHMIVVSISY

GSCIFMYVKTSAKEGVAFTKGIAVLNTSVAPMLNPFIYSLRNQQVKQAFK

NVIKRCFTNKFQS*

>LoafORs2.107P

FFLWNFSL*QLSLTSTCTPTYLVSIATKTKQLPIMLVQPSQF**FYLGHR

SSSH*WQCLMTALWPTANPSIQSP*AAESYSSWCLALGWLHFRKSCQVQL

WVSSRTSVMAIPLIIFYVTMGLSFTNLADTRVIESFCFILALVTLLVTLI

LVIFFYTLISKTMLKIPSEQNKKKAFSTCSSHTIAISISYGSCIFMYINL

LPLNKSVMVLSTSIAFLLN

>LoafORs2.108P

MRNETSIREFVLLGLTHDPELQVVMLFFMLFTYLLSVSGNMTIISLTLSN

VCLKTHMYFFLRNFSFLEISFTTVCIPRFLVSIATGDTTISYNACMTQVS

FF/FFLILLGATEFFLLAVMSCDCYMAICKPLHYTTIMNDKVCIQLVIGS

*LAGFLVIFPPVIMGLQLDFCDSNIFDHFIC*SSPMFLIACTDTKFLEFM

AFFLAVFTLMATLAVVILSYTLILRTILKIPSAQQMKKAFSTCSSYMIVF

SISYKKWELHFHVCTNVSKRRCGFEQRCSSA*YLCCSRVESLYLYLLRNQ

QVKQTLKDLIK

>LoafORs2.109

MKNRTSVTDFILLGLTDNPEVQVVIFFFLFLTYLLSVTGNLIIITLTLLD

SHLKTPMYFFLRNFSFLEISFTSVCNPRFLVSIITGDKSISYNACAVQLF

FFIFLGSTEFFLLAFMSYDRYVAICKPLHYTTIMSSKICYQLVISSWLAG

FLVIFPPLIMGLELDFCDSNIIDHFTCDSAPLLQISCTDTSTLELMSFVL

AVFTLCHSFHSNSLLHYIRRTILRLPSAHKEKKAFSTCSSHMIVVSISYG

SCIFMYVKTSATEGVALTKGVAMLNTSAAPMLNPFIYTLRNQQVKQAFKD

IIKKTLSSETLI*

>LoafORs2.110P

EFRRNLTMRNHTMVTTFILVGLTDDPNWQIVIFLFLFLTYLLSVTGNLTI

AMLTLLDSHLKTPMDFFLRHFSFLEMSFTSDWIPRYLVSIVTMDNRISYD

ACMT*LFFAIFLGAIRVF/SEFFLLTAMSYDRYVAIFKPLHYATIMNNRV

CTQLLITSWLAGLLTISPGLIMALRLEFCDANVIDHFGCDYSPLLKLSCT

DTRVIELLSFILAIATLLITLALVILSYAYILRTILKIPSAQQRKKAFST

CSSHVIVVSISYGSCIFMYMKPSAEERVALNKGVAVLNISIVPLLNPFI*

KKLRNKQIKQALKEVIKRCIFII*N

>LoafORs2.111

MRIHTMVTTFILQGLTDDPNWQMVIFLFLFLTYLSSVIGNLTIILLTVLD

SHLKTPMYFFLQNFSFLEISVMSLCIPRYLFSIMTMDKMISYDACATQLF

FAIFLGAPEFFLLAAMSYDRYVAICQPLHYATIMSSRVCTQLVVTSWVAG

LLTISPGLIMGLGLEFCDANIIDRFFCDYSAVLKLSCTDTWVIELLSFIL

AIFTLLITFALVALSYANIVRTILKIPSAQQRKKAFSTCSSHMIVVSISY

GSCIFMYMKPSAEERVALNKGVAVLNTSVAPLLNPFIYTLRNKQVKQA*

>LoafORs2.112

MKNRSSVKEFILLGLTDDPELNILIFLFLFFTYVLSITGNLTIITLTLID

SHLKIPMYFFLRNFSFLEISLTTVCIPRFLVSIITADKTISYNSCMAQVF

FFILFGSTEFFLLTVMSYDCYVAICKPLHYTTIISSRICLQSVIISWLAG

FLIIFPPVIVGLQLDFCDSNIIDHFTCDYSPMLLIACTDTTFLQLMGFVI

AIFTLVLTLSLVILSYAFILRTILKIPSAEKRKKAFSTCSSHMFVVSISY

GSCIFMYVKTSAEEGLAFTKGIAVLNTSVVPMLNPFIYSLRNQQVKQAFK

NLVQRCFSNKFWL*

>LoafORs2.113

MRNHTIITTFILVGLTDDPNWQMVIFLFLFLTYVLSVTGNLTIILLTLLD

PHLKTPMYFFLWNFSFLEMSLTSVCIPRYLVSILTMDKTIYYDACAVQIF

FAIFLGASEFFLLASMSYDRYVAICKPLHYTTIMSSRVCTQLVITSWVAG

LLTIFPGLIMGLKLDFCDANIIDHFYCDYAPVLKLSCTDTGVFEMLGFIL

AILILLITLTLVILSYAHIIRTILNIPSVQQRKKAFSTCSSHMIVVSISY

GSCIFMYIKPSAEERVALNKGIAVLNLSLAPVLNPFIYTLRNKQVKQALK

DIIQKHNFINLKQ*

>LoafORs2.114

MEFKRNLTMRNHTAVTFVLVGLTDDANWQIVIFLFLFLTYFLSVTGNLTI

ILLTLLDSHLKTPMYFFLRHFSFLEMSFTSVCIPRYLVSIVTLDNRISCD

ACMTQLFFAIFLGASEFFLLAAMSYDRYVAICKPLHYVTIMNNRVCTQLV

ITSWLAGLLTISPGLIMGLGLEFCDANIIDHFACDYSPVLKLSCTDTRVM

ELLGFILAIFTLMITLALVVLSYVNIVRTILKIPSAQRRKKAFSTCSSHM

IVVSISYGSCIFMYIKPSAEERVALNKGIAVLNTSIAPLLNPFVYALRNK

QVKQALKDIIKKRIFIALNK*

>LoafORs2.115

MKNYTEVTKFILLGLSDDPKLQVVIFVFLFITYMLSITGNLTVISLTLLD

SHLQTPMYFFLRNFSLLEVSFTTVSIPRFLGTIITGDKSISFDDCMAQLF

FYILLGVTEFYLLAAMSYDRYVAICKPLHYTTIMNGRVCTLLVFFSWLAS

FLIVFPALMLVIQLGYCKSNVINHFTCGYFALLHLSCSDTKFLELTGFSC

AVFTLMFTLALIILSYIYIIRTILSIPSTSQRTKAFSTCSSHMIVISISY

GSCIFRYINPSAKDRVSLSKGVAVLNTSVAPMLNPFIYSLRNEQVKQAFM

DLLRKIEFFSSK*

>LoafORs2.116

MEFRRNLTMRNHTKVKTFILVGLTTDPNWQIVIFLLLFLTYLLSVTGNLT

IVLLTLLDSQLKTPMYFFLRNFSFLEMSFTSDWIPRYLLSIVTKNKTISY

DACMTQLFFAIFLGASEFFLLTAMSYDRYVAICQPLHYVTIMNNRVCTQL

VVTSWLGGLLAISPGLILCLRLEFCDANIIDHFGCDYSPVLKLSCSDTRS

IELLGFISAIVILLITLALVILSYAYILRTILKIPSAQQRKKAFSTCSSH

MIVVSISYGSCIFMYMKPSAEERVALNKGVAVLNNSIAPLLNPFIYTLRN

KQVKQALKDMIKRRIFST*

>LoafORs2.117

MEFRRNLTMRNHTMVATFILVGLTDDQNWQTVIFVFLFLTYLLSVTVNLT

ITVLTLLDAQLKTPMYFFLRNFSFLEMSFTSVCIPRYLVSIVTMDKTISY

DACMTQLFFAIFLGASEFFLLTAMSYDRYVAICQPLHYVTIMNNRVCTQL

VVTSWLGGLFAISPGLILCLRLEFCDANIIDHFGCDYSPVLKLSCTDTRS

IELLGFISAIVILLITLALVILSYAYILRTILKIPSAQQRKKAFSTCSSH

MIVVSISYGSCIFMYMKPSAEERVALNKGIAVLNTSIAPLLNPFIYTLRN

KQVKEALKDIVQKCIITLKNSFFFLKETKGH*

>LoafORs2.118P

RTQSREIQFIPLGLTDDPQLQIVMFIFLFLNYILSVMGNLSIILLTLLDP

RLKTPMYFFLRNFSFLEILLITICIPRFLTTIVTKNKIISYNDCVSQLFF

FLFLGVTEFYLLAAMSYDRYVAICKPLHYPFIMRSKVSYELVLSSWTAGF

LITFPPLVMGLKLEFCASKVIDHFMCDTSPILQISCTDTHFLEMISFVSV

VVTLVVTLLLVILSYTYIVKTILKIPSAQKRTKAFSTCSSHMAVVSLTYG

SCIFIYMKPSAKERVTLSKGVAVIYTSVAPLLNPFIYSLRNQQVKQAFKD

TLKKVFIFLKNKEK

>LoafORs2.119P

FVLLGP*DDPNLQFVIFVFLFITYMLSITGNLTIITLTLLDSHLQTPKYF

FLRSFSLLEVSFTTVSIPKFLGTIITGNKTISFNDCMTQLFSFIFLGVTE

FNLLAAMSCDCYVAICKPLHYTTSMNGRVCTLLVFTSWLASFLIIFPLLM

LFTQLDYCKSNVIEHFTCDYFPLL*LSCSDT/LSYSDTKFLELTGLSCAV

FTLMFTLTLVILSYIHTIRTILRIPSTSQGTKAFSTCSSHMIVISISYGS

CIFMYINLSAKGRVSLSKRVAVLNISV

>LoafORs2.120

MRNHTAITEFVLLGLSDDPKLQIVIFVFLLITYMLSITGNLTIITLTLLD

SHLQTPMYFFLRNFSLLEVSFTTVSIPRFLGTIITEDKTISFNNCIAQLF

FLILLGVTEFYLLTAMSYDRYVAICKPLHYVTIMNRRVCTLLVFSSWLAS

FLIIFPVLMLLLKLDYCRSNIIDHFTCDYFPLLQLSCSDTKSLEIMGFSY

AVFILIFTLALVILCYIYIIRTILRIPSASQRTKAISTCSSHMIVLSISY

SSCIFVYVKPSAEERVALSKGVAVLNISVAPMLNPFIYSLRNQQVKQAFM

DMVRRTVFFTSK*

>LoafORs2.121P

QFVLLGIAEDPKLQVVIFIFLFIAYVLSITGNLTIVILTLIDCPLNTPVY

CFLRNFSFLEITFTTVSIPRFLGAIITKVKNISYNNYLARLFFFIFMGVS

EFFLLTAMSYDHYVAICKPLHYTTIMKKKICALLLLCSWLRGFLTIFPPL

MLILQLDFCSSSVIDIVTTPPSYNSHARIPGF*R*LAVNFPFVPLPFTLA

LVILSYLCTVITVLRTPSASQRKEAFSTCSSHMIVISIS

>LoafORs2.122P

MKNQSREIEYILLGLMDDPQLQIVIFIFLLLNYILSMMGKLFIILLNLLN

PHLKTSM*FFL*NFPLAILLTTTCIPRFLTTIVTKNKIVSYNNCASQLFF

FLLLGVTEFYLLAAMSYDHYVAICKSLHYPTIMRNKVCYQLVLSSWAAGF

LNIFPP*VLGLKLEFCASKVIGHFLCDTSPLLQISCTNTSFLELASFLSA

GIILVATLLLVIFSLYIYNQGHSKNPLCSEKNKNFFHLFFLHDCSLPYLR

*LYLHLHEPSAK*RVTFFFKGVAVIYTSVAPALNPFIYILRNPE

>LoafORs2.123

MKNQSREIEFILLGLTDDPQLQIVIFIFLFLNYILSVMGNLSIILLTLLD

PRLKTPMYFFLQNFSFLEISLTTICIPRFLTTIVTKNKIISYSGCASQLF

FFLLVAITEFYLLAAMSYDRYVAICKPLHCPIIMRSQVCYQLVLCSWAAG

FLNTFPPLLMGLKLEFCASKVINHFMCDTSPILQISCTDTHFLELISFVS

SAIILVVTLLLVIFSYTYIIKIILKIPSAQKRTKAFSTCSANMTVVSLTY

GSCIFIYMKPSAKERVSLSKGVAVIYTSVAPLLNPFIYSLKNQQVKQASK

DTLRKIFIFFQKIHKRFKS*

>LoafORs2.124P

MKNQSLEIKFILLGLTDDPQLQIVIFFSFSFSTMRLMLWGT*LLPSLPCW

MKVSRLQCILFSKISPVHNSVHSQIPNNHCD*RQNPFL**LCSSIIFHLF

TGSYRIYLLAAMSYDCYVAICKLLHYPIIMSSRVCYQLVLSSWVIGFLII

FPPLIMGLKLDFCVSKIIDLFSCETSILQISCTDTCVLELMSFVLVVMTL

VVTLVFVILSYTYIIRTILKFPSAQQ/RAFSTCTSHMIVVSMTYGSSTFM

YIKLSAKERLTVSKGIALLYTSVAPLLNSFIYTLMNQQVKEVCRDILQKI

LCFSKK

>LoafORs2.125

MEFRRNLTVRNHTMVTTFILVGLTDDPNWQVIIFLFLFLTYFLSVTGNLT

IILLTLLDSHLKTPMYFFLRNFSFLEISLTTVCIPRYLFSIMTMDKMISY

DACVTQLFFAIFLGASEFFLLAAMSYDRYVAICQPLHYATIMSSKVCTRL

VVTSWVAGLLTISPGLIMGLGLEFCDANIIDHFCCDYSPVLKLSCTDTWS

IELLSFILAIVILLITLALVTLSYACILRTILKIPSAQQRKKAFSTCSSH

MIVVSLSYGSCIFMYMKPSAEERVALNKAIAVFTISVAPVLNPFVYALRN

KQVKQALTDIIKKGILITLL*

>LoafORs2.126P

VFSFFSTLAIITPTLLHSHIKTPMYFFLWNFSF*ELSVTSTCTPTYLVSI

ATKTKQLPIMLVQPS*F**FYLGHQSSH*H*YLMTAMWPSANPHQRAVES

YSSWCLALGWLHFRKSCQVPLWVSSWTSVMAIPLIIFYVTMGLSFNNFAD

TRVIESFSFILVLVTLLVTLVLVIFPYTLISKTILKIPSAHIKKAFSTCS

SQTIAISISYGSCIFMYINLSAQERVALNKGVMVFNTSIASLLN

>LoafORs2.127

MRNHPMVTTFIVVGLTDDPNWQIVIFLFLFLTYLLSVTGNLAIILLTLLN

SQLRTLKYCFLRHFSLLEMSFTSVRIPRYLVSIVTTDNMISYGSCVTQLL

FVIFFGASEFFLLTAMCYDCYVAICKPLHYATVVNNRVCAQLVVTSWLAG

LLTISPGLIVCLGLEFCDTNIINHFGCDYSPVLKLSCTDTCSIELLGFIS

AIVILLITLALVMFSCAYILRKILRIPSAQQRKNAFSTCSSHMIVVSITY

GSCIFRYIKPSAEESVALNKGVAVLNTSIAPVLNPFIYPLRNKQVKQALK

VIVQKCIITLKKL*

>LoafORs2.128P

MEFRRNLTMRNHTMVTTFILVGLTDDPNWQIVIFLFGIYLFSVTGNLTII

LLTLLDS*LKTPMYFFLRHFSFLEMSFISDWIPRYLVSIVTVDNMMSYEA

CIAQLFFAIFLGASEFFLLSAMSYDCYVAICKPLRYATIMNNRVCTQLVV

TSWLAGLLTISPGLILCL*LEFCDANIIDHFACDYSPVLKLSCTDTQSIE

LLGFITAFVIRLITLALLTLSYAYILRTILKIPSAQQRKKAFSTCSSHMI

VVSISYGSCIFMYMKPSTEERVALNKGVAVLNTSISPLLNPFIYTLRNKQ

VK*ALKDVIKRCIFIT

>LoafORs2.129

MRNQTALTTFILLGLTDDPQLQILIFIFLFLSYMLSVTGNLTIIILTLVD

SHLKTPMYLFLQNFSFLEISFTTACVPRFLYSISSGDRSITYGACASQLL

FIDLFAVTEFFLLATMSYDRYVAICKPLHYTTIMSNRVCKNFILFCWAAA

LVIILPPISLGLGLEFCDSNVIDHFCCDASPILKISCSDTWLIEQMVIAC

AVLTFIITLMCVVLSYIYIIRTILRFPSAQRKKKAFSTCSSHMIVVSITY

GSCIFIYVKPTAKDEVAINKGISLLITSISPMLNPFIYTLRNKQVKQAFN

DSMKKKCTLLKDVKVKGRLMNPIKREDEWSQT*

>LoafORs2.130

MRNHTAITTFILLGLTEDPQLQVLLFIFLLTTYVLSVTGNLTIITLTLVD

PHLKTPMYFFLQNFSFLEISFTTACVPRFLYSISTGDRTVTYNACAIQLF

FTDLFGVTEFFLLATMSYDRYVAICKPLHYMTIMSKKVCKTMVICCWMAA

FMIILPPLSLGFNLEFCDSNVIDHFGCDASPLLKISCSDTWLIEQMVIAC

AVLTLIITLVCVVLSYIYIMKTILKFPAVQQRKKAFSTCSSHMIVVSITY

GSCIFIYVNPSAKEEVEINKGVSVLISSISPMLNPFIYTLRNKQVKQSFN

DSLKKIASLSKK*

>LoafORs2.131P

MSYDSYVTI*KPLHCMSITSNKICRTMVICCWMRAFMIILPPLGLHLNLE

FCDSTAIDHISCEASPILKISCLDTWLIEQMVIACAVLTLIITVVCVALS

YIYVMKTILKFPSVQQRKKAFST*SAHMIIVSITYGSCIFIYVNPSAKKS

RN**RCVSTHFIHITNVESFHIYS

>LoafORs2.132

MRNHTAVTTFILLGLTDDPQLQVLVFIFLFPTYILSVNRNLTIIILTLMD

SHLKTPMYFFLRNFSFLEISFTTVCIPRFLYSISTRDNTITYDACASQIF

FIGLFGATEFFLLAAMSYDRYVANCKPLHYMTIMNSRVCTILVLCCWISG

LMIIITPLGMGLQLEFCDSNAIDHFGCDAAPLFKISCSDTWFIEQVVIIC

AVLTFIITLIGVVLSYMYIIKTILRFPSTQQRKKAFSTCFSHMIVVSITY

GSCIFIYIKPSAKEDVDINKGVSMLTTSVAPLLNPFIYTLRNKQVKQSFN

DMI*

>LoafORs2.133

MKNHTKNIEFIPLRLTGNSQLQIVIFLFLLLSYMLSMIRNLTTIALTLLD

SHLKTPMYFFLCPFPFLEISFTTVFILRFLITTVTREKTISYNGRMSQLF

FYIFWGVTESFLLAAVSYDRYVAYCKPLHCTSVMSSGLCHQLALSPWVTA

FLVIFPPLFLCLHLDCCASNIIDPFICDISPNFQLSCSDTHLLESIAFLI

ALIKIIVTLVLVIIFYSYIMKKIVKFSSAQQKKKAFSTCSSHMIVVSITY

GGCIFIYIKPAANERVTLSKGVAVLSTSVAPLLNPFIYTLRNQQVKQGYN

CPIECAVYNLFFFFSLWY*

>LoafORs2.134

MRNHTAITTFILLGLTDDPQMKALLFTFLFFTYILSVTGNLTIITLTLVD

SHLKTPMYFFLRNFSFLEVSFTTVCIPRFLYSISTGDNTVTYNACASQIF

FVFLFGATEFFLLAAMSYDRYVAICKPLHYMTIMSNKVCVLLVLCCWVAG

LMIILPPLSLGLQLEFCDSSAIDHFSCDAGPLLKISCSDTWLLEQLIILV

AVFALIITLVCVFLSYTYVIKTILRFPSVQQRKKAFSTCSSHMIVVSITY

GSCIFIYIKPSAKEEVAINKGVSVLTTSVAPLLNPFIYTLRNNQVKLAFN

DSVKKIAFLSKK*

>LoafORs2.135

MEFRRNLTMKNLTMVTTFIFVGLTDDPNWQIVIFLFLFLTYLLSITGNLT

IILLTLLDSHLKTPMYFFLRNFSFLEISLTTVCIPRYLFSIMTMDKTISY

DACATQLFFAIFLGASEFFLLAAMSYDRYVAICQPLHYATTMSSRVCTQL

VVTSWSTGLLTISPGLIMGLGLEFCDANIIDHFFCDYSPLLKLSCTDTWV

IELLSFILAIATLLITLALVILSYACIIRTILKIPSAQQRKKAFSTCSSH

MIVVSLFYGSCIFTYIKPSAEERVAFNKGVAILTISIVPVLNPFIYTLRN

KQVKQALKDIIKKCILIALR*

>LoafORs2.136

MKNQSSVKEFILLGLTNDTELNILIFLFLFLTYILSITGNLTIITLTLID

SHLKTPMYFFLRNFSFLEISFTTVCIPRFLVSIITADMTISYNSCMAQVF

FLILLGSTEFFLLTVMSYDCYVAICKPLYYTTIMNSRVCIQLLISSWLAG

FLIIFPPVILGLQLDFCDSNIIDHFTCDSSPMLLISCTDTAFLELLGFLL

AVVTLVVTLTFVILSYALILRTILRIPSAEQRNKAFSTCSSHMIVVSISY

GSCIFMYVKTSAKEGVAFTKGIAVLNTSVAPMLNPFIYSLRNQQVKQAFK

NLLKGCFSNKFQS*

>LoafORs2.137P

MKNHTGKIGFILLGLTDNFQLQTVIFLFLFLSYLLSMIGNLTIIALTLLD

SHLKTPVYFFLRNFSFLEISFTTACIPRFLITILSKEKTISYNGCAFQMF

FLYLFWG/FFYIFSGVTEFFLLAAVSYDRYVAICKPLHYTSVVSSRLCHQ

LVLSSWVTAFSVIFPPLTLGLNLDFCASNIIDHFICDISPVLQLSCLDTH

LLELIGLLIALMTLIVILLLVIISYPYIIKTILKFPSAQQKKKAFSTCSS

HMIVVSITYGCCIFIYIKPSANERVTLSKAVGVLSTSVCPIVEP

>LoafORs2.138P

MKNHTKNMEFIPLRLTGNSQLQIVIFLFLLLSYMLSMIRNLTTIALTLLD

SHLKTLMYFFLCNFSFLEISFT/QFLNTTVTREKSISYNGRMSQLFFYIF

WGVTESFLLAAVSYDCYVAICKPLHCTSIMSSRLCHQLVLNPWVTAFLVI

FLPLILCLNLDFCASNIINHFICDISPILQSLSHYY**SFLIPISSRQF*

NSVQLSKRKKAFSTCPSHMIVVSITYGGCIFIYIKPAANERVTLSTGVAV

LSTSVAPLLNPFIYTLRNQQVKQGF

>LoafORs2.139P

CQSNTFFFGLFGATEFFLLAAMSYDRYVAICKPLHYTTIMNSRVCTVLVL

CCWISGLMIIITPLGMGLQLEFCDSNAIDHFGCDAAPFFKISCSDTWFVE

QVVIICAVLTSIITLIGVVLSYVYIIKTIVRFPSTPQRKKAFSTCSSHMV

VVSITYGGCICIYIKPSAKEDVDINKGVSVLTTSVAPLLNPFLYTLRNKK

VKQSFNDI*K

>LoafORs2.140P

MFCDRFVTIYKPLHYMTIMSNKICETMVICCWMTAYMIILPPLGLGVKLK

FCDSTAIDHIGSDVLPILKIPRSGTWLIEQMVIACAVLTFIITLVYVAFS

YIYIMKTILKFPSVQQKKKAFSTCSAHVIVVSITYGSCIFIYVKRSAKEE

GETNKGVAVLISPVSPVLNSFIYTLRNKQVK*AF

>LoafORs2.141

MQALLSPEVNNEKPHSNNDIHPSGTDRRSSAAGFAFYFPTYHLRVECNWK

SDHHHPTLVDPHLKTPMYFFLQNFSFLEISFTTACVPRFLYSISTGDRTI

TYNAYAIQLFFTDLFGVTEFFLLATMSYDRYVAICKPLHYMTIMSNKVCK

TMVICCWMAAFMIILPPLSLGFNLEFCDSNVIDHFGCDASPLLKISCSDT

WLIEQMVIACAVLTFIITLVCVALSYIYIMKTILKFPSVQQRKKAFSTCS

SHMIVVSITYGSCIFIYVNPSAKEQGEINKGVSVLISSISPVLNPFIYSL

RNKQVKQSFNDSLKKIAFLSKKCT*

>LoafORs2.142

MRNQTALTTFILLGLTDDPWLQILTFIFLFLSYMLSVTGNLTIIILTLVD

SHLKTPMYLFLQNFSFLEISFTTACIPRFLYSMSSGDRSITYGACASQLL

FIDLFAVTEFFLLATMSYDRYVAICKPLHYTTIMSNRVCKNFILFCWAAA

LVIILPPISLGLGLEFCDSNVIDHFCCDASPILKISCSDTWLIEQMVIAC

AVFTFIITLMCVVLSYIYIIRTILRFPSAQRKKKAFSTYSSHMIVVSITY

GSCIFIYVKPTAKDEVAINKGISLLITSISPMLNPFIYTLRNKPVKQAFK

DSMKKKCTLLKDVKVKGRLMNPIK*

>LoafORs2.143

MRNHTRLTTFILLGLTDDPQLQVLIFVFLLVTYMLSVTGNLTIIILTLVS

SQLKSAMYFFLQNFSFLEIAFTTVCIPRFLYSMSTGDNTITYNACATQLF

FIFLLGSTEFFLLAIMSYDRYVAICKPLHYVTIMSGRVCRRFVLFCWVDG

LLIITPSLCLGLNLEFCDSNVIDHFLCDASPILKISCSDTWFLEQMVIAC

AVMTFIMTLMCVLLSYIFVIKTILKFPSAQQRKKAFSTCSSHMIVVSITY

GSCIFVYIKPSAKEEVDVNKGVIVLTTSIAPMLNPFIYTLRNKQVKQALN

DAIKRIAFLSKK*

>LoafORs2.144

MSMMRNHTSVTTFILLGLTDDPQMKVLIFIFLFVTYTLSLTGNLTIIILI

LVDSHLKTAMYFFHQNFSFLEISFTTVCIPRFLYSLSTGDNTITYNACFA

QIFFIFFLGAIEFFLLAIMSYDRCVAICKPLHYVTIMTRRVCGKLVFCCW

IAGFLVIITPLCPLLPLEFCNYNVIDPFRCDVPPLLKISCSDTWFMEQMT

VAVAVVTTIMALLCVVLSYMYIIKTIIKFPSAQQRTKAFSTCSSHVIVVS

MTYGGCIFIYIKPSAKEGVAINKGVALLTISFAPVLNPFIYTLRNKQVKH

AFIDLIKRISFISHK*

>LoafORs2.145P

MRNHARLMTFILLRMTDAPQLQVLIFTFLLVTYMLSVTGNLSIIFLTLVS

SQLKSAIYFFLQNFSFPDISFTTICIPRLLYSTSTGDNTITYNACATQLF

FFFLGSTEFFLLSIMSYDCYVAICKPLHYVTIMSGRVCRRLVLFCWVDGL

LIITPSLCLGLNLEFCDSNVIDHLPCDASPILKISCSDTWFLEQMVIACA

VMTFIMTLTCVLLSYVFITKTILKFPSAQQRKKPF

>LoafORs2.146P

NVCAFQLFFTYPFGITEFFLLATTSFDCYVFICKPLHYVTIRNNKVCNRF

VLSCWMAGLLNIIP/PLSLGLNLKFCDSNVMDHFFCDATPFLMISCLDTW

FRERLILVCSVLTFIMTLVV/VVLSYMYVITTILRFPSAQQRKKPFSTIL

STCLVSMTY*SCNFIYLKPSSKEEVALNRGASLLITSLSPVLNPFIYTLK

NKQMKKAFNDSIKR

>LoafORs2.147P

MENYTITTFILLGLTDDPQL*VLIFIFLFFTYMLSVTRNLTINTLTFVDA

QLKTPMCFFLQNFSFLEISFTSACIPRYLYNIATGDNVI/TYNACVIQLF

FTDLFAVTEFFLRAAMSYDRYVAICKPLHYKTIMSSRVCKKLLLCCWLAG

LLIIISPLSLGLNLKFCDSNVVDHFLCDALPLLKISCSGTWFMEQTIIIC

TVLTLILTLMGVVLSYTYIIKTILGIVSNRQKRRAFSTCSSHMIVVSITY

GTCMFIYMNPTAKEEMTTNKVVSLLISPISPMLNPFIYTLRNKQVENAFK

DSIKRTA

>LoafORs2.148P

MRNGTVTSFILLGLTDDPQLQVLIFIFLFLTYMLSVTGNLTIITLTFVDS

HLKTPTYFFLKNFSFLETSFTSACIPRYLYNIATGNKVITYNACVIQVFF

TDLCGVTEFFLLAATSYDRYVAICKPLHYMTIMSSRACRILIICCWMAGF

CVIIPPLSLGLNLEFCDSNVLDHFVCDAYPLVKISCSETWTVEQTVIICA

VLTLNMT*LCGSVIR*YHQDNI*ILLCPTKEKGLFNLFCPHDVVSITYGT

CILIYMNPTAKEKVTINKVVSLLISSVSPTLNPFIYTLRNNQVKKALKCS

IKRLLLLSTK

>LoafORs2.149P

MRNGTVTSFILLGLTDDPQLQVLIFIFLFLTYMLSVTGNLTIITLTFVDS

HLKTPMYFFLKKFFLL/FFLKNFSFLEISFISACIPRYLYNIATGNKVIT

YNACVIQVFFTDLCGVTEFYLLAAMTYDRYVAICKPLHYMTIMSSRACRI

LIICCWMAGFCVIIPPLSLGLNLEFCDSNVLDHFACDAFPIMKISCSDTW

IIEQAVIICAVLTLNMTLTCVVLSYGSIIRTIFRFSSVQQRKKAFSTCSS

HMIVVSITYGTCFFIYMNPTSKEEVTINKVVSLLISSISPTLNPFIYTLR

NNQVKKVFRNSMKRLALLSNK

>LoafORs2.150

MRNHTVTNFILLGLSNDPQLKVVIFIFLFLTYILSVTGNLTIISLTFIDS

RLKTAMYFFLQNFSFLEISFTSACIPSYLYNISTGDRTITYDNCAIQIFF

IDLFAVTEFFLLATMSYDRYIAICKPLHYVTIMNNKVCRRLILCCWTAGL

LIILPPLSLGLSLEFCDSNVIDHFACDASPLLKISCSETWLIEQVVMVCA

VLTFITTLVCVVLSYVYIIKTILRFSSAQQRKKAFSTCSSHMTVVSITYG

SCIFIYIKPSPKESVSINKGVTVLTSSISPMLNPFIYTLRNKQVKQAFND

SIKRIALLLKKLRNSQTESN*

>LoafORs2.151

MRNGTVTSFILLGLTDDPQLQVLIFIFLFLTYRLSVTGNLTIITFTFVDS

HLKTPIYFFLKNFSFLEISFTSACIPRYLYNIATGNKVITYNACMSQVFF

TDICGTTEFFLLAAMSYDRYVAICKPLHYMTIVSSRVCGILITCCWMAGF

CVIFPLICLCLNLEFCNSNVLDHFACDAFPLVKISCSNTWIIEQTVIISA

VLTLNMTLTCVVLSYGSIIRTIFRFPTVQQRKKAFSTCSSHMIVVSITYG

TCIFIYMNPTAKEEVTINKLVSLLISSVSPTLNPFIYTLRNNQVKKAFKG

SFERLALFSTK*

>LoafORs2.152

MRNGTVTSFILLGLTDDPQLQVLIFIFLFLTYILSVAGNLTIITLTFVDS

HLKTPMYFFLKNFSFLEISFTSACIPRYLYNIATGNKVITYNACMSQVFF

TDICGTTEFFFLAAMSYDRYVAICKPLHYVTIMSSRACRILTICCWMAGL

CVIIPLLSLCSNLEFCGSNMLDHFTCDEFPLVKISCSTTWIVEQTVNISA

VLTLNMTLTCVVLSYGSIIRTIFRFHSVHQRKKALSTCSSHMIVVSITYG

TCIFIYMNPTAKEEVTINKVVSLLFSSASPTLNPFIYTLRNNQVKKAFKD

SFERLASLSTK*

>LoafORs2.153

MRNGTVTSFILLGLTDDPQLQVLIFVFVFLTYILSVTGNLTIITLTFVDS

HLRTPMYFFLKNFSFLEISFTSACIPRYLYNIATGDKVITYNACMIQVFF

TDICGATEFFLLATMSYDRYVAICKPLHYVTIVSSRVCRILINCSWMAGF

CVIVPLLSLCLKLEFCDSNVLDHFACDAFRLVKISCSDTWIIEQTVIVCA

VLTLNMTLTCVVLSYGSIIRTIFRFPSVQQRKKAFSTCSSHMIVVSITYG

TCFFIYMNPTAKEEVIINKVVSLLISSVSPTLNPFIYTLRNNQVKKAFKD

SFKRFISLSTK*

>LoafORs2.154

MMRNQTITIFLLLGLTDDPQLKVVIFIFLFLTYMLSVTGNLTIISLTFMY

SHLKTAMYFFLQNFSFLEISFTSACIPRYLYNISTEDRTITYDNCAIQIF

FTDLFGVTEFFLLATMSYDRYVAICKPLHYVTIMNNKVCRRLILYCWTAG

LLIILPPLSLGLNLEFCDSNVIDHFACDASPLLKISCSETWLIEQVVIVC

AVLTFIMTLICVVLSYVYIIKTILQFPSAQQRKKAFSTCSSHMIVVSITY

GSCIFIYVKPSVKNSVAINKGVMVLTTSIAPVLNPFIYTLRNKQVKEAFN

DSIKRIALFLKK*

>LoafORs2.155

MMRNNTITFILLGLTDDPQLKVVIFNFLFLTYMLSVTGNLIIIFLTLNNS

HLKTAMYFFLQNFSFLEISFTSACIPRYLYNMSVGDRTITYNDCIIQMFF

TDLFGVTEFFLLATMSYDRYVAICKPLHYVTIMNNKVCRRLILYCWTAGL

LIILPPLSLGLNLEFCDSNVIDHFACDASPLLKISCSETWLIEQVVIVCD

VLTFITTLVCVVLSYVYIIKTILQFPSAQQRKKAFSTCSSHMIVVSITYG

SCIFIYVKPSAKNSVAINKGVMALTTSIASVLNPFIYTLRNKQVKQAFND

SIKRIALFLKKKINLLM*

>LoafORs2.156

MKNHTITTFILLGLTDDPKLQIPIFIFLFLAYMLSITGNLTIISLILMDS

HLKTPMYFFLQNFAFLEISFTSACIPRYLYNIATGDRLITYNICVIQVFF

TDVFGVTEFFLLAIMSYDRYVAICKPLNYVTIMSSRVCKTLVLCCWMAGL

LIVFPPLTFFKTLKFCDSNLIDYFYCDASPILKISCSDTWFIEQFVIVCA

VLTFILTLICVVLSYIYIVKTILRFPSAQQRKRAFSTCSSHMIVVSITYG

SCIFIYVNPSAKQSVAINKAVTVLMTSIAPMLNPFIYTLRNKQVRQAFSD

SFKRIAFVTKK*

>LoafORs2.157P

FLAKFVFLRNLVYICLYSQRLVKVSTGDKIYMTTVSFYLLLLFFTDFFAV

TDFFPPAIMSYD*YIASCKPLHYMTIMNNKVRS*LVLCCWTAGLLIILPL

RSLGLNLEFSDSNVIDHFVCDAAPLLNISCSETWFIEQ/VVIVCALLTFV

MTLICVVLSYVYIIKTILQFLSAQQRKRAFSTSSSHMIVVSITYGSCILI

YVKPSAKNSMAINKGEMVLITSITPMLNAFIYTLGNKQVKQAFNDSIKRI

ALFLKK

>LoafORs2.158P

MTCRLDRSQESVMTNHTVMTFILLGLTDDPQLQVLIFIFLFLTYMLSVTG

NLTVITLILLDSHLKTAMYFFLQNFSFLEISFTSACIPRYLYNIGTGDKL

ITYSACATEVFFTDLFGVTEFFLLAAMPYDRCMAICKPLHYVTIMNSTVC

RRLVFCCWAAGLFIIIIIIPPLILGLNLEFCNYL*CNSPPEDLLI*YLVH

E*MV*SVLC*LSL*HLCVSSCPTFVSSRQF*NFHLLSKRKKPFLLVLPT*

FWFLSPMAAASSSTLNLQQNNSVAINKGVTVLTTSIAPMLIPFIYTLRNK

QVK*AFSDSIKRIVIFSKK

>LoafORs2.159

MKNHTITTFILLGLTDDPKLQIPIFIFLLLMYMLSISGNLTIISLTLVDS

HLKTPMYFFLQNFAFLEISFTSACIPRYLYNIATGDRSITYNICVIQVFF

IDVFGVTEFFLLAIMSYDRYVAICKPLHYVTIMSSRVCKTLVLCCWMAGL

LIIFPPLTLLLNLKFCDSNVIDYFVCDAPPILKISCSDTWLIEQLVIVCA

VLTFILTLICVVLSYIYIVKTILRFPSAHQRKRAFSTCSSHMIVVSITYG

SCIFIYVNPSAKQSVAINKGVTLLMTSIAPMLNPFIYTLRNKQVRQAFSD

SFKRIAFVTKK*

>LoafORs2.160

MKNHTITTFTLLGLTDDPKLQIPIFIFLLLMYMLSISGNLTIISLTLVDS

HLKTPMYFFLQNFAFLEISFTSACIPRYLYNIATGDRAITYNICVIQVFF

IDVFGVTEFFLLAIMSYDCYVAICKPLHYVTIMSSRVCKTLVLCCWMAGL

LIIFPPLTLFLNLKFCDLNVIDYFVCDAPPILKISCSDTWLIEQLVIVCA

VLTFILTLICVVLSYIYIVKTILRFSSAHQRRRAFSTCSSHMIVVSITYG

SCIFIYINPSGKQSLGSNKGVSVLVTSIAPMLNPFIYTLRNKQVRQAFSD

SFKRIAFVTKK*

>LoafORs2.161P

MTCRLDRSQESVMTNRTVTTFILLGLTDDPQLQVLCFIFLFLTYMLSVTG

NLTIITLVLLDSHLKRAMYFFLQNFSFLEISFTSACIPRYLYNIGTGDKL

ITYSACASQIFFTDLFL*QNFSFWLPCPMTAMWPFANLYTM*PS*TAQSA

EDLYFAVGRLVCL*L*L*SPHSSWT*IWNIAIICDATPLLKIS*SNTWFM

V*TVIICTVLTLIMTLMCVFLSYIYITKAILVFPSAQQKKKGFSNCSSHI

IVVSITYGSCIFIYIKPSAKNSVAINEAVTVLTTSIAPMLIPFFYTLRNK

QVKQAFNDSIKRVVIFSKK

>LoafORs2.162P

MMEKQTVTFILLGLTNDPQLKDVIFIFLFLTCMLSVTENLTIIPPCPISS

HLKTAMYFFLQNFSFLEISFTSACIPRCLYNISTGDRTITMVIIQICSTD

FFGVTEFFLLATMSYD*YITTCKPLHYMTIMNNKVYIKTHLVLLDSWLVD

HTPTT*PGPKSGIL*L*CH*PVCL*CSPSPKDLMLRNMAHRAGGQSLCCV

DLIMAPICIVLSLVYSVKTILQFPSAQQRKKPFSTCFSHLIVLSITYGSC

IFIYVKPSAKNSVAINKGVMVLTTSIAPVLNPLIYTLRNKQVKEAFTDSI

ERIVLFLKK

>LoafORs2.163

MKNYTITTFILLGLTDDPKLQIPIFIFLLLTYMLSISGNLTIISLTLVDS

HLKTTMYFFLQNFAFLEISFTSACIPRYLYNIATGDRSISYHICVIQVFF

TDVFGVTEFFLLAIMSYDRYVAICKPLHYVTIMSSRVCKTLVLCCWMAGL

LIIFPPLTLFLNLKFCDSNMIDYFVCDAPPILKISCSDTWLIEQLVIVCA

VLTFILTLICVVLSYIYIVKTILRFPSAHQRKRAFSTCSSHMIVVSITYS

SCIFIYVNPSGKQSVDSNKGVSVLITCIVPMLNPFIYTLRNKQVRQAFSD

SFKRIAFVTKT*

>LoafORs2.164P

IITIFY*LLCCYKIFFPLAIKSYVQYVPNCKPLYYLTIMNN*I*SWLILC

CWTAGLLIILLPLSLGLNLEFSDSNVTDHFVCDAAPLLKISCSEIWFIEQ

VVMVCAVFTFIMTLVCVVLSYVHFIKTILQFPSAQQRKRAFSTCSSQMVV

VSIVYGSCIFIYVKPSAKNSVAISKGV

>LoafORs2.165

MTCRLDRSQESVMTNRTVTTFILLGLTDDPQLQVLIFIFLFLTYMLSVTG

NLTIITLILLDSHLKTAMYFFLQNFSFLEISFTSACIPRYLYNIGTGDKL

ITYSACASQVFFTDLFGVTEFFLLAAMAYDRYVAICKPLHYVTIMNSTVC

RRLIFCCWVAGLFIIILPLILGLNLEFCNLNTIDHFFCDASPLLKISCSN

TWFMEQAVLICAVLTLIMTLMCVFLSYIYIIKTILGFPSAQQKKKAFSTC

SSHVIVVSITYGSCIFIYVKPSAKNSVAINKGVMVLTTSIAPVLNPFIYT

LRNKQVKQAFDDSIKRVVIFCKK*

>LoafORs2.166

MMRNNTITFILLGLTNDPQMKVVIFIFLFLTYMLSVTGNLTIIFLTFINS

HLKTAMYFFLQNFSFLEISFTSACIPRYLYNMSVGDRTITYNNCIIQIFF

TDLFGVTEFFLLAIMSYDRYVAICKPLYYVTIINNKVCRRLILYCWTAGL

LIILPPLSLGLNLEFCDSNVIDHFVCDAFPLLKISCSETWLIEQVVIVCA

VLTFITTLVCVVLSYVYIIKTILQFPSAQQRKKAFSTCSSHMIVVSITYG

SCIFIYVKPSAKNSVAINKGVMVLTTSIAPMLNPFIYTLRNKQVKQAFND

SIKRIALFLKK*

>LoafORs2.167

MKNHTITTFILLGLTDDPKLQIAIFIFLFLTYILSISGNLTIISLTLVDS

HLKTPMYFFLQKFAFLEISFTSACIPRYLYNIATGDRSITYHICVIQVFF

IDVFGVTEFFLLAIMSYDRYVAICKPLHYMTIMSSRVCKTLVFCCCMAGL

LIIFPPLTLFLNLKFCDSNLIDYFFCDASPILKISCSDTWLIEQFVIVCA

VLTFILTLICVVLSYIYIVKTILRFPSAHQRKRAFSTCSSHMIVVSITYG

SCIFMYVNPSGKQSVAINKGVSVLMTSIAPMLNPFIYTLRNKQVRQAFSD

SFKRIAFVTKK*

>LoafORs2.168P

NF*PDGIDERPQLEVVIFIFLFLAYMLSVTRNLTIISLTFVDSQLKTAMY

FFLKNLSFLEILFLSAYIPRHLCNMSTGDKIIIHVNCVVLFIII/FFPLT

TMSYDQYVANCKPLHYTTVRNNKA*T*LILCCWTAGLLIILPPLSLGLNL

EFCDSNVIDHFVCDAAPLLKIPCSENRIIEQ/LCCVDLYYDPGMCCSVLC

IHHQDHSSIPFCHQRKKALSTCFSHMTVVSITYRSCILVYVKHSAKNSVA

INKGVTVLTTSITPMLNIFIYTLRNKQ*KK

>LoafORs2.169

MTCRLDRSQESVMTNRTVTTFILLGLTDDPQLQVLIFIFLFLTYMLSVTG

NLTIITLILLDSHLKTAMYFFLQNFSFLEISFTSACIPRYLYNIGTGDKL

ITYSACASQVFFTDLFGVTEFFLLAAMAYDRYVAICKPLHYVTIMNSTVC

RRLIFCCWAAGLFIIIPPLILGLNLEFCNLNTIDHFICDASPLLKISCSN

TWFMEQTVLICAVLTFIMTLMCVFLSYIYIIKTILGFLSAQQKKKAFSTC

SSHMIVASITYGSCIFIYIKPSAKNSVAINKGVTVLTTSIAPMLNPFIYT

LRNKQVKQAFNDSMKRIVIFSKK*

>LoafORs2.170P

VMRNNTTFILLGLTNDSQLKVVIFILLFLTYMLSVTGNLTIIFLTFISSH

LKTAMYFFLQNLSFLEISFISACIPRYLYNISMDDRTITYKSCIIQIFFT

DLFGVTEFFLLATMSYDRYIAICKPLYYMTIMNNKVCRRLILYCWTAGLL

IILPPLSLGLNLEFCDSNVIDHFACDASPLLKISCSETWLIEQVVMV/CA

VLTFITTLVCVVLSYVYIIKTILQFPSAQQRKKAFSTCSSHMIVVSITYG

SWIFIYVKPLAKNSVAINKGVMVLLTSFVPMLNPFIYTLRNKQVKEAFND

SIKRIALFLSK

>LoafORs2.171

MKNHTITTFILLGLTDDPKLQIPIFIFLFLAYMLSISGNLTIISLTLVDS

HLKTPMYFFLQNFASLEISFTSACIPRYLYNIATGDRSITYHICVIQVFF

TDVFGVTEFFLLAIMSYDRYVAICKPLHYVTIMSSRVCKTLVLCCWMAGL

LIIFPPLTLFQTLTFCDSNIIDYFYCDAPPILKISCSDTWFIEQLVIVCA

VLTFILTLICVVLSYMYIIETILRFPSSQQRKRAFSTCSSHMIVVFITYG

SCIFIYVNPSAKQSVAINKGVSVLMTSIAPMLNPFIYTLRNKQVRQAFSD

SFKRITVVTKK*

>LoafORs2.172

MTIGQSQKVVMRNHTITTFILLGLTEDPQLQGLLFIFLFLTYLLSVTGNL

TIISLTLVHSHLKTPMYFFLQNFSFLEISFTSACIPRYLYNLTTGDKTIT

YCACAIQAFFTDLLGVTEFFLLAIMSYDRYEAICKPLHYTTIMNSRVCKR

LIFCCWMAALMIILPPFSLTQNLEFCDSNVIDSFLCDVSPFLKISCSDTW

IIEQMVIACAVLTFITTLLCVVLSYIYIMRTILRFPSAQQRKKAFSTCSS

HMIVVSITYGSCIFIYVKPSAKESVAINKGVIVLTTSIAPMLNPFIYTLR

NKQVKQAFSDSIKRIVLSSKE*

>LoafORs2.173P

FPTKFCLMKIKCTPACIPRYLFNIPVGDR*IICNS*VIQIVFIDVFGVT*

FFS*PSRLMTIMWPHANPSVT*LSGTTESVEGLSSSTG*LVC*SYFHLLN

TDKFRIL*LYNN*LFFYDSSPILKISCSDTWLLEQMVLACAVLVFIMTLH

CVVLSCVYIIKIILRFPSAQQRKRAFSTCSSHMILVYISYGSYIFIYVKP

SVKEPVAINKSVTMLMTVIASMLNPFVYTLRNK

>LoafORs2.174

MRNHTITTFILLGLTEDPQLQGLLFIFLFLTYFLSVTGNLTIILLTLADS

HLKTPMYFFLQNFSFLEISFTSACIPRYLYNLTTGDKTITYCACAIQGFF

ADLLGVTEFFLLAIMSYDRYVAICKPLHYTTIMNSRVCKRLIFCCWMAAL

MIILPPFSLTQNLEFCDSNVIDSFLCDVSPFLKISCSDTWVIEQMVIACA

VLTFITTLLCVILSYIYIIRTILRFPSPQQRKKAFSTCSSHMIVISITYG

SCIFIYVKPSAKESVVINKGVIVLTTSIAPMLNPFIYTLRNKQVKQAFSD

SIKRIVLSSKK*

>LoafORs2.175P

MKNNSMQTEFILLGLTDDPELQVVIFLFLYFTYILSVTGNLTIIILTLLD

SRLKTPMYFFLQNFSFLEISFTTFCIPRFLVSLVTKDETISYVRCMTQFF

FSSFWG*LNFTSWLPCFMSAM*LSVNPFIIPPS*ITQFATNLYSALG*LD

S*LSFPQ*SWRLKLEFCASNVIDHLICDASPVLQISCSDTHFLELMSFFL

AVTTLMVTLMLVIFSYGYIIKTILKFPSAQQRTKAFSTCSSHMIVVSISY

GSCIFMYIKPSANDRVTLSKGVAVLSTSVAPLLNPFVYTLRNQQVKQAFK

DMVQKVL

>LoafORs2.176P

RNHTAITAFILLGLTDDPILQIVLLIFLFLTYILSVTGNLTIITLTLSDS

HLKTPMYFFLRNFSFLEVSFTTVCVPRFLYTLATGVKTITYTACATQMFF

VVLFGATEFFLLAAMSYDRYVAICKPLHYTTIMNSKVCTTLVLCSWFAGL

LISLLPFSMGLQLEFCDSNLIDSFGCDTYPVLQISCSDTTLIEKNALGFA

VVTLIITLIGVVLSYTYIVKTILKFLSAQQRKKAFSTHSSHMIVVSMTYG

SCIFIYIKPSAKEGVALNKMVSMLATSVAPLLNPFIYTL

>LoafORs2.177P

MRNRSAVTKFILLGLRDDPQLQVFLMVFLFLTYIFTVAGNLIIILLTLVD

VHLKTPMYFFLCNFSILEIIFTIVCVPRFLYSMTLGTK/TGDKSVTYNAC

VVQLFFVIFVGAAEIFLLTVMSYDHYVAICKPLRYTTIMNDRVCTICVLG

CWLTGLLVILPLLSLGVQLDFCNSNLIDHFGCDASPLLKIVCSDTQFVEQ

VVLTMDVLTLIFTLVCVIVSYTYIIKTILGLPSAQQRKKAFSTCSSHVIV

VSLTYGSCIFIYIKPAKEGVALNKVVSLLNTSFIPLMNLFIYTL

>LoafORs2.178

MTNHTVITTFILLGMTEDPKLQLVLLVFLFLTYFLCVAGNMTIVTLTLLD

SHLQTPMYFFLRNFSFLEVSFTSVCIPRFLYSLTTGDKTCTYNACATQLF

FGILFGATEFFLFAAMSYDRYVAICKPLHYTTIMNNKFCTTLLLCCWIAG

LLIIVPPLCMGLQLEFCDSNLIDSFACDAYPILQITCSDTELIEKVVLAF

AVLTLISTLLGVLLSYTYIISTILKFPSAQQRKKAFSTCSSHMIVVSMTY

GSSIFAYIKPSGKEGVALNKVVGLLFTSVVPMLNPFIYTLRNKQVKEAFK

DTVKRIAFLIKK*

>LoafORs2.179

MTNHTVITTFILLGMTEDPKLQLVLLVFLFLTYFLCVAGNMTIVTLTLLD

SHLQTPMYFFLRNFSFLEVSFTSVCIPRFLYSLTTGDKTCTYNACATQLF

FGILFGATEFFLFAAMSYDRYVAICKPLHYTTIMNNKFCTTLLLCCWGAG

LLIIVPPLGMGLRLEFCDSNLIDSFGCDAYPILQITCSDTELIEKVVLAF

AVLTLITTLLGVLLSYTYIISTILKFPSAQQRKKAFSTCSSHMIVVSMSY

GSSIFAYIKPSGKEGIALNKVVGLLFTSVVPMLNPFIYTLRNKQVKEAFK

DTVKRIAFLIKK*

>LoafORs2.180P

MTNHTVITTFVLLGMTEDPKLQIVLLVFLFLTYFLCVAGNMTIITLTLLH

SHLQTPMYFFLRNFSFLEVSFTSICIPGFLYSLTTGDKTCTYNACATRLF

FGILFGATEFFLFAAMSYDRYVAICKPLHYTTIMNNKFCTTLLLCCWGAG

LLIIVPP/LLSPPGMGLQLEFCDSNLVDSFACDAYPILQITCSDTELIEK

VVLAFTVLTLISTLLGVLLSYTYIISTILKFPSAQQRKKAFSTCSSHMIV

VSMSYGSSIFAYIKPSRNEGVALNKLVGLLFTSVVPMLNPFIYTLRNKQV

KEAFKDTVKRIAFLIKK

>LoafORs2.181

MMRNHSAITAFTMLGFTNDSQLQILIFIYLFITYMLSVLGNLIIISLILV

DSHLKTAMYFFLQNFSLLEILMTTACVPRYLHILLTGDRAITVKACFSQL

FFVILFAATEFFLLVVMSYDRYVAICKPLYYMIITHDRICRILILCCWVF

GLLIILPPLGLSLHLEFCDSVIDHFYCDASPILKNSCSDTWFIEQLVIVG

AVLTFVMNLVCIVLSYILIIKTILRLPSAQQRNKAFSTCFSHIIVVSMTY

GSCIFIYIKPSAKDEVAINKIISLFPTSVAPLLNPFIYTLRNKQVKQSFN

DILKRLAFLSKK*

>LoafORs2.182

MKNQTSLTEFVLLGFTDNPELQAMDFIFLFLTYIFSVMGNLTIITLTLLD

SHLQNPMYFFLWNFSFLEISFTTIFIPRFLSSILTGNNTISFAGCFTQYF

FAIFLGATEFYLLAAMSYDRYVAICKPLHYTTIMNRRACTQLVLCSWLSA

FLIILSPIILTSQLDFCASNVLNHFYCDNGPLMEISCSDTSLLELVDFIL

AFGTLVVTLVLVMLSYTYIIKTILKIPSAQQRKKAFSTCSSHVIVISISC

GSCFFIYIKPSAKEGITFNKGVAVLITSVVPLLNPFIYTLRNQEVKKAFK

GMVRKIVSLYCHIEFIP*

>LoafORs2.183P

FAFLFITYLLSTIGNMAIVSLTLLDFHLQTPMYFFLRNFSFLEISFTNII

PRVLISITTGNRSISFAGCFTQYFFAIFLGAKEFYLLAATSYDRYVAICR

PLHYTTIMNSRICTQLVLCSWLAGLMIIIPPITLMSQQDFSASNRLNHYF

CDFEPLRELSCSDTSLVEKVVFLVESVTLVLTLVLVILSYAFIIRTILKL

PSA*QRTKAFSTCSSHMIVISLSYGSCFFIYVKPSAKERDTFNKGVALLI

TSVAPLLNPFIYILRNQQVKQAFKDAIKKLVNL

>LoafORs2.184

MMRNHSAITAFTMLGFTNDPQLQILIFIYLSITYMLSVLGNLIIISLILV

DSHLKTAMYFFLQNFSLLEILMTTACVPRYLHILSTGDRAITIKACFSQL

FFVVLFAATEFFLLVVMSYDRYVAICKPLYYMIIMHDRVCRILILSCWVF

ALLIILPPLGLSLCLEFCDSIIDHFYCDASPILRNSCSDTWFIEQLVIVG

AVLILIMNLVCIVLSYILIIKTILRLPSAQQKNKAFCTCFSHIIVVSMTY

GSCMFIYIKPLAKEGVAINKIVSLLPTSVAPLLNPFIYTLRNKQVKQSFN

DILKRLEFLSK*

>LoafORs2.185

MKNQTSLTEFVLLGFTDNPELQAMVFIFLFLTYIFSVMGNLTIITLTLLD

SHLQTPMYFFLRNFSFLEISFTTIFIPRFLSSILTGNNTISFAGCFTQYF

FAIFLGATEFYLLAAMSYDRYVAICKPLHYTTIMNRRACTQLVLCSWLSG

FLIILSPIILTSQLDFCASNVLNHFYCDYGPLMEISCSDTSLLELIDFIL

AIVTLVVTLVLVMLSYTYIIKTVLKIPSAQQRKKAFSTCSSHVIVISISY

GSCIFIYIKPSAKEGVAFNKAVAVLITSVAPLLNPFIYTLQNQQVKKAFK

DTVRKIVSL*

>LoafORs2.186P

MKNKTMVMEFILLGLTDVPELQVALFAFLLIAYLLSIIGNLTILILTLLD

LHLQTPMYFFLWNFSFLEIFFTNNIIPRVLISITTGNKSISFAGCFGQYF

FVIFLGATEFYLLAAMSYDRYVAICKPLHYMTTMNSRVCAQLVLCSWLAG

LMIIRPPITLMSQQDFCASNSLNHYFCDFEPLRELSCSDTSLVEKVVFLV

ASVTLVLTLGLVIPSYAFIISTILKFPSAQQRTKAFSTRSSHMIVISLSY

GSCFFIYVKPSTKEGDIFTR

>LoafORs2.187P

VYLIHILSVLGNLIIISLILVDSHLKTAMYFFLQNFSLLEVLMTTVCIPR

YLHILSTRDRTITVKACFSQVLFVVLFATTEFFLLAIMSYDCYVAICKTL

HYMIMMHNKICRILVLCCWVLALFIIFPPLGLSLHLEFCDSVIDHFYCDA

SPILKNACSDTWFVEQLVIVSAVLTFIMNLVCIVLTYVFIIRAILRLPSA

HQGKKAFCTCSSHMIVVSMTYGSCIFIYIQPSAKEAVAINKVVSLLPTSV

APLLNSFIYTLRNKQVKQSFNDILKRLAFLSKK

>LoafORs2.188

MGRACNSVKSAMRNHSAITTFTILGLTNDPQLQILIFIYVFITYMLSVIG

NLTIIYLILVDSHLKTAMYFFLQNFSFIEITFTTACVPQYLHIISSGDRT

ITVKACFTQIFFIVLFAATEFFLLAVMSYDRYVAICKPLQYVTIMNNRVC

RILILCCWVSGLLIILPFLNLSLHLEFCDSVIDHFYCDASPILKNSCSDT

WFIEQVVIVCALVTFIMTLVCVVLSYMYIIRMTLQFPSAQQRKKAFSTCS

SHMIVVSVTYGSYIFIYINPSAKDEVAINKAVSLLATSVAPLLNPFIYTL

RNKQVKQSFNDILRRFAFLSKKE*

>LoafORs2.189

MKNQTTFTEFILLGLTNQPELQVVIFIFLFLTYMLSVIGNLTIIALTLLD

PHLQMPMYFFLRNFSFLEISFTSIFIPRFLTSMATGNKVISFAGCLTQYF

FAIFLGPTEFYLLASMSYDRYVAICKPLHYLTIMSSRICIQLVFCSWLGG

FLTILPPIILMSHVDFCVTNILNHYYCDYGPLMELACSDTNVLELMVILL

AVVTLVVTLVLVTLSYTYIIRTILRIPSAQQRTKTFSTCSSHMIVISLSY

GSCMFMYINPSAKEVGSFNKGIAVLITSVTPLLNPFVYTLRNQQVKQAFK

DTVKKIVKV*

>LoafORs2.190

MRNRSAITTFIILGLTDDPQLQILVFIFLFITYMLSIIGNLTIIFLILVD

SHLKTAMYLFLQNFSFLEISFTTACVPPYLHIISTGNRTITIKACFTQIY

FIVLFAATEFFLLAVMSYDRYVAICKPLYYVTIVNSRVCRILILCCWVSG

LLIILPPLGLSLHLEFCDFVIDHFICDPLPLLKNSCSDTRFIEQLVRVCA

VLTFIMTLMCVVLSYIYIIKTILRLPSVQQRKKAFSTCSSHMIVVSISYG

SCIFMYIKPLSKDEVAINKAVSLLNTSVAPLLNPFIYTLRNKQVKQSFKD

ILKKSAFFSKK*

>LoafORs2.191

MRNHSAITTFTVLGLTNDPQLQILIFIYLFITYMLSIIGNLTIIYLILVD

SHLKTAMYFFLQNFSFIEITFTTACVPQYLHIISSGDRTITVKACFTQIF

FIVLFGATEFFLLAIMSYDRYVAIYEPLQYVTIMNNRVCRILILCCWVSG

LLIILPFLNLSLHLEFCDSVIDHFYCDASPLLKNSCSDTWFIEQVVIVCA

VVTFIMTLVCVVLSYIFIIKTILRLPSAQQRKKAFSTCSSHMIVVSISYG

SCIFIYIKPSAKHEVAINKAVSLLATSVAPLLNPFIYTLRNKQVKQSFND

ILKRFAFLSKKE*

>LoafORs2.192P

MKNQTTFTEFILLGLTFQPELQVVIFIFLLLAYMLSVLGNLAIIILTVID

PHLKTPMYFFLRNFTYLEVSFTTIFIPRLLTSLTTGNKVISFTGCLTQYF

FAIFLGATEFYLLTSMSYDRYVAVCKPLHYLTIMNSQVCI*LVFCSWMAG

VLTVLSPIILISQLDFCASNVLNQYYCDYRPLVEIACSDTSLLQLIVILL

AVLTLVVTLVVTLVLVILSYTHIIRTILRIPSAQQRTKAFSTCSSHMIVI

SLSYGSCIFLYIGPSAKKGGNFDKEVSLLMTSVSPLLNPFIYTLRNQQVK

QAFKNTVKKIVKF

>LoafORs2.193

MKNRTKFTEFILLGLTNQPELRVVIFIFLLLAYMLSVLGNLTIIILTLVD

PYLKTPMYFFLQNFSYLEISFTSTVIPRLLTSLTTGNKVISFAGCLTQYF

FAILLGATEFYLLASMSYDRYVAICKPLHYLTIMNSQVCIQLVFCSWMGG

VLAVLPPAILISQMDFCASNVLNHYYCDYRPLVEIACSDTSLLQLIVILL

AVLTLVVTLVLVILSYTHIIRTILRIPSAQQRTKAFSTCSSHMIVISLSY

GSCIFLYIDPSPKKGGNFDKEVSLLMTSVSPLLNPFIYTLRNQQVKQAFK

NTVKKIVKF*

>LoafORs2.194

MKNYTAITTFILVGLTDDTNLQILLFIFLFLTYLLSVVGNLTIITLTLVD

SHLKTPMYFFLRNFSILEVSFTTVCIPRFLYTMASGDNTVTYNACATQLF

FVVVLGVTEFFLLTAMSYDRYVAICKPLHYTTIMSNRVCIRFLIGCYIIA

LIIVIPPFGMGFELEFCDSNVIDHFACDVAPILKITCSNTEFIERFVLIL

AVLILLFTLVCVIMSYAYIIKTILRFPSAQQQKKAFSTCSSHIIVVSITY

GSCIFIYVKPSAKEGVAINKVVSVLTTSVAPVMNPFIYTLRNKQVAQAFK

DLIKKVASISKN*

>LoafORs2.195P

ITTFMFLGLTDDPKLQVLLFIFLFLTYMLSVTGNLIIIAFTLSDSHLKTP

MYFFLRNFSFLEVSFTSVCIPRFLYAMTTGDNTVTYNACATQMLFVVLFG

VTEFFLLAAMSYDHYVAICKPLHYTTIMNNTVCTTLILSCWVAGLLIILP

PLGIGLQLEFCDSSVIDHFACDTSPILQITC*DTVFMDRIVLSFGVLTLI

ITLVCVVLSYTYIIKTILKFPSAQQRKKAFSTCSSHIIVISITYGSCMFI

CIKPSAKEGVAISKVVSVLTTSVAPLLNPFIYTLRNKQVKQAFKDIIKRI

TFLTKK

>LoafORs2.196

MRNRSAITKFILLGLTDDPQLQVFLTVFLFLTYIFTVAGNLIIILLTLVD

VHLKTPTYFFLRNFSILEIIFTTVCVPRFLYSMTTGDKSVTYNACVVQLF

FVILVGAAEFFLLTAMSYDRYVAICKPLHYTTIMNDRVCTIFVLGCWLTG

LLVILPPLSLGVQLDFCNSNLIDHFGCDASPLLKIVCSDTQFVEHIVLTM

AVLTLIFTLVCVIVSYTYIIKTILRLPSTQQRKKAFSTCSSHVIVVSLTY

GSCIFIYIKPAKEGVALNKVVSLLNTSFIPLMNLFIYTL*

>LoafORs2.197P

MTNHTVITTFILLGMTEDPKLQILLLVFLFLTYLLCVAGNMAIITLTLLD

SHLQTPMYFFLRNFSFLGVSFTSVCIPRFLYSLTTGDKTCTYNACATQLF

FVILFGATEFFLFAAM

>LoafORs2.198P

MTNHTVITTFILLGMTEDPKLQILLLVFLFLTYFLCVAGNMTIITLTLLD

SHLQTPMYFFLRNFSFLEVSFTSVCIPRFLYSLTTGDKTCTYHACFTQLF

FGILFGATEFFLLAAMSYDRYVAICKPLHYTTIMNNKFCTTLLLCCWIAG

LLIIVPPLGMGLQLEFCDSNLIDSFVCDAYPILQITCSDTELIEKVVLAF

AVLTLITTLLGVLLSYTYIISTILKFPST*QRIKAFSTCSSHMIVVSMSY

GSSIFAYIKPSGKEGVALNKVVALLFTSVAPMLNPFIYTLRNKQVKEAFK

DTVKRIAFLIKK

>LoafORs2.199

MRNHTAITTFILLGLTDDPILQIVLLIFFFLTYILSVTGNLTIITLTLSD

SHLKTPMYFFLRNFSFLEVSFTTVCVPRFLYTLTTGDKTITYNACATQMF

FVVLFGVTEFFLLAAMSYDRYVAICKPLHYTTIMNSKVCTTLLLCSWFAG

LLISLLPFSMGLQLEFCDSNLIDSFGCDTYPVLQISCSDTMLIEKNALGF

AVVTLIITLIGVVLSYTYIVKTILKFLSAQQRKKAFSTCSSHMIVVSMTY

GSFIFIYIKPSAKEGVALNKMVSMLATSVAPLLNPFIYTL*

>LoafORs2.200

MTNHTVITTFILLGMTEDPKLQIVLLVFLFLTYFLCVAGNMAIITLTLLD

SHLQTPMYFFLRNFSFLEVSFTSVCTPRFLYSLTTGDKTCTYNACFTQLF

FGVLFGATEFFLLAAMAYDRYVAICKPLHYTTILNNKFCTTLLLCCWIAG

LLIIVPPLCMGLRLEFCDSNLIDSFACDAYPILQITCSNTELIEKVVLAF

AVLTLITTLLGVLLSYTYIISTILKFPSAQQRKKAFSTCSSHMIVVSMSY

GSSIFAYIKPSGKEGIALNKVVGLLLTSVAPMLNPFIYTLRNKQVKEAFK

DTVKRIAFLMNK*

>LoafORs2.201

MTNHTVITTFILLGMTEDPKLQIVLSVFLFLTYFLCVAGNMTIITLTLLD

SHLQTPMYFFLRNFSFLEVSFTSVCIPRFLYSLTTGDKKCTYNACATQLF

FGVFLGATEFFLFAAMSYDRYVAICKPLHYTTIMNNKFCTTLLLCCWGAG

LLIIVPPLGMGLRLEFCDSNLIDSFGCDAYPILQITCSDTELIEKVVLAF

AVLTLISTLLGVLLSYTYIIRTILKFPSAQQRKKAFSTCSSHMIVVSMTY

GSSIFAYIKPSGKEGVALNKVVGLLFTSVVPMLNPFIYTLRNKQVKEAFK

DTVKRIAFLIKK*

>LoafORs2.202

MTNHTVITTFILLGMTEDPKLQIVLLVFLFLTYFFCVAGNMAVISLTLLD

SHLQTPMYFFLRNFSFLEVSFTSVCIPRFLYSLTTGDKTCTYNACFTHLF

FVILLGATEFFLFSAMSYDRYVAICKPLHYTTIMNNKFCTTLLLCCWGAG

LLIIALPLGMGLQLEFCDSNLIDSFACDAYPILQITCSDTELIEKVVLAF

AVLTLITTLLGVILSYTYIISTILKFPSAQQRKKAFSTCSSHMIVVSMSY

GSSIFSYIKPSRNEGVTLNKVVGLLFTSVVPLLNPFIYTLRNKQVKEAFK

DTVKRVAFLIKK*

>LoafORs2.203P

MRNHTAITTFILLGLTDDPILHIVLLIFLFLTYILSVTGNLTIITLTLSD

SHLKTPMYFFLRNFSFLEVLFTTVCVPRFLYTLATGDKTITYNACATQKF

F/CHTEVFFVLFGATNFFLLAAMSYDRYVAICKPLHYTTIMNSKVCTTLV

LCSWFAGLLISLLPFSMGLQLEFCDSNLIDSFGCDTYPVLQISCSDTTLT

EKNALGFAVVTLIITLIGVVLSYTYIVKTILKFPSAQQRKKAFSTCSSHM

IVVSMTYGSCI

>LoafORs2.204P

MKNRTMIEFILLGLTDNPELQTVIFILLFLAYIFSILGNPTIITLILLDT

HLRTPMYFFLRNFSFLEISFTTTFTPRLLISISTGNKAISFAGCFT*YFF

AMFLGITEFYLLAAMSYDC*VAICKPLHYTTIMNNRVCI*LVLCSWLGGF

LIILYPIIQTSQLDFCASNVLNHY/LSCSDTRLLELVDFILAVVTLVVTL

VLVLLSYTNIIKTILKIPSAQHRKKAFSTCSSHMTVISLSW/SLSHGSCI

FMYIKPSAKEGVAVNKGVAVLSTSVAPLLNPFIYTLRNKQVKQALKDVAR

KIMHL

>LoafORs2.205P

DSYVVLPLEFFLLGNFLYNHFHS*ALIGISTGNEAISFAGCFTQYFFPIF

PGATEFYLLPAMSYDRYVAICKPLHYASIMNNRVYIQVLCFWLGGFLIIL

YPIIQTSQLDFCAFNVLNHYCCDYAPLID

>LoafORs2.206P

MKNQTSLTEFVLLGFTDNPELQAMVFIFLFLTYISSVMGNVTIITLTLLD

SHPQAPMYFFLQNFSFLEISFTTIFIPRFLSSILTGNNTINFAGYITT*F

FDEFLEAIKLYFMAAMSYDLYVATCKPLPYTTFMNSRVCTQLVLCPWLSG

FLIILSSIILTSQLDCCASNCAKSF/VLNHFYCDYGPLMEISCSDTSLLE

LIDFILAIVTLVVTLVLVMLSYTYIIKTILKIPSAQQRKKAFSTWSSHVI

VISIAYGSCIFIYIKPSAKEGVAFNITSIVPILNPFI*TLRNQVKIAFKN

IVRKVASL

>LoafORs2.207P

IFLGATEFFLLAAISYDG*VTICKPLPYTTVMNRACIQLVLHSWVSGFLI

ILYPIIQTSQLDFCASKVLDHCDYEPLIEIPCSDTRFLELVDFILAVVTL

AVTPVLVILTYTNIIKTILKIFSAQKRKKAFSTCCSYMIVITL

>LoafORs2.208

MKNQTFLKEFVLLGLTDIPELQTVIFILLFLTYIFSILGNLTIITLTLLD

SHLQTPMYFFLQNFSFLEISFTTIFTPRLLISISTGNKAISFAGCFTQYF

FAIFLGATEFYLLAAMSYDRYVAICKPLHYTTIMNNRACIQLVLCSWLGG

FLIILYPIIQTSQLDFCASNVLNHYYCDYGPLIEISCSDTRLLELVDFIL

AVVTLAVTLVLVLLSYMNIIKTILKIPSAQQRKKAFSTCSSHMIIISLSY

GSCIFMYIKPSAKEGVAFNKGVAVLNTSVAPLLNPFIYTLRNKQVKQAFR

DVTRKIMSLK*

>LoafORs2.209

MKNQTMTEFILLGLTDIPELQTVIFILLFLTYIFSILGNLTIITLTLLDS

HLQTPMYFFLRNFSFLEISFTTIFTPRLLISISTGNKAISFAGCFTQYFF

AIFLGATEFFLLAAMSYDRYVAICKPLHYTTIMNNRACIQLVLCSWLGGF

LIILYPIIQTSQLDFCASNVLNHYCCDYGPLIEISCSDTRLLELVDFILA

VVTLAVTLVLVLLSYTNIIKTILKIPSAEQRKKAFSTCSSHMIVISLSYG

SCIFMYIKPSAKEGVAVNKGVAVLNTSVAPLLNPFIYTLRNKQVKQALKD

VARKIMQLYLL*

>LoafORs2.210P

FLALLLTYLLNASRNVTLISLILLDTCLQTPMYFFL*NLSCLEI*FQTVI

VPKMLLNIATGTKTIIFTSCIAPDFFHIFLGATEFFLSMIMPYDWHTAIC

KPLYYPILMSSRVCTQLFLTCWLAEFCFIIVPVILTSQLPFCEAHINHFF

CDHMLLMEVVYSGPNMLEMVDFTLVLKALLSTIVLINLSYAQIIWTIVRI

PCPQERKKSFSTCSSHIIVATMCYGSCFFMYVKPYPGKRVDLNKEVSLIN

TIINPLLNLFIYTSGTNQLSR

>LoafORs2.211

MGCGNGTVVTEFVLLGFSSFESLQVPLFYGVLCIYLVTLLGNVLIILLTL

ADPALHLPMYFFLRHFSMVEILYTTTTVPRMLVDLLSSCPTIPPASCFTQ

LYFFALFGIAECCLLTVMAYDRYAAICRPLHYTTLMNRGACVSMVGASYL

MGIITGTAHSICIFTLPFHGTNTVHHFLCDILPVLRLASASTFWGEVGNL

AVTIAFIVTPFLLIMASYACILTTIFGVATSQGRQKIFSTCSSHLFVVLL

FFGTGTVAYMRPWADASQDTDQILGFFYTVVTPMFNPFVYTLRNKEVTGA

MRRLVKRHLWGP*

>LoafORs2.212P

ALGNHSIIP*FIFLGLSADFNIEALLFVLFQVIYLLTMMGNLMILLVTRT

DSHLHTLMFFFLSKPMYFFLSHLSIIDLCFSSVTVPKMLENLLS*KKIVS

VRDCLA*IFFVLKGLKPVC

>LoafORs4.1P

NTIKYYLKNKEISSFFFFPYRFTSTTTLQVLGHLLTGHKTISWASCFAQM

DFYFILGTTETLLLAVTSVDLHQAIGHPLRYLPLLMA*ACLAPELVC*GN

EQPPLPQGTQHLDVLVPFLWPQCPPLLLLQQYPLLELVCAGTRLLQLASF

LVASCTLDGCCGGDCLVLRPHHLHCPPPALLWGHWKSSSTCFSHIVVVSL

SYGSCIIIQL

>LoafORs4.2P

LRYGVIKTPSGCRHPWASAAGALGFSVVHAQRRGCIASALLPLGSPQ*TT

FFCELPAVLRTACADTTANQMLVYGLGTPILLVPLAFILVSYALILGQVG

KLPSAKSRLKALTTCSSHLTVVGLFYGTVTAMYLGRRGSRALPTKHHKLV

AVFYLVVTPVLNPLIYSLRNREVHAAARYALARLSGLRIVL

>LoafORs4.3T

FCDVSPLLNLSCTHVALTELVDFISAIVILWGSLLVAMASYAAIGRAVLH

MPSATARRKAFSTCASHLVVVGIFYSATIFIYARPSRIEAMDLNKVLSVI

YTVVTPMCNPIIYCLRNKEVQGAFRRTLHRS*

>LoafORs4.4

MERSLELANMTRVQEFILLGLSTRLGVMDALFAIFLALYVLTLLENTLII

YLICYHSELHKPMYFFLGNLSCLEMCYMSVTMPSLLLGLWTGPCHVPFTA

CTIQLFLFISLIGTKCTLLASMAYDRYVAICRPLHYPLLMRPQVCLGLAM

TSWLGGLLISLIKTTCIMSLSYCGPNVLNHFFCDVSPLLNLSCTHMALTE

LVDFVSAIIIFCGSLVVALSSYVAIGRAVLRMTSAAAHCKALSTCASHLV

VMGIFYSVVLFMYSRPSYIESTDLNKVLSVIYTAITPICSPIIYCLRNKE

VHIALKKTLRPH*

>LoafORs4.5

MERSLELANMTRVQEFILLGLSPRVNIRDALFAVFLTLYLLTLLENTLII

YLVYSHSELHKPMYFFLGNLSCLEMCYVSVTMPSLLVGLWIGSYHISFTV

CMTQLFFFVSLICIECTLLASMAYDHYVAICHPLHYPLLMRPQVCLGLSL

SSWLGGLMVSGVKTTCIASLSYCGPNVLNQFFCDVSPLLNLSCTHVALTE

LVDFISAIVIFCGTLLVALASYSAIGLAVLHMASAAARRKAFSTCASHLV

VVGIFYSAALFIYCRPSRIKSMDLNKVLSVTYTVVTPMCNPIIYCLRNKE

VHAVLRKTLHLPRC*

>LoafORs4.6

MNQSWTHEFVLLGFAHVPLLRPLLITLFLTMFLLTLLGNGLIVMLSMWDP

ALRTPMYFFLRQLALVELCFSLDIVPRLLATLLWPGCGMSPVDCALQLLL

VLACVTSECFLLTIMAWDRYVAICRPLHYGAIMSPQLCHLLATTCWLAGV

PVSLVFTIWLFSFPFCGPRGIHHFFCDIAPLLSLVCADTRVFETNVLVAT

VLVIMVPFCLIAASYIAVLVTVLRVPSATGRHKALSTCASHFIVVVLFYG

TTGIIHLRPKASYSPESKQVVSLSYTVVTPMLNPLIYSLRNKEVKAALGR

VCSG*

>LoafORs4.7

MERSLDLANVTRVQEFILLGLSTRPDLRNALFAVFLTLYLLTLLENTLII

YLICSHSELHRPMYFFLGNLSCLEMCYVSVTMPSLLVGLWTGPYRISFTA

CMTQLFFFIVLICTECTLLASMAYDRYLAICHPLHYPLLMRPQVCLGLAL

SSWLGGVLVSVAKTTCIASLSYCGPNVLNQFFCDVSPLLNLSCTHVALTE

LVNFISAIVIFCGTLLVALASYSDIGVAVLLMPSAAACRKAFSTCASHLV

VVGIFYSAALFIYCRPSRIKSMDLNKVLSVTYTVVTPMCNPIIYCLRNKE

VHAVLRKTLHLPRC*

>LoafORs4.8

MDANQSWACEFILLGFAHVPTLRPLLAALVLAVFLLSLLGNGLIVLLTMW

DAALHAPMYFFLRQLALVELCFSLDIVPRMLATLLWPGHGMSPVGCALQM

LLVLACVTSECFLLTIMAGDRYLAICKPLHYGTIMSPQLCHLLGASCWLA

GVPVSLVFTIWLFSFPFCGPCGIHHFFCDISPLLSLVCADTRVFETNVLM

ATVIVMMVPFCLIAASYIGVLVTVLRMPSFTGRHKALSTCASHLIVVVLF

YGTTGVIHLRPRANYSPESKQVVSVSYTVVAPMLNPLIYSLRNKEVKAAL

GRVCFG*

>LoafORs4.9

MTNLTAVSVFILQGFSAIPELQLLSTAAFLLIYIAAVLGNISIVAAVTLD

ASLHTPMYFFLKNLSLVDICSISTTLPRAMMAATVGSGEISLPACASQLF

AFVCFGSVECFLITSMAYDRCLAIYRPLLYRAAMSPQTCVSLVVVAWGSG

LVYSTFHTANTFSLPFCGPNVIDHFFCDIPPVMHLVCASADAHEATGFAV

SGCVIMSCFTLTILSYVRILATVVQIRSAAGRGKAFSTCSSHLATVLLFY

GTGSCAYMQPTTHYSLLQGRLAAVFYSVLTPSLNPLIYSLRNKDMKKALQ

KLYLQVPL*

>LoafORs4.10

MTNLTAVSVFILQGFSAIPELQLLSTAAFLLIYIAAVLGNISIVAAVTLD

ASLHTPMYFFLKNLSLVDICSISTTLPRAMMAATVGSGEISLPACASQLF

AFVCFGSVECFLITSMAYDRCLAIYRPLLYRAAMSPQTCVSLVVVACSSG

LVYSAFHTANTFSLPFCGPNVIDHFFCDIPPVMHLACASTDAHEATGFAV

SGCVIMSCFTLTILSYICILATVVQIRSAAGRGKAFSTCSSHLATVLLFY

GTGSSAYMQPTTHYSPLQGRLAAVFYSVLTPSLNPLIYSLRNKDMKKALQ

KLYLQVPL*

>LoafORs5.1P

MDQNNYTSLHGFILLGFPDHLKLEMVLSGVVTIFYLITLVGNTAIIVTSL

LDSHLHTPMYFFLRNLSFPDLFY/ICFTTSIIPQMLVNLWGPDKTISYVG

CVI*LYVNMCLGSAECLLLAVMSYHRFTAICKPLHYLVIMKPQLCLKMII

MVWGISLACSAILCTLTLNLPRCGNNLLDHFLCELPAMVKIACTDTTTVE

MSVFALGIVIVLTPLLLILISYGYVAQAVLRMKSKAGQRKAINTCGSHLT

AVSIFYVTVIYMHLQPGNSASKDQGKFLTLFYVIVTPSLNPLIYTLRNKD

MKDALKKLVRVACQSTKMKRKWIS

>LoafORs6.1

MDAANKSSEGAPFILLGLMTSPGQRWPLFVLFLVLYVAGILGNGLIVAAI

LASPALHAPMYFLLAHLSFADLCFTSVTVPKMLANLLAHDRSISLAGCLT

QMYFFFALGVTDSCLLAAMAFDRYVAIRHSLHYATRMSRTTCTALVGTAW

VISHVHSLLHILLMARLSFCASHQVPHFFCDHQPLLRLSCSDTRHIQLLI

FTEGAAVVVTPFLLILTSYGAIAAAIIQLPSASGRLRAVSTCGSHLVLVG

LFYGTVIAVYFQPTSRYEAQRGRVATVMYTIVTPMLNPVIYSLRNRDVQG

ALRSLLPKQRILASDF*

>LoafORs6.2P

FILLGITDRWDLRITLFLIFLTVYLVSLLGNMGMVLLICVDARLHMPMYF

FLANLSLLDACYSSAIGPKMLVDLLLPRATIPYAACALQMFVFAGLADAE

CCLLAAMAYDRYVAIRNPLLYTTAMSRHLCLALLGASGLGGAVSAFVHTT

FTFRLSFCHSREINSFFCNIPPLLAISCNDTSLNELLLFAICGFIQMATI

LAIAVSYGFIAGAVIRMHSAEGRRRAASTCGSHLTAVAMLYGTHFYV

>LoafORs6.3P

KPNQSSISDFLLLGFSEQPEKQPLLFGLFLGMYLVTILGNLLIILAISFD

THLHTLMYFFLANLSFVDTCFTCTTVPKVLVNIQTQHHTISYTGCLVQMH

FFMALTLQDDFLLAMTASDRYVAICLPLHYTTIMQP*CCLLLIATSWLCS

QLLTFSFTLLMAQFSFCASHSIPHFFCDLLPLFKLACSDTRIFQAMMFIE

AALSGVVPLTCVLVSYAHIIHTILRVSSAGGKHKVFSTCGSHLTVVTLFY

GTLFLVYFQPSSSYSADTGMLASVIYTMVTPMLNPFIYSLRNRDMRDALW

ELLG

>LoafORs6.4P

NRTSISDFFLLSFSKQLKHQSLLFGLFLGMYLITMLGNLLNIFAISSDPH

LHTPMYFFLANLSFIDTCFTCTIVPKVLVNIQTQHYTISYTGCLMQMYFF

MAFALLDDFLLTVMAYDCYVAICLPLHYTTIMGPKHCLLLMAASWLCSHC

LAFSLILLMSQFSFCASHSISHFFCDLPLLKLACSNTHIFQVMMFIETAL

SGVVPLTCVLTSYVHIIHTIFKVPSAGGKQKVFSTCGSHLTVVTLFYGTV

FLVYFQPSSSYSPNTGIVASVIYTIVTPMLNPFIYSLRNKDMKRALWRLL

GCGKCST

>LoafORs6.5P

QLLLFSLFLGMYLVTVLGNLLIILAISSDTHLHTPMYFFLANLSFIETCF

TCTIVPKVLVNIQTQHYAISYTGCLIQMYFFMVFTLLDDFLLAVMAYDRY

VAICLPLHYTMVMRPQHCLLLVTASWLCSQLLAFSLTLLMSQFSFCASHC

IRHFFCDVPPLLKLVCSDTHTYQNTMLTEAVLSGMIPLTCVLVSYVHIIH

TIVSIPSSVGKHKVFSTCGSHLSVLSLFYGTLFLVYFQPSSSYSADTGMV

ASVIYTVVIPMLNPFIYSLRNREMKGAVWRL

>LoafORs6.6

MLRENQSHITEFFLLGLTTDPNQQMWLFASFLATYLINVVGNSIIIAAIL

GDAHLHTPMYFFLSNLSLVDICFTTVIVPQMLVNMLTQRRTILFAQCLTQ

MYFFVAFGITDSFLLAAMAIDRYVAICNPLHYTSTMSPRRCLLLVMASWV

VSHLHSLTHTILMARLSFCGSNIIHHFFCDVQPLLTLSCSDTSVKELLAF

TEGSLVIMSPFIFIIVSYVYITRAVLRVPSGGGRYKVFSTCGSHLMIVAL

FYGTIISVYIRPSSTYSVTKDRVVTVIYTIVTPTLNPFIYSFRNKDMKQA

LRKLTRRAE*

>LoafORs6.7

MPRGNQSHITEFLLMGLTTDPIQQIWLFSSFLAMYLVNVVGNSVIIAAIR

RDAHLHTPMYFFLSNLSFMDICFTNVIVPRMLANMLSKSKKVPFAQCLTQ

MYFFVACAITDSFLLAAMAVDRYVAICNPLHYTTAMSPRRCLLLVMVSWV

VSHLHSLTHTILMARLSFCGSNIIQHFFCDVQPLLMLSCSDTSVNELLAF

TEGSLVIMSPFIFIIVSYVYITRAVLKVPSGGGRYKVFSTCGSHLTVVAL

YYGTAISVYIRPSSTYSVTKDRVVTVIYTVVIPMLNPFIYSLRNRDMKQA

LRKLTRITE*

>LoafORs6.8

MEIKNYSSSTSGFILLGLSSNPQLQKPLFAIFFTMYLVTMMGNMLIILAI

RSDSRLHTPMYFFLSNLSFMDICFTMVIVPKMLVNLQSETKTISYLGCLV

QMYFFMAFGNTDSYLLASMAIDRLVAICNPFHYDVVMNPRRCLLMLLGSC

TISYLHALLRVLLISRLSFCASHVIKHFFCDTQPVLKLSCSDTSSSQIVV

MTETLAVIVTPFLCVLFSYIRIIITVLRIPSAAGRWKAFSTCGSHLTVVA

LFYGSIIYVYFRPLSMYSVVKDRVATVTYTVVTPMLNPFIYSLRNKDMKR

GLGKLRDRIHS*

>LoafORs6.9

MEIKNYSSSTSGFIFLGLSSNPQLEKPLFAIFLTMYLVTTVGNVLIILAI

HSDSRLQTPMYFFLSNLSFMDICFTMVIVPKMLVNLQSETKTISYVGCLV

QMYFFMAFGNTDSYLLASMAIDRLVAISNPFHYDVVMNPQRCVLMLLGSC

TISHLHSLFWVLFLSHLSFCASHVIQHFFCDIQPVLKLSCTDTSSSQIVV

MTETLAVVATPFLCILLSYMQIIITVLRIPSTAGKWKAFSTCGSHLTVVA

LFYGSVIYVYFRPLSMYSAVKDRVVTVMYTVVTPMLNPFIYSLRNKDMKR

GMGKLRDRIHS*

>LoafORs6.10P

MEIKNYSSSTSGFILLGLSSNPQLQKPLFAIFLIMYLVTMVGNVFIILAI

HSDSRLHNPMYVFLRNLSFMDICFTTVIVPKMLVNLLSQTKTISYVGCLV

QI*FLMAFGNTDSYLLASMAIDRLVAICNPFHYDVVMNPQRCLLMLLGSC

TISHLYSLLWALLMSRLSFCTSHVIKHFFCDTQPVLKLSCSDTFSSQIVV

MTETLAVIVTPFLCILFSYTWIITAVLRIPSTARKWKAFSTCGSHLTVVA

LFYGSVIYVYFRPLSMYSVVKDRVATVMYTVVTPMLNPFIYSLRNKDMKR

GLRKLRERIH

>LoafORs6.11

MEIKNYSSSTSGFILLGLSSNPQLQKPLFAIFFTMYLVTMVGNVLIILAI

HSDSRLHTPMYFFLSNLSFMDICFTTVIVPKMLVNLLSEEKTISYVGCLI

QMYFSMAFGNTDSYLLASMAIDRLVAICNPFRYDVVMSPQRCLLMLLGSC

TISHLHSLLRVLLMSRLSFCASHVIKHFFCDTQPVLKLSCSDTSSSQIVV

MTETLAVIVTPFLCILFSYIRIIIAVLRIPSATGKWKAFSTCGSHLTVVA

LFYGSVIYVYFRPLSMYSVVKDRVATVTYTVVTPMLNPFIYSLRNKDMKR

GLGKLRDRIHS*

>LoafORs6.12

MEVQNYSSSTSGFILLGLSSNPQLQKPLFAIFLTMYLVTVVGNVLIILPI

HFDSRLHTPMYFFLSNLSFMDICFITVIVPKMLVNLLSQTKIISYVGCLV

QMYLFIAFVNTDSYLLASMAIDRLVAICDPFHYDVVMNPWRCLLMLLGSC

TISHLHALLRVLLMSHLSFCASHVIQHFFCDTQPVLKLSCSDTSSSQIVV

MTETLAVIVTPFLCILFSYMRIIITVLRIPSASGKWKAFSTCGSHLTVVA

LFYGSVIYVYFRPLSMYSAVKDRVATVTYTVVTPMLNPFIYSLRNKDMKR

GLGKLRDRIHS*

>LoafORs6.13

MGMFNLTRLSEFILLGLSSQPEDQKPLFALFFIIYLVTLMGNLLIILAIR

SDPKLQNPMYFFLSILSFADICYTTVIVPKMLMNFLSETKTIAYAECLTQ

MYFFLVFGNMDSYLLAVMAIDRYVAICNPFHYVTVMSHRRCVLLLSFSIA

FSCLHSLLHVLLVNRLTFCASNVIHHFFCDVSPVLKLSCSSTSISELAAM

TEGLASVMAPFVCIIISYLQILIAVLKMPSAAGKHKAFSTCSSHLTVVTL

FYGTIIYVYFQPLSSYTVNDRIATIIYTVSTSMLNPFIYSLRNKDMKRGL

EKLISRIKSQTDKLSSTESNKIPGP*

>LoafORs6.14

MGWNNLTRPSEFILLGISSRPEDQKPLFVFFLTVYLITVMGNLIVILAIH

SDTRLQTPMYFLLSILSFVDLCYTTVTIPKMLISFLSETKTIPYGECLTQ

MYFFLSFGNVDSYLLGAMAIDRYVAISNPFHYITIMSHKRCILLLVISFC

IPLLHSLLHVCLISQLLFCDSNVIHHFLCDVNPVLKLSCSSTFVNEIVIK

TEGLSVTLTPFSCIIFSYLRILITVLKIPSAAGKHKAFSTCGSHLTVVTL

FYGSISYVYFQPLFNYTVQDRIATLIYTILTPMLNPFIYSLRNKDMKQGL

AKLMDRVKSI*

>LoafORs6.15P

Y*MTKTLSFIDIYFTNFILPMLMANTLSKSKKVPFAQCITQMYFFVA*AV

PDSFLQAAMAIAHYVATYNPLHYTKTMNPRCCLLLVMALQVVSQLHSVTH

TILIAHCSFCGSNTIHDFFCNVQPLLMLSCSDTSVNELFGLHRGLL/LAF

TEGSFVIMSLFIFIIMSCI*ITHAVLRVTSGGSRYKVFSTCRSHLMLVVL

HYTTTILVYIHPSSTYSVTKDHEAT

>LoafORs6.16P

MVKKNHSSSTSGFILLGLSSNPQLQKPLFAVFLTR*LVTMVRKVLIILAI

HSDSRLHTPMYFFLSNLSFMDICFITVIVPKMLVSLLSQTKIISYMGSLV

QIYFFTAFVNTDSYLLTSMAIDQLVTICKPFHYDVVMNPWHCLLMLLDSC

TISHLHALLCVLLISHLSFCASHIIKHFFCDTQPVLKLSALTLSPAR

>LoafORs6.17

MGKPGRENQTTVSDFLLLGLSEQPEQQLLLFGIFLGMYLVTMVGNLLIIL

AISSDLHLHTPMYFFLANLSLADACFSSTSIPKMLANIYSQSQTISYSGC

LTQLYFLITFGGLDNCLLAVMAYDRYVAICQPLHYSTAMSPKLCALMLGM

CWLLTNCPALTHTLLLTRLAFCAQKAIPHFYCDPSALLKLACSNTHINEL

MIITMGLMFLTAPLLLIVLSYVRISWAVCSISSPGGQWKAFSTCGSHLTV

VLLFYVSLMGVYLLPPSTHSTERASRAAILYNVIIPMLNPFIYSLRNKDM

KAALRKLFGSGKTFFLP*

>LoafORs6.18P

MLRVNQGHITEFLPLGFSTDPKHQTWLFASFLAMYLINMFGNSVIITAIR

GDAHLHTPMYFFLSNLSFMDVCFKNVILPVMLANTLRARGCPLPTVSPRC

ISL*PEQSLTASSRLLWPLLTMWPPITHCITPRP*APDAASCW*WHHGWC

HTSTQ*PTQFSWPASPSVGPISSTISSVTSSHC*CSPALTPLSMNFSAFT

EGSFVITSPFIVIIASYVYITSAVLRVPFGEGRYKVFSTCRSHLMVVEVY

YTTTILVYIHPSSTYSVTKD

>LoafORs6.19P

MEIKNYSSSTSGFILLGLSSNPQLQKSLFAIFLTMYLATMVGNVLIILGI

HSDARLHTPMYFFLGNLSFIDICFITVIVPKMLVNLLSETKIISYMVCLV

QMYFFISFVNTHSYLLASMALDRLVAICNPFHYDVVMNPQRCVLVLLGSC

TISHLHSLFCVLLLSHLSFCASHIIQHFF/SSQTVVMTETLAVILTPFLC

NLFSYMQIIITVLRIPSTARK*KVFSTCGSHLTIVALFYGSNIYVYFRPP

SLYSAVMG*VATVMYTVVTPRLKHFISSLRSKDMKRG*GKLRNRIHS

>LoafORs6.20

MGKPGRENQTTVSDFLLLGLSEQLEQQLLLFGIFLGMYLVTVVGNLLIIL

AISSDPHLHIPMYFFLANLSLTDACFSSTSIPKMLANIYSQSQTISYSGC

LTQLYFLITFGSLDNCLLAVMAYDRYVAICQPLHYSTAMNPKLCALMLGM

CWLLTNCPALTHTLLLTRLAFCAQKAIPHFYCDPSALLKLACSNTHINEL

MIITMGLMFLTAPLLLIVLSYVRISWAVCSISSPGGRWKAFSTCGSHLTV

VLLFYGSLMGVYLLPPSTHSTERASRAAILYMVIIPMLNPFIYSLRNKDM

KEALRKLFGSGKTSLLP*

>LoafORs6.21

MGMFNLTRLSEFILLGLSSRPEDQKPLFALFFIIYLVTLMGNLLIIMAIR

SDPKLQNPMYFFLSILSFADICYTTVIVPKMLMNFLSETKTIAYAECLTQ

MYFFLVFGNMDSYLLAVMAIDRYVAICNPFHYATVMSHRRCVLLLSFSIV

FSCLHSLLHVLLVNRLIFCASNVIHHFFCDVSPVLKLSCSSTSINELVAM

TEGLASVMAPFVCITTSYLQILIAVLKMPSAAGKRKAFSTCSSHLTVVTL

FYGSISYVYLQPLSSYTVKDRIATIIYTVLTSMLNPFIYSLRNKDMKRGL

EKLINRMKSQMDKLSSTEPSEIRGP*

>LoafORs6.22P

MCSAPNVSHSPVFLILGLSRARVPHSLLFLLLLFT*LP**GT*LWCCLST

WTSGSSYLCTIYLVASLCWTWGCPQSPCLSYCPVQSLITQAFLLPAAWSN

VFFYAFGITDTLIISVMAQNCYVAICDPLHCHLVMNQQFCAH*VAFSWVV

SMLYTMLHVGLFLPLCWVLDDGEMLTSLTSSVTMEHFFKPLAR

>LoafORs6.23T

LPNHSC*PLLGQFFFFYAFGVTDTLVIAVMALDRYVAICDPLHYTLVMNR

QLCACLLTFSWVVSTLHTMLHVGLLLPLRWVGDNWDNVNLPHFFCDHRPL

LRASCSDTHSNELAIFLEGGFLMLGPCSLIVLSYVHIGATILRLPSAAGR

RRAVSTCGSHLTMVGFLYGTIIWVYFQPPSQESQDQDMVAAVMYTTITPL

ANPFVYSLRNKDVKSALRRLLGRGRVDS*

>LoafORs6.24

MAMINRTEVTEFILSGLSNWPEMQPVIFGIVLAMYLVAVVGNALVVIAAH

LDTKLQTPMYFLLSQLSFVDIFLTTITVPQMLVHTLSVDRTISFNRCMVQ

LFFFMTVGSMEGHLLAAMAYDRYVAIYNPLRYSTIVSRHLCLRITLTSWV

VVNLNSLLYSMLVSRLTFCGNQVTHFFCDITPLLQLSCTRPVVNEMLIFT

EGVAVVVSPFFFILGSYAHIGVAIARMHSVAALRKALSTCSSHILVVLLL

YGSVIRMYLRPSSGYDLDQDHYVAIFYTVVTPMLNPLIYSLRNQEVKGAL

WRLGKKLCISGNFQPGSQANRKWQQIS*

>LoafORs6.25

MEKTNWTSVSHFVLLGISTFPEEQTPLFLLFLLMYAINISGNSAIITLII

SVPHLHTPMYLFLSNLALADICFTSTTVPKMLQNIFSATKAISYMGCLAQ

TYFFICFAAMENFLLAVMAYDRYIAICHPFHYPLILTRMLCAQMVAVCHV

LSHLHALLHTLLMGQLIFCEDNRIPHFFCDLYPLMKISCSSTHLNTLMIH

TEGVIVINGALAFIIVSYACIISAVLRIPSANGKWKAFSTCGSHLTVVAI

FYGTLTWVYFRPLSSYSVAKVRIVTVMYTVVTPMLNPFIYSLRNGDVKEA

FRKCVSRIWNKPQKAVISFP*

>LoafORs6.26

MDRRNQTSVYEFLLLGLSEHQEQQPLLFGLFLGMYLVTVVGNLVIILVIG

FDMHLHTPMYLFLANLSISDIGFISTIIPEMLDNICSGSKLISYGGCLTQ

LYFFGLFADLDNFLLAVMALDRYVAISHPLHYAMIMNSQRCVLLVAGSWV

VITFHALVHACLVTRLSFCGPNIIPHFFCDLVPVLKLACSRTYVNDLVLI

LVAGTLLIGPFVCILTSYFYIVLAILRIDSPKGKQRAFSICTSHLSVVSL

FYTTAIGVYLYPPTPYSGGKERVFSIMYTTVTPMLNPFIYSLRNRDMKGA

LGKLLRIKTF*

>LoafORs6.27

MDKNNQSSVSEFLLFGLSEKSNHQPLLFGIFLAMYLVTVMGNLLIILAIG

FDPQLHTPMYFFLSNLSFADACFSTTTVPKMLVNIQTHSQTILYGGCLAQ

MHFFMTFGALDDFLLGVMAYDRYVAICSPLHYSTVMSSLVCLLLLALCWV

LTTLAALLHTLLMVRLSFCADNTIHHFFCDVVPLLQLSCSETSTNQMTLF

LVGSMILTGPLSLIILSYAHIISTILRVPSASGRQKAFSTCGSHLTVVFL

FYGTAIVVYLCPTSSHSGGKDRIAAVFYTVVTPMLNPFIYSLRNKDMKRA

LSRLSGLNTLSSLTLRPGYIQEGPHAQEVVALPSTSYE*

>LoafORs6.28

MDRSNQSSVSEFLLLGLSEKLDQQPLLFGIFLAMYLVTVVGNMLIILAIR

FDLHLHTPMYFFLSNLSFADACFSTTTVPKMLVNIQTHSQTIPYGECLAQ

MHFFMTFGALDDFLLGVMAYDRFVAICRPLHYPTVMSPLVCVLLLAACWI

FTNLAALLHTLLMARLSFCASNTIHHFFCDILPLLQLSCSETSTNQIALF

LVCSMILTGPLSLIILSYARIITTILRVPSASGRQKAFSTCGSHLTVVFL

FYGTAIGVYLYPPSSHLGEKEKVAAVFYTVVTPMLNPFVYSLRNSDMKTA

LRGLFGINTLSSQGL*

>LoafORs6.29

MKPENHTSVSEFLLLGLSEQQKQQPFLFGIFLGMYLVTVVGNLLIIPAIS

SDPHLHTPMYFFLANFSFTDLCLSSTTVPRMLVSIQAHKNTIPYAGCLSQ

VYFFLWFIGLDVFLLAVMAYDRLVAICHPLHYTLVTSPRRCILLVAMSLI

LAQLYSLTHTILLTQLSFCAGNVIPHFFCELLPLLKLSCSNTYANQCVLM

YWGGALTILIPLLIITSYIRIVAAIVRVPSASGKWKAFSTCGSHLSAVCL

FYMSAIGVYFIPSIADSAGKDRIAVVMYAVVTPMLNPFIYSLRNQDMKGA

LERLLSRRVLQSP*

>LoafORs6.30

MGKPGRVNQTTVSDFLLLGLSEQPEQQLLLFGIFLGMYLVTVVGNLIIIL

AISSDPHLHTPMYFFLANLSLADACFSSTSIPKMLANIYTQSQAISYSGC

LTQLYFLITFGGLDNCLLAVMAYDRYVAICQPLHYSTAMSPKLCALMLGM

CWLLTNCPALTHTLLMTCLAFCAQKAIPHFYCDPSALLKLACSDTGINEL

MIITMGLMFLTAPLLLIVLSYVRISWAVFSISSPGGRWKAFSTCGSHLTV

VLLFFVSVMGVYLLPPSTHSTESESRAAILYNVVIPMLNPFIYSLRNKDM

KAALRKLFGSGKTSLLP*

>LoafORs6.31P

PRVLLFGQLSFVDMGLTTSTVMKMLVNVQTQHHTISYTGCLTQMYFFLMF

GDLDSFFLAVMAYDRYVAICHPLCYSTVMSPRTCVLLLLLCWVLTTIVAL

THTLFMTQLSFCAIGEISHFFCDITPVLKLSCSDIQINELMVFALGGTVL

IVPFICIVIFYIYIVSAVLKIQTPGGGGSKAFSTCSSHLYVVCVFYGTLF

SAYLCPSSVVSEEKDVVAAAVYTVVTPMLNPFIYSLRNKVMKGALKRLLS

RRRIFFS

>LoafORs6.32

MRWENQSSTSEFLLLGFPIQLEQQGMFFTLFLVMYLTTVLGNLLIILLIR

VDPRLHTPMYFFLSHLAFTDISFSSVTVPKMLINMQTRNQSIPYSGCIAQ

MYFFILFTDLDNFLLTSMAYDRYVAICHPLHYTTIMRDWLCTLLVAVSWI

LSCASALSHTIPLAHLSFCADKTIPHFFCDLAALLKLSCSDTFLNEMIIF

TAGVAVIALPLMCILASYGRIGATILKAPSTKGVCKAFSTCGSQLSVVYL

YYGTIIGLYFFPSSSNSNDNDIIASVMYTVVTPLLNPFIYSLRNRDMKGA

LQRLFNWMKVSS*

>LoafORs6.33

MSTMRWENQSSMSEFLLLGLPIQLEQQNMFFTLFLVMYLTTMLGNMLIIL

LIRVDPCLHTPMYFFLSHLAFTDFSLSSVTVPKMLMNMHSEDLFISYAGC

ITQMYFFIFFIDLDNFLLTTMAYDRYVAICHPLHYTTIMREGLCTLLVAV

SWILSCASALSHTIPLAHLSFCDDNTIPHFFCDLAALLKLSCSDIFLNEM

IIFTVGVAVITLPLICILISYGHIGTTILKVPSTKGICKALSTCGSHLTV

VSLYYGTIIGLYLFPSSNNSNVNNIIASVMYIVVTPLLNPFIYSLRNRDM

KGALQRLFNRVIVSS*

>LoafORs6.34

MRRENQSSVSEFLLLGFPFWREQQGMFFALFLVIYLTTVLGNLLIIVLIR

GDSRLHTPMYFFLSHLALTDTTFSSVTVPKMLMNMQTQHLSISYEGCISQ

TYFFILLADLDSFLITSMAYDRYVAICHPLHYITIMSQSLCVMLVAGSWV

TACACALLHTLLLAWLSFCADDTIPHFFCDLAALLKLSCSDTSINQLVIF

TAGLTAIILPFLCTLVSYGHIGVTILQVPSTNGICKALSTCGSHLSVVTL

YYGAIFGLYFLPSSGNTIDKNIIGSMLYTVITPMLNPFIYSLRNKEMKGA

LRKLFSKKIYSSN*

>LoafORs6.35

MREDNQSSVSEFLLLGLPIQLEQQGTFFALFLGIYLTTVLGNLLIILLIR

LDSHLHTPMYFFLSHLAFTDVSFSSVIAPKMLMNMQTQSQSISYMGCISQ

VYFFLFFGDIDSLLLTSMAYDRYVAICHPLRYTTIMSQSLCFMLVILSWA

HSFAYALLHTLLLAHLSFCGDNTLPHFFCDLSALLKLSTSDTSTNELVIL

TLGVVVITSPLICILVSYGRIVSTILRVHLTKGIGKALSTCGSHLSVVSL

YYGAIIGLYFFPSSSDSNDKNVIVAVLYTLVTPMLNPFIYSLRSRDMRGA

LGNILSRRTFLSQ*

>LoafORs6.36

MKRDNQSRVSEFLLLGLPIQPEQQGMFFALFLGMYLTTVLGNLLIILLIR

LDSRLHTPMYFFLSHLAITDIFFSSVTAPKVLMNMQTQSQSISYAGCISQ

VYFSILFADIDSFLLTSMAYDRYVAICHSLHYTTIMSQSLCFLLVIVSWV

LSFASALLHTLLLAHLSFCGDNILPHFFCDISALLKLSSSDTTTNELVIL

TVGGMVIILPFICILVSYGHIGSTILRIPSTKGICKALSTCGSHLSVVSL

YYGAIIGLYIFPSSSDSNGKDVIVAVLYTLVTPMLNPFIYSLRNRDMKGA

MGNILSRGKFSL*

>LoafORs6.37

MKRDNQSSVSEFLLLGLPIRPEQQGMFFVLFLVMYLTTMLGNLFIVLLIR

LDSCLHTPMYFFLSHLALTDISFSSVTAPKMLLNMQTQSQSISYAGCISQ

VYFSIFFFDIDSFLLTSMAYDRYVAICHPLHYTTIMSRSLCFMLVFVSWV

LSFASALLHTLLLARLYFCGDNILLHFFCDLSTLLKLSSSDTTTNELVIL

TVGTVFITLPFICILVSYGHIGSTILRVPSTKGICKALSTCGSHLSVVSL

YYGAIIGLYIFPSSSDSNGKDVIVAVFYTLVTPMLNPVIYSLRNQAMKGA

LGKILSREKFSP*

>LoafORs6.38P

MRRDNQSNVSEFLLLGLPIWPEHQGVYYALFLGMYLITVLGNLLIILLIR

LDSRLHTSMYFFLSHLAFTDVSFSSVTAPKMLMNMQTQRQSISYAGCIS*

VYFFLFFGDIDSFLLTSMAYDRYVAICHPLHYTTIMSQSLCFLLVIVSWV

LSFASALLHTLLLVHLSFCGDNIVPHFFCDLSALLKLSSSDTSTNELVIL

TVGVLVITLPFLCILVSYGHIGATILRVPSTKGVCKALSTCGSHLSVVSL

YYGAIIGLYFFP

>LoafORs6.39

MKRDNQSSLSEFLLLGLPICPEQQGIYYALFLGIYLTTVLENLFIILLIR

LDSRLHTPMYFFLSHLALTDISFSSVTAPKMLMNMQMQNQSISYAGCISQ

VYFFLFFGGIDSFLLTSMAYDRYVAICYPLHYTTIMSRSLCFLLVIMSWV

LSFASALLHTLLLACLSFCGDNTIPHFFCDLSALLKLSSSDTSTNKLAIL

IVGVMVITLPFICILVSYGCIGSTILRVPSTKGICKALSTCGSHLSVVSL

YYGAIIGLYFFPSFRNSNDKDVIVAILYTVVTPMLNPFIYSLRNRDMKGA

LGNILKRRTFSPYCALNLDRCCDLFCLIRC*

>LoafORs6.40

MRRDNQSSLSEFLLLGLPIRPDQQDIYYALFLGMYLTTVLGNLLIILLIR

LDSCLQTPKYFFLSHLAFNDISFSSVTAPKMLMNMQMQNQSISYAGCISQ

VYFFLFFAAIDSFLLTSMAYDRYVAICHPLHYTTIMNRSLCFLLVILSWV

LSFASALLHTLLLARLSFCGGNTLPHFFCDLSALLKLSSSDTSTNEQVIL

AVGVVVINLPFICILISYGCIGSTILRVPSTMGISKALSTCGSHLSVVSL

YYGAIIGLYFFPSSSNSNDKDIIVAVLYSLVTPMLNPFIYSLRNRDMRGA

LGNVLNRRTFSP*

>LoafORs6.41

MRRDNQSSLSEFLLLGLPIRPEQQEMFFSVFLGMYLTTVLGNLLIILLIR

LDSRLHTPMYFFLSHLALTDISSSSVIAPKMLMNMKTRSQSMSYTGCISQ

VYFYIFFFDIDSFLLTSMAYDRYVAICHPLHYTAIMSQSLCFLLVTVSWV

LSFANALLHTLLLAHLSFCGDNTLPHFFCDLPTLLNLSSSDTSTNELVIL

TVGGVVIILPFVCILVSYGHIGATILKVPSTKGICKALSTCGSHLSVVSL

YYGAIIGLYASPSSSDSNSKDVIVAIFYTLGTPMLNPFIYSLRNRDMKGA

LGNILSKGKFSP*

>LoafORs6.42P

MRRDNQSSASEFLLLGLPIRLEQ*GIYYALSLGMYLTKVLGNLLIILLIR

VDSCLQTPMYFFLSHLVFTDIWFS*VIAPKMLMNMQTQSQSISYAGAFLR

CIFFLFFAAIGSFLLTSM

>LoafORs6.43P

GMYLTMVLGNLLIILLIRLDSRLHSPMYFFLSHLALSNISFSSVTAPKML

MNTQTQNQSISYAGCIFQGCFFIFFADIDSFLLTAMAYDRYLSICHPFHY

TTIMSQS/LVIVS*VLSFTTVLSRNLLLACFSFCRDNTFPHFRDLSALLK

LSSSNTSTNELIILTERVMIIMLPLICILLSCGHIGTTILRVPSTKEIFK

AWSTCGSHLSVVSV*QGTIIGLYFLPSSSNSNNKDVIVAVLYTLVTPMLN

TFIYSLRSQDMKGALGNILNRRTFSP*SALNLGRSFDWFC

>LoafORs6.44P

MKRDNQSSVPEFLLLGLPIWLEQ*DMFFSLFLGMYLTTVLGNLLIILLIK

LDSSLHTPMYFFLSHLALADISFSSVTAPKMLMNMQTQNQSISYTGCISQ

VYFFIFFADIDSFLLTSMAYDRYMAVCHPLHYTAIMSQSLCFLLVIVSCV

LSFANALVHTLLLVHLSFCGDNSLPHFFCDLSTLLKLSSSDTSTNELVIL

AVGG/GGVVIILPFICILVSYSYIGATILQVPLTKGICKALSTCGFHFSV

VSLYYGAIIGLYVSPSSSDSNSKDVIVAVFYTLVTPMLNPFIYSLRNRDM

KGTLGNILSK

>LoafORs6.45P

TFPHFYCDLSVLLKLSSSDTSTNELFTLAFICILVSYGCSESPLK*ENLQ

SLVHVCLPTLRGVSILWGN*WIVVFPLIQ*LQ*QRLIVSVLYTLVTSILN

PFIYSLRNQDMKGTLGNILNRRTFSP*RALN*GTF*DLFC

>LoafORs6.46

MRRDNQSSLSEFLLLGLPIRPEQQDMFFALFLGMYLTTVLGNLLIILLIR

LDSRLHTPMYFFLSHLALTDISFSSVIAPKMLMNMQTQNQSISYAGCISQ

VYFYIFFADIDSFLLTSMAYDRYMAVCHPLHYTTIMSQSLCFWLVIVSWV

LSFGNALLHTLLLAHLSFCGDNTLPHFFCDLPTLLKLSSSDTSTNELFIL

TVGVVVITLPFICILVSYGHIGATILRVTSTKGICKALSTCGSHLSVVSL

YYGAIIGLCVSPSSSDSNSKDVIVGVFYTLGTPMLNPFIYSLRNQDMKRA

LGNILSKGKFSP*

>LoafORs6.47P

SEFFLLGIPIRLEGLGMHLTTVLGNLFIILLIRLDSRLHTPMYFFLTTGP

SLTSLSQHQRC**THKHRVNPSHILGAFFRCTFFGDIDSFLLTSMAYDRY

MAVCHPFHYTTIMSQSLCCLLVIVS*ILSFTTVLLHTLLLAHLSFCRDNT

VPHFCDLSALLKLSSSDTSTNEPIILTERVVILMLPFICILLSYATL/IA

TTNLKVPSTKGIFKALSTCGSHL*VASVY*GRIIGLYFLPSSSNSNDKDA

IVAVLYTLVTPMLNPFFYSLRNQDMKGALGNILNRRTFSP*SALNLGGCF

DWIC

>LoafORs6.48

MRRDNQSSMSEFLLLGLPLWMEQHDMFFPLFLGMYLTTVLGNLLIILLIK

LDSSLHTPMYFFLSHLAFTDISFSSVTAPKMLMNMQTQNQSISYAGCISQ

VYFFIFFADIDSFLLTSMAYDRYMAICHPLHYSIIMRQSLCFLLVIVSWV

LSFANALVHTLLLAHLSFCGDNTLPHFFCDLSTLLKLSSSDTSTNELVIL

TVGGVVITLPFICILVSYGHIGATILRVPSTKGICKALSTCGSHLSVVSL

YYGAIIGLYVSPSSSDSNSKDVIVAVFYTLVTPMLNPFIYSLRNRDMKGA

LGNILSKVFTIMYSVD*

>LoafORs6.49P

TFSHFFRDLSVLLKLSSSDTSTNELFTLAFICILVSYGCSVSTILRVPSN

KGIFKALSTYGFQLYVVSLYFGAINGL*FFPLSSNFNDKDVIVSVLYTLV

TSILNPFIYSLRNQDMKGTLGNILNRRTFSP*CALN*GTF*DLFC

>LoafORs6.50

MRRDNQSSLSEFLLLGLPIRPEQQDMFFALFLGMYLTTVLGNLLIILLIR

LDSHLHTPMYFFLSHLAFTDISFSSVIAPKMLMNMRTQSRSISYAGCISQ

VYFYIFFADTDSFLLTSMAYDRYMAICHPLHYTTIMSQSLCFLLVIVSCV

LSFANALLHTLLLAHLSFCGDNTLPHFFCDLPTVLKLSSSDTSTNELFIL

TVGGVVITLPFICILVSYGHIGATILRVASTKGICKALSTCGSHLSVVSL

YYGAIIGLYVSPSSSDSNSKDVIVAVFYTLGTPMLNPFIYSLRNQDMKRA

LGNILSKGKFSP*

>LoafORs6.51P

SEFFFLGIPIRLEGLGMCLTTALGNLFIILLIRLDSRLQTPMYFFLTTGP

SLTSLSQHQRC**THKHRVNPSHMLGAFFRCTFFGDIDSFLLTSMAYGRY

MAICHTFHFFSHYTTIMSQSLCCLLVIVS*ILSFTTVLLHTLLLAHLSFC

RDNTVPHFCDLSALLKLSSSDTSTNEPIILTERVVILMLLFICILLSYAT

L/IATTNLKVPSTKGIFKALSTCGSHL*VASVY*GRIIGLYFLPSSSNSN

DKDAIVAVLYTLVTPMLNPFFYSLRNQDMKGALGNILNRRTFSP*SALNL

GRCFDWFC

>LoafORs6.52P

MRRDNQSSVSEFLLLGLPIWLEKQDMFFPLFLGMYLTTVLGNLLIILLIK

LGSHLHTCMYFFLSHLALTDISFSSVTAPKMLMNMQTQSQSISYAGCISQ

VYFFIFFADIDNFLLTSMAYDRYMAICHLLH*TIIMSQNL/CFLLVSLFW

VLSFANALLLAHLSFCGHNTLPHFFCDLSTLLKLFSSDTSTNELVILTIG

GVVIIIPFVCILVS*SYIGATILRVPLTKGICKALSTCGFHLSVVSLYYG

AIVRLYVSPSSSDSNSKDIIVAVFYTLVTPMLNPFIYSLRNWDMKGALGN

IFSR

>LoafORs6.53

MRWENQSSVSKFLLLGLPIQLDQQAMFFALFLSMYLTTILGNLLIILLIR

LDSRLHTPMYFFLSHLALTDISFSSVTVPKMLMNMQTQHLFISYPDCISQ

MYFYMLFGGVDNFLLGEMAYDRYAAICHPLHYTSIMKKEFCVLLIAGSWI

LSCGSALLHTLLLAQLSFCADNTIPHFFCSLSILLKLSCSNTSLNELVIL

TAGAGVIILPLSGILLSYGRIVASILRVPSTKGICKALSTCGSHLSVVSL

FYGTIVALYFSPSSNNSNEKDMIFSLMYTVVTPMLNPFIYSLRNRDMKLA

LGILFRNVILFFK*

>LoafORs6.54P

MRWENQSSVSKFLLLGLPSRPEQQAMFFALFLRMYLTTILGNLLIILLIR

LGSCLHTPMYFFFSAT*PSLMSPFHLSPSQRC**ICRLIFITYPACISQM

YFYMLFGGVDNFLFAVMAYDRYVVICHLLHYTTIMRKELCVLLVAGA*TL

STGSALLHTLLLAQLSFCADNTISPLFLSSS

>LoafORs6.55

MRSKNQSNVSEFLLLGLPIPREQQAMFFALFLGMYLTTVFGNLLVILLIR

LDSRLHTPMYFFLSHLSLSDISLSSITVPKMLMNLKTHHRSIPYVECMSQ

AYCFILFGCTDSLLLAVMAYDRYVAICHPLHYTTVMKGELCIFLVSGCWL

LSCVHGLLHTLLLSRLSFCTETIISHFFCDLVAVLKSSCSDTSLNELVIF

IEGGLFFIVPLSGILGSYIRTAVIIMRVLSVKRISKALSTCGSHLFVVSL

YYGTVASVYFFSSSDESKDKDIIASVIYMVVIPMLNPFIYSLRNKDIKCA

FDGFVRAKELSSCH*

>LoafORs6.56P

LPFFFFFIPSREKSGMRPENQNIRSKFLLLGLSIRLE*QTMFSTLFQGMY

LSMVLGNRFIILLIRLDSCLHIPIHFFLSHLAFSDVSFSSVTVPKMSIDM

QASDKSIPYVECTLQMYFWILFICLDNLLPVVMAYDRFVAACHPLHYPTI

MREEQCTLLVVEFWFFSCIHALLHILLLSCLSFCADNTIP/PHFCDLTAL

FKLICSDTSLNDLVILTVGGVLVLLPLNAISGSYVSIGATILKAPSTKWI

CEDLSTYGSHLFMVFLYYGTLAIIYFFPSSNNSKIKDIIVSVTCIVVTSM

IYSLRNRDMKLALGMLYRGGV

>LoafORs6.57P

MTMERANQTSSVSEFILLGLSSRPEDQKPLFVLFLTMYLVTITGNLLIIL

AIHSDPQLQTPMYFFLSFLSFTDICFTTTIVPKMLVNFLSLKKTISYAGC

LTQMYFFYVFGNTDSCLLAAMAIDRYVAICDPFHCVTIMSHHRCYLLLAF

SCSFPHLHSLLHTLLLNLLTFCDSNVIQHFLCDINPLLKLSCSSTFVN/I

TIKTEGVIVFVTPFLCISFSYVRILIAVLKIPSAVGKRKALSTCSSHFAV

VTLFYGSIYYVYLQPLSSYTVRDRVATIGYTILSSMLNPFIYSLRNKDMK

RGLGKLMSRRK

>LoafORs6.58P

VSEFLLLGLPIRLKEQCI*FSLFLGVYLTMELGNLLIILFIWLDS*LCTP

IYFFLSHLIFTDISFPIVTAPKMLMNMQTQSQPVSYAGCISQVYFFLFFG

D/NCVLGLILCQCSTAHLLLAHLSFCGDILPHFFCDLSALLKLSNSDTSI

NELVILTVGVEVVTLPFKHILVSYGLIGSTILKVPSTKGICKDLSNCGSH

PSVVSLYYGAIIGLYIFHSSSNS

>LoafORs6.59

MRSENQSSMSEFCLLGLPIRPEQQGMFFILFLSMYLTTVLGNLLIILLIR

LDSRLHTPMYFFLSHLALTDVSFSSVTVPKMLMNMHTQDQSIPYAGCVTQ

MYFFILFGCIDNLLLAAMAYDRYVAICHPLHYTTIMREELCIFLLAGSWL

LSCASALSHTLLLARLSFCADSTIPHFFCDLAALLKLSCSDTSLNEMVIF

GVGGFVIILSFIGVLVSYGHIGATILRFPSIKGICKALSTCGSHFSVVFL

FYGTIVVLYFFPSSSNSTDKDIIASVMYTVVTPMLNPFIYSLRNRDMKGA

MGKLVRREIFLSK*

>LoafORs6.60

MRLQNQSSVSEFLLLGLPIRLEQQAMFFALFLGMYLTTVLGNLLIILLIR

LDSRLHTPMYFFLSHLALTDVSFSSVTVPKMLMNMHTQDQSIPYAGCVTQ

MYFFIFFGCIDNLLLGVMAYDRYVAICHPLHYTAIMRENLCFSLVAGSWL

FSCSSAMSHTLSLARLSFCGDNTIPHFFCDLAALLKLSCSDTSINALVIF

TVGALGIIIPLTGILVSYVRIGVSILRVPSAKGICKALSTCGSHLSVVFL

FYGTIMVLYIFPSSNNSNDKDITASVMYTVVTPMLNPFIYSLRNRDMKGA

LGRLFRGEIFFSK*

>LoafORs6.61

MQWENESSVSEFLLLGLPIQQEQQAVFFALFLGMYLTTVLGNLLIILLIR

LDSRLHTPMYFFLSHLALIDISFSSVTVPKMLMSMQTQHLSISYPECISQ

MYFYILFACIDNLLLGVMAYDRYVAICHPLHYTTIMRKEFCVLLVTGSWI

LSCGSALLHTLLLTQLSFCADNTIPHFFCSLPILLKLSCSNTSLNELVIF

TAGAVVVIFPLSGILLSYGRIGASILRVPSTKGICKALSTCGSHLSVVSL

FYGTIVALYFSPSLSNSNEKDMIASLMYTVVTPMLNPFIYSLRNRDMKLA

MGILFRNDIPFSK*

>LoafORs6.62

MRPENQSSVSEFLLLGLPIQPEQQAMFFALFLSMYLTTVLGNLLIILLIR

VDPRLHTPMYFFLSHLALSDISLSSVTVPKMLMNLKTHHQSISYVGCISQ

MYFFIVFSCADNLLLAVMAYDRYVAICHPLHYTTIVRGELCIFLVVGCWF

FSCVHGLLHSLLMGQLSFCAVTIIPHFSCDLTAVLKSSCSDTSLNELVIF

TEGGLFFIVPLSGILASYICMAVTILRVLSIKRISKALSTCGSHLFVVSL

YYGTLAGIYFFSSSGQSKDKDTIASVMYMVVTPMLNPFIYSLRNKDIKCA

FDGFARAKNFS*

>LoafORs6.63

MSPENQSSVPEFLLLGLPIGVEQQAMFFALFLSMYLTTVLGNLLIILLIR

LDSRFHTPMYFFLSHLAFSDVSFSSVTVPKLLINMHTLDQSISYVGCISQ

MYFFILFVCLDNFLLAVMAYDRFVAICHPLHYTTIMREELCVLLVVGSWF

FSCVHALLHTLLLFHLSFCADNTIPHFFCDLTVLLKLTCSDISLNELVIV

TEGGVLALLALSVILGSYVSIGATILKVPSTKRICKALSTCGSHLFVVLL

YYGTLAIIYFFPSSNNSKIKDIIASAMYSVVTPMLNPFIYSLRNRDMKLA

LRMLYRGGIIFAK*

>LoafORs6.64P

FFLFLTLYLITVAGNLFIILAIHTDHHL*TPMYFSLSVLSFTDIWFTTAI

VPKMLVNFLSTKKTISYTGCLTQMYFLYAFGNTDSCLLAAMVIDRHIAIC

NPFHYVTIMSHHHCFLLLAFCCSFPHLHSLLHTLLLNLLTFCDSNVIQNF

LCDINPLLKLSSSSIFVNDITIKTEGVVVLVTPFLCISFSYVRILIAVLK

IPSAAGKRKAFSTCGSHFTVVTIVYGSVFYVYLQPLSSYTIRDRLAIIGY

TILSSMLNLFIYSLRNKDMKRGLGKLMCRRKP

>LoafORs6.65

MERVNQTTSVSEFILLGLSSRPEDQKPLFVLFLTMYLITITGNLLIILAI

HSDPQLQTPMYFFLSFLSFTDICFTTTIVPKMLMNFLSEKKTISYAGCLT

QMYFFYALGNTDSYILATMAFDHYVAICDPFHYVTTMNHHHCVLLLAFSC

SISHLHSLLHILLLNLLTFCDSNVIHHFLCEINPLLKLSCTSTFVNEIVI

KTEALVILVTPFLCISFSYIRILITVNKIPSTAGKHKAFSTCGSHLTVVT

LFYGSIFYVYLQPLSSYTVGDRVATIVYTVLSSMLNPFIYSLRNKDLKRG

LKKLMGRRKS*

>LoafORs6.66

MLAAISQSLTFLTLLIPSREKSTIRPENQSSVSEFLLLGLPIRPEQQAMF

SALFLGMYLTTVLGNLLIILLIRLDSRLHIPMYFFLSHLAFSDVSFSSVT

VPKLLINMHTRDQSIPYVGCISQMYFFILFVCLDNLLLAVMAYDRFMAIC

HPLRYTTIMRQELCILLVVGSWFFSCAHALLHTLLLSHLSFCADNTIPHF

FCDLTALLRLTCSDTSLNELVIFTEGGVLVLLPLSVILGSYVIIGATILK

VPSTKRICKALSTCGSHLFVVFLYYGTLAIIYFFPSSNNSKIKDIIASAM

YSVVTPMLNPFIYSLKNRDMKLALQMLYKGGIIFAK*

>LoafORs6.67

MTMETVNQTTSVSEFILLGLSSRPEDQKPLFVLFLTMYLITITGNLLIIL

AIYSDPQLQTSMYFFLSFLSFTDICFTTTIVPKMLVNFLSTKKTISYAGC

LTQMYFLYAFGNTDSCLLAAMAIDRYIAICNPLHYVTIMSHHHCFLLLAF

CCSFPHLHSLLHILLLNLLTFCDSNVIQHFLCDINPLLKLSCSSTFLKDI

TIKTEEVVILVTPFLCISFSYIGILIAVLKIPSAAGKCKAFSTCGSHFTV

VTIFYGSIFYVYLQPFSSYTVRDQVATIGYTILSSMLNPFIYSLRNKDMK

RGLGKLMCRRKF*

>LoafORs6.68

MERVNQTTSVSEFILLGLSSWPEDQKPLFVLFLTMYLITITGNLIILAIH

SDPQLQTPMYFFLSFLSFTDICFTTTIVPKMLRNFLSEKKTISYAGCLTQ

MYFFYALGNTDSYILAAMAFDRYVAICDPFHYVTTMSHHYCVLLLIFSCS

ISHLHSLLHILLLNLLTFCDSNAIHHFLCDINPLLKLSCTSTFVNEIVIK

TEGLVILVTPFLCISFSYIQILITVIKIPSAAGKHKAFSTCGSHLTVVTL

FYGSIFYVYLQPLSSYTVGDQVVTIVYTVLSSMLNPFIYSLRNKDLKRGL

KKLMSRRQS*

>LoafORs6.69P

MLTATSQSLTFLTPLIPSRERSSMRSENQSSLSEFFLLALLLLEEQQGMF

FTLFLGMNLTKMLENLLIRLYCCLHTPMYFFLSPLAFSDVSFSSVTVPKI

LINMHTQDQFILYVGYISQMYFFILFVCLDDFLLAMMAYERFMTICHPLY

YTTLMREELCIFLVDGSLFFFCAHVLLHTLLLSHLSFCADNTIPHFFCDL

TALLKLTCSDTSLNELIIFTEGGVLVLLSLSAVLGSYVSTGPTNLKVPST

KRICKSLSACGSHLLVVFLYYGTHAIIYFF

>LoafORs6.70

MTMERANQTTSVSEFILLGLSSRPEDQKPLFVLFLTMYLITITGNLLIIL

AIHSDPQLQTPMYFFLSFLSFTDICFTTTIVPKMLVNFLSTEKTISYAGC

LTQMYFLYAFGNTDSCLLAAMAIDRYVAICNPFHYVTIMSHHRCFLLLAF

CCSFSHLHSLLHTLLLNLLTFCDSKVIQNFLCDINPLLKLSCSSTFVNDI

TIKTEGVVVLVTPFLCISFSYIRILIAVLKIPSAAGKRKAFSTCGSHFTV

VTIFYGSIFYVYLQPLSSYTIRDRVATIGYTILSSMLNPFIYSLRNKDMK

RGLGKLMCRRKP*

>LoafORs6.71P

GTVLKPKDEKPLFVLFLTMYLITVTGNLFIILVIRSDPQLQNPKYFFLSF

LSFTDSCSQNTGELLVQVKDHLLCWVSDTDVFSVCFA*HQRLHLGSHGL*

PLCGHL*SLLVCHYHEPPLLGPAAGLILLHLLSPFPPVHSPTESSHLL*L

QCIQHFLCNIKPLLKLSCTSTFVNEIVIKIGLVILVTPFLFISFSYVRIL

IRVIKIPSTAEKHKVFSTYCSHLTVVTLFCGSIFYVYLQPLFSYTVRD*V

ETIVCTVLSSMLNPFIYSLRNKDLKRGLKKLMGRRKS

>LoafORs6.72

MERVNQTNSVTEFILLGLSSRPEEQKPLFVVFLTMYLITVVGNLLIILVI

HSDTRLQTPMYFFLSTLSFTDVCYTTTIIPKMLVNFLSKKKTISYAECMI

QMYFFLAFANTESYLLAAMAIDRYVAICDPFHYVTTMSHHRCVLLLAFSC

SISHLHSLLLVLLINRLIFCDSNVIHHFLCDINPLLKLSCSSTFVNEIVI

NTEGLITLVTPFICVIISYLRILIAVLKIPSVARKQKAFSTCGSHLTMVT

LFYGSIIYVYFQPLSSYTVKDRVATVIYTVLSSMLNPFIYSLRNKDMKRG

LEKLMGKKKS*

>LoafORs6.73P

NFTIWTFFCLEGFSRYQKLEIVLFVFSLVMYLITLLGNSTLLLIIIIDSR

LHTPMYLFLGNLSFMDICYTSASIPTLLVNLLSSQKTIVFSGCAVQMYLS

LAMGSTECVLLAVMAYDRYMAICNPLRYSIIMNGQVCVQMASVSWVTGCL

TALLETSFALQVPLCGNLVDHFKCEILAVLKLACTSSLFIDMMVLAISVL

LLPIPLLLICISYIFILSAILRISSAEGRNKAFSTCGAHLTVVILYYGAA

LSMYLKPSSSNSQEIDKIISLLYGVLNPIIYSLRNKEVKDAVK

>LoafORs6.74

MAIGNHSSVTEFFLVGLSQYPELQLSLFVLCLIMYLIILLGNSLLITISI

LDSRLHTPMYFFLGNLSFLDICYTTSTIPQMLITFGSERKSISFIGCVLQ

MVVSLGLGSTECVLLAMMAYDRYVAICNPLRYPIIMNRVLCMHMATWSWI

TGYLNSLVQTSFTMVLPFCGNNIIDHITCEIVALLKLVCSDITINILIMT

VESIVLLMIPLTLIFISYVFILSSILRINSAEGRKKAFSTCSAHLTVVIL

FYGSALFMYMKPKSKDTKTSDEIIGLSYGVVTPMLNPIIYSLRNKEVKEA

VMKVLNRHLHRWKICKALRHVISLMRNKIRSFAFTNEVREPRVKGAFVLA

KPIMELPCFST*

>LoafORs6.75

MENYSAVTEFFLVGLSQYPELQLSLFVLCLIMYLIILLGNSLLIIISILD

SRLHTPMYFSLGNLSFLDICYTSSFVPPMLIIFSSERKSISFTACALQMG

ASLALACTEFVLLAVMAYDRYTAICNPLRYPIVMNRILCVHMAAWSWIIG

CLNSLVQTVLTMMLPFCGNNVIDHLVCELLVLLKHICSDISIIVLMLTVG

TTVFLVIPLLLIFISYVFILSTILRLKSTEGIKKAFSTCSAHLAVVILFY

GSALFMYTKPKSKDTKTSDEIIGLSYGVVAPMLNPIIYSLRNKEVKEAVK

TVLSRYLYSLKI*

>LoafORs6.76

MGRTNQSVTEFVLLGLSGYPELEAIYFVLVLCMYLVILLGNGLIIIVSVF

NSHLHTPMYFFLSNLSFLDVCYTSSSIPLFLSSFLTSKKTISFPGCGVQM

FLSFAMGATECVLLSMMAFDRYVAICNPLRYPIIMSKASYVPMAAGSWIA

GGVNSVLQTSLAMRLPFCGDNVINHFTCEILAVLKLACADISVNVISMIV

ANMIFLVVPVLFIFISYVFILSTILRIPSAEGRRKAFSTCSAHLTVVIVF

YGTILFMYAQPKAKDSSGADKEQVADKIISLFYGVVTPMLNRLIYSLRNK

DVKAAVKNMLCQKLSSEGL*

>LoafORs6.77

MEWENQTIRVEFFLKGLSGYPRLELLFFVLILIMYVFILLGNGTLILISI

LDSHLHTPMYFFLGNLSFLDICYTTTSIPSTLVSFLSERKTTSFSGCAVQ

MFLGLAMGTTECVLLGMMAFDRFVAICNPLRYPIIMSKNSYVPMASGSWF

AGVVNSAVQTMFVVQLPFCRTNIINHFSCEILAVMKLACADISGNEFIML

VATTLFTLMPLLLIVISYSLIISSIIKISSSEGRSKAFSTCSAHLTVVII

FYGTILFMYMKPKSKETLNSNALDATDKLISMLYGVMTPMLNPLIYSLRN

KDVKEAVRLLKERFISK*

>LoafORs6.78

MVKTNCTIISNFIFLGFTHYPKVEIFIFVLCLLIYLITLLGNIILISVSI

LDSHLHTPMYFFLSNLSFLDIWYTSSALTPMVANFVAGENSISFSGCAAQ

MYFSLAMGSTECVLLSMMAYDRYVAICNPLRYPIIMNRRVCAHIAAGSWV

TGCLTALVETMSVLQLSLCGNNTINHFTCEILAVLKLVYVDTSMAQLIML

VISILLLPMPMLLICISYAFILSNILRISSVHGRSKAFSTCAAHLTVVVL

FYGTALSMYLKPSAVESQEIDKFMALVYAGLTPMLNPIIYSLRNKEVKMA

VKKCAFFIPSCK*

>LoafORs6.79

MEWENQTILVEFFLKGLSGYPRLELLFFVLILIMYVFILLGNGTLILISV

LDSHLHTPMYFFLGNLSFLDICYTTTSIPSTLVSFLSERKTISFSGCAVQ

MFLGLAMGTTECVLLGMMAFDRYVAICNPLRYPIIMSKNSYVPMASGSWF

AGVINSAVQTMFVVQLPFCRNNIINHFSCEILAVMKLACADISGNEFIML

VATTLLILMPLLLIVISYSLIISSILKVRSSEGRSKAFSTCSAHLTVVII

FYGTILFMYMKPKSKETLNSNALDATDKLISMFYGVMTPMLNPLIYSLRN

KDVKEAVKLLLKKRFINKQVE*

>LoafORs6.80

MVKTNCTIISNFIFLGFTHYSKVEIIIFVLWLLMFLITLLGNIILISVSI

LDSHLHTPMYFFLSNLSFLDIWYTSSALTPMVANFVAGENSISFSGCAAQ

MYFSLAMGSTECVLLSMMAYDQYVAICNLLRYPIIMNRRVCAHIAAGSWV

TGCLTALVETMSVLQLSLCSNNIINHFTCEILAVLKLVCVGTSMVEFLML

VISILLLPMPVLLICISYAFILSNILRISSVDGHSKAFSTCADHLTVVVL

FYGTALSVYLKPSAVDSQEIDKFMALLYMVLTPMLNPIIYSLRNKEVKTA

VKRLLVRNPLCALFIPSSK*

>LoafORs6.81P

CEILAFVKLACEDISLNEITIMLDSIIFLFSPLLLICLSYFFIFSTVLRI

NSAEGWKKAFSICSAHVTLVIVFYGTIFFMYMKPKSKDS

>LoafORs6.82

MKRNNDSMLTEFVLVGLSAHPKLQTVFFVLVLWMYLMILLGNGVLISVII

YDSHLHTPMYFFLCNLSFLDICYTSSSVPLILNSFLTVRKTISFSGCMVQ

MLLSFAMGATECVLLGMMALDRYVAICHPLRYPVIMSKGAYVPMAAGSWV

AGLADSVVQTSLAVQLPFCTNNVISHFVCEILAILKLACADISINVISMA

GSNLIVLVIPLLVISTSYIFIVATILRIPSTEGKCKAFSTCSAHLTVVII

FYGTIFFMYAKPKSKNSVATDNQDIIEALISLFYGVMTPMLNPLIYSLRN

KDVKAALKNMLGRKHFSDRI*

>LoafORs6.83

MGKFNQTFVREFVLLGLSGYPKLEIIYFVLILVMYLMILIGNSVLIIASI

FDSHLHTPMYFFLGNLSFLDICYTSSSVPSTLVSLISKKRNISFPGCAVQ

MFIGFAMGSTECLLLGMMAFDRYVAICNPLRYSVIMHKLVYVLMASVSWL

SGGINSIVQSALAMQLPFCGKNIINHFTCEILAVLKLACADISLNIITMV

VSNIAFLVLPLLVIFFSYMFILCTILRMNSATGRRKAFSTCSAHLTVVII

FYGTIFFMYAKPKSQDLLEEDKLQALDKLISLFYGVVTPMLNPIIYSLRN

KDVKAAVKYLLNHKPV*

>LoafORs6.84

MDKINQTFVRDFILLGLSGYPKLEIIFFALILVMYLVILIGNGVLIIASI

FDSHLHTPMYFFLGNLSFLDICYTASSVPSTLESLISKKRNISFSGCAVQ

MFLGFAMGSTECFLLGMMAFDRYVAICNPLRYPVIMSKFVYVLMASVSWL

SGGINSIVQTALAMRLPFCGNNIIDHFLCEILAVLKLACVDISLNITMLA

VSNMAFLVLPLLVIFFSYMLILYTILRMNSATGRRKAFSTCSAHLTVVII

FYGTIFSMYAKPKSQDMVGKNEMQASEGLISMFYGVVTPMLNPIIYSLRN

KDVKAAVKYLLGQKALNK*

>LoafORs6.85P

ICNRFFFLGFTHYPKAKIIIFVLSLLIYLITLPGNIILISVSILDSHLHS

PMYFFLSSLSFLDIWYTSSALTPVVARFVTGKNSTSFSGCTAQVYFSLVV

GSTKCVLLSMMAYDRYVAICNPLRYPIIMNRRVFAHIAA

>LoafORs6.86

MVGFNQTSSMIGFILLGLSAHPKLEKTFFVLILMMYLVILLGNGVLILVT

MLDCRLHTPMYFFLGNLSFLDICYTTAAVPLILESFLAPRKAISFSACFG

QMFLSFAMGATECVLLSMMAFDRYVAICKPLRYPVVMSKAAYVPMASGSW

AAGIINSVVQTVQAMRLPFCGDNVINHFTCEILAVLRLACADISINVISM

VVANMIFLAIPVLFIFVSYVFILATILRIPSAEGKKKSFSTCSAHLTVVV

VFYGTILFMYGKPKSKDPLGTDKQDVSDKLISLFYGVVTPMLNPIIYSLR

NKDVKAALRNLVAQKHFN*

>LoafORs6.87P

MESPNQSAVTEFVLLGLSAHPKLEKTFFVLILLMYSVILPGNGVLILVTV

SDSRLHTPMYFFLGNLSFLDICYTNSSVPLVLDGFLTPRETISFSGCAVQ

MFLSFA

>LoafORs6.88

MEVTNQSAVTEFVLLGLSDQPTLEKTFFVLISLMYLVILLGNGVLILVTV

FDFHLHTPMYFFLGNLSFLDICYTTSSIPLVLDGFLTPRKTIFFSGCAVQ

MFLSFAMGATECVLLGMMAFDRYVAICNPLRYSVIMSKAGYVPMAAGSWV

AGGTNSLVQTSLAVQLPFCGDNVINHFTCEILAVLKLACADISINVISME

VANVIFLGVPVLFIFVSYIFILTTILRIPSAEGRRKTFSTCSAHLTVVVI

FYGTILFMYAKPKSKDPLEADKQDVSDKLISLFYGVLTPMLNPIIYSLRN

KDVKVAVKKLLSQKCFTQ*

>LoafORs6.89

MESANQTSSVTEFVLLGLSAHPKLEKMFFVLILLMYLVILLGNGVLILVT

VSVPRLHTPMYFFLGNLSFLDICYTTSSVPLILDSFLTPRKTIPFSACAV

QMFLSFAMGATECVLLGMMAFDRYLAICNPLRYPVIMSKVVYVPMAANCW

AAGSGASIVQTSLAMRLPFCGNNIINHFTCEILAVLKLACADISINVISM

GVTNVIFLGVPVLFIFVSYIFILTTILRIPSAEGRKKAFSTCSAHLTVVV

VFYGTILFMYGKPKSTDPLGTDKQDVSDKLISLFYGVVTPMLNPIIYSLR

NKDVKATVRNLVFQKHFTQ*

>LoafORs6.90

MVKSNQTSPVVGFILLGLSAHPLLEKIFFVLIFLMYLVILLGNRVLTLVT

ILDFRLHAPMYFFLGNLSFLDICYTTSSVPLILDSFLTPRKTIPFLACAV

QMFLSFAMGATECVLLSMMAFDRYVAICNPLRYPEIMRKAAYMPMVASSW

VAGSTTAMIQTSLAMRLPFCGDNVINHFACEILAVLKLACAGISINVISM

GVANVIILGIPVLFIFSSYVFIIATILRIRSAEGRKKAFSTCSAHLTVVV

VFYGTILFMYAKPKSKGPLGADKQDLSDKLFSLFYGVVIPMLNPIIYSLR

NKDVKAAVRNLVFQKHLIR*

>LoafORs6.91P

MEKVNWTSPVIEFILLGLSDYPKLEKIFFVLVLLMYLVILLGNGVLILVT

ILDSHLGTPMYFFLGNLSFLNICCIT*SVPLVLDSFLTPRETISVSACAE

QMALSFAMAGTEYLFLSMMAFDHFVAICNSLRYPVIMSKVSMCLWLPA/L

KLACADISINVISMGVTNVIFLGVPVLFISLFCVFIIATILRIPSAEGKK

KAFSTCSVVVFFYGTLFFIYRKPKSKDLLGADKQDFSDKLISLFCGVVTP

MLNPIIYSLRNKDVKAAAKNLVA

>LoafORs6.92

MEALNRTGVSEFFLKGFSAYPALEHLLFPLCSAMYLVTLLGNTAIVAVSV

LNVRLHTPMYFFLGNLSILDICYTSSFAPLMLVHFLLAQKTISFTGCAVQ

MCLSLSTGSTECLLLAVMAYDRYLAICRPLQYPVLMSRQLCLLLVGASWA

FSLLKSVTETVIAMRLPFCGHRVVSHFTCEILAVLKLACGDTSVSEGFLL

AGSILLLPLPLALICLSYALILVTILRVPSAAGCHKAFSTCSAHLAVVVL

FYGAIICMYMKPKSKEAHISDEVFTVLYAVVTPMLNPVIYSLRNKEVKEA

ARKLWGRIWTSR*

>LoafORs6.93

MMDGANQTAIREYILLGLSEHHNLEMVLFVLCLGIYCVDVMGNSLLIALN

MLDPHLHNPMYFFLSNLSLMGILGISSFVPLTLVNFLEARRTISFPGCAL

QMYLTLALGSTECLLLAVMAYDRYVAICQPLRYSELMSGQLCMWMAVLSW

GIGFTNSLLQSILAWHLSFCGHNVINHFFCEILAVIKLACGDISLNALAL

MVATAVLTLTPFLLMFLSYIFILAAILRVPSAAGWSKAFSTCSSHLIVVV

IFYGTISFMYLKPKAKDPDLDKIITLFYGDMTPSLNPTIYSLRNTEVKAT

VIALLREDLLSRKMSHFCCCTPSLSVRIG*

>LoafORs10.1P

FLIIAVMSLDCYVAICRSLHYPTIMNKRTCFLLVTVCFALGFTLISGPVV

KVSQLSFCGPNAIPHFFCDLGPLILLSCSDTKFLETLAFILALFIILTSV

IITL/KAFSTCSSHLIVPSLLYGSCVFMYGKPKQTNRLYSNREAALANTV

VSPLLNPIIYTLRNKQVHQALKETMCRMKIAR

>LoafORs10.2

MSNQTQVTEFILQGFSEHPEYRLLLFGCFLSLFSVALTGNVLIILAITFN

LGLHTPMYFFLFNLATMDIICTSTIMPKALEGLVSEESSISYGGCMTQLY

FLTWSASSELLLLTVMAYDRYAAICHSLRYSTIMSKAFCSMLAAGVWGLC

AFNTAIHTGLMLLLNFCGPNVITHFFCEVPPLLLLSCSSTYVNSVMIVLA

DAFYGILNFLMTIVSYGFIISSILKMRTKEGKKKAFSTCSSHLIVVCMYY

TAVFYAYISPVSSYSVEKSKLAGVLYTMLSPTLNPLIYTLRNKEVKAALR

KIFPFCRN*

>LoafORs11.1

MFCHCFQESRGVVIPSWENQTTIAEFVLRGFTSIRQLNISLFMMFLVFYT

ITVSGNILIGLLVLFSHHLHTPMHFFLVNLSFLEIWYTSNIVPKMLLIII

AEQKTISVPGCLAQFYFFGSLAATECLLLAVMSYDRYLAICQPLRYPILM

TGPLCIKLAASSWLCCFLLTAITMVLLSRLTFCGPNEIDHFFCDFTPLVR

LSCGDTSRTETIAFATSSAVTLVPFLLITASYSCILAAILRIPSGTGQRK

AFSACSSHLTVVTVFYGTLIAVYLVPSANSSQLLGKGFSLLYTILTPMFN

PIIYSLRNRDIHEALKRNLSKKSGFLK*

>LoafORs12.1P

NLGMITLIWMGSRLHTPTYFSLSHLSFVNVCSSSAIGPKMLTDIFVEKKV

ISFFGCAAQDVF*SVCTECFLLASMVYDQYMAICKPLLYMLIMSQRVCVQ

LVVGPYAVGLKSTMTQTTFTF/FYFHLPRRGSNTINHFFRNLLPVLSLAR

ADNQVNTNSLFILAGALGVLSGVITLVSYIYIIMAILKIGSAGGRRE

>LoafORs13.1

METNETLVTEFVLTGLTDNPLLQVPLFLVFLVIYLVTMGGNLGLIALIWK

DPHLHTPMYLLLGGLAFADACTSSSVTPRMLVNILDKSQMISLFECMAQY

YFFGFSATTECFLLVAMAYDRYVAICNPLLYPVVMSNRLCTWLISISYVI

GFLHPIIHVGLLFRLTFCQTNLIHHFYCEILPLYTISCTDPSINALVVFI

FAAFIQAFTFMTIVVSYTRVLFAILKKKSEKGRRKAFSTCSAHLLSVSLF

YGTLFFMYVRPGSGPDKYQDKMYSLFYTIIIPLLNPFIYSLRNKEVLAAL

RKVIKK*

>LoafORs13.2

MAEENETLLAEFVLMRLTGHPELQVPLFLVFLVIYLTTMVGNLGLIGLIC

KDPHLHTPMYLFLGSLAFADACTSSSVTPKMLMNFLSKYHVISISDCMAQ

FYFFGSSATTECFLLVVMAYDRYVAICNPLLYPVVMSNSLCTQLIGVSYA

IGFVHSVVHVTLLFRLTFCRFNIIQDFYCEILQLFKISCTDPTVNVILVL

ISSAFIQVLTFMTIIISYTCVLFAILNKKPEKGRSKAFSTCSAHLLSVSL

FYGTLFFMYVRPGSGPAENQDKMYSLFYTTIIPLLNPFIYSLRNKEVSGT

LRRIMKK*

>LoafORs13.3

MTEENETLVAEFVLMGLTGHPELQVPLFLGFLVIYLTTMVGNLGLIGLIC

KDPHLHTPMYLFLGSLAFADACTSSSVTPKMLMNFLSKNHMISISDCMAQ

FYFFGSSATTECFLLVVMAYDRYVTICNPLLYPVVMSNQLCMQLIGVSYA

IGFVHSVIHVTLLFRLTFCRSNIIQYFYCEILQLFKISCTDPAINTFLVL

IFSAFIQVITFTATIVSYTCVLFAILKKKPEKGRSKTFSTCSAHLLSVSL

FCGTLFFMYVHPGSGPAENQDKMYSLFYTIMIPFLNPFIYSLRNKEVIDA

LRRIMEK*

>LoafORs13.4

METNKTLVTEFVLTGLTDNPSLQVPLFLVFLVIYLVTMEGNLGLIALIWK

DPHLHTPMYLLLGGLAFADACTSSSVTPRMLVNILDKSQMISLFECMAQY

YFFGSSATTECFLLVAMAYDRYVAICNPLLYPVVMSNRLCTGLISISYVI

GFLHPIIHVGLLFRLTFCRSNIIHHFYCEILPLYTISCTDPSINALVVFV

FSAFTQAFTFMIIIVSYTRVLFAILKKKSEKGRSKAFSTCSAHLLSVSLF

YGTLFLMYVLPGSGPDKYKDKMYSLFYTIIIPLLNPFIYSLRNKEVLAAL

RKVIK*

>LoafORs13.5

MTEENETLVAEFVLMGLTGHPELQIPLFLGFLMIYLTTMVGNLGLIGLIC

KDPHLHTPMYLFLGSLAFADACTSSSVTPKMLMNFLSKNHVISIFDCMVQ

LYFFGSSATTECFLLVVMAYDRYVAICNPLLYPVVMSKSLCTQLIGVSYA

IGFVHSVIHVTLLFRLTFCRSNIIQYFYCEILQLFKISCTDPTINAFLIL

VFSAFIQVLTFMAIIVSYTCVLFAILKNNSEKGRSKAFSTCSAHLLSVSL

FYGTLFFMYVRPGSGPAENQDKMYSLFYTIIIPLLNPFIYSLRNREVSGA

LRRLMKK*

>LoafORs13.6P

MPEENRTLVTEFVLTGLTDRLWLQVPLFLVFLVIYLITMVGNLGLMALIW

RDPHLHTPMYLFLGGLAFADACTSTSVAPRMLINFLDRTTMISLAECITQ

FFFF/FFFFAFSATTECFLLVVMAYDRYVAICNPLLYPVVMSNRLCTQLI

SISYAIGFLHSLIHVVLSLRLTFCRSNIIHYFYCEILQLFKISCTDPSTN

ALMIFIFGIFIQIFTLMTIIISYIRVLFDILKKKKSEKGRSKAFSTCSAH

LLSVSLFYSTLFFMYVLPDKYQDQMYSLFYTVIIPLINPFIYSLRNKEVI

GALKKVTKK

>LoafORs13.7

MSEENRTLVTEFVLTGLTDHLWLQVPLFLVFLVIYLITMVGNLGLTALIW

KDPHLHTPMYLFLGGLAFADACTSTSVTPRMLVNFLDRTTMISLAECITQ

FYVFASSATTECFLLVVMAYDRYVAICNPLLYPVVMSNRLCTQLISISYA

IGFLHPLIHVVLLLRLTFCRSNMIHYFYCEILQLFKISCTDPSTNALMIF

IFGALIQISTLMTIIISYTRVLFDILKKKSEKGRSKAFSTCSAHLLSVSL

YYGTLIFMYVRPASGLAEDQDKMYSLFYTILIPLINPFIYSLRNKEVIGA

LKRVTKK*

>LoafORs13.8P

MSEENRTLVTEFVLTGLTDRLWLQVPLFLVFLVIYLITVVGNLRLMALIW

KDPQLHTPMYLFLGGLAFVDACSSTSVTPRMLVNFLDRTTMISLAECITQ

FFFF/FFFFASSATTECFLLVVMAYDRYVAICNPLLYPVVMSNRLCTQLI

SISYAIGFLHSLIHVVLSLRLTFCRSNITHYFYCEILQLFKISCTDPSTN

ALMIFIFGVFIQIFTLMGIIISYICVLFDILKKKLEKGRSKAFSTCSAHL

LSVSLFYGTLFLMYVLPESGPDKYQDQMYSLFYTIIIPLINPFIYSLRNK

DVIGALKGVPKK

>LoafORs13.9

MSGMAKENRSLTTEFILKGFTDHPDLKALLFVGFFAIYLITMVGNLGLVV

LIFMERRLHTPMYIFLGNLALMDSCCSCAITPKMLENFFSEDRMISLYEC

MAQFYFLCLAETADCFLLAAMAYDRYVAICRPLQYHTMMSKKLCIHMTIG

SFIASNLHSMIHVVLLLRLTFCRSNQIDHFFCDILPLYRLSCTDPFINEL

MIYIFSMPIQVFTIATVFISYLCILFTIFRTKPKEGRGKAFSTCASHFLS

VSIFYICLLMYIRPFEEGDKDIPVAIFYTIVIPLLNPFIYSLRNKEVINA

LKKIRRNYNILKQTLSSTTN*

>LoafORs13.10

MFESNHTVTTEFILTGFMGHPDLKILLFVVFFAIYLITMVGNLGLVALIF

MERHLRTPMYIFLGNLALMDSCCSCAITPKMLENFFSEDRMISLYECMAQ

FYFLCLAETADLCLLAAMAYDRYVAICRPLQYHTMMSKKLCIQMTIGSYI

AGNLHSMIHVVLLLRLTFCGSHQINHFFCDILPLYRLSCVNPYINELMVL

IFSGLLQTFTITIVLISYLCILFTIFKMKSKEGRGKALSTCASHFLSVSI

FYGSLLFMYIRPSSFKEGDKDIPVAIFYTLIIPLLNPFIYSLRNKAIINI

MKTIMKRKPHNMVK*

>LoafORs13.11

MSEGNHTVTTEFILTGFMGHPDLKILLFVVFFAIYLITMVGNLGLVALIF

MERHLRTPMYIFLGNLALMDSCCSCAITPKMLENFFSEDRMISLYECMAQ

FYFLCLAETADCFLLAAMAYDRYVAICHPLQYHTMMSKKLCIQMTIGSYI

AGNLHSMIHVVLLLRLTFCGSHQINHFFCDILPLYRLSCVNPYINELMVL

IFSGLLQTFTITIVLISYLCILFTIFKMKSEEGRGKALSTCASHFLSVSI

FYGSLLFMYIRPSSFKEGDKDIPVAIFYTLIIPLLNPFIYSLRNKAIINI

MKTIMKRKPHNMVK*

>LoafORs13.12

MTKDNHSLTTEFVLIGFTNQADLKMLLFVVFFAIYLITMVGNLGLVALIF

KKHRLHTPMYIFLGNLALMDSCCSCAITPKMLENFFSEDRMISLYECMAQ

FYFLCLAETADCFLLAAMAYDRYVAICHPLQYHTMMSKKLCIQMTIGAYI

AGSLHPMIHVVLLLRLTFCVSHQINHFFCDVLPLYRLSCVDPYINELMVL

IFSGSIQIFTITIVLISYLCILFTIFKMKSKEGRGKALSTCASHFLSVSI

FYGSLLFMYIRPSSVKEGDKDIPVAIFYTLVIPLLNPFIYSLRNKDVINI

MKAIMKKRKTHNILKWISPVTN*

>LoafORs13.13P

MAQDNYSLTTEFILIRFTDHPSLKILLFVVFFAMYLITMEGNLGLVALIF

MERRLHAPMYIFLGNLALMDSCCSCAITPKMLENFFSEDRMISLCECMAQ

FYFLCLAETADCFLLAAMAYDCYV/LRYHTMMSKQLCIQMTTRSFIASKL

RSMIHVVLLLRLTFCRSNQIDHFFCDILPLYRLFCTDLFINELMVCIFSM

PIQLFTIATVFISHLCTLFSIFRMKSKDGRSKAFFTCASHFLSVSAFYIC

LLMYTRSFQEGGKDIIFTIFCTIIIPLLN

>LoafORs13.14

MISISTEKVDMTKENYSLTTEFMLIGFTDHPGLKTLLFVVFFTIYVITMV

GNLGLLALIFMERRLHTPMYIFLGNLALMDSCCSCAITPKMLENFFSEDR

MISLYECMAQFYFFCFAETANGFLLAAMAYDRYVAICRPLQYHTMMSKQL

CIRMTIGVHTAGNLHSMIHVVLLLRLTFCGSHQINHFFCDVLPLYRLSCV

DPYINILMILIFSGSVQIFTISVVLTSYLGILFTIFKMKSKEGRGKALST

CASHFLSVSILYGSLLFMYIRPSSVKEGDKDMTVAIFYTLVIPLLNPFIY

SLRNKDVKNVMKRVLKKRKPHIILK*

>LoafORs13.15P

MTKDSHSLTIEFIL*DF*SPRYENLSVCGILATYLIAVSGSLDLVVLIFM

EHHLHPPKYIFLDNVALMDSCCSCAITLKTLENF*GQNDFPH*VHGTILF

SLPC*NCTLLSRGSNGL*PLRGHM*STAVPHHDVEETLHSYDPRNLHN*L

PAFHDSYFASIKVKFLQV*SNSSLFCDTLPLYRLFCNDPFINELMVGIFF

NAYSNLHHCHCLDL*SLHPFSIFKMKSKDGRSKAFSTCTSHFLSVSIFYF

CLLMYT*PLEGNKDIALATFYAIIIPLLNLCICSLRNKEVTNALKKIMKN

YNIPK*TSSFMAN

>LoafORs13.16

MISISTQKVEMTEDNYSLATEFMLIGFMDKPGLKILLFVVFFTIYLITMV

GNLGLVALIFMERRLHTPMYIFLGNLALMDSCCSCAITPKMLENFFSEDR

MISLYECMAQFYFFCFAETADCFLLAAMAYDRYVAICSPLQYHTMMSKKL

CIQMITGSYIAGNLHSMIHVVLLLRLTFCGSHQINHIFCDVLPLYRLSCI

NPYINELMIHIFSGSIQIFTITVVLISYLCILFTVFKMKSKEGRGKALST

CASHFLSVSMFYGSLLFMYIRPSSVKEGYKDIPVAIFYTLVIPLLNPFIY

SLRNKEVANVMKRIMKNRKHHNVLKQIPPVTN*

>LoafORs18.1P

HCLCSNLGVTSLACDDRRPNSICQLVLAWLGMGSDLSLIILSYTLILRSV

FRLNSAEAASKALSTCTSHLILILFFYTVVVVISVTHLEESKASM

>LoafORs21.1

MQFVLLGFSDLSHLQGFLSGVFSIIYLIVIIGNSLIIILIRLDPALQTPM

YFFLANFSLSEISYVTVTLPRMLVNLWTQDRSISVLECATQMCFFLMLGA

TECFLLAVMAYDRYVAICNPLHYPLVMNQKMCVQLAVGSWIIGIPVQIGQ

TATVFSLHFCNCNQINHFFCDIYPIIKLACGDTSAHEMSVYAVTMLFAAV

PFMLILASYSKIISAILKLPTASGQAKAFSTCSSHLLVVVLFFGSATITY

LRPKSYHSAGTGKLLSLFYTMVTPMFNPMIYSLRNKDVIAVLRKLLLKKK

YDR*

>LoafORs21.2

MELIEGNYTLVTEFVLLGFPTRPELQIVLFLVFLMLYGVILMGNIGLIML

IRIDSRLQTPMYFFLSNLSFVDLCYSSVIVPKMLVNFLSENKSISYYGCA

LQFYFFCTFADTESFILAAMAYDRYVAICNPLLYTVVMSRGIRVWLIVLS

YIGGNISSLVHTSFAFILKYCDKNVINHFFCDLPPLLKLSCTDTSVNEWL

LSTYGSSLKIICFIIIVISYYFILLSVLKIRSSSGRKKTFSTCASHLTSV

VIYQGTLLFIYSRPSSLYSPNTNKIISVFYTIVIPVLNPLIYGLRNKDVK

DAAKKALRSKTDSS*

>LoafORs21.3P

LLSNHGMIV*IRMDSQLQMPMYFFLSHLSFCDLCYPTAIESKMPVDILAK

DKSISFYGCALQFFIFSLW/VFGDSECLLLVALTFDQYKAISNHLLYTVN

MSSSVCSMLMFGVYLVGMVDALIYNTLNFHLFFCESDEINHFFCNLPLLL

LLSYSDIQVNELILFTVF/FCFIELNTVSAVLVSYGCIIFSALKIHFSEG

RFKAFSTCTSHLTAVAIFEGTMLFMCFWPSSAYSLD

>LoafORs21.4

MDGENCSSLTEFHLLGITNNPEIKAAVFIMFQVVYIIILVANLGMIILIR

MDSQLQTPMYFFLSHLSFCDLCYSTAIGPKMLVDLLAKDKSISFYGCALQ

FFIFCVFADSECLLLAVMAFDRYKAISNPLLYTVNMSSSVCSVLMAGVYL

VGTVDALIHTTLTFRLCFCGSNEINHFFCDIPPLLLLSCSDTQVNELVIF

TIFGFIELSTISGVLVSYCYIIFSVLKIHSAEGRFKAFSTCTSHLTAVAV

FQGTMLFMYFRPSSAYSPDQDKMTSLFYTLVIPMLNPLIYSLRNKDVKGA

LEKLKNKRWF*

>LoafORs21.5

MAGENCSSLTEFHLLGITNKPEIKATIFTMFLVVYLIILVANLGMIILIR

MDSQLQTPMYFFLSHLSFCDLCYSTAVGPKMLVDLLAKNKSISFYGCALQ

FFIFCFFADSECLLLAVMAFDRYKAISNPLLYRVDMSSRVCSALMAGGYL

VSMVDALIHTTLTFHLCFCGSNEINHFFCDLPPLFLLSCSDIQVNELALF

TIFGFIELSTISGVLVSYCYIILSVLKIRSAEGRFKAFSTCTSHLTAVAI

FQGTGLFMYFRPSSAYSLDQDKMTSLFYTLVIPMLNPLIYSLRNKDVKEA

LKKLKNKNWFY*

>LoafORs21.6

MENQNQNKVTEFILLGLTKNPELRKIFSAVFLIMYVATVPENLLIVVTMT

ASQSLRSPMYFFLPSVSLMDATYSSVIAPKMIVDSFSESATISLEGCMIQ

LFAEHFFGGVSIILLIVMAYDRYVAICKPLHYMTIMKSQVCCLLLGGAWV

GGSMHATIQLLFMYQIPFCGPNVIDHFMCDLFPLLTLACMDTCILGLLVI

HNSGVMCVTIFLTLMVSYVVILCSLKSCSSEGWRKALSSCGSHLTVIVLF

FVPCIFLYVRPLATYPIDKAMAVSFTIIAPMLNPLIYTLRNAEVKNTMKK

LWKRQQILDCH*

>LoafORs21.7

MQNKSFVTEFVLLGLSWNPSVQKMEFVVFLFCYMATVGANLLVVVTIVSS

LTLLRSPMYFFLAFLSFLDACYSSAFAPKMIVDSLYEKKTISFKGYMTQL

FAEHFFAGMEVIILTAMAYDRYVAIFKPLHYPSIMNWRLFGILMGVAWTG

GFLRSVIQIIFILQLPFCGPNIIDHFLCDLNPLFKLTCTDTHILSLSLVA

SNGFICIIIFSLLLISYCVILFSLRTHSSAGRLKALSTCGSHIAVVVLFF

VPCIIVYARPPSTFLFNKMVVIVYTFVTPLLNPLIYTFRNKEVKNVMRKL

WTRLLVVSDEK*

>LoafORs21.8P

MQNQSFVTEFVLLGLSQNPNVQKTGFVIFLFSYFATVGGNLLIVVTIISS

PALLGSPMYLFQAFLSFLDACYSSAFAPKMIVDSLHERKTISSEGCMTQL

FAEHLFAGAEMIILTAMACDRYVAICKPLRYLPITNWRLCGILMG/GVAW

TGGFLHSVVQILFTFQLPFCGPNVINYFLCDLYPLLELACTDTHILGLLV

VANSGFLCIINFSLLLISYCVILFSLRTHSSEGRRKALATCGSHISVVVL

FFVPCIFLYARPSSAFSFDKMVAIFYTIVTPLLNPVIYTFRNK

>LoafORs21.9T

MQNQSFVTEFILLGLSQNPNVQKIGFVVFLSIYIATIGGNLLNVVTISTS

LALLTSPMYFFLAFLSFLDVCFSSVIAPKMIVDSLHERKTISFEGCMTQL

FAEHFFAGVEMIVLTAMAYDRYVAICKPLNYSSIMNWRLCGILMGVAWAG

GFLHSVIQILFTFQLPFCGPNVIDHFICDLYPLLELACTDTHILGLLVVA

NSGFICIINFSLLFISYCFILFSLRTHSFEGQWKALSTCGSHITVVVLYF

VPCIFVYTRPPSAFSFDKMVTIFYTILTPLLNPLIYTSGIRKCK

>LoafORs21.10

MELNSSVTEFILFGLTQDVLKGKLVFVIFLFLYLATLFANLFIVMTIRYS

QMLGGPMYFFLFYLSFTDACYSTTTAPRLIIDAISEKKVISYNECMAQIF

AGHFFGCMEIFVLILMSFDRYMAICKPLRYTSIMSQRVCGALLNLAWVGS

CIHSLVQVFLVLKLSFCGPNVIDHYFCDMQPLLKLACMDTYVINLLIVFN

SGAICTVSFIVLIISYVFILHSLSNKSAEGRKKALSTCTSHIIVVILFFV

PCIFTYSRPPISFPVDKMVAVFYTIGTPLLNPLIYSLRNADVKNAMRKLW

CNKL*

>LoafORs21.11P

LTTMAYDHYVAICKQLHYPSIMSWRLCILMGVAWTGGFLHSVIQILFIFK

LPFCGPNVTDHFICDL*ALFELVCSDTHV/ACLL*HSCFFLVVFNNGFIC

IINFSLLLISYCVILLLL*VHSSEGQRKFLFTCGSHITVMVLFLVLCILV

YT*PSSAFSFNKLVAMFYTILTP

>LoafORs21.12

MMQNQSFVTEFILLGLSQNPNIQKIVFVVFLFIYIATVGGNLLIVVTIIS

SPALLGSPMYFFLGFLSFLDACFSSVIAPKMILDSLYERKTISFEGCMTQ

VFAEHFFGGVEMIVLTAMAYDRYVAICKPLHYSSIMNWRLCGILMGIAWT

GGFLHSVIQILFTFQLPFCGPSVIDHFFCDLYPLLELACTDTHILGLLVV

VNSGFICIINFSLLLISYCAILLLLRTHSSEGRRKALSTCGSHIAVVVLF

FVPCIFEYARSPSAFSFDKMVAIFYTILTPLLNPVIYTFRNKEVKNAMRK

LWTRLVMVSDEK*

>LoafORs21.13P

MELNSSVTEFILFGLTQDVLKKKIVFVVFLFLHLATLLANLFIVMTIRYS

QMLGGTL*FFLFYLSFADACYSTTTASRLIIDAISKKKVISYNECMTQVF

ATHFF/FFGCMEIFVLILMSFDRYVVICKPLRYTTIMSQCVCCALLNLAW

VGSCIHSLVQVFLVLKLPFCGPNVIDHYSCDVQPLLKLACMDTYVINPLM

VFNSGAICMVSFIILIIS*VFMLCSVSNKSAE/KKKALSTCTSHIIVVIL

FFVPHIFTYTRPPITSLVDKMVAVFYTMGTPLLNPLIYSLRNTDIKNSIR

KLW*NKL

>LoafORs21.14P

MQNKSFVTEFVLLGLSWNLNVPKTVFVVFLFVYFATLGGNLLIVVAISSS

PALLSSPIYFFLAFLSFLDACISSVIAPKMIVDSLYDRKTISFEGCMTQL

FAGHFFAGVEVIVLTAMAYDRYVAICKPLHDASVMNWRLCGILTGVAWTG

GFLHSVVQILFTFQLPFCGPNVVDHFMCDLYPLLELACTDTHILGLLVVA

NSGFICIINFFLLLISYCVILL/LRTHSSEGRLKALSTCGCHIAVVVLFF

VLCIFVYARPPSVLFCDKMVALFYTIVTPLLNPMIYTLRNKEVKNATRKL

WTKL

>LoafORs21.15

MTNQSCVTEFVLLGLSQNPNSQNIIFVVFLLTYIATVGGNLLIVVTIISS

LALLGSPMYFFLAFLSFLDACFSSVIAPKMIMDSLYERKTISFEGCMTQL

FAEHFFPGVEVIVLTAMAYDRYVAICKPLHYPFIMNWRFCGILMGLAWTG

GFLHSVIQILCIFQLPFCGPNVIDHFMCDLYPLLALACTDTHILGFFVVA

NSGLICIINFSLLLISYCVILVSLRTHSSEGRRKALSTCGSHIAVVVLFF

VPCIFMYARPPSTFSFEKIVAIFSTLLTPLFNPMIYTFRNKEVKNAMRKL

WTRLVVVSDEK*

>LoafORs21.16

MELNSSVTEFILSGLTQDVVKEKIVFVVFLFLHLATLLANLFIVMTIRYS

QMLGGPMYFFLFYLSFADACYSTTTAPRLIIDAISKKKVISYNECMTQIF

AAHFFGCMEISVLILMAFDCYVAICKPLRYTTIVSQCVCDEFLNLAWVGS

RIHSLVQIFLVLKLPFCGPNVIDHYFCDVQLLLKLVCMDTYVINLLIVFN

SGAICMVSFIILIISYIFILRSLSNKSTEGRKEALSTCTSHISAVILFFL

LCIFTYTRPPITFPVDKMVAVFYTIGTPLHNPLIYTLRNADIKNAMRKLW

WDKL*

>LoafORs21.17P

MAMNNSVTEFILFGLTQDAEKQKVIFGIFLILYLLTLLGNFLIVVAIKTS

HTLGSPMYFFLFYLSFADACFSTTTAPRLIVDALSQEKTISYHECMIQVF

AAHFFGCMEIFVLILMAFDCCVAICKPLRYTTIMSRHVCGMLVILAWVGS

CIHSSAQIFLSLKLPFCGPNVIDHYFCDLQPLLKLACMDTYVINLLIVSN

SGAICMVSFRLLPISYVVILYSLRNHSAEGRRKALSTCTSISLWLSYFLV

HVYSYTQAHQLHFQWTRWWLCFIQFGHPCSTL*SIH*GMQK*KMP*KSYG

VANYDFS**IKKKNAEVKNAMKKLWCSKL

>LoafORs21.18

MGNQNNVTEFILLGLTKNPELRKIFSTVFLIMYVTTMLGNLLIVVTMTAS

QSLRSPMYFSLTYLSLMDAIFSSVITPKMIVDSFSESTTISLKGCMTQLF

AVHFFGGVSIILLIVMAYDRYVAICKPLHYMTTMSPRVCCLLLGGVWVGG

FLHAITQLLFMYQIPFCGPNVIDHFMCDLFQLLTLACMDTRILGFLVILN

SGVMCVTIFLILIVSYMIILCSLKSCSSEGRHKALSTCGSHLTVIVLFFV

PCIFFYVRPVATYPIDKAMAVSDIITPMLNPLIYTLRNAEVKNAMKKLWI

Q*

>LoafORs21.19

MLLNNNVTEFILLGLTQEPVKRKIVFAFFFLFYLGTLLGNLLIIITIKTS

RALESPMYFFLFYLSLSDTCFSTSIAPRMIVDALLKNNTISFSECMIQVF

SFHFFGCLEIFVLILMAVDRYVAICKPLHYISLMSRQVCSVLVAIAWVGA

CVHSLVQIFLTLSLPFCGPNVIDHYFCDLQPLLKLACADTYVINLLLVSN

SGAICTVSFVMLMFSYVIILHSLRNHSAEGRKKALSTCISHIIVVILFFG

PCIFIYTRPATTFPMDKMIAVFYTIGTPFVNPLIYTLRNSEVKNAMRKLW

SKKLISDDQR*

>LoafORs21.20P

FLAFLLRDVLGNSMITVTIKTSQALESPMYFFLFYLSLSDTCFSTSIAPK

MTVDAFLKNNNISFSECMIQVFSFHFFGCLAILILILMSVDLYVTICKPL

HYMSIMNERVCSVSVAIAWVEACVHSSVQIFLTLSLPFCGPNVTDHYFCD

LQPLLKLACTDTYMTNLLLVSNSGAICIVSFVMLMFSYVIILYSLRNHSA

EGRKKALSTCISHIIVVILFFVPCIFIYTRPATTFPMDKMITVFYTFGTP

LLNPLIYTLRNAEVKNAMRKL*SKKQISEDQR

>LoafORs21.21P

LRSPRYFFLAYLSLMDAVYSTAISPKKILDLLCDKKTTSFPACMGQLFIM

HLSGGAEVFLLVAMAYDRYVAICKPLHYLTIMN*QVCILLLVMAWVEGFL

HSVVQLLFVHRLPFCGPNVIDHFMCDMYPLLELACSEPYFIGLTVIANGG

AICMVIFILLLISYGAILKSLKTHSQEGRRKALSTCSSHITVVVLFFVPC

IFMYVRPVSNFPIDKSMTVVYTIITPMLNPLIYTLRNSEMKNAMEKTWSG

*LTTCRIRNCIHTENIIANSKARTRQ

>LoafORs21.22

MGHRNNVTEFVLLGLTQDPEVQKVLFVMFLLIYIVTMVGNVLIVMIIIVS

PSLDSPMYFFLAYLSLMDAVYSTAISPKMILDLLCDKKTISFSACMGQLF

IEHLFGGAEVFLLVAMAFDRYVAICKPLYYLTIMNRQVCILLLVVACVGG

FLHSVVQLLFVYSLPFCGRNVIDHFGCDMYPLLELACTDTYFIGLTVVAN

GGAICMVIFILLLISCGVILNSLKTHSQEGRRKALVTCSSHITVVVLFFV

PCIFLYVRPVSNFPIDKSMTVLYTVITPMLNPLIYTLRNSEMKKAMEKIL

SKKLTTGSVKMCAHTENTVANSKAGNRQ*

>LoafORs21.23P

MEQRKNVTEFVLLGLTQSLQGQKILFVVFLLIYIVTIVGHLLIGMTVVVS

PTLDTPVYSFLGHLT/FFFFMDAVYSTAVTPNLIIDLHYEKKTIFFQACL

TQLFAEHLFGGFEVLLLMVMTYDRYVAICKRLHSMTIMNQRVCVLLLLVT

WVGGFLHVILHLLFVYHLPFCGPHVIDHFCCDMCPLLKLACTDIYAIGLT

VIVNDGAIRVVIFMLLLISYGVILHP*GTLVRKGGTK

>LoafORs21.24

MGYSNNVTEFVLLGLTQDPDGQKVLIVMFLFIYIVTMVGNVLIVLTVVVS

PSLGFPMYFFLAYLSLMDAVYSTAVCPKMILDLLCDKKTISFSACMGQLF

IMHLFGGAEIFLLVAMAYDRYVAICKPLHYLTIMNRQVCILLLVVAWVGG

FLHSVIQLLFVHRLPFCGPNVIDHFMCDLYPLLELACSETYFIGLTVVAN

DGAICMVIFILLLVSYGAILKSLKTHSQEGRLKALSTCSSHITVVVLFFV

PCIFMYVRPVSNFPIDKSMTVVYTIITPMLNPLIYTLRNSEMKNAMEKTW

NGKLTTC*

>LoafORs21.25P

MEQWNNVTEFVLLRFTQSVQGQKIFFVVFLLMYIVTMVGNLIFGVTVVVG

PTVDTPMYFFLNYLSLMDAVY/TATPNKIIDLLYEKKTISFQGCLTQLFV

EHLFGGSEVLLLVVMAYDRYLAICRPLHYVMIMNQQVCVLLLLVTWVEGF

VHAIAHLHFVYHLPFSGPNVIDHFCCDMYLLLKLACTNTYVISLTVIADD

GAICVIIFMLLLISYGVIMHSMKNLNQEGMHKALSMCGSHITVVIVFFVP

CIFLYVKPLSTLPIDKFLTVFCTV

>LoafORs21.26P

MGHSNNVTEFVLLGLTQDPEGQKVLFVMFLLIYIVTMVGNLLIVMTVVVS

PSLGSPMYFFLAYLSLMDAVYSTAISPKMILDLLCDKKTISFSACMGQLF

IEHLFGGAEVFLLVAMAYDCYVAICKPLHHLTIMNRQVCILLLVVAWVGG

FLHSVVQLLFVYSLPFCGPKVIDHFSCDMYPLLELACTDTYFIGLTVVAN

GGAICMVIFILLLISCGVILNSLKTHS*EGRRKALSTCSSHITVVVLFFV

PCIFMYVRPLSKFPVDKSHVESSDIHPGNSEMKNAMEKIWSGKLTTGRVR

MSIRTENNIANFEVRNS**MITMN

>LoafORs21.27P

QKILFVVFLLMYIVTMVGNLLIGVTVVVSPTLGAPMYFCLGYLACMDAVF

STAVNPNMILDLLYEKKTISFQDCLTQLSAEHLFGGSEVLLLMVMAYDRS

VAICTPLH*MTIMNQRVHVLLLSMTRVGGL/VHAVLHLLFVYNLPFCGPN

VIDHFCCDMYPLL*LAGTDTYVISLTVVANDGATCVVIFILLFISYGVIM

HSLKNLSLEGRCKALSTCGSNITVVVLFFAPCVFLYVKPLSTLPIDKFLT

VFCTVFTPVLNPLIYTLRNVEMKNAMKN

>LoafORs21.28P

MGYSNNVTEFVLLGLTQDPQGQKVLFVMFLLIYMVTMVGNLLIVMTVIVS

PSLGSPM/APPWALPCYFFLAYLSLMDAVYSTAISPKMVLDLLCDKKTIS

FSACMGQLFIGHLFSGAEIFLLVAMAYDRYVAFCKPLHYLTIMNRQVCVQ

*LVVAWVGGFLHSVVQLLFVYILPFCGPNVIDHFGCDTYPLLELTCTDTC

FIGLIVAANGGAICMVIFILLLISYGVILNSLKTHSQEGRRKALSTCSSH

ITVVLFFCP/FFVPCIFMYVRPVSNFPADKSMTAVYTVITSMLNPLMYTL

RNSEMKNAMEKIWSTKLTT

>LoafORs21.29

MEQVKNVTEFVLLGLTQSLQGQKILFVVFLLIYIVTLMGNLLIVVTVLVS

PSLDAPMYFFLGYLSFMDAVYSTTVTPNMIIDLLYGKKTISFQACLTQLF

VEHLFGGAEILLLVVLAYDRYVAICKPLHHMTIMNQQVRVLLLLVTWVGG

FVHAVAHLLFVYNLPFCGPNVIDHFFCDMYPLLKLACTDIYVIGLTVIAN

DGVICVVIFMLLLFSYGVILHSLKNLSQEGRHKALSTCGSHITVVVLFFV

PCIFLYVRPPFTLPIDKFFAVFYTVFTPMLNPLIYTLRNMEIKNAMKKIW

TRKRN*

>LoafORs21.30

MGQRNNVTEFVLLGLTQSLHGQKIFFVLFLLIYIVTMVGNLLIVMTVVIS

PTLDAPMYFFLGYLSFTDAVYSTTVTPNMIIDLLYEKKIISFRACMTQLF

VGHLFGGAEILLLVVIAYDRYLAICKPLHYTTIMNQKVCVLLLLVAWVGG

FVHAVVQLLFVCNLPFCGPNVIDHFICDMYPLLKLACTDTYIIGLTVVAN

DGVICMVIFMLLLISYGVILHSLKNLSQEGRRKALSTCGSHITVVFLCFV

PCIFMYVRPPSTLSIDKFLTVFYTVITPMLNPLIYTLRNAEMKNAMKKLW

TRKRK*

>LoafORs21.31P

MEQRNNVTEFVLLGLTQSLQGQKILFVAFLLIYIVTVVGNLLIVMTVVIS

PTVDAPMYFFLGYLSFMDAVYFTTVTPNMITDLLYEKKTISFQACLTQLF

VEHLFGGAEILLLVVMAYDRYVAICKPLRYMTIMNQQVRVLLLLVTWVGG

FVHAVAHLLFVYNLPFCGPNVIDHFDCDMYLLLKLACTDTYVIGLTVITN

DGAICVVIFILLLISYGVIMHSLKNLSQEGRHKALST*GSHITVVVLFFV

TCIFLYVRPPFSLSTDKFLAVFYTIFTPMLNSLIYTLRSAEMKNAMKRLW

TRKR

>LoafORs21.32

MDQRNNVTEFVLLGLTQNLQDQKVLFVLFLLIYIVTMVGNILIVVTVVVS

PTLDAPMFFFLGYLSFMDAVYSTTVTPNMITDLLYGKKTFSFQACMTQLF

VGHLFGGVEILLLVVMAYDRYMAICKPLHYMIIMNQSACVLLLLVACVGG

FVHGVVQLLFVYNLPFCGPNVIDHFICDMYPLLKLACTDTYVIGLTVVAS

DGAMCVVIFMLLLNCYGVILHHLKNLSQEERCKALSTCGSHITVVALFFV

PCILMYVRPPSTLPTDKFLTVFCTAITPMLNLLIYTLRNAEMKNAMKKLW

TRKHK*

>LoafORs21.33

MMEPGNNVTYFVLLGLTQNPKEQKVLFVMFLLFYILTMVGNLLIVVTVTF

SKTLDSPMYFFLGSLSFMDVIYSSVISPKLISDLYFGKTTISFQSCMLQL

FGEHFFGGSEVFLLLVMAYDRYVAICKPLHYLVIMRQWVCVVLLIVSWAG

GFLHSIIQLSSLYGLPFCGPNVIDHFFCDMYPLLKLVCTDTYIVGFLVAA

NGGVICTLVFLFLLISYGVILYSLKSLSQEGKQKALSTCGSHITVVVFFF

VPCIFMYTRPAKTFPIDKSLSVFYTVITPMLNPLIYTLRNSEMTTAMKKL

WGKK*

>LoafORs21.34

MMEPGNNVTYFVLLGLTQNPKEQKVLFVMFLLFYILTMMGNLLIVVTVTF

SKTLDSPMYFFLGSLSFMDVIYSSVISPKLISDLFFGKTTISFQSCMIQL

FGEHFFGGSEVFLLLVMAYDRYVAICKPLHYLVIMRQWVCVVLLIVSWAG

GFLHSIIQLSSLYGLPFCGPNVIDHFFCDMYPLLKLVCTDTYVIGFLVAA

NGGVICTLVFLLLLISYGVILYSLKSLSQEGKRKALSTCGSHITVVVCFF

VPCIFMYVRPAKTFPIDKSLSVFYTVITPMLNPLIYTLRNSEMINAMKKL

WGKK*

>LoafORs21.35

MKRMNNVTEFILLGLTENIELQKFSFAVVLIVYLVTLAGNLLIMIMISTN

RSLGSPMYFFLFYLSLIDGCFSSAMTPKMLADSLTVRKTISFGGCMTQIF

AKHLFGAAEIILLTVMAYDHYVAICKPLHYTTIMSHRLCLLLVGVAWAGG

FVHATIQVLFIVWLPFCGPNVLDHFMCDLIPLLELICMGTHILGLFVAAN

SGFICLLNFLLLVVSYVVILHSLRAHSLEGRCKALSTCVSHITVVILFFV

PCIFVYLRPVTTFSIDKAVAVFYTMITPMLNPLIYSLRNTEVKNAMKKLW

GQIVTSTGK*

>LoafORs21.36

MKCMNNVTEFSLLGLTENTELQKLSFAVFLIVYLVTLSGNLLIMITISTN

KSSGSPMYFFLSYLSFIECCSSSSTAPKMLAASLTVRKTISFGGCMTQIF

AEHLFGAAEIILLTVMAYDRYVAICKLLHYMTIMSHRLCILLVRIVWAGG

FIHATIQVLFIVWLPFCGPNILDHLLCDLIPLLELVCMDTHTFGLFVAAN

SGFICLLNFLLLVVSYVVILRSLKAHSLEGRRKALSTCASHITVVFLLFV

PCIFVYLRPVTTFSIDKAVTVFYTMITPMLNPLIYTLRNAEVKNAMKKLW

HQKLTSSEK*

>LoafORs21.37

MENKNNVTEFVLLGLTENPKMQKVAFAVFLVIYTITVVGNVLIGVTITAS

PLLGSPMYFFLAYLSFIDACYSSVNTPKLIVDSLRERKTIPFNGCMTQVF

GEHFIGGAEVILLTVMAYDRYVAICKPLHYTTIMNRRVCGLLIGVSWVGG

FLHAIIQILFIFRLPFCGPNIIDHFMCDLNPLLDLACTDTHILGLFVAAN

SGFICLLNFLLLLASYVVILCSLRTHSLEGRRKALSTCVSHITVVVLFFV

PSIFVYVRPTGTLSVDKAVAVFYTIITPMLNPLIYTFRNAQMKNALVKLC

SRKSISDDKHF*

>LoafORs21.38P

MENKNNVTEFVLLGLTENPKMQKVTFAVFFVIYTITVVGNMLIVVTITAS

PLLGSPMYFFLAYLSFIDACYSSVSTPKLM/RERKTIPFNGCMTQVFGEH

FFGGAEVILLTVMAYDRYVAICKPLHYTTIMNRRVCGLLIGVSWVGGFLH

AIIQILFIFRLPFCGPNIIDHFMCDLNPLLNLACTDTHILGLFVAANSGF

ICLLNFLLLLVSYVVILCSLRTHSLEGRRKALSTCVSHITVVVLFFVPCM

FVYMRPAATLFVDKAVAVFYTIITPILNPLIYTFRNAQMKNALVKLCSRK

SISGDKH

>LoafORs21.39P

FFVIYIITVVGNVLIVVTITASPLLGSPMYFFRGYLSFIDACYSSVSTPK

LIVDSLHERKTISFNGCMTQAFGEHFFGGAEVILLSVMAYDRYVAICKSL

HYTTIMNRRACGVLIAVSWVGGFLHAIIQILFMFRLPFCGSNIIDHFMCD

LNPLLNLACTDTHILGLFVAANSGFICLLNFLLLLVSYVVILCSLRTHSL

EGRRKALSTCVSHITVVVLFFVPCIFVYMRPAATLYIDKAVAVFYATITP

TLNPLIYTFINAQMKSVVVKLCRRTAIPDDKY

>LoafORs21.40

MESRNVTEFVLLGLTENPKMQKIIFTMFSIIYIITVIGNVLIVVTIAASP

SLGSPMYFFLAYLSFIDACYSSVNTPKLIIDSLQERKTILFDGCMTQVFG

EHFFGGAEGILLTVMAYDRYVAICQPLHYTTIVNKRVCGLLVGVVWVGGF

LHATIQILFMFRLPFCGPNIIDHFMCDLNPLLNLACTDTHILGLFVAANS

GFICLLNFILLLVSYVVILCSLRTHSLEGRRKALSTCVSHITVVVLFFVP

CIFVYMRPATTLSVDKAVAVFYTIITPMLNPLIYTLRNAQMKNAIRKLCS

RKAISSN*

>LoafORs21.41

MENNRNVTEFILIGLTQNPKMQKLVFMVFLVLYMVTLSGNLLIVVTITTS

QALSSPMYFFLTHLSLIDTVYSSSSAPKLIVDSLQEKKMISFNGCMAQAY

AEHIFGATEIILLTVMAYDRYVAICKPLHYINIMSHRLCILLVGVAWTGG

FLHATVQILFTVWLPFCGPNIIDHFMCDLYPLLKLVCMDTHTLGLFVAAN

SGFICLLNFLLLMVSYVVILHSLRAHSLEGRHKALSTCVSHITVVILCFV

PCIFVYLRPVTTLPIDKAVAVFYTMMAPMLNPLIYTLRNTEIKTAMRKLW

SKKVISAD*

>LoafORs21.42

MERVNNVTEFILLGLTQNPDVQKLLFAVFAVIYLLALAGNLLIVVTITTS

PVLGSPMYFFLSFLSFIDGCCSSTMAPKMIVDLLAEKKTISFSGCMTQLF

AEHFFGGVEILLLTVMAYDRYVAICKPLHYMITMNRQVCGLLVAVAWAGV

FFHALIQILFMVWLPFCGPNVIDHFICDLFPLLKLSCTDTHTFGLFVAAN

SGMTCMLVFSILITSYVLILCSLRTYSSEGQRKALSTCASHITVVVLFFV

PCIFVHLRPMVTFPIDKAVAVFYTMVTPMLNRLIYTLRNAEVKNAMRKLC

SQREILSKHLCE*

>LoafORs21.43

MGHMSSTQAAVVKRMNNVTEFILLGLTQNPELQKLLFPVFLITYLMTLAG

NLLISVTIFISPALGSPMYFFLSCLSIIDAFYSSSITPKMIFDLISEKNT

ISFNGCMTQLFTEHFFAGTEIILLMAMAYDRYVAICKPLHYTTIMSRPLC

SFLVGMAGILGLIHGGIQLLFMVHLPFCCPNIIDHFICDLIPLLELACTD

THTLGPLIAANSGSVCLFTFSMLVASYVVILHSLRSYSSEGRHKALSTCA

SHVTVVVLFFVPCSFLYLRPMTSFPADKAVTVLFTLVTPMLNPLIYTLRN

AEVKNVMKKLWGQIMKTNN*

>LoafORs21.44P

YGEYIFGATEIILLMEMAYIHYVSICKPLHYMTIMSHRLCILLVGVARTA

GFLHTIIQILITVCLHSCGPNGIDNFIYDL*PLLKLVLMDTHTIGLFVVA

NSGFICLLNFLHLMVSSVVIVHSLRAHSLEGWYKALSTCLSYLMLL

>LoafORs21.45P

MGHRPSTQAALVKRMSNVTEFILLGLTQNPELRKLLFPVFSITYLMTLAG

NLLISVTIFISPALGSPMYFFLSCLSIIDAFYSSSIAPKMIFDLISEKNT

ISFNGCMTQLFAEYLFAAAEIILLMAMAYDRYVAICKPLHYTTLMTRPLC

SSLMGMAGILGFIHGGIQLLFMVHLPFCGPNVIDYFICDLIPLLELACTD

NHTLGPLIAANSGSVCLLSFSMLVSSYIIILHSLRSYSSEGRCKALSTCA

SHVTVVILFFVPCSFLY*DP

>LoafORs21.46

MGRVPSTQAALVKRMSNVTEFILLGLTQNPQLQKLLFPVLSITYLMTLAG

NLLISVTIFISPALGSPMYFFLSFLSIVDSFYSSSITPKMIFDLISEKNT

ISFNGCMTQLFAEYLFAAAEIILLLAMAYDRYVAICKPLHYTTIMTRPLC

SSLVGMAGILGFIHGGIQLLFMVHLPFCGPNVIDHFVCDLIPLLELACTD

NHTLGPLIAANSGSVCLLTFSMLVASYMVILHSLRSYSSEGRRKALSTCA

SHVTVVILFFVPCSFLYLRPMTSFPADKAVTVLFTLVTSMLNPLIYTLRN

VEMKNVMKKLWGQIIKTSD*

>LoafORs21.47P

FT*IGLLWNLKMQKLVSVVFFVLYVVTLSGNLLIFVTISVSQTLSFSMYF

FLTQVSLTDTIYSSSASKLIVDSLHEKKMISFN/MVQV*AEYIFGATEII

LLMEMAYDYYVAICKPLNSMTNMSYRPCILLVGVAWTAGFLHAIIQILFK

VWLPFCGPIVIENFKYDLYTLLKLVCMDTHTLAVFVVANSGFICLLNFLL

LMVSYVVILHSLRARSLKLWSKALST

>LoafORs21.48T

AQLPFCGLNVIDHFMCDLIPLLQLACTDTRTLGPLIAANSGSLCLLIFSV

LVTSYVIILRSLRTYSSEGRSKALSTCASHVTVVVLFFVPCSFLYLRPMT

SFPADKAVTVFCTLVTPMLNPLIYTLRNAEVKNVMKKLWGQILKTRDK*

>LoafORs21.49

MENRNNVTEFVLLGLTDSPKMQKIIFVMFFVIYIIIVVGNVLIVVTITAS

PLLGSPMYFFLAYLSFIDACYSSVSTPKLITDSLHQTKTILFNECMIQVF

GEHFFGGAEIILLTVMAYDRYVAICKPLHYTTIMNRRVCGLLVGVVWVGG

FLHATIQIIFIFQLPFCGPNIIDHFMCDLNPLLSLACTDTHTLGFFVAAN

SGFICLLNFLLLLVSYVVILCSLRTLSLEGRRKALSTCASHITVVVLFFV

PCIFVYMRPAATLSADKAVAVFYTIITPMLNPLIYTLRNAQMRDAIGKLC

SRKAISED*

>LoafORs21.50P

MAPVYV*HVFGITEIILLMKMAYDHYVAICKPWHYVTIVCYRPGIVLVGV

AWNRAFLHVTIQILFTVWLPFCSPNVIDHFMCNLYPLLKLVCMDTHTLGF

FVAANSGFTCVLNFLLLMICYAFILCSLRAHSLEGWSKALSTCFSYLILV

>LoafORs21.51

MGHMPSTQTALVKRMSNVTEFILLGLTQNPQLRKLLFPVVLITYLMTLAG

NLLISVTIFISPALGSPMYFFLSCLSIIDAFYSSSIAPKMIFDLISEKNT

ISFNGCMTQLFVEHLFAGTEIILLLAMAYDRYMAICKPLHYTTIMNRPLC

SFLVGMAGILGFIHGEIQLLFMVHLPFCGPNVIDHFMCDLIPLLELVCID

THTLGPLMAANSGSLCLLTFSMLVTSYVIILHSLKSYSSEGCRKALSTCA

SHVTVVILFFVPCSFLYLRPMTSFPADKAVTVFCTLVTPMLNPLIYTLRN

AEMKNIMKKLWDQKMNTGDR*

>LoafORs21.52P

MTICKSLHYTTIMSQRVCCLLVGVVWVGGFLHATVQILFIFQLPFCDPNI

IDHFMYDLNPLPALI/CTDTHTLRLFVTANRDSSAC*NFCSCWSPCAHLV

LPKTLGLEGRCKVLSTWASHITVVILFSVPCIFMYVRPGTSLFVDKAVAV

FYAIIIAMLNPLTYFEKCR*KNAIRKLYSRK

>LoafORs21.53

MGHIPSTQDALVKRKNNVTEFILLGLTQNPQLQKLLFPVFSITYLMTLAG

NLLISVTIFISPALGSPMYFFLSCLSIIDAFYSSSIAPKMIFDLISEKNT

ISFNGCMTQLFFEHLFAGAEIILLIAMAYDRYVAICKPLHYATIMSRPLC

SFLVGMAGILGFIHGEIQLLFVVQLPFCGPNVIDHFMCDLIPLLELACTD

NHTLGPLITANSGSLCLLSFSMLVTSYVIILHSLRSYSSEGRRKALSTCA

SHVTVVILFFVPCSFLYLRPMTSFPDDKAVTVLFTLVTPMLNPLIYTLRN

AEVKNVMKKLWDQIMKTGDK*

>LoafORs21.54P

SSPMYFFLTQLSLIDTIYSSSSAPQLIMDSLHEKKMISFSGCTAQVYVEH

IFGATEIIPLMVMAYDHYVAICKPLNSMTIMSHRLCILLVGVAWTREYLY

ATIQILFTVWLLFCDPNVIDHFMCDLYPLLKLVCMDTRTLGLFVAANSGF

ICL*NFLHLMVSYVVILHSLRAHCLEGRCKVLSTCVSHITVVI*FFVPCI

FMYLLRMTTLTIE

>LoafORs21.55

MSHMPSTSAALVERMSNVTEFILLGLTQNPKLQKLLLPVFLITYLITVAG

NLLISVTIFISPALGSPVYFFLSCLSIIDSFYASSIAPKMVFDLISEKNT

ISFIGCMIQLFAEHFFGAAEIILLIAIAYDRYMAICKPLNYATIMSRPLC

SFLVGMAGILGFIHGGIQLSLIVQLPFCGPNVIDHFMCDLIPLLEVACMD

THTLGPLIAANSGSLCLLIFSMLVTSYVIILHSLRSYSSEGRRKALSTCA

SHVTVVVLFFVPCSFLYLRPMTSFPTDKAVTVFCTLVTPMLNPLIYTLRN

AEVKNVMKKLWDQIMKNGDK*

>LoafORs21.56

MSAFSVSLGSMEIPHNITEFIMLGLSQNPEVQRVLFMVFLIIYVVTVCGN

ILIVVTITSSSTLASPMYFFLANLSFIDTCYSSCMAPKLIADSLYEGRPI

SYEACMTQLFGAHFLGGTEIILLTVMAYDRYVAICKPLHYTTIMTRHLCA

LLVGVAWLGGFLHSLVQLLLVLQLPFCGLNVINHFVCDLYPLLELTCTNT

YVIGLLVVANSGVICLLNFLMLAASYIVILCSLRSHSAEGRRKALSTCGA

HFIVVALFFVPCIFTYMSPSSTFSIDKNMAVFYGVLTPMLNPLIYTLRNK

EVKRAIRKLFIQ*

>LoafORs21.57

MDSPRNITEFFMVGLSQNPEVQRVLFVLFVIVYLVSIGGNLLILITIIFS

STLGSPMYFFLAYLSFIDTCYSSCMTPKLIADSMYEGRAISFEGCLAQFF

VAHLLGGTEIILLTVMAFDRYVAICKPLHYTTIMTRQLCGLLVGMAWLGG

FLHSLVQLLLVLQLPFCGPNVINHFVCDLYPLLELACTNTYVIGLLVVAN

SGVICLLNFLMLAASYIVILHSLRSHSAEGRRKALSTCGAHFTVVALFFV

PCIFIYMRPSSTLSVDKIVAVFYCILTPMFNPLIYTLRNAEMKNAMMNLW

KQ*

>LoafORs21.58

MGTKNNVTVFVLFGLFQSREMLHACFIVFSLFHVLTLLGNLLVIVTINAS

KTLNAPMYFFLSHLSFADMCYPSTTTPKMIADTFVEHKTISFNGCMTQLF

SAHFFGGTEIFLLPAMAYDRYVAICRPLHYTIIMDRQKCSLLVGASWVSG

FLHSILQTLLTVQLPFCGPNEIDNFFCDVHPLLKLACGDTYLVGLIVVAN

SGMISLVSFLILIISYVVILLNLRSQSTKSRHKALSTCGSHIITVLLVLV

PPMFMYIRPSTTLAADKLVILFNIVMPPLLNPLIYTLRNNEVKNAMRKLF

RVKEYSGK*

>LoafORs21.59

MGTKNNVTEFVLFGLFQSREMQHASFIVFSLFHVLTVLGNLLVIITINAS

NTLNAPMYFFLSHLSFVDMCYPFVTIPKMIADTFMEHKTISFNGCMNQLF

SAHFFGCTEIFLLIAMAYDRYVAICRPLHYTIIMNRQKCSPLVGASWGVS

FLHSILQTLLTVQLPFCGPNEIDNFFCDVHPLLKLACADTYMVGLIVVAN

SGMISLVSFLILIISYVVILLNLRSRSSESRHKALSTCGSHIITVLLVLV

PPMIVYIRPSTTLAADKFIILFNIAIPPMLNPVIYTLRNNEVKNAMRKLF

RVKEYSGK*

>LoafORs21.60P

MAASSND*IFLGLSQNQDVQKIISVVFLLMYTAILLGNGLIVVTIMASKG

LISPIYFFLSYLFFVEICYCSVTAPKLIIDSFTERKVISLKG*LTQIFFL

HFFGGAGIFLLTVVAYDCYVAIRKPLLHTTLKNHRVCGLLVEATWGGGLL

HSAGQTFLIFQLLFCGPNIIDHYSCDVHPVLKLASSDTFLIGLLVIANGG

SISVVSFAVLLAFYVDILHSLRRQSSEGQHKGLSTCASHITVVGLFFIPC

SFVYMRPCVILPVDKLVAVFYTVVTPLLNPIIYSFRNAEVKNSVRRLMGR

KVTWEEK

>LoafORs21.61P

RVLFVLFVIVDLVSVGSNLLYHDHYYFSSTLASSMYFFVA*LSFIDTCCS

SSMTLKLIADSMYKGRAISFEGCLAQLFVAHLLGGTQIFLLTVVAFDQYM

AICKPLHYTTIMTRQLCALLVGMAWLGGFLHSLVQLLLVLQLPFCGPNVI

NHFVCDLYPLLELACSNTYVIGLLVVANSGVICLLNFLMLAASYIVILRS

LRSHSAEGRRKALSICGAHFTVVALFFMPCIFIYMRPSSTLSVDKIVAVF

YCILTPMFNPL

>LoafORs21.62

MGTKNNVTEFVLFGLFQSREMQHASFIVFSLFHVLTVLGNLLVIITINAS

NTLNAPMYFFLSHLSFVDMCYPFVTIPKMIADTFMEHKTISFNGCMNQLF

SAHFFGCTEIFLLIAMAYDRYVAICRPLHYTIVMNRQKCSLLVGASWGVS

FLHSILQTLLTVQLPFCGPNEIDHFLCDVNPLLKLACADTYMVGLIVVAN

SGLISLVSFLILIISYVVILLNLRSRSSKSRHKALSTCGSYIITVLLVLV

PPMIVYIRPSTTLAADKFIILFNIAIPPMLNPVIYTLRNNEVKNAMRKLF

RVKEYSGK*

>LoafORs21.63

MAASSNVTEIIFLGLSQNQDVQKIISVVFLLMYTAILLGNGLIVVTIMAS

KGLISPMYFFLSYLSFVEICYCSVTAPRLIIDSFTERKVISLKGCITQIF

FLHFFGGTEIFLLTVMAYDRYVAICKPLHYTAVMNHRVCGLLVGATWGGG

LLHSAGQTFLIFQLPFCGPNMIDHYFCDVHPVLKLASSDTFLIGLLIIAN

GGSISVVSFAVLLASYMVILHSLRRQTSEGRRKALSTCASHITVVGLFFI

PCSFVYMRPCVTLPVDKLVAVFYTVVTPLLNPIIYSFRNAEVKDAMRRLM

GRKVIWEEK*

>LoafORs21.64

MADTHNVTEFIFLGLSTNPEVQKVCFVIFSFLYTAIVLENFLIVLTVITS

RSLISPMYFFLSYLSFVEICYSSTTAPKLILDLLAERQAISLWDCMTQLF

FIHFFGGTEIFLLTVMAYDRYVAICKPLNYTTIMNQQVCAVLVGIAWVGG

FVHSLAQVLLVFHLPFCGPNVIDHFFCDLLPLLKLACSDTFLIGLLMVAN

GGTLSVISFAVVLASYVVILLHLRTRSSEGRQKALSTCGSHISVAALFFG

PCIFIYLRSSTTLSVDKMVAVFYTAITPLLNPAIYSLRNAEVKKAMKRLW

SKTMKEEER*

>LoafORs21.65P

TVILLLIVMAYDCYMAICKPLHHTTIMCYRVYHLLVAGSWLGDIIHSTVQ

ILVTVQLPFCGPNVIDYYFCDLYLQCTDTFVEGVTVLANSALISVITFLI

LVSSYITILVNLRNYSAEGRCRALCTHASFITVAILFFGPATFLYMRPSS

TFTEDKLVAVFYTCCIP

>LoafORs21.66

MANTHNVTEFVFLGLSTNPEVQRVCFVIFLFLYIATVLGNCLIVLTVMTS

RSLASPMYFFLSYLSFVEICHSSTTAPKLISDLLAERKAIYLWGCITQVF

FIHFFGGTEIFLLTVMAYDRYVAICKPLNYTTIMNQQVCAVLVGIAWVGG

FVHSFAQVLLIFHLPFCGPNVIDHFFCDLLPLLKLACSDTFLIGLLMVAN

GGTLSVISFVVVLASYVVILLHLRIRSSEGRRKALSTCGSHISVVILFFG

PLIFIYMRPSTTLSVDKMVAVFYTVITPLLNPVIYSLRNAEVKKAMKRLW

SKTMKEEER*

>LoafORs21.67P

NYVTELILTSLFQDPKLQRVCFVGFLPVYLATVMGNGLIVLTVSVSKSLH

SPMNFFLSYLSLVKISDSSNFVPKF

>LoafORs21.68P

AYDRYMAICKPLHYTTIMSWPVCHLLVAGSWLGDIIHSMI*ILVTVQLPF

CGPNVVDYYFCDLYLLFKFACTNTFVEGVPVLANTALISVTSFLILVSSY

VIILV*LRNYSAERRCRAFSTHASHITVIILFFGPATFLYLRPSSTFTED

KLVAVFYTVITPMLKPIIYTLRNAVVKNAIRRLWGKKMNSGIE

>LoafORs21.69

MADTHNVTEFIFLGLSTNPEVQRVCFVIFLLLYMAIVLGNFLIVLTVMTS

RSLASPMYFFLSYLSFVEICYSSTTAPKLISDLLVEKKAISLWGCMTQVL

FIHFFGGTEIFLLTVMAYDRYVAICKPLNYTTIMNQQVCAVLVGIAWVGG

FVHSFAQVLLIFHLPFCGPNVIDHYFCDLHPLLKLACSDTFLIGLLMVAN

GGTVSVISFVVVLASYVVILLHLRTRSSEGWRKALSTCGSHISVVILFFG

PLIFIYVRASTTLSVDKMVAVFYTVITPLLNPVIYSLRNAEVKKAMKRLW

IKTMKVDEK*

>LoafORs21.70

MADTHNVTEFIFLGLSPNLEVQRVCFVIFLFLYTAIVLGNFLIVLTVMTS

RSLASPMYFFLSCLSFMEICYSSTTAPKLISDLLAEKKAISLWGCMTQVF

FIHFFGGTEIFLLTVMAYDRYVAICKPLNYTTIMNQQVCAVLVGMASVGS

FVHSFAQVLLIFHLPFYGPSVIDHFFCDLLPLLKLACSDTFLIGLLMVAN

GGTLSVISFVVVLASYVVILLHLRTRSSEGRRKALSTCGSHITVVILFFG

PCIFIYLRPSTTLSVDKMVAVFYTVITPLLNPIIYSLRNAEVRKAMKRLW

IRAINVDEK*

>LoafORs21.71

MGSMTSKNNVTELIITGLFQDPQVQRVCFVVFLLLYLATVVCNGLIVLTV

SVSKSLRSPMYFFLSYLSLVEISYSSTVVPKFITDLLIKIKTISLEGCLA

QIFFFHFFGVTEILLLTVMAYDRYGAICKPLHYTTIMNQAVCHLLVAGCW

LGGIIHSMVQILVTVQLPFCGPNVIDHYFCDLHPLFKVACTDTFVEGAIV

LANSGLISVISFLILVSSYVVILVNLRNHSAEGRRKALSTCASHITVAIL

FFGPAIFLYMRPSSTFTEDKLVAVFYTVITPMLNAIIYTLRNAEVKNAMR

RLWDKKVNSGIE*

>LoafORs21.72

MELMASTNNVTELILTGLFQDPEVQRVCFVVFLSVYLATVVGNGLIVLTV

SVSKSLQSPMYFFLSYLSLVEISYSSTVVPKFITDLMTKIKTISLKGCLA

QIFFFHFLGVTETVLLVVMAYDRYVAICKPLHYMNIMNRQLCHVLVAGSW

LGGFLHSIIQVLITIQSPFCGPNVIDHYLCDLQPLFKLACTDTFVVGVIV

LANSGLISLCSLVILVSSYIVILVNLRNHSAEGRHKALSTCASHITVVVL

FFGPATFLYLWPSSTFTADKLVAVFYTVITPMLNPIIYTLRNAEVKFAVR

RLWGKKKNPVVERKWASDK*

>LoafORs21.73

MQLMASTNNVTELILTGLFQDPEVQRVCFVVFLPVYLATVVGNGLIVLTV

SVSKSLHSPMYFFLSYLSLVEISYSSTVVPKFITDLMTKIKTISLKGCLA

QIFFFHFLGVTETVLLVVMAYDRYVAICKPLHYMKIMSRRLCHVLVAGSW

LGGFLHSIIQVLITIQLPFCGPNIIDHYFCDLQPLFKLACTDTFVEGVSV

LANSGLIALCSFFILVSSYIVILVNLRNHSAEGRRKALSTCASHITVVVL

FFGPATFLYLRPSSTFTEDKLVAVFYTVITPMLNPIIYTLRNAEVKVAMR

KLWGKKKNSVVERKWECNK*

>LoafORs21.74

MELTAGTNNVTELILTGLFQDPEVQRVCFVVFLPMYLATVVGNGFIVLTV

SVSKSLHSPMYFFLCYLSLVEISYSSTVVPKFITDLMTKIKTISLKGCLA

QIFFFHFLGVTETVLLVVMAYDRYVAICKPLHYVNIMNRQLCHVLVAGSW

LGGFLHSIIQILITIQLPFCGPNVIDHYFCDLQPLFKLACTDTYVEGVTV

LANRGLLSLCSFLILVSSYIVILVNLRNYSAEGRLKAFSTCASHITVLIL

FFGPATFLYMHPSSTFTADKLVAVFYTVITPMLNPIIYTLRNAEVKFAMR

RLWGKKKNPVVERKWECNK*

>LoafORs21.75

MAGTNNVTELILTGLFQDPEVQRACFVVFLPVYLATVVGNGLIVLTVSIS

KSLHSPMYFFLSYLSVVEISYSSTVVPKFITDLMTKIKAISLKGCLAQIF

FFHFFGVAEILLLVVMAYDRYVAICKPLHYMKIMSRGLCHVLVAGSWLGG

FLHSIIQVLITIQLPFCGPNIIDHYFCDLQPLFKLACTDTFVEGVSVLAN

SGLIALCSFFILVSSYIVILVNLRNHSAEGRRKALSTCASHITVVILFFG

PAIFLYMRPSSTFTEDKLVAVFYTVITPMLNPIIYTLRNAEVKVAMRRLW

GKKNSVVV*

>LoafORs21.76

MCPNLIVFYIFSPTGKVTLCFSLVNCPDSMENNVTEFILTGLSQNEDVQQ

LCFFLFLLCYIILMTGNFLIIITIQRSPNLNSPMYFFLSFLSFVDICYSS

VTAPKLIIDFQAKVKNISFVGCMIQLFCVHLFGCTEIFTLTVMAYDRYVA

ICKPLLYTTIMDWKVCSMLVVTCWLGGFVHSFIQTILTVQLPFCGPNLID

HYFCDVHPLLKLACADTYVVGLIVVANSGMISLSSFVILVGSYTIILLSF

KTHSSEGRRKALSTCASHITVVILLFIPCIFIYLRPSTTFTEDKMVAVFY

TIITPMLNPLIYTLRNMEVKNAMKRLWIKKSLGKNRKNPDVKTDGTGAAS

TVRVSKSVAGNKSVHVP*

>LoafORs21.77

MKRQNQSSVVEFILLGFSNFPELQEQLFGIFLVIYLVTLIGNATIIVVIS

LDQSLHVPMYLFLQNLSVVEVSFSGVIMPEMLVVLSTEKATISSAGCFAQ

MYFILLFGGTECFLLGAMAYDRYVAICHPLSYPLIMNKMVFTKLVMFSWI

SGVMVATVQTTWVFSFHYCGPNKINHLFCETPPVLELACADTFLFEIYAF

TGTILIVVVPFLLILLSYIRILFAILKMPSTTGRQKAFSTCASHLISVTF

FYGTANMTYLQPKSSYSPETKKLMSLAYTLLTPLLNPLIYSLRNNEMKRA

LMKLWQRKVVSHIV*

>LoafORs21.78

MKRQNQSSVVEFILLGFSNFPELQEQLFGIFLVIYLVTLIGNATIIVVVS

LDQSLHVPMYLFLQNLSVVEVSFSGVIMPEMLVVLSTEKATISSAGCFAQ

MYFILLFGGTECFLLGAMAYDRYVAICHPLSYPMIMNKRVFMKLAISSWA

LGFVVATLQTSWVFSFPFCGPNEINHLSCETPPVLELACADTFLFEMYAF

TGTILIVVVPFLLILLSYIRILFAILKMPSSTGRQKAFSTCASHLTSVTL

FYGTANMTYLQPKASYSPETKKLMSLAYSMLTPLLNPLIYSLRNTEMKRA

LMKLWQRKMVLHIV*

>LoafORs21.79

MKRQNQSSVVEFILLGFSNFPELQEQLFGIFLVIYLVTLIGNATIIVVIS

LDQSLHVPMYLFLQNLSVVEVSFSGVIMPEMLVVLSTEKATISFAGCFAQ

MYFILLFGGTECILLGAMAYDRYAAICHPLSYRMIMNKRVFMKLVTSSWA

LGFSMTTIQTPWVFSFPFCGPNEINHLSCETPPVLELVCADTFLFEIYAF

TGTVLIILVPFLLILLSYIRILFAILKMPSTTGRQKAFSTCASHLTSVTL

FYGTAIMTYLQPKSSYSPETKKLMSLSYSLLSPLLNPLIYSLRNSEMKRA

FMKLWRRKVVAHTV*

>LoafORs21.80

MKRQNQSSVVEFILLGFSKFPELQEQLFGIFLVIYLVTLIGNATIIVVIS

LDQSLHVPMYLFLQNLSVVEVSFSGVIMPEMLVVLSTEKATISFAGCFAQ

MYFILLFGGTECILLGATAYDRYAAICHPLSYPMIMNKRVFMKLVTFSWA

LGFSMTTLQTPWVFSFPFCGPNEINHLSCETPPVLELVCADTFLFEIYAF

TGTVLIILVPFLLILLSYIRILFAILKMPSTTGRQKAFSTCASHLTSVTL

FYGTAIMTYLQPKSSYSPETKKLMSLSYSLLTPLLNPLIYSLRNSEMKRA

FMKLWRRKVVAHTL*

>LoafORs21.81

MARGNRTTVTEFVLMGFTDRPELQLPLFVIFLVIYLITLVGNFGMILLIK

VDSWLHTPMYYFLSHLAFIDLCFSSSIGPKMLQNLMVKKKTISFSGCFAQ

LYFSSALATTECFLLATMAYDRYMAICNPLIYTAIMTQRVCRELVIGVYT

YGFLNSVIQTVLTFQLSFCDSNIIHHFYCADPPLLALSCSDTHNKEEQLL

IFSAVNLTGSLLTVLISYTCILFSITKIQSSEGKCKAFSTCASHLTVVII

FYGTLFFMYLRQPITGNSWKYNKVVSVFYSLVIPMLNPLIYSLRNTEVKD

TLKKMLDSKES*

>LoafORs21.82P

LIRGSPQLHTPMYLFLCHLAFVDMGYSSSVTPAMLMGFLREETSLPVAGC

VAQLCSAVMLGTTECFLLAAMAYDRYVAICSPLHYSTYMSPRMCILFLGT

SYLGGCVNAWIFIGCLLSLSFCGPNKINHFFCDYSPP*KLSCSYDFTFDI

IPAVSSGSVIVVTVFVIAVSYIYILITILKMHST*GRHKAFSTWHPPTLT

AVTLFFWTITF/MMPKSSYSTDQNKVVSVFYTVVIPMLNPLIYSLRNKEV

KEAMRKLVARTHWW

>LoafORs21.83P

YKGL*ICSS*LTVVFIHYGFACFVYLKSKNNDSLLDDVLIAVTNTVLTPL

FSPIVYSLRNKEMQIVLRKVVGNANRFFS

>LoafORs21.84P

GNH*AVTTFLLLEFSSFSHP*VLLFVVIFLSLVTFYCKCVHNGGHHAQPQ

PSYPDLLLPLHPVLFKNPCNHPLNVDGLAIS*QMLSLPECATRMFAFFGL

GANNCFIMAAAAYECYIAIQDPLHYPILRT/KICFQLIIASSVVGFLVSL

CILSIVFNLAFYDSKIIQHFFCDISLVTALGCDCTFIHELVI

>LoafORs21.85P

MATGNCTTVTEFIILGLTEDPTVCVILFVVFLGVYVVTVMGNISIITLIR

GSPQLHTPMYLFLCHLAFVDMGYSSSVTPVMLIGFLREETSLPIAGCVAQ

LCSVVMFXXXXXXXXXXXXXXXXXXXXXXXXXXXXXXXXXXAYDRYVAIC

SPLLYSTHMSPRLCIFLVAISYLGGCVNSWIFTGCLLSLSFCGPNKVNHF

FCDYSPLLKLSCSHDFTSDLIPAISSGSIIVVTVFVIAISYVCILITILK

MPSTEGRHKAFITCTSHLTAVTLFFGTITFIYVMPKSSYSTDQNKVVSVF

YMVVIPMLNPLIYSLRNKDVKEAMRKLMTRTNWWS

>LoafORs21.86P

NIAIMVAIMLSHKPLHPDILLPLHPVLFRNP*NHPLNVDGLAISQTDTFP

ECVTWIFAFFGL*GNNFFIMAATSYDCYIAIQDPLHYPILRT/KICFQLI

MASSVVGFLVSLCILSIVFNLTFYDSKIIQHFFCDISLVISLCGDRTFIH

ELVI

>LoafORs21.87

MATGNCTTVTEFIILGLTEDPTVCVILFVVFLGVYVVTVMGNISIITLIR

GSPQLHTPMYLFLCHLAFVDMGYSSSVTPVMLIGFLREETSLPLAGCVTQ

LCSAVMFGTTESFLLASMAYDRYVAICSPLLYSTHISPRICILLVATSYL

GGCVNGWIFTGCLLGLSFCGPNKVNHFFCDYSPLLELSCSHDFTSDIIPA

ISSGSIIVVTVFVIAISYVYILITILKMRSTEGRHKAFSTCTSHLTGVTL

FFGTITFIYVMPKSSYSTDQNKVVSVFYMVVIPMLNPLIYSLRNKDVKEA

MRKLMARTHWWS*

>LoafORs21.88P

FFSPL*HSTANVSIMVAIRLSHNLNILICFFLCILSFLETLAIIP*MLMA

LPLVNQRLSFPECATRMFAFFGLGGNNCFVLASTTFDCYTAIQNPLHYYP

ILMT*KFASRWIMASFVVGFLVSLCIVPIVFNLTFCDFKIIQYVFCDISP

VASFGCDCTFIHEMVIF

>LoafORs21.89

MATGNYTTVTEFIILGLTEDPIVCFILFVVFLGVYVVTVMGNISIITLTR

SSPQLHTPMYLFLCHLAFVDMGYSSSVTPVMLMGFLREETSLPIAGCVAQ

LCSAVIFGTTESFLLAAMAYDRYVAICSPLLYSTHMSPRICMFLLGTSYL

GGCVNGWIFTGCLLSLSFCGPNKVNHFFCDYSPLLKLSCSHDFNSDIIPA

ISSGSVIVVTVFVIAVSYIYILITILKMHSTEGRHKAFSTCTSHLTAVTL

FFGTVTFIYVMPKSSYSTDQNKVVSVFYMVVIPMLNPLIYSLRNKDVKEA

MRKLMARTHWWS*

>LoafORs21.90P

SYLTVVSLHYGFAC*VFLKPKNNNSLLEDIPMAVTYTVLTPLLSPVAYSQ

RNKEMQIALRKVLGNANRF

>LoafORs21.91P

VGNHKAVTTFLLLGFSSFPDL*VLFFIVIFLSLVTQKPNDILLQMWSIMV

AIRLSHKPSHP/SLHTLIYFFLCILSFSETLEIIP*MWMDLPLVKQTLSL

PECATWLFAFFWLERQ*LFHLGSRIL*LLYCHPRPTALSHLNDLKICFHL

IMAPSVVGFLVSVCIISIVFSLAFYDSKITQHFFCDISLVISLGCDCPFI

HAMVILCSVPLC*WTALTVISRIFIIPIVVKMPSAKGRYR*FLTYDRFLF

RQLHQKLVLT*VQYLFFFFSFLYYFP

>LoafORs21.92

MATGNYTTMTEFIILGLTDDPTVCALLFVVFIGIYVVTIMGNISIIMLIR

GSPQLHIPMYLFLCHLAFVDMGYSSSVTPVMLIGFLREETSLPVAGCVAQ

LCSVVTFGTTECFLLAAMACDRYVAICSPLLYSTHMSPRICILLVGISYL

GGCVNGWIFTGCLLSLSFCGPNKVNHFFCDYSPLLKLSCSHDFTSDVIPT

ISSGSIIVVTVFVIAISYIYILITILKMPSTQGRHKAFSTCTSHLTAVTL

FFGTITFIYVMPKSSYSTEQNKVVSMFYTVVIPMLNPLIYSLRNKDVKEA

MRKLMAGTHWWS*

>LoafORs21.93

MATGNYTAVTEFIILGLTEDPTVCVILFIMFLGVYVVTVTGNISIIMLIR

GSPQLHTPMYLFLCYLAFVDIGYSSSVTPVMLMGFLREETSLPVAGCVAQ

LCSVVTFGTTESFLLASMAYDRYVAICSPLLYSTHMSPRICIFLLGTSYL

GGCMNGWIFTGCLLSLSFCGPNKVNHFFCDYSPLLKLSCSHDFTSDIIPA

ISSGSIIVVTVFIIAVSYIYILITILKMRSTEGRHKAFSTCTSHLTAVTL

FFGTITFIYVMPQSSYSTEQNKVVSVFYTVVIPMLNPLIYSLRNKDVKEA

MRKLMARTHWWS*

>LoafORs21.94

MATGNYTTVTEFIILGLTEDPTVCIILFIVFLGVYVVTVMGNISIIMLIR

GSPQLHNPMYFFLCHLASVDIGYSSSVTPVMLMGFLREEISLPVAGCVAQ

LCSVVTFGTTECFLLAAMAYDRYVAICSPLLYSTHMSPRICIFLLGTSYL

GGCVNGWIFTGCLLSLSFCGPNKVNHFFCDYSPLLKLSCSHDFTSDIIPA

ISSGSIIVVTVFVIAVSYVYILITILKMHSIEGRHKAFSTCTSHLTAVTL

FFGTIAFIYVMPQPSSSTDQNKVVSVFYTVVTSMLNPLIYSLRNKEVKEA

MRKLMARTHWWS*

>LoafORs21.95P

ANVSIMVAIRLSHNLHTWMYFFFCILSFSETLAIIT*ILVDLPLVNQMIF

LPECTTWMFLFCGLGGNSCFIMAATPYDSYTAIQNPLHHPILM

>LoafORs21.96

MGNHTTMNTFLLWGFSSFPDLQQLLFVVVFFSHVTILAANVSIMVAIKRS

HNLHTPMYFFLYGLSLSETCTSMVIIPRMLVDLQSETKMISLPECATQMF

FFFGLGTNNCFILAAMSYDRYSAIHHPLHYSILMTPKICFQMMMASFVVG

ILVSLCVVSIVFTLSFCDSKTIRHFFCDITPVVSLACDYTFLQKMILLAF

SPFVLVGSFILIMISYVLILSIVVKMTSAKGRYKAFSTCSSHLTVVSIHY

GFACFSYLRPKNNDSFNEDTLMALTYTVLTPLLNPIVYSLRNKAMQIALR

KVVGNAKSFIT*

>LoafORs21.97

MDNHTAVTTFLLWGFSSFPELQGLLFVIIFFSHVTILAANVSIMVAIKLS

HNLHTPMYFFLCCLSFSETCAAMVIIPRMLVDLLSDSKTIFLPECATQMF

FFFGLAANNCFIMAAMSYDRYTAIHNPLNYHMLITHSICCQLMMASFVVG

FLVSLCIVITVFNLSFCDSKIIQHFFCDISPVVCLACDYTFIHEMFIFVL

SVFVLVGSFILIMVSYVFIVSIVVKMPSAKGRYKAFSTCSSHLTVVSIHY

GFASFVYLKPKNSGSFGEDMLMAVTYTVLTPLLNPIIYSLKNKEMQLALR

KVIGNANKFILLLQKGN*

>LoafORs21.98P

MDSLVDGNHTAVTEFILLGLTEDPTLQVVLFMVILCIYLVTISGNLSIII

LIRISSQLHHPMYFFLSHLALTDIGYSSSVTP/PNMLVNFLVEENTISYL

GCGIQLGSAAFFGPLECFLLAAMAHDRFVAICNPLLYSTKMSTQVCDQLF

SVAYVGGFLNASSFMISIFSLFFCGPNQVNHFFCDFAPLVKLSCSDVSIP

AVVPSFSAGSIIVVTVFVIATSYIYILITILKMHSTEGRRKAFSTCTSHL

TAVTLFYGTITFIYVMPKSSYSTDQGKVVSVFYMVVIPMLNPLIYSLRNN

EIKAAVKRQIGRKIFS

>LoafORs21.99

MDSLADGNHTAVTEFILLGLTEDPTLQVVLFMVILCIYLVTISGNLSTII

LIRISSQLHHPMYFFLSHLALADIGLSSSVTPNMLVNFLVKKNTISYLGC

GIQFGSAAFFGPIECCLLAAMAYDRFVAICNPLLYSTKMSTQVCDQLLSV

SYLGGFLNVSSFTISFLSLFFCGPNRINHFFCDFAPLVKLSCSDVSIPAV

VLSYSAGSILMVTVFVIATSYIYILITILKMHSTEGRHKAFSTCTSHLIA

VTLYYGTVTFIYVMPKSSYSTDQNKVVSVFYMVVIPMLNPLIYSLRNNEI

KAALRRQLGRKIFS*

>LoafORs21.100

MDSLVDGNHTAVTGFILLGLTEDPTLRVILFTVILCIYLVTIYGNLSTII

LIRISSQLHHPMYFFLSHLALTDIGLSSSVTPNTLISFLVEENTISYLGC

GIQHGSAAFFGTVEFFLLAAMAYDRFVAICTPLLYSTKMSTQVCDQLFSV

AYVGGFLNASSFTISFFSLFFCGPKRVNHFFCDFAPLVELSCSDVSIPAL

VPSFSAGSIITITLFIIAASYVYILITILKMPSTQGRHKAFSTCTSHLTA

VTLYYGTVTFIYVMPKSSYSTDQNKLVSVLYTVVIPMLNPLIYSLRNNEI

KAALRRQLGRKIFS*

>LoafORs21.101

MDSLVDGNHTAVTEFILLGLTEDPTLRVILFMVILCIYLVTISGNLSTII

LIRISPQLHHPMYVFLSHLALTDMALSTSVTPNMLVNFLVETNTISYLGC

AIQLGSAAFFGTVECFLLAAMAYDRFVAIRSPLLYSTKMSMRVCDQLFSV

VYVGSFVNASSFTISFFSLFFCGPNQVNHFFCDFVPLVKLSCSDVSIPAV

VPSFSAGSIIVVTVFVLAVSYVCILIAILKMRSTEGRQKAFSTCTSHLTA

VTLYYGTTTFIYVMPKSSYSTDQNKVVSVFYMVVIPMLNPLIYSLSNNEI

KAALKRQLGRKIFS*

>LoafORs21.102P

MDSLVDGNHTAVTEFILLGLKEDPTLRVILFMVILCIYLVTISGNLSTII

LIRISSQLHRPVYGLLSHLAFSDIGCSSSVTPNMLVNFLVETYKISYLGG

ASSLVQLFSLG/VHLFSVAHVCGFLNTCCTICFDSLYFCGPNWVNHFFCD

FGPLVELSCSDASIPAAVASFFIIVVTLFVIATSYVYILITILKMCSTEG

HHKASSTCTSHLIAVTLFYGTITFIYVMPKSSYSTDQNKVVFVFYKVVIP

MLNPLIYSLRNNEIKAAFKRQLGRKIF

>LoafORs21.103

MDSLVHGNHTAVTEFILLGLTKDPTLRVTLFTVILGIYLVTISGNLSTII

LIRISSQLHHPMYVFLSHLALADIGFSSSVTPNMLVNFLVERNTISYIGC

AIQLGSVAFFGTVDCCLLAAMAYDRFVAICNPLLYSTKMSMQVCDQLFSV

AYVGSFLNASSFTISFFSLFFCGPNGVNHFFCDFAPLVELCCSNFSIPAV

APSFFAGSIIVVTVIVIGVSDIQILITILKMRSTEGRHKAFSTCTCHLTA

VTLFYGTTTFIYVMPKSSYSADQNKVVSVFYTVVIPMLNPLIYSLRNNEI

KAALKRQLGRKIFS*

>LoafORs21.104

MDFLVDGNHTAVTEFILLGLTEDPTLRVVLFMVILCIYLVTISGNLSTII

LIRISSQLHRPMYFFLSHLALADIGYSSSVTPNMLVNFIVEKNTISYLGC

GIQLGSAVFFGSVDCCLLAAMAYDRFVAICSPLLYSTKMSTRVCDQLLSV

AYVGGFLDASSFTISFFSLFFCGPNCVNHFFCDFAPLVELSCSDVSIPAV

LPSFSAGSIIVVTVIVIAVSYIYILITILKMHSTEGRHKAFSTCTSHLTA

VTLFYGTVTFTHVMPKSSYSTDQNKVVSVFYMVLIPMLNPLIYSLRSNEI

KAALKQQLGRKIFS*

>LoafORs21.105

MDSLVDGNHTAVTEFILLGLTEDPTLRVTLFMVILCIYLVTISGNLSTII

LIRISSQLHRPMYFFLSHLALTDIGFSSSVTPNMLVNFLVEKNTISYIGC

AIQLGSAAFFGPLECFLLAAMAYDRFVAICSPLLYSTKMSTQVCDQLFSV

AYLGSFLNASSFMISFFSLFFCGANQVNHFFCDFAPLVELSCSDVSIPAV

VPSFSAGSIIVVTVTVRAISYVYILFTILKMRSTEGCHKAFSTCTSHLTA

VTLFYGTITFIYVMPKSSYSTDQNKVVSVFYTVVIPMLNPLIYSLKNNEI

KASLKRQLGRKIFS*

>LoafORs21.106

MDSLVDVNHTAVTEFILLGLTEDPALPVALFMVILCIYLVTISGNLSTII

LIRISSQLHHPMYFFLSHLAFSDIGYSSSVTPNMLINFLVERHTISYLGC

ATQLGSVVFFGSAECCLLAAMAYDRFVAICNPLLYLTKMSTQVCVQLFSM

AYGCAFLNTCCCTICFDSLYFCGPNQVNHFFCDFAPLVELSCSDVSIPAV

VSSFSAGSIFVVTVFVIAISYTYILITILKMHSTEGRHEAFSTCTSHLTA

VTLFYGTTTFIYVMPKSSYSTDQNKVVSVFYMVVIPMLNPLIYSLRNNEI

KGVLKRQLGRKIFP*

>LoafORs21.107

MDSLVDGNHTAVTGFILLGLTEHPTLRVILFTVILCIYLVTISGNLSTII

LIRISSQLHHPMYFFLSHLALTDIGFSSSVTPNMLVNFLVETNTISYTGC

LIQLGSAAFFGPLECFLLAAMAYDRFVAICNPLLYSTKMSTQVCDQLFSV

AYVGSFLNASALTISFFSLFFCGPNRVNHFFCDFAPLVELSCSDVTIPAV

APSFFAGSIVVATVIVIAVSYVYILITILKMHSTDGRHKAFSTCTSHLTA

VTLYYGTTTFIYVMPKSSYSTDQNKVVSVFYMVVIPMLNPLIYSLRNNEI

KATLKRQLGRKIFP*

>LoafORs21.108

MDSLVHGNHTAVTEFILLGLTEDPTLRVTLFMVILCIYLVTICGNLSTII

LIRISSQLHRPMYFFLSHLALADIGYSSSVTPNMLVNFLVETNTISYLGC

GIQLGLAAFFGPVECCLLAAMAYDRFVAICNPLLYSTKMSIQVCDQLLSV

AYVGGFLDASSFTISFFSLFFCGPNRVDHFFCDFAPLVKLSCSDVSIPAV

VPSFSAGSIIVVTVIVIAISYVYILITILKMRSTEGCHKAFSTCTSHLTA

VTLFYGTITFIYVIPKSSYSTDQNKVVSVFYMVLIPMLNPLIYSLRNNEI

KAALKQQLGRKIFS*

>LoafORs21.109

MDSLVNGNHTAVTGFILLGLTEDPTLRVVLFMVILCIYLVTICGNLSTII

LIRISSQLHHPMYFFLSHLALTDIGFSSSVTPNMLINFLVETNTISYTGC

AIQLGSAAFFGTVDCCLLAAMAYDRFVAICNPLLYSAKMSMQFCDHLFSV

AYVGSFLNACSITISFFSLFFCGPNQVNHFFCDFAPLVELSCSDVSIPAV

VPSFSSGSIIVVTVFIIAISYVYILITILKMRSTQGHHKAFSTCTSHLTA

VTLFYGTITFIYVMPKSSYSTDQNKVVSVFYMVVIPMLNPLIYSLRNNEI

KGALKRQLGRKIFP*

>LoafORs21.110T

MDSLVDGNHTAVTEFILLGLTEDPTLRVILFTVILCIYLVTLSGNLSTII

LIRISSQLHRPMYFFLSHLAFTEIGYSSSVTPNMLVNFLVERNTISHLGC

GIQLGSVAFFGTVDCCLLAAMAYDRFVAICNPLLYSTKMSMQV

>LoafORs21.111T

FSTCTSHLTAVTLFYGTTTFIYVMSKSSYSTDQNKVVSVFYMVVIPMLNP

LIYSLRNNEIKAALKKQLGRKVFS*

>LoafORs21.112P

MDSLVDGNHTAVTGFILLGLTEDPTLRVVLFMVIPCIYPVTISGNLSTII

LIRISPQLHCPMYFFLSHLALTDIGYSSSVTPSMLVNFLLETNTISYLGC

AMQLGSAAFFGTVECFLLAAMAYDRFVAICNPLLYSTKLSTQVCDQLFSV

VYVGAFLNASSFTISFFSLFFCGPNRVNHFFCDFAPLVELSCSDVSIPAV

VASYSVGFIIVVTVIVIAVSYVYILITIMKMHSTEGRHKAFSTCTSHLTA

VTLFYGTTTFIYVMPKSTYSTDQNKVVSVFYMVVI

>LoafORs21.113P

MDSLVDGNHTAVTEFILLGLTEDPTLRVTLFMVIQCIYLVTICGNLSTII

LIRISPQLHHPMYLFLSHLALTDIGYSSSVKPSMLVNFLVEKNTISYLGC

GIQLGSAAFFGPLGCFLLAAMAYDCFVAICNPLLYSTKMSTKVCEQLLSV

AYVGGFFDASSFTISFFSLFFCGPN*VNHFFRDFAPLVELMSVSLQWP/T

DVSIPAVAPSFFAGSIIVVTVLVIAISYVYILITILKMHSTEGRHKAFST

CTSHLTTVTLFYGTITFIYV

>LoafORs21.114

MDTLVDGNHTAVTEFILLGLTQDPTVRVTLFMVILCIYLVTISGNLSTII

LIRISPQLHRPMYFFLSHLAFTDIGFSSSVTPNMLVNFLVERNKISYLGC

AIQLGSGAFFGTVECFLLAAMAYDRFAAICNPLLSSTKMSMHVCDQFFSV

AYVGSFLNASSFTISFFSLFFCGPNQVNHFSCDFAPLVELSCSDVSIPAV

VTSFSAGSIIVITVFIIAISYTYILITVMKMRSTEGRHKAFSTCTSHLTA

VTLYYGTTTFIYVMPKSSYSTDQNKVLSLFYTVAIPMLNPLIYTLRNNEI

KGALKRQLGRKIFS*

>LoafORs21.115T

MDSLVVGNHTAVTGFILLGLTQDPTLRAILFMVILCIYLVTISGNLSTII

LIRISSQLHHPMYFFLSHLALADIGFSSSVTPNMLVNVIMERNTISYLGC

WIQHGSAAFFGPLECFLLAAMAYDRFVAICNPQFFSTKMSTEVCVQLFSV

AYVGGFLNASSFTISFLSLFFCEPNRVNHFFYDFPPLVELSCSDVIIPAV

VPSFSAGSIIVSQ*SS*LS

>LoafORs21.116P

CTSHLTAVTLYYGTITFIYVMPKSSYSTDQNKVVSVLYVVVIPTLNPLIY

SLRNNDIKAALKRQLHRKVFS

>LoafORs21.117P

MDSLVVGNHTAVTGFILLGLTEDPTLRVALFMVILCIYLVTISGNLSTII

LIRISSQLHHPMYVFLSHLALADIGLSSSVTPNMLVNFLVETNTISYLGC

AIQLGSGAFFGPIECFLLAAMACDRFVAICNPLLYSTKMS/KCPTLVCDQ

L*SVSYLGGFLNASSFTIFFFSLFFCGPNQVNHFFCDFAPLVKLSCSDVS

IPAVVLSFSAGSIIVVTVFVIAISYVYILITILKMHSTEGRHKAFSTCTS

HLTAVTLYYGTITFIYVMPKSSYSTDQNKVVSVFYMVVIPVLNPLIYSLR

NNEMKAALKRQLGRKIIS

>LoafORs21.118P

DSLVDGNYTAVTEFILMGLTEDPTLRVTLFMVILCIYLVTISGNLSTIIL

IRISPQLHHPMYFFLSHLALTDIGFSSSVTPNMLVNFLVETNKISYLGCA

IQLGSRAFFGTVECFLLATMAYDSFAAICNPLLYSTK/KMSMQVHEQLFS

VAYVGSFVNASSFTISFFSLFFCGPNQVNHFFCDFVPLVKLSCSDVSIPA

VVPSFSAGSIIVVTVFVIAIAYIYILITIVKMRSTEGRHKAFSTCTSHLI

AVTLYYGTITFIYVMPKSSYSTDQNKVVSVFYMVVIP

>LoafORs21.119P

MDSLVDGNHTAVTEFILLGLTEDPTLRVTLFMLILCIYLVTISGNLSTII

LTRISSQLHHPMYVLLSHLAFSDIGYSSSVMPDMLVNFFVERYTISYLGW

ATQLGSVCFLWVS*VLSSGCHGL*SLCRNLQPTALFN*NVHISLCPAILC

GLCMWFSQYLLLYYFLSLYFCGPNQVNHIFCDFAPLVELSCSDVSIPAV/

SIIVVTQFIIATSYVYILITILKMPSTQGCHKDFSTCTSHLTAVTL*YGT

ITFIYVMPKSSYSADQNKVVSVLYMVVIPTMNALIYSLRNNEIKAALRKQ

LGRKIF

>LoafORs21.120P

MDSLVDGNHTAVTGFILLGLTEDPTLQVILFMIILCIYLVTISGNLSTII

LIRISSHLHHPMYFFLSHLALTDIGFSSSVTPNMLVNFLVETNTISYTGC

VIQLGSAAFFGPLESFLLAAMAYDRFVAICTPLLYSTKMSTQVCDQLFSV

AYVGSFLNASSFTISFFSLFFCGPNRVNHFFCDFAPLVELSCSDVSIPAV

APSFSAGSIIVVTVFVIAISYVYILITILKMHSTEGRNKAFSTCTPTHCS

HSVYGTLH

>LoafORs21.121T

MDFLVDGNHTAVIEFILLGLTEDPTLRVTLFMIILCVYLVTISGNLSTII

LIRISSQLHHPMYFFLSHLALADIGYSSSVTPNMLTNFLVETNTISYLGC

GIQLGSAVFFGSAECCLLAAMAYDRFVAICSPLLYSTKMSTQVCDQLLSV

AYIGGFLDASFLYNSFFSLILLWT*S

>LoafORs21.122

MREFILLGFTEDPTLRVVLFMVILCIYLVTISGNLSTIILIRISSQLHHP

MYFSLSHLDLTDIGFSSSVTTNMLVNFLAKRNTISCLGCGIQLGSAAFFG

PLECFLLAAMAYDRFVAICSPLLYSTKMSIQVCDQLFSEAYVGSLLNASS

FMISFFSLFFCGPSQVNHFFCDFAPLVELSCSDVSIPAVVPSFSAGSIIV

VTVIIIAISYVYILITIMKMCSTEGHHKAFSTCTSHLTAVTLFYGTVTFI

YVMPKSSYSTDQNKVVSVFYMVVIPMLNPLIYSLRNNEIKAALKTQLGRK

IFT*

>LoafORs21.123P

MDSLVDEDHTAGAEFILLGLTEDPTLRVTPFMVILCVYLVTISGNLSTII

LIRISSQLHHHMYFFLSHLAFSDIGYSSSVTRNMLINFLVERHTISYLGC

ATQLGSVVFFGSAECYLLAAMPMITL*QSATHCFI*LKCPCKSVSSYSLW

LMYVLFSILVVILYALICYTSVDQIRPIIFSCDFAALVELSCSVSISAVV

PSFSAGS

>LoafORs21.124

MNFLVDGNHTSVKGFILLGLTEDPTLQVILFMVILCIYMVTISGNLSTII

LIRISSQLHHPMYSFLSHLALADIGYSSSVTPNMLINFLVETNTISYLGC

AIQLGSAAFFGTVECCLLAAMAYDRFVAICNPLLYSTKLSTQVCDQLFSV

VYVGGFLNASSFTISFFSLFFCGPNRVNHFFCDFAPLVELSCSDVSIPAV

VPSYAVGSIIVVTVMVIAISYVYILITIMKMHSTEGRHKAFSTCTSHLTA

VTLFYGTVTFIYVMPKSSYSTDQNKVVSVFYTVVIPMLNPLIYSLRNNEI

KGALKRQLGRKVFS*

>LoafORs21.125P

KFILLGLTEDPTLRVTPFMIVVWIYLVTMSGNLSTIILIRISAQLHHPMY

VFLNHLALTDIGFSSSVAPNMLINFLVERYTISYLGCAIQLGSVVFFGSA

ECCLLAAMAYDRFIAICNPLLYLTKMSIQVCVQLFTAACVCGFLNTCCCT

IFFDSLYFCGPNQVNHFFCDFAPLVELSCSDVSIPAVVPSFSAGSIIVVT

VIVIAISYIYILITILKMHSTQGRHKAFSTCTSHLTAVTLFYGTTTFIYV

MPKSSYSTDQNKVVSVFYMVVIPMLNPLIYSLRNNEIKAALKRQVGRKIF

>LoafORs21.126

MDSPVDGNHTAVTGFILLGLTDNSILRVILFMVFLFIYLVTLFGNLSTII

LIRISSQLHHPMYFFLSHLAFSDIGYSSSVTPNMLINFLVERHTISYLGC

AIQLGSVVFFGSAECCLLAAMAYDRFVAICNPLLYSTKMSTQVYVQLFSV

AYVGCFLNACCFTICFDSLFFCGPNQVNDFFCDFAPLVELSCSDVSIPAV

VPSFSAGSIIVVTMIVIAISYVYILITILKMHSTEGRHKAFSTCTSHLTA

VTLYYGTITFIYVMPKSSYSTDQNKVVSVFYMVVIPMLNPLIYSLRNNEI

KAALKRQLGRKISS*

>LoafORs21.127

MEFGNHIILPEFIILGLTQDPTLCVIFFVIFLGIYVVTLVGNISIIILIR

NCSQLHTPMYLFLSHLAFVDTGCSTSVTPIMLIGFLRHGTVLFVTVCETQ

LYSVVMFGTAECFLLAAMAYDRYVAICLPLFYSTHMSPRICIILVGASYL

GGCVNAWTFTSCLLSLSFCGPNQIDHFFCDFSPLLKLSCSDISVIQIIPS

ISSGSIIVVTVFVIALSYIYILITILKMHSAEGRHKAFSTCTSHLIAVIL

YYGTITFIYVMPKSSYSTDQNKVVSVFYTVVIPMLNPLIYSLRNRDVKEA

LRKVTVRIYS*

>LoafORs21.128

MKMVNHTIVTKFVILGLTDDPTLCSIFFVTFLGVYMVTILGNFRIIILIR

GSPQLHTPMYLFLTHLAIVDIGYSTSVTPLMIVSFLRERTAIPVAGCIAQ

LGSDIVLGTAEAFLLAAMAYDCYVAISSPLLYSTHMSPGACIILLVASYL

GGCVNATSCTGCLMSLTFCGPNKINHFFRDLPPLVKLSCTHIYMAEISPA

ISAGSVIVIMLFIIVVSYVHILHAILKMRSTEGRHKAFSTCTSHLTVVTL

FYGPVTFVYVIPKSSHSSAYVKVVSVFYTAVIPMLNPLIYSLRNKELKEA

MRKLMARTRWSF*

>LoafORs21.129P

VDSLVDGNHIAVAGFILLGLTEDATLRVIFLKVILCIYLVTISGNLSTII

LIRISSLLHHPM*F/FLSHLALADTGYSSSDTTNMLVNFLVERNDNLLSW

VQLGSAIFFRTAECFLSAAMAYDHFLAICNLLHYSTQMSTQVHKQLFSVA

YEAGFLSTSSFTISFFSLFFCGPNQVNHFFCDFAPLVELSCSDVSIPAVV

PSFSAGSIIVVTVFVIAISYIYILITILKMHSTEGRHKAFSTCTSHLTAV

TLYYGTTTFIYVMP

>LoafORs21.130P

VEVGNHTIVTKFIILGLTQNSTLCVIFFVIFLGIYVVTLVGNISIIILIR

NCSQLHTPMYLFLSHLAFVDTGCSTSVTPIMLIGFLRHGTVLFVTVCETQ

LYSVVMFGTAECFLLAAMAYDRYVAICSPLFYSTHMSPRICIILVGASYL

GGCVNSWTFTSCLLSLSFCGPNQIDHFFCDFSPLLKLSCSHTSTIQIIPS

ISSGSIIVVTVFVIVLSYIYILITILKMRSTEGRHKAFSTCTSHLTAVIL

YYGTITFIYVMPKSSYSSDQNKVVSVFYTVVIPMLNPLIYSLRNKDVKEA

LRKVTVRIYS

>LoafORs21.131

MKMVNHTTVTEFIILGLTDDPTLCSIFFVIFLGVYVVTIWGNFSTIILIR

GSPQLHTPMYLFLCHLAFVDIGYSTSVTPLMIVSFLRERTAIAVAGCIAQ

LGSNVIFGTAEAFLLASLAYDRYVAISSPLLYSTHMSPSVCIILLVASYL

SGCVNASLCTGCLMSLTFCGPNKINHFFCDLPPLVKLSCTHIYMAEISPA

ISAGSIIVITLFIIVVSYVYILHAILKMRSTEGRHKAFSTCTSHLTVVTL

FYGPVTFVYVIPKSRHSPDYVKVVSVFYTVVIPMLNPLIYSLRNKEIKEA

MRKLMARTHWSFLK*

>LoafORs21.132P

LVDGSCTALTGFILLGLTEDSTLLVILFMVILCIYLVTICGNLSTIILIR

ISSQLHHPMYFFLSHLA*ADIGYSSSITPYMLVNLLVERNTISYLGCTIQ

LGSAIFFGTVECFLLAAMACDHFVAICNPLLYSTKMSIQVCDDQLFSVAY

VGGFLNACCFTI*FDSLFFCGPNRVNHFF/FFLDFASLVELSCSAFSIPA

VVPSFSAGSIIVVTVSVMAISYVYILITILKMCSTDFSTCPSHLTAVILF

YGTITFIYVMPKSSYCTEQNMVVSVLYMLVIPLIYSLRNNEIKGALKIGR

KVFS

>LoafORs21.133

MEVGNHTILTEFIILGLTQDPTLCVIFFVIFLGIYVVTLVGNISIIILIR

NCSQLHTPMYLFLSHLAFVDIGSSTSVIPIMLIGFLRHGTVLLVTVCEAQ

LFSAVMFGTAECFLLAAMAYDRYVAICSPLFYSTHMSPRICIILVGASYL

GGCVNAWTFMSCLLSLSFCGPNQIDHYFCDFSPLLKLSCSDISKIQVFPS

ISSGSIIVVTVFVIALSYNYVLITILKMHSTEGRHKAFSTCTSHLTAVTL

YFGTITFIYVIPKSSYSSDQNKVVSVFYTVVIPMLNPLIYSLRNRDVKGA

LRKATIRIYS*

>LoafORs21.134

MATENHTTVAEFIILGLTDNPTLCAIFFVVFLAVYIVTIMGNISIIVLIR

RSPQLHTPMYLFLSHLAFVDTGYSTSVTPIMLMSFLRERTTIPVTGCIAQ

LGSDVTFGTTECFLLAAMAYDRYVAICSPLLYSTQMSPMVCFLLLGASYL

GGCMNASSFTGCLMNLSFCGPNEINHFFCDLFPLLKLSCGHVYIAEISPA

ISSGSVLVSTLFTIIVSYIYILHSILKMRSTERRNKAFSTCTSHLTAVTL

FYGTVMFVYVMPKSSYSADQVKVASVIYTVVIPMLNPLIYSLRNKEVKEA

MRKLVTRKQSFF*

>LoafORs21.135P

METGNRTTMTEFIILGLTKDSTLCSIFFVIFLGVYVVTIWGNFSTIILI*

SSPQLHTPMYLFLCHLAFVDIGYSTSATPLMIVSFLRERTAIPVAGCIVQ

LGFDVIFGTAECFLLAAMAYDRYVAISSPLLYSTHMSPGVCIILLVASYL

GGCVNASSFTACLMSLDFCGSNKINHFFCDLPLLVKLSCTRIYMAEISPA

ISAGSIIVITLFIIVVSYVYILHAILKMRSTEGRHKAFSTCTSHLTVVTL

FYGPVTFVYVIPKSSHSSDYVKVVSVFYTVVIPMLNPLIYSLRNKEVKEA

MRKLMARTRWSF*K

>LoafORs21.136

MGEDNQTFVAEFIFLGLSQDLRTQILLFILFLIIYLLTVLGNLLIIILIH

MDSQLHTPMYFFLSNLSFADLCFSTSIVPQMLIHLLVKKKMISFFRCMTQ

IIVFLLVGCTECALLAVMSYDRYVAVCKPLHYSTIMTQQVRLQLAIGSWA

SGALVSVVDNTFTFHLPYRGQKIINHYFCEPPALLKLASVDTYGTEMAIF

AMGVVILLAPVSLILISYWNIISTVLQMQSGEGRLKAFSTCGSHLIVVIL

FYGSGIFTYMRPNSKTTKERDKMVSVFYTVVTPMLNPIIYSLRNKDIKKA

LRKLAGRKSFSQRR*

>LoafORs21.137

MRQSNQTQVTEFFLLGLSDDPYTQKLLFILFLVVYLVTVLGNLLLMSLVW

VDSRLHTPMYFFLCNLSLADLCFSTNIVPQALGHLLSRKKAISFIHCAAQ

LLLFLILGGTQCALLSVMSYDRYVAICNPLHYTNIMTWKVCVQLATGSWA

SGVLGSVVETTFTLMLPYQGCKSIAHFFCEAPALLVLASTDTHTSEMVIF

LVGVVFLLIPVSLILVSYGRIIVTVVRMKSAAGRLKAFSTCGSHLIVVIL

FFGSAIMTYMTPKSSKKQEKVMSVFYAVVTPMLNPLIYSLRNKDVKGALR

KVTTRNFPCSLGIYH*

>LoafORs21.138P

NMVNHYFCDSPLSLHWSALITVFELQSLTAAVLFILFLFLLILESFVHIL

FTFFRMPSADEK*KAFFMCPSHLLVFSLFYSTAILTYILPQSSISPESRK

LLSLSYTVLTPMLSPIIYSLRNSEIKAVLRRVVLRTLDIR

>LoafORs21.139

MRQSNQTQVTEFFLLGLSDDPYTQKLLFILFLGVYLVTVLGNLLLMSLVQ

VDSRLHTPMYFFLCNLSLADLCFSTNIIPQALVHLLSRKKTISFIHCAAQ

LLLFLIFGGTQCALLAVMSCDRYVAICNPLHYSDVMTWRICVQLATGSWT

SGILVSVVDTTYTLRLPYQGSNSIAHFFCEAPALLVLASTDTHTSEMAIF

LVGVMILLIPVSLILVSCGCVVVTMVRMKSAAGRLKAFSTCGSHLIVVIL

FYGSAVITYMTPKSSKEQEKIVSVFYAVVTPMLNPLIYSLRNKDVKGALR

KVTTSHFACNLGIYH*

>LoafORs21.140P

PLNYRLYSFSLFLAIYMVTLMSNVLIILVTTADSALQSPMYFFLKNLSFL

EIGFNLVIVPKMLGTLIMQDTTISFLGCATQMYFFFFFGAAECCLLATMG

YDRYVAICNPLRYPVIMGRRACAHLAAASWFSGFPVATVQTTWIFSFPFC

GPNRVNHFLFDSPPVIALVCADTSLFELEALTATVLFILFPFLLILGSYV

HILSTIFRMPSAEGKCKAFSTCSSHLLVVSLFYSTAILTYFRPRSSTSPE

SKKMLSLSYTVVTPMLNPIIYSLRNSEVKAALKRVIRKTLAFRN

>LoafORs21.141

MSILMPIPMTRGNKTRVSEFILMSFSSLPTEIQSLLFMTFLIVYLITLLG

NSFIIMVTLTDSMPHNPMYFFLRNLSFLEIGFNLVIVPKMLGTLLAQDTT

ISFLGCATQMSFFFFFGVGECALLATMAYDRYVAICNPLHYPIIMNQRTC

ANMVAASWFPGFPAGIVQTMWLFSFPFCGTNKVNHFFCDSPTVLRLVCAN

TAMFEIYAIIRTILFVMIPCMLILCSYTHIAAAILKIPSAKGKRKAFSTC

SSHLLVVSLFCVSLSITYFQPKSNNSPNSKKLLSLSYTVVTSMLNPIIYS

LRNNEVKNALSWSFHKARCLS*

>LoafORs21.142

MPVPMAGENGTKLSEFILMSFSSLPAEIKSLLFMTFLIIYLITLVGNSLI

ILVTLADSMLHSPMYFFLRNLSFLEIGFNLVIVPKMLGTLLAQDTTISFL

GCAIQMYFFFFFGVAECFLLATMAYDRYVAICNPLHYPVIVNQRTCAKLA

AASWFAGFPVATVQTTWLFSFPFCGTNKVNHFFCDSPPVLRLVCANTAMF

EIYAIIGTILFVMIPCMLILCSYTRIAAAILKIPLAKGKRKAFSTCSSHL

LVVFLFYVSSSLTYFRPKSNNSPESKKLLSLSYTVVTPMLNPIIYSLRNN

EVKNALCRTFHKVIGLRNCIL*

>LoafORs21.143

MLERNITLVSEFILVGFPTASWLQILLFFLFLVVYLLVIVENLTIMLTVW

VTGSLHKPMYYFLSSMSFLEVWYVSVTVPKMLDGFLLQRQHISFTGCMTQ

LYFFISLACTECVLSAAMAYDCYVAICHPLRYPVIMTTGYCMQLVAFSYM

SGFMVSVIKVYFISHVTFCDSNVMNHFFCDISPILQLACKGMSTAELVDF

VLAIVILMFPFIITVLSYVCIVSTILHIPSTQGKKKAFSTCASHLAVVII

YYTAMIFMYVWPRAIASYNSNKLISAVYTVLTPMLNPFISCVRNQEVKKA

MRKTVGGGQYLLS*

>LoafORs21.144

MWKENTTNISEFILVGFPTAPWLQVLLFFLFLITYVFVLLENLVIILTVW

VTGSLHKPMYYFLSFMSFLEAWYLTVTVPKMLAGFFLHPNIISFLGCMTQ

LYFFISLACIECVLLSAMAYDRYVAICWPLCYPVMMTTGFCVQLTISSWV

SGFTISMAKVYFISQVVFCGNNILNHVFCDVSPILKLACVDFFMAEIVDF

ALAIVILVFPLSATILSYAFIVSTILHIPSATGQLKAFSTCASHLTVVVI

FYTAVIFMYVRPLAIASFNSNKLISVIYTVFTPMLNPIIYCLRNKEVKDA

IRKTMTSG*

>LoafORs21.145

MELWNSTLGSGFILMSILNDSGSPELLCATIAVLYMLALTSNGLLLLVIT

ADVRLHIPMYFLLSQLSLMDLLFASVVTPKTLVDYLRGENTISFGGCAFQ

MFMELTLGGAEDLLLAFMAYDRYVAICHPLNYMVLMRPRVCWLMVATSWI

TASMNALIHTSYTMQFPFCRSREISHLLCEIPPLLKLACAYTSRYKLMVY

MMGVMFLVPPLAAILASYTFVLVAVLHMSSGEGRQKALVTCSSHLTVVGM

YYGTVMFMYILPSFYHSPQQDNTLSVFYAIITPTLNPLIYSLRNKEVMRA

LHRVLG*

>LoafORs21.146

MGKENQTYLTEFILLGLSSDQHTQVLLFVVFLIIYLLTVSGNLLIIVLVN

ADSRLHTPMYFFLKNLSFADLCFSTSIVPQMLLHFLVMRKTISFARCSIQ

MVFFLVAGATESSLLAVMSYDRYLAVCKPLHYSTIMTQSVCVQLAIASWV

SGTFVSLVDTTFTLCLPYQGRNVINHYFCEPPALLKLASTNTYKAEMALF

SVGVAILLVPVSLILISYCNILSTVLRMQSGEGRFKVFSTCGSHLTVVIF

YYGSTIFTYMRPNSKKMNEGDKIISVFYSVITSMMNPFIYSLRNKDVKEA

FRKAFGR*

>LoafORs21.147P

MGEDNQTFVTEFVFLGLSRDPQMQDLLFFLFLIIYLLTVLGNLIIIVLIH

MHSRLHTPMHFFLRNLSFADLCFSTTIVPQVLVHFLVKRKTISFAGCSMQ

IVVLLLVGCTECILLAVMSYDCYVAVCKPLHYSAIMTRWVCVQLDIGPWA

SGTFVSLVDTTFTLRLPYKGNHIISHFFFF*TSCPPEA

>LoafORs21.148P

MEFWNSCMESGFILMGILNNSGSPELLCATIIVFYILALASNGLLLLVIT

MDV*LHVPMYLLLGQLLFMDLLFTSVVLPRPLWTF/TPKALVDFLHQENT

ISFGGCALQMFLALTLDGAEDLLLAFMAYDKYVAICHPLNYMVLMRLRVC

WLMVVTIWILASLSSVGHTLYTMHFPFCMSQEIRHLLCEIPPLLKLACAD

TSRYELMVYARGVS/AILASYSLILFTVLHMPSNAGRKKALVTCFSHLTV

VGMFYVAATFVYALLSFFPTPKQDSIISVFYTIITPALNPLIYSLRNKEV

IGALRKVLGKYM

>LoafORs21.149P

MELWNSSLGSGFILTGILNDSGSPELLCATITILYMLALTSNGLLLLVIT

MGV*LHVPMYHLLGQLSLMDLLFTFAVTPNTLVDFLHQENTISFGGCALQ

IFLALTLGGAEDLLLAFMAYDRYAVICNNLNYMILMRPRVCWLMVVTFWI

LA/PFLHVPGIQALLCEIPPLLKLACADTSRYELMVYVMGLTFLLLSLSG

TVASYTLLLFTVLHMSSNEGRQKALVTCSSHLTVVGMFYEGATFMYILPS

SFHSP*QDNIISVFGTIITAAVISLIYSLRNKEVMRALRRVLEKYM

>LoafORs21.150P

KENQTSVAEFNSLGVLQDPKVQILLFCVFLIFYLLSVFGNLFIIILIQTD

S*LHTPMYFFLKNLSFADLCFSTSMGPQILVYFFVKKKTIS

>LoafORs21.151P

MELWNSSLGSSFILMGNPNDSGSPELLCAINAVLYMLALTSNGLLLLAIT

MDVRLHAPMYLLLGQLSLTDLLFTSVVTPKTLVDFLHQENTISFGGCALQ

MFLALTLGSTEDLLLAFMAYDRYVAICHPLNYMVLMRPRVCWLMVVNIRI

LASLSSLGHTLYTMHFP/PFCMSREIRHLLCEIPPLLKLTCADTSRYELM

VYVRGVNYLLLPVSVIVASYILILFTVLHMSSNEGRQKALVTCSSHLTVV

GMFYGTATFMYVLPSSFHSRKQDIISVFYTIVTPALNPLIYSLRNRK

>LoafORs21.152P

IIFVLHVIITAILNQPYSRYPTPMYFFLKNLSFGDLCFSTSIIPQMLVQF

LLKKKTISFTGCSIQTVIFLLAGYTDCALLGVMSYD*YMAAYKPLHHSTI

VNLCSR

>LoafORs21.153

MGKENQTSVAEFILLGLSQDPKVQILLFCVFLIVYLLFVFRSRVIIILIQ

TDSWLHTPMYFFLKNLSFADLCFSTSIFPQMLIYFLVKKKTISFAGGSIQ

IVPFILAGCTQCALLAVMSYDHYVAVCKPLHYSTLTTQRVCVQLAVVSWI

SWAFVCSVDSAFTLCCPYQGQNVITHYFCEPTTLLKLASADTYQAEMALF

STGVVILPVPVLLIFVSYWHIFSTVMWIQSGEGRLKVFSTCGSHLTVVVL

YYGSGIFACMRPNSKVMSEKDKVISMFYSVMTSMSNPIIYSLRKKDIKGA

FMKLAGRQPAEAVISNVLL*

>LoafORs21.154

MGKENQTSVAEFILLGLSQDPKVQILFCVFLIVYLLSVFESLLIIILIQT

DSRLHTPMYFFLKNLSFADLCFSISIIPQMLVHFLVKKKTISFAEGSIQI

VPFILAGCTQCALLAVMSYDHYVAVCKPLHYSTLTTQRVCVQLAVVSWIS

WAFVCSVDSAFTLCCPYQGQNVITHYFCEPPTLLKLASADTYQAEMALFS

TGVVILPVPVLLIFVSYWHIFSTVMWIQSGEGRLKVFSTCGFHLTVVVLY

YGSGIFAYVRPTSKVMSEKGKVISMFYSVMTSMSNPIIYSLRKKDIKGAF

MKLAGRQLAEAVISDIFSQVLGNVIDNNVFKICILSSPWFVVSAYFFLHK

Y*

>LoafORs21.155

MELWNSTLGSGFILMSILNDSGSPELLCATIAVLYMLALTSNGLLLLVIT

ADVWLHIPMYFLLSQLSLMDLLFVSVVTPKILVDYLRGENTISFGGCAFQ

MFMELTLGGAEDLLLAFMAYDRYVAICHPLNYTVLMRPRVCWLMVATSWI

TASMNALIHTSYTMQFPFCRSREISHLLCEIPPLLKLACADTSRYKLMVY

MMGVMFLVPPLAAILASYTFVLVAVLHMSSGEGRQKALVTCSSHLTVVGM

YYGAVMFMYILPSFYHSPQQDNTLSVFYAITTPTLNPLIYSLRNKEVMGA

LHRVLGRCIFVHRLQLSNF*

>LoafORs21.156

MGKENQTYLTEFILLGLSSDQHTQVLLFVVFLIIYLLTVSGNLLIIVLVN

ADSRLHTPMYFFLKNLSFADLCFSTSIVPQMLLHFLVMRKTISFARCSIQ

MVFFLVAAATESSLLAVMSYDRYVAVCKPLHYSTIMTQRSCVQLAVVSWV

SGAFVCLVDATFTLCLPYQGRNVINHYFCEPPALLKLASTDTYKAEMALF

SMGVVILLAHVSLILVSYYNILSTVLRMQSGEGRFKVFFTCGSHLTVVIF

YYGSTIFTYMRPNSKKMNEGDKVISVFYSVITSMMNPFIYSLRNKDVKAA

FRKAFGRQSLSDAVIFTCI*

>LoafORs21.157P

MQKENRTSVAEFVLLGLSQDTKVQILLFCVFLIFYLL*VFENLIIIILIQ

TDS*LHTLMYFFLKNLSFADLCFLTSMGPQILVHFLVKKKTI

>LoafORs21.158P

MELWNSSLGSSFILMGNPNDSGSPELLCAINAVLYMLALTSNGLLLLAIT

MDVRLHVPMYLLLSQLSLTDLLFTSVVTPKALVDFLHQENTISFGGCALQ

MFLALTLGSTEDLLLALMAYDRYVAICHPLNYMVLMKPRVIWLMVVNIRI

LASLSSLGHTLYTMHFP/PFCMSREIRHLLCEIPPLLKLTCADTSRYELM

VYVRGVNYLLLPFSVIVASYVLILFTVFHMSSNEGRQKALVICSSHLTVV

GMFYGTATFMYVLPSSFHSRKQDIISVFYTIVTPALNPLIYSLRNRK

>LoafORs21.159P

IIFILLLISNAILIQTDS*HHTPIYFFLKNLSFGDLFFFSSIIPQMLVQF

LVKKKIISLTGCSIQTVVFLLAVYTGYALLAVMSYD*HVAAYKPLHHSTI

V

>LoafORs21.160P

CLPYPEQNVVNHYFCEPPTLLKLASADTYQAEMALFSVGVVIPPVPVFLI

FVSYWHILSTVMWIQSGEGRLMVFSTCGSHLTVVALYYGSGIFAYMRPNS

KGMSEKDKVTSVFYSVMTSMSNPNIYSLRNKDLKGALRKLAGR*PSAAGI

SNVLL

>LoafORs21.161P

SLLIIILTQTDSQFHTPMYFFLKNLSFADLCFSTSIVPQMLVHFLVKKET

ISFVGGSI*IVVFILAGCRECAMQVVISYDHYVAVCKPLNYSTIMTQRVC

VQLAVVSWISWAFVCSVDSAFTLCLPYQRQNVINHYFCEPPTLLKLASTD

TYQAEVALFSMGVVILLAPVFLIFVSYWHIFSTVMWIQSGEGRLKVFSTC

GSHLTVVALYYGSGIFAYMRPNSKGMSEKDKVISVFY*AMTSMLNPNIYS

LRNKDVKWALRKLAGR*PSEAVISDNFS*VLRNVIESNVFKAYIFSSPWF

IV*AYFLLHKY

>LoafORs21.162P

MW*ENIASISESILVGFPTAPWLQVLLFFLFLITYLFVLLENLVIILTVW

VTGSLHKPMYYFLSTVSFLEAWYITVTVPKMLAGFLLHPNTISFLGCMTQ

LYFFISLACIECVLLAAMAYDRYVAICWPLHYPVMMTTGFCVQLTISSWV

NGFTISLAKVYFISQVLFCGKNILNHVFCDVSPILKLACVDFFMAEIVDF

ALAIVILVFPLSATILSYAFIVSTILHTPSASGQLKAFSTCASHLTVVVI

FYTAVIFMYV*TRAIASFNSNKLISVIYAVFT

>LoafORs21.163P

MELWNSTLGSGFILMDILNDSGSPELFCATIAVLYLLALTSNGLLLLVIT

VDVRLHVPMYFLLSQLSLMDLLFASVVTPKTLVDYLRGESTISFGGCAFQ

MFMVLTLGGAEDLLLAFMAYDRYVAICHPLNYMVLMRPRVCWLMVATSWI

MASLNALMHTSYTMQFPFCRSREISHLLCEIPPLLKLACADTSRYKLMLY

VLGVAFLMPPLAAILASYTFVLVAVLHMSSGEGREGRQKALL/SSHLTVV

GMYYGAAMFVYVLPSFYHSPQEDNILSVFYTIITPTLNPLIYSLRNKEVM

QALHRVLGRCIFLQRP*LYNF

>LoafORs21.164

MGKENQTYLTEFILLGLSSDQHTQVLLFVVFLIIYLLTVSGNLLIIVLVN

ADSRLHTPMYFFLKNLSFADLCFSTSIVPQMLLHFLVMRKTISFARCSIQ

MVFFLVAAATESSLLAVMSYDRYVAVCKPLHYSTIMTQRSCVQLAIVSWV

SGAFVCLVDATFTLCLPYQGRNVINHYFCEPPALLKLASTDTYKAEMALF

SMGVAILLAPVSLILVSYYNILSTVLRMQSGEGRLKVFSTCGSHLTVVVF

YYGSTIFTYMRPNSKKMNEGDKVISVFYSVITSMMNPFIYSLRNKDVKEA

FRKAFGR*

>LoafORs21.165P

MGEDNQTFVTEFVFLGLSRDPQMQGLLFFLFLIIYLLTVLGNLIIIVLIH

MHSRLHTPMYFFLRNLSFADLCFSTTTVAQVLVHLLVKRKTISFAGCSVQ

IVVLFLVGCTECVSLSVMSYDRYVAVCKPHALLHHHDSLGLCSVGHRVLG

QWGICVSGGHCIHTASAIQGKQYH*PFCFFCEPPALLKLASADTYSTEMA

IFATGVVILLAPVYIILVSYWNIISTVIQMQSGEGRLKVFSTCGSHLIVV

VLFYDSAIFAYMRPNSKKMNEGGKVISMFYSVITSVMTLFIYSLRNMDVK

QAFRK

>LoafORs21.166

MGEDNQTFVTEFVFLGLSQDPQTQGLLFFLFLIIYLLTMLGNLLIIVLLH

IDSRLHTPMYFFLRNLSFADLCFSTTTVPQVLVHLLVKRKTISFAGCSMQ

IVVLLLVGCTECALVAVMSYDRYVAVCKPLHYSTIMTHWVCVQLAIGSWA

SGAFVSLVDTAFTLRLPYRGNNIINHFFCEPPALLKLASADTYSTEMAIF

AMGVVILLAPVSLILVSYWNIISTVIQMQSGERRLKVFSTCGSHLIVVVL

FYGSAIFAYMRPNSKIMNEKDKMISVFYSAVTPMLNPIIYSLRNKDVKGA

LRRITA*

>LoafORs21.167

MDFWNSSLGSGFILMGILNNSGSPELLCATITILYMLALTSNGLLLLVIT

IDVRLHMPMYLLLGQLSFMDLLFTSVVTPKALVDFLHQENTISFGGCALQ

MFLALALGGAEDLLLAFMAYDRYVAICHPLNYMVLMRPRVCWLMVVTSWI

LASLSDLGHTLYTMHFPFCMSREIRHLLCEIPPLLKLACADTSRYELMVY

VMGVTFLMPPFAAILASYSLILFTVLHMPSNEGRKKALVTCSSHLTVVGM

FYGAATFMYILPSLFHNPKQDNIISVFYTIVTPALNPLIYSLRNKEVMGA

LRRVLGKYM*

>LoafORs21.168

MELWNSSLGSDFVLMGILNNSGSPELLCATITILYMLALTSNGLLLLVIT

MDVRLHMPMYLLLGQLSFMDLLFTSVVTPKALVDFLHQENTISFGGCALQ

MFLALALGGAEDLLLAFMAYDRYVAICHPLNYMVLMRPRVCWLMVVTSWI

LASLSALGHTLYTMHFPFCMSREIRHLLCEIPPLLKLACADTSRYELMVY

VTGVTFLLLPLSVIVASYILILFTVLHMSSNEGRQKGLVTCSSHLTVVGM

FYGGATFMYVLPSSFHSPKQDNIISVFYTIITPALNPLIYSMRNKEVMGA

LRRVLEKYMS*

>LoafORs21.169

MELWNSSLGSGFILMGILNDSGSPELLCATIAVLYMLALTTNGLLLLVIT

MDVRLHVPMYLLVGQLSLMDLLFTSVVTPKALVDFLHQENTISFGGCALQ

MFLALALGSAEDLLLAFMAYDRYVAICHPLNYMVLMRPRVCWLMVVTSWI

LASLSSLGHTLYTMHFPFCMSREIRHLLCEIPPLLKLACADTSRYELLVY

VMGVTFLLLPLSVIVASYILILFTVLHMSSNEGRQKALVTCSSHLIVVGM

FYGTATFMYVLPSSFHSPKQDNIISVFYTIITPALNPLIYSLRNREVVGA

LRRVLGKYLLLAPSTL*

>LoafORs21.170P

IIFILHIIITAIFIQTDSQLHTPVYFFLKNLSFADFCFSTSIVPQMLVHF

FVK*KIISFTGCSIQMVVFLLAGCTECALLVVMSYDCYMALCKALHYSTI

M

>LoafORs21.171

MGKENQTSVAEFILLGLSQDPKVQILLFCVFVMVYLLSVFGNLLIIILIQ

TDSRLHTPMYFFLKNLSFADLCFSTSIIPQMLVHFLVKKKSISFAGCSIQ

IVVFLLAGCTECALLAVMSYDRYVAVCKPLHYSTIMTQRICVRLATVSWV

SGAFVCSVDSAFTLCLPYQGQNVINHYFCEPPALLKLASADTYQAEMALF

SMGVVILLAPVFLIFVSYCHILSTVMQMQSGEGRLKVFSTCGSHLTVVVL

YYGSGIFAYMRTNSKGMSEKDKVISVFYSVMTSMLNPIIYSLRNKDVKGA

LRKLAGR*

>LoafORs21.172P

SSTAQLHLLTPTFFLLTGIPGIGSAQAWVTLVFGPMYLLALLGNGALLAV

VWIDTTLHQPMFFLLAVLAATDLGLATSIAPGLLAVLWLGPQPVPYAACL

FQMFFVHALTAMESGVLLTMACDRAVAVGSPLHYSILVTKARVGYVALAL

AVKAVAIVIPFPLLVAQFGHFRAKTIGHAYCAHMAVVELVVGNTQANNLY

GLALSLAVSGLDILGITSSYGLIAHVVLRLPTQEARAKAFGTCSSHICVI

LTFYVSGLFSYLTHRFGRHTVPKPVHILLSNIYLLLPPALNPLIYGVRTK

QIRDRLLETFTCTKS

>LoafORs21.173

MTQANLTIFHPAVFVLLGIPGLEAYHTWLSIPLCLMYITAVLGNSLLMVV

IITERSLHEPMYFFLSMLAMTDIMLSTTTVPKALAIFWLHSHDIVFDACV

TQVFFVHMIFVGESAILLAMAFDRFVAIRAPLRYTAVLTWPVVRRIALGI

VTRSFCIIFPVIFLLKRLPFCQTNIVPHSYCEHIGVARLACADITVNVWY

GFSVPIVMVTLDVILIAVSYSLILRAVFCLPSQDARHKALSTCGSHLCVI

LMFYVPSFFTLLTHRFGRNIPRHVHILLANLYVVVPPMLNPIVYGVKTKQ

IRENVAHQFYEIKAWCCASPLG*

>LoafORs21.174

MFGANLTTFHPAVFILLGIPGLEHYHTWLSIPFCLVYIIALLGNGALILV

VLHECTLHGPMYVFLSMLAGTDILLSTTTVPKALAIFWFHGGEIAFDACI

TQMFFIHVAFVAESGILLAMAFDRYVAICTPLRYTTILTPMAIGRMTLAI

WGWSIGTIFPTIFLLKRLPYCQTNIIPHAYCEHIGVAGLACADITVNIWY

GFSVPMASVLVDVALIGVSYTLILQAVFRLPSQDARHKALNTCGSHIGVI

LLFFIPSFFTFLTHCFGKNIPHHVHILLANLYVLVPPMLNPIIYGAKTKQ

IRDSMAHMLSFGRKS*

>LoafORs21.175

MSSSLTSIINSSVFILTGFPGLDKHYPWFSIPFSSIYATVFLGNSMVLHV

IRTEPSLHQPMFYFLALLAITDLCMGLSTVHTVLGILWGLSQEIDLDTCI

AQTYFIHGLSCTESGVLLAMAFDRFTAICNPLRYTSILTDSRIVHFMMTI

LMRSGLSILPVIIRLKFLHYCRPHILSHSFCLHQDLLRLACSDIRFNSFY

ALGLVICTLLLDAVLILISYVFILHTISAIASREERLKSLQTCVSHICAV

LVFYIPIIGLTMVHRFGKHLSPLVHVLMGNIYILFPPLINPIIYSIKTQQ

IQTRMKKWFSLKML*

>LoafORs21.176P

NNTHLF*HSFFVADIPGLTDSHI*ISLPFCFMFFSAMMGNGVILFLIQNE

CSLHQLMFFFLAIVSFVDLVLSVSSLPKMLAVFWFGPTAISSHSCLS*MF

FIHAFYAMESRGLVAMASITLWPFVTLHAMQPFIPQLLSPSLEVQWC*SV

*GWPSSFQAWLISCPTVAHTRLHIPTVSI*PWSSLPVVPPLCIHCTFVLA

IFFGGGDVAFIPNSYGQIVRALMHFPSHEACANAGSTSTAHVCVIFYGTG

FLSVVMQQFWPPTASTAKAILANLYLLFPSALDPIFYGVKTNQI

>LoafORs24.1P

MLSEGNQSIIPTFILLGFSEYAELHVPLFLTFLPTYTVTAVGNLGMIIII

RINPKLHTIMYFFLSHLSFVDFCYSTVVTPKLLENLIVEDRTIS/FSGCI

MQFCLACLFGVTETFMLTAMAYDHFVAVCNPLLYTTTMSQKLCVLLVAGS

YTWGIVCSLTLTYFLLTLSYCESSILSNFICDHSVIVSVSCSDPYISQML

CLLLPYSMR*AA**SSSLPVYSFLSLS*RCLLQVGAIKPSLPLPRT*PPS

PSSMGPSFSSTVSLTPNFLAHSKLASVFYTVVIPMLNPLIYSLRNKDVKD

TFRKLIKTKLLFQSP*Y

>LoafORs24.2P

SSHIMAVTTFYGSTAFRYLHPSKVGSTDQGKVSSVFYTIVVHMLNPMIYN

LRNKDVKFVLKKILETKVCS

>LoafORs26.1P

LAFVDICFSSTTIPKMLASHVSGHQGIPYASCLIQMFFI*FAGIDSFLLT

AMAFGRYAAICHPLYYTTSWTLRICGLLVVVSGTVALAHTLLLTHILFFC

HNLVLHFFCNFSLLLKLTCSDTFLSDVMAYMVGSLPSSPPQEGSGRLSLL

RLSPLSGVSILWDSHWGLLQSHGLPHGPDGHLQGHDIHRGHPHLSSFIYS

LHSSDMKGTL

>LoafORs26.2

MNVASWKMRKANQSITLDFILVGIFSHSRPHFLLFSLVAFMFTTGLLGNT

ILIFLIRMDSRLHMPMYFLLSQLSLLDIGFPLVTIPKMVANFLQREGSIS

FGGCAAQLFFLMLIGVSEGVLLCLMSYDRYVAVCHPLHYPVLMRRQVCLF

MVGTSWLSGVLVATIQTSITLHFPFCASHTVDHFFCELPALLKLSCEDTS

AYELVLSVSGVLILLLPMSLIATSYGHVLGVILRMPSAEARHKAFTTCSS

HITMVGLFYGAAVFMYMVPGTYHSPHQDNMVSLFYSLITPTLNPLIYSLR

NREVQMALVKVLGKAGFKPKR*

>LoafORs26.3

MGNQTQVSEFILLGLSAQPQQQQVLFSLSFSLYLIGSLGNLLTFLAIISD

PHLHSPMYFFLSNLSLLDICFTSTTIPKMLANHLFGCTNISFPACLAQMY

CFIAFGAADSILLSTMAYDRYLAICRPLHYMTIMNTFRGTLLVAIPWISA

NFVSMVHTILMTHLSFCSNRIPHFFCDLNALIKLSCSNTQINGMLVLLLG

SWVVLIPFVCIVASYTPIAMAVWRVPSAQGKWKAFSTCGSHFCVVILFYR

TIIGVYFNPASTHSTQRDMVATVMYTVVTPMLNPFIYSLRNQDLKVALRK

LLSGSHLAKSL*

>LoafORs26.4

MLGVNRSAVSEFILIGFSTFPHLQLMFFLLFLLMYLFTLLGNLLIMATIW

SKRSLHTPMYLFLCALSISEILYTFAIIPRVLVDLLSTRHAIAFVACASQ

MFFSFMFGFTHSFLLTVMGYDRYMAICHPLRYNVLMSPQGCACLVVWSWA

GGSVMGMVVTIAIFNLTFCGPNKIHHFACHVPPLLKLACGNDVPAVAKGV

GLTCITALMGCCLLILLSYAFIVATILKIPSAEGRHKAFSTCASHLTVVI

VHYSFASVIYLKPKGPQSLEGDTLMGITYTVLTPFLSPIIFSLRNKELKN

AMNKTFLSKLSPDKL*

>LoafORs26.5P

PRGCAFLVAWSWAGGSVMGMVVTTAIFNLTFCGPNEVHHFFCHVPPLVKL

ACGDNVSVVAKGVGLVCIAALLGCCLLILLSYAFIVAAILKIPSAKGRHK

AFSTCASHLIVVIVHYGFASVIYLKPKGPHSLEGDTLMGTTYTVLTPFLS

PIIFSLRNKELKNSLKKTFLSKLLP

>LoafORs26.6P

MLAQNHSTVSEFIPIGFSTSPHFQLMFFLLFLLMYLFTLLGNLLIMATI*

SKHSLHTPMYLFLCALSISEILYTFAIIPHMLVDLLSTCHAIAFVACASQ

MFFSFMFGFTRSFLITVMGYDCYVAICHPVR/NVLMRPQGCTCLVAWSWA

GGSVIGMVVTMAVFNLTFCGPNEAHHFLCHVPPLLKLACGGNMPAVAMGV

GLVCITALLGCFLLLMLLSYAFIVAAILKIPSAEGRYKAFSTCTSHLIVV

IVHYGFASVIYLKPKGPHSEVGDTLMATTYTVLTPFLSPIIFSIRNKELK

NALKKTFLSKLYP

>LoafORs26.7

MYSIDSVISFQAPEEQQGNRTWLVTEFVLVGFSNLPDLRTILFTLFFVTY

IITLSGNATIITIIHVDRTLHTLMYRFLAVLSLSETCYTLVTIPNMLAHL

LMESQAISIAGCQAQMFFFLGLGCSHCFLLTLMGYDRYVAICHPLRYSTI

MRPTISFCLGALVFCSGFSVALIETTMIFSSPFCHSNRVEHFFCDIAPVL

KLSCTESASKALVIFFLSILVVLVSFLLILFSYAFIVATILRIPSAAGRH

KAFSTCTAHLTVVIVHFGCAAIIYLRPESGGNHDQDRLVAVFYTVVTPLM

NPVVYTLRNKEVRVALRRNLARSCGSQSF*

>LoafORs26.8

MLFTLFFLTYLVTISGNITIITIIHVDRTLHTPMYRFLVVLSLSETCYTL

VTIPNMLAHLLMESQAISITGCWAQMFFFLGLGCSQCFLLTLMGYDRYVA

ICHPLRYSMIMRSTICFWLGALGFCSGFCVALIETTMIFSSPFCHSNRVE

HFFCDIAPVLKLSCTKSASKALVIFFLSILVVLVSFLLILLSYAFIVAAI

VRIPSAAGRHKAISTCAAHLTVVIVHFGCASIIYLRPESGGNRDQNCLVA

VFYTVVTPLMNPVVYTLRNKEVRVALRRNLARSCESQSF*

>LoafORs26.9

MEPENQTTVSEFLLLGLSEKPEHQALLFGLFLPVYLITITGSLLISLAII

KDSRLHTPMYFFLTNLSLVDIFLSSTTVPKMLMNIQAQSRTIPFAGCLAQ

MYAFHLFGTMDSFLLAVMAIDRLVAIIYPLHHSVIMSPRVCGLLVGVPWV

ITNLQSLVHTCLMAQLTFCAGSEIPHFFCDLMPLLKLSCSDTHINELVIF

AFGIVMGISPLSCILLSYICIFHTVFKIPSARGKWKAFSTCSSHLTVVSL

FYGTIFAVYLQPASLTSSQKDKVAALMCGVVIPMLNPFIYSLRNKDMKAA

LRKLIGKAASFQF*

>LoafORs26.10

MEPGNNTQISEFLLMSFSEGSKLQPFLFGLFLSMYLITLLGNLLIILAVI

SDSHLHTPMYFFLANLSFVDICFTSTTVPKMLVNIQMQSRVITYEGCITQ

MYFFVLLGALDNFLLTAMAYDRFVAICHPLHYTVIMNPRLCELLVLVSWI

ISILNSLLESLMVLRLSFCTDVEIPHFFCELNQVIQHACSDTFINDTVMY

FAAVLLGGGPLTGILFSYCKVFSSIRVISSVQGKCKAFSTCASHLSVVSL

FFCSILGVYFSSAATHNAYSVAVASVMYTVVTPMLNPFIYSLRNKDIKGT

LRKLLVREAMKQPFSQG*

>LoafORs26.11P

IEKRNQARVENFLLLRFAEEIDLKPLLLGLFLSMSPSPEICSSWPSSWIP

TSTSPCASSSPACPHLYTPMYFFLC*YLFPLHNHTKDAAEHPDTEQSSPM

RAASYSYCFFTVFRCLYNLLLTVMAYDHFVAICHSLYYMVIMNPQLCGLL

SRGSWCLSVMSSMLETLTACPSARKWKSPTYLRSSQGSEAHSTDTLINNV

MLCFGTSVL

>LoafORs26.12

MEPGNHTQVSEFILLGLSEEEELQTFLLGLFLSMYLVTFIGNFLIILATI

TSSHLHTPMYFFISNLSFVDICFTSTTVPKMLLNIHTHNKAITYQGCLTQ

MYFFILFAELDVFLLSIMAYDRFVAICHPLYYMVIMNSRHCGLLLLLSWI

LSALNSLLRSLLVLRLSFCTNLEIPHFFCEVNQVIQLSCSDTLLNIIEMY

FATMVMGIIPFTGIVFSYSQIISSILRIASAKGKYKAFSTCGSHLLVVSV

FCSTALGVYLSSATTQNSRASAIASVMFTIVTPMLNPFIYSLRNKDIKGA

LKNFVGIVSL*

>LoafORs26.13P

SFVDIYFTSTTVPRMLLNIHTHNKAITYQGCLAQIYFFILFMQLDVFSFV

*WL*PVCGHLSPTALYGRHESQTLWLVAALFLDIECPDCLLCSLLVLRLS

CTNMKIPYFCEINQVIQHVCSDNLLNIIEMYFVTEVMGIIPLTGIIFSYS

RIVSSILRITTVRGKYKAFSTCGSHLSVVFLLYGAGLGAYLSSTTIQNSR

ASAIASVMYTIVTPMFNPFIYNLRKKGVKGAV

>LoafORs26.14

MEPGNDTQVLEFILLGLSEVEELQSLLLGLFLSMYLVTFIGNLLIILATI

TSSHLHTPMYFFLANFSFVDICFTSTTIPKMLLNIHTHNKTITYHGCLTQ

MYFFILFVELDGFLLSIMAYDRFVAICHPLHYTVIMNPRLCVLLLLLSWI

LSVLDSLLRGLLVLRLSFCTNLEISHFFCEINQVIQLACSDTLLNIIEMY

FATVVMGIIPLIGIVFSYSQIVSSILRITSARGKYKAFSTCGSHLSVVLL

FYGTALGVYLSSATTQNSRASAIASVMYTIVIPMLNPFIYSLRNKDIKGA

LKILVGIVTSNE*

>LoafORs26.15

MEPENHTDVLEFILLGLSEVEELQSLLLGLFLSMYLVTFIGNLLIILATI

TSSHLHTPMYFFLANFSFVDICFTSTTIPKMLLNIHTHSKIITYQGCLTQ

MYFFILFAELDILFLSIMAYDRFVAICHPLHYTVIMNPRLCGLLLLLSWI

LSVLGSLLRVFLLSQLSFCTNLEIPHFFCEINQVIQLACSDTLLNIIEMY

FATVVMGIIPLTGIVFSYSQIVSSILRITSARGKYKAFSTCGSHLSVVSL

FYGTGLGVYLSSATTQNSRASAIASVMYTIVTPMLNPFIYSLRNTDIKGA

LKNLIWLDTLSE*

>LoafORs26.16

MEPGNHTEVLEFILLGLSEVEELQSLLLGLFLSMYLVTFIGNLLIILATI

TSSHLHTPMYFFLANFSFVDICFTSTIIPKMLLNIHTHNKIITYQGCLTQ

MYFFILFAELDILLLSIMAYDRFWAICHPLHYTVIMNPRLCVLLLVSSWI

LSALDSLVHGLLVLQLSFCTNLEIPHFFCEINQVIQLACSDTLLSIIEMY

FGTVVIGIISLTGIIFSYSQIVSSILRITSARGKYKAFSTCGSHLSVVSL

FYGTGLGVYLSSATTQNSRASAIASMMYTIVTPTLNPFIYSLRNKDIKGA

LKSLVGIVTLNE*

>LoafORs26.17P

MEPGNHRDFRIYSPWTLRSGRTAICFS*AFPVQHLVTFIGNLLIILATIP

SSHLHTPMYFFLSNFSFVEICFTFSTIPKMLLNMHTHNKAITYQGCFSQM

YFFTLCAELDVFFLSIMAYN*FVANCHPLHYTVIMKPILCILLLLLSWIL

GVLGSLLLVLLVLQLSCTNLEIPTSSVKSIRLSNLPVLTPFSVL*RCILQ

LW*WALFLSLLSYFLILRLSLPYRELHQQGESIGIFHLWVSPFSCLFVLW

YRS*GLPQFCPIQNSKSMAICSVMYTVVTSMLNPFIYSLRNQDIKKPKAS

GVELILTN

>LoafORs26.18

MEPGNHTEVLEFILLGLSEVEELQSLLLGLFLSMYLVTFIGNLLIILATI

TSSHLHTPMYFFLANFSFVDICFTSTTIPKMLLNIHTHNKTITYQGCLSQ

MYFFILFAELDSFLLSIMAYDRFVAICYPLHYTVIMNPRLCVLLLLLSWI

LSGLDSLVHGLLLLQLSFCTNLEIPHFFCEINQVIQLACSDTLLSVIEMY

FTTVVVAIIPLTGIIFSYSRIVSSILRITSARGKYEAFSTCGSHLSVVSL

FYGTGLGVYLSSATTQNSRASAIASGMYTIVTPMLNPFIYSLRNKDIKGA

LKSLVGIVILNE*

>LoafORs26.19P

YTVFMNPGSVACCCCFPGY*VSWILLLRNLLILRLSFCTNLEIPHFFCEI

NQVIQLACSHTLLNIIEKYFATVVMGIIPLAGITFSYSQIVSSILRITSA

RGKYKAFSTCGSHLSVVSLFYGTGLAVYLSSTTIQNFRASAIASVMYTIV

TPMLNPFIYSLRNKDIKRVLKSLVGIVTLNE

>LoafORs26.20P

MEPENHTKISEFILLGLSEEEELQSLLLRLFLSVYLVTFIGNLLIILAII

TGSHLHTPMYFFLANLSFVDVCFTSTTVPKMVLNIHKKKKKNFFFFFFF*

MD/YDQFVAICHPLHYMVIMNPRLCGLLLLFSWILSVLDSLTRSLLVLRL

SFCTYMEIPHFFCEINQVIQLACSDTLLNII/FATGVMGIIPLTGIVFSY

SQIVSSILRITSVRGKYKAFSTCGSHLSVVSLFFDIGLRVYLSSTTTQNS

TASAIASVTYVVVTPMLNPFIYSLRSKDIKAALKSL

>LoafORs26.21

MEPGNHTEVLEFILLGLSEVEELQSLLLGLFLSMYLVTFIGNLLIILATI

TSSHLHTPMYFFLANFSFVDVCFTSTIIPKMLLNIHTRNKIITYQGCLMQ

MYFFILFAELDILLLSIMAYDRFVAICHPLHYTVIMNPRLCVLLLVSSWI

LSVLDSLVHGLLVLQLSFCTNLEIPHFFCEINQIIQLACSDTLLSIIEMY

FATVVIGIISLTGIIFSYSRIVSSILRITSARGKYKAFSTCGSHLSVVSL

FYGTGLGVYLSSATTQNSRASAIASVIYTIVTPMLNPFIYSLRNKDIKGA

LKSLVGIVTLNE*

>LoafORs26.22P

FPVQHLVAFIGYLLIILATIPSSHLHTPMYFFLSKFSFVEICFTFTTIPK

MLLNIHTHNKAITYQGCFSQMYFF/FFSLCAELDVFLLSILAYNQFVAIC

HPLQYTVIMKPRLCVLLLQFSWILGVLGSLLLGLLVLRLSFCTNLEIPHF

FCEINQVI*LACSGALLSIIEMYFATVVLGIIPLPSVVFSYSQIVSSIQR

ITSARGKYRHF/SEGKV*AFSTCGSHLSVVYWFYGTGLEACLSSATIQNS

RAMAICSVMYTVVTPMLNPFIYSLRNQDTK

>LoafORs26.23T

LHTPMYFFLANFSFADICFTSTTIPKMLLNIHTHNKTISYQGCLSQMYFF

ILFAELDSFLLSIMAYDRFVAICYPLHYTVIMNPRLCGLLLLLSWILSGL

DSLVHGLLVLQLSFCTNLEIPHFFCEINQVIQLACSDTLLSIIEMYFATV

VVAIIPLTGIIFSYSRIVSSILRITSARGKYKAFSTCGSHLSVVSLFYGT

GLGVYLSSATAQNCRSSAIASGMYTIVTPMLNPFIYSLRNKDIKGALKNL

VGLVILNE*

>LoafORs26.24

MEPGNHTEVFEFILLGLSEVEEVQSLLLGLFLSMYLVTFIGNLLIILATI

TSSHLHTPMYFFLANFSFVDICFTSTTIPKMLMNIHTHNKTITYQGCLTQ

MYFFILFAELDIFLLSIMAYDRFVAICHPLHYTVIMNPRLCGLLLLLSWI

LSVLDSLLRGLLVLRLSFCTNLEIPHFFCEINQVIQLACSDTLLNIIEMY

FATVVMGIIPLTGIVFSYSQIVSSILRITSARGKYKAFSTCGSHLSVVSL

FYGTGLGVYLSSATTQNSRASAIASVMYTIVTPMLNPFIYSLRNKDIKGA

LKSLAGIVTLNE*

>LoafORs26.25P

LFLSMYLATFIGNLLIILATITSSHLHTPMYFFLANFSFVETGFTSTTIP

KMLMNIHTHSKTITYQGCPTQMYFFI/FFHFFAELDIFLISIMAYDRFVA

ICHPLHYLMNPRLCVLLLLLSWILSVLDSLLRGLLVLQLSFCTNLEIPHF

FCEISQVIQLACSDTLLNTTEMYFGTVVMGIIPLIGVVFS*SQIVSSILR

ITSARGKYKAFSTCGSHLSVVSLLYGTVLGVYLSSATTQNSRAVAVASVM

YTIVTPMLNPFIYSLRNKDIKRALKSLVGVIILNK

>LoafORs26.26

MEPGNHTEVLEFILLGLSEVEELQSLLLGLFLSMYLVTFIGNLLIILATI

TSSHLHTPMYFFLANFSFVDICFTSTTIPKMLLNIHTHNKTITYQGCLTQ

MYFFILFAELDIFLLSIMAYDRYVAICHPLHYTVIMNPRLCGLLLLLSWI

LSVLDSLLHGLLVLQLSFCTNLEIPHFFCEINQVTQLACSDTLLSIIEMY

FSAVVIAIVPLTGIVFSYSRIVSSVLRITSARGKYKAFSTCGSHLSVVSL

FYGTGLGVYLSSATTQNSRASAIASVIYTIVTPMLNPFIHSLRNKDIKGA

LKGLVGIVTLNE*

>LoafORs26.27

MERENHTQISEFILLGLSEQEEMQSLLLGLFLSLYLLSFIGNLLIVLATI

TGSHLHTPMYFFLANLSFVDICFTSTTVPKMLLNIHTYNKAITYQGCLAQ

IYFFILFIQLDVFFLSIMAYDRFVAICHPLHYMVIMNPRLCGLLLLFSWI

LSVLDSLLRSLLVLRLSFCTNLEIPHFFCEINQVIQLACSDNLLNIIEMY

FATGVMGIIPLTGILFSYSRIAFSILRITSARGKYKAFSTCGSHLSVVSL

FYGTGLGVYLSSTTIQNSRASAIASVMYTIVTPMLNPFIYSLRNKDIKQA

LKSLVGIVTLNK*

>LoafORs26.28

MELGNDTEVLEFILLGLSEVEELQPLFLGLFLAMYLVTFIGNLLIILATI

TSSHLHTPMYFFLANFSFVDICFTSTTIPKMLLNIQTHNKTITYQGCLTQ

MYFFILFAELDIFFLCIMAYDRFVAICHPLHYTVIMNPRLCVLLLLLSWI

LSVLDSLLRGLLVLRLSFCTNLEIPHFFCEINQVIQLACSDNLLNIIEMY

FATVVMGIIPLTGIVFSYSRIVSSIRRITSARGKYKAFSTCGSHLSVVSL

FYSTGLGVYFSSSTTQNSRESAISSVIYTTVTPMLNPFIYSLRNKDIRGA

LKGLVGIVTLND*

>LoafORs26.29

MEPGNRTEVLDFILLGLSEVEELQSLFLGLFLSMYLVTFIGNLLIILATI

TSSHLHTPMYFFLANFSFVDICFTSTTIPKMLLNIHTHNKTITYQGCLSQ

MYFFMLFAELDVFLLSIMAYDRFVAICHPLHYTVIMNPRLCVLLLLLSWI

LSVLGSLLRGLLVLRLSFCTKLEIPHFFCEINQVIQLACSDTLLNIIEMY

FATVVMGIIPLIGVIFSYSQIVSSIRRITSARGKYKAFSTCGSHLSVVSL

FYGTALGVYLSSATTQNSRAVAVASVMYTIVTPMLNPFIYSLRNKDIKRA

LKSLVGAITLNE*

>LoafORs26.30

MEQENQTHVSDFILLGLSEETKMQPLLFGLFLSMYLITFIGNLLIILAFV

TDSHLHTPMYIFLSNLSFVDICFTSTTVPKMLLNIRMQSKVITYEGCLSQ

MYFFMCFGQLENFLLTVMAYDRFVAICHPLQYTIIMNPKLCGLLLLISWL

LSVLDSLLHDLMILRLSFCTELEIPHFFCDLNQVVQLACSDTSLNELVMY

FATGLLGVIPITGIFFSYSKVVSSILKISSARSKYKAFSTCGSHVSVVFL

FYGTFVGIYLSSAATQNSRKTAIASVMYTVATPMLNPFIYSLRNKDIKQA

LKKLIS*

>LoafORs26.31

MESRNYTRVLEFFLLGLSEETEMQPFLFGLFLSMYLIIFIGNLLIILAII

TDSHLHTPMYFFLFNLSFADICFTSTTVPKMLLNIQMQSKVITYEGCLSQ

MYFFMLFGVLDNFLLTVMAYDRFVAICHPLHYTVIMNPKFCGLLLLLSWV

LSVLDSLLHGLMILHLSFCAELEIPHFFCELNQVVQLACSDTFLNDLVMY

FTTAILVVIPPTGIFLSYSKIVVSVLRISSAGGKYKAFSTCGSHLSVVSL

FYGTSVVVYLSSGITQSSRESAIASVMYTVVTPMLNPFIYSLRNKDIKQA

LRNLFS*

>LoafORs26.32

METGNQTSVSEFILLGLSEEAEFQPLLFGIFLFMYLVMFIGNLLIILAII

SDSHLHTPMYFFLSNLSFADICFTSTTVPKMLLNIKMQSKVITYEGCLSQ

MYFYMVFGQLDNFLLTMMAYDRFVAICHPLLYMVIMNSKFCGFLLLVSWL

LSILDSLIHDLLILQLSFCEELKIPHFFCELNQVIQLACSNIFLNELVLY

FANGLLGVIPLIGIILSYSKIVSSILKISSARGKYKAFSTCGSHLSVVFF

FYGTFLGVYFSSAAMQNSRKTAIASVMYTVVTPMLNPFIYSLRNKDIKQA

LKKLFRAAI*

>LoafORs26.33

MEPRNQTGTSEFILLGLSEEAEVQPLIFGIFLSMYLVTFIGNLFIILAVI

TNSHLHTPMYFFLSNLSFADICFTSSTIPKMLLNIQMQSKVISYEGCLSQ

IYFFMVFGRLDNFLLTVMAYDRFVAICYPLHYTVIMNPKICGLLLLKSYL

LSVLDSLLHDLMILRLSFCTQLEIPHFFCELNQVVQLACSDTFLNDLVMY

IANGFLVIIPLTGIILSYSKIVSSILKISSAVGKYKAFSTCGSHLSVVSL

FYGTLLGVYLSSAATQSSRKTAIASVMYTVVTPMLNPFIYSLRNRDIKLA

LKKLFSCKTLSI*

>LoafORs26.34

MWMPPEQNQSWVSEFILFGFSGDPTSNRILFFAFLLLYLSSILGNGLIIT

LICLDSHVHTPMYFFLCILSLLDMGCVTTTMPQMLVHLLAHSQTISFASC

WLQMYVFGALGLTECIFFVVMAYDRYVAICYPLRHTVILSWDLCTRLAAQ

TWACGFFFSLIHTFLTMRLPYCGPNIVNHYFCEGPSVRSLACMDTQLIEM

VDLVISVFVLVTPLSLILASYIHIALAILKIKSTRGRCKAFSTCAAHLTV

VTLFYAPATYIYMRPKSSYSSERDKQISLFYNAFTTLLNPVVYSLRNKDI

KGAFLKVMERGRVTC*

>LoafORs26.35T

LDNFLLTVMAYDWFVAICHPLHYMVIMNPKFCGLLLLTSWLLTILYSLLH

GLMVLRLSFCTELEIPHFFCELNQVVQLACSDTFLNDLVMYFTTGLEGVI

PLTGILFSYTKIVSSILRISSAGGKYKAFTTCGSHPSVVSLFYGTALGVY

LSSAATQNSGGRTLASVMYTVATPMLNPFIYSLRNKDIKQALRNLFS*

>LoafORs26.36

MEPGNRTCVSEFILLGLSEEAELQPLLFGLFLSMYLITLIGNLFIILAII

TDSHLHTPMYFFLCNLSFADICFISSTVPKMLLNIQMQSKVITYEGCITQ

MYFFMLFGGLDIFLLTVMAYDRFVAICHPLHYVVIMNPKFCGLLLLTSWL

LTVLYCLLHGLMVLRLSFCTELEIPHFFCELNQVVQLACSDTFLNDLVMY

FTTGLEGVIPLTGILFSYTKIVSSILRISSAGGKYKAFTTCGSHLSVVSL

FYGTGLGVYISSSATQTSMARTIASVMYTVATPMLNPFIYSLRNKDIKQA

LKKLFS*

>LoafORs26.37

MEPGNRTCVSEFILLGLSEEAELQPLLFGLFLSKYLITLIGNLFIILAII

TDSHLHTPMYFFLCNLSFADICFISSTIPKMLLNIQMQSKVITYEGCITQ

MYFFVLFGGLDNFLLTVMAYDRFVAICHPLHYMVIMNPKFCGLLLLTSWL

LTVLYCLLHGLMVLRLSFCTELEIPHFFCELNQVVQLACSDTYPNDLVMY

FTTGLEGVIPLTGILFSYTKIVSSILRISSAGGKYKAFTTCGSHLSVVSL

FYGTVLGIYLSSAGSQASMARTIASVTYTVATPMLNPFICSLRNKDIKSR

L*

>LoafORs26.38

MEPGNRTCVSEFILLGLSEEAELQPLLFGLFLSMYLITFIGNLLIILAII

TDSHLHTPMYFFLSNLSFADICFISSTVPKMLLNIQVQSKVITYEGCITQ

IYFFMLFGGLDIFLLTVMAYDRFVAICHPLHYKIIMNPKFCGLLLLTSWL

LTVLCSLSHGLMVLRLSFCTELEIPHFFCELNQVVQLACSDTFLNDLVMY

FTTGLEGIIPLAGILFSYTKIMFSISRISSAGGKYKAFTTCGSHLSVVSL

FYGTVLGICLSSAGTQTSKARTIASVMYTVATPMLNPFIYSLRNKDIKQA

LKKVFS*

>LoafORs26.39P

METRNQTGVENFLLLGFAEQMDLKPLLLGLFLSMYLVTFTGNLLIILAIS

SDFHLHTPMYFFLSKLSFADICFTSTTIPKMLLNMQVQNKVITYVGCLTQ

IFFFIVFGCLDNLLLTAMAYDRFVAICHPLHYTVTMNPHFCGLLTLGSWC

LSVMGSLLETLTILRLSFCKHMEIPHFF/KFPTFFCDLPEVLKLACSNTL

INNIVVYFVTSVLGVFPFTGILFSYSQIASFILRISSARGKYKAFSTCGS

HLSVVSLFYGTGLGVYLSSAATASSRTSLMASVMYTVVTPMLNPFIYSLR

NRDMKRALGRLLGRAAIS

>LoafORs26.40P

YMEPGNQKGLPVFLLLELSEKPQIKSILLLLCLYLLTFAGNLFIILATSS

DLHLHTPIHFLLSNSSFSEIYFTSTTLPKMLLNIQMQNKVIIYVGCIMQM

YFLTVFGLSDYLLLSAVAYGCFMAVHYPLHYKVIMNPCLCARLLLLTWLV

SMLEALPESLTMLRLFFCATIEIPCYFCEFLSSSSSALTTSLITLCYIVT

GVVGFFPLVGILFSYSQIVSSVLKISTEGGKYKVFSTCGSHLSAIFLFYR

TCLGIYLGSTSTHASRVGTFASVPYTMITSMMNSFIYSLRNRDMKRASRK

QLYSESSSQ

>LoafORs26.41P

IEPQNLTHVSEFLLLGLSENPGLQPLLFGMFLSMYLVTVLGNLFIVMAVS

RDPHLHTPMYFFLSNLSLADIGFTSTTVPKLIVDIQAHSRVISYAGCLTQ

MSFFMLFGCLDSLLLTSMAYDRFVAICHPLRYRVIMNPCLCGLLVLASIF

ISLLVSQLHSSVVLQVTYFRDVEIAHFFCDPSQLLSLACSDAFINNIVMY

IIGAMSGFLPISGILFSYSKIVSSVLRVPSSGGKYKAFSTCVSHLSVVCL

FYGTGLGVYLSSAVSSSPRKGAVASVMYTVITPMLNPFIYSLRNRDIKRA

LRRLLSTAA

>LoafORs26.42

MIFINKMEPRNQTSNSKFLLLALTEDPELQPLLFSLFLSIYLATILGNLL

IVLAVTFDSHLHTPMYFFLASLSFTDICFSTTTISKILVNLQAQNQSISY

AGCLTQVCFVLVFASLENFLLGVMAYDRYVAICDPLRYTIVMNPWLCGLL

VLLSLSISIMNALFQSLMVLRLSFCTHLEIPYFFCEAVQVIKVTCSDTLI

NNIFLYFATTILGGIPLSGIIFSYTQIVSSIMRMPSAGGKYKAFSTCGSH

LSIISLFYGTGLGTYISAAFTHSSRKTAVASVMYTMVTPMMNPFIYSLRN

RDLKGALRKIIRSVPPFQ*

>LoafORs26.43P

MEPQNLTGVSEFFLLGLSEDPELLPFLFGLFLTMYLITVLGNLLIILVVG

SDSHLHTAMYFFLSNLSLADIGFTSTTIPKMLVNIQTRRKSITYVGCLIQ

VSFFSVFGCLDSLLLTAMAYDRFVAICHPLHYTVIMNPRLCGLLVLVSFA

ISLLDSQLHISMVSQLTFCKNVEIPHFFCDPPQLLNLACSDTSTDTILLY

CIGAIFGGVPASGILFSYMRIGSSILKVPSSGGKYKAFPPVA/SFSTCGS

HLSVVCLFYGTGIGVYLSSAVLSSSRKGAVATVMYTVVTPMLNPFIYSLR

NTDITRALWRLLGRT

>LoafORs26.44

MESQNITSVSKFLLLGFSDDPELQTLLFGMFLFMYLVAVLGNLLIILAVS

FDSHLQTPMYFFLSNLSLADIGFTSTTVPKMLNDIHTHHKIISYVHCLIQ

LSLLNFFGSMDSLLLTTMAYDRFVAICQPLRYPVIMNPRLCGLLVLVSFF

ISLFYSQLHCFMMSQLTFCTDVEIPSFFCDTPQLLNLACSDTSTIIILGY

CICAIFGGVPVSGILFSYMQIVSSVLKVPSSGGKYKALSTCGSHLLVVCL

FYGTGLGVYLSSVILLSLRSGAVASVIYTIVTPMLNPFIYSLRNRDIKRA

LQRLLSRTAYF*

>LoafORs26.45P

VEPQNLTCVSEFLLLGLSEDPELQPLLFGLFLSMYLITVTGNLLIILAVT

SDLHLHNPMYFFLSNLSLADIGFTSSTVPKMLVNIQTHSKSITYAGCLTQ

VSFF/FFYLFGCLDSLLLTVMAYDRFVAICHPLHYTVIMNPRLCGLLVLA

SYFISLLDSQLHISMVSQLTFCTDLEIPHFFCDPPQLFKFACSDTSIHIM

LVYCIGAIFGGVPLSGVLFSYTRIASSILQVSSSHGKYKRFSTCGSHLSV

VCLFYGTGLGVYLSSAVISSPRKCVVSSVMYTVVTPMLNPFIYSLRNKDI

KKALWRLLSR

>LoafORs26.46T

MEPQNLTDVSEFFLLGLSEDPELQPLLFGLFLSMYLITVTGNLLLILAVT

SDSHLHTPMYFFLSNLSLNDIGVISTTILKMLANIQTHSKSITYAGCLTQ

VSFFYLFICLDTVLLSVMAYDRFVAICHPLHYIVIMNPRLCGLLVLLSFF

ISLLDSLLHFSMMSQLTFCTDVKIPHFFCNPPQLFQFACSDTSIHILLVY

CGGAIFGGVQISGILFFYTRIASSILRISSSGGKYKAFSTCGSHLTVICL

YYGTGLGVYFSSAATSSPRMCAVSSVM

>LoafORs26.47

MEPQNLTDVSEFLLLGLSDDPELQPLLFGLFLSTYLITVTGNLLIILAVT

SDSHLHTPMYFFLSNLSLADIGFISTTVPKALVNIQTGSKSITYGGCLIQ

MTFFYLFGCLDDLLLTVMAYDRFVAICHPLHYTVIMNPRHCGLLVLVSFF

FSLLDSQLHISMVSQLTFCTDVEIPHFFCDPPQLFSLACSDTSISIILVY

CIGVIFGGVPVSGILFSYSRIVSSILRVSSSGGKYKAFSTCASHLSVVCL

FYGTGFAVYLSSAVSSSPRKYAVSSVMYTVVTPMLNPFIYSLRNRDIKRA

LLRLLKKTA*

>LoafORs26.48

MEPQNLTDVSEFFLLGLSEDPELQPLLFGLFLSMYLITVTGNLLLILAVT

SDSHLHTPMYFFLSNLSLTDISVISTTLLKMLVNIQTHSKSITYAGCLTQ

VSFFYLFICLDTVLLSVMAYDRFVAICHPLRYTVIMNPRLCVLLVLVSFF

ISLLDSLLHISMMSQLTFCTAVKIPHFFCNPPQLFQFACSDTFIHILLVY

CSGAIFGGVPISVILFSYARIVSSILRISSLGGKYKAFSTCGSHLTVVCL

YYGTGLGVYFSSAATSSPRMCAVSSVMYTVVTPMLNPFIYSLRNRDIKKA

LWRLLSRRV*

>LoafORs26.49P

MEPQNLTDVSEFLLLGFSDDPGLQPLLFGLFLSMYLITVTGNLLIILAVT

FDSHRHTPMYFFVSNLSLADVGLISTTVPKMLVNIKTQSNSITYEGCLIQ

MTFF/FFYLFGCLDNLLLTVMSYDRFVAICHPLHYTVIMNPRHCGLLVLV

SFFISLFDVQLHISMVS*LNFYTVVEIPHFFCDPPQLFSLACSDTSINII

LVYCIGVIFGGFPFSGILFSYSRIVSSILRVSSSGGKYKAFSTCASHLSV

VCLFYGTGLGVYLSSAVSSSPRKCAVSSVMYIVVTPMLNPFIYSLRNRDI

KRALLRLLSRTA

>LoafORs26.50

MEPQNLTGVSEFLLLGLSEDPELQPLLFGLFLSMYLITVTGNLLIILAVT

SDSHLHTPMYFFLSNLSLADIVFISSTVPKMLVNIQAQSKTITYGGCLTQ

MSFFYVFACLDDLLLTVMAYDRFVAICRPLHYIVIMNPRLCGLLLLVSFF

ISLLDSQLHISMVSQLTFCTDVKIPHFFCDPTQLFRLGCSDTSIYIILLY

CIGAIFGCVPFSGILFSYTRNVSSILRVSSSGGKYKAFSTCGSHLSVVCL

FYGTGIGVYLSSAVSSSPRKCAVSSVMYSVVTPMLNPFIYSLRNRDIKRA

LRRLLSRTA*

>LoafORs26.51P

MAPENLTHVSEFLLLGLSEDPELQPLLFGMFLSMYLLTVLGNLLFILAVS

SDLNLHTAMYFFLSNLSLTDIGLTSATIPDMLTDIHRHHRIISFVNCQIQ

LSFFYFFCM/LVSFCLSLLKSQPHCVMVPQLTFCMEVEIPHFFCEPSQLI

NLTCSDTITKNILVYIMGAIFGGVPVSAILFSYTRIVSSILRVPSSCGKH

KACSTCGSHLSVVCLFYG

>LoafORs26.52P

MEPQHLTGVPEFLLLGLSEDPELQPLLFGLFL*MYFITMTGNLLIVPAVT

SDSHLHTTMYFFLSNLSLADIGFISTTVPKMLVNIQEKSKSITYGGCPIH

MSFFF/FFYLFGCLDDLLLTVMAYHLFLPICHSLHYTVIMNPHHCGLRVL

VSFFISLLNSQVHISMMSQLTFCTDVEIPHFFCDPL*LFGLACSDSSINF

IAVYCIVLV/VLYCIGAIFGGVPVSGILFSYSRIVSSILRVSSSGGKYKV

VSTFASHLSVVCLFYGSDLGVYLGSAISSSPRKCLVSSVMYTVVTPMVNP

FIYSLRNRDIKRALSRLLSRTA

>LoafORs26.53

MEPQNLTGVSEFLLLGLSEDPELQPLLFGLFLSMYLITVTGNLLIILAVT

SDSHLHTPMYFFLSNLSLADIGFISTTVPKMLVNIQTRSKSITYGGCLIQ

MSFFYVFACLDDLLLAVMAYDRFVAICHPLHYTVIMNPRLCGLLILVSFF

ISLLDSLVHISMVSQLTFCTDVEVPHFFCEPPRLFSLACSDSSIYIILMY

CIGAIFGGVPVSGILFSYIRIVSSILRVSSSGGKYKAFSTCASHLSVVCL

FYGTGLGVYLSSAVSSSPRKCAVSSVMYTVVTPMLNPFIYSLRNRDIKRA

LWRLLSRTA*

>LoafORs26.54P

MEPRNLTGVSEFLLLGLSEDPEL*PLLFGLFLSMYLLTVTGNLLIILAVT

SDSHLHTPMYFFLSNLSLADIGFISITVPKMLVNIQTRSKSITYGGCLIQ

MFFF/SFFYLFGCLDTLLLTVMTYDRFVAICHPLHYTVIMNPRLCGLLVL

VSFFISL/SMVSQLTFCTDVEIPHFFCEPPQLFNLACSDASIYIVLIYCI

VVIFVGVPKSGILFSYSRIVSSILRVSSSGGKYKTFSTCGSHLSVVCLFY

GTGLGVYLSSAVSFSSRKSSLSSVMYTVVTPMVNPFIYSLRNRDIKRVLW

RLLSRT

>LoafORs26.55P

MAPENQTRFSEFLLLGLSEDPELQPLLFGMFLSLYLLTVLGNLLSILAVS

SDLNLHTTMSFFLSSLSLADIGFTSATIPNMLTNIHAHHRIISYVSCLIQ

LSFFSFFLCMENLLLTVMAYDRFVAICHQLHYPVIMNSHFCGLLVLASFF

/FFLSLLDSQLHCLIMSQLTFCKEVEIPHFFCDPSQLINLACSDTTTKNI

LVYFIGSIFGGVPVSAILFSYTRIVSSILRVPSLRGKYKAFSTYGSHFSV

VCLFYGTGIGVYLSSAVSPSLRSGAAASVMYSVVTTMLNPFIYSLRNRDI

KKTLQRLLSQPG

>LoafORs26.56P

FAFMDILFLITMPYDWFMAICHSLHYLVIINLRLCGLMVLVSFFISLFDS

QLHRLVLLQLTFRTDV*IPSFFCDPP*FLSLACSDTSTNIILVYCIGAIF

DGVPLSGILFSYTRIVSSFVRVPSSDGKYKALSTCGPHLSVFCLFYGPGF

LVYLSSVVSPSLRSDAVALVMYSIATLMLNPFIYSLSNRDIKRNLQRLLS

RTAYF

>LoafORs26.57

MEPQNLTGISEFLLLGLSEDPELQPLLFRLFLTMYLVTVLGNLLIILAVS

SDPCLHIPMYFFLSNLALADTGFISTTVPRMLVNIQTQSKSITYGACLTQ

VSFFILFACWDVLLLTVMAYDRFVAICHPLHYLVIMNPRFCGFLVLVSCF

ISLLDSQLHCLMVSQLTFYMEVKIPHFFCDPSQLLNLARSDTFTKNILEY

FIGAILGGVPVSGILFSYSRIISLILRVPSSGGRYKAFSTCGSHLSVVCL

FFGTGLGAYLSSAISSSPRKDAVASVMYTVVAPMLNPFIYSLRNRDINRA

LWRLLRRTA*

>LoafORs26.58

MGPQNLTGVSEFLLLGLSEDPELQPLLFGLFLSMYLITVTGNLLIILAIT

SDPHLHNPMYFFLSNLSLADIGFISSTVPKMLVNIQSQSKSITYAGCLTQ

VSFFYLFGCVDDLLLTVMAYDWFMAICHPLHYTVIMNPRLCGLLVLVSFF

ISLLESQLQLSMVLSLTFCTAVKIPHFFCDIPQLFNLACSDTSTNTILLY

CFGAIFAGVPVTGILFSYTRIVSSILRVSSVGGKYKAFSTCSFHLSVVCL

FYGTGLGVYLSSAISSSARKGAVASVMYAMVTPMLNPFIYSLRNRDIKRA

LQRILSRAT*

>LoafORs26.59P

VDPQNLTSVSEFLLLGLSQDPELQPLLFGIFLFTYLVSVLGNLLIILAVN

SDPHLHTSMYFFLSILSLADIGFTSATIPKMLVDIHTHHRTISYVNCLIQ

LSLFSFFGCMDNLLLMVMAYDQCVAICHPLHYPVIMNPHLCDLLVLVSFF

FSLLHSQLHCLMVSQFTFCTEVEIPHFFCDPSQLINLACSDTTTKNMLVY

IIGSIFAGIPVSVILFSNTRIVSSILRVPWSGGKYKAFSTCGSHLSVVCL

FYGTGTGVYLSSAVSPSLRSGAAASVMYCLVTPMLNPFIYSLRNRDIKRA

LQRLFSQPA

>LoafORs26.60P

MEQQNLIEFLLLGHSEDLELQPLLFELFLTMYLVTVLKNLLSILAVSSDP

RLHNPMYFFLSDLA*ADIGFISTTVPTMLVNIQTQSKSITQWGCLTQCPF

FFFF/ALFFSFSCLDVLLLTVLAYYWFVAICHPLHYLVIMVPHLCGFLVL

VPFFLSLLNPQLHCLMVSQLTFYMEVKCLISFVTLLNLLCSDTSTENILV

YFIGAIFGGIPVLGILFSYTRIIFLILRVPSSGGRYKGFSTCGSHLSVVC

LFFGTDLGACLSSAISSSPRNCAVASMMYTVVAPMLNHFIYSLRNRDISR

AL*SLLSRTA

>LoafORs26.61

MKPQNLTGVSEFLLLGLSEDPERQPLLFGLFLSMYLITVTGNLLIILAVT

SDSHLHTPTYFFLSNLSLADIGFISTTVPKMLVNIKTQSKSIKYEGCLTQ

VSFFYLFGCLDNVLFATMAYDRFMAICHPLHYTVIMNPHLCGFLVLVSFF

ISLLESQLQLSMVLSLTFCTAVKIPHFFCDIPQLFNLACSDTSTNTILLY

CFGAIFAGVPVTGILFSYTRIVSSILRVSSVGGKYKAFSTCGSHPSVVCL

FYGTSLGAYLSSAVSSSARKGAVASVMYTVVTPMLNPFIYSLRNRDIKRA

LQRILSGTT*

>LoafORs26.62P

GTYLLWLR*SPTPHLHTPMYFFLSNLSLADIGFTSTTVPKVFVNTYTHQR

DISYLGCLIQLSFLYLFACLDSLLLMAMAYDRFVAICHPLYYPVIIYSHL

CGLLVLVSIFISFFLSQLHCIMVSQLTFCIDVEIPSFFCDPPQLFNLACS

NTSTNTISMYLVGAIFGCVPISGILFSYIRIFSSILRIPSSSGKAKAFVT

CGSHLSVVCLFYGTGIGVYLSSAVSLSLPKGAVASVLFTVVTPMLNPFIY

SLRNTDIKRALQRLLRRI

>LoafORs26.63

MEPQNLTGVSEFLLLGLSEDPKLQPFLFGLFLSTYLISVAGNLLIILAVT

TDSHLHTPMYFFLSNLSLADIGFISTTVPKMLVNIQTWSKSITYAGCLTQ

VSFFYLFICLDSLILAVMAYDRFVAICHPLHYTVIMNPRLCGLLVLLSFF

ISLLDSQLHMSMVSQLTFCTDVEIPHFFCDPPQLFNFACSDTSINIIFLY

CLGAIFGGIPISGIILSYARIALSILRVSSSGGKYKAFSTCGSHLSVVCL

FYGTGLGVYLGSAVSSSPRKGAVASVMYTVVTPMLNPFIYSLRNRDIKRP

LQRILSRKA*

>LoafORs26.64P

GVSKFLLLGFSENLEIQPLLF*LFLFMYLIVVAENILIILAVTSDSHLHI

PMYFLLSSLTFADSSFTSTTVKDASEHLDTEQILHLWVLADTVSFFFFFF

NLFEYLDSLLFTTMAYD*FLAICHPLHYTVITNPHLCGLQVLVCFFISLL

DSQLHISMVSQLTFCTDVEIPHLFCYPPQLFNLARSDTSTNTILLYCVGA

IIGDVLVSGILFSYT*LAFSILRVSPLGGKYKAFSPCGSHLTVVWLFYGT

GLGVYLS*AVLSSARKDTVM*TVATPLLKSLICSLRNRDFNRALWRLLSR

>LoafORs26.65

MDPQNLTHVSKFLLLGLSEDPELQPLLFGMFLSMYLLTVLGNLLFILAVS

SDPHLHTPMYFFLSNLALADIGFTSATIPKMLMNIHTHHRIISYVNCLIQ

LSFFSFFGCMDNLLLTVMAYDRFVAICQPLHYPVIMNLHLCGLFVLVSFF

LSLLYSQLHCLMVSQLTFCMDVEIPHFFCDPSQLFNLTCSETSIINILVY

FIGAIFGGVPVSAILFSYTRIFFTVLKVPSSGGKYKAFSTCGSHLSVICL

FYGTGIGVYLSSAVSSAPRSGAAAAVMYSVVTPMLNPFICSLRNRDIKRA

LQRLLSRQA*

>LoafORs26.66P

MDPQNLTRVSEFVLLGLSGDPELQSFLFGLFLSMYLLAVLGNLLIILAVS

SDLHLRTPMYFFLSNLSLADIGFTSVTIPKMLMDINTHHRIISYGDCLIQ

LSFFIFFGCMDNLLLGVMAYDRFVAICHPLHYP/IIISPNLCGLMVLVSF

FLSLLDSQLHCLMVSQLTFCTEVEIPHFFCDPSQLLNLVCSIATTKKILV

YILGAILGGVPVSAVLFSYTRMFFSILRVLSSRGKYKAFSTCGSHLSVVC

LFYGTAIGVYLSSAVSPSLRSGAAATVMYSVVTPMLNPFIYSLRNRDIKK

ALQRLLSRPA

>LoafORs26.67P

MEPGNQTSTSEFFLLGFSQDPEHQPILFGMFLSVFVVTVLGNLLIILTII

SDSHLHTPMYFFLTNLSLADICFISTTIPKMLVNIQTQNRSITYAGCITQ

MYFFMVFGGMDTFLLTLMAYDRFVAVCHPLHYLVIMNLCLCGLLVLVSWF

ISMMYSLMQSLLMLRLSFCTNWVIQHFYCELA*ALTIACSYTLVNHILLY

IMVTALLGIVPFAGILFSYTQIVSSILKIPSADGKYKAFSTCGSHLSVVS

LFYGTGLGVYLSSGASPSSWKAMVASVMYTVVTPMLNPFIYSLRNRDINR

ALQRL

>LoafORs26.68P

VAICHLCTILSS*TPGSVSFWFCCLVPSFAGSLLHILLMIWLNFCIGTEI

LHFFFELAQIIKLACSDTHINNIFLYVATALLVVFLLSEMLFSYSQIVSS

SLMRMLSAGGKYKAFSTCGSHLSLIPLFYGTSLGAYLSSLVIHSSQRSCI

ASVMYTVVTPMLSPFIYSLRN*GVKGALGRLFCRAASCP*WSLVSGLNGP

CGPQSQMA

>LoafORs26.69P

MDLQNLTRVSEFVLLGLSEDPELQSLLFGLFLSTYLLTVLGNLLIILAVS

SDLHLHTPMYFFLSNLSLADIGFTSTTIPKMLMDISTHHRIISYGDCLIQ

LSFFVFF/FLFFFGCVDNLILMVMAYDRFVAICHPLHYPVIMNPNLCGLM

VLVSFFLSLLDSQLHCLMVSQLTFCKEVEIPHLFCDPSQLINLACSDTIT

KNILVYIIGAIFAGIPVSAILLSYIQIVSSILRVPSSSGKYKAFSTCSSH

LSVICLFYGTGIGVYLSSAVSPSLRSGSVATVMYSVIIPMLNPLIYSLRN

RDIKRALQRLLSRSA

>LoafORs26.70

MEPQNLTRISEFLLLGLSEDPELQPLLFGMFMSMYLVTIAGNLLIILAVI

SNPHMHTPMYFFLSNLSLADIGFTSSTVPKVLMNIHSHQRDISYAGCLIQ

LAFLYLFGYLDSLLLMVMACDRFVAICHPLHYPVIMNPRLCGVLVLVSIF

ISFFDSQLHCIMVSQLMFCTDVEIPSFFCDSPQLFSFACSDTSTNTILIY

LVGAIFGGVPISGILFSYTRIVPSILRVPSSGGKSKAFVICGSHLSVVCL

FYGTAAGVYLSSAVSHPVRMGAVASVMFTVVTPMLNPFIYSLRNTDIKRA

LQRLLSRMS*

>LoafORs26.71

MEAENQTKVSEFLLLGLSEDPELQPLFSGLFLSMYLVTVLGNLLIILTVS

SDPHLHTPMYFFLSNLSFVDICFITTTVPKMLVNIQTHSKAISYIGCLTQ

VYFFVIFVGLDNFLLSLMAYDRFVAICHPLHYTVIMNPRLCVLLVLMSWV

IIFWVSLLHILLMMHLNFCISTEVPHFFCELAQIIKLACSNTFINNIFLY

VSTALLGVFPFSGILVSYYQIVSSLRRMSSAGDKYKAFSTCGSHLSVVFL

FYGTGLGVYLSSVVTHSSQRSSIASVMYTVVTPMLNLFMYSLRNKDVKGA

LGNLLCRAASFL*

>LoafORs26.72P

MEPEN*TSISKFFLLGFSQDPEHQPILFGTFLSMFVVTVLGNLLIILAII

SDSHLHTPMYFFLSNLSLADICFTSTTIPKMLVNIQTQNRSITYAGCITQ

MYFFMVFGGMDTFLLAVMAYDRFVAICHPLHYLVIMNPRLCGLLVLVSWF

ISLMYSLMQSLLVLRLSFCTNWIIQLFYCELAQALTIACSDTLANHILLY

IVTGLLGIVPFSGIVFSYTRIASSIMIIPSADGKYKAFSTCGSHLSVVSL

FYGTDLGVYLSSGASPSSWKGMVASVIYTVVTPMLNPFIYSLRNRDIKTA

LQRLL

>LoafORs26.73P

PVYFFLSNQSLADVSFTSATIPKMLVDFHTRHSIIFYVISCFSYLLLGFF

FFFFLYGQSVPDGDGL*SVCGHLSPTSLPVIMNPKLCGLIILVSFFLSLL

DSQMHFLKVS*LTFCTELEIPHFFCDLS*LINLACSNTTTQIILVYFIGA

TFAGVPVSAIIFSYTWIVSSILRVPSSCRKYKAFSICCFHLSVVCLFYVT

DIGVYVSSFVSASLRSDAAATAI*AVVTPTLNTFIYRLRNRDVKRTLQSL

LSRP

>LoafORs26.74

MEAENQTKVSEFLLLGLSEDPELQPLFFGLFLSMYLVTVLGNLFIILAVS

SDPRLHTPMYFFLSNLSFIDICFITTTVPKMLVNIQTQSKDISYIGCLTQ

VYFFMIFAGLENFLLTIMAYDRFVAICHPLHYTLIMNAQLCVLLVLISWV

IIFWVALLHILLITRLKFCIGTEIPHFFCELSQIIKLACSDTLINNIFLY

VLTALLSVFPFTGILFSYSQIVSSLMRVSSAGAKYKAFSTCGSHLSVVSL

FYGMGIGVYLSSAVTHSSQKSSIASVIYTVVTPMLNPFIYSLRNKDVKGA

LGKLLSRAACCP*

>LoafORs26.75P

MDP*NLIHVPEFLLLCFSEAPELYLLAMLGNLFIFLAVNSDFHLHTSMYF

FLSNLFLAEISFTSTKIPKMLMDIHTHHRIFSYGDCLVQLSCLCF/FMLF

GCMDNLFLILMAYDLFMAICHPLQYPVIMNPHLCGFMVLVSLFLSLSDSQ

LHCLMVSQLTLYREVEIPHFSVTLPKSSTLSVLIPPPKTH*CILLV*SL*

TFQSQ*SFSFILDSSIVRVPSSGGKYKAFSICCFHLSVVCLFYGTSIGVF

LSSGVSSSLRSGASASVIYIVVTPM*SPFI*SLRNRDIQRVLQSLLSRP

>LoafORs26.76

MEAENQTKFSQFLLLGFSEDSELQPLFFGLFLSMYVVAVVGNLFIILAVI

SDSHLHIPMYFFLSNLSFADICFITTTVPKMLVNIQTQSKDISYIGCLTQ

VYFFMIFIGLENFLLSMMAYDRFVAICYPLHYTVILNPQLCVLLVLISWV

IIFWVALLHILLITRLNFCIGTEIPHFFCELAQIIKLACSDTLINNIFLY

VLTNLLVVFPFSGILFSYSQIVSSLMRMSSSEAKYKAFSTCGSHLSVVSL

FYGTGIGVYLSSAVTHSSQESSIASVIYTVVMPMLNPFIYSLRNKDVKGA

LGKLLSRALSCSSW*

>LoafORs26.77

MEAENQTKVSQFLLLGFSEDPELQPLFFGLFLSMYLVTVLGNLFIILAII

SDSHLHTPMYFFLSNLSFVDICFVTTTVPKMLVNIQTQSKDISYMGCLTQ

MYFFMIFIVLDNFLLTIMAYDRFVAICHPLHYTVIMNPRLCVLLVLMSWV

IIFWVALINTLLITRLNFCIGTEIPHFFCELAQIIKVACSDTLIDNIFLY

VLTALLVVFPFSGILFSYSQIVSSLMRMSSAGAKYKAFSTCGSHVSVVSL

FYGTGIGVYLSSAVTHSSQESSIASVIYTVVTPMLNPFIYSLRNKDVKGA

LGKLLSRAISCSSW*

>LoafORs26.78P

MPVGSSLNVAFTFSSLHTNYMEAENQTKLSEFLLLGLSEDSELQPLFFGL

FLSMYMVAVLGNLFIILAVSSDPHLHTPMYFFLSNLSFVDICFITTTVPK

MLVNIQTQSKDISYIGCLTQVYFFMIFAGLDNFLLSLMAYD*FVAICHPL

HYTAIMNPRLCVLLVLMSWVIIFWLALFHILLMLRLNFCIGTEIPHFFCE

LAQIIKLACSDTFIDNIFLYVSTAMLGAFPFTGILLSYSQIVSSLMRMSS

SGDKYKAFSTCGSHLSVVFLFYGPGLVIYLSSAVTHSSQKSSIASVMYTV

VTPMLNPFVYSLRNNDVKGALGRLLCRAASFP

>LoafORs26.79

MDPGNQTGVLEFLLLGLSEDPGLQPLLFGLFLTMYLVTLLGNLFIILAFS

SDPHLHTPMYLFLCNLSFSDICFNSTIVPKMLRNIQTQNKIITYAGCITQ

TSLFMVFVYLDNFLLTVMAYDRFVAICHPLHYMIIMNPHLCGLLVLISWF

LSVIVSCLHSLMLLSLSFCTHTEISHFFCGFAEVLKYACSDTLSNYIVLF

SVIGSLGVVPLAGILFSYFKIISSILKMSSAGGKYKAFSTCGSHLTVVSL

FYGTGLGVYVYSAIVPSSPKGAIALVMYTVVTPMLNPFVYSLRNRDVNGA

LRKVFNRPFFCLSRVMDVGTGEVL*

>LoafORs26.80P

INFCIGTEIPHFFCELAQIINVACSDTLINNIFLYVATALLGVFPFMGIL

FSYSQIVSFLMRMSSAGGKYKGFSTCGSYLSVVSLFFGSSLGVYLSSSVT

HSSQKSSIATVMYTVVTPMLNPFIYSLRNKDMKGALGGLLSKAVSC

>LoafORs26.81P

PHLHTPMYFFLSNLSFVDICFITTTVPKMLVNIQTQSKDISYIGCLTQVY

FFMIFAGLRNFLLSMMAYAWFVAICHPLHHTVIMNLRLCVFLVLMSWIII

FWVSLLHILLITQLNICI

>LoafORs26.82T

METENQTGVLEFILLGLSEDLELQPFIFGLFLTMYLITVLGNLFIILAVS

SDAHLHTPMYFLLSNLSLIDICFSNTIVPKML

>LoafORs26.83P

MEPRNQIDASEFLLLGLTEDPELQPLLFSLFLSTYLVTFLGNLLIILAIS

SDSHLHTPMYFFLSNLSFTDICFSTTTTPKMLVNLQVENQSITYTGCLTQ

ACFVMIFACLENCLLEVMAYDHYVAICHPLRYTIIMKPNFCGLLSLLSLL

TSIVDALIHTLMVLHVCSCTNLETPHFFCELVQILKLACSDTLINYILLF

FVATVWGGVPLSGIIYSYTQVVFSVLRMPSTGGKYKGSSTCMSQLSVVSL

FYGTGHGVYISSAF

>LoafORs26.84P

MESEN*TDVAEFLLLGFSENPELQLLLLGMFLTMYLVTVLGNLLIVLAVN

SDSHLHTPMYFFLSNLSFSDICFSTTTVPKMLVNIQTQSKSISYTGCLTQ

ICFFLVFACLENCLLAAMAYDRYVAICHPLWYTVIMNPRLCGLLILFSLV

ISIMNALLHSLMVLRLSFCTDLEIPQFFCELPQVLKLACSDTLFNNILLY

FMTSILGAGTFLGIIFSYLKIVSSLLKMPSTGGMHKAFSTCGSHLSVVSL

FYGTGFGVYLNSAATLSSRKSAVASLMHTMVTPMLNPFIYSLRNKEMMGT

LRKLISKISSFH

>LoafORs26.85

MESENQTHVAEFLLLGFSENPELQLLLLGMFLTMYLVTVLGNLLIILAVN

SDSHLHTPMYFFLSNLSFSDICFSTTTVPKILVNIQTQSKSISYTGCLTQ

ICFFLVFACLENCLLAAMAYDRYVAICHPLRYRVIMNPRFCGLLILLSLF

ISIMNALLHSLMVLRLSFCTDLEISQFFCELPQVLKLACSDTLFNNILLY

FMTSILGAGTFLGIIFSYLKIVSSLLKRPPTGGMYKAFSTCGSHLSVVSL

FYGTGSGVYLSSTATVSSRKSAVASVMNTMVTPMLNPFIYSLRNKDMMGA

LQKLISKISSFY*

>LoafORs26.86

MESRNQTAISKFILLGLSEDMDLQPLLFWLFLYMYLVCVIGNLLIILAIS

SDSHLHTPMYFFLSNLSFTDICFTSTTIPKMLVNIQTQSKVITYEGCLTQ

MYFFMIFAELDDLLLTVMAYDRFVAVCHPLHYMVIMNPRLCGLLLLLSWL

ICLICSLLQSLMVLRVSFCRETEIPHFCCELAQILKLACSDTLINNILLC

FVTGLLGVVPLTGILFSYSRIISSIMSISSARGKYKAFSTCGSHLSVVSL

FYGVGLGVYFTSGTVHPSRKSSIVSVMYTVVTPMLNPFIYSLKNRDMKGA

LRKLFSRGSCSQ*

>LoafORs26.87

MESENQTGVAEFLLLGLSENPELQLLLLEMFLTMYLVTVLGNLLIILAVN

SDSHLHTPMYFFLSNLSFSDICFSTTTVPKMLVNIQKQSKSISYTGCLTQ

ICFVLVFACLENCLLAAMAYDRYVAICHPLRYTVIMNPRLCSQLILLSLF

ISIMNALLHSLMVLHLSFCTDLEIPQFFCELPQVLKLACSDTLFNNILLH

FITSILGCGTFLGIIFSYVQIVSYLLKMPSTGGMYKAFSTCGSHLSVVFL

FYGTGFGVYLSSAATVSSRKSAVSSVMHTVVTPMLNPFIYSLRNKDMVGA

LRKLISKISSFH*

>LoafORs26.88P

MEEGNQTKVSQFLLLGLSEDPELQPLFFGLFLSMYLVTVLGNLLIILAVS

FDPHLHTPMYFFLSNLSFVDICFITTTVPKMLVNIQTQSKDISYIGCLTQ

VYFFMIFAGLDNFLLSMMVYDRFVAICHPLHYTVIMNPRLCVLSVLMSWI

IIFWVSLLHILLITRLNFCIGTEIPHFFCELAQIIKVACSDTLINNIFLY

VATALLGVFPFTGILFSYSQIVSALMRMSSAGGKYKAFSTCGSHLSVVSL

FFGSSLGVYL

>LoafORs26.89

METENQTGVLEFILLGFSEDLELQPFIFGFFLTMYLITVLGNLFIILAVS

SDAHLHTPMYFFLSNLSLIDICFSSTIVPKMLVNIHTEKKTISCVDCLIQ

VYFSMLFPILDTLLLTVMAYDRFVAICHPLHYLAIMNPCLCSLLVFTTWF

IGVMISLLHISLMMHLTFCKDLEIPHFFCELTKILKLACSDTFLNSTLIY

FLTGVLGVFPLIGILFSYSRIVSSIRKMSSSGGKQKAFSTCGSHLSVVSL

FYGTGVGVYFTSAVTHSSQKVSIASVMYTVVTPMLNPFIYSLRNKDVKGA

LGMLLSRVLSCL*

>LoafORs26.90T

SVVSLFYGAGLGVYFTSGTTRPSRKGSIASVMYTVVTPMLNPFIYSLKNR

DMKGALRKIFNRGACSQ*

>LoafORs26.91P

LSEFLLLGLTEDPEL*PLLFSLFPSIYLVTFLGNLLVILAINSDSYLHTP

MYFFLSNLSFTDICFSTTMIPKMPVNLQVGNQSVTYTGCLT*AYFVMIFA

GWENCLLAVMACDCYVAICHPLRYTIIMNAGFCGLLSLLSLLTSTLRWHC

IRPSAQTWRSLISSVNLLRFSSSPVLIPSSVTP*CILWVLFLVCGGVPLS

EIIFSYSQVVSSLLRMPSTGGKYKAFSTGVSHLSVVSLFYGTGFGVFISS

AFTCSPRK

>LoafORs26.92

MESENQTGVAEFHLLGFSDNPELQLLLLGMFLTMYLVTVLGNLLIILAVN

SDSHLHTPMYFFLSNLSFSDICFSTTTVPKMLVNIQTQSKSISYTGCLTQ

ICFFLVFACLENCLLAAMAYDRFVAICHPLRYTVIMHFHLCGLLILFSLF

ISITNALLHSLMVLHLSFCTDLEILQFFCELPQVLKLACSDTLLNNILLY

FMTSIVGGGTLLVIIFSYMQILSSLLKMPSTGGMYKAFSTCGSHLSVVSL

FYGTGFGVYLNSAATVSSRKSAVASVMNTMVTPMLNPFIYSLRNKDMMDA

LQKLISKISSFH*

>LoafORs26.93

MKSANRTAVSGFLLLGLSEDPEVQPLLFGLFLSMYLVTVLGNLLIILAVI

SDSHLHTPMYFFLSNLSFVDISFTSTTVPKMLVNIQTENKAISYTGCLTQ

VYFSTVFICMDNLLLIVMAYDRFVAICHPLYYTVIMSPRLCGLLILLSFF

ISIMNALLQSLMVLHLSFCTDLEIPHFFCELAQILKLPCSDTLINNILLC

LATSLLGVVPLSGIIFSYIQIVSSILRIPSTGGKYKAFSTCGSHLSVVSL

FYGTSVGVYLSSAATLPPRRRAVASVMYTVITPIMNPFIYSLRNRDMKGA

VRKLISVIPSCF*

>LoafORs26.94

MKSANHTAVSGFLLLGLSEDLEVQPLLFGLFLSMYLVTVLGNLLIILAVI

SDSHLHTPMYFFLSNLSFVNISFTSTTVPKMLVNIQTENRAISYTGCLTQ

VYFFLVFICMDNLLLTVMAYDRFVAICHPLYYTVIMNPRLCGLLILLSFF

ISIMNALLQSLMVLHLSFCTDLEIPHFFCELAQILKLACSDTLINNILVY

LVTSLLGVVPLSGIIFSYIRIFSSILRIPSTGGRYKAFSTCGSHLSVVSL

FYGTCAGVYLSSAATLSSRRRAVASVMYTVVTPMMNPFIYSLRNRDMKGA

LRKLISVIPSCF*

>LoafORs26.95P

MKSENHTGV*GFLLLGLSEDPEVQPLLFGLFLSMYLVTVLGNLLIILAVI

SDSHLHTPMYFFLSNLSFVDICFTSTTVPKMLLNIRTENRAISYTGCLTQ

VYFFMVFIRMENLLLTVMAYDRFVAICHPLYYTVIMSPHLCGLLILLSFF

ISIMNALLQSLMVFHLSFCTDLEISHFFCELAQILKLACSDTFINNTHVY

LVTSLLGVGSLFGIIFSYFRIVSSILRIPSTGGKYKTFSTCGSHLSVVSL

LYGTCMGVYLSSAATLSSRRRAVASVMYTVITPMMNPLIYSLRNRDMKGA

LRKLISVIPSCF

>LoafORs26.96P

MKSANHTAVSGFLLLGLSEDPEVQPLLFGLFLSMYLVTVLGNLLIILAVI

SDSHLHTPMYFFLSNLSFVDICFTSTTVPKMLVKIQTESRAISYTGCLTQ

VYFSTVFICMDNLLLTVMAYDRFVAICHPLYYTVIMSPCLCGLLILLSFF

ISIMNALLQSLMVLHLSFCTDLEIPHFFCELAQILKLACSDTFINNILVY

LVTSLLGV/GIIFSYIRIVSSILRIPLTGGKYKAFSTCGSHLSVVSLFYG

TSVGVYLSSAATLSSRKRAVTSVMYTVVTPMMNPFIYSLRNRDMKGALRK

LISVIPSCFDCVICFGCGRPEQVSKEMNY

>LoafORs26.97

MKSANHTGVSGFLLLGLSEDLEVQPLLFGLFLSMYLVTVLGNLLIILAVI

SDSHLHTPMYFFLSNLSFVDICFTSTTVPKMLVNIQTENRAISYTGCLTQ

VYFFMVFICMDNLLLTVMAYDRFVAICHPLYYTVIMSPCLCGLLILLSFF

ISIMNALLQSLMVLHLSFCTDLEIPHFLCELAQILKLACSDTLINNIHVY

LVTSLLGIGPLSGIIFSYIRIFSSILRIPSTGGKYKAFSTCGSHLSVVSL

FYGTCVGVYLSSAATLSSRKRAVASVMYTLVTPMMDPFIYSLRNKDMKGA

VRKLISVITSCF*

>LoafORs26.98

MKSENHTGVSGFLLLGLSEDPEVQPLLFGLFLSMYLVTMLGNLLIILAVI

SDYHLHTPMYFFLSNLSFVDICFTSTTVPKMLVNIQTENRAISYTGCLTQ

VYFFMVFICMDNLLLTVMAYDRFVAICHPLYYTVIMNPRLCGLLILLSFF

ISIMNALLQSLMVLHLSFCTDLEIPHFFCELAQILKLACSDTLINNIHVY

LATSLLGVGSLSGIIFSYTRIVSSILRIPSTGGKYKAFSTCGSHPSVVSL

FYGTCVGVYLSSAATLSSRKRAVASVTYAVVTPMMNPFIYSLRNRDMKGA

LRKLISVIPSCF*

>LoafORs26.99P

MKSANHTGVSGFLLLGLSEDPEVQPLLFGLFLSMYLVTVLGNLLIILAVI

SDSHLHTPMYFFLSNLSFVDISFTSTTVPKMLVNIQTENRAISYTGCLTQ

VYFFLVFLCMEN/FFMYGKLLLTVMAYDRFVAICHPLYYTVIMSPRLCGL

LILLSFFISIMNALLQSLMVLHLSFCTDLEIPHFFCELAQILKLPCSDTL

INNILVYLVTSLLGVGSLSGIIFSYIRIFSSILRIPSTGGRYKAFSTCGS

HLSVVSLFYGTSVGVYLSSAATLSSRRRAVASVMYTVVTPMMNPFIYSLR

NRDMKGAVRKLISATPSCF

>LoafORs26.100P

TPLYFSLCNLPFSDICINSTIVPKML*TFRHRTKSSTMPAASPRHLFLWF

LCIWTISS*LQWSYD*FVAICHPCTAFSSRTPISEASWF*SLGFSVS*SP

VFIV*HCFTSHSVHTQKFFRDFVEIHKFACSDTLSNYVVLFSVTGMLDAV

PLAGVIFFYFKIISSILKMSSAGGKYKAVSTCGPHLTVVSLFYGTGLGVY

FFSTITPLPNGGNCLSDTTVVTPVLKSFFYSLRNRNMKGALRKVFSTPFF

CL*RAMDIGTGDVL

>LoafORs26.101

MGAENQTAFSEFFLLGLSEDTELQPLLFGLFLSIYLVTVLGNLFIILAVS

SDPHLHTPMYFFLANLSFVDICFITTMVPKMLVNIQTQSKVISYIGCLTQ

VYFFMIFVGLDNFLLSLMAYDRFVAICHPLHYTVIMNPQLCGFLVLMSWV

IVFWVSLLHILLITRLNFCIDTEIPHFFCELAQVIKLACSDTLINNIFLY

MATALLGVFPLSGILFSYSQIGSSLMKMSSAGAKYKAFSTCGSHLSVVSL

FYGTALGVCLSPTVIHASQRSSIASVMYTVVTPMLNPFIYSLRNKDVKIA

LGRLLCRAPSCP*

>LoafORs26.102P

MEVENQTKVFEFFLLGLSEDSEHQPLFFGLFLSMYLVTVLGNLLIILAVS

FDPHLHTPMYFFLSNLSFVDICFITTTVPKMLVNIQTQSKVISYIGCLTQ

VYFFMIFAGLDNFLLSLMAYDRFVAICHPLHYTVIMNPQLCGFLVLMSWV

IIFWASLLHILLIRQLKFCIGTEIPHFFCELAQIIKSACSDTLIINIFLY

MLIILLAVFPLLGILFSYSQIVSSLMSMSSAGGKYKAFSTCGS*LSVVSL

FYGTSLGVGLTSTVIHSSQRVSIASVMYTVVTPMLNPFIYSLRNKDMKGA

LGRMLCTAAS

>LoafORs26.103

MEVENQTKVFEFFLLGLSEDSEHQPLFFGLFLSMYLVTVLGNLLIILAVS

FDPHLHTPMYFFLSNLSFVDICFITTTVPKMLVNIQTQSKVISYIGCLTQ

VYFFMIFAGLDNSILSLMAYDRFVAICHPLHYTVIMNPQLCGFLVLMSWV

IIFWASLLHILLIRQLKFCIGTEIPHFFCELAQIIKSACSDTLIINIFLY

VLTVLLAVFPLLGILFSYSQIVSSLMSMSSAGGKYKAFSTCGSHLSVVSL

FYGTSLGVGLSSTVIHSSQRVSIASVMYTVVTPMLNPFIYSLRNKDMKGA

LGRMLRRAAS*

>LoafORs26.104P

FPLSGVLFSYSQIVYSLMSMSSSGGKYKAFSTCGSHLSVVALFYGTALGV

CLNSTVIHASQRSSIASVM*TVVTPMLNPFIYSLRNKDMKGALRRLLCRA

ASCPR*WPLASGLNGTHGLQSQKS

>LoafORs26.105

MEAGNQTKFSEFFLLGLSEDSELQCLFFGLFLSTYLVTVLGNLLIILAIS

SDSHLHTPMYFFLSNLSFVDICFITTTVPKMLVNIQTQSKVISYIGCLTQ

VFFFMIFAGMDNFILSLMAYDRFVAICHLLHYTVIMNTRLCVLLVLMSGV

IIFWASLLHILLITGLNFCTGTKIPHFFCELAQIIKLACSDTLLNNIFLY

MATVLLAMFPLSGVLFSYSQIVSSLMKMASAGAKYKAFSTCGSHLSVVSL

FYGTALGVCLSSTVIHASQRSSIASVMYTVVTPMLNPFIYSLRNKDMKGA

LRRLICRAASCALLWPLASGLNGLHGPQSQMS*

>LoafORs26.106P

MEAENQTKFSEFFLLGLSEDSELQPLFFGLFLSMYLVTVLGNLFIILAIS

SDPHLHTPMYFFLSNLSFVDICFITTTVPKMLVNIQTQSKVISYIGCLTQ

VYFFMIFAGLDNFILSLMAYDRFVAICHPL/YTVIMKPWLCVLLVLMSWV

IIFWASLLHILLITRLNFCIGTEIPHFFCELAQIIKLACSDTLINNICLC

VLTVLLVVFPLSGTLFSYSQIVSNLMRISSVGARYKAFSTCGSHLSVVSL

FYGTGLGVFLSSTVIHASQRISIASVMYTVVTPMLNPFIYSLRNKDMKGF

LRRLLCRAASCA***PLASGLNGLYGPQTK

>LoafORs26.107

MEAENQTKFSKFLLLGLSEDPELQPLFFGLFLSMYVVAVLGNLSIILAVT

SDSHLHTPMYFFLFNLSFVDICCITTTVPKMLVNIQTQNKDISYIGCLTQ

VYFFMIFAALDNFLLTMMAYDRFVAICHPLYYTVIMNPRLCVLLVLVSWV

IIFWVSLLHIVLITRLNFCIDTEMPHFFCELTQIIKVACSDTHINYIFLY

VLTALMGVFPLSGILFSYSQIVSSLMRMSSAGRKYKAFSTCGSHLSVVSL

FYGTGLRVCLSSAVTHSSQTSSIASVLYTVVTPMLNPFIYSLRNKDVKGA

LGRLLCRAGSCPR*

>LoafORs28.1P

LADACFVSTKVPKMLANIWT*NQVISYAVCLSQLYFFMLFVMLEAFLFAV

IAICHPLSYIMVMSPRLCVLLVIASWIMNALHFLLHALLMNSRP*DPTLL

LRHNPLLSLSLYKWAGDLHPWGTDRLSMCTLPDYLLCIYFLNHPEDPFSS

GKVESLFHLQLSSFCSLSLGLLFVFISVLPPPTHHRRPQLHQ*YTPVVTP

MLNPFIYSLRNRDIKSSLRKLIWAREIHS

>LoafORs31.1

MDQRNVTQVSEFVFLGLSQIQELQLFLFLVLLLVYITTIVGNLLIMITVT

FDSQLHTPMYFLLRNLAVIDLCFSSVTAPKMLVDFLSENKTISYQGCMAQ

IFFFHFLGGATVFFLSVMAYDRLIAISRPLHYVTVLNTQFCAGLVVAAWV

GGFLHSVVQLGLMLPLPFCGPNVLDNFYCDVPQVLRLACTDTSILEFLMI

SNSGMLDVIWFLLLLISYSIILVMLRSHPGEARRKAANTCTTHIIVVSMI

FIPSIYLYTCPFTPFSMDKAVSISHTVLTPMLNPMIYTLRNQKMQAAVKR

LGRLWLVCKSSDMCRSLPLPLFSHL*

>LoafORs31.2

MGPGNLTWVSEFVFLGLSQTQTFQRFLFLVFLFVYTTTVVANLLIVVTVT

CDSRLHTPMYFLLQNLAVLDLSFSSVTAPKMLADFLSEDKTISYQGCMAQ

IFFFYFLGGAMVFFLSVMAYDRLIAISWPPHYITTMNTQLCVGLVVTAWV

VGFVHSISQLAVMLPLPFCGPNILDNFYCDVPQVLRLACTDTALLEFFMI

CNSGMLDAVWFFLLLTSYSIILVMLRSHSGEERRKAASTCTTHIIVVSLI

FIPSIYLYARPFTPFSMDKAVPISHTVLTPMLNPMIYTLRNQKMQAAVKR

LGRLWLVCKKE*

>LoafORs31.3

MEPQNITWVSEFVLLGFSQTHELHKFLFLVFLFVYITTVVENLLITVTVI

FDSRLHTPMYFLLRNLAVIDLCFSSVTAPKMLVDFLSENRTISYQGCMAQ

IFFFHLLGGGTVFFLSVMAYDHYIAISRPLHYVTIMNTQFCVGLVVAAWV

GGFLHSIVQLGLMLPLPFCGPNVLDNFFCDVPQVLRLACTDTSLLEFLMI

SNSGMLVLIWFILLLISYTIILLMLRSHSGQERRKAASTCTTHIIVVSMI

FIPCIYIYSRPFTPFPTDKAVSISYTVMTPMLNPMIYTLRNQEMQSAMKR

LGRHLVICHRD*

>LoafORs31.4P

MEPQNITWVSEFVLLGFPQTQELQKFLFLLFLFVYITTVMGNLLVMVTVT

FDSQLHMPMYFLL*NLAVIDLCYSTVTSPKMLVNFFHETKTISYQGCMAQ

IFFFHLLGGGTVFFLSVMAYDRYIAISRPLHYVTIMNTQFCVGLVVAAWV

GGFLHSIVQLGLMLPLPFCGPNVLDNFFCDVPQVLRLACTDTSLLEFLMI

SNSGMLVLIWFILLLISYTIILLMLRSHSGQERRKAASTCTTHIIVVSMI

FIPCVYIYSRPFTPFPTDKAVSISYTVMTSMLNPMIYTLRNQEMQSAMKR

LGKYLVIGNRE

>LoafORs33.1P

SHDCYMTVCHQL*NPILI*ITVKSWFWGGT*WSHAGMQLLP*TSHFAEHM

RSITSVRPSDRSIWLVLTPLTDFEYVMYVCCVLMLLVPFSLILTSYSFIL

ATVHLMCCTDAWKKAFAM*SYTWL*WDSYGAVLSIYMRSKSYRSANHDKV

VSAFYTAFTPVLKPLIYSLRNSEIKGALRKCMGQGVALNH

>LoafORs33.2

MQGFNRTTVVTQFILVGFSSLGELQLLLFVIFLLLYLTILAANATIMAVI

HFSRVLHTPMYGFLFILSFSESCYTFVIIPQLLVHLLSATKTISFMACAS

QLFFFLCFACTNCFLIAAMGYDCYVAICHPLRYTLIMDKRLGLGLVSLSG

VTGFLIALVATNLICDMPFCGPNRVNHYFCDMAPVIKLACTDTQVKELAL

FSLSILVITVPFLLILISYGFIVNTILKIPSAEGKRKAFATCASHLTVVF

VHYGCASIIYLRPKSKSASDKDQLVAVTYTVVTPLLNPLVYSLRNQDVKA

ALKRFLRMPVATKVI*

>LoafORs33.3P

LYPRCWLTCWPRKKAISFLGCAISDVYFPFSWLLSLLSAGSHGL*SLHGH

SVTPLRYTVLVGYGVCVGLVAAAYACGFAVAQIITSLVFHLPFHSSNQLH

HFFCDISPVLKVASYHTHFSQVVIFMLCALVLVIPLSLILVSYIHIISAI

LQFLSTLGRYKAFSTCASHLMVVTVHYGCASFIYLRPQSNYPSSQDALMS

MSYTILTPLFNPMIYSLRNKEFKSALHRVV

>LoafORs33.4

MKRQNQSMINEFILTGFSNLGDLQILLFFIFLLVYLTTLTANATIMTIIR

LDQALHTPMYFFLFVLSCSETCYTLVIVPKMLTNLLSTNPTISFSGCAAQ

LYFFVGLACTNCFLIAVMGYDRYVAICNPLNYTLIVSRATCMHLVLASSF

CGFLISVVVNVLVFSMPFCASNRINHFFCDISPVIKLGCTDTNLKEKVIF

FLSILVLLFPFVLIFISYVFIVSTILKISSVEGQRKAFATCASHLTVVFV

HYGCASFIYLRPTSLYSSDKDRLVAVTYTVITPLLNPLVYTLRNKEVKTA

LRKVLNRYSFPKTV*

>LoafORs33.5

MERANETVVKEFVFLGFSSLAGLQRLLFIGFLLLYLFTLGTNAIIISTIV

LDSALHTPMYFFLAVLSCSETCYTFVIVPKMLVDLLAQKKTISFLGCAIQ

MFTFLFLGCAHSFLLAAMGYDRYVAICNPLRYTVLMGHAVCMGLVATACV

CGFAVSVVTSSLVFHLPFHSSNQLHHFFCDISPVLKLASHHSRLSQMIIF

MLGVFVLVVPLLLILVSYIHIISAILKIPSSVGRYKAFSTCASHLIVVTV

HYGCASFIYLRPKSNYSSSRDSLISVSYTILTPLFNPMIYSLRNKEFKSA

LRRAMGQMLFPAN*

>LoafORs33.6

MAENLTMVTEFLLIGFSSLGEIQLALFVVFLFLYLVILSGNVTIISIIRL

DRNLHTPMYFFLGILSTSETFYTFVILPKMLINLLSVARTISYTCCVIQM

FFFLGFAITNCLLLGVMGYDRYAAICHPLHYPILMSWQMCGKLAAACGFG

GFLASPMVVNLVFSLPFCNANKVNHYFCDISPVIRLACTNTDVHEFVIFI

CGVLVLVVPFFFVCISYLCILRTILKIPSVEGRKKSFSTCSSHLTVVIIH

YGCASFIYLRPTASYVSNKDRLVMVIYTIVTPLLNPMVYSLRNKDVQFAL

RRVLGKKVTLKSCK*

>LoafORs33.7

MERGNETVVKEFAFLGFSSLAGLQRLLFIVFLLLYLFTLGTNAVIISTIV

LDRALHTPMYFFLAVLSCSETCYTFVIVPKMLIDLLAQKKTISFLGCVIQ

MFAFLFLVCSHSFLLAAMGYDRYVAICNPLRYTVLMGHAVCMGLVATACA

SGFTVSLVTTSLVFHLPFHSSNQLHHFFCDISPVLKLASHHSLLSQMIIF

TLGVFVLVIPLLLILVSYIHIISAILKIPSSVGRHKAFSTCASHLIVITV

HYGCASFIYLRPKSNYSSSRDSLISVSYTILTPLFNPMIYSLRNKEFKSA

LRRAMGQMLFPAN*

>LoafORs33.8P

FFLSCL*VMAENLTMAAEFLLIGFSSLGENQLALFVVFLFLYLVILSGNV

TNISITCLGQSLHTPMYIF/FLGIPSTSETFYTFVILSKMLINLLSVART

ISFTCGVTQMFFFLGFAITNCLLLGVMGYDCYAAICHPLHYPILTSWQMC

GKLAAACGFGGFLASLMVVNLVFSLAFCNANKVNRYFCDISPVIRLACTN

TDVHEFVIFICGVLVLVVPFFFVCISYLCILRTILKIPSVEGRKKSFSTC

SSHLTVVIVHYGCASFISLRPTASYVSNKDRLVMVIYTIVTPLLNPMVYS

LRNKDVQFALRRVLGKKVTLK

>LoafORs33.9

MANSSFVTEFLLMGFSSLGKLQLVLFVVFLSLYLIILTGNITIISVIRLD

HNLHTPMYFFLCVLSISETLYTIVILPKMLFNLLSVLRTLSFTSCATQMF

FFLGFALNNSFILGVMGYDRYAAICQPLHYPILMSWKVCGQLAVISVICG

FLTSLVATVLVFSLPFCGPNKVDHYFCDISPVIRLACANAHVNELVIFIG

GALVLLVPLLFICISYGFIVHTILRIPSTEGKRKAFSTCASHLTVVIVHY

GCASSVYLRPSVKHTSSKNSLVTVTYTIITPLLNPMVYSLRNKDVQMAIK

KMFGKTVFFPKSL*

>LoafORs33.10

MANSSLVTEFLLMGFSSLGELQFVLFVVFSSLYLIILSGNFTIISVILLD

RSLHTPMYFFLCVLSISETLYTIVILPKMLINLLSVLRTLSFMSCATQMF

FFLGFAVTNCLLLGVMGYDRYAAICQPLQYPILMSWRVCGQLAVITIICG

FLTSLVGTVVVFSLPFCGPNKVDHYFCDISPVIRLACADAHINELVIFIA

GVFVLLVPLLFICISYGFIVHTILRIPSAEGKRKAFSTCASHLTVVIVHY

GCASSVYLRPSIKHMSGKDRLVTVTYTIITPLLNPMIYSLRNKDVQMAIR

KVFGKIGFSSKTL*

>LoafORs33.11P

ANVSSVTEFLLLGFSSLGETQLILFAVFLCLYLIIFSGNITIVTVICLDC

NLHIPMYFFLGILSISETCYAFVVLPKMLINLLSVLRTISFISCATQMFF

FLGFAVTNCMLLGVMGYDR*AAICHPLRYPILMSWQICGQLAVSCAGIGF

LFSLIGTLLVFRLPFCGPNKVNHYFCDISPVIRLACTDSNINE/IIFIGG

VLALMVPMTFICISYGFIVRTILKIPSAEGK*KAFSTCASHLTVVVVPYG

CASFVYLRPSPKFSSSKDKLVTVTYTVVTPLFNPMVYSLRNRDVQMAIWK

VIGRGGFYPKVL

>LoafORs33.12

MANSSFVTEFLLMGFSSLGELQLVLFVVFLSLYLIILSGNITIISVICLD

HTLHTPMYFFLCVLSVSETLYTIVILPKMHINLLSVLRTLSFMSCATQMY

FFLGFAVTNCLLLGVMGYDRYAAICQPLRYPVLMSRRVCGQLAVITIICG

FLTSLVGTTVVFSLPFCGPNKVDHYFCDISPVIRLACANAHVNELVIFIG

GALVLLVPLLFICISYGFIVRTILKIPSAEGKRKAFSTCASHLTVVIVHY

GCASSVYLRPSAKHTSGKDRLVTVTYTIITPLLNSMVYSLRNKDVQMAIR

KMIGKAVFFS*

>LoafORs33.13P

ANVSSVTEFLLLGFSSLGENQLILFAVFLCLYLIILSGNITIVTVIHLDC

NLHIPMYFFLGILSISETCYTFVVLPKMLINLLSVLRTISFISCATQTFF

FLGFAVTNCMLLGVMGYDRYAAICHPLRYPILMSWQICGQLAASCAGIGF

LFSLVGTLLVFRLPFCGPSKVNHYFCDISPVIRLACTDSNINELIIFIGG

VLALMVPMTFICISYGFIVCTILKIPSAEGKLKAFSTCASHLTVVIIHYG

CASFVYLRPSSKFSSSKDRLVTVTYTVFTPLLNPMVYSLRNKDVQMAIQK

VLGRGKCNPKVL

>LoafORs33.14

MRNLSGGQVEEFVLVGFPTSLPFQLFLFNLFFAIYLLTLFENALIITTIW

LTPSLHRPMYFFLGHLSFLELWYINVTVPRLLGAFLTQDNRVSYVGCMTQ

LYFFIALAGTECVLLAVMAYDRYLAICEPLRYPSLMPPSLATGLAAASWG

SGFFSSVMKLLFISRLSYYGPHIINHFFCDISPLLNLTCSDKEQAEIVDF

LLALVMILLPLLAVVSSYATIIAAILRIPTTQGCKKAFSTCVSHLTVVVI

YYSSTLFTYARPQAMYTFNHNKIISVFYTIIVPLLNPAIYCLRNKEVKDA

CKKTVLGGYHYPRDAPD*

>LoafORs33.15P

MANSSFVTEFLLMGFSSLGELQLVLFVVFLSLYLIILSGNITIISVIRLD

HSLHTPMYFFLC/CVLSVSETLYTIVILPKMLINLLSVLRTLSFMSCATQ

MFFFLGFAVTNCFVLGVMGYDRYAAICQPLRYPILMSWKVCGQLAVISII

GGFLTSLVGTTVVFSLPFCGPNKVDHYFCDISPVIQLACADAHVNELVIF

IGGALVLLVPLLFICISYGFIVLTILKIPSTEGKRKAFSTCASHLTVVIV

HYGCASSVYLRPSAKHTLGKDRLVIVTYTIITPLLSPMVYSLRNKDVQTA

IRKMIGKAGFF

>LoafORs33.16

MKKNQTIVKEFIFVGFSLYPDVQTLLFVVFFSLYLLTLMGNLTIMGLTWV

DRTLHTPMYIFLSALSFSETCYTLSIIPRMLTDLLTADRSISVIGCGLQM

CFFLGLGGTSCIILTLMGYDRFLAICNPLRYPLLMTNILCGELVAFAWAG

GFFVSLIEMALIFRNFFCSPNLVKHFFCHMRVVVRLSCLDSNLTEFIVTL

ISVSGLLGTFLLIILTYVFILSTILRIPSSDGKQKAFSTCASHLTVIIIH

FGFASIVYLNPETSGEGDTLISVPYTVITPFLSPLIFSLRNKDMKNAFRK

VLGKIVS*

>LoafORs33.17

MQINQTIVKEFTLIGFSLYPDAQILLFVVFFCLYLLTLRGNLTIMGLTWV

DRALHTPMYIFLSALSFSETCYTLSIIPKMLADLLAKKRSVLVLGCGIQM

YFFLGLGGTNCAILTLMGYDRFLAICNPLRYPLLMTHVLCGELVASAWAG

GFFVSLIETALIFRDFFCSPNLVKHFFCHMRAVVRLSCLDSNLTEFIVTL

ISVSGLLGTFLLIILSYVFILSTILQIPSAEGKQKAFSTCASHLTVVIIH

FGFASIVYLKPEGSRRDDTLIAVPYTVITPFLSPLIFSLRNKDMKNAFVK

VVGKIVS*

>LoafORs33.18

MQINQTIVKEFTLIGFSLYPDAQILLFVVFFCLYLLTLMGNLTIMSLTWV

DRALHTPMYIFLSALSFSETCYTLSIIPKMLADLLAKNRNISVIGCGLQM

YFFLGLGGTNCIILTVMGYDRFLAICNPLRYPLLMTHILCGELVASAWAG

GFFVSLIETALIFRDFFCSPNLVKHFFCHMRAVVRLSCLDSNLTEFVVTL

ISVLGLLGTFLFITLTYVFILSTVLRIPSAEGKQKAFSTCVSHLTVVIIH

FGFASIVYLKPEGSWGDDTLIAVPYTVITPFLGPLIFSLRNKDMKNAFRK

VVGKIVS*

>LoafORs33.19

MQINQTRVKEFILIGFSLYPDVQILLFVIFFCLYFLTILGNLTIMGLTWV

DRALHTPMYIFLSSLSFSETCYTLGIIPKMLADLLAKNRTISVIGCGLQM

YFFLGLGGTNCIILTVMGYDRFLAICNRLRYPLLMTHILCGELVASAWAG

GFFVSLIETALIFRDFFCSPNLVKHFFCHMRAVVRLSCLDSNLTEFMVTL

ISVLGLLGTFLFITLTYVFILSTVLRIPSAEGKQKAFSTCVSHLTVVIIH

FGFASIVYLKPEGSWGDDTLIAVPYTVITPFLGPLIFSLRNKDMKNAFRK

VVGKIIT*

>LoafORs33.20

MQTNQTIVKEFTLLGFSLYPDAQISLFAVFFCLYLLTLMGNLTIMSLTWV

DRALHTPMYIFLSALSFSETCYTLSIIPKMLADLLAKNRSISVIGCGLQM

YFFLGLAGTNCIILTLMGYDRFLAICKPLRYPLLMTNIVCGQLVASAWAG

GFFISLIETALIFRDFFCSSNLVKHFFCHMRAIVRLSCLDSNLTEFMVTL

ISESGLLGTFLLIILTYVFILSTVLRIPSAEGKQKAFSTCASHLTVVIIH

FSFASVVFLKPEGSRGDDTLIAVPYTVITPFLSPLIFSLRNKDMKNAFRK

VVGNIVS*

>LoafORs33.21

MGQTNITSWGGFVFLGFSSFGELQLLLFAIFLSLYLITLASNVFIIVVIR

LDSQLHTPMYLFLSYLSFSETCYTLGIIPRMLFGLALGDQAISYVGCAAQ

MFFSASWACTNCFLLAVMGFDRYVAICAPLHYASRMHPTFCAQLVGTSFL

SGYFFGLGMTLVIFHLRFCSSHEIQHFFCDTPPVLSLACGDAGLSELGIL

ILSLLVLLVSFSLITISYSYILAAVLKIPSAKGQKKAFSTCASHLTVVIV

HYGCASFMYLRPKASYCLERDQLIAVTYTVVTPLLSPIVYSLRNRAVKAA

LKNAFQRLVGKGSEGDQ*

>LoafORs33.22

MTNKNHTAVTEFVFTGFPHFQEGGLLFFILLVLIYLFIIIGNLMVFFAVK

LDSRLHTPMYFFISVLSFLEIWYTTTTIPKMLSNLVSEHRTISPAGCLLQ

MYFFHSLGITEVCLLTTMAMDRYLAICNPLRYPTIMTSQLYTQLTLGCCF

CGFFTPLPEIAWISTLPFCGPNQIRNIFCDFDPILNLACMDTGTIVLIKV

VDVVHAMEIITAVMLVALAYVRIIAVILCIHSADGRQKAFSTCASHLSIF

LIFFGSVALMYLRFSAKYSFFWNTAISLNFAVLSPFFNPIIYSLRNKEIQ

EAIKKHMCQLTLFIHHIK*

>LoafORs33.23

MDRPNQTTAWEFIFSVFPYSWGDSVLCFVPLLIIYTFIVVGNLVIITVVQ

LNTHLRTPMYLFISALSFLEIWYTTATIPKMLSSLLSERKSISLNGCLLQ

MYFFHSTGISEVCLLTAMAFDRYLAICSPLHYPTIMTPKLCAQLTLSCCV

CGFITPFPEIAWISTLPFCGTNHLEHIFCDFLPVLRLACTDTQAIVMIQV

VDIVHAVQIITAVILIVLSYVGIVAVILRIRSAEGRHKAFSTCVSHLTVF

LLFFVSVALMYLRFSATYSLFWDTAIALAFAVLSPFFNPIIYSLRNKEIK

EAIKKHMGQAKTFFHKTRNLK*

>LoafORs33.24

MENASLSTVTEFIFIGFPQLHEGGFLYFFPLLFIYIFIVTGNLMIFFAVR

IDIRLHNPMYNFISFFSFLEMWYATATIPKMLSNLISKQKTISFIGCLLQ

MYFFHSLGNTEGVLLTVMAIDRYIAICSPLHYPTIMTPRLCAQLSAGSCV

FGFLILLPEIVWISTLPFCGPNQIYQVFCDFSPLLSLACTDASVILVQDV

IHALAILTTVLIISLSYIRIIIVISGIPSVEGRKKAFSTCSAHIAVFLLF

FGSVGLMYLRFSATYTLFWDTAIALTFSVLAPFFNPIIYSLRNKDMKEAI

KKLLCSQKVFTISER*

>LoafORs33.25P

GLMYLRFSATYTLFWDTTIALTFSVLAPFFNPIIFSLRNKDMKEAIKKLL

CSQKVFNIFER

>LoafORs33.26P

VTEFIFTVFSWLQGGSLFYFFPLFFIYTFIVIDDLLILAVRLDNNLHNPM

YNFISIFSFLEIWYTTATIPNMLSNHISEQKSISITGCLLQMYFFHSLGN

SEGFLLITMSIDRYVAICNPLRYQMIMTHPPLPAPPLCAQVSAGSCIFGF

LILLPEIVIISTLPFCGPNQIRQIFCDVVPVLSLACIGT*KKMILTEDVI

HPMAIIIAVLIIFYLYIIITVILRIPSAEGWQKTFSTCSGHLTVFLIFFG

SVSLVYFCFNATYPPVLDTVIALKFTVLTPFFNSIIYNLRNKDMKDAIKK

LSCLQKVLNTS

>LoafORs33.27

MARSNQTTTVTEFLFSGFPQFEDGSLLFFIPLFFIYIFIVIGNLVVFFAV

RMDTRLHNPMYNFISIFSFLEIWYTTATIPKMLSNLISKQRTISMIGCLL

QMYFFHSLGNSEGILLTTMAIDRYVAICNPLHYPIIMTSRLCAQLSAGSC

IFGFLVLLPEIAWISTLPFCGPNQIHQIFCDFEPVLHLACTDTSMILVED

VIHAIAIIFSVLIIALSYIRIIIVILGIPSAEGRQKAFSTCAAHLGVFLM

FYGSVSLMYLRFSATFPPILDTTIALMFAVLAPFFNPIIYSLRNKDIKIA

IKKLLWPHKVFNASVS*

>LoafORs33.28

MDQENQTMVTKFYFSDFPQFENRGLLFFIPLLFIYVFIIVGNFMIFFAVR

LHTHLHNPMYNFISVFSFLEIWYTTVTIPKMLSNLVSEQKTISFIGCLLQ

MYFFHSLGVTEGLILTVMAIDRYVAICNPLRNAVIMTPQLCIQLSTGSCI

FGFLMLLPEIVWISTLPFCGPNQIHQLFCDFEPVLHLACTDTSMILVKDV

IHAISVLTSVSIITLSYLRIITVILKIPSGESCRRAFSTCAAHISVFLLF

FGSVTLMYLHFSVTFPPLLDKATALMFAVLAPLFNPIIYSLRNKDMKDAI

KKILCSQKMFNVSGS*

>LoafORs33.29

MISENQTMMTEFFFSLFPDPYEGGLLFFIPLLFTYGFIITGNLMIFIVIQ

LDVALHTPMYFFISVLSFLEIWYTTTTIPKMLCNLVSEQKSISRAGCLLQ

MYFFHSLGITEGCVLTAMAIDRYIAICSPLHYPTIMTPKLCIQLTAGCCL

CGFLLVLPETAWIATLPLCGSHQIQQIFCDFTPVLRLACTDTSLVVIMDA

IHAVEILASFLVITLSYIRIIVLILGMPSAEGRHKAFSTCAAHLAVFLLF

FGSVAAMYLRFSATYSVFWDTAITVTFVVLAPFLNPLIYSLRNEDMKDAI

GRLFYSQKRVGRWSSEIFLDQGDTEKPPGSSNFCCSLFSL*

>LoafORs33.30

MDQENQTMVTEFYFSDFPQFENRGLLFFIPLLFIYVFIIVGNFMIFFAVR

LDTRLHNPMYNFISVFSFLEIWYTTVTIPKMLSNLVSEQKTISFIGCLLQ

MYFFHSLGVTEGLILTVMAIDRYVAICNPLRYAVIMTPQLCIQLSTGSCI

FGFLMLLPETVWISTLPFCGPNQIHQLFCDFEPVLHLACTDTSMILVEDV

IHAISILTSVSIITLSYLRIITVILKIPSGESRQKAFSTCLAHITIFLLF

FGSVTLMYLHFSVTFPPLLDKAIALMFAVLAPLFNPVIYSLRNRDMKDAI

KKILCSQKMFNVPGS*

>LoafORs33.31

MISENQTMMTEFFFSMFPDLYEGGLLFFIPLLFTYGFIITGNLMIFIVIQ

LDVALHTPMYFFISVLSFLEIWYTTTTIPKMLSNLVSEQKSISWAGCLLQ

MYFFHSLGITEGCVLTAMAIDRYIAICSPLRYPTIMTPKLCIQLTAGCCL

CGFLLVLPETAWIATLPFCGSHQIQQIFCDFTPVLRLACTDTSLVVIMDA

IHAVEILASFLVITLSYIRIIVLILGMPSAEGRHKAFSTCAAHLVVFLLF

FGSVAVMYLRFSATYSVFWDTAIAVTFVVLAPFLNPLIYSLRNKDMKDAI

GRLFYSQKRVGGARRHI*

>LoafORs33.32

MDTGNWTQVIEFIIVGFPHLRGVQTYFFVLLLLIYLTTILGNLLIFLVVR

LDSRLHTPMYHFVSILSFLELGYTAATIPKMLANLLSEKKAISFSGCLLQ

IYFFHSLGATECYLLTAMAYDRYLAICQPLHYPTLMTPALCAKVVIGCWV

GGLAGSVVEISLVSRLPFCGPNHIQHIFCDFPPVLSLACTDTSINVLVDF

IINFCKILATFLLILTSYVQIIHTVLRIPSTAGKWKAFSTCASHLTVVFI

FYGSILFMYVRLKKSYSLDYDRALAVVYSVLTPVLNPFIYSLRNKEIKEA

MRRQLKRARILG*

>LoafORs33.33

MEQYNHSSLAEFVLLGFPNVGDVRGWLFVLLLLAYLFTVCGNLLIFLVIQ

LDATLRTPMYHFVSVLSFLELWYTATTIPKMLANLLSKKKTISFAGCLLQ

TYFFHSLGASECYLLTAMAYDRYLAICRPLHYPAIMTPTLCVKMAVSCWT

CGFLCPISEVILVSKLPFCGYNKIQHIFCDFPPLLFLACKNTSINVLVDF

FINAFIILITFLFIMVSYGRIIEAVLKIQTAGGRKKAFSTCTSHLIVVLI

FFGSIIFMYVRLKKSYSLTLDQTLAVVYSVLTPLANPVIYSLRNKELIKA

IKRTIFRKCGKAHPTHH*

>LoafORs33.34

MIDHANHTSTQDFILAGFATTGTLQPLIFLGTLCIYLLTLAGNLFIIVLV

QADSGLSTPMYFFINVLSFLELWYVSTTVSTLLHTLLHGCSPISSALCFI

QLYVFHSLGMTECYLLTVMALDRYLAICHPLHYHAFMSRQVQLWLAGTTW

VAGFSAALVPASLTATLPFCLREVAHYFCDLAPLMRLACVDTKWHAWVHI

VVIGLINACNLVLILGLYGGILRTVLNLPSAASRAKAFSTCSSHMTVVTL

FFGSAFIVYVGPPGIPAKGMDKLIALVYTLFTPFLNPIIYTLRNKEVKEA

VKRVIQRIKAVLKGP*

>LoafORs33.35

MMVHVNHTWTQNFILAGFTTTGTLQPLAFLGTLCIYLLTLAENLFIIVLV

QVDSGLSTPMYFFISVLSFLELWYVSTTVVTLLHTLLHRHSPISSALCFI

QLYVFHSLGMTECYLLSVMALDRYLAICLPLHYHALMSRQIQLWLAGATW

VAGFSAAIVPASLTATLPFCLKEVAHYFCDLAPLMQLACVDTGWHARANG

TVIGVATGCNFVLILGLYGGILKAVLKLPSAASRAKAFSTCSSHMTVVAL

FYGSAFTVYVSSSGSRPEGTDKLIALMYALLTPFLNPIVYTLRNKEVKEA

VKRVTDRLRTILKGS*

>LoafORs33.36P

DQANHTWTQSFILAGFTTTWTLQPLTFLATLCICLLTLAGNLFIIALVQK

DSGLFTPMCFFISVLSLLELWYVRPTVLMLLHTLLRRRSPISSALCFIQL

YVFHSLVMTECCLLGVMALDCYLATCLPLHYFALMNRQ/QLWLAGAILST

SLPANLTASLPFFLKEVAHYFWDLALLI*LTYVETGWHAQVHGTVIGVAT

EFNFVLILGLLWG/YGGILKALLKLPSAASCAKAFSTCSSHMTVVALFYG

SAFAVCVASPGG*PKGIDKLITLIYA*YILYNKEVKKFVKGVTDRIRSIL

K

>LoafORs33.37P

AGCATQMFFFITLAINNCFLLTAMGYDRYVAICNPLRYTVIMNKSVCAQL

VWGACSIGLLVAIIQISSVFRLHFCDREVAHYFCDIRPVMKLSCDDTTIH

DIINFIVSSLVIVVPMGLVFVSYILIISAILKIASAEGRKKAFATCVSHL

IVVIIHYGCASIAYLKPKSEDTKDQDQLISVTYTVFTPLLNPVVYTLRNK

EVRDALHHVLAKK

>LoafORs33.38P

LFHCCLNASPFPSSSLFRPRPPSVPKANSTLVIEFLFEGFSSFGWQHRIV

FFVVFLTLYLLTVSGNVIIVTIIHLDRHLHTPMYFFLSMLSISETCYTVA

IIPRMLSDLLSPHQCIAIQECATQHFFYLTFGINNCFLLTAMGYDRYVAI

CNPLRYSIIMGKRSCVHLASGSLGIGLSMAIIQVTSVFGRPFCDDFVVSH

FFCDVRPLLKLACADTTVNEIINFVVRVCVLVLPMGLVFISYVLIISTIL

KIASAEGRKKAFATCASHLTVVIIHYGCASIIYLKPKSQSSLGQDRLISV

MYTVITPLLNPVVYSLRNKEVKDALCRAVGGK

>LoafORs33.39

MDAPPLTAGLGPRYLIHCWLITSPFPLSSSFRPRPSSVPKANSTVTEFLF

EGFSSFGWQHRIVFFVVFLTLYLLALSGNVIIVTIIRLDHHLHTPMYFFL

SILSISETCYTVAIIPRMLSDLLSPHQCIATQGCATQLFFYLTFGINDCF

LLIVMGYDRYVAICNPLRYSIIMSKRSCVYLASGSLGIGLSMAIVQVTSV

FGLPFCDAFIISHFFCDVRPLLKLACTDTTVNEIINFVVSVCVLILPMGL

VFISYVLIISTILKIASAEGRKKAFATCASHLTVVIIHYGCTSIIYLKPK

SQSSLGQDRLISVIYTVITPLLNPVVYSLRNKEVKDALCRAVGGKLPL*

>LoafORs33.40

MKTANHTEVREFVFQGFSNFQEHQLTLFVVFLTLYMLTLAGNVIIVTIIR

IDHHLHTPMYFFLSVLSTSETFYSLVIIPRMLSSLACLSQSISLEGCGTQ

LFFFLGFAITNCLLLAVMGYDHYVAICNPLRYSIIMNWRVCAMLSSLVCA

TGFSLSLVQAVAIFRLPFCDSLIEHFFCDVRPVLDVACATPIINDILTLI

ISLLAITVPATFLFISYILIISTILKIASTEGRKKTFATCASHLTVVIIH

YGCASIAYFKPKSENTKDQNQLIAVTYTVITPLLNPVVYSLRNKEVQDSL

HRVMGRKSLS*

>LoafORs33.41P

IPRMLFNLIGLSQPISLAGCATQMFFFITLAINNCFLITAMGYDRYVAIC

NPLRYSIIMNKKICVQLVWRACSIGLIVAMTQVLSVFRLPFCSTKVAHFF

CDIQPVMKLSCTDTTFNEILTLIISVLVILVPMGLVFISYILIISTILKI

ASAEGRKKAFATCASHITVVIVHYGCTSIAYLKPKSENTRDQDQLISVTY

TVITPLPNPVVYTLRNKEVKDALCRSIGRKF

>LoafORs33.42T

QVSSVFSLPFCNANIISHFFCDIRPLMKLACADTTIKEFITLLISLCVLV

LPMVLIFISYVLIVTTILKIASAEGRKKAFATCASHLTVVTVHYGCTSFI

YLKPKPHNSLQDRLISVTYTVITPLLNPVVYSLRNKEVKDALLRALGRKS

LS*

>LoafORs33.43

MKRENHTFILEFVFQGFSRFCEHQLTLFLVFLTLYILTLAGNIIIVTIIQ

IDPHLHTPMYFFLGMLSTSETVYTLVILPRMLSSLVGMSQSISLAGCATL

MFFFVTFGITNCFLLTAMGYNRYVATCNPLRYTVSMNKRMCAQLVWGACS

IGMIVAMTQVTSVFRLPFCATKVAHFFCDIRPVMKLSCIDTTINEILTFI

ISILVLVVPMGLVFISYVLIISTILKIASVEGQKKAFATCASHLTVVIVH

YGCVSIAYLKPKSENTRDQDHLISVTYTVITPLLNPVVYTLRNKEVKDAL

CRAIGRKFF*

>LoafORs33.44

MHRKNFTEVTEFIFLGFSSSGKHQITLFVVFLIIYILTLASNIIIVTVIC

TDHHLHTPMYFYLSMLASSETVYTLAIVPRMLSSLIFHKQPISLAGCATQ

MFFFVIMATNNCFLLTAMGYDRYVAICKPLRYTVIMSKGMCAQLVCGSFG

TGLVMALLHVTAMFNLPFCGTVVEHFFCDIYPVMKLSCIDTTVNEIINYS

VSSFVIFIPVCLNFISYVLIISSILKIASAEGRKKVFTTCASHLTVVIVH

YGCASIAYLKPKSENSVEKDLLLSVTYIIITPLLNPVIYTLRNKEVTDAL

RRAVGKNVPYHIESFFSGDL*

>LoafORs33.45P

MQRKNLSEVAEFIFLGFSSFHEHQITLFVVFLILYTLTLSGNAITLTIIH

IDRHHHTPMYFFLSMPASSETMYTLVIIPQMLSSLIAQNQPISLAGCTTQ

MFFFITLAINNCFLLTVIGYDRYVAICNPLRYTVIVSKRVYVQLICGAFD

IGLVMAVVQVTSIFT*PFCHRLVGHFFCDILPVMKLSRIDTTINEIISYL

VNLFVILAPRGLFFISYVFIISTVLKIASSEGQKKAFAACASHLFVVIVH

CGCASIA*SKPKSENSVEEDLLLSVTYTIITTLLNPVVYSLRNKEVKDAL

HRAVGRNIS*YVGPFYKG

>LoafORs34.1

MLMLLEQNQSWVSEFILLGFSSDPTSNRILFIAFLLLYLSAILGNGLIVT

LICLDSHLHTPMYFFLCILSLLDMGYVTTTMPQMLVHLLAYSRTISFAGC

WLQMYMFGALGLTECIFFVVMAYDRYVAICYPLRYTVILSWDLCTQLAAG

SWTCGFFFSLIHTFLTMRLPYCGPNVVNHYFCEGPSVRSLACMDTHLIEM

VDQVITVFVIVTPLSLILASYIHIALAILKIKSTRGRCKAFSTCASHLTV

VTLLYTPATYIYMKPKSNYSPERDKRISLLYNVFAAILNPVVYSLRNKDI

KGAFLKVMERGRVTW*

>LoafORs34.2

MSMPPEQNQSWVSEFILLGFSSHPTSNRILFIAFLLLYLSAILGNGLIIT

LICLDSHLHTPMYFFLCILSLLDVGYVTTIMPQMLVHLLSHSQTISLAGC

WLQMYVFGALGLTECIFFVVMAYDRYVAICYPLHYTVILSRRVCTRLAAG

TWACGFFFSLIHTFLTMRLPYCGPNIINHYFCEGPSVRSLACMDTYLTEM

VDLVISVFVNVTPSCLILASYIRIALAILKIKSTRGRCKAFSTCAFHLTV

ATLFYAPATYIYLRPNSSYSRERDKQIALFYNVFTPLLNPIVYSLRNKDI

KGAFFKVIGRGRVVW*

>LoafORs34.3P

MQDFTWENHSSVSEFILLGFSRDSQINAILFSIFLFLYLSTLVGNGLIVT

LIQLDSNLHTPMYFFLSVLSMLDMSYITTTVPQMLVHLVCQKKTITYVGC

VAQMYIFLVLGITEGWLFSVMSYDRYVAICHPLRYKVIMSPWLCGAMVVF

CGLWGVSCSLIYTVFTMHLPYCGLNEINHFFCEVPAVLKLACTGTSLNDR

>LoafORs34.4

MQSRGWRNHSSVTEFILLGFSRNPRTNWILFFIFLFLYLFTVLGNGFIVT

LIRVDVRLHTPTYFFLSILSLLDLSYATTTVPQMLVHLVSKNKTISYIGC

VVQMYFFLTLGITETWIFPAMAYGRYVAICYPLYCGVQMSQTLCILLAVS

SALCGITCALVYTVFATNLPYCGRNEINHFFCEIPAVLKLACADTSLNDQ

VDFILGFILLLIPLALILASYIRIFMAILRIRSTQGQIKAFSTCASHITV

VTMFYIPCMVMYVRPGSKAFPEDDKKLALFYNVISAFLNPIIYSLRNNNV

KRAFLRLIGMTEGTQ*

>LoafORs34.5

MQEPNQSSVTEFILLGFSLSPRTTPLVFSAFLITYVLIILGNGLITILIC

LDSHLHTPMYFFIGILSMLDLGYTTTTVPQMLTHLASQKKTISFASCVAQ

MYIFLVLGITESWLFAIMSIDRYVAICHPLRYKVIMSPWLCGIMVIFCGL

WGVISALIYTVFAMHLPYCGTNKINHFFCEVPAVLKLACADTSVNDRVDF

ILGFSVILVPLSLILVIYVNIFIAILRIRSPQGRLKAFSTCASHITVVTM

FSVPAMVMYMRPSCMASPEEDKKLALFYNIISAFLNPIIYSLRNKDVKRA

FLKVTGWSRASD*

>LoafORs34.6

MQSLGKDNHNNVSEFILLGFSSESQVRMALFTFFLLLYLTTLLGNGLILT

LIYSDSRLHTPMYFFLSILSLVDMSYVTTTVPQMLVNMVCPRRTISWGAC

VAQMFIFLVLGIAECVLYAIMAYDRYVAICFPLHYTLHMSHPTCIKMVTV

CWSISITGALIYTVFTMRLPYCGPHKINHFFCEVPAVLKLACADTSLNDH

LDFVLGFILLLVPLSLILASYVHIFASILRIRSSQGRLKSFSTCASHITV

VTTFYGPAMVMYMKPGSWYDPEQDKKLALFYNVVPAFLNPIIYSLRNKDV

KGVFLKVLGDRRTAQ*

>LoafORs34.7

MQELNQSTVTEFILLGFAPGPRTDPLLFTFFLVFYLLILMSNSLLITLIY

QDLRLHTPMYFFIGVLSMLDMCYTTTTVPQMLVHILSKERAISFARCVAQ

MYIFLLFGVTESWLFSIMSVDRYMAICHPLRYKVIMSHWMCLLMVGICAA

YGVVGGLSYTFFAMRLPYCGPKEIDHYFCEVPAVLKLACADTSLNDLVDF

ITGFNVIVVPLSLVVIVYANIFATITKIRSAQGRIRAFSTCASHITVVTM

FAIPCIIMYMGPGSGSLSNSGKRLALFYNVATAFLNPVIYSLRNKDVKKA

FLKLMGQDRASE*

>LoafORs34.8

MQDFFWGNHSSLTQFILLGFSSNTKTNVILFSIFLFLYLITLLGNGLIII

LIRMDSHLHTPMYFFLSVLSILDMGYVTTTVPQMLVHLVCQKKIISYIGC

VAQMYIFLMLGITESWLFAIMTYDRYVAICHPLRYKVIMSALLCGLMVAF

CGFWGISCALIYTVSTMILPYGGPNEINHFFCEVPAVLKLACADTSLNDR

VDFILGFLLLLAPLSLIIIVYINIFAAILRIRSAQGQLKAFSTCASHITV

VTMFSVPCMVMYMRPGSAASPEEDKKLALFYNVISAFLNPIIYSLRNKDV

KWAFLKVTGWGKVPE*

>LoafORs35.1P

MAYENFTGVTEFILL*LTERSDLKVVLFMLFWLIYIISLVGNLGMLVLIQ

ITPKLHTSMYHFLSCLSLVDASYLSVFAPKMLLNFFAEQETISFSACIVQ

YFLFVSLITTQGFLLAAMAYDHYVAIVHPLTYTVTMTKILCVVLVIGSCV

GGLMNLLTHTIGLSKLSFCGPNVISHFFRDLPPLLKLSCSDTPMNELLLL

ISSGVIAMITFLTVIISYIFIVAAILKIHSTAGRHKAFSTCASHLTAMTL

FYGSISFNYIRPSSQYSLEQEKMVSVFYTLVMPMLNPLIYSLRNKEVKDA

VKRAIEMKHFPCCIHNTHFSK

>LoafORs35.2P

LAGWNHTGVKEFLLVGLTENPNLQIPLFLLFALIYYITLVGNWGMIVLIW

LSVRLHTPMYFFLSNLSFCDICYSTVFAPKMLVNFLLERKSSTFSGCVLQ

SFFFAVYATTEGILLPMMAYDHYVVIANPLLYRVIMTQRVCIQMVLVSYL

GELINSLTHTIGLLKLDFCGPNIVNRYFCDIPSLLRLSCSDSHTNKMLLL

IFSGVIAMFSFIIIMVSYVYIIIAIQRIHPAEGRHKAFSTWASHLTAVTL

FYGSVTFSYVQPSSQYSLEQEKVSAVFYTLVIPML

>LoafORs40.1P

MKTENQTFGAEFILLGFFQYGQMNTVLFVTIAGLFSVALMGNIILIHLI*

LDTLLHTPMYFLLSQLSFIDMMYLSTTVPKMAANFLSNDKTITFLGCKIQ

TFVVLTLGGTEALL

>LoafORs44.1P

MEWRNRTFSPDFILLGIFHHIATHIFLFFLVLGIFAAALLRNTTMVLLIY

LNT*LHTPMYFLLSRPSLMDLMLICTTVPKMVYN/YLSGWNSISVADCEA

QIFFYMSLSGAKCFLWLSRPMTSMLPFAILFNTPIS*ARKFVNLWLPLPG

SLPPLMELLMYHLFYPSYIVAPEKYPVLL*CCDVSALLSLLYTDTLTFET

FVFICCVLMFLFLLLLVIVSYSFVTMAVIPMSSQEDWHKTSKICTSHLIV

VGMYYGPAMFIYI/PNSRKMMSAFYTILTPTFNLLIYRLRNKGVARAFTK

VLTKPKPNSLQP

>LoafORs45.1

MSHWPERNWTNPKEFVILGFSGWPQGLQVLLFALLLPLYLATLAGNLLIL

GLAVMDSALHTPMYFFLGSLSAVEVAYTLVLTPRMLAGFLLPPGGQAVAA

STCAAQMGLFVALGGSECLLLAAMALDRYLAICWPLYYPQLMTSGLCWCL

LASCCVGGSILALSLTTAIFQLPFCHGGLVNHVFCDLPAVLVLACGNRDL

QEHVLLAACLLLLVLPLVLILLSYTRVLLVILGLGGAEGRQKAFNTVASH

LTVAVLHYGCATAMYARPLHSRSLEEDKLISLIYINLTPLLYPAIYTLRN

RDMQGALQRVAGQSTPGSVHQADLT*

>LoafORs46.1P

CQSNIFY*PLFVTEFFLLAAMSYDCYVAICKPLHYVTIMNSTVCRRLVFC

CWAAGLFIIIIIIPPLILDLNLEYCN

>LoafORs46.2P

LDGIFSFGIL*YSKSPNVSFWHIFLYVIILMGNGIIIRITRVDKTLQTPM

YFFLANFSFLEICYVSTTIPKMLMNLWTQQRNISLFECATQMCFFLIFGG

TECLLLAVMAYDRYVAISNPLHYPLVMKRRVCIQLVTCSWITGIPVPIGQ

MYQTYSLPFCGSNQINLFFCGMPQVFTLACGDTFPNEMLVYIVVVLFVTV

PFLLILGSYGKIISTILKLPSATSRAKAFSTCSSHLIVVTLFFGSGFTTY

FQPKSKHSSERDRFLSLFYTILVPVFNPMIHTLRNKDVMVALKKLLP

>LoafORs46.3P

MQPRKANPQIENELKMTETSITTNDGIRSVRIF*YSQIPLVSFWRILSHL

YDYSYVTS*S**QE*IPNFRLPCIFV*AIFPS*KSVVCHLC*NAHGSLDP

EGNFFFFFARATQMCFVLMLGVTECLLLVAMAYDCYVAICNPLHYPVETL

VA*WLSAMATNQKVGRSNPPGASWKLYGTVLLCPIGSL*VRIDSTATGFF

FFFFGTIVLVMN*EICVQLVAEPWISGFPLRWGKWDRFSLCPFVVLTKSV

TSSVTIPQSSSWPVETSSSMRWWSIYLLLVFVTVPFVLIL*PYSRIISTI

FKLPSNTGWTKAFSICSSHLIVVVLFYVSATITYLKPKCNQYEETDKLLS

FLY

>LoafORs46.4P

MLFKNVSELTSVNLSNPRWKAR*KQKSLITPRLRSLFPWGLLIHPISWIL

FGIFFVIYLIILLNNSILILITRIDPTIQNPMYLSIGNVSVLEICSVTPT

VPRMLREFWTQEGNFSLLAC/AMEMSFVLIFGDTGSLSLTVMAYEPYVAI

CNPLHYPVVMKHRVCN*LVAGSWVSGIPVEIGQTCQIFSLYFCRSKTINH

FFCDIPSILKLVCGDTFANEMAVYIVAVVFFMVPFLLIIASCGKIISNIL

KLPSARGWAKAFSTCSSHLTVVVLFYGTAAINYLQPKSNQSEEWGKLLSL

FYTILTSMMNPVIYSLRNKDVMVALKRVLPKLLT

>LoafORs46.5P

MKHQENLAEVNHTSAVEFFLLEFSDIPNLQMLLFGFFFLAYVII**EMAS

LFSLPG*IKSADSQVFFLSNFSFLEICYVSTTIPNMLVNIWTQQRNISLF

ECATQMCFFLTLGDTECLLLAVTAYDRYVAISNPLHYNHESQDLYPVRDW

LLDHWNPSLDRADI*DFLTAICGSNQINHFFCDIPPLFKLARRDAFVNKT

LVYVVAVLFITVPFLSILGSYSKIISTILKLPSATSQAKAFSTCSSHLMV

PVLFFGSGIITYFQPKSQQSSGRDRFLSLFCTIVVPMLNPMIYTLRNKDV

MVALRNCYP

>LoafORs46.6

MNRQEKPPDENLTELLDFVLLGFADMPHLRWFLFGLFLVIYIIILMSNGT

IFLITKMDPALQSPMYFFLANFSFSEICFVSATLPRMLMNLGTQRRRISL

VACATQMCFGLIFGVAECLLLAVMSYDRYVAICNPLNYPLVMNHRVCIQL

VTGSWTVGIPFLIEYTYQTFSLPFCGSNQIDHFFCDVFPILKLACGDTFV

NEMLVYTVAVLFVMVPFLLILGSYSKIISIILKLPSVTSQAKAFSTCSSH

LMVVVLFFGSAIITYLRPNTRHSDGTDKVLSLFYTILMPKFNPMIYSLRN

KEVIIALRKLLCK*

>LoafORs46.7

MNRQEKPPDENLTELLDFVLLGFADMPHLRWFLFGLFLVIYIIILMSNGT

IFLITKMDPALQSPMYFFLANFSFSEICFVSATLPRMLMNLGTQRRRISL

VACATQMCFGLIFGVAECLLLAVMSYDRYVAICNPLNYPLVMNHRVCIQL

VTGSWTVGIPFLIEYTYQTFSLPFCGSNQIDHFFCDVFPILKLACGDTFV

NEMLVYTVAVLFVMVPFLLILGSYSKIISIILKLSSVTSQAKAFSTCSSH

LMVVVLFFGSAIITYLRPNTRHSDGTDKVLSLFYTILTPMFNPMIYSLRN

KDVIIALRKYLCK*

>LoafORs47.1

MREENQSSTLGFILLGITGQQQQEDIFFILLLFIYPSTLIGNLLIILAIL

SDVRLHNPMYFFLANLSFVDILFSSVTVPKMLANHLLGSKAISFGECLTQ

MYFMIALANTDSYILAVMAYDRAIAISCPLHYTTIISPRSCFLLVVGSWM

IANANTLPHILLTASLSFCGIQEVANFYCDISSLLKLSCSDIRFNVKMMY

LGVGVFCVPLICIISSYIWVFSIVLRVPSTKGMLKAFSTCGSHLTVVSLY

YGTVMGMYFRPLTSYNLKDSVITVMYTAVTPMLNPFIYSLRNRDMKAALG

KLFSKRISS*

>LoafORs47.2P

MREENQSSTLDFILLGISSQQ*QENVFFILFLFIYPSTLIGNWLTILAIH

SDVCLHNPMYFFLANLSFVDILSSSVTGPKMLANHLLGSKAISLGGCLT*

MYFMSAFTNTDSYILAVMAYHHAIAISRPLHYTIIITPRSCFRVLGDCKC

QYPPPHSAHI*SVLQWELESGKILL*HFLSLKLSCSDTHFNVKMLYLRTG

VFYVPLICIIISYIQVFSIVLQVPSTKGVLKAFSTCGSHLTVVSLYYGTV

MGMYICALTSYSLKNAVITLMGTAETPMLNPFIYSLRKRDMQAALGKLFS

KRTSS

>LoafORs47.3

MRDGNQSSTLGFILLGITGQQQQEDVFFILFLFIYPSTLIGNLLIILAIH

SDIRLHNPMYFFLANLSFVDILFSSVTVPKMITNHLLGSKAISFGECLTQ

MYFMIALAATDSYILAVMAYDRAVAISRPLHYTIFISPRSCFLLVVGSWV

IANASTLPHILLTASLSFCGKQEVANFYCDISSLLKLSCSDIHFNVKMMY

LGVGVFSVPLICIIISYIRIFSIVLHVPSTKGMLKAFSTCGSHLTVVSLY

YGTVMGMYFRPLTSYSLKDAVITVMYTAVTPMLNPFIYSLRNRDMKAALG

KLFSKRISS*

>LoafORs47.4P

MKEGNQSSILGFILLGITGQQQQEDIFFILFLFIYPSALIGNLLIILAIH

SDIHLHNPMYFFLANLSFVDILLSSVTVPKMLANHLLCSKTISFEECLTQ

MHFMIAFGTTDSYILAVMAYDCAIAIRRPLHYTAIISPRSCVLFVVGS*V

AGNANALSDTLLTASLSFCGNREVANFYCDITPLLKLSCSDIHFNTKMMY

LGVGVFCVPLICIVISYIQVFSTVLRVPSTKGVLKAFSTCGSHLTVVSLY

YGTVMGMYFRPLTSYSLKDAVITVMYTAVTPMLNPFIYSLRNRDMKAALG

KLFSKRISS

>LoafORs47.5P

PFLICNHP*DAGKPPFGGCLTQMYFMIALANTDSYILAAMAYDRAVAISR

PLHYTTIMSPKFCILLVVGSWVIANANALPHTLLTASLSFCGNQEVANFY

CDITPLLKLSYSDTHLNVKMMYLGVGVFCVPLICIIISYILVFSVVLCVP

STKDILKAFSTCGSHLTVVSLYYGTVMGMYFCPLTSDSLKDAVITVMYTA

VTPMLNPFIYSLRNRDTKGALGKLFSKRISS

>LoafORs47.6

MREENQSSILGFILLGITDQQQQEDIFFILFLFIYPSTLIGNLLIILAIH

SDIRLHNPMYFFLANLSFVDILFSSVTVPKMLANHLLGSKAISFEGCLTQ

MYFMIALANTDSYILAVMAYDLAVAISRPLHYTTIISPRSCVLLVVVSWV

IANANALPHTLLTSSLSFCGNQEVANFYCDTSFLLKLSCSDIHFNVKIMY

LGISVFCVPLICIITSYIRVFSVVLCVPSTKGILKAFSTCGSHLTVVSLY

YGTVIGMYFRPLTRYSLKDAVITVMYTAVTPMLNPFIYSLRNRDMKAALG

KLLGKRISS*

>LoafORs47.7P

NQSSTLGFILLGISRQQQQENVFFILFLFIYPSTLIGNLVIILAIHSDIR

LHNPMYFFLANLFFVEILFLSVTVSKMLANHLLAIKIISFGGCLT*MYFM

SALANTDSYILAVMAYDRAVAISRPLHYTIIISPRSCVLLVVGSWLVGNA

NVLPHTVLTASLSFCGNQKAANFYCDITPLLKLSCSNIHFDVKMMFFRGW

CFLCAINMHHYLLYSGLFYCATGSIHKGCAQSFLYLWSHLTVVSLYYGTV

KGIYFHPLMSYRLKDAVITVVYTAVTPMLNPFIYSLRKRDMKAALGKLFG

KRICS

>LoafORs47.8P

LLSACCWVLGDCKCQYPPHILLTSSLSFCGNQEVANFYCDIPSLLKLSCS

DIHFNVKMLYLATGVFCLPLIFIIMSYIRVFSIVLCVPSTKGILKAFSTC

GSHLTVVSLYYGTVMGIYVRPLISYSLKNAVITMMYTAVTPMLSPFIYSL

RNRDMKAALRKLFSKRISS

>LoafORs47.9

MREGNQSCTLGFILLGITGQQQQEDVFFILLLFIYPSTLIGNLLIILAIR

SDIRLHNPMYFFLANLSLVDILFSSVTVPKMLANHLVGSKAISFEECLTQ

MYFVIALATTDSYILAVMAYDRVVAISRPLHYTIFISPRSCFLLVVGSWV

IANASALPHILLTPSLSFCGNQEVANFYCDISSLLKLSCSDIHFNVKMMY

VGVGVFCVPLICIIISYIWVFSIVLHVPSTKGVLKAFSTCGSHLTVVSLY

YGTVMGMYVRPLTSYSLKDAVITVMYTAVTPMLNPFIYSLRNRDMKAALG

KLFSK*

>LoafORs47.10

MKEGNQSSTLGFILLGITGQQQQEDVFFILFLFIYPSTLIGNLLIILAIH

SDIRLHNPMYFFLANLSFVDILFSSVTVPKMLANHLLGSKTISFEECLTQ

MYFMIALATTDSYILAVMAYDRVVAISCPLHYTIFISPRSCFLLVVGSWV

IANASALPNVLLTSSLSFCGNQEVANFYCDISSLLKLSCSDIHFNVQMMH

IGVGVFCVPLMCIIISYVLVFSIVLRVPSTKGVLKAFSTCGSHFTVVSLY

YGTVMGVYFCPLTSYSQKDAVITVMYTAVTPMLNPFIYSMRNQDMKAALR

KLFSKRISS*

>LoafORs47.11

MREENQSSVLNFILLGITSQQEQEDAFFILFLFIYPITLIGNLLIVLAIC

SDVRLHNPMYFFLANLSFVDILFSSVTIPKMLANHLVGSKAISFGGCITQ

MYFMIALGNTDSYILSVMAYDRAVAISRPLHYTTIMSPKFCILLVVGSWV

VANANTLPHVLLTASLSFCGNREVANFYCDISSLLKLSCSDIHFNVEMMY

LGVGVFCVPLICIIISYIRVFATVLRVPSTKGVLKAFSTCGSHLTVVSLY

YGTVMGMYFRPLTSHSLKDAVITVMYTAVTPMLNPFIYSLRNRDMKAALG

KLFSKRISS*

>LoafORs47.12

MLQTVREMDGDNQTGASKFLLAGLSEKPEQQRILFWMFLSMYLVTVVGNV

LIILAISSDSRLHTPMYFFLANLSFTDLFFVTNTIPKMLVNLQSQNKAIS

YTGCLTQLYFLVSLVALDNLILAAMAYDRYVAICHPLHYTTAMSPGLCIL

LLALCWVFSVLYGLIHTLLMTRVTFCESRKIHYIFCEMYVLLRLACSSTQ

VNHTMLIVTGCLIFVVPFGFMIVSYIWIVRAILQIPSTFRKYKAFSTCAS

HVAVVSLFYGTLCMVYLQPLHTYSMKDSVATVMYAVITPMMNPFIYSLRN

KDMHGALGKLFLGKAFQRLT*

>LoafORs47.13

MLVLQTTGEMDGDNQTEASKFLLVGLSEKPDQQRILFWMFLSMYLVTVMG

NVLIILAISSDSCLHTPMYIFLVNLSFTDLFFVTNTIPKMLVNLQSQNKA

ISYAGCLTQLYFLISLVTLNNLILAAMAYDRYVAICHPLYYTTVMSPGLC

ILILALCWVLSVLYGLILTLPMTRVTFCGSQKIHYIFCEMYVLLSLACSN

TQVNHTVLVTTGCFIFLTPCGLMIVSYVQIVRAILQITSVTGKYKAFSTC

ASHLAVVSLFYGTLGMVYLQPLHTYSMKDSVATVMYAVVTPMMNPFIYSL

RNKDMHGALRKLFLGKVFQGLT*

>LoafORs47.14P

RNQTTVSELLLWGLPIEPDWQNLFYILFLVMYLATILGNLLIIVLIRLVF

HLHTPMYLFLSNLFFSDFCFSSVTMPKLLQNLQSQVTFIPYAGCLLQMYF

YLFFF*VLESFLFVVMPYDHYVVICFPLHYTTTMSPRLCLCLLALSWLLT

TAHAMLHTLLMARLSFCTDNVIPHFFCDEACLL/LALTVRSMDR*FFFFM

GGLILVIPFLLIIMSCA*IVSCIIKVPSPGGIRKAFSICGSRLSVVSLFY

ETIIGLYLCPSKDHSTVKKTVMGMMYTVVIPMLNPFIYSLRNRDMKGALG

RVFCKRRVSFAL

>LoafORs47.15

MGKENWSSVSAFFLLGFSKQKEQQEVLFGLFLSMYLVTVASNLLIILAII

SDAHLHTPMYFFLANLSLADACFVSTTVPKMLANIWTQSQVISYAECLSQ

LYFFMLFVMLEVFLLAVMAFDRFVAICHPLHYIMVMSPGLCVLLVIASWI

MNALHSLLHTLLMNSLSFCADHEIPHFFCDINPLLSLSCTDPFINELVIF

TLGGLAGLGYILCLIISYAYIFSTILKIPSAQGKQKAFSTCSSHLSVVCL

FFGSSCCVYFSPPSTRSAQKATAASVMYTVVTPMLNPFIYSLRNQDIKSS

LRKLIWVRKIHSF*

>LoafORs47.16

MREDNQSSTLNFILLGITSQQEQECVVFILFLFIYPITLLGNLLIILTIL

SDVHLHNPMYFFLANLSFVDILFSSVTIPKMLANHLVGSKAISFGRCLTQ

MYFMIALGNTDSYILAAMAYDRSVAISRPLHYTTIMSPKFCILLVVGSWV

IANANALPHTLLTASLSFRGNQEVANFYCDITPLLKLSCSDTHLNVKMMY

LGVGVFCVPLICITISYIRVSSTVLQVPSTKGVLKAFSTCGSHLTVVSLY

YGTVMGTYFRPLTSYSLKDAVITVMYVAVTPMLNPFIYSLRNRDMKGALG

KLFSKRISS*

>LoafORs47.17

MKEENQSSILGFILLGITDQQQQEDIFFILFLFIYPSTLIGNLLIILAIH

SNIFLHNPMYFFLANLSFVDILFSSVAVPKMLANHLLGSKDISFKGCLTQ

MYFMVALADTDSYILPVMAYDRAMAINHPLHYTTIISPRSCVLLVVGSWV

IANANALLHTVLTASLSFCGNREVANFYCDTSFLLKLSCSDIHFNVKMMY

LGIGVFCVPLICIMISYIRVFSVVLCVPSNKGILKAFSTCGSHLTVVSLY

YGTVMGMYFRPLTSYSLKDAVITVMYTAVTPMLNPFIYSLRNRDMKAALG

KLLGKRISS*

>LoafORs47.18

MREENQSSTLGFILLGISRQQQQENLFFILFLFIYPSTLIGNLLIILAIH

SDVRLHNPMYFFLANLSFVDILFSSVTVPKMLANHLLGIKVISFGGCLTQ

MYFMSALANTDSYILAVMAYDRVVAISRPLHYTVIISPRSCFLLVVGSWV

IANANTLPHILLTSSLSFCGNQEVANFYCDIPSLLKLSCSDIHFNVKMLY

LATGVFCLPLIFIIMSYIRVFSIVLCVPSTKGILKAFSTCGSHLTVVSLY

YGTVMGIYVRPLISYSLKNAVITMMYTAVTPMLNPFIYSLRNRDMKAALG

KLFSKRISS*

>LoafORs47.19

MEEGNQSSTLGFILLGITGQQQQEDVFFILFLFIYPSTLIGNLLIILAIH

SDIRLHNPMYFFLANLSFVDILFSSASVPKMLAKHLLGSKAISFEECLTQ

MYFMIALATTDSYILAVMAYDRVVAISCPLHYTIFISPRSCFLLLVGSWV

IANASTLPHILLTPSLSFCGNQEVANFYCDISSLLKLSCSDIHFNVKMMS

VGVGVFCVPLICIIISYIRVFSIVLHVPSTKGVLKVFSTCGFHLTVVSLY

YGTVMGMYVRPLTSYSLKDAVITVMYTAVTPMLNPFIYSVRNLDMKAALG

KLFIKRISS*

>LoafORs47.20

MRKENQSSVLNFILLGITSQQEQEDAFFILFLFIYPITLIGNLLIILAIR

SDVRLHNPMYFFLANLSLVDILFSSVTIPKMLANHLVGSKAISFGGCITQ

MYFMLALGNTDSYILAAMAYDRAVAISRPLHYTTIMSPKFCILLVVGSWV

IANVNTLPHVLLTASLSFCGNREVANFYCDISSLLKLSCSDTHFNVEMMY

LGVGVFCVPLICIIISYIRVFATVLRVPSTKGVLKAFSTCGSHLTVVSLY

YGTVMGMYFHPPTSHSLKDAVITVMYTAVTPMLNPFIYSLRNRDMKATLG

KLFSKRISS*

>LoafORs47.21P

MAGGNQTNIFEFLLWGLSERPEQQRILFLLFLWMYVVTFAGTLLIVLAIG

TDTVLHNPVYFFLASLSCADILFISTTVPKALVNIQTQSRSISYAGCMAQ

LYFFLTFGDMDIFLLATMAYDR*VAICHPLHYTIIMSSWRCTLLVTVCWI

LTNLVAMTHTFLIFRLPFCSKKVIPDFFCDLGPLMKVSCSDTQVNELVLL

FLGGAVILIPFMLILVSYIHIVSAILRVPSAQGRCRAFSTCGSHLAVVAL

FFGTVIRAYLCPSSSSSNSVEEDTAAAVMYTVVTPLLNPFIYSLRSKDMK

GALRRLLRGKAFF

>LoafORs47.22

MDEDNQTSASEFLLVGLSEKPEQQRILFWMFLSMYLVTVVGNVLIILAIS

SDSRLHTPMYFFLANLSFTDLFFVTNTIPKMLVNLQSKNKAISYAGCLMQ

LYFLISLVALDNLILAAMAYDRYVAICRPLYYTTAMSPGLCILLLALCWV

FSLLYGLIHTLLMTRVTFCGFRKIRYIFCEMYVLLRLACSNIQANHTVLI

ATGCFIFLTPFGFMIVSYARTVRAILRIPSVTGKYKAFSTCASHLAVVSL

FYGTLGMVYLQPLHTYSVKDSVATVMYAVVTPMMNPFIYSLRNKDMHEAL

GKLFLGRAFQKLT*

>LoafORs47.23

MESEAGTNRTALTEFIFLGLVESEKLQSVIFVLFLFAYLATVGGNLSILA

AILVEPKLHTPMYFFLGNLSVLDVGCSTVTVPPILGRLLSDKRTISYDAC

LSQLFFFHLLAGMDCFLLTAMAYDRFLAICRPLTYSIRMSQEVQRLLVAV

SWACAFTNAMTHTIALSTLNFCGPNEVNHFYCDLPQLFQLSCSSTQLNEL

LLFAVGFIMAGTPVVLIITSYIHVAAAVLRIRSAKARKKAFSTCGSHLTV

VCIFFGTGIFNYMRFGSEEASDKDKGVGVFNTVINPMLNPLIYSLRNPDV

QGALWRVLVGGRSLT*

>LoafORs47.24

MDQKAGTNRTALTEFILLGLVESEKLQSVIFVLFLFAYVVTVGGNLSILA

AILVEPKLHTPMYFFLGNLSVLDVGCITVTVPPMLGRLLSHKRTISYDAC

LSQLFFFHLLAGLDCFLLTAMAYDRFLAICQPLTYSIRMSQEVQRLLVAV

SWACAFSNAMTHAITLTTLNFCGPNEVNHFYCDLPQLFQLSCSSTQLNEL

LLFAVGFIMAGTPVVLIITSYIHVAAAVLRIHSAKARKKAFSTCGSHLTV

VCLFCGTGIFNYMRLGTEEASDKDKGVGVFNTVINPMLNPLIYSLRNSDI

QGILWRILVGRSSPT*

>LoafORs47.25

MQSKSEANGTAVTEFILLGLVETPELRPTLFVLFLFAYLVTVGGNVSILA

AILVEPKLHTPMYFFLGNLSVLDVGCITVTIPSVLSRLLSHKRTVPYEAC

LTQIFFFHLLVGVDCFLLTAMAYDRFLAICRPLTYSTCMSQVVQRILVAM

SWACAFSNALTHTGAISTLNFCGPNVINHFYCDLPQLFQLSCSSTQLNEL

LLFAVGFIMAGTPMALIVNSYAHVAAAVLRIHSVEGRKKAFSTCGSHLTV

VVIFYGSGIFNYMRLGSVKLSDKDKAVGIFNTVINPMLNPIIYSLRNADV

QGALWRVLMGRRTVA*

>LoafORs47.26

MERDAGANGTAVTEFIMLGLVENPGLQPLVFVLFLFAYMVTVGGNLSILA

AILVEPKLHTPMYFFLGNLSVLDVGCITVTVPSMLSHLLSHKRTIPYVAC

LTQLFFFHQLAGVDCFLLTAMAYDRFLAICRPLTYSTHMSQVVQRILVAV

SWACAFTNALTHTVAISTLNFCGPNVINHFYCDLPQLFQLSCSSTQLNEL

LLFGLGILMAGAPVILIVTSYIHVAVAVLRIRSAEGRKKAFSTCGSHLTV

VGIFYGTGVFSYMRLGSVEASDKDKGIGILNTVISPMLNPLIYSLRNPDV

QGALQWVLTGKRALA*

>LoafORs47.27

MDLGASGNGSVVTEFVLLGLTETPALQLILFAIFLLAYVATVGGNFSILA

AILVEPKLHTPMYFFLGNLSLLDVGCITVTVPAMLRHLTSKDRSIPYRSC

LSQLFFFHLLAGVDCFLLTVMAYDRYLAICQPLTYSTRMSWGIQQAMVGM

SCVFSFSNALTQTIALSALKFCGPNVINHFYCDLPQLFQLSCSSIHLNEK

LLFVAAAFMGVAPLVLITVSYAHVVAAVLQIRSAEGRKKAFSTCSSHLTV

VGIFYGTGVFSYMRLGSVEASDKAKGVGILNTVISPMLNPLIYSLRNPDV

QGALQRVLMGRWPSK*

>LoafORs47.28

MDPGAQGNRTTVTEFILLGLTGDIGLQPILFAVFLFAYVVTIGGNLSILA

AIFVEPKLHTPMYYFLRNLSLLDIGCITVTVPPMLICLLAHQCRVPYAAC

ISQLFFFHLLAGVDCHLLTAMAYDRYLAICQPLTYSTRMGHEVQSALMGI

CCTVSFINALTHTVAVSVLDFCGPNVVNHFYCDLPPLFQLSCSSIHLNGQ

LLFAGATFMGVIPMILISVSYAHVAAAVLRIRSAEGRKKAFSTCGSHLTV

VCIFYGTGFFSYMRLGSVSASDKDKGIGIFNTVLSPMLNPIIYSLRNPDV

QGALKRVLTGKRPPE*

>LoafORs47.29

MDPGAQGNRTTVTEFILLGLTGSIGLQPILFAVFLFAYVVTIGGNLSILA

AIFVEPKLHNPMYYFLGNLSLLDIGCITVTVPPMLVCLLAHQCRVPYAAC

ISQLFFFHLLAGVDCHLLTAMAYDRYLAICQPLTYSTCMSHEVQGALVGI

CCTISFINALTHTVAVSVLDFCGPNVVNHFYCDLPPLFQLSCSSIHLNGQ

LLFAGATFMGVIPMILISVSYAHVAAAVLRIRSAEGRKKAFSTCGSHLTV

VCIFYGTGFFSYMRLGSVSASDKDKGIGILNTILSPMLNPVVYSLRNPDV

QGALKRVLTGKRPPE*

>LoafORs47.30P

MNGPDAQPLLFLLFLGVYLLNALGNLSMVVVVSSDAALHYPMYYFLGHLS

LVDVCFTTVTVPRLLISLLHPGQAISFQGCFAQMYFFVALGITESYLLAA

MSYDRAVAVCRPLHYCALMTPGRCAALVGASWAVAHLHSLLHTLVISALS

YPACAPVRHFFCDMTVMLSLATSDISAAETAIFSEGLTVVLTPLLLVSLS

YVCILVAVLGVRSAGGRRRAFSTCGAHLVVVSLFFGSVLSVYFRPLSAYS

AHYDRLASLVYAVVNKEVKGALKKEFRCRAAPQEL

>LoafORs47.31P

MGRRNQTVVSEFLLLGLPIEPEQ*ILFYALFLVMYLTTVVGNFIIIILTQ

LDSHLHAPMYLFLSNLSFSALCFSSVTIPKLLQTMQNPVPSIPYTGCLAQ

LYFFLLCADLESFLLVAMAYDRYVAICFPLHYTTIMSPQLCLCLVALSWV

LTTFISLLHALFMARLSFCADNVIPHFFCDMSALLKLACSDIQINEMMIF

ILGGLVIIVPFLLIFSSYVRIVFSILKVRSARGIRKAFSTCPCCLS/HLS

MLSLFYGMIIGLYLCPSANNSTVKETVMAVMYTMVTPMLNPFIYSLRKQD

IKGVLGRVFSNRIFHFSLGQ

>LoafORs47.32

MSGKNQTTIFEFILLGLPIEPEQRILFYGLFLAMYVTTVLGNLVIIVLIR

LDSHLRTPMYLFLSNLSFSDLCFSSVTMPKLLQNMQSQVSSIPYTGCLAQ

IYFFLFFGDLESFLLVAMAYDHYVAICFPLHYTTIMSPQLCFSLVALSWV

LTTFHAMLHTLLMARLCFCADNLIPHFFCDMSALLKLACSDTQVNELVIF

IIGGLVVVIPFLLIIMSYVRIISSILKIPSARGICKAFSTCGSHLSVVSL

FFGTIIGLYLCPSADHSTIKETVMAMMYTVVTPMLNPFIYSLRNRDMKGA

LGRVFCKRKILSSL*

>LoafORs47.33

MSGKNQTTIFEFILLGLPIDPEQRILFYGLFLAIYVTTVLGNLVIIVLIR

LDSHLHTTMYFFLSNLSFSDLCFSSVTMPKLLQNMQSQVPSISYTGCLAQ

MYFFLFFGDLESFLLVAMAYDRYVAICFPLHYTTIMSPQLCLSLVALSWV

LTTFHAMLHTLLMARLCFCADNLIPHFFCDMSALLKLACSDTQVNELVIF

ITGGVILVVPFLLIIMSYARIISSILKAPSARGIRKAFSSCGSHLSVVSL

FYGTVIGLYLCPSANNSTIKETVMAMMYTVVTPMLNPFIYSLRNRDIKGA

LGRAFHKKTFPFYL*

>LoafORs47.34

MSGKNQTIVSEFILLGLPIDPEQRILFYGLFLAMYVTTVLGNLVIIVLIR

LDSHLHTPMYLFLSNLSFSDLCFSSVTMPKLLQNMQSQVPSIPYTSCLAQ

IYFFLFFGDLENFLLVAMAYDRYVAICFPLHYTTIMSPQLCLSLVAPSWV

LTTFHAMLHTLLTARLCFCADNLIPHFFCDMSALLKLACSDTQVNELVIF

ITGGLVVIIPFILIIISYVRIISSILKVPSARGIHKAFSTCGSHLSVVSL

FYGSVIGLYLCPSANNSTVKEIVMAMMYTVVTPMLNPFIYSLRNRDIKGA

LGRAFHKKTFPFYL*

>LoafORs47.35

MAGRNQTGVSDFLLLGLPIEPEKQNLFYALFLSMYLTTVLGNMLIIVLIR

LDLHLHTPMYLFLSNLSFSDICFSSVTMPKLLQNMQSQVPSIPYTGCLAQ

LYFFLFFADLESFLLVAMAYDRYVAICFPLHYTTIMSPQLCLSLVALSWV

LTTFHAMLHTLLTARLCFCADNVIPHFFCDMSALLKLACSDTQVNELVIF

IMGGLILVVPFLLIVMSYVRIISSILKVPSVRGISKAFSTCGSHLSVASL

FYGTVIGLYLGPSANNSTVKETVMALMYTVVTPMLNPFIYSLRNRDINGA

LGRVFHKRTFPFSL*

>LoafORs48.1P

LFYSSVITSKLLGNFV*EQNVISYPECMTQLVFFCLFAIAEYYLTAMAYD

RYVAICRPLLYNVTMSQQVCTMVVTEIYIMTCYGAIWHILS

>LoafORs50.1P

CGLPQGAHWLNSRNHPHIKTVLL*DFFYCESLISHYFCDILPLMKLSCSS

TYDIELTVLFLAGFNIIVSSSTVLFSYAFILSSILHISSTKGGSKAFSTC

SSHLTAVGMFYGSSAFMYLKPSTASSLAQENVACVFYTTVIPMLKTL

>LoafORs50.2P

LICLNSQLQTPMCYFLSNLSFVDMCYSSVIIPKMLVNFVSEKNSISYAGF

LLQLYFFLVFVIAECYMLAVMAYNCSVAIHSPLLYNIIMSHQICSL

>LoafORs50.3

MTTKNSSVTEFILSGLVDQPGLQIPLFFLFLCFYVITVVWNLGLITLIGL

NSHLHTPMYFFLFNLSLIDFCYSTTITPKMLMSFVSKKNIILHAGCMTQL

FFLCFFVISESFILSAMAYDRYVAICKPLVYTVMMSPQVCFLLLLGVYVM

GCSGAVAHTGSIVSLTFCADNLVNHFMCDILPLLELSCNSTYVNELVVFI

VAAIVIGVPIVTIFISYTLILSSILHISSTEGRSKAFRTCSSHIIVVSLF

FGSGAFMYLKPPSLLPLDQGKVSSLFYTIVVPLLNPLIYSLRNKDVKIAL

RKTLRRKTFF*

>LoafORs50.4

MPAENHSTVTEFFLGGLTNRPELQLPLFFLFLGIYMVTMVGNLGMITLIC

LNSQLHTPMYYFLSNLSFVDMCYSSVITPKMLVKFVSEKNSISYAGCMSQ

LYFFLVFVIAECYMLTVMAYDRYVAICNPLLYNLTMSHQICSLLVAAVYV

MGLIGSTIETGLMLKLSYCESLISHYFCDILPLMKLSCSSTYDIELTVFF

VAGFNILVTSFTVLVSYAFILSSILHISSTEGRSKAFSTFSSHLTAVGIF

YGPTAFMYLKPSTTSSLAQENVASVFYTTVIPMLNPLIYSVRNKEVKAAM

QKTLRRKLS*

>LoafORs50.5P

PLFFLFLCFYVITVMGNLGLITLIGLNSHLHTPMYFFLFNLSLIDFCYSS

TITPKMLMSFVSKKNIILHAGCMTQLFFLFFFVISECFILSAMAYDHYVA

ICKPLVYTVTMSPEVCFLLLLGVYVMAFLGAMSHTGSILILTFCADNLVN

HFMCDIFPLLELSCNSTYVNELVVFIFVAIGIRMPIVTIFISYALILSNI

LHISFTEGRYKAFRTCSSHIIVVCLFFGSGAFMYLKPLSLLPLDQGKVSS

LFYTIVVPLLNPLIYSLRNKDVKIALRKTLRGKTFS

>LoafORs50.6

MPAENYSTVTEFILGGLTNRPELQLPLFFLFLGIYMVTLVGNLGMITLIS

LNSQLHTPMYYFLSNLSFVDMCYSSVITPKMLVNFVSEKNSISYVGCMSR

LYFFLVLAIAECYMLTVMAYDRYVAVCSPLLYNLTMSHQICSLLVAVVYF

MGLIGSTIETGLMLKLSYCESLISHYFCDMLPLMKLSCFNTYDIELTVFF

LAGFNIVVTSSTIFVSYAFILSNIFHIRSTEGRSKAFSTCSSHLTAVGMF

YGSSAFTYLKPSTVSSLAQENVASVFYTTVIPMLNPLIYSLRNKEVKDAM

QKTLRRKLS*

>LoafORs53.1P

FVVILISYLMTLVGNSTIILLSRLGARLHTSMYFFLSNLSSLDLAFTTSS

VPQMLINL*GPDKTISYGGCVTQLYVFLWLGATECSLLVMMAFDHFVAVC

RPLHYTTIMNPWLCWLLAAIALLGGLGNSVMQSTFTLQLPFMG/PIYGHR

RVDNFLCEVSAMIKLAYGDTSLNEAVLNSVCTFFTAVPLSIILISYCYIA

QAVLKIHSVEGQEKDFNTYFSLLVVGFLFYGSTIYGYLLPAETSNQDHGK

FISPFYSVVTSMVNPLIYTLRNKEVKGALRRLLGK

>LoafORs53.2P

MPIRVANQLSVSKFPLLGLSRQPQEQQLLFMLFLSMDLATVLGNPLIILA

ISADSCLHTPMYFFISNLSFVDICLTSTTVPKMLVNHILGNQTIFCGCLT

QLYFLIAFADMDNFLLVVMACYHFVAVCHPLHYTTKMTNQLCALLVPGSW

VIANV

>LoafORs53.3P

LTQLYFLIALVDMEYFLLAVMVYERFVAVYHPLCLTPKMTHQLCALPFSG

SWVIASLNALLRTLLMPRLAFCADNMIPHCDVTPLLRFSCSDTHLTEKKI

LTEGALIMITPFVCILTS*VCITCAVLRV

>LoafORs53.4P

MPISGANQSSVSEFLLLGLSKQPQQKQLLFVLFLSTDLAPVLGNLLIILA

ISTDSGLHTPMYFFLINLSFLDICFTSTTVAKVLSNHKLRSQTISFSGCL

SQMYFLIVFNSTNNFLLAVMACDCFVAVCHPLHYTTKMTHQLCALLVTGS

WVIANLNALLHTLLMAQLSFCADNTIPHFFCDVSLLKLSCSDTHLNDMMI

LIVAGPIIIAPLICVLISYILIACAVLRVPSSKG*WKALSTCGSHLAVIL

LFYGTITALYFNPSFSHSSKTDITVTMMCTMVTPMLNPFIYSLRN

>LoafORs53.5P

LFSLAKRKEMATVLENLLIILAISADSRLHTPMYFFLNILSFVDVCFSST

IVPKMLTNHIFGSQTISFSGHLTQLHFLIVCRHEQFPPGCDGQ*LPCCCL

PPLTLHNKITHQLCALLVAGLWVIANPNALFIPY*WLN*FCEGNKITLFV

CILVSYVCVTCAVLRVPFTKGTWKAFSTCGSHQVVVSLFYGTLIAVYFKL

SFSHPAEKDITAAVMYTVVTPMLNPFIYSLRNNDKKGALRKVISMKIF

>LoafORs53.6

MPMSVTNQSSVSKFLLLGLSRHAQEQQVLFMLFLSMYLATVLGNLLIILT

SITDSHLQTPMYFFLRNLSFVDICFTSTTVPEMLAKYILRRQTISFPGCL

TQIYFLILFADMDNFLLTVMTYNCFVAVCHFLHYRTKMIHQLCVLLVAGS

WVIVNLNALLHILLMAQLSFYADTILHFFCDMSPLLKLSCSDTQLNDMMI

LTAAGPIIIAPFICILISYILITYAALKVPSTKGEWKAFSTCASHLAMVS

LFYGTIIALYFNPSSSHSAETDTAATVIYTVVTPMLNPFIYSLRN*

>LoafORs53.7P

SSVYEFLLLGLSRQPPQQQLLFMLFLSMYMATVLGNLFIILAISTDSHLH

TPMYFFLSNLSFMDICFTSTTVPKMLTNPLLRSQTISFCGCLTQLYFLIV

FAYVDNFLLAVMACDCFVAVCHP/PLHYTTKMTHQLCGLLVAGLWVIAKL

NGLLHTLLMA*LSFSADNRIPHFFGDVSLLLKLTCSDTHLNEIMILIVT/

AIMIAPFIYTHISYVLIACGILRVSSTKGKWKVFPTCGSQLAVILLFYGT

IIALYFNPSFFHSAETVITAIVVNPMLNPFIYSLRNKDMKGALRKMIAMK

>LoafORs53.8P

HPAMYFFLSNLSFMDIYFFSTTIPKMLANHIFVSQNISFSGCLTRMHFLI

VFANMDNFLLAVMAYSLFVAVCHPLRYTTKMTHQLCALLVTESWVIANLN

ALLYNLLIAQLLFCADNMISKFCDVTSLLRLSCTDTHLNERMIFTEGTMI

MITAFVCIRISHICVTGAVLRVPSMKGKWKAFTACGSHLAVVSFFYGTFI

AVYFNLSSSHSAETGTTAAVMYTVVTPMLKLFIYSLRNKDLKGALSKVIS

MKFFSVQ

>LoafORs53.9P

QSSVSEFLLQGLSRQPQQQQILFLLFLSTYLVTVLGNLLIVLAISTDSHL

HTNMYFFLRNLSFVGVCFTSANIPKVLTNHVLGSQNISFSGCLTPLYFLI

VFADMDNFLLAVMAYDRFVVVCHPLHYTTKVTHQLCAMLVAGSWVIASLN

ALLHTLMMAQLLFCADNTTLYFFCDVTPLLRLSYSDTHLNEMMILTEGAL

IMITPFVCILVFYICITCAVLTLPCTKGKWKAFSTCSSHLAVVLLF*GTT

IALYFNPSFSHSVETDTTATMMYTVETPMLNFFTYSLRNKDMKGAVRKMI

VMKIYSVQ

>LoafORs53.10P

MSGENQSSVSEFLLLGLSRQPQQKQLLFVLFLSMYLATALGNLLIILAIS

TDSHLHTLMYFSLSKLSFMDVCFTSTTMLKMLTNHIPGSQTISFSGCLTQ

MYFLIVLWTIFSWL/MDNFLLAVMAYDCFVAMCYPLHYTTKTTHQLCALL

VAGSWVIANLNALLHTLLIAQLSFCADKMIPRFFCDLNPLLRLSCSDRHL

DEMMVLTEGALIMITPFFCIFVSYICVTCVVLRVPSTKGKWKDFSTCGSH

WLWFPIIAVCFSPSSSHSAEKDTAAAVMYPV*PP

>LoafORs53.11P

MRGANQSSFSEFLLLEFSRQPQQQQLLFPVFLSMYVSTFLRNLFIILAIS

TDSHLHTPSNLSFVDACVSSTIIPKMLTNHTLRSQNISFPGCLTQMHFLF

EFADMDNFLLAVMSYDHFFAVCHP*HCTTKITHQPCALLVFVSLVIA

>LoafORs53.12P

PMCFYLSNLSFMDVCFSSTTILKMLTNHILGSQTTSFPECLPQMYFFIVF

GDMGNFFLAVMSYNRFIAVCHPLHYTTKITRHLCVLLVAESLIIANLNAV

LHTLLMA*LSFCTDNTIPHFFCDLNPLLRLSCFYTHLKEMMILIERALIL

STTFICILISYLCITCAVLRVPSTKEHGKPFHLWFPPGCGFHLAVVSLFY

GTIFAVYFNPSSSHSAEKGITAAVMYMVVTSMLNPFIYSLRNKDLKWALR

KVIGRKKFT

>LoafORs53.13P

LSRENQSSVSEILQGLSRQPEQHQLLFLLFLSMCLATVLGNLLIDLAIST

DSRLHTPMYFFLSNLSFMDVCFSSTIVPRILTITYSG/QRYFLFEFADMD

NFLLAVMAYDHFVAVCHLIHYTTKMTPQLCALLVTGLWVIANLNAVLHIL

LMA*LSFCTDSTTPNFFCDVTPFLRLSCSDTHLNEVMILTEGALIMITPF

VCILVSYIGITSAVLRVPSTNGI*KAFSTCGSHLAVVSLFYGTIIAVYFN

PSSSHSAEKDTVATVMYTVVPAMLNSFIYSLRNKDMKRALIKIIVRKTCS

>LoafORs53.14P

EFFLLGLSGSPSSSSSSSCSS*TCTWPQSWETCLSSLPSAQTFTCTPPMY

FFLCSLSFLDVRFCSSTVPKLLTYHILGSRTIFFSGYLTQLYFFIVFNDV

NYFLLAVMACDPFVAVCQPLHYTTKVTHQLFALPVAGSWVIANVNALLHT

LLMAQLLFCADNTILHFYDVTLLRFSCSDTHLNETMILTEGTLMTVTPFV

CILFSYICINCVVLRVPSTKGTWKAFSTCGSHLAVVSLFYGTIISVYFNP

SSSHSDEKDSAATVLYTVVTPMLNPFIYSLRNKDMRKALRK*LAKKLF

>LoafORs53.15P

GLSRQPQEQQLLFLLFLSMYLATVLGNLLIILAISAGSCLYTPMYFFLSN

LSFVDLFFSSTTVPKMLANHILRSQTISFPRCLPQMYFLSEFANMDNFLL

AVMAYDCFVAVCYPLHYTTKTIPQLCALLVIGSWVIAILNALLHALLIAQ

LSFCADNIIPLFFCVVTPLLGVSCSDTHLNEMMIFTEGSLIMITPFVCIL

VSYICITSVVLRVPFTKGTGKDFSTCGSHLAVVSLFYGTIIVVYFNPSSS

HSAEKDIAAAVMYTVVTPMLNPFIYSLRNKDMKRALKNFIFMKIF

>LoafORs53.16P

MPISGSNQSSGSEFFLLGLSTQHQQRQVIFVLFLSMYLATALGNLAISAD

SHLHTAMYFFLSNLSFVDVCFSSITVPKALTNGILRSQTISFPGCLLQLY

FLIVFGDVDNFLLAMMSYDCFVAVCYPLHYTTKMTCQLCALLVAMSWVID

NLNALLHTLLMARLSFCADNTIYHFFCDMSLLLKLFCSDTHLNEMTIVTG

GGGLIMVIPFVGILVSYICIPCVVLRVPSTKGIGKAFSTCGSHLAVASVF

YGTIIAVYFNPSSYCSAENDIPATVMYSGDPHAEPF

>LoafORs53.17P

ESHLHTAIYSFPSNLSFVDICVSSTIIPKMLTNHILGSQAMSFPGCLIQM

YFLFEFADIDNFLLAVMAYDRFVSVCHPLYYTTKMTLQLCPAGCWVIANL

NALLHTLLMA*LSSVQTTGSPTSSVI*LLS*DSPALTHTSMR**FLLRGP

**RSPHLFASWFPTFASPVLS*ESHPQRENGCGSCLAVVSLFYGTIFAMY

FNPSSSHSAEKDIPATVMHTVVTPMLNPSIYSLRN

>LoafORs53.18P

VQTPTCTPPRNSSSATCPLWMSASPPPLSQRCCQIISFSGCLTQLYFLIV

FGGTDNFLLAVMAYDCFVAVCHPLHYTTEMTHQLCALLVTGSWVIANLNA

LLHTLLMARLSFCSDNTIFHIFCDVTPLLKLSCSDTHVNDLMILTVAGLI

IIAAFICMLTPYILIVSAVLRVLFTKGTGKAFSTCGSQLAVVSLSYGTII

AVYFIPSSSHSAEKDTAAAVMYTVATSMLNPSIYSLRS

>LoafORs53.19P

SQLSVS*FLLLGLSRQPHQQKLLFMLFLSGYLATVVGTC*SSWPSAQTPT

CTPPLLLSQQPVLCRHLLHLHHCPQDVDQSYIHQAELLLLLLSHTAVFSH

YVADMDNFLLAVMAYDCFVAVYQSALSPAGSWVMGHCQSECSVAYPADGS

ILILCRQHNSPLL*VSLLRLSCSDTHLNEMIVLTEGALIMITLFVCILVS

YICITSAVPRVPSTKGK*SFPPVAPTWLWFPSSMAASLLCILTLHPPTQL

RKMLQPL*CTVVTAILSEPFHLQPQNKDMKGALRKVISMKVCSVQ

>LoafORs53.20P

FLSMYLATVLGNLFIILAIGANSHLHTPTYFFLSNLSFVDICFSSAIVLK

MLANHILQSQTISFPGCLMKMYFLIMFADMDNFLLAVMASDHFVAVCHPL

YYRTKMSHQLCALLVTGLWVTANLNALFHTLLMAQLLFCADNVIPHFFCD

VTPLLRLSCSDAHLNEMMILTEGSLIIITPFVCVLVSYICIISAVLRVPS

TKGRWKTFSTCGSHLAVVYLFYGTIIAVYFNPSSSHSAEKDIAAAVMYTV

VTPMLNPFIYSLRNKDMKGALRKVISMKFFSVQ

>LoafORs53.21

MNRGNQSSVSEFLLLGLSRQPQQQQLLFVLFLSVYLVTVLGNLLAILATT

TDSHLHTPIYFFLNNLSFVDVCFSSTTVLKMLANHILGNQTIIFSGCLTQ

LYFFIAFCDVDNFFLAVMAYDCFVALCCPLHYTTKVTHQLCALLAAVFCV

IANLNALLHTLLMAQLSICADNTILHFFCDVTPLLRLSWSGTYLNEMMIL

TEGAPIMITPFVCNLASYICITSAVLRVPFTKGRWKAVSTCSSHLAVVSL

FYGTIIAVYFKPSSSHSAEKEIAAAVVCAVVTSMVNTFIYSLRNKGVKWA

LRKVTFMKIFSVK*

>LoafORs53.22P

NQSSISELLLRGLSRQPQQQQFLFVFFLSMYPATVLGNLLIVLAISTDSC

LHTHMYFFLSNLSLVDIYFSSTISTKMLANHILGG*TIFFSECLK*LHFL

IMFGITDDFLLAVVAYGHFVAVCHPLHYTIKMTPWLCALLVIGLWVIAIV

NALLHTLLMALLSFCADYMIPHFCDVTSLLRL/SCSDTYLSEMMILTAGA

LIMITPFVCMLISYICITCAVLRVPSAKGSWKAFSTCCSHLAVVYLYGII

TAVYFNPSFSHSAEKDTSPSVMYTVMTPMASPFIYSLRKR

>LoafORs58.1

MRNGTAITEFILIGFPGIQGLQIPLFIVIFLIYILTLGGNGLIIIIVWAE

PRLQIPMYFFLCNLSFLEIWYTTTVIPKLLETFVVARTVICIPCCLLQAF

FHFFLGTTEFLILTVMSFDRYLAICKPLHYPTIMTSNLCLRLALSSWVAG

FTIIFCQTLPLIQVPFCGNNVINHFYCDVGPILKAACTDTTLLELLSLLA

TSLVIPGSLFFTTISYICILSTILQISSATGRQKAFSTCASHLTVVSLLY

GAALFMYLRPTTHSSFNINKVVSVLNTILTPLLNPFIYTIRNKEVKGALM

KAMACPKAHHQEKNVQHSP*

>LoafORs58.2

MRNGTAITEFILIGFPDIQGLQIPLFIVIFLIYILTLGGNGLIIIIVWAE

PRLQIPMYFFLCNLSFLEIWYTTTVIPKLLETFVVARTVICIPCCLLQAF

FHFFLGTTEFLILTVMSFDRYLAICKPLHYPTIMTSNLCLWLALSTWMTA

FTIVFCQMLLLIQLPFCGNNIINHFYCDIGPILKAACTDTTFLELLGFLA

TISVIPGSLFFTTISYICILSTILQISSATGRQKAFSTCASHLTVVSLLY

GAVLFMYLRPTTHSSFNINKVVSVLNTILTPLLNPFIYTIRNKEVKGALR

KTMACAKVRHQSKNVQHSP*

>LoafORs58.3

MALGNWSTVTEFTLIAFPRLLELRLFLFVLLLLTYTLTAIGNIIIISLIW

TDNGLQTPMYFFLSNLSFLDTLYTTVITPKLLACLLGKRAISFAGCITQT

YFYFFLGTVEFILLAVMSFDRYVAICNPLRYNIIMNSSVCLILVLSCWMG

AFLSVLVPTIIVTRLPYCNKEINHFFCDIAPLLQVACIDTRLIEKINFLL

SALVILSSLAFTTGSYIYIISTILRIPSAQGRQRAFSTCASHITVVSIAY

GSNIFVYVRPNRNYSLDFDKIAAVLITVVTPLLNPFIYSLRNEKVKKVLR

DNEQNHVLDTLENLIFSV*

>LoafORs58.4

MNVQNQTTVTEFTLTTFPVLQKLQISLFVVLLFTYMLTLTGNTVIISLIW

ADNRLQTPMYFFLSNLSFLDILFTTTTAPKLLACLLEERKTISLAGCITQ

TYFYFFLGTVEFILLAVMSFDRYVAICNPLRYTIIMNSRVCLLLVLGCWV

GAFLSVLCPIIVLSRLPFCYNEIHHFFCDIGPLLQVACIDTHFIEMINFL

LSSLVLLTSLVFTTVSYTYIISTILRIPSAQGQQKAFSTCASHITVVSIA

YGSNIFMYVRPSQSHLLDVDKATAVLTTMVTPLLNPFIYSLRNQKVKEVL

REAISRLRSSLHKRT*

>LoafORs58.5

MNVQNQTTVTEFTLTAFPVLQKLQISLFAVLLFTYMLTLIGNTVIISLIW

ADNRLQTPMYFFLSNLSVLDILYTTSVTPKLLACLLEKRKIISLAGCITQ

TYFYFFLGTVEFILLAVMSFDRYVAICNPLRYTIIMNSRVCLLLVLGCWV

GAFLSVLCPIIVLSRLPFCFKEIHHFFCDIGPLLEVACIDTHFIEMINFL

LSSLVLLTSLVLTTVSYTYIISTILCIPSAQGQQKAFSTCASHITVVSIA

YGSNIFMYVRPSQSHLLDFDKATAVLTTMVTPLLNPFIYSLRNQKVKEVL

REAISRLRFSLHKRT*

>LoafORs58.6

MNVQNQTAVTEFTLTAFPVLQKLRISLFAVLLFTYMLTLTGNIAIISLIW

ADNRLQTPMYFFLSNLSFLDVLFTTTTAPKLLACLLEERKTISLAGCITQ

TYFYFFLGTGEFILLAVMSFDRYVAICNPLCYTIIMNSRVCLLLVLGCWV

GAFLSVLYPAIVISRLPFCFKEIHHFFCDIVPLLQVACIDTHFIEMINFL

LSSLILLTSLVLTTVFYTYIISTILRIPSAQGQQKAFSTCASHITVVSIA

YGSNIFMYVRPSQSHLLDVDKATAVLTTMVTPLLNPFIYSLRNQKVKEVL

REAINRLMSLLHKRT*

>LoafORs58.7P

MVTRNQITVTEFTLISFPIVQELQILLLAFMLTITGNIIIIFLIWTNNRL

QTPMYFSLSNLSFLDILFTTTIAPKLLACLLEERKTISFSGCITQTYFYF

FLGTVEFILLAVMSFDHYVAIRNPLHYTIIMNSRVCLLLVLGCWVGAFPS

VLCPTIVVSRLPYCTEEISHFFCDITPLLQVACIDTCFIERINFLLSSLV

VLSSLVPTTVSYTYVISTILHIPSTQGQQKAFSTCASHITVISIAYGRSI

FMYVRPNQSYSLDFEKVTAVLTTVVTSFLNPFIYSLRNKR

>LoafORs58.8

MDMRNYSTVTEFLLSGLTDQPELQLPLFCLFLGIYMVTVVGNLGMISIIG

LNSQLHMPMYYFLSNLSFIDVCYSSVVTPKMLAGFLRRDKAISYNGCMTQ

LFLSLYFVISECYMLVAMAYDRYVAICSPLLYNVIMSPRVCSLLVAAVFS

IGFMDAVIHTGCILRLSFCNSNIISHYFCDAVPLIKLSCSSTYIDELLIF

IIGGFNMVAPSLSIIISYAFILSSILRIHSKEGRSKAFSTCSSHPTAVLI

FYGSLMSMYLKPASNSSLTQEKVSSVFYTTVIPMLNPLIYSLRNKDVKNT

LIKLLRRKISS*

>LoafORs58.9

MAMETEYPNQTMVSYFCLGGLTYTAEHPTLFFLLLLLIYSITMTGNLLIL

LTVGSDPHLCSPMYHFLGHLSFLDACLSTVTVPKVMAGLLTLDGRVISFE

GCAVQLYCFHFLGSTECFLYTVMAYDRYLAICQPLQYPVTMNRQMCAGLA

GITWAIGAVHSAIHTSLTFRLLYCGPHHIAYFFCDIPPVLKLACADTTIN

EIVILANIGIVGAGCLVLIVISYVFIVAAVLEIRTAKGRQRAFSTCTAHL

TVVLLYYMPPVCIYLQPRSSGAGAGAPAVFNTMVTPMLNPFIYTLRNKEV

KRALRRLLCQGFLESPPSSPAP*

>LoafORs58.10

MDMRNYSTVAEFLLSGLTDQPELQLPLFCLFLGVYMVTVVGNLGMISIIG

LNSQLHTPMYYFLSNLSFIDVCYSSVVTPKMLAGFLRSDKAISYNGCMTQ

LFFFLYFVISECYMLVTMAYDRYVAICSPLLYNVIMSPQVCSLLVAAVFS

VGFMDAVIHTGCILRLSFCNSNIISHYFCDIVPLIKLSCSSTYIDELLIF

IIGGFNTVATSLSIIISYAFILSSILCIHSKEGRSKAFSTCSSHLTAVLI

FYGSLISMYLKPASNSSLTQEKVTSVFYTTVIPMLNPLIYSLRNKEVKNT

LIKLLRRKLSS*

>LoafORs58.11

MAVKTEYPNQTMVSYFCLGGLMYTAEHPTLFFLLLLLIYSITMTGNLLIL

LTVGSDPHLRSPMYHFLGHLSFLDTCLCTVTVPRVMAGLLTLDGRVISFE

GCAVQLYCFHFLASTECFLYTVMAYDRYLAICQPLQYPVTMNRQMCARLA

GITWAIGAVHSAIHTSLTFRLLYCGPHHIAHFFCDIPPVLKLACADTTIN

EIVILANIGIVAAGCLVLIVISYVFIVAAVLEIRTAKGRQRAFSTCTAHL

TVVLLYYMPPVCIYLQPRSSGAGAGAPAVFYTMVTPMLNPFIYTLRNKEV

KRALRRLLCQGFLESPPSSPAP*

>LoafORs58.12

MDMRNYSTVAEFLLSGLTDQPELQLPLFCLFLGIYMVTVVGNLGMISIIG

LNSQLHMPMYYFLSNLSFIDVCYSSVITPKMLAGFLCRDKAISYNGCMTQ

LFFFLYFVISECYMLVAMAYDRYVAICSPLLYNVIMSPQVCSLLVAAVFS

VGFMDAVIHTGCILRLSFCNSNIISHYFCDAVPLIKLSCSSTYIDELLIF

IIGGFNTVATSLSIIISYAFILSSILCIHSKEGRSKAFSTCSSHLTAVLI

FYGSLMSMYLKPAANSSLTQEKVSSVFYTTVIPMLNPLIYSLRNKEVKNT

LIKLLRRKLSS*

>LoafORs58.13

MAMETEYPNQTMVSYFCLGGLMFTAEHPTLFFLLLLLIYSITMTGNLLIL

LTVGSDPHLRSPMYHFLGHLSFLDACLSTVTVPKVMAGLLTLDGRVISFE

GCAVQLYCFHFLASTECFLYTVMAYDRYLAICQPLQYPVTMNRRMCAGLA

GITWAIGAVHSAIHTSLTFHLLYCGPHHIAYFFCDIPPVLKLACADTTIN

EIVILANIGIVGTGCLFLIVTSYIFIVAAVLGIRTAKGRQRAFSTCTAHL

TVVLLYYMPPVCIYLQPRSSGAGAGAPAVFYTMVTPMLNPFIYTLRNKEV

KRALRRLLCQGFLESPPSSPAP*

>LoafORs58.14

MDMRNHSTVAEFLLSGLTDQPELQLPLFCLFLLIYMVTVVGNLGMISIIG

LNSQLHMPMYHLLSNLSFIDICYSSVVTPKMLAGFLCRDKAISYNGCMTQ

LFFSLYCVISECYMMVAMAYDRYVAICSPLLYNVIMSPQVCSLLVAAVFS

IGFTDAVIHTGCILRLSFCDSNIISHYFCDIVPLIKLSCSSTYIDELLIF

IIGGFNMVAPSLTIIMSYAFILSSILCIHSKGGRSKAFSTCSSHLTAVLI

FYGSLMSMYLKPASNSSLTQEKVSSVFYTTVIPMLNPLIYSLRNKDVKNI

LVKLLRRKISS*

>LoafORs58.15P

MAEETEYPNQTMVSYFFLEGLMYTAEHPTLFFLLLLLIYSTTMTGNLFIL

LTVGSDPHLRSPVYQFLGHVSLLDACLCAVTVPRVMAGLLTLDGKVISFE

GCAVQLYCFHFLASTECFLYTVMAYDRYLAV/CQPLQYPVAMNRQMCAGL

AGITWAIGAVHSGIHTCLTFHLLYHGPHHIAYFFCDILSVLKLVCADTTV

NEIVILANIGIVAPGCRILIVISYVFIVATVLRIHTAEGQQRAFSMCTAH

LTVVLSYYMPPACIYLQPRSSGAGAGAPAVFYTMVTPMFNPFIYTMRNKE

VKRAQKRLLC*GSQEFPLSIPA

>LoafORs58.16

MDMRNHSTVAEFLLSGLTDQRELQLPLFCLFLLIYMATVLGNLGMISIIG

LNSQLHMPMYYFLSNLSFIDVCCSSVVIPKMLAAFLCRDKAISYNGCMTQ

LFFSCIFVISECYMLVAMAYDRYVAICSPLLYNVIMSPQVCSLLVAAVFS

IGFMDAVIHAGCVLRLSFCDSNIISHYFCDIVPLIKLSCSSTYIDELLIF

IIGGFNVVATSLTIIISYVFILSSILRIHSKEGRSKAFSTCSSHLTAVLM

FYGSLMSMYLKPASNNSLTQEKVSSVFYTTVIPMLNPLIYSLRNKDVKNT

LVKLLRRKIPS*

>LoafORs58.17P

VDSFIVLCVYVKSPKSHRGKKNNLL*PWQLAFSTCTAHLTVALLYYMPPM

YIYL*PCSSGAGAGAPAVFYTVVTPKLNPFIYTLWNKEVKGALRRLLCQG

SQGSPASIPAP

>LoafORs58.18P

MTMETKYPNQTMVSYFFLESLMYTAEHPTLFFLLIYSITMTGNLLILLTV

GSDPHLRSPMYHFLGHLSFLDAYLSTVTVPKLMAGLLTLDGKVISFEGCA

IHLYCFYFLATTECLLYIVTAYDRYRAICQPLQYQVAMNRQMCAGLAGIT

WAIGAVHSAIHTSLTFHLLCRGPYHIVYFFCDISPVLKLVCADTTINEII

TLANIGIVAEGCLILIIISYVFFVAAVLQIHTAKGWQCASSTCTSHLTVV

LLYYMPPV/LCIYLQPHSSGAGAGAPAVFYTMVTTMLSPFIYTLWNNEVK

RALRRLLCQVSQESPASSRAP

>LoafORs58.19T

MKNHSTAAEFLLSGLTDQPELQLPLFCLFLGIYVVTMVGNLGMISIIGLN

SQLHMPMYYFLSNLSFIDACYSSVITPKMLAGFLCRDKTISYNGCMTQLF

FSCIFGISECYMLVAMAYDRYVAICSPLLYNVIMSPQVCSLLVAAVFSIG

FMDAVIHTGCILRLPFCDSNIISHYFCDIVCLIKLSCSSTYIDELLIFTI

GGFNMVATSLTIIISYAFILSSILRIHSKKGRSKAFSTCSSHLTAVLIFY

GSLMSMYLKPASNSSLTQEKVSSVFYTTMIPMLNPLIYSLRNKEVKNTLA

KX

>LoafORs58.20P

MNPENWTQVTGFVLLGFPSSYILQFLLFLGLTVAYVVTATGNLLIIVLSR

VDQCLHTQMYFFLRNLSLELLLLSVVVPKMHVIIVSGDNTISFASCITQS

YLYFLLGTTVFFLLAVTSLDHYLAICRPLHYQTLMSGHVCSRLVLASWLA

GFLWVLSPTILMVCLHFCGPNCIDHFFCDTWPLLRLSCGDTHLLELVAFV

LSTLVLLGSLAVTLVSYVCILATVLRAPTDNEWKKAFSTCTSHFTVVTIV

YGSCIFLYICLSVAQSMLLNQGASVLC/VTPFLSPFIFTLSNNKLKQALI

DALWWHGPTAFRRL

>LoafORs58.21

MKNHSTVAEFLLSGLTDQPEFQLPLFCLFLGIYLVTVVGNLGMISIIGLN

SQLHMPMYYFLSNLSFIDVSYSSVVTPKMLAGFLRRDKAISYNGCMTQLF

FSCIFVISECYMLVAMAYDRYVAICSPLLYNVIMSPQVCSLLVAAVFSIG

FMDALIHTGCILRLPFCDSNIISHYFCDIVPLIKLSCSSTYIDELLIFII

GGFNMVATSLTIIISYAFILSSILHIHSKEGRSKAFCTCSSHLTAVLIFY

GSLMSMYLKPASNSSLTQEKVSSVFYTTVIPMLNPLIYSLRNKDVKNILV

KLLRRKIPP*

>LoafORs58.22

MDLKNHSTVAEFLLSGLTDQPGLQLPLFCLFLGIYLVTVVGNLGMISVIR

LNSQLHTPMYYFLSNLSFIDVCTSSVITPKMLAGFLCIDKTVSYNGCMAQ

LFFFCIFGISECYMLVAMAYDRYVAICSPLLYNVIMSPQICSLLVAAVFS

IGFMDAVIHTGCVLRLPFCDSNIISHYFCDIVPLIKLSCSSTYIDELLIF

IIGGFNMVATSLTIIISYAFILSSILRIHSKEGRSTAFSTCSSHLTAVLI

FFGSLISTYLKPASNNSLTQEKVSSVFYTTMIPVLNPLIYSLRNKEVKNI

LVKLLRRKIPS*

>LoafORs58.23

MNPANHSQVTGFVLLGLSQIWEFRFLFFIVFSAVYLMTVTGNLLVVATVT

SNSRLHTTMYFLLGNLSFLDACYSSITAPRMLADLLSGNPTISFGGCLTQ

LFFFHFIGGIKIFLLTVMAYDRYVAISQPLRYTLIMNKTVCGVLMAASWV

GGFIHSAVQVALTTQLPFCGPDKLDNFYCDVPQLIKLACTDTFVLELLMV

SNNGLVTLLCFLVLLGSYTGLLVMLRNHSREGRSKALSTCASHIAVVILI

FVPCIYIYARPFRALPMDKAVSVLYTMVIPMLNPAIYTLRNKEVIIAMKK

LWRSQKFCLGSPEH*

>LoafORs58.24

MNPENWTQVTGFVLLGFPSSYILQFLLFLGLTVAYVVTATGNLLIIVLSW

VDRRLHTQMYFFLQNLSFLELLLVSVVVPKMLVVIVTGDHTISFVSCITQ

SYLYFLLGTTDFFLLAVMSLDRYLAICRPLHYQTLMSGHVCSRLVLASWL

AGFLWVLFPTILMASLPFCGPNCIDHFFCDSWPLLRLSCGDTHLLELVAF

VLSTLVLLGSLAVTSVSYVCILATVLRAPTAAERRKAFSTCTSHLTVVII

VYGSSIFLYVRMSEAQSMLLNKGVSVLCCIITPLLNPFIFTLRNNKVKQA

LIDALWWHRPTAGRRL*

>LoafORs58.25

MTVKTEYPNQTMVNYFSLEGLMYTAEHPALFFLLFLLIYSITMAGNLLIL

ITVGSDPHLRSPMYHFLGHLSFLDACLSTVTVPKVMAGLLTLDGKVISFE

GCAVQLYCFHFLASTECFLYTVMAYDRYLAICQPLQHPVTMNRQMCAGLA

GITWAIGAVHSAIHTSLTFCLLYCGPHHIAYFFCDIPPVLKLACADTTIN

EIVILTNIGIVVTGCLILIVISYVFIVAAVLRIRTAEGRQRAFSTCTAHL

TVVLLYYMPPVCIYLQPGSSGAGGGAPAVFCTMVTPMLNPFIYTLRNKEV

KRALKRLLCQGSQESAASIPAP*

>LoafORs58.26

MQSGNQSSVSHFILVGLHHPPQLGIPLFLAFLVIYILTMSGNGLIIFTVL

VDIRLHRPMYWFLCHLSFLDMTISSAIVPKMLSGFLLDSRVISFGGCVIQ

LFSFHFLGCTECFLYTLMAYDRFLAICKPLHYATIMTRSVCTYLAFGTWL

GGTLHSLFQTSFIFQLPFCGPNQVDYFFCDIPAMLHLVCIDTTVNELVTF

VDIGFLVLTCFVLILTSYGYIVAAILKIHSANGRRNAFSTCTAHLTVVIV

YYVPCSFIYLRPGSEEPLDGVVAVFYTVFAPLLNPIIYTLRNKEMKAALG

RLRGCKDIQPH*

>LoafORs58.27

MSNLSLVTTFILMGIPHAPALDTTLFEIFLVIYALTVVGNLLILLVIRVD

SNLHTPMYYFLANLSFIDMWFSTVTVPKMLMTFVSPRGRAISFHSCVAQL

YSSHFLGSTECFLYTVMSYDRYLAISYPLRYSSMMNGRTCALLASSTWLS

GSLHSAVQTILTFRLPYCGPNQIRHYFCDAPPILKLACADTSVNEIVIFI

DIGVMASGCFLLIALSYVSIVCSILKIRTSEGRRRAFQTCTSHCIVVLCF

FGPGLFIYLRPGSKNTVDGVVAVFYTVLTPLLNPVVYTLRNKEVRRALFK

LRDKTLSQSK*

>LoafORs58.28

MSNLSLVTTFILMGIPHPPALDTTLFGIFFVIYVLTVVGNLLILLVVRVD

SHLRTPMYYFLANLSFIDMWFSTVTVPKMLMTFVSPEGRAISFNSCVVQL

YSFHFLGSTECFLYTVMSYDRYLAISYPLRYTSMMSKKTRTLLATSTWLS

GSLHSAIQTILTFRLPYCGPNQIQHSFCDATPVLKLACADTSTNEMVIFV

NVGVVASGCFLLIVLSYVSTVCSILKICTSEGRHRAFQTCASHCIVVLCF

FVPCVFIYLRPGSRNAVDGVVAVFYTVLTPLLNPVVYTLRNKEVKRALFK

LKDKTLSQSK*

>LoafORs58.29

MAVETEYPNQTMVSYFFLEGLMYTAEHPALFFLLFLLIYSITVTRNLLIL

ITVGSDPHLCSPMYHFLGHLSFLDACLSTVTVPKVMAGLLTLDGKMISFE

GCAVQLYCFRFLASTECFLYTIMAYDRYLAICQPLQYPVSMNRQMCSGLA

GITWAIGAVHSAIHTSLTFHLLYCGPHHIAYFFCDIPSVLRLACADTTIN

EIVILANIGIVAAGCLILIVISYAFIVAAVLGIHTAKGRQRAFSTCTAHL

TVVLLYYMPPVCIYLKPRSSGAGAGAPAVFYTMVTPMLNPFIYTLRNKEV

KQTLRKVLCQGSQKSLAGIPAP*

>LoafORs58.30

MSNLSLVTTFILMGIPHAPALDTTLFGIFLVIYALTVVGNLLILLVIRVD

SHLHTPMYYFLANLSFIDMWLSTVTVPKMLMTFVSPRGRAISFHSCVAQL

YSFHFLGSTECFLYTVMSYDRYLAVSYPLRYTSMMSRKTCTLLATSTWLS

GSLHSAVQTILTFRLPYCGPNQIQHYFCDAPPILKLACADTSTNEMVIFV

NIGVVSSGCFFLIVLSYVSIVCSVLKIRTSEGRHRAFQTCTSHCIVVLCF

FGPGLFIYLRPGSKDAVDGVVAVFYTVLTPLLNPVVYTLRNKELKRVLFK

LKDKTLSQSK*

>LoafORs58.31

MSNLSLVTTFILMGIPHAPALDTTLFGIFFVIYVLTVVGNLLILLVVRVD

SHLHTPMYYFLTNLSFIDMWLSTVTVPKMLMTFVSPRGRAISFHSCVAQL

YSFHFLGSTECFLYTVMSYDRYLAVSYPLRYTSMMSRKTCTLLATSTWLS

GSLHSAVQTILTFRLPYCGPNQIQHYFCDAPPILKLACADTSANEMVIFV

NIGVVALGCFLLIVLSYVSIVFSILKICTSEGRHRAFQICTSHCIVVLCF

FVPCVFIYLRPGSKDAVDGVVAVFYTVLTPLLNPVVYTLRNKEVKKALLM

LKSGSVFTQSK*

>LoafORs58.32

MKMRNHTAVTEFLLMGIPHTEGMENVFLVFFLGLYLLTLVGNLLILLAIL

SSPNLHTPMYFFLGNLSVFDIFFPSVSSPKMMLCLMGHSHTISFQGCATQ

LFFYHFLGCTECFLYTVMAYDRFAAICHPLRYMVIMSHRVCAILTLGTWM

GSCVHASVLTFLVFKLPYCGPNEVNNFSCDIPVMLSLACADTSLAQTVSF

TNVGVVALMCFLLVLTSYTRIVISILRISPSEGRRKAFSNCSAHLTSILL

FYGPVVLIYLRPASSPWLDTVVQVLSNIVTPSLNPLIYTLRNKDVKLALR

KVLIPGGHTC*

>LoafORs58.33

MKMRNHTAVTEFLLMGIPHAEGMENVLFVLFLGLYLLTLVGNLLILLAIL

SSPNLHTPMYFFLGNLSVFDIFFPSVSSPKMMLCLMGHSHTISFQGCATQ

LFFYHFLGCTECFLYTVMAYDRFAAICHPLRYTVIMSHRVCAILTLGTWL

GSCVHASVLTFLVFKLPYCGPNEVNNFSCDIPMMLSLACADTSLAQTVSF

TNVGVVALMCFLLVLTSYTRIVISILRISSSEGRHRAFSNCSAHLTSILL

FYGPVVLIYLRPASSPWLDTVVQVLSNIVTPSLNPLIYTLRNKAVKLALR

KVLIPEGPTC*

>LoafORs58.34

MTMRNHTPITEFLLMGIPHTEGMENVLLVLFLGLYLLTLLGNLLILLAIL

ASSNLHTPMYFFLGNLSVFDIFFPSVSSPKMMLCLMGHSHTISFQGCATQ

LFFYHFLGCTECFLYTVMAYDRFAAICHPLRYMVIMSHRVCAILTLGTWM

GSCVHASVLTFLVFKLPYCGPNEVDNFFCDIPMMLSLACADISLAQTVSF

TNVGIVALMCFLLILTSYTRIVISVLKISSPEGRRRAFSTCSAHLTSILL

FYGPVVLIYLRPASSPWLDTVVQVLNNIVTPSLNPLIYTLRNKAVKLALR

KVLIPGGSVC*

>LoafORs58.35P

PCISFWETCSVGHIFPFSEFSQNDALPNGAQPRTISFQDCATQLFFYHFL

GCTECFLYTVMAYDRFAAICHPLRYMVLMKHQVCAILAVVTWMGSCVHAS

VLTFLVFKLPYCGPNEVDNFFCDIPVMLSLACADTSLAQTVSFTNVGVVA

LMCFLLILTSYTRIVISILRISSSEGRRRASSTCSAHLTSILLFYGPVVR

IYLRPASSLWLDTVVQVLNNIVTPSLNPLIYTLRNKDVKLALRKVQI

>LoafORs58.36

MRNHTMVTEFILLGIPETKGLETVLFFLFSSLYLCTLLGNVLILTAILSS

SRLHTPMYFFLGNLSMFDLGFSSTTIPKMLLYLSGQSQAISFQGCASQLF

FYHFLGSIECFLYTVMAYDRFVAICHPLRYKVIMNHRVCSVLTSGTWMGG

CVHAIILTSLTFQLPYCGSNEVGYYFCDIPAVLTLACGDTSLAQRVGFTN

VGLLSLICLFLIFVSYIHIGISISKIRSAEGRQRAFSTCSAHITAILCAY

GPVIIIYLQPNPSPVLGATIQILNNLVTPMLNPLIYSLRNKDVKSALRNI

FSKRSFTLENT*

>LoafORs58.37P

MRNHPELREFILLGIPQTKGLETVLFVIFLFIYLFTLLGNLLILTAIVSS

STVHTPMYFFLGLLSIFDILFPSVTCPKMLFYLSGQSQAISYKGYATQLF

FYHFLSCMEGCLYSGMAYHHFVAICHPLRYMLIMKPRVCVGLVMGTWLVG

CLDATVL/FSFHLCGTNQVDYFCDIPPVLLLACADSSLAQRVGFTNVGLL

AVTLLLSICVSYTRIGIATLRIHSAEGRQKAFFTYSAHPTAILCAYGPVI

IIYLQPTPKPLLGAVVQILNNLVSPMLNLLIYSLRNKKVKSPLKSVFHNV

>LoafORs58.38P

MGPGNHSTMTEFILAGLTDKPELQLPLCLFFLGTYMVTVVGNLGMITLIG

LSSCLHTPMYHFLSSLSFIGLCQSTVITPKMLVNFMTEKNTFSKPECMTQ

LYFLLICIISECQMLAVMAYDHYVDICNPLLYNVTMSYQVCSWLVVEVYM

IGLIGATAHTGCM/INHYFCDVLPLLELSFSSTFYINEVVVLFFSAFNIL

APTLTILGSYVSIIAGILGIHSTEGCSKAFSTCSSHILAVTILYGSAAFM

YLQSSNVSSMDQGKVSSVFYTIIALILNPQTIA*VIRTSKLS*KKIEKRP

FCTCKDL

>LoafORs58.39

MAAGNHSTVTEFILAGLTDKPELQLPLFLFFLGVYLVTVVGNLGMITLIR

LSSHLHTPMYYFLSSLSFIDLCCSTVINPKMLVNFVTEKNTISYPECMIQ

LYFFIFFIVSESHMFAVMAYDRYVAICKPLLYNVTMSYQVCSWLIVEVYM

MGFIVATAYTVCMLRVVFCNAKTIHHYFCDIFPLLELSCSSTYANVLVIL

CLSVFNILAPTLTILGSYVSIIASILRIRSTEGKSKAFSTCSSHITAITI

FYGSTAFMYLQPSNVSSTVQSKVSSVFYTTIVPMLNPLIYSLRNKDVKVA

LSKIIEKRLFCISKDF*

>LoafORs58.40

MAAENDSTVTEFIFAGLTEKPELQLPLFLFFLGVYVVTVVGNLGMITLIG

LSSHLHTPMYYFLSSLSFIDLCQSTIITPKMLMSFVTEKNTISYPECMTQ

LYFFLVFAVAECHMLAVMAYDRYVAICNPLLYNVTMSYQVCSWLVVEVYM

MGLTLATAHIGCMLKVIFCKAKIINHYFCDILALLELSCSNTYINEVVLL

CFSVFNILTPTLTILGTYVSIIASILRIHSTEGRSKAFSTCSSHFSAVTL

FYGSLAFMYLQPSNANSMDQSKVSSVFYTIIVPMLNPLIYSLRNKDVKVT

FNKIIEKRPFCISKDF*

>LoafORs58.41P

LLGLTEHPELQLPLLFLFL/YMVTVVGNLGVTTLSGLSSHLHTPMYYFLS

SLSFTDLCYSTVITPKMLVNFVTEMNTIFYPECTTQLYFFLIFASAKCHM

LAAVAYECYVAIHNPLLYNVIMSYHICFWLTVGCIFWASLGLQFTQVLC*

NLFCKTNVVDHYFCDLFILLVLSCSGIYINELLVLV*VHLTFSLLPYLCL

PPTSSSLVAF/SSHIMAVTTFYGSTAFRYLHPSNVGSTDQGKVSSVFYTI

VVHMLNPMIYNLRNKDVKFVLKKILETKVCS

>LoafORs58.42

MAAGNHSIMTEFILAGLTDKPELQLPLFLFFLGTYVVTVVGNLGVITLIG

LSSYLHTPMYYFLSSLSFIDLCCSTVITPKMLMNFVTEKNIISYPECMTQ

LYFFIVFAVAECHMLAVMAYDRYVAICNPLLYNVTMSYQVCSWLVVEVYM

IALIGATAHTGCMLRVVFCKAKIINHYFCDILPLLELSCSSTYINEVVVL

CFTVFNVLTPTLAILGSYVSIIASILRISSIEGRSKAFSTCSSHILAVTV

FYGSVAFMYLQPSNVSSMDQSKLSSLFYTTIVPMLNPLIYSLRNKDVKVV

VNKIIKKRQFCISKDL*

>LoafORs58.43

MAAGNHSTTTEFILAGLTDKPELQLPLFLYFLGTYVGTVVGNLGMITLIG

LSSYLHTPMYYFLSSLSFIDLCQSTIITPKMLLNFMTEKNTISYPECMTQ

LYFFLVFGIAECHMLGVMAYDRYIAICNPLLYNVSMSYQVCSWLVVEVYM

MGLIGATVHTGCMLRVVFCKAKIINHYFCDIFPLLELSSSNTYINEVVVL

CFTSFNILAPTLAILGSYVSIIASILRISSTEGRSKAFSTCSSHILAVTL

FYGSIAFMYLQPSNVSSMDQSKVSSLFYTTIVPMLNPLIYSLRNKDVKDA

LNKIIKKRQFCISED*

>LoafORs58.44P

MDHRNRSLVTEFILSGLTEHPELQLPLFLLFLGIWLGGEPGHGHTDWVHI

SPAHPHVLFLSSLSYIDLCQSTVITPKCW*TL*QRRMPSPILNALKKKKV

LFFFFFCLTQLYFFLVFAIVECHMLAAMAYDCYVAICKPKLYDVILSYHI

CFWLTVGVYILGIIGSTVHTVFMLKLIFCETSVVSHYF*DLLPLLDLSCP

SIYINELFVLGLSAFNILTPALTLLASYIFIISSILHICSTEGRSKAFSI

CSSHISAVTIFYGSAAFMYLPPSTVSSMDLGKVFYTIVVPMLRPMIYSLR

KKDVKFALKTILGSRECS

>LoafORs58.45P

MRNCSVVTEFILLRIPHTEGLETMLFALFLSFYLFTLKGNLLILLAIVSS

TRLHAPMYFFLCELSVFDIFFPSVSSPKLLFHLSGNC*AISYAGCVSQLF

SYHFLGCTE*FLHTVMTYDCFVAICYPLHYTVTMSHRVCAILAMGTPFFG

CIQVTFLTTLTFQLPYCGPNEVDYYFCDIPVMLKLACGDTSTLKMVGFIS

VDLMPLSCSLLILTSYSRIVYSILQIRSAEGRRYASSTCSAHLTAILLFY

MPVVFMYLQPTSSPGFNATVQVLNNLVTPMLNPFIYSLQNKEVKSSLREA

LHQLGFLN

>LoafORs58.46P

HLHTHMYFFLGNSSVFDIGFSSVTCTILFLYLMRLSQLISY*DYFFQLFS

FHFLGSIECFLYT/VMAYDCFAAICYSLQYIPIMKPRIYMALAG/WLLRC

VHSSILTSLTFTLRLCGPNTVSRFFCDIPALLPLAFTDTSLAQKMSFTNI

GLLSLVCFLLILISYTHIIVSALSV/FSICSAHLIASLYIYRPIITVCQQ

LTFILGTVIQLLTNLVGPMLNPLIYTLRNEKVKIALKKIL

>LoafORs58.47P

MRNCTFVAEFILLGIPNTEGLENMLFVLFLSFYLFTLLGNLLIFLTILAS

SNLHTPMYFFLGNLSVFDIFFPSVSSPKMILCLMGHSRVISYQGCASQLF

FYHVLGGTECFLYTVMAYDRFVAICHPLRYTVTMSHRVCTGLTLGIWLG/

SGWGGCLHGSVLTFLIFKLPYCGPNELDNFFCDIPVVLPLX

>LoafORs58.48P

MKMRNHTAVTEFLLMGIPHTEGMENVLFVLFLGLYLLTLVGNLLILLAIL

TSPNLHTPMYFFLGNLSVFDIFFPSVSSPKMMLCLMGHSHAPS/TISFQG

CAAQLFLYHFLGCTECFLYTVMAYDHFAAICHPLRYTVIMSYQVCAILTL

STWLGSCAHASVLTFLVFKLPYCGPSEVNNFSCDIPVMLSLACADTSLAQ

TVSFTNVGVVALMCFLLILASYIHIVISILRISSSEGRRRAFSTCSAHLT

SILLFYGPVVLIYLRPASSLSLDTVVQVLSNIVTPSFNPLIYTLRNKDVK

LALKKVLIPEGHTC

>LoafORs58.49P

TMRNRTPVTEFLLMGIPHAEGMENVLFVLFLGLYLLTLVGNLLILLAILA

SSNLHTPMYFFLGNLSVFDIFFPSVSSPKMMLCLMGHSHTPS/HTISFQG

CATQLFFYHFGGCTECFLYTVIAYDCVAAICHPCDTRSS*PIECAPS*LW

APGW*AVCIPLSSHFSSLSYPTVGPNEVDNFFCNIPVILSLASADTSLAQ

SVSFTNVGVVAVMCFLLIFTFYTHVISVLRISSSEGRCRAFSTCSAHLTS

ILLFYVPVVLIYLRPASSPWLDSVV*VLSNFVTSSLNPLIYTLRNKDVKL

ALRKVLIPGRCAC

>LoafORs58.50P

TMRNHTPVTEFLLMGIPYTEGLENVLLVLFLGLYLLTLVENLLILLAILT

SSNLHPP/MYFFLGNLSVFDIFFPSMSSPKIMLCLMGHSHTISYQSCANE

LFFYHILGCTVCFLYTVMAYDSSAAICHPLQYSVITRHRVCAILALGTWM

GSCMHASVLTFLAFKLSYCDPNEVDNFFYDIPVMLSLACADISLAQMVSF

TNIGVVALMSFLLVLTSYTRIVISILRISSSEGRRRAFSNCSAHLTSILL

FYGPVVLIYLRPASSP*LDTVVQGLNNIVTPSLNPLIYTLRNKDVKLALR

KMQIPGG

>LoafORs58.51P

MRNHTELSEFILLGIPQTKGLETVRFVIFLFIYLFTLLGNLLILTAMVSS

STVHTPKYFFLGFLSILDLFFPSVTCPKMLFYLSGQSQAISYKGYAA*LF

FYHLLGCMEGCLYSVMAYDRFVAICHPLRYMLIMKPRVCMSLAMGAWLVG

CLDATILTFFTFHLTYCGANQLDYFFCDIPAFLPLASVDSSLAQRVGFTN

VGLLAVTLLLGICVSYTRIGIATLRIRSAEGRQKAFSTCSAHLTAILCAY

GPVIIIYLQPTPKPLLGAVVQILNNLVSPMLNSLIYSLRNKEVKSSLKSV

FHNVVFTV

>LoafORs58.52P

MRNCSVVTEFILLRIPHTEGLETMLFALFLSFYLFTLKGNLLILLAIVSS

TWLHTPMYFFLCELSVFDIFFPSVSSPKLLFHLSGNC*AISYAGCVSQLF

SYHFLGCTECFLYTVMAYDCFVAICYPLHYTVTMSHRVCAILAMGISFFG

CIQATFLTTLTFQLPYCGPNEVDYYFCDIPVMLKLACANTSTLEMVGFIS

VGLMPLGCFLLILTSYSCIVFSILQTHSAEGRRHAFSTCSAHLIAILLAF

MPVAVIYLQPTPNPSLNAAVQILNNLVTPMMNPLIYSLRNKEVKYSLRKV

L*QLKLLSEK

>LoafORs58.53P

MDHRNRSLVTEFILSGLTEHPELQLPLFLLFLGIWLGGEPGHGHTEWVHI

SPAHPHVLFLSSLSYIDLCQSTVITPK/PQMLVNFVTKKNAISYPECMTQ

LYFFLVFAIVECHMLTAMAYDCYVAICNS*LYDVILSYHICFWLTVGVYI

LGIIGSTVHTGFMLKLIFCETNVVNHYF*DLLPLLDLSRSSIYINELFVL

GLSAFNILTPALTILASYIFIISSILHMCSTEGRSKAFSICSSHISAVII

FYSSAAFMYLPPSTVSCMDQGKVSSVFYSIVMPMLNPMIYSLRKKDVKFA

LKKILESRECS

>LoafORs58.54P

MDHRNHSSLTEFILSGLTETPAAPFVPLLGIYVVTVLGNLDMIMLIGLSF

HLHTTMFYFLSSLSFITCHSTLINPK/PKILENFVAEKNTISYPECMTQL

YFFIIFAIAECHLLAAMAYDHYVAIPNPSLYVIMSYHISFWLSVGVYISG

IIGSTIHTHVMLKLFFCKTSVVNHYFSDLYQLLELSRSGIYVNELLVLGL

SAFNILIPALTILAFYIFIICSIHHIHSTEGRFKAFS/SSHILAITVFYG

SVAFMYLQPSNVSSMDQDKVFSVFCTIIPMWNPTIYSQRNKDVKFFLNNI

LESKVCS

>LoafORs58.55

MDTGNSSLVTKFILVGLTEYSKIQLPLFFLFLGIFIVTAAGNLGVITLIG

LNAHLHTPMYYFLFNLSFIDLCYSSVISPKLLVNFVLKMNIISYAGCMTQ

LFFYCFFVNAEIYVLTVMAYDRYVAICKPLLYTVTMSPQVCSVLAVIVYV

GAFVAAWAHTGCMLRLTFCDANKINHYMCDILPLLELSCTSTHINELVVF

TIMGFNVAVPCLTIIVSYAYILSSILHIHSREGRAKSFSTCSSHIIVVCV

FFGSGAFVYFHPSSVLSMDQGKVSTMFYTIVVPMLNPLIYSFRNREVKIA

LKKSFSRKAFS*

>LoafORs58.56P

DIGNSSLVTEFLLVGLTEYPKIQFPLFFLFLGIYIVTVAGNLGFITLIGL

NVQLHTPMYYFLLNLSSTDFCYSSVITPKLLVNFVSKMNLIS*AGCMTQL

FFYCCFLSAECYVLTVMAYHHYVAICKPLLYTVTMSPQTCSLLAVIVYVG

AFVGAWAHTGCMLRLTFCDANTINHYMCDILPLLELSCTSTLSNELVVFA

LVGFNIGVPSLTITVSYAYILSSIPHIHSREGSSKAFSTCSSHTIVVSVF

FGSGAFMYLHPSSVLSMDQCKVSSIFYTVVVFMLDPLIYNFRNKEIKIAL

KKSFSRKTFS

>LoafORs58.57P

MADENHSLVMEFTLVGLTSRPELQLPLFFLFLGIYLVTLVASLGLITLIS

HLHTPMYYFLFNLSFVDICYSSV/VFTPKMLMNFVLEKNTISYTECLTQL

YFFCFFAIAECYILTAMAYDRYVAICKPLLCNVILSPRISSLSVFGAYAM

GCWGSLAHTLCMARLAFCDANTINHYLCDILPVLQLSCTSTYTNEVVVFV

LVGMNILVSTSTTFISYAFIISSILHISSTLGRSKAFSTCSSHIITVSLF

FGAAAFMYLQPSDTESMDRGKVTSVFYTNVGPMLNPLIYGLRNKDVKLAL

KKTLKRKVF

>LoafORs58.58

MTTSNHSSVTEFILEGFTNNPELQLPLFLLFLGIYVVSVVGNLGTIILIS

ITTQPHSPMYYFLSHLSFIDLCYSSIITPKMLVNFVPEKNIISFLQCMAQ

LYFFLIFVIAEGYLLTTMAYDHYVAICSPLLYNTIMSHRVCSIMMVVVYS

LGLFGATVHTTHMSMLFFCEPHIVSHYFCDVIPLLTLSCCSTHINEILLF

AIGGINALAPTLAVLVSYAFILSSILCICSTEGCSKAFGTCSSHLMAVGI

FFGSIMFMYFKPSSSNTMEQEKVSSVFYTTVIPMLNPLIYSLRNKAVKSA

LRNAVGGRYSSSQWGFS*

>LoafORs58.59P

MTTSNHSSVTEFILEGLTNNPELQLPLFLLFLGIYVVSVVGNLGIIILIS

ITTQLHSPMYYFLSHLSFIDFCYSSVITPKMLVNFVSEKNVISFLECMA*

LYFFLIF/FVIAEGYLLTAMAYDHYVAICSPLLYNTILYNTIMSHRVCSI

MIVVVYSLGLFEATVHTTHMSMLSFCGSHTVSHYFCDIIPLLTLSCSSTH

INEILLFIIGGVNTLAPTLAVLISYAFILSSILCIHSPEGRSKAFGTYSS

HLMAVGIFFGSITFMYFKPPSSNTMEQEKVSSVFYTTVIPMLNPLIYSLR

NKDVNSALRKVVGGR

>LoafORs58.60

MSRGNLSTTIKFVLVGLTEQPELQLLLFLLFLGIYVATVVGNLGLIALIA

ISPLLHIPMYYFLSSLSFIDLCCSSVITPKMLVNFLGKNNMILYSECVAQ

LFFFAVFVVAEGYLLTAMAYDCYVAICSPLIYNVIMSPRVCSLLVLVVFI

LGFLSALAHTSAMMKLSFCKSHIISHYFCDILPLLNLSCSNTHLNELLLF

IIAGFNTLVPTLAVFISYAFIFCCIFHIRSSKGRSKAFGTCSSRLMAVGI

FFGSITFMYFKPPSSNSLEQEKVSSVFYTTVIPMLNPLIYSLRNKDVKKA

LSKVLVGR*

>LoafORs58.61P

ITKQNDSTMTEFVLEGLTDKPELQLSSSSCS*GSMGSL*WEIWV*SSSSL

SIPSSHVLFSL*VVIPRSFFGNLGGLVVKCYGR*PRVGSSNPPGAPWKLY

RAVLLCPIGLL*VEIDLRAVG*GGVDLFYSSVVTPKVLGSFVFEKNVISY

PGCMTQLFFFCVFATAECYMLTTMAYDRYIAISTPLLY/PTALQVTMSQK

VCNVLATGVYIIASSGAMAHTVFMTRLSFRENNVIHLYFCDIIPLLKLSC

SRTYINELLVILIGGFNVLATTVPIIISYGFMLSNILRIPSAEGRLKTFV

TCGSHLTAVGFFYGSMIFICFKPAFKNMAQEKV/ASVFYTSVIPMLNALI

YRLKEKDVKNVLSKVMVMRYGPLQVSIQDH

>LoafORs58.62

MTTSNVSSVTEFILEGLTNLPELQLPLFLLFLGIYVVTVVANLGMIILIA

ISSQLHSPMYYFLSHLSFIDLCYSSVITPKMLVNFVSEKNVISFLECMAQ

LYFFLSFAVAEGYLLTAMAYDRYVAICSPLLYNTIMSHRVCSIMMGVVYS

LGLFVATVHTMHVSILSFCGSRIVSHYFCDIIPLLTLSCSSTHIDEILLF

IIGGINALAPTLAILISYAFILSSIPRICSTEGQSKAFVTCSSHLIAVGI

FFGSITFMYFKPPSSNTMEQEKVSSVFYTTVIPMLNPLIYSLRNKDVKSA

LRKVVGGR*

>LoafORs58.63P

EMAKQNDSTVTEFVLEGLTDKPELQLPLFLLFLGTYGVTVVGNAGMILLI

TFSSKLQSPMYFFLSNLSSIDLFYSSVVTPKLLGNFESEQSIISYAGCMT

QLFFFCVFAIADSYMLTIMAYDRYVAICNPLLYNVTMSQKVCNVLVTGVY

IIASSGSMAHTIVMTRLSFCEDISSTIISVT*FPS*SSHAPELISNELLV

IIVGGFNALATTVPIIISYAFILSNILRIPSAEGRSKAFGTCGSHLTAVG

VFYGSIIFMYFKPASNNMAQEKVASVFYTTVIPMLNPLIYSLRNKDVKNV

LSKVMVMRYGPLQV

>LoafORs58.64

MARQNDSTVTEFVLEGLTEKPELQLPLFLLFLGIYGVTVVGNMGMIFLIT

FSFKLQAPMYFFLGNLSAVDLFHSSVITPKLLENFVREKNVISYPGCMTQ

LFFFCFFATAESYILTAMAYDRCAAICSPLLYNVTMSQKVCNVLVTGVYI

MASIGAMPHIISMIMLFFCKDNVIHHYFCDILPLLKLSCSTTYINELLVI

LVGGFNVLATTMAIIISYAFILCNILRIPLAEGKSKAFSTCGSHLTAVGV

FYGSIIFMYFKPSSSSNMAQDKVASVFYTTVIPMLNPLIYSLRNKDVKDV

FSKIMGMRYGPLQGSNQNH*

>LoafORs58.65P

IAKQNDFTVTEFILMGRTDKPELQLPLFLLLLGIYGVTVVENMGKILFIT

FNSKV*SRMYFFLVICQSWISFIPPLLPPNSWEAKCYFLC*MYDTAFFFL

LSFCCC*VLCANCHACDRYVAICSPLLYNITRS*KVCNMLVTEIYIMTTF

GAISYTASLIRLFFCRVNVIHITSVTYLLSQSSHGPVPTSMSFC**L*VD

SMC*ECLWPS*SLKSSYFSTFFKYTH*RAFLKHLVPVALNLQLFLFFLID

PPYSYILSQHLAATCLRRLWPLCSKLQVIPMLNPFIYCLRNKYIKNVLSR

VM

>LoafORs58.66

MARQNNSTVTEFVLEGLTDRPELQLPLFLLFLGIYGVTIVGNLGMIFLIA

FNSKLQSPMYFFLGNLSFLDLCYSSVVTPKLLGNFVQEKNVISYPACMTQ

LFFFCVFAIAECYMLTAMAYDRYVAICSPLLYNVTMSQKICNVLVSGVYI

MASFGAMIHTIFMARLSFCEDNIIRHYFCDILPLLKLSCSSTYINELLVI

TGGGFNMLVTTVAIIISYVFILSNILRIPSSESRSKAFSTCGSHLTVVGV

LYGSMIFMYLKPASSGNMAQKKVASVFYTTVIPMLNPLIYSLRNKDVKNV

LSKVMVMRYGIWNDSNQNH*

>LoafORs58.67

MDIGNHSSVNEFILEGLTDEPGLQIPLFLLFLFIYIISMAGNLGLVFLIS

ISSQLHTPMYYFLSNLSFIDLCYFSVIIPKMLVNFMSEKNFTSFPECMVQ

LFFFCFFGIDDSYMLTAMAYDRYVAICNPLLYNITMSHRVCFLLITVVYI

VGAIGGLVHTSYISSRSFCGTNVILHYFCDILPLLSISCSRDYTKELLVM

ILVSFNVFICAIAIFLSYAFILSSILCIHSAEGRAKAFSTCSSHLAAVGV

FYGSIIFMYFKPPSVSDTTQEKVASVFYTTVIPMLNPLIYSLRNKDVKEA

LKKILTNGIFSKTL*

>LoafORs58.68

MRNVSMVTEFILLGIPHTEGLGTILFILFLSFYLFTLTGNLLILLTIVSS

SRLHTPMYFFLCKLSVCDIFFPSVSSPKMLFYLSGNSRAISYTGCVSQLF

FHHFLGCTECFLYTVMTYDCFVAICYPLRYTVIMSHRVCAILPMGTSFFG

CIQAIFLTTLTFQLPYCGPNEVDYYFCDIPVMLKLACADTSTLEIVGFIS

VGLMPLGCFLLILTSYSCIVFSILQIRSAEGRRHAFSTCSAHLTAILLAF

MPVAVIYLQPTPNPSLNAAVQILNNLVTPMMNPLIYSLRNKEVKYSLRKV

L*

>LoafORs58.69

MRNVSMVTKFILLGIPHTERLESILFILFLSFYLFTLMGNLLILLAIVSS

SRLHTPMYFFLCKLSVCDIFFPSVSSPKMLFYLSGNSRAISYAGCVSQLF

FHHFLGCTEGFLYTVMAYDCFVAICYPLRYRVIMSHRVCAILAMGTSFFG

CIQAIFLTTLTFQLPYCGPNEVDSYFCDIPVMVKLACADTSALKMVGFIS

VGLMPLGCFLLILTSYSCIVFSILQIRSAEGRRRAFSTCSAHLTAILLAF

MPVVLIYLQPTPNPSLNAAVQILNNLVTPMLNPLIYSLRNKEVKYSLRKV

LQQLDLLSEK*

>LoafORs58.70P

MRNVSMVTKFILLGIPHTERLETILFILFLSFYLFTLMGNLLILLAIVSS

TWLHTPMYFFLCKLSVCDIFFPSVSSPKMLFYLSGNSRAISYAGCVPQLF

FYHFLGCTEGFLYAMMAYDCFVTICYPLRYTVITSNRVCAILAMGTSFFD

CIQAIFLTTLTFQLLYCGPNEVDYYFYDVPVMLKLACADTSTLEMVGFIS

VGLMPLSCFLLILTSYSCIVFSILQICFAEGQCRAFSTCSAHLTATLLAF

MSVVLIYLQPTP/NAAVQIQNKLVTPMLNLLIYSLRNKEVKYSLREVLQQ

LDLLSEK

>LoafORs58.71P

MAVGNHSTVTEFIPTGLREKPELQLPLFLFFLGIYVIAVVGNMGMATLFE

LTSCLHTPMYYFLSSLSFIYLCHSSVIIPKMLVSFETE/NTISCPECITQ

LYFFLIFAIAEGHKLAAKTYDHYVAIYSPLLYNVIMSPQACFYLIFGVYI

IGLVCASVHTG*IFRFHFSKFDIINHYFCYLLFLLNLLCSSTYVNELLLL

ILSTFNILAPRLTILGSYIFIIASILCFCSTEGRSKVFSICTSHILTASI

FYGSAAFMNLQPSSVISMHQEQVSSLFYTMAVPMLN/LIYSLRNKNVSVV

LRKMLVKIT

>LoafORs58.72

MAAGNYSTVTEFILAGLTDKPELQLPLFFFFLGVYVVTVVGNLGMITLIG

LSSHLHTPMYYFLSSLSFIDFCQSTVITPKMLVNFVIENTISYPECMTQL

YFFLFFAVSECYMLAAMAYDRYVAICSPLLYKVIMSPQVCSWLILGVYIV

GLVCASAHTGCMLRVHFCKFDVISHYFCDLLPLLKLSCSSTYVNELLILG

FGAFNIFAPTLTIIGSYVFIIASILHMRSTEGKSKAFSTCSSHILAVTIF

YGSLAFMYLQPSNVSSMEEGKVSSVFYTIVVPVLNPLIYSLRNKDANVAL

KKMLEKRTFS*

>LoafORs58.73T

IMSYHVCFWLTRAVYILGIIESTIHTGFMLKLFFCNTNVVNHYFCDLFPL

VKLSCSSIYINELLVLGLSAFNILTPALAILVSYIFIISSILHIRSTEGK

SKACSTCSSHISAVTIFYGSAAFMYLQPSNVSSMDQGKVSSVFYTIVVPM

LNPMIYSLRNKEVKFALKKILESRACS*

>LoafORs58.74P

MDHRNHSSVTEFILSALTEYPELQLSLFLLFLGIYVVTVVGNLGMITLVG

LSSHLHTSMYYFLSSLSFIDLCQSTLLTPKMLVNFVDREGTLSPTLNA*L

SSIFFIFFAIA

>LoafORs58.75

MTSGNHSTVTVFIIAGLTEKPELQLPLLFLLLGVYVITVMCNMGKITLIG

LTSHLHTPMYYFLSSLSFIDLCLSTVITPKMLVSFVTENTISYLECITQL

YFFLIFAIAECHMLAAMAYDRYVAICRPLLYNIIMSPQVCLYLIFGVYII

GLVCASAHTGCIFRVHFCKFDVINHYFCDLLSLLNLSCSSTYVNELLILI

FSTFNILAPSLTILGSYVFIVASILCIQSTEGRSKAFSTCSSHILAVVIF

YGSAAFMYLQPSSVSSMDQGKVSSVFYTIVVPMLNPLIYSLRNKDVTVAL

KKMLEKRTFL*

>LoafORs58.76

MATGNHSTVTEFILSGLTDKPELQLPLFLFFLGVYIITVVGNLGMITLIG

LSSHLHTPMYYFLSSLSFIDLCFSTVITPKMLVNFVTEKNIISYPECISQ

LYFFLIFAASECYMLATMAYDRYVAICSPLLYNVIMSSQVCLCLVLGVYM

LGLVCASAHTGCMLRVHFCKINVINHYSCDLLPLLKLSCSSTYVNELLIL

GFGAFNIFAPTLTILGSYVIIIASILHIHSTEGKSKAFSTCSSHILAVAI

FYGSAAFMYLQPSSVSSMDQRKMSSVFYTIIVPMLNPLIYSLRNKDVNVA

LKKILEKRTFS*

>LoafORs58.77P

MDHRNHSSVIEFILW/GLTEHPELQLPLFFLFLRIYVVTVVGNLGMIMLI

GLSSHLHTPMYCFLSSLSFIDLCQSTVITPKLLLNFVAEKYFISYPERVT

*LYFFLVFAIAECHMLAAMAYDHYVAICNPLLYNVIMSYHICFWVTAGMY

ILGTTGSTIHTGFMLKLFFCKTNVVNHYFCDLFPLLELTCSSIYINELLV

LCLSAFNILTPALTILASYIFIINSILHICSTEARSKAFSTCSSHILAVT

IFYGSAASMYLQPSNVSSMDQGKVSSVSYTIVLPMLNPMIYSPRNKDVKF

ALKKILESREYS

>LoafORs58.78P

LSAHPHVYFLSSLSFIDLCYSTVITLKMLESFVIEKNTISYPECMTQLYF

FPFFFFYYIRMSYAGCDDM*SLCCHL*PIALQCHHVLPSLLLVW*VIYDG

LDWCHSSYRCMLSVIFCKAKMINHYFCDLFPLLELSCSSTYINEPVLLCF

SAFNILALTLAILGSYVSIIASILRIRSTEGRSKAFSTCSSHILAVTIFY

DSLAFYVPAAIKCHLHGPRQSVFGVLHHYRANAEPLIYSLRNKDVKVALN

KIIEKMLLFINKD

>LoafORs58.79

MAAENHSTMTEFILIGLTEKPELQLPLFLFFLGVYVVRVVGNLAMITLIR

LSSHLHTPMYYFLSSLSFIDLCHSTVVTSKMLVSFVTEKNTISYPECMTQ

LYFFLIFIISECHMLPVMAYDRYVAICNPLLYNVTMSYQACSWLVVEVYM

MGLIGATAHTGCMLRVFFCKAKIINHYFCDLFPLLELSCSSTYINELVVL

CFSAFNILGPTLAIVGSYVFIIASILLICSTEGRSKAFSTCNSHILAVTL

VYGSAAFMYLQPSNVSSMDQGKVSSVFYAIFVPMMNPLIYSLRNKDVKVA

LSKIIEKRLFCISKSL*

>LoafORs58.80

MASGNRSTVTEFILSGLTDKPELQLPLFLFFLGVYMVTVVGNLGMITLIG

LSSHLHTPMYYFLSSLSLIDLCYSTVITPKMLMNFVTENIISYPECMTQL

YLFIFFIVSESHMLAVMAYDRYVAICKPLLYNVTMSYQICSWLVVEVYMM

GLIGATAHTGCMLMVVFCKAKVINHYFCDIYPLLELSCSSTYINEVVLLC

FSLFNILAPSLTIVVSYVSIIASILQIHSTEGRSKAFRTCSSHILAVTIS

YGSAAFMYLQPSNVSSMDKSKVASVFYSIIVPMLNPLIYSLRNKEVKVAL

SKIIEKRLFCISKDF*

>LoafORs58.81P

MAAGNHSTVTEFILAGLIEKPELHFSLFLFFLGVYMITVVGNLGMIALIG

LSSHLHTPMYYFLSSLSFIDFCYPTAITPKMLVSFVTENTISYPECMTLL

YFFAFFIISECPMLAVMAYDRYVAICKPLLYNIIMSYQVCSWLVVEVYMM

GLIGAAVHTARMLRVVFCKAKIINHYFCDVFPLLELSCSSTYVNEVVVLC

FSLLNFLAPTLTILGSYVSLIAS/RIHSTEGRSETFSTCISHILAVTIFY

GTAAFMYLQPSNVGSMDQGKVSSVFYTIIVPMLNPLIYSLRNKDVKVALN

KII*KRLFCISKDL

>LoafORs58.82

MAAGNHSTVTEFILAGLTDKTELQLPLLLFFLGVYVVTVVGNLGMITLIV

FSSHLHTPMYYFLSSLSFIDFCYSTVIAPKMLVNFVTEKNTISYPECMTQ

LYLFAFFIISECHMLAVMAYDRYVAICNPLLYNVTMSYEVCSWFVVAVYM

MGLIGATAHIVCMLRVVFCKAKIINHYFCDLFPLLELSCSSTYINEVVIL

FFSVFNILAPVLAIFGSYVSIIASILRISSTEGRSKAFSTCSSHVLAVTI

FYGSAAFMYLQPSNVSSVNQAKVSSVFYTTIVPMLNPLIYSLRNKDVKVA

INKIIEKRLFCNGKDF*

>LoafORs58.83

MAAENHSTVTEFILVGLTKKPELQLPLFLFFLGVYVVTVVGNLGMITLIG

LSSHLHTPMYYFLSSLSFIDLCYSTVITPKMLVNFVTEKNTISYPECMTQ

LYFFLIFIISECHMLAVMAYDRYVAICNPLLYNVTMSYQVCFRLVVAVHM

IGLIGATAHTGCMLRVVFCKAETINHYFCDVFPLLELSCSSTYINEVVVL

CFSLLNCFVPTLTILGSYVSIIASILRIRSTEGRSKAFSTCSSHILAVTI

FYGSAAFMYLQPSNVGSMDQGKVSSVFYTIIVPMLNPLIYSLRNKDVKVA

LNKIIEKRLFCISKDL*

>LoafORs58.84

MAAGNHTTVTEFIFLGLTENPEFQLPLFIFFLGVYAVTVVGNLVMITLIG

FSSHLHTPMYYFLSSLSFTDLCYSTVITPKMLVSFVTKNTISYPECMTQL

YFFIFFIISECHMLAVMAYDRYVAICNPLLYNVTMSYQVCSWLVVVVYMI

GLISATANTVCMLRVVFCKAKIINHYFCDIYPLLKLSCSSIYINEVVVLC

FSVFNILAPISTILGSYVSIIASILRIRSTEGRSKAFNTCSSHILAVTIF

YGSAGFMYLQPSNVSSMDQGKVSSVFYTIIVPMLNPLIYSLRNKDVKIAI

NKIIEKRLFCINKDL*

>LoafORs58.85

MAAGNHSTVTEFILAGLTDKPELQLPLFLFFLGVYMVTVVGNMGMITLIG

LSSHLHIPMYYFLSSLSFIDLCYSTVITPKMLVSFVTEKNTISYPECMTQ

LFLFIFFIVSESHMLAVMAYDRYVAICNPLLYNAAMSYQVCFWLVVEVYM

MGLIGAAVHTGCMLRVVFCKAKIINHYFCDLFPLLELSCSSTYINVVVLL

CLSVFNILAPTLTIFGSYVFIIASILRIHSTEGRSKAFSTCSSHILAVTL

FYGSAAFMYLQPSNVSSMDQSKVSSVFYTIIVPMLNPLIYSLRNKDVKVA

LNTIIEKGLFCISKDF*

>LoafORs58.86

MAARNHSTVTEFILTGLTDKPEIQLALFIFFLGTYVVTVVGNLGMITLIG

LSSHLHTPMYCFLSSLSFIDLCCSTVITPKMLVNFVIGKNIISYHECMVQ

LYFFLVFAIAECHMLAVMAYDRYVAICNPLLYSVTMSYQVCFWLVVEVYI

LGLVGATAHTGCMLRVIFCKAKIINHYFCDVFPLLELSCSSTYINELVLL

CFSAFNIFAPVLTILGSYVSIIASILRIRSTEGRSKAFSTCSSHISAVTI

FYGSLAFMYLQPSTLSSMDQGKMSSVFYTIIVPMLNPLIYSLRNKDVKVA

LNKIIEKRLFCFNKDL*

>LoafORs58.87

MAVGNHSTVTEFILAGLTKKPELQLPLFLFFLGVYVVTVVGNLGMITLIG

LSYHLHTPMYYFLSSLSFIDFCYSTVITPKMLVNLVTEKNTISYPECMTQ

LYFFLFFVISECHMLAVMAYDRYIAICKPLLYNVTMSYQVCSWLVVEVYM

MGLIGATAHTVCMLKVIFCKAKIINHYFCEVFPLLELSCSSTYINEVVLL

CFSTFNILAPALAILSSYVFIIVSILRICPTEGRFKAFSTCSSHISAVTI

FYGSAAFMYLQPLNVSSMDEGKVSSVFYTIIVPMLNPLIYSLRNKDVKDA

LNKIIKKRLFCISKDF*

>LoafORs58.88

MAAGNHSAVTEFILAGLTEKPELQLPLFLFFLETYVVTVVGNLGMITLIG

LSSHLHTPMYYFLSSLSFIDLCYSTVITPKMLVSFVTEKNTISYPECMTQ

LYFFVFLIVSECHMLAVMAYDRYVAICNPLLYKVTMSDQVCSWLVVEVYM

MGLIGATAHTGCMLRVVFCKAKIINHYFCDVFPLLELSCSSTYINELVLL

CFSVFNILGPTLAILGSYVSIIASILQIHSTEGRCKAFSTCSSHILAVTI

FYGSIAFMYLQPSKVSSMDQSKVSSVFYTIIVPMLNPLIYSLRNKDVKVA

LNKIIEKRLFYLSKDL*

>LoafORs61.1

MKTENQTFGAEFILLGLFQYGQMNKTLFVAITVIFSVALMGNIILIHLIR

LDTLLHTPMYFLLSQLSFIDMVYISTTVPKMVTNFLSNGKTITFFGCEIH

TFLFLTLGGTEALLGFMSYDRHVAICHPSHYPVLMSKTICLSMVTCAWAS

SSINALIHTLYVFQLPFCTSRIINHFFCEVPSLMPLVCQDTSQYEYTVLF

SGLVILLLPFMAILASYAQVLIVVYQMSSGKGQTKAISTCSSHLIVASLF

YGATLSTYTRPHSLNYPEEDKVVAVFYSIITPLLNPFIYSLRNKEVMGAM

RRVLGK*

>LoafORs61.2P

MKTENHSFGAEFILLVLFQYG*TNTVLFVAVSIFFSAALVGNI/GEYQTI

HLIRLDSRLHTPMYFLLNQVSFTDMTYISTTVHKMAANFLSNRKTMTFLA

CEIQTFLFLTLDGTEALLLGFTSYVRYVAICRPLHYPVLMSKTICLSMVT

CAWASSSINALIHTLHVFQLPFCTSQIINYFFCEVPSLMPLVCQSTSQYE

YTALFSGLITLLLPSVAILASYAKMLIVLYQMSSGKGQSKAISMCSSHLI

VASLFYGMGISTYMRPHSLSNSEQEKVVAVFYSIITPLLNPFIYSLRNKE

VMVAIKRLIG

>LoafORs61.3P

YLKHLSFLEIWYTSTIVPLLLANLLSWGQVISSACMAQLYFFVFFGATEC

FLLAMMAYDRYLAICCPLHYSFLMSPDICAKLVAISWLTGIGTGFLPSLM

ISKLEFCGPNQISHFFCDLLPLMQLSWSSIYITELVIFILSIAVLCICFL

LTLVSYVFIVSSILRIPSVSG/IISVFYTVVAPLLNPVIYSLRNKDFKEA

VRKVMRRKCGIYGVRVKGSVFIR

>LoafORs61.4P

MSSHTVVTDSLLVGFCDISQLQILQAMLFLLTYFATGLGELIIIILTSLD

EQLYMLMYFF/LDLSFISTIVPKSIHNPLTQHSSICFPGCATQMFSMTVS

TATELFLLTVMPYDQFTPICHPLHYEVIMN*GACVRLMVSC*LTGSLTAI

MHTVVIFSLTFCESNVHQFFCDIPQLIYIPCPGQLSRETMPILISVILTL

GCFVCIIVSYGYVFCTVLRIPSKTGQSNRFLPACPIWLLQDFFSWFCNVF

KAKSTIPCLTDRIFSLFYTIVYPTLIPVIYCLRNKDIKIALRRLI

>LoafORs61.5

MMNFSTVSTFVLLGFGGGPGMQAILFLIFLILYVSSVVGNFGMILIIKVY

SHLHTPMYVFLQSLSLLDICYCSTIAPRALVNFLQKDHTVSFGGCAAQFF

FLSLFGTTEAFLLAAMAYDRYIAICNPLQYSVSMSHQVCVCLVVGSYLWG

LVNAVTQTTMTFTLPFCGSNEINDFFCDVPPLLSLSCSDTFINQLVLLGL

CGSIIVSTFLIVLVSYICIISAILRIHTVQGRQKAFSTCASHLTGVCLFF

GTVFFMYAQPSATFTMDQSKVVSIFYTIVIPMLNPLIYSLRNKDVKQALR

SSRQKLSL*

>LoafORs61.6P

VERGNQAVSSDFVLLGLPSSAEQQHCLSVLFLCMYICFTS/FFFFSFTST

TIPQMVVNSSTGTRTISFSGCLTPLFFFISFVTMDSLILCVMAYDRYAAI

CHPLHYTTLINSHLCVHFVARPWVVTYPHALLHPALTAHLSFCASNIIHH

FFRD/LQLSCSDVSFNLMVICTVGGLLAFIRLICITMSYGFIFSTILKIT

STQGKQRAFSICGCHLSVVVLFYGTVSAVYFSPSSSHTPERDTLSAIVYT

/YHGDSDAESFHLQSKE

>LoafORs61.7P

LFFLKGFSDVREIQILHAVLFLLIYLAAVLGNVLIIIVTAKDH*PHSPIY

FFLKNLSFLDLCLISIAIAKSITNSLANHNIISFLRCVLQVFFFFLVATT

EVSLLTVMSHDHYVAICHPLRYEVLMSHGACVQMAAASWVSGVLTAILHA

ASTFSRPVCGSPEVHQFFCDVPQLLSLICSYDIVE*VVIVLRLVLYFGCF

VLIDISCIHTFSTVLRIPSREGRSRAFSTCLPHLTVVTLCFPVFVFFF/L

FSGFCFFFFAYLLPLPKSPSSLDLLVSVFYTMVPPTMNPIIYSLRNKDMK

MPLKKLLKSRHCPSN

>LoafORs61.8P

MKMTEFMKKLNKTNILEFILVGFSDDLAQQPVLFSLLLFIYLTTMIGNLL

IILTIVSNAHFHSPMYFF/FTPLCIFFLSNLSLIDLCLSSTTVPKMVADT

QTGNPTISFNGCLIQMYMFLCFSGLETLLLSIMSYDRFVAICLPMYYLAI

MTPKFCALLVVSSWIFAIFRAQIHTILLVQLSFCEDNKIPQFFCDIGALL

KLSCSDTYINELFIFIEGGLVVVVSF/FHVFFSYLCGPLIYTIITIIGVY

LCPSTTRTAERDKTAAVMYTVVTLLLNPFIYSLRNGNLRGAIRKTIQRKL

FL

>LoafORs61.9P

MGFSDTDELQILHAMLFLLIHMTALMGNILIFTLTSLDQHLSTPMYFFLK

HLCFLDSCFVSVIVPKSIINSRTHTRCISFLGCATQLFLVLYLAFSELVL

LTVMAYDHYMAICHPLHYEVIM/MYTSTTLSLTFCGFLTQQFFLMKISSV

NTHLVKPVMTAIIFFLVLRCFISIIASYTYILLPVLRIPSTQGRSKVFLT

CLPQLLMTLFFSTGTTPYLIPNSDNPFFQDLLLSVFYPMVTPTLNPIIYS

LRNKDIKDALRK

>LoafORs61.10P

TTGPMSSCVSQVFLLILSATTEVSLLTVMSYDHYVAICHPLRYEIIMSHG

ACVQMAASSWVCGVLNAILHTAPTFSMPVCGSPEVHQFFCDVPQLLSLTC

SYNTVELVVIGLNMVLDFG*FVFTDIS*SCIFSSVLRIPSREGRSRAPHA

CLTSLL*LSFSYLFFFFFSPIYHPYPNLHHP/VKEQALPFKLGGLMSHIS

>LoafORs61.11P

MNNFTSVTMFFLIGFSDVWEIQILHAVLFLLIYLAAVLGNILIIIVTAED

HGLHTPMYFFLKNLSSLDLYLISITVPKSITNSV*SHHHLISQLCV

>LoafORs61.12P

MDVTNQTTVREFIFLGFSAVPQLRLTLFVVFLIVYLLSLVGNTLIIFIVL

MDSTLQTPMYIFLENLSFLEIWYTTATVPKLLATCFHRL/LSQVVTISIS

GCITQYYFFFSMGATECILLAVMAYDRYLAICNPLHHSLLMSLQICLWFS

AGSWIGGFIAPLLPTVLVSYLNFCGPQKINHFFCESDPIFKLSCSDTFLV

EALGYTCTSVVILSSFLLTMSSYGHIVFTIIRLSSWETQKKTVSTCASHL

TVVSIYYGTIIFAYVHPPAKYNFTIGKVVSVFYCVVTPLVNTFIYTLRNK

DVKKAFRTTLARKRLLWARNMQDF

>LoafORs61.13P

EFLLMGFPGDWVIQTLHAALFFLMYLAALMGNLLIFTLTTVDQHLQTPMY

FFLKNLSLIGICYFSVTFPKSTTNTLTNRHSISFLGCASQLFLVIFFTGT

GFALLIVMSYDRYVAICHPLHYETIMNRRCLCADGDCI/GACVQMVTASW

LGGCAYGSIHVAGTFSVNFCGSNVVHQFFRDVPSLLTLACYGEHILEYAF

IIASCCFVFVCFILMVVSYVHIFSTVLRIPSAKGRVKTFSTCMPHLTVVT

LFFFSGIITYLAKNLKSSSSLKMLISALYTV/FTLLPPTLNPLIYSLRNK

DMQMALEKLIAGKI

>LoafORs61.14P

MPEKLANVTIIMEFLLVGFPDDWML*RLYAALFFLIYLTALTG/DLLIVT

LTTIDHHLYAPMYFFLKNLSLIDICFISVTVPKSIMTSLTKSHSISFLGC

ASQIFLFIFLGGAQSMPSW*SCPMTAMLPSAILCAMRPL*IEAPVCRW*L

HHGGFVYGSIHVAGTFSVNFCGPNIVHQVFCDIPSLLKLACPGEQILEYA

FIIASFSFAFLCFLFVIVYYVHIISAVLRIPSAQDRFKTVSFCMSHLTVM

TLFLCSGI/LLAYLGTNYKSASSLDLFMSVLYSVLPPSLNAVIYSLRNRD

MKAALGKLLGGKMLLK

>LoafORs61.15P

MSLKFLQTKISMPQKIANITEFLLVGFPDDWILRKLYTALFFLIYLTALM

GNLFIVTLTTIDQHLQAPMYFFLKNLSLIDMCYFFVL/IFLFYISTTVPK

FIMNSLTNSHSISFLGCASQVFLVIFFVGTEFALLIVMSYDLYIAICHPL

HYETIMNRGACVQMVTASWLSGCAYGSIHVAGTFSVNFCGSNIVHQFFCD

IPSLLTLACSGEHILEYAFIIVSCCFAFVCFILMVVSYVHIFSSVLRIPS

TQGRYKTVSTCMPHLTVVTLFLSSGFIAYLGSTSESPSSVNLFMSVLYSL

LPPTLNPVIYSLRNRNMKVALSKIFCGEMASKM

>LoafORs61.16P

MANVTMEMEFFFMEFAHTKDLQVLHILLFLLIYLVTVTGNLLIIVLVTLN

QYLHTPMYFFLKNLSFFDLCLISIIVPKSILNSLTNKNTISLPGCVLQVF

LVIHFAGAEVFILTAMSYDRYVAICHPLHYEAIMSRGVCLRMAAASWFFG

GSFGSLYSAGTFSLSFCGSRNLP*FFCDVPSLLKMSCSKSHITITVSVAI

GVFYGFFCLLAIVFSYTCIFNTVLSIPSFQGRSKAFSTCLPHLTVVTTFL

LTGAIAYLKPVPLSPSLLDLLLSALYSVLPPTLKPIIYSLRNKEIKAALK

KL

>LoafORs61.17

MTNHTLIMEFLLMRFTESWMLLRLHAAFFSLIYLVATMENVLIMLLTILD

QRLHTPMYFFLRHLSFLDLCLISATVPKSILNSITFTDSISFLGCVLQLF

LVVLLAGSEIGILTAMSYDRYVAICRPLHYEAVMGKRACVQMMAVSWFNG

GALGILYSAGTFSPNFCGTNKIHRFFCDVPALLQLTCSKEHATINVSVSI

GICYAFSCLVCIVVSYVYIFSTVLIIPSRQNQSKAFSTCLPHLIVVSAFL

VTGAVAYLKPVSDVPSLLDLLVSMFYSVVPPTLNPIIYCLRNKNIESALG

KVLWNVRNT*

>LoafORs61.18P

LGFPGSQALQISLFMLFLVMYILTVGGNVAVLILVSTSHQLHTPMYFFLS

KLSFLEIWYTTAAVPKALAILLGKSQTI*FTGCLLQMCLVFSLGCTEYFL

LAVMA*DHYLAICYSLHYGAIMSSLLSAQLALGSWVCGFLAIAVPTALIS

GLSFCGPHAINHFFCDIAPGL/PWIAVACTSTQAVEVVAFVIAFLVILSS

CLITLVSYIFIISTILRIPSATGQSKAFSTCSSHLTMVLIWYGSTIFLHV

RTSIKDTLDLSKAVHILNTVVTPVLNPFIYTLLNKEVRETVLKKRKRK

>LoafORs61.19P

PMYVLLLALAIVDIICITTNVIPKMLWTILTLEKTISCGGCMSQLFFFMW

SLGTEMIPFTTMAYDHCVAICSTLCYSTVMNHHMCLALLSIVIAIAVTSS

WVHMGLILKVTFCGPNTIDHFCEIPLLLALSCSPVTVNKLVVCTLLTSPL

PLVTSPSSSMVLLLLLFSESA*QKAKRRPLQGSSHLIVVSLYYSPVIYIY

IHPATSYTFDKAKVVVALYTIVTPTLNLIVYSFRNKEMQVGIKKVFAS

>LoafORs61.20

MDIYNQTAITEFILIGLSDLPEVRYPLFVVFVAIYQVTLVGNGAILLAIG

TEQKLHTPMYYFLANLSLLDIFCPSATVPKMLKNLLTKNQSISFVGCALQ

LFFLVALAGTEVFLLAVMAYDRYVAICFPLRYTLIMTKGHCVKLTAGTWA

SGFLNSLLHTVFTFRLSFCKSNQVNQYYCDIPPVVALSCSSTYVAEMLVS

VLGGVLGISTFLITGISYIYIISTILKIRSAEGRRKAFSTCASHLLVVCL

FYGTTIFTYIRPSSSHHSSARGRLISMLYGVITPMLNPLIYSLRNTEVKG

ALRKVLCHKICLKQG*

>LoafORs61.21P

MEDNKRENISTITYVILLEFGDLKEVGTALFSLFLSLYVVTLCGNLLLIL

AVQANPHLHTPVYFFLCHLSFVDVGYTSSIAPQLLREVLAGGVTISFTAC

VVQFYAVGALLTVECFLLAIMSYDCYLAICWPLRYSVLMDSRTCVKLAVG

SWIGGFLFVGAVLILLATFTFCGPHIIDDFFCDFFPLVKLSCSDTTMVER

VAFASSFLSLSPFLWTLL/YGCILSSILKISSSTGRYRAFSTCSSHLIVV

SVFYGTMVVVYMTPASGTTFNLSKIFPLLYTVVIPLLNPLIYSLRNKGVQ

VALKKGAKLHFSGGN

>LoafORs61.22P

MDDYSLTAITKFILTGLSELLEVHYGLFVVFAAIQDFILVRNGAVLLAIG

AEKKLCTPMDNSVWQICLS*AFSTHKLLFSRSSRTS*MRSNAFLLLGVLC

IFSSWWLWHGLKSFFSSSWLMTNMRPYVSPFCYTLIVKNGSCFHPMAVAW

AADFVNSLLHTVFMFCLSSCKSNQVNQYYCDIFPMVALSCSSTYMAEKFL

LVAGDVLGISAFLITGLSCLHLIHHP*NTVNGRQAKDFSTCASYLLL/LF

CDTMIFTYIHLSSSYNSPAGDRFISMLNG

>LoafORs61.23P

MDIYNQTAITEFILIGLSDLPEVRYPLFVVFAAIYQVTLVGNGAILLAIG

TERKLHTPMYYFLANMYLLDIFCPSTTVPKMLKNLLTENKSISFVGCALE

LYFLGALVGTEVFLLAVMAYDQYVAICFPLRYTVFTTKGCCVQLMVGTWA

AGFLNSLLHTVFTFHLFFCKSKQVNQYYCDIPPLVALSCSSTYVAEMLLF

V*GIVLGVNAFLITGISYIYIICTILKIRSAEGKRRAFSTCASHLLVVCL

LYGTGIFTYIHPSFGHHSPA*DRLISVLYGVITPLLNPIIYSLRNKEIKG

ALKKVLCHKICLQQG

>LoafORs61.24P

VDVYNRTTITEFILIGLSDLPELRYPLFVVFAAISQVTLVGNGAIRLAFG

TEQKPHTPTYYFLANPSLLNIFCPSATISKMLENLLAEKQNISFVECTLE

LYFLVALVGTEVFLLSVMAYDGYVAICFPLCYTLIMAKGRCVQLTAGTWA

VGFLNSILHMVFTFHLSLFKSDRVNQNYCDIPPVVALCHSSAYVAEMLLL

VVGGILGISAFKV/ITGFSYIHYPEDTVS*KGKRKAFFMCALHLLVVCLF

CGTAIFTYIRPSSSHHSPARDRLISMLDGVITPMSSPIIYSLRSTEVKGA

LRKVLCH

>LoafORs61.25P

SVSELISMPWKIRTMSLNFFIVLCLVLLCYSAVSMGNFIILLTITHSCLI

EQPMYYFCHLSLMDLCFTSILVPQL/PPATRD*GAGRKHISSNNCVTQLF

TAHLLMAVGTLKYSSWCIRCHHQARHYMVIMNLHSCRC*S**PGS*VFGT

LLLCYSWYSIYLSVAVTKQITTCVM*NLF*NWSAKIFTLLISQLLPSQG*

WEL*FCCCCCSSGFLHILFNLTVHSSEG*SKALSICSCQIIVMVLFFEPC

VYTFVLPVGSENKDKEMSVFYTVIAPMMNPPFFILRNVEIKIAM

>LoafORs61.26P

IESQRNVSEFILLGLSYDKNIQIFCFVLLFY/FALFYYSISLLVGNLLSL

VSVLRSILFHQVMYYFLSHLASLDICCTSSITPKLIGDLLLGK*SISYGN

CMLQVFIIMHFFGSIEIFVFTAMAFDHYAVICKSLHYMIIRDRKRCNLLG

CLGRWGCPFLSSIIYGNPVTLLWS**NI*LFL*CLPFAKVACTDTHIIGV

LVLVNSGMVVLATFVLLFGSYVINIIYLKKSPS*GKTQSL

>LoafORs61.27P

VQPNNSVTKFILLGLTQDPLRQKMVFMIFLIFCMGTLVGNLLIIVTIKFS

QNLGSATKFLLFYLSIADTCFSISIASRRIVDVLSERK/KKVISYNKCMM

QDFAFHLFGYMEIFVLILMAADYYVAFCKPWHYSTIMRQVCIILIILVWK

GSFKHSIIQMVLVLKLPFCGLNLIGHYCCDLQPLLNIAC/SSFLILMISY

FVILLSLRNHIAEGRKKALSTCTSHVIVLILSFDLCIFIYTSLPITFPMD

KMVAVFYTVGAPFLNPLICMLRSAEVKIVMTELCSSKIT*ERK

>LoafORs61.28P

LLCSILILLYFPLGWKLLILVSILSGILFHQVMYYFLSHF*CTKASLDIC

YTSSITPKLIGDLLLGTKSISYGNCMLQVFIIMHFFGSIEILVLTAMAFD

HYAVICKPLHYMITRNRKRCNLLVLAAWVSGAVHSFPQLFMAIQLPFCCP

NEIDHYFCDIVHLLNL/PFAKFACIDTHITGVLVLVSSSMVALATFMLLF

GSFVIILFTLRNH*AEGRCKALSTCGSHITVVVLFFAPAIFVCLRPPTTS

PKVKVFSLFYTIISPMFNPLIYTLRNTEMKNAMRKVWCQGYFQKKLTIN

>LoafORs61.29P

MENQRKISEFILLGLSYDPYIQLFCFVLFLFCYVSLLVGNLLILISIRCS

SLFYQPVYYFLSHLSSMDICYASSVTPKLIGDLLVETKSISYGNCMLQVF

TMHSFVSIEVFILAAMAFDCYVAICKTLHYMIIMNRTRCNLIVLAV*AGG

ALHSFPQLSVTIRFCFCGANEIDHYFCDIFPLLKVACTDTYITGVLVVAS

SGMVTLVTFVDLFVSYVIILFTLRNHSAEGRHKALSTCGSHITVVVLFFG

PSIFA*LRPPTTFPEDKVLALFYNIIAPVFNSLIYILRNTEMKNAVRKVW

CQGYFQRKRTVNVKKT

>LoafORs61.30P

FLVLYIPVWMGNLLIMISITCSQLSDEPMYFFLSFLSLSKLCYTSTVTPK

LLTDLLAERKTISCNNYMTQLFITHFFGGFEIFILTGMVYDHYMAICKAL

HCTVIMIGQRCNTIITA*CTGGFIHSASLFSLSSYPLVAPVR*ITASVTC

TLCWNWPALMHTP*KAS*KKVIASSDLIALVTFVVFFFFFLILYRLRAHS

AESHSKALSTCSSHITVVVLYFAPAVSIYIRPAISFPEDKVFAVFYIIFA

PVFNP

>LoafORs61.31P

MNHQAKPPEDNLTEIIEFVLLGFADMPHLQWFLFGLSLIIYIIILMTNGT

IFLITKMDSALQSPM*FFLAKFSFLEICYVSTTLPSVLMNLGTQRRTIS*

VACATQMCFVLMFGATECLLLVVMVCAHYVAICSPLHYPLVMNHSVCIQL

VTGSWTIGIPVMIGHTYQIFSLPFCGSNQINCFFYNIFPILKLACGAIFV

NEMLVYTVAVLFAMVSFLLILGSYSEIISIVLKLPSATSRTKAFSTCSSH

LMVVVLFFGSAIIAH*RPNTRHSEGTDKMFSLFYTILTPMFNPMIYSLRN

KDVIMALRKLLCK

>LoafORs61.32P

LLANLEMIILIRMGIQLQTPIYFFLSHISFCGLCYFTTIEP/LAKDKSIS

FYGCALQFFTFCIFADSDCLLLAVITFDQYEAISNPFALYSQHVQ*CMLR

DHGWGLPGGHGRCFDAYHVNLPLMFLWVR*NSSFLL*FTSTFPSFLF*YS

G*RADIIHCFCFIELSAISAVLVSYCCIILSDLKIHSAEGRFKAFSTCTS

HLTAVAIFQGNILSKYFCPSSAYSPDGDSSKS

>LoafORs61.33P

MNKHNLTVLNEFILMGITDRPDLR/P*SEAPLFGFFFIVYMVLVMGNLGL

IILTKIDSRLHTPMYFLLRHL/AFTDLGYSTAVGLQMPINFIVGQNTISY

NSCATQLAFFCIFIVSEIFIHSTMAYDHYVAICNPLLYTVIMSPRVCQVL

AVIPYVYSVFLSLLTIIKIFISSFCGYVIRHFYFDSLPLISLICSNTYDM

KLIILIFSGFNLVLSLLIIFVSYMMILVAILKMNSAEGRLKDFPACGSHL

TVVDLFYGTLFFMYVCHKSCHSLDTKKKSPILH/KKSPLFYTMMIPFLIP

TIYSLRNKQIKSAVHRTWKMCSNILLKINCRV

>LoafORs61.34P

MAKYNLTVLNEFILMGITDCPELQAPLFGILLILYVVSIVGNLGLIILTQ

/SGLHTPMYFFLRRLSFTDLGYATAIGPKMLANFIVDQPTISYNWCAMQL

TFFSMFISEIFILSAMAYDCFVAIYNPLLYTVILSPRVRQVLVVIPSLYS

VFLSLLTIIKIFILSFHSHVISHFYCGSLPLISLICSNTHEIKLIILIFL

AL

>LoafORs64.1P

LDQGNNSRVTEFVLHSLSGPRELQLFYFAFFTLFYSSIVLGNLLIVLTVL

SEPALHTPMYFLLTNLSFIDVCLSTFATPKMIVDFLKEHKTISFEGCMAQ

IFFLHAFAGGETMLLVAMAYDRYVAICRPLHYATIMNVRKCTGLVVGSWL

IGVLHSVSQLVFTVNLPFCGPNQVDSFFCDLPLVIKLACTDTYILEILML

SDSGLMAMSGFVLLLISYTVILVTLRRQSSAGMVKARATLTAHVTVVTLF

FGPTIFIYASPFSNFPVDKVLSIFYIVFTPLLNPLIYTLRNKEVMSAMQK

LRRRQVSS

>LoafORs64.2P

MAHTNESMFSEFLLLGLSDLGNFGFSFLQSL*CMWHLC*ATL*LLLSFPL

TPI*ALPCTSYSVIFLSVISFSLTLSPPRCLQTSLLSIKLIPFEGCMAQI

VLLHISAGSEITLLVAMAYG*FIVISKPLHYIQS*IRDYV*FLYLFSGCG

HSSFYDPIGFYSGSAILWP**GR*LLL*PSLVIELACVDTYEMKIMILTN

SGLISLSCFLALI/SSRSSKVLSTLTAHITVVILFFRACVYFYIWSFSRL

PVNKSLFVFYTVHTPLLNTNTHCLKKENVKSVTRKLRNSHVNSWKN

>LoafORs64.3P

MDQGNYSRVAEFMLLELSSSWELHYFFLLLFNFLYITFELGNLIFPTVIY

EPALYAPI*ITLSNLSVLDVFLAIYATPKMVHDFLHKPKTISSECYMAQI

FLFHVFAVGKMKLLVAMAYDMYVAIY*LLHYATIKNICKCTGLVVRSWVI

RVIHSLSQLAFAVNLPFCDTNIVDSYCDLGVIIKLACTDTCVPEVLMLL/

F*DGGLMVMTSFLPLLISYMIILVTVQR*SSTDMAKACSILMAHITVVTP

FFGPYIFLCAWTFSNFPVDKALSVFSTVFTRILNPIIHTLSTKEVKSAMH

KLKDKYVRS

>LoafORs64.4

MDQGNNSRVAEFVLHSLSGPRELQLFYFAFFTLFYSSIVLGNLLIVLTVL

SEPALHTPMYFLLSNLSFIDVCLSTFATPKMIVDFLKEHKTISFEACMAQ

VFFQHVFAGGEMMLLVAMAYDRYVAICRPLHYAAIMRLRKCTGLVLGSWL

IGVLHSVSQLVFTVNLPFCGPNKVDSFFCDLPLVIKLACTDTYIFEKLMF

LDSGLIAMSSFVLLLISYTVILVTVRRRSSAGMAKARATLTAHVTVVSLF

FGPCLFIYAWPFSNFLVNNILSIFYTVFTPLLNPLIYTLRNKEVISAMQK

LKRLQVSS*

>LoafORs64.5

MDQGNNSRVTEFVLHSLSGPRELQLFYFAFFTLFYSSIVMGNLLIVLTVL

SEPALHTPMYFLLSNLSFIDVCLSTFATPKMIVDFLKEHKTISFEGCMAQ

IFFQHVCAGGEMMLLVAMAYDRYVAICQPLRYAAIMSVRKCTGLVVGSWL

IGVLHSVSQLVFTVNLPFCGPNQVDSFFCDLLLVIKLACTDTYILEKLMF

LDSGLIAFSSFVLLLISYMVILITVRRRSSVGMAKARTTLTAHVTVVTLF

YGPCIFIYACSFNNFLVNNILSIFYTVFTPLLNSLIYTLRNKEVVSAMRK

LWR*

>LoafORs64.6

MDQGNNSRVTEFVLHSLSGPREIQLFYFAFFTLFYSSIVLGNLLIVLTVL

SEPALHTPMYLLLSNLSFTDVCLSTFATPKMTVNFLKEHKTISFEGCMAQ

IFFHHAFAGGEMMLLVALAYDRYVAICRPLHYAAIMSVRKCTGLVMGSWL

IGVLHSVSQLVFIVNLPFCGPNKVDSFFCDLPLVIKLACTDTYIFAKLML

LDSGLIAMSSFVLLLISYTVILVTVRKSSASMAKVWATLTAHVTVVSLFF

GPGIFIYAWPFSSFLVNNILSIFYVVFTPLLNLIIYTFRNKEIISGMQKL

SREQVRS*

>LoafORs64.7

MDQGNNSRVIEFVLHSLSGPRELQLFYFAFFTLSYSFLVLGNLLIVLIVF

SERVLHTPMYFLLSNLSFIDVCLSTFATPKMIVDFLMECKTISFEGCMAQ

IFFHHVFAGGEMMLLVAMAYDRYVAICQPLHYAAIMSIHKCAGLVIGSWL

IGVLHSVSQLVFTVNLPFCGPNHVDSFFCDLLLVIKLACNDTYTFEILML

SDSGLMTLSSFVLLLISYTVILVTVRHRSSAGMAKAWATLTAHVTVMTLF

FGPCIFICVWPFCKFPVDKFLSIFYTVFTPLLNPLIYTLRNKEVISAIQK

LRRQKVSS*

>LoafORs64.8P

MDQGNNSRVTQFVLHSLSGPQELQLFYFAFFTLFCSSIVLGNLLIVLTVL

SEPALHTPMYFLLSNLSFIDVCLSTFATPKMIIDFLKEHKTISFEACMAQ

IFFQHVFAGGEMMLLVAMTYDRYVAICQPLHYAAIVNVHKCTGLVVGSWL

VGVLHSVSQLIFTVNLPFCGPNQVDSFFCDLPLVIKLACTDTYIFERLML

LDSGLIAISSFVLLFISYTVILITLRR*SSIGMAKARATLTAHVTVVTLF

FGPCILIYTWHFSNFLVNNILSIFYTVFTPLLNPLIYTFRNKEVISAMQK

LMRRQVSS

>LoafORs64.9

MDQGNNSRRIEFVLHGLSGPRELQLFYFAFFTFFYSSVVLGNLLIVLTIL

SEPALHTPMYFLLSNLSFIDLCLSTFATPKMIVDFLKENKTISFEGCMAQ

IFFHHAFTGGEMMLLVAMAYDRYVAICRPLHYAAIMNVHKCSGLVMGSWL

FGVLHSLSHLVFTVNLPFCGPNKVDSFFCGLPLVIKLACTDTYTLEVLML

LDSGLMGMIFFLLLIISYTVIVVTVRRRSSAGMAEARATLTAHVTAVTLF

FGPCIFIYAWHFSNFPIDKFLSIFYTVFTPLLNPLIYTFRNKEVISAMQK

LRRRQVSS*

>LoafORs64.10

MDQGNYSRVAEFVLLGLSSSRELQYFFLVFFNFLYIAIVLGNLLIILTVI

SEPTLHTPMYIMLSNLSILDVFLATYATPKMIHDFLHEHKTISFEGCMAQ

IFLLHVFAGGEMMLLVAMAYDRYVAICKPLHYATIMNLCKCTGLVVGSWV

IGVMHSLSQLAFTVNLPFCGPNVVDSYYCDLTVVIKLACTDTYVPEVLML

LDSGLMGLTSFLLLLISYVVILVTVQHQSSTGIAKARSTLTAHITVVTLF

FGPCIFIYAWPFSNFPVDKVLSVFSTVFTPILNPIIYTLRNKEVKSAMHK

LKGRYLRSRLPIQQSLTE*

>LoafORs64.11P

MDQGNNSRVTEFVLHSLSGPQELQLFYFAFFTLFYSFIVLGNLLIVLTVL

SEPALHTPMYFLLSNLSFIDVCLSTFATPKMIVDFLKEHKTIYFEGCIAQ

IFFQHVCAGGEMMLLVAMAYDRYVAIC*PLHYAAIMSVSKCAGLVPGSWV

TGVLHSVSQLVFIVNLPICGPNKVNNFFCDIPFVIKLACTDSYILEKLML

SDSGLMAMSSFVLLLISYTVILVTVRRRSSAGMAKARATLTAHVTVVTLF

FGPYLFIYAWSYTNSAVDKVLSIFCTVLTPILNPLIYTLRNKEIISAMQK

LRRRQVSS

>LoafORs64.12

MRPGSMDKVNSTVVSEFVLLGLSSSQELQLFFCIFFSALYVVIVLGNLLI

ILTVTSDASLHSLMYFLLGNLSFVDICQASFATPKMIADFLSEHKTISFR

GCIAQIFFIHLFTGGEMVILVSMAYDRYVAICKPLYYVVIMSRQTCTVLV

MLSWAVGLVHTLSQLSFTVNLPFCGPNVVDSFFCDLPRVTRLACLDSYII

EILIVANSGTLSLSAFSLLISSYIIILITVWFKSSAAMAKAFSTLAAHIM

VVILFFGPCIFIYVWPFTTYSVDKVLAIFYTIFTPILNPVIYTLRNRDMK

VAMRKIVTHYLKPKKISEMPLIVRNSLI*

>LoafORs64.13

MAHTNESVVSEFVLLGLSGSWELQLFFFAIFSIVYVASVLGNIMIIVIIS

SDSHLNSPMYFLLSNLSFIDICQSNFATPKMLADFLAEHKTISFEGCMAQ

IFLLHSFVGSEMMLLVAMAYDRFIAICKPLHYATIMNRRLCIIFVSISWA

VGILHSVSHLAFTVDLPFCGPNEVDSFFCDLPLVIELACMDTYKMEIMTL

TNSGLISLSCFLALIISYTIILITVQCRSSSGSSKALSTLTAHITVVILF

FGPCIYFYIWPFSRLSVDKFLSVFYTVCTPLLNPIIYSLRNEEVKSAMRK

LRNRHVNSWKN*

>LoafORs64.14P

FFSLLGNFSSPDSIDGWSNKSVVTEFILLGLSSSQELQIFLFFVFSVFYG

AAVLGNILIILTVITDSHLHSPMDFLLSNLSFIDVSQATFATPKMIADFL

NEHKTITFQGCTSQIFFLHVFGGSEMVLLVAMAYDRYIAICKPLHYMTIM

SRKVCTVLVGVSWAIGILHSVSHLAFTVNPPFCGPNKVDNFFCDLPLVIK

LACLDTYVLEILVLTNSGLLSLICFLLLLISYTIILATVHRQASGGTSKA

LSTLSAHITVVVLFFGPLIFIYIWPFESFPIDKFISVFFTVFTPLLNPII

YTLRNKDVKEAIRKLRNR

>LoafORs64.15

MKDLSLSISNYFFFHHLGNISSLDSTDGWSNKSVVTKFVLLGLSSSQELQ

VLLFFVFSVFYGAAVLGNILIILTVITDSHLHSPMYFLLSNLSFIEVCQA

TFATPKMIADFLNEHKTITFQGCMSQIFFLHVFGGSEMVLLVAMAYDRYI

AICKPLHYMTIMSRKVCTVLVGVSWAIGILHSASHLACTVNLPFCGPNKV

DNFFCDLPLVIKLACLDTYILEILVLTNSGLLSLICFLLLLISYTIILAT

VHRQASGGTSKALSTLSAHITVVVLFFGPLIFIYIWPFESFPIDKFISVF

FTVFTPLLNPIIYTLRNKDVKKAMRKLRNRHMGSKWVF*

>LoafORs64.16

MRLIILLLGLSTSQELQPFLFVLFSVLYLAILLGNFLIILTVTSDARLHT

PMYFLLANLSFIDVCVASFATPKMIADLLVGRKTISFQACMAQIFFVHLF

AGGEMVLLVSMAYDRYVAICKPLHYMTIMSRHVCIILVLIPWCVGFIHTV

SQLAFTVNLPFCGPNEVDSFFCDLPLVTKLACIDIYVVSLLIVADSGFLS

MSSFLLLVVSYTVILITVRNRSSASMAKACSTLTAHVTVVTLFFGSCIFT

YVWPFSGYSVDKVLAVFYTIITPILNPVIYTLRNKEMKAAMSKLKNRYL*

>LoafORs64.17P

NCSSSVSKFILLGFPCTWEIQILLFSFFSGTYSLTLNGNLSIICIVRWDH

QQQTPMYILLANFSFLEICFITSTTPNMLANFVSATNAISFSGCFLQFYF

FFSMGTTETFFLSVMALDRYLAICRPLH*PSIMTVRRCIRMGACCWACGF

LYFLLPVYLISQLPFCCPNKIDHFLCDPGPLMKLSCVPSPATEVICAMFN

PVLMFSTFLFIISSNALVIRAVLRVPSAEGRHKAFSTCSSHLAVVSLFYG

SIMIVYVSPTTGNPAGIQKIVTLFYSVLTPLFNPLIYSLRNKEMKEALRK

LFRAVRFNQR

>LoafORs64.18

MDENQTEFVREFVLAGFSQTPAIEAGLFVLFLFFYVSTWVGNVLIMLTVA

SDNCLNSSPMYFLLGNLSFLDLCYSTVTTPKLLADFLENEKLITYDQCIV

QLFFLHFVGAAEMFLLTVMAYDRYVAICRPLHYTTVMSRRLCCFLVAASW

TGGFVHSIVQAILTNHLPFCGPNQVDNFFCDVPPVIKLACADTFVIELLM

VSNSGLISTSSFVVLISSYTTILVKIRSKEGRQKALSTCASHLMVVTLFF

GPCIFIYARPFSTFSVDKLVSVLYNVVTPMLNPLIYTLRNKNVKSAMWKL

WDRSGLTTKKQET*

>LoafORs64.19

MDLQNYSLVSEFVLHGLCTSRQLQFFFFIFFSGLYVAIVLGNLFIVATVI

SNPHLHSSPMYFLLGNLSFLDMWLASFATPKMIRDFLSHRKLISFGGCMA

QIFFLHFIGGAEMVLLVSMAYDRYVAICKPLHYMTLMSRQTCIGLVLVSW

AVGFVHSISQVAFTVNLPYCGPNVVDSFFCDLPLVIKLACMDSYVLGVLM

ISDSGLLSMSCFLLLMISYTIILITVRQRAAGGVSKALSTCSAHIMVVTL

FFGPCIFIYLWPFSSFSVDKLLSVFYTIFTPLLNPLIYTLRNEEMKTAMK

KLRNRHVTFH*

>LoafORs64.20P

MERTNYLVVSEFILVGLPKSQILWILFFWGFFEFSLGTVLGNHLIFVTVT

FDSHFHTPIYFLLINLSCINMILASCASSKVIVDLF*KWKIISWWGCYPQ

MFLMCLIVG/SGSEMMLLVAMATDSCVAICKPLHYMTIMSLQVFIGQLLS

SYAVGFV/VIFLCCWICDSSSQMAFMLNLSNVVDSFFCDRSLVIKLANRD

TYIPKLLVIAD

>LoafORs64.21P

MSTDKQMERQNRSMVSEFILLGLTESYELQIFFFLFFVIIYVAIVLGNLT

IIFVVKLDPQLHSPMYFLLANLSFIDMFLASFATPKMIFDSLSECKSISY

EGCMSQMFFGHF*VEVR*CCL*PWQLIDTLPFANPSVTKLS*VIVLASGL

HFSPGPPVLCTP*AK*FSQ*PCLSVAPMS*TVSFVIFLGSSNLPALILTS

WSCWSLQTVEYSLFCFNFLLISYSIILFNVQHRSSSGSSKALSTLPAHIT

VVVLFFGPCVFIYVWPFSSISIDKILSVFYTIFTPL

>LoafORs64.22P

MDLKNESVVVEFILRGFSGPWKLQIFFLVIFSLIYGATVMGNILIMVTVT

FSSTLRSPMYFLLGNLSFLDMCLSTVTTPKMITDLLTAHKTISLWGCMAQ

MFFMHFFGDAEMTLLIAMAFDRYVAICKTLHYSAIMSPRLLSGFVILSWT

IGFIHIP*AK*Y*Q*TCLSVATVS*TTFFVTFPL*SSLLVLKHIPWNYLS

LLIVDCSHLSVSSSFLSPTLSFWSRYDESHLEGLPRLCLHCLLT*LWSLC

SLDLVSLSMPDHSIVLQEIKSLLYFTVITPLLNPLIYTLRNQKMQEAMKK

LRSQHVSST

>LoafORs64.23

MERENSTVVTEFILLGLTQSQDAQLLVFVLVLIFYLIILPGNFLIILAIK

SDPSLTAPLYFFLSNLAFLDASYSFIVAPRMLADFLAMKKVISYKGCITQ

LFFLHFLGAGEMFLLVVMAFDRYVAVCRPLHYSTVMKPRICYALLLALWL

GGFAHSIVQVALILHLPFCGPNQLDNFFCDVPQVTKLACTDTFVVELLMV

SNSGLLTLLCFLGLLASYAVILCHVKGHSSEGKNKAVSTCTTHIVIVFLM

FGPAIFIYTRPFRVFPADKVVSFFHTVIFPLMNPVIYTLRNQEVKTSLRR

LLSRHIVC*

>LoafORs64.24

MDINNSSMISEFVLLGLTATWELEIFFFLIFLLSYAAIMAGNLLILVTVT

FDFHLRSTPMYFLLGNLSFLDMTVSTITTPKMVTNFLREKKTISLWGCMA

QMFFLHLLGGSEVTLLIVMAVDRYIAICKPLHYTTIMNRRVLLGSVLVSW

GVGFVHTMSQMVFTITLPFCGPNVVDDIFCDLPLVLKLACTDTYVLELLV

IADSGLLSFICFVLLLISYTVILVTVQRRSSGGLSKALPTLSAHITVVTL

FFGPSICIYSWPFSSLSVNKFLSVFYSVITPLLNPIIYTLRNQEMKAAMT

RLRTQHVSSRWNF*

>LoafORs64.25P

MYEPYYSEVSEFDFLGLSNPRSMQHFLLTFSTVFYVTIVLGNLLVVITVT

FDSHLHFLMYFLLANLSFIYLCLSTLKFRFLRRSLACALGKIT*HSMGVS

SRFLYFMGVSSRFLYFMTLMDLRWCCS*PWTRTIWHHMYSPLISIMTP*M

CIWLLVSACVIGLIHLV

>LoafORs64.26P

MDINNSSMISEFVLLGLTSTWELEIFFFLIFLLSYAAIMAGNLLIVVTVT

FDFHLRSTPMYFLLGNLSFLDMTMSTITAPKTVTDFLKEKKAISLWGCMA

QMFFLHLLGGSKMTLLVVMAVDRYIAICKPLHYTTIMNRWVLVGCVLLSW

GVGFVHTMSQMVFTITLTFCGPSVVDNIFCDLPLVLKLACTDTYILELLV

IADSGLLSLICFLLLLISYTVILVTV*RRSSGGLSKALSTLSAHITVVTL

FFGPCIFIYAWPFSSLSVDKFLSVFYSVITPLLNPIIYTLRNQEMKAAMT

RLRTQHVTY*WNF

>LoafORs64.27P

MYEANYSEVSEFDFLGLSNPRSMQHFLLTFSTVFYVTIVPGKLLVVIIET

FDSDLDFSMYFLLASLSFIDLCPCTLIV

>LoafORs64.28P

NSSVTSEFVLLGLISNWELEIFFF/FFSIFLLSYAAIMSGNLLIVVTITF

DFHLNSTPKYFLLGNLSFLDMTISTIRTPKMVTDFLREKKTISLWSCMAQ

MFFLHFLGSSEMPLLIAMAVDRYIAICKTFHYTTIMNRRVLMGSVLLSWG

VGFVHTMSQMVFTLPFSGPSVVYNIFCDLALVLKLACTETYVLELLVIAD

SGLLSFTCFVLLLISYTVILLTVQHQSSGGLSKALSTLPAYITVVTVLW/

ISLWSLFFGPCIFLYIWPFSSFSVDKFLPVFY

>LoafORs64.29

MMDSMEQFNQSQVSEFILLGLISSQNTQFLLFALFSVTYVITVLGNLLIV

VTVFYTPYLNTPMYFLLGNLSFVDMTLASFATPKMILNLVKKHKTISFAG

CFTQIFLLHFLGGVEMVLLVSMSYDRYVAICKPLHYTAIMNKRVCILLVV

TSWFSGLLHSGLQIPFVVNLPFCGPNVVDSIFCDLPLVTKLACIDTYVVQ

IVIVANSGMISLSCFFILLISYSLILITIRSHSSVGQSKARSTLTAHITV

VILFFGPCIFIYIWPFSNHSVDKFLAVFYTIVTPILNPIIYTLRNKEMKA

AMKKLWGSFVSSRQDT*

>LoafORs64.30

MHFIEQFNQSQVSELILLELVSSQEIQFLLFALFSVTYVITILGNLLIVV

TVFYTPNLNSPMYFLLRNLSFVDMTLASFATPKIILNLVRKHKTISFAGC

FTQIFLLHFLGGVEMVLLVSMSYDRYVAICKPLHYTTIMNKRVCVLLVVT

SWFSGLLHSGLQVPLVNLPFCGPNVVDSIFCDLPLVTKLACIDTYVVQIV

IVANSGMISLSCFFILLISYSLILITIRSHSSVGQSKARSTLTAHITMVI

LFFGPCIFIYTWPFSNHSVDKFLAVFYTIVTPILNPIIYALRNKEMKAAM

KKLWSSFVSSRQDT*

>LoafORs64.31

MYEANYSEVSEFVFLGLSTSRPMQHFLLAFSTVFYVTIVLGNLLVVFTVT

FDSHLHSPMYFLLANLSFIDLCLSTLTVPKMISDLYSGQNTISFQGCVIQ

IFVLHVLGGSEMVLLIAMALDRYVAICKPLHYLTIMSPWMCIWLLVSAWV

IGLIHSVAQLAFVVHLHFCGPNLIDSFYCDLPQFIKLACTDTYRLEFVIT

ANSGFISMGTVFLLTSSYIFILVTVWKHSSGGLSKTFSTLSAHITVVVLF

FGPYIFVYVWPFPTVPVDKFLAILDFMITPILNPAIYTLRNKDIKMGMRR

LNSQLLSLRKIS*

>LoafORs64.32P

MSITNYSVVSEFVFLGLSNSRSMQHFILSCSTISYISIVLGNLLVA*TVT

FDSHLHSPMYFLLANLSIMDLCFSTVTVPKMLSDLYSGQNTISFQGCVIQ

IFILHVLGASEMMLLIAMALDRYVAICKPLNYLNIMSPWMCIWLVFSAWG

IGIIHSGFQLACVAHLHFCGPNEIDSFYCDLPWFIKLACADTYKLEFIVT

ANSGIVSMGTFFLLVFSYMFILVTEWKRSSSGLSKAFSTLSAHITVVVLF

FGPCIVVYMWPCPTVPVDKFLAV*DFLITPLLNPAIYTLRNKDMKMAMRK

LSSQFLSLKKI

>LoafORs64.33

MEEVNQSAVSEFIILGLCDPRELQVFLPVIFSSLYLITVLCNIFVVLLII

ADLHLHSPMYFLLANLSFIDFCLSSVTTPKLITDFLKEKKTISFGGCMCQ

IFFGHLFGGSEMVLLVSMAYNRYVAICKPLHYSSIMNRQMYIGLMMTSWI

IGFVHSISQLAMIVKLPFCGPRELDSFFCDIPLVIKLACMDTHILEVLIN

ADNGILTTICFILLLISYSYILFTVCHFSKDGASKALSTCTAHITVVVLF

FGPCIFIYLWPFSITWADKFLAVLYVIIIPLLNPVIYTIRNKEIKNAMKR

LRH*

>LoafORs64.34

MSVYEANHTEVSEFVFLGLSTSRPMQHFLLAFSTVFYVTIVLGNLLVVFT

VTFDSQLHSPMYFLLANLSFIGLCLSTLLVPKMICDLYSGQNTISFQGCV

IQIFVLHVLSGSEMVLLIAMALDRYVDICKPLHYLTIMSPHMCIWLLVGS

WVIGLIHSVVQLAFIVSLDFCGPNEIDSFYCDLPLFIKLACTNTYKLEFM

VTANSGLISMGTFLLVFSYIFILVTVWKHSSGGLSKAFSTLSAHITVVVL

FFGPCIFIYVWPFSMVPVDKFLAILDSLITPILNPAMYTLRNKDMKMAMR

RLSSRFLSLRKIF*

>LoafORs64.35P

EKVNQSVASEFIFGGLCNSSELQNFLLLLFCTLYLMTVVSNLLDVLLITS

DPHLHSSMYFLLANLSFADFFLFSVITLKLTTDVLR/KDSKTISFGDCMS

QILCVLFFAAGEMVLLVTIAYDCHMAICKPLHYSSIIDR*KYHWLVLITR

IIGFVHSIS*MAMILELPFCGPRVVDSFFCDILFVIKLACMDTHTLETLI

NVLATTCFILLLISYIYIILT

>LoafORs64.36

MYEANYSEVSEFVFLGLSTSRPVQHVLLTFSTVFYVTIVLGNLLVVFTVT

FDSHLHSPMYFLLANLSFMDLCFSTLTVPKMISDLYSGQNTISFQGCVIQ

IFVLHVLGGSEMVLLIAMALDRYVAICKPLHYLTIVSPCMCIWLLVGAWL

IGLIHAVTQVAFIVHLHFCGPSEIDSFYCDLPWFIKLACTDTYKLEFMVT

ANSGFISMGTFFLLIFSYIFILVTVWKHSSGGLSKALSTLSAHVTVVVLF

FGPCIFVYVWPFPTVPVDKFLALLDFMITPILNPAIYTLRNKDMKMAMRR

LSSQLLSLRKIS*

>LoafORs64.37P

MNKTNYSAVSEFVFLGLSTSRPMQHFLLSCSTIFYILIILGNVLVVFTVI

FDLHLHSPMYILLANLSFIDLCLSTLTVPKMIYDLYSGQNSISFQGCVIQ

IFILHVLGGSEMVLLIAMAFDRYEAICKPLHYLTIRSPQVCIWLLVGAWI

IGVIHSVAQLAFVVHLHFC/FCCPFAFL*IDSLYCDLPQFIKLACTDTHT

LEFIVTANSGFISMGTFFLLIFSCIFILVTVWKHSSGGLSKALFTLSAHI

TVVVLFFGPCIFGYV*PYLTMPVDKFLPIFDFMITPILNPAICTLRNKDM

KVAMRRLSSQLQKSSQLPNVNTSYF

>LoafORs64.38

MEEANQSVVSEFIFSGLCNSRELQSFFLLPFSTLYLMTVVGNLLVVFLII

SDSHLHSPMYFLLANLSFVDFCLSSVTTPKLTTDFLKDNKTISFGGCMSQ

ILCVHFFVGGEMVLLVTMAYDRYVAICKPLHYSSIMDRQKCLWLVLISWI

IGFVHAMSQMAMILELPFCGPRVVDSFFCDIPLVIKLACMDTHTLGTLIN

TDSGVLATTCFILLLISYTYILLTVHLHTKDGASKALSTCTSHIIVVVLF

FGPCIFIYLCPFSIAWVDKFLGVFYTAITPLLNPAIYTLRNKEIKNAIKR

LRSHHMDSRDNF*

>LoafORs64.39P

MYKANFSEVPEFVFLGPSSSRPMQHFLLTFSAVFYVTIVLGNLVVFIVTF

DSHLHSPMYFLLASLSFIDSGLSTLMVPKMISDLYSGQNSISFQGCVI*I

FVVYVMGRSEMVLLIAMALD*YVVICKPLHYLTIISPQMYIWLLVGAWVI

CLIHSVAQIAFVVHVLFCGPKDIFYCDPPQFITLACTDTYKLEFMNTAYK

GFISMGTFFLLIFSCIFMLVIMETLFRWLVQGSVYFVSLHHCGGFVFWTV

HLCLCGPFPTVQVDKFLAILDFMIIHILNPAIYTLKNKNMKVTMKRLSSQ

LLSLRNVA

>LoafORs64.40

MDIKNTSTITEFVLLGLTSTWELEIFFFLIFLLSYAAIMAGNLLIVVTVT

FDFHLNSTPMYFLLGNLSFLDMTISTITTPKMITDFLREKKTISLWGCMV

QMFFLHFLGGSEMTLLVVMAVDRYIAICKPLHYTTIMNHRVLVGSVLLSW

SVGFVHTMSQMVFTITLSFCGPNVVDNIFCDLPLVVKLVCTDTYFLELLV

IADSGLLSLICFVLLLISYTVILVTVRHRSSGGLSKALSTLSAHITVVTL

FFGPCIFIYAWPFSSLSVDKFLSVFYSVITPLLNPIIYTLRNQEMKAAMS

RLRTQHVSSRQNL*

>LoafORs64.41

MDIRNSSMISEFVLLGLTSIWEIEILFFFIFLLSYAAIVAGNLLIVVPVI

FDFHLHSTPMYFLLGNLSFLDMTFSTISTPKMVTDFLREKKTISWWGCMV

QMFLLHFLGGSEMTLLIVMAVDRYIAICKPLHYTTIMNRQVLVGSVLLSW

GVGFVHTMSQMVFTITLSFCGPNVVDNIFCDLPLVLKLACTETYVLELLV

IADSGLLSFICFVLLIISYTVILVTVRHRSPGGLSKALSTLSAHITVITL

FFGPCIFIYAWPFSSLSVDKFLSVFYSVITPLLNPIIYTLRNQEMKVAIG

RLRTQHVSSK*

>LoafORs64.42

MCEANYSEVSEFVFLGLSTFRPMQHFLLTFSTVFYITIVLGNLLVVYTVT

FDPRLHSPMYFLLANLSFIDLCLSTLTVPKMISDLYSGQNTISFQGCVIQ

IFVLHVLGGSEMMLLTAMALDHYVAICKPLHYLTVMSPRMCIWLLVGAWL

IGLTHSVTQLAFVVHLHFCVLNKIDSFYCDLPQFIKLACTDTYKLKFMVT

ANSGFISMGTFFLLIFSYIFILATVWKQSSGGLSKAFSTLSAHITVVILF

FGPCIFVYVWPFPTVTVDKFLAILDFMITPILNPVIYTLRNKDMKMAMRR

LNSQLLSWRKIS*

>LoafORs64.43P

MEAVNQSTGSEFIILGLCDSRELQAFLLLIFSSLYLITILGNIFIVLLII

ADLHLHSPMYFLLANLSFIDFCISSVTTPKLITDFLKEKKTISFGGCMCQ

IFFGHFFGGGEMVLLVSMAYDRYVAICKPLHYSSIMNRQMCIGLVMTSWI

IGFVHSISQLAMIVKLPFCGPWELDSFFCDIPLVMKLACVDTYTLEMLIN

ADSGVLATMSFILLLISYSYILFTVCLFSKDGASKALSTCTAHITAVVLF

FGPCIFVYL*PLSITWVDKFLAVFYAVITPLLNPAIYTLRNKEIKNAMKR

LQY

>LoafORs64.44

MNITNYSVVSEFVFLGLSTSRPMQHFLLSCSTILYISIVLGNLLVVFIVI

FDLHLHSPMYLLLANLSFIDLCLSTLTVPKMISDLYSGQNTISFQGCVFQ

IFMLHVLGGSEMVLLTAMAFDRYVAICKPLHYLTIMSPWMCIWLLVGAWI

IGVIHSVVQLAFVVHLHFCGPNEIDSFYCDLPWFIKLSCTDTFKMEFVVT

ANSGFISMGTFFLLIFSYIFILVTVWKHSSNDLSKALSTLSAHVTVVVLF

FGPSIFIYVWPFPTVPVDKFLAVSDFLVTPILNPAIYTLRNKDMKMAMRR

LSSQLLSLRSI*

>LoafORs64.45

MGELNDSVISEFVLLGLSSSWETKVFLALTFSLLYLGIILGNLFILFLVI

LDSHLHSPVYFLLANLSLIDVGLSSTTVPKMITDLLNEYKAISFQGCMTQ

ICFIHILGGVEMVLLIAMAFDRYTAICKPLHYLNIMNPKIRVSFVVTAWV

TGVVHTMSQFSFVVNLPFCGPNKIDSFFCDFPRIIKLACTDGYKFEFIIA

ANSGFMSMGTFFLLILSYAFILVSVWKRSSGNLLKAFVTLSAHITVVVLF

FTSCVFLYVWPFPTSSLDKYLFIVDFAITPILNPAIYTLRNKDMKTAIKR

LHKQQYYMRFC*

>LoafORs64.46

MEEANQSVVSEFVFSGLCNSRECQAFLLLPFSMLYLMTVVGNLLVLLIIS

DPHLHSPMYFLLANLYFVDFCLSSVTTPKLTTDFLRDNKTISFRGCMSQI

LCVHFFGGGEMVLLVTMAYDPYVAICKPLHYSSIMDRQKCLWLVLISWII

GFVHAMSQMAMILELPFCGPRVVDSFFCDIPLVIKLACMDTHTLGTLINT

DSGVLATTCFILLLISYTYILLTVRLRTKDGPSKALSTRVSHIIVVVLFF

GPCIFIYLWPPSTTWVDKFLAVFYTVITPLLNPAIYTLRNKEIKNAIKRL

ISHHMNSRDNF*

>LoafORs64.47

MGELNDSMISEFVLLGLSTSWKTKVFLTVTFSLLYLGIILGNLFILFLVI

LDAHLHSPMYFLLANLSVIDLGVASTTVPKMITDLLNEYKAISFQGCMTQ

ICFIHILGGVEMVLLIAMAFDRYTAICKPLHYLNIMNPKIWVSFVVTGWV

TGVIHAMSQFSFVVNLPFCGPNKIDSFFCDFPRIIKLACTDGYKFEFIIA

ANSGFMSMGTFFLLILSYAFILVTVWKSSSGNLLKAFITLSAHITVVVLF

FTPCVFLYVWPFPTSSLDKYLFIVDFAITPILNPAIYTLRNKDMKIAIKR

LNKRQCYFRFC*

>LoafORs64.48P

MEEANQSVVFLFLFSGHCNSRKLQSFLLLPFSILHLL/SDPQLHSPMYFL

LANLSFIDSCLSPDPKLITDFRNHNKTTSFRGCMSQTLCVHLFAGVEMVL

LVTVVYDP*VAICKPLHYASIMDRQ/WLQLLKS*IIDFQHAISQMAMILE

LPFCGPRVVDSFFCDIPLVTKLACMNTH/HTPGILINPDSGVLAKTCFIL

LLMYCILLTVCLCTKDGASKVLSICTSHIIVVVVFFGPCIFISLWPFSIT

SLVKFLAVFYTVIKPLLSPAI/TLRNKDNKNSIKRLIS*HMDLRDNF

>LoafORs64.49P

MGRLNDSVISEFVLLGLSSSWETKVFLTLIFSLLYLGIILGNFFILFLVI

LDSHLHSPIVLPAGQPVPH*YGTFLYHSPQDDHRPFNEHKVISFQGCMTQ

TCFIHILGGTEMLLLIAMAFDRYTAICKPLHYLTIMSPNVCVSIVVIGWV

TGVIHAMSQFSFVINLPFCGPSKIDSFYCDFPRIIKLACTDGYKFEFVNI

ANSGFLSVGTFFLLILSYAFILVSVCKRSSDDLSKAFVTLSAHITVVVLF

FTPCIFLYVWPFPTSSLDKYLFIVDFAITPILNPAIYTLRNEDMKIAIKR

LHKQRYYLRFC

>LoafORs64.50P

MDRVNGSAVTEFVLLGHAQSLGMQFFLFFVFFLFYVGIILGNLFIVFTVI

FNLHLHSPMYILLANLSLIDLGLSSTTVPRTISDLFSDCKVISFHSCMIQ

MFFIHVTGGVEMVLLIAMAYDRYTAICKPLHYLIIMNPKMCVFLVVAAWV

VGVIHAVSQFVFVINLPFCGPNNVGSFYCDFP*VIKLACMDTYQLEFVVT

ANSGFTSMATFFFLAASYIFILLTVRKHSSNDFSKALFTLSAHITVVVLF

FAPCMFLYVWPFPTKSLDNFFAIVGFVVTPVLNPAIYTLRNKDMKVAMRK

QSQQ

>LoafORs64.51

MVTEFIFLGLSNSQELQISLFVFFFVFYVGIVLGNLVIVITVAFDSHLHS

PVYFLLANLSLIDLCLSSVTAPKMTADFFSKRKVISFKGCLGQIFFLHFF

GGGELVILIAMAFDRYVAICKPLHYTTIMCGNVCVGIVAAAWGIGFLHSV

SQLAFAVNLPFCGPNEMDSFYCDLPRVIKLACTDTYRLDIMVIANSGVLT

VCSFVLLIISYTIILVTIQHHPSDRSSKALSTLTAHITVVLLFFGPCIFI

YAWPFPIEALDKFLAVFYSVVTPLLNPIIYTLRNKDMRAAMRRLRKRTMN

CRIKS*

>LoafORs64.52

MDGGNTSAVSEFVFLGLTSLWKMQLLLLVFSSVLYVASMTGNILIVFSVT

TDPHLHSPMYFLLASLSFIDLGACSVTSPKMIYDLFRKHKVISFGGCITQ

IFFIHVIGGVEMVLLIAMAFDRYVAICKPLHYQTIMSPKLCILFLAASWA

LGVSHSLFQLAFIVNLPFCGPNVLDSFYCDLPRLLRLACRDTYRLQFMVT

VNSGFICVGSFFILVISYIFILFTVWKHSSAGSSKALTTLSAHITVVLLF

FGPTMFVYTWPHPNSQMDKFLAIFDAVLTPFLNPVIYTFRNKDMKAVMKR

VCKQLVIYRKIS*

>LoafORs64.53P

LGTCSTTSPKMIYDLFRKCKVISFGGCITQVFFIHVIGGVEMVLLIAMAF

DRYVAICKPLHHLTITSPWICILFLAAAWALGITH/YSLFQLAFIINLPF

CDPNVLDSFYCNLPRLLRLACRDTYGLQFMVTVNSGFLCVGSLLILVTSY

IFILFTVWKHSSGGLSKALSTLSVHITVVFFFFGPTMFVYTWPHLNSQMD

EYLALSDAVITPFLNPVIYTFRNKEMKTAMKRVFRPLVIFRKIS

>LoafORs64.54

MDGANHSVVSEFVFLGLSNSWEIQLVLFVFSSMFYVASMLGNSLIVLTVT

SDPHLHSPMYFLLANLSFIDLGISSVITPKMIYDLFRKHKVISFGGCIAQ

IFFIHLIGGVEMLLLTAMAFDRYVAICKPLHYFSIMNPKLCILLQVAAWI

IGLIHSVFQLVFVIKLPFCGPNVLDSFYCDLPRFIKLACIDSYRLEFMVT

ANSGFISLGSFFILIISYIFILITAQKHSSGGSFKALSTLSTHIMVVILF

FGPCIFVYTWPHPKSHLDKFLAILDGVLTPFLNPVIYTLRNKEMKMAMRR

VCSHLLVYRRIS*

>LoafORs64.55P

MDGGNHCVVSEFVFLGLTNSRDIQLFLLVFSSVLFVASMTGNILILFSVT

TDPHLHSPMYFLLGSLSFIDLGACYTISPKMIYDLFRKQKVISFGGCITQ

IFFIHIVGGVEMVLLIAMAFDRYVAICKPLHYLAMMSPHMCILLLATAWA

LGIIHSLFQLAFIINLPFCGPNVLDSFYCDLPRLLRLACRDTYGLQFLVT

VNSGFICVGSLLILLISYIFILFTVWKHSSAGSSKALSTLSAHITVVFLF

F/PTIFVYTWPHPNSQMDKYLALSDAALTPFLNPVIYTFRNKEMKTAMKR

VFRPLVIFRRIS

>LoafORs64.56P

MNRANHSVVSEFVFLGLSSSWEIQLVLFVFFSMFYVASMMGNSLIMLTVT

SDPHLHSPMYFLLTNLSFIDLGVSSVISPKMIYNLFRKCKVISFGGCIAQ

IFFIHVIFGVEMVLLIAMAFDRYVAICKPLYYVTIMNPRMCIFFLVAAWM

IGLIHSVVQLAFVVNLPSVAPMCWTAFTVTFLDSSNWPAQTPTNWSSWSW

PTVDSSLWAPSSY*WFPISSVIIVTVQKHSSAGLSKALSTLSAHSSFVFC

SF/IVVLFFAPLIFFYTWPSPSVHLDKFLAIFDVVLTPFLNPIIYTFRNQ

EMQVAIRRVCSQLVSYRKIS

>LoafORs64.57

MDGANHSVVSEFVFLGLSNSWEIQLVLFVFSSMFYVASMMGNSLIVLTVT

SDPHLHSPMYFLLANLSFIDLGVSSVTSPKMIYDVFRKRKVISFGGCIVQ

IFFIHVIGGVEMVLLIAMAFDRYVAICKPLHYLTIMSPRMCISFLVSAWV

VGLIHSVVQLAFVVNLPFCGPNVLDSFYCDLPRFIKLACTDTYWLEFMVT

ANSGFISAGFFFILIISYIVIMVSVQKHSSAGLSKALSTLSAHITVVVLF

FGPWIFFCTWPSPSIHLDKFLGIFDAVLTPFLNPIIYTFRNQEMKVAMRR

VCNQLISYRKIS*

>LoafORs64.58P

MKTTDHSVVSKFVLLGLSNSWEIQLLLFAFLLFAMCPV*WETTS*WSL*P

LILIYHPPLYFLLANLSVIDLIFCSIAAPKMICDHF*KRKVTSFGGCTTG

RLLPCC*GLRDSTARTHRL*QILGICKALHYLTIMSPGMCLFIFFLVTFW

VFGFIHS/VVQLVFVVGLPFFGFNVLDSFLCDPSWHLRLPCTHTQELEFM

VTVNSRLILWAPLSYWLFPTSLFCSLFGNFLQVVHPRPFPLYQLVSLLQS

YSLGHWCFSTSGLL*HHTWISILLFLMQFSLLF*IQPSTLRNKEMKVAMK

RLCGCLVHYRKLS

>LoafORs64.59

MGRTNHSVVTEFVFLGLSNTWEIQLVLFVFFSMFYLASLLGNSLIMITVN

SDPHLHSPIYFLLANLSFIDLGVSSVTSPKMIYDLFRKHKVISFGGCIAQ

IFFIHVIFGAKLVLLIAMAIDRYVAICKPLHYLTIMNPQMCIFFLVAAWM

IGLIHSVVQLAFVVNLPFCGPNVLDSFYCDLPRFIKLACTDTYRLEFMAM

ANSGFISVGSFFILIISYIVILLTVQKHFSAGLSKALSTLSAHITVVVLF

FVPLISFYTWPSPSTYLDKFLAIFDAFLTPFLNPIIYTFRNQEMKVAMRR

VCRQLVNYGKIS*

>LoafORs64.60P

VVLELSNSWQI*LFLFCFCSVFYISSMMRNLIVLTVTLDPYLPSPMCFLL

SNIPITGLTFCLIAAPKMICDLLQKRKVICFGGCIAHIFFSHAVESTEVL

PIPMVFDRY/LVICKPFYYLIIMSLRTCLFFSVTSWIIGLIHSVVQLVFV

VDLPLFLPFCGSNVLDSFYYDLLPLFRLVCTDNQELEFMVTVKFGG*VNS

*LISVGSFVLWIFSYLFILFSGWKHSSGGSSEAISTLSAHITVLVFFFGP

LLVYYTLPSPTSHLDKYLTIFDAVLTAFLNSVIYTLRNKEMNMSVKRLCS

*IVCYRMIS

>LoafORs64.61P

MDGANYSVVSEFVFLGLSNSWEIQLVLFVFFSMFYVASMLGNSLIMFTVT

FDPHLHSPMYFLLANLSFIDMGVSSAASPKMIYDLFRKHKVISFGGCIAQ

IFFLHVIFGVELVLLIAMGFDRYVAICKPLHYLTIMSPRMCIFFLVAAWV

IGLIHSVVQLAFLVNLPFCGPNVLDSFYCDLPGLIKLACTDTYQLEFMVM

ANSGLITVGSFFILYL

>LoafORs64.62P

FRSIAAPKMICDLFQKRKVTSFGGCIAHIFFSHAVGGTEVLLIPMAFDRY

WPFVSHSIT*PS*AHGCINFFQSLPLSLALSSQWSN*FFVVDFPFYGSNA

LGNFYCDLPCLLRLVCSDTQVIDFIVTVNKKLTVTVNSGLISIVFFVL*V

ILYIFILFSGWKHSSGGSSEAIATLSAHIAVVVLFFGPLLVFYT/WPSLT

SHLNRYLTIFDAVLTPFLNSVIYTFRNKDMNVSMKRVCSCLVGYRTIS

>LoafORs64.63

MDGANHSVVSEFVFLGLSNSWEIQLVLFVFFSMFYVASMMGNSLIMFTVT

FDPHLHSPMYFLLANLSFVDLGVSSVTSPKMIYDLFRKHKLISFGGCIAQ

IFFIHVIFGVELVLLIVMAFDRYVAICKPLHYLTIMSPRMCILFLVAAWM

IGLIRSVAQLAFVVNLPFCGPNVLDSFYCDLPGLIKLACTDTYRLEFIVM

ANNGFISVGFFFILIISYIIIILTVQKHSTAGLSKALSTLSAHITVVVLF

FVPLIFFSTWPSPSTYLGKFLAIFDAFLTSFLNPIIYTFRNREMKVAMWR

VSRQLVSYRKIS*

>LoafORs64.64P

VMLKLSNSWQI*LLRFCFCSLSYVSSMMETFS*WLLWPMNLTYPPLYVFY

CPTFPSLA*YFL*LQHTK*FVIFFRKGKSSP*YSSCLL*PCCWGTEMVPL

IAMVFDMWPFVSFSIT*SSGAHRCVYFF*SLPVSLDLSTQWSN*FLWSPL

DLPFCGSTILDSFHGDPPCLLRLVCTDTQELDFMVTINSGLISVVSFVL*

VISKVFILFSVLKHSSGGSSKALSTLSAYITVLVLFFGPLLVFYTWPSPT

SHLDMYLAIFDAVLSHFLNLVIYTLRNKDRNVSMKRLCNSLVHYRKV

>LoafORs64.65

MVGANYSVVSEFVFLGLSNFWEIQLALFVFSSMFYVVSLVANSLIILTVT

SHPHLHSPMYFLLPNCSFIDLGVSSVSSPKMIYDLFRKHRVISFSGCIAQ

IFFIHVIGGVEMVLLIAMAFDRYVAKCKPLHYLTIMSPQICISFLVSAWT

IGLIHSVGQLVFVVNLPFYGPNVLDSFYCDLPRFIKLACTDTYQLEFMVT

ANSVFISVGAFFILIISYIFIILTVQKHSLAGLSKAVSTLSAHISVVVLF

FGPLIFFYTWPSPSTHLDKFLAIFDAVLTPFLNLIIYTFRNQEMKVAMWR

VCRQLVSYRKIS*

>LoafORs64.66

MHGMNHSVVSEFVFLELTNSWEIQLLLFVFSFLFYFASMMGNLIIVFTVT

LDANLHSPMYFFLANLSVIDMAFCSITAPKMISDIFKRHKAISFGPCITQ

IFFSHVVGGTEMLLLIAMAFDRYVAICKPLHYLTTMSPQMCLFFLVTSWT

IGLIHSVTQLVFVVDLPFCGPNVLDSFYCDLPRFLRLACTDTQELELMVT

INSGLTSVGSFVLLVVSYIFILFNVWEHSSGGSSKALSTLSAHSTVVVLF

FGPLMFFYTWPSATSHLDKYLAIFDAVLTPFLNPAIYTLRNKEMKVAMKR

LCSGLGHYRKIS*

>LoafORs64.67

MDGANHSVMSEFVFLGLSNSWGIQLLLFFFSSMFYVASLMGNLLIVFSVT

YDPHLHSPMYFLLANLSFLDLGIFSIAAPKMIYDLFRTPKVISFEGCITQ

IFFIHAIGGTEMVLLTAMAFDRYVAICKPLHYLTIMSPRMCILILITSWI

LGFIHSVAQLAFVVDLPFCGPNVLDSFYCDLPQLIKLACTDTNRLEFTVT

ANSGLISVGSFFTLIISYIFILVTVQKHSSSGLSKALSTLSAHVTVVVLF

FGPLIFFYTWPFRSSHLDKFLAVFDAVLIPFLNPVIYTLRNKEMKAAMKK

LCYQLVSYRKFS*

>LoafORs64.68

MDVSNHSVVPTFVFLGLSNSWGIQLLLFFFSSMFYVASLMGNLLIVFSVT

YDPHLHSPMYFLLANLSFLDLGGCSVATPRMIYDLFRKHKAISFEGCITQ

IFFIHAIGDTEMVLLTAMAFDRYIAICKPLHYLTIMSPQMCILILITSWI

LGFIHSVAQLAFVVDLPFCGPNILDSFYCDLPQLIKLACTDTNRLEFIVT

ANSGLVSVGSCFILIISYIFILVTVQKHSSSGLSKALSTLSAHVTVVVLF

FGPLIFFYTWPFPSSHLDKFLAIFDAVLTPFLNPVIYTFRNKEMKAAMKK

LCHQFVNYRKLS*

>LoafORs64.69

MREENHSVVSEFVLVGLTSSLEIQLVLFLVFSVFYVAGILGNLLIVLTVV

SDSQLHSPMYFLLANLSFIDMWVSSSVVPKMISDVFKERKVISFQGCIAQ

MFFIHVVVGTEMVLLIIMALDRYVAICRPLHYLIIMNFQTCILLLVAAWI

IGIIHSLIQLVFVVNLPFCDHNEMDSFYCDLPRFIKLACTDTYRLELMVS

ADSGFISLGTFFILIISYIFILITVWQHSSSGLSKALSTLSAHITVVVLF

FGPCIFVYLWPFPMVPVDKFLGIFYVVITPFMNPAIYTFRNKEMKVAMRR

RLIQILSFRELF*

>LoafORs64.70

MREENHSVVSEFVLVGLTSSLEIQLVLFLVFSVFYVAGISGNLLIVLTVV

SDSQLHSPMYFLLANLSFIDMWVSSSAAPKMISDVFKERKVISFQGCIAQ

MFFIHVVVGTEMVLLMIMALDRYVAICRPLHYLTIMNFQTCILLLVAAWI

IGIIHSLIQLVFVVNLPFCDHNKLDSFYCDLPRFIKLACTDTYRLELMVS

ANSGFISLGTFFILIISYIFILITVWQHSSSGLSKALSTLSAHITVVVLF

FGPCIFVYLWPFPMVPVDKFLAIFYVFITPFMNPAIYTLRNKEMKVAMRR

LLSQILSFTKPF*

>LoafORs64.71P

MRGENHSVVS*FVLVGLTSSLEIQLVLFLVFSVFYVAGILGNLLTVLTVV

SESQLHSPMYFLLANLSFIDMWVSSSAAPKMISDVFKERKVISFQSCIAQ

IFFIHVVGGIEMVLLIIMALDRYVAICRPLHYLTIMNFQTCILLLVAAWI

IGIIHSLIQLVFVVNLPFCDHNEMGSFYCDLSRFIKLACTDTYRLELMVS

ANSGLISMGTFFILIISYIFILITVWQHSSSGLSKALSTLSAHITVVVLF

FGPCIFVYLWPFPMVPVDKFLAILDVCITPFMNPTIYTFRSKEMKVAMRR

LLSQILSFRNPF

>LoafORs64.72

MTGGNHSVVFEFVLVGLASSLETQLVLFLVFSVFYVAGILGNLLIVFTVI

SDFHLHSPMYFLLANLSFIDMWISSNIAPKMISDVFKKRRVISFQNCIAQ

MFFIHLIGGTEMVLLIIMALDRYVAICRPLHYLNIMNFQTCILLLVAAWI

IGIIHSLIQLVFVVNLPFCDHNEMDSFYCDLPRFIKLACTDTYRLELMVS

ANSGFISLGTFFILIISYIFICVSVWQHSSSGLSKALSTLSAHITVVVLF

FGPCIFVYLWPIPTVSVDKFLAIPDVFITPFMNPAIYTFRNKEMKLAMRR

LLSQIILKFKLF*

>LoafORs66.1

MKKDNQSMTNEFILIGFMDHPDLKTLLFVVFFAIYLITMVGNLGFVALIF

MERRLHTPMYIFLGNLALMDSCCSCAITPKMLENFFSEDRMISLYECMAQ

FYFLCLAETADCFLLAAMAYDRYVAICSPLQYHTMMSKKLCIQMITGAYT

TGNLHSLIHVVLLLRLTFCGSHQINHFFCDVLPLYRLSCVDPYINELMIL

IFAGSVQISTITIVLISYLCILFTIFKMKSKEGRSKALSTCASHFLSVSI

FYGSLLFVYIRPSSVKEGDKDMPVAVFYTLVIPLLNPFIYSLRNKEVINI

MKRIMKRKPHNIMK*

>LoafORs66.2

MNKDNHSLTKEFILIGFMDHPDLKTLLFMLFFAIYLITMVGNLGLVALIF

LERRLHTPMYIFLGNLALMDSCCSCAITPKMLENFFSEDRMISLYECMAQ

FYLLCLAETADCFLLAAMAYDRYVAICRPLHYHTMMTKKLCIQMIIGAYI

AGNLHSIIQVVLLLRLTFCGSHQINHFFCDVLPLYRLSCVDPYINELMLL

IFAGSVQIFSIAIVLISYLCILFTIFKMKSKEGRGKALSTCASHFLSVSI

FYGSLLFIYIGPSSFKEGDKDIPVAICYTLVIPLLNPFIYSLRNKEVINV

MKIMKSRKAHNILRQVSSS*

>LoafORs66.3

MNKDNHSLTKEFILIGFMDHPDLKTLLFMVFFAIYLITTVGNLGLVALIF

LERRLHTPMYIFLGNLALMDSCCSCAITPKMLENFFSEDKMISLYECMAQ

FYFLCLAETADCCLLAAMAYDRYVAICRPLQYHTIMPKELCIQMTTGAYR

AGNMHSITQVVLLLRLTFCGSHQINQFFCDVLPLYRLSCVDPYINELMIL

IFSGSVQTFSITVVLISYLCIVFTIFKMKSKEGRGKALSTCASHFLSVSI

FYGSLLFMYLRPSSFKEGDKDIPVAICYTLVIPLLNPFIYSLRNKEVINV

MKRILKTRKPHNILKQISSP*

>LoafORs66.4P

MNKDNHSLTTEFMLIGFMDHPDLKTLLFVVFFAIYLITMVGNLALVGLIF

MKRRLHTPMYIFLGNLALIESCCSCAINPKMLENFFSEDRMISLYECMAQ

LYFLCFAETADCFLLAAMACDRYVAICHPLQYHTMMSKKLCIQMIIGAYI

AGNLHSIIHVVFLLRLTFCGSHQINHFFCDVLPLYRLSCVDPYINALMVF

IVAGSVQIFSIIIVLISYLCIFFTIFKMKSKEGRGKALSTCASHFLSVSI

FYGSLLFMYILPSSIKEGGKDIPVAICYTLVIPLF**FLY*TYSLRNKEV

INVMKRIMKNRKPHNILKQISSP

>LoafORs66.5

MICISTEKVEMTEDNYSLTTEFMLIGFMDKPGLKILLFVVFFAIYLITMV

GNLGLVALIFMERRLRTPMYIFLGNLALMDSCCSCAITPKMLENFFSEDR

MISLYECMAQFYFFCFAETADCFLLAAMACDRYVAICRPLQYHTMMSKKL

CIQMITGSYLAGNLHSIIHVVFLLRLTFCGSHQINHFFCDVLPLFRLSCV

NPYINELMLLIFSGSIQIFTISIVLVSYLCILFTVLKMKSKEGRGKALST

CASHFLSVSIFYGSLLFMYIRPSSVKEGYKDIHVAIFYTLVIPLLNPFIY

SLRNKEVLNVVKRIMKNRKPHNILKQISPVTN*

>LoafORs66.6P

FLDHLAMKTILFVMFLLSTCVGESWSGGVDFHGAPSPYTKIHIFLGNLAL

MNSCCSWAITKLLKNFSEGRMISLYE*MAHFYFPCLVETADCFLLAAMT*

DCYMAICSLLQ*HIMISKKLCIHMTIGNFITSNLHSMIPVVLLLGLTFCR

PNQVDHFFVIFCHCTDYSVLIHLLMN*VYTFFNAYSNLCRCHCLDLLSLH

PFHNF*NEIQNGRRKAFSTYASHFLSVPIFYFCLLMCT*PFEEGDTDILW

KFFV**QFLY*TLIFIV*ERRR*CVLKKINGNYNIPKQT*SST

>LoafORs66.7P

IISTSTEKVEMTQDNHSLTTEFMLIAFTDHPGLKILLFVVFFAIYLITMV

GNLGLVALIFMERRLRTPMYIFLGNLALMDSCCSCAITPKMLENFFSEDR

MISLYECMAQFYFFCLAETADCFLLAAMAYDRYVAICRPLQYHTMMSKKL

CIRMTTGAYIAGNLHSLIHVVLLLRLTFCGSHQINHFFCDVLPLYRLSCV

DTYINKLMLLIFSGSVQIFTITVVIISYLCILFAIFKMKSKEGKAK/KGK

ALSTCASHFLSVSIFYGSLLFMYIRPSSVKEGHKDIPVAIFYTLVIPLLN

PFI*SLRNKEVINVMKGIVKKRKPHNILKQISPVTN

>LoafORs66.8P

LDNLALMVSYCSCAITFKILEILENSFSEGRMISLYECMVQFYFLCLAET

VDCFLLAAMSYDHYVARCSPLQYHTMMPKKLCIHVTT*TFITSNLHSIIH

VVLLLRLTSAGLIKSTTFL*YFALIQIILY*TFY*QTNDIYFFKAC*NLH

HCHCLHSLHPFHDFQDEIQNSRSKAFSTCASHFLSVSFVFSCVFDHLKNR

IKNTSGNFLYTIKLLNPLLNPFIYSLRNKEVI

>LoafORs66.9

MTQDNHSLTIEFILIGFTDHPDLKALLFVVFFAIYLITMVGNLGLVALIF

MERRLRTPMYIFLGNLALMDSCCSCAITPKMLENFFSEDKMISLYECMAQ

FYFLCLAETADCFVLAAMAYDRYVAICRPLQYHTMMSKKLCIQMTTGAYI

AGNLHSMIHVVLLLRLTFCDSRQINHFFCDVLPLYRLSCVNPYVNELLIL

IFSGSVEIFSITTVLISYLCILFTIFKMKSQEGRGKALSICASHFLSVSI

FYGSLLFVYIWPNSFKEDDKDIPVAIFYTLVIPLLNPFIYSLRNREVLNV

MKRIMKKRKPHNILKQRSFVTN*

>LoafORs66.10P

FCVILILYRLSCTDCFIIKLKKYIFSIFFFIQIFTITTVSISYLCILFTV

LKMKSKLGRGKTFSTGESHFLSVSVFYICRLMYIQPFEEEDKDIPLAIFF

>LoafORs66.11

MKKDNQSMTNEFILIGFMDHPDQKTLLFVVFFAIYLITMVGNLGLVALIF

MERRLHTPMYIFLGNLALRDSCCSCAITPKMLENFFSEDRMISLYECMAQ

FYFLCLAETADCFLLAAMAYDRYVAICRPLQYHTMMSKKLCIQMTIGAYI

AGNLHSIIHVVLLLRLTFCGSHQINHFFCDVLPLYRLSCVDPSINELMIL

IFSGSIQTFTITVVLISYLYILFTIFKMKSKEGRGKALSTCASHFLSVSI

FYGSLLFVYIRPSSVNEGNKDIPVAIFYTLVIPLLNPFIYGLRNKDVIII

MKTIMNNRKSHNILE*

>LoafORs66.12

MNKDNHSLTKEFLLIGFMDHPDLKTLLFMVFFAIYLITMVGNLGLVALIY

MERHLHTPMYIFLGNLALMDSCCSCAITPKILENFFSEDRMISLYECMAQ

FYFLCLAETADCCLLAAMAYDRYVAICRPLQYHTMTSKKLCIQTTIGAYI

AGNLHSIIQVVLLLRLTFCGSHQINHFFCDVLPLYRLSCVDPYINELMLL

IFAGSVQIFSIAIVLISYLCILFTIFKMKSKEGRGKALSTCASHFLSVSI

FYGSLLFIYIRPSSFKEGDKDIPVAICYTLVIPLLNPFIYNLRNKEVINV

MKIMKSRKAHNILRQVSSS*

>LoafORs66.13

MNKDNHSLTKAFILIGFTDHPGLKILLFVVFFAIYLITMVGNLGLVALIF

LERRLHTPMYIFLGNLALMDSCCSCAITPKMLENFFSEDRMISLYECMAQ

FYFLCLAETADCCLLAAMAYDRYVAICRPLQYHTMMSKKLCIQMTTGAYI

AGNMHSIIQVVLLLRLTFCGSHQINHFFCDVLPLYRLSCVDPYINELMIL

IFSGSVQTFSITVVLISYLCILFTIFKMKSKEGRGKALSTCASHFLSVSI

FYGSLLFMYIRPSSIKEGDKDIPVAICYTLVIPILNPFIYSLRNKEVINA

MKRIMKYRKPHNILKQISPP*

>LoafORs66.14P

MNKDNHTLTTEFIFIRFMDHSDLKTFLFVVFFAIYLITRVGNLGLVAFIF

SWSTVSTHQCTSFWVTWL**IAVVPMSSPPRFSEDRMIFLYECTTQFYFL

YLAETAYCFLLATLASYPFVAICRPLQDHTMMSKKLCTHIITGTFIASNL

HSMIHVMLLLRLIFCRSNQ*NTFLKIYLPLHRLSCIDLLLMICIFSSPFQ

IFIIASILVSYLCILFTIFR*NPKRGVIRTSLLCIPLSLCIGSLLLSSHI

YLTI*RRG*KYIFGNF*FNSNSFVKLICSLRNKEVITAVKEKNTKYNILK

QTSSMSS

>LoafORs66.15

MKKDNHSLTTEFMLIGFMDHPDLKTLLFVLFFAIYLITMVGNLGLVALIF

MKRRLHTPMYIFLGNLALMDSCCSCAITPKMLENFFSEDRMITLYECMAQ

FYFLCFAETADCCLLAAMAYDRYVAICRPLHYHTMMSKKLCIQMITGAYI

AGNLHSIIQVVLLLRLTFCGSHQINHFFCDVLPLYRLSCVDPYINELIVF

IFAGSVQIFSITIVLISYLCIVFTIFKMKSKEGRGKALSTCASHFLSVSI

FYGSLLFMYILPSSIKEGSKDIPVAICYTLVIPLLNPFIYSLRNKEVINV

MKRIMKNRKPHNIPKQISSP*

>LoafORs66.16

MADENHTMKNEFILTGFMDHPELKTLLFVVFFAIYLITMVGNVGLVILIS

KECRLHTPMYIFLGNLALVDSCCACAITPKMLKNFFSEDRMVSLYECMAQ

FYFLCTVETADCFLLAAMAYDRYVAICSPLHYHTMMSKKLCIQMTTGAYI

AGNLHSMIHVELLFRLAFCGSNQIHHFYCDILPLYRLSCVDPYVNELVLF

IFSGSIQAFTIGSVLISYLYILLTIFEMKSKKGRVKAFSTCASHFLSVSL

FYGSLFFMYIRPNLLEEGDQDIPAAVLFTVVVPLLNPFIYSLRNKEVISV

LRKILKVKPQKTLKQMTATVD*

>LoafORs66.17

MADENHTVKNEFILTGFMNHPELKTLLFVVFFAIYLITMVGNVGLVILIS

KECRLHTPMYIFLGNLALVDSCCACAITPKMLKNFFSEDRMVSLYECMAQ

FYFLCTVETADCFLLAAMAYDRYVAICRPLHYHTMMSKKLCIQMTTGAYI

AGNLQSIIHVGLLFRLAFCGSNQINHFYCDILPLYRLSCVDPYVNELVLF

IFSGSIQVFTIGSVLISYLYILLTIFKMKSKEGRVKAFSTCASHFLSVSL

FYGSIFFMYIRPNLLEEGDQDIPAAVLFTVVVPLLNPFIYSLRNKEVISV

LRKILKIKPQESLKQMTATVD*

>LoafORs66.18

MADENHTMKNEFILTGFMDHPELKTFLFVVFFAIYLITMVGNLGLVILIS

KEHHLRTPMYIFLGNLALVDSCCACAITPKMLKNFFSEDRMVSLYECMAQ

FYFLCTVETADCFLLAAMAYDRYVAICRPLHYHTMMSKKLCIQMTTGAYI

AGNLHSMIIVGLLFRLAFCGSNQINHFYCDILPLYRLSCVDPYVNELVLF

ISSGSIQIFTICSVLISYLYILLTIFKMKSKEGRVKAFSTCASHFLSVSL

FYGSLFFIYIRPNLLKERDQDILAAILFTTVVPLLNPFIYSLRNKEVLSV

LRKILKIKSQESLKQMTATVA*

>LoafORs66.19P

HV*TDMTFLLNSLSNKESTLEKKSFTSTTVPKMPLSIQMQNKVIYADCIT

HVYFFSFLLLDYFLLTAVAFDCFVEICHPCTTQSHEPLACQHAGGPSQEL

ACVAAFFLWGH*NPALFHKLSEFLKLTCSTTFINNIVL*ILSGIMGFFPL

TGIFFSYAQIVYSVRSITTEG

>LoafORs71.1

MEDANQTEMIHFHFRPFSKLSEVQMLIFVAFLIMYLVSISGNFSISIIIW

IHHSLHTPMYFFLANLAALEICYSSTIAPLTLASILSPERTIISLPGCGT

QMFFFIFLGSADCILLALMAYDRFVAICHPLHYTHIMSRRLCAQMTLGSL

VLGFTLAVQLTVLIFRLPFCSSKEISLFYCDVLPVMRLACADTRVHEATL

FVVGVTVLTIPFLLIILSYVFIVAAILKICSAEGRHKAFSTCSSHLTVVL

LQYGCGSLIYLCPSSRYSPERGQVVSVVYTFITPVLNPLIYSMRNRELKD

ALKRAMMRFLLPQT*

>LoafORs71.2T

MENANQTGMIHFHFHPFSKLPEVQMLIFVAFLIMYLVSISGNFSISIIIW

IHHSLHTPHVLLPGNLQPWRSAIF

>LoafORs71.3P

MEGINKTSKTQFFFCPFSTHSEVQMVIFVAFLVMYLISLSGNATIAVTVH

GNHSLHTPMYFFLSNLAVLEIFYTSCIAPLALAN/PTGFS*LLSMGKTSV

SITGCGTQMFFFVFLGGADCVLLAVMAYDRLIAICYPLRYTLLMSWPLCV

VLVAGSLVLGFLLSLPLTILIFHLPFCNNNEIYHFYCDMPAVMRLACADT

HVHETALSIISFIVLSIPLSLISISYIFIVAAILRIRSAEGRHRAFSTCS

SHIIVVLLQYGCTSYIYFSPSSRYSPEMGRVVSMVYTFITPILNPLIYSM

RNKDLKVALRKTLRKF

>LoafORs71.4P

MRDENQTGEIQFHFQPFSPILEVQMFIYVSFLLMYIGSLIGNATIFLTIW

AVRSLHIPMYFFLANLAVLEIFYSSTVAPLALVNLLAMGKIPISFTGCGT

QIFFFVFLGSADCILLGIMAYDRFVAIQDPLSYSLVMRWLLCAQLAVGAL

VLGFILALLLTLFIFHLPFCGHNRITHFYCDVLPVLRLACGDTQMPEAMI

FITSVIILTIPFSLISISYIFIVATI/LKIRSAEGRHKAFSTCSSHLTVV

LLQYGCCSLIYLRPSSSYNPEMGRVVSVVYTFVTPILNPLIYSMRNKELK

DALNKVLKSHVL

>LoafORs71.5

MALGNYTRVPEFIFCGLTQSQELSLLLFFFLSMVYVTTVLSNVAIIVTVT

CESRLHTPMYFLLRNLSALDICLPSITAPKVLADLLSRTKTISFNGCITQ

MFFFHFLGGADVFSLSVMAFDRYMAISKPLHYVTIMSKGRCTALIVASWV

GGLVHSIVQIFLLLPLPFCGPNVVDGFYCDVPQVLKLACTDTFALELLMI

SNNGLVSTLWFVLILVSYTVILMMLRSHTGEGRRKAISTCTAHITVVTLH

FVPCIYVYARPFTALPMDRVVSITFTVIIPVLNPMIYTLRNQEMKSAMRR

LKRRLGHSTKGVDSMMSRLGSQN*

>LoafORs71.6P

ESCVHTPMYFLLKNKSVLYIVFSSISVPKLLVDLLSKRKTISYNGYMAQI

FFFHFAAGAGIFSLSVMA/ISKPLHYVTIMRTEIWVTLLVASWIGGGLHS

IVQIILILLLPFCGPNTLDAFYCDVPQVVKLTCIDTFALEHLLISNNELV

TLLWFLLLLGSYTVVQVIL*SHSGEEWNKAFSVCISHILVVTLPFVPGVY

MYCQPFIILPMDIATSINNIVITPMLNHLIYTLRNQEMKSAMRRIQRWLQ

SSENSKLG

>LoafORs71.7

MALGNYTRVPEFIFCGLTQSHELSLILFFFLSVVYVTTVLANIAIIVTVT

CESRLHTPMYFLLRNLSVLDICFSSITGPKVLGDLLSRTKTISFNGCITQ

MFFFHLLGGADIFSLSVMAFDRYMAISKPLHYVTIMSRGRCTALIVASWV

GGFVHSIVQISLLLPLPFCGPNVIDGFYCDVPQVLKLACTSTLALELLMI

SNNGLVSTLWFVLILVSYTVILMMLRSHTGEGRRKAISTCTAHITVVTLH

FVPCIYVYARPFTALPMDRAVSITFTVIIPVLNPLIYTLRNQEMKSAVKR

LKRRLGRSTKGVDSVKSRLGSQN*

>LoafORs71.8P

EQKTISFVDCAAQFFFFFVGMRLAECFFLTAMVYDQYAAISNLLLYTTIM

SQNLCIRMLVWSYVGGFLSSLIHATSIFQLHFCGPNIINHFFCNLPPVLT

LSCSDILLSQAVNFLFVVAVERTLFFILLISYSYILAAVSKIHSMEGQWK

AFNTYASHLIVVTLLFGTAFFMHL*PSSSYSLGRNKVVSVFFSL*SP/FL

LTVIPMLNPLIYSLRNKEIKDGLWKVLEKKVFS

>LoafORs71.9

MAPGNYTRVSEFIFCGLIQSQELSLLLFFFLSMVYVTTVLANVAIMVVVT

CDPHLHTPMYFLLCNLSVLDICFSSITAPKILVDLLSRTKTISFDGCIMQ

MFFFHFLGGADIFSLSVMAFDRYIAISKPLHYVTIMSRRKCTTLIVASWV

GGFVHSIIQICLLLPLPFCGPNVVDGFYCDVPQVLTLACTDTFALELLMI

SNNGLVSTLWFILILVSYTVLLMMLRSHTGESRRKAISTCTAHITVVTLH

FVPCIYVYARPFTALPMDRVVSVIFTVISPVLNPMIYTLRNQEMKSAMRR

LKRRPGPSTKGTDSMKFRLRSQT*

>LoafORs71.10

MALGNYTRVPEFIFCGLTQSQELSLFFFLFLSAVYVTTVLANIAIMVTVT

CESRLHTPMYFLLRNLSVLDICFSSITAPKVLGDLFSRTKTISFNGCITQ

MFFFHLLGGADIFSLSVMAFDRYMAISKPLHYVTIMSRGRCTAFIVASWV

GGFVHSIVQISLLLPLPFCGPNVIDGFYCDVPQVLKLACTDTFALELLMI

SNNGLVTTLWFVLILVSYTVILMMLRSHTGEGRRKAISTCTAHITVVTLH

FVPCIYVYARPFTALPMDRAVSITFAVIIPVLNPMIYTLRNQEMKSAMRR

LKRRLGPSTKGTDSMTFRLRNQN*

>LoafORs71.11P

MGQDNCTNVKEFVFLELACFQELECFLFVAFLVVYITTVLSSVLIVVTIT

CESHFHTHMYFLLLNKSVLDFFFFSSITIPKFLVDLLSKRKTIHYPTMPA

WHRFFFFFHFACGVDIFSFSVMPYDRYLAIAKPLHYVTLMRREVWVTLVV

ASWMRGGLHSIVQIILMLPVPFCGLSILDVMCPR**NWPLLWSFSMISNN

RLVTLLLFLLLLGSYTFILVMLQSHLERG/LVVSLHFVPSIYICCQPLIT

LPMDLVISINNTVITPMMNPMIYTLRNQEMKSAMRRLQRQFESSQSNKLG

>LoafORs71.12

MALGNYSRVPEFIFCGLTQSQELSFLFFFFLSMVYVTTMLANIAIMVTVT

YESRLHTPMYFLLCNLSVLDICFSSITAPKIVVDLLSRTKTISFNGCIIQ

MFFFHLLGGADVFSLSLMAFDRYMAISKPLHYMTIMSRRRCTALIVVSWV

GGFVHSIVQISLLLPLPFCGPNVIDGFYCDVPQVLKLACTDTFALELLMI

SNNGLVATLWFVLILVSYAVILMMLRSHTGEGRGKALSTCTAHITVVTLH

FVPCIYVYARPFTALPMDRVVSITFTVISPVLNPIIYTLRNQEMKSAMRK

LKRRFAASTKRVDSMKSTLGSQN*

>LoafORs71.13

MGQENHTNVKEFVFLELTCFQELECFLFVVFFVVYITTILGNVLIVVTVT

CESHLHTPMYFLLRNKSVLDIVFSSITVPKFLVDLLSERKTISYNGCMAQ

IFFFHFAGGADIFFLSVMAYDRYLAIAKPLHYVTIMRREVWVTLVVASWM

GGGLHSIVQIILMLPVPFCGPNILDAFYCDVPQVVKLACTDTFALELLMI

SNNGLVTLLWFLLLLGSYTVILVMLQSRSGEGRNKALSTCTSHILVVTLH

FVPCVYIYCRPSITLPMDRAISINNTVITPMLNPMIYTLRNKEMKSAMRR

LKRQLWSSESTKLG*

>LoafORs71.14P

SYIVSAVLKIH*VEVQWKAFNTHASQLMVVTLFFGMAFFMYLGPSSSKLL

GRDKLISLFYSLVIPMLSPLIYSLRNKETKNTLWKVLENKKVFS

>LoafORs71.15

MALGNYTRVTEFIFCGLTQTQALSFLLFFFLSMVYITTVLANIAIIVTVT

SDSRLQTPMYFLLCNLSALDICFSSITAPKILVDLLSRTKTISFNGCITQ

MFFFHLLGGADVFSLSLMAFDRYMAISKPLHYMSIMSGGRCTVLIVASWV

GGFVHSLVQISLLLPLPFCGPNVVDGFYCDVPQVLKLACTDTFALELLMI

SNNGLLTTLWFVLILVSYTVILMMLRSQTGEGRKKAISTCTAQITVVTLH

FVPCIYVYARPFTALPMDRVVSITFTVFSPVLNPMVYTLRNQEMKSAMRR

LKRRLGPSKKEIDAMKSRLGSQN*

>LoafORs71.16P

SYIVSAVFC*VEGQWKAFNTCASHLMVVTLFFGMAFFMYLEPSSSNSLGR

DKLVPLSSSLVIPMLNPLIYSLSDKETKDALWKVLENKVFS

>LoafORs71.17P

KGDIPSCTPTMYFLSSATCPSLIPATLS*WLPRSS*ILPGAEDHIICEMC

SSVFFFFFVGMGLTDCFLLTATAYDQHAAISSSLFYTTILFQGLFTQMLV

GAYIGGFLSSLIQAASI*RLCFCGPNIINHFFCNLPPVLALSLSDTFLSQ

VVNFLTVVALVGTSFLIV

>LoafORs71.18

MALGNYTRVTEFIFCGLTQTQALSFLLFFFLSMVYIITVLANVAIIVTVT

SDSRLHTPMYFLLCNLSALDICFSSITAPKILVDLLSRTKTISFNGCITQ

MFFFHLLGGADVVSLSLMAFDRYMAISKPLHYITIMSGGRCTALIVASWV

GGFVHSLVQMSLLLPLPFCGPNVVDGFYCDVPQVLKLACTDTFALELLMI

SNNGLLTTLWFVLLLVSYTVILTMLRSHTGEGRRKAISTCTAQITVVTLH

FVPCIYVYARPFTALPTDRVVSITFTVFSPVLNPMVYTLRNQEMKSAMKR

LKRRLGPSKKEIDAMKSRLGSQN*

>LoafORs71.19P

LSTCTSHILVMTIHFMPCVYISCQPFIKLPMVEIISINNVVITSMLSPII

YTLKNQEMKSAMERL*RGLQPSESNNLG

>LoafORs71.20

MSIAKAWNSSSVTVFILLGFTDYPELQALLFVTFLGIYLVTLAWNLAFIF

LIKSDTHLHTPMYFFLSNLSFIDICYSSTVAPKMLIDFFLEQKTISFVGC

AAQFFFFVGMGLTECFLLTAMAYDRYAAISSPLLYTAIMSQDFCTRMVVG

AYVGGFLSSLIQATSIFQLHFCGPNIINHFFCDLPPILALSCSDTFLSQV

VNFLVVVAVGGTSFFILLISYSYIVSSVLKIRSVEGQWKAFNTCASHLMV

VTLLFGTALFIYLRPSSSYSLGKDKVVSVFYSLVIPMLNPLIYSLRNKEI

KDALLKMLEKKKVFS*

>LoafORs71.21

MTANTPMEWNGNQSSVTMFVLQGLSDEKDLQLILFPIFLVIYLVTLIWNL

GLILLIRMDSQLHTPMYFFLSFLSFIKNICYSSSISPRMLSDFLKNEKTI

SFITCATQYFVAVWMGLAECCLLAAMAYDRYVAIGSPLQYSAIMAPGLCG

KMVAGVCVTGFLSSLSLTVSCFNLYYCGPNIIQHFFCDLPEIIPLSCSNL

FVSQIILLLAAIFIVFGSLLVTLLSYGFIAASILKISSGKGSAKAFNTCA

SHLAAVTLFFGTALSVYMHSSSSHSRKQDKVLSVFYVTLIPMLNPLIYSL

RNKEIKGALKRVIKRTTY*

>LoafORs71.22

MTSSRSMEWKGNQSSVAMFFLLGLSSEKELQLILFSIFLGIYLVTLIWNL

GLILLIRMDSQLHTPMYYFLSFLSFIDICYSSSISPRMLSDFLRKEKMIS

FIACATQYFVTAWMALAECFLLAAMAYDRYVAIGIPLQYSAIMVPDLCGK

MVAWAYVTGFFSSLIQTVSCFQLYYCGPNIIQHFFCDLPNIISLSCSNPF

ICQMILLLVAIVVGFGTLFVILLSYGFIAASILKISSGKGSTKAFNTCAS

HLVAVTLYYGTALSVYLSPKSNQSMKRDKVLSVFYVIIIPILNPLIYSLR

NKEIKEALNRFIKREIAFH*

>LoafORs71.23P

MASNRPMEWNGNHSTVTMFILLGL/VSDGKELQLILFPIFLGIYLVTLIW

S/LILLVGLILLIRMDSQLHTTMYFFLSFLLFIDICYSSSISPRMLSEFL

KDEKRISFIACASQYCVVAWMGLAECCVLAAMAYDRYVAIGSPLRYSAIM

APVLCGKMVAGAYVTSFLSSLSQTVPCFNLYYCGPNIIQHFFCNLHQIIS

LSCSSVFTTQITVLLASIFIAFGSLLVILLSYFFIAASVLKISSGKGSAK

AFNTCVSHLAAVTLYDGTALSVCMRPSSSQSMKQDNVLSIFYVILIPMLN

PLIYSLRNKEIKAALKRVIKRTAY

>LoafORs71.24

MAASRPMEWNGNHSSVTMFVLLGLSDKKELQLILFPIFLGIYLVTLIWNL

GLILLIRMESYLHTPMYFFLCFLSFIDICYSSSISPRMLSDFLKNEKMIS

FISCATQYFVAAWMALAECCLLATMAYDRYVAIGSPLQYSAIMVPDLCGK

MVAGAYVSGFLSSLSQTISCFQLYYCGPNIIQHFFCDLPQIISLSCSNPF

TTQMTLLLVAIVVGFGSLFVILLSYGFIAASVLKISSGKGRAKAFNTCAS

HLAAVTLYYGTALSVYLSPKSNQSMKRDKVLSMFYVIVIPILNPLIYSLR

NKEIKEALKRLIKRPTALCQNSIWAGIITMEGRWR*

>LoafORs71.25P

MTSSRSMGWNGNHTSVAMFVLLGLSDEKELQLILFPIFLGIYLVTLIWNL

GLILLIRKRTSACTHPCTFFSVSCHL*TSAILLPSAQGMLSDFLKNEKMI

SFIACATQYFVAAWMALAECCLLATMAYDRYVAIGSPLQYSAIMVPDLCG

KMVAGAYVSGFLSSLSQTVSCFQLYYCGPNIIQHFFCDLPQIISLSCSNP

FIAQMTLLLVAIVVGFGSLFVILLSYGFIAASILKISSGKGRAKAFNTCA

SHLAAVTLYYGTTLSVYLCPKSNQFMKQDKVLSVFYVIIIPILNPLIYCL

RNKEIKEALKRLIKRTAALC/QNNIWAGVITV*GRWR

>LoafORs71.26

MAANRPVEWSGNHSSVTMFVLRGLSDEKELQFILFPIFQGTYLVTLIWNL

GLILLIRMDSQLHTPMYFFLSFLSFIDICYSSSISPRMLSDFLKDENMIS

FIACVIQYFVVAWMGLAECCLLAAMAYDRYVAIGSPLQYSAIMAPGLCGK

MVTGVYVSGFLSSLSQTVSCFHLYYCGPNIIQHFFCDLPAIIPLSCSNPF

ISQVILLLATIFFVFGSLLVTLLSYGFIVASILKISSGKGSAKAFNTCAS

HLAAVTVFFGPALPVYMHSSSSQSMKQDKVLSVFYVILIPMLNPLIYSLR

NKEIKGALKRVIKRTIY*

>LoafORs71.27

MTSSRSMGWNGNHTSVAMFVLLGLSNEKELQLILFPIFLGIYLVTLLWNL

GLILLIRMDFRLHTPVHFFLCFLSFIDVCYSSSISPRMLSDFLKNEKMIS

FIACATQYFVAAWMALAESCLLATMAYDRYVSIGNPLQYSAIMVPDLCGK

MVAGAYVSGFLSSLSQTISCFQLYYCGPNIIQHFFCDLPQVISLSCSNPF

IAQMSLLMVAVVVGFGSLLVILLSYGFIAASILKISLGKGCDKAFNTCAS

HLAAVALYYDTTLSVYLCPKSNQFMKQDKVLSVFYVIIIPILNPLIYCLR

NKEIKEALKRLIKRVVALCQSE*

>LoafORs71.28

MAANRPMEWNGNRSSVTMFVLRDLSDEKELQLILFPIFLGIYLVTLIWNL

GLILLIRMDSQLHTPMYFFLSFLSFIDICYSSSISPRMLSDFLKDENTIS

FIVCAIQYFVVPWMGLAECCLLAAMAYDRYMAIGSPLQYSAIMAPGLCGK

MVTGVYVSGFLSSLSQTVSCFHLYYCGPNIIQHFFCDLPAIIPLSCSNPF

ISQIILVLEAIFIVFGSLLVTLLSYGFIAASILKLSSGKGSAKAFNTCAS

HLAAVTLFLGTALSVYMHPSSNHSRKQDKVLSVFYVILIPMLNPLIYSLR

NKEIKGALKRLIKRTIY*

>LoafORs71.29T

LQLILFPIFLVIYLVTLIWNLGLILLIRVDSHLHIPMYFFLSFLSFIDIC

YSSSISPRMLSDFFEDEKRISFIACATQYFVVAWMGPAECCLLAAMAYDR

YMAIGSPLQYSAIMAPGLCGKMVAGACVSGFLSSLSLTVSCFQLYYCGPN

VIQHFFCDLPQIIPLSCSNPFISQMILLLVAIVVGFGSLFVILLSYGFIA

ASILKISSGKGSAKAFNTCASHLAAVTLYYGTTLSVYLCPKSNQTMKQDK

VLSVFYVIIIPILNPLIYSLRNKEIKEALKRLIKRATALYQSE*

>LoafORs72.1P

MSSNLAIILLVGTYQRLQMPMYFLLCNLSFLEMLFTLACMPKTLTTFASC

RGAIFFPGCGLLAHLSFCSSHFINYFLCDIAPWIRFACSDVGCGGGHLHH

HLLHHPGSCFVTLISCGHIVATVVCICSVCDRHKAFSTCSSSLAVMLI*W

GSTIFLHVWVSLESLLDLIKAIAVFNTIVTQCTTP/PVHNSFIYTLWNKD

VKDTL

>LoafORs72.2P

DNHSEVTEFILLGFSGSRGLHLSLLALFLLDYMLTVMEYMVIVAVIHTSP

LLHKPMYLFLSHLSFLEAWYVSVTVSKILVRLVDLECQHISFTGCMAQLY

FFLALACTECMLLGVMAYDRDTAICCPLRYPS

>LoafORs72.3

MAAGNHTAVAEFVLEGFSEDLWLWGLLIALFLLLYLTALAGKSLIVTAIS

LSPGLHAPMYFFLAKLAILDIVCTSMILPKLLESLVVWVDIISCGGCLAQ

LFFLTWFLGAELLLLTAMAFDSYVAICWPLCYSTIMSRPLCALLASAVWT

VSVINASVHMGLMAQLTFCGPNHIWDFLCEIPMLLLLSCSPAALNKVTII

IAAVCFGMVNFLLTLASYSCIVASVLHKRSAEGKRRAFSTCSSNLLVVTL

YYSTITYTYILPGSGTSMEKSKVVAVLYTVVSPALNLLIYTLRNKDVKAD

FRKLAPSSW*

>LoafORs72.4P

NHTLVTEFLIQGFSKVPRLQVLLFAVFLILYVVALSGNLLIVVAISTNPT

LHTPMYCFLVNLAAVDILCTSTILPKVLESLVVPGDTISYGGCLAQLFFF

TWALGAELLLLSAMAYDRYVAICRPLH/LMGPRACTMLAMAVWAVSLTNT

SVNMGLMVHLLFCHSNVVEHFFCEIPPLLKLACAPTHLSEAMAFAADVFL

AVGNFSVTLASYGCIMANILRIHSALGKSHAFSTCSSHLLVVSMYYSTVI

YTYIRPASNYSLDRDEVVSIIYTSVAPTLNPLIYTLRNTEVKAALRQL

>LoafORs72.5P

VTEFVLQGFSEMPQLQVLLFVLFLTL*TVAFCGNSLTVTAVISGSALHTT

MFFLLVNLVVLDVACACAVVPKLLEILVAEKRTIS*EG/MTQMFFLSWSM

ATEVLLFTAMAYD*YLAICQPLHYSSMINSRVCAVLVGAVWSINVLGAGV

NTCLISRLTFCGPNMIDHFLCEIPSLLLL/LHSCSSTHVNDIMAIMMDIF

AVLNFLLTMVSYCFIISTILKIRMAKGKHHAFSTCFSHLILVTMYYSTVD

NTYLSPGSSYSRGMGKIMTMLYSTVNPTLNSLIYIFRNKDVKAALKKVF

>LoafORs72.6

MAVGNQTVTMFVLQSFTQDPWLEVALFCLFFTLFTVALGGNSLIIAAICC

SSSLHIPMYFFLVNLAVLDMVCTSSILPKVLQSLIADSTISFRGCLSQMF

FFTWSLSSELLLFTAMAYDRYLAICRPLHYGALMSGRACVVLAAFVWVTG

VFNASLLTGLVLRLKFCGPNVIAHFFCEIPPVLLLSCSPTFLNDVMTITA

DMFLSGLNFTLTMVSYSCIIASILSIRSAKGKRRAFSTCSSHLIVVTLYY

STVLYTYVLPALGSTGLLDKAVAVLYTTVTPTLNPLIYTLRNKEFKAALK

KLFPCSPK*

>LoafORs72.7P

ILQGFSEMSQLQFLFFIPFLNLYTMALCGNSLIVMGIIFSSRL/GCMTQM

FFLTWSIAAELLVFTAMAYAATWPSTSTYTTSRMSPHLCLALAGAVRSIS

MLGARINTWLMLQLTFCGLNRTKHFFCDFFLLLLLSCSYTYVNDIMTLVT

DIFTDLNFLLTMVSYGLIISTILKICMAEGKCHTFSTSFSHLTVVTMY*S

TVIYAYLSPNSSYSPAVGKALAMLYFTESSTLNTLIYTLRNKDFKAIIKK

V

>LoafORs73.1P

FMAICHLLHYLVMVNPQLCGLLVLGSWCLSVMSSLVETLTISSLFFCTYM

AISHLF/VMHFVTGLLVLIPFTRVRFSYYQIVSSILRISSARGNHKLFSN

RVLSHL*AVSLFNGTSLGVYLSSAATLSCRPSLMTSVVYRLRNRDMKGVL

GRLCIRELPLSH

>LoafORs76.1P

LKNHTKNIEFILLGLTDNSQLQIVIFLFLLLSYVLSMIGNVTIFALTLLD

SHLKTPMYFFLCHFSFLEISFTTACIPRFLSTTVAREKTISYNGCMSQLF

F*YLFGGYRVF/NSWVTSFLIIFPPLIFCLNLDFCASNIIDHFICDIFPV

LQLSCSDTHLLELIAFLIALMTIIVTLLLVIISYSYIIKTILKFPSTQQK

KKGFSTCSSHMIVVSITYGSCIFMYIKPSANERVNLSKGVAVLNTSLAPL

LNPVI

>LoafORs76.2P

MRNHTMITEFVLLGISDDPKLQAVVFIFLFIAYVLSVTGNLTIIILTLID

SHLKTPMYYFLWNFSFLEITFTTVSIPRFLGAVITKVKTISYNNCLAQLF

FFTFMSVSEFFLLSAMSYDRHVATCKPLHYTTIMKKKICTLLVLCAWLGG

FLTIFPSLMLMLRLDFCSSNVIDHFPCDHFPVLQLSRTDTWPLEMIGFYL

AFVTLLFTLALVILSYSRIVITTLRIPSASHRKKAFSTCSSHMIVISISY

GSCIFMNVKPSAKEE/SKRRASLTKGVAILNTSIAPMLNPFIYTLRNQQV

KLAFKDLIHKIGFPENK

>LoafORs76.3P

RTRETELILLRLTDDPQLQIVVFIFFFLNYILNVVGNLSIILLSLLDPRL

KTPMYFFL*NFSLEILLTTICIPRFLTTIVTKTKSFPTMVVYLNYTFFSY

*EMYSFSFWLPCLMTVT*LSGNSCVIQSL*AAKCATNLHSVRGQLAF*IS

IFPPLILGLKL*FCVSNVMDCFIWNTSPLLQVSCTGTVFVELASFVSAGI

TLVVTSLLVIFFQYTYNQDHSKNPLSSEKSKSFFYLFFPHDCSLPYR*LY

LYLLEAISKRKCAFI*RCSCYLYVSCPFIKPLYLYPQQVKQAFKDTLREI

FIVFKK*RNNLK

>LoafORs78.1P

GHSNNVTDFVLLGLSQDPKGQKALFVMFLLIYIVTMVGNLLIVMTAIVSP

SLDSP/HVFLCCLSLMDAVLSTAVSPKMIVDLLCDKKTISFPAFMGQLFI

EYLFGGVEVFLLEAMAYDRYVAICKPLHYLIVMNRHVCILLLVVAWGGGF

LHSVVQLLFVYSLPFCGPNVIDHFSCDMYPLLELACSDTYFIGLTVVANG

GAICMVIFILLLISYGVILSSLKTHSQKGWSKALSTCSSHITVVVLFFVP

SIFLYVRPVSNFPVDKSMTAVFTVITPMLNPLIYSLRNSEMKNAMEKIWN

RKLTTGILRICFHTENIIANAKARNRK*IITM

>LoafORs78.2P

FFFLAYLSFI*TAYSTSIAPKMIVDMLY*EKKKFISFHAYMAQGFIDHLF

ASAEVIFLVVMAND*YVAICKPLHYLMDMCSHADDSLDWRFSTLWFNSLY

QPPFCGPKVNDSFVCDMYSLLKLACMNRC/WKRDNCAAHMTVVILFFIFC

VFLYARPTSPFPWIYS*LWF*LS*PLC*TI*SICTLRNSEMKNAVRKLCS

KKVTL

>LoafORs79.1

MEAITCNGSDNASPVFYLVGIPSLPESLFLPVFLIFLLIYLLILVGNILI

LLAVVAEPSLHKPMYFFLINLSALDILSTTTTVPKMLSLFLLGDQILSFP

ACFLQMYLFHGLNCSEAFILVVMAYDRYVAICRPLNYHVHMTPQTNAALA

ASAWLTALLLPIPAVVQTSQMAFGPVAHVYHCFCDHLAVVQSSCSDTTPQ

AFLGFRIAMVVSFLPLLLVLLSYAHILASVLHISSREGRSKAFSICSSHL

LVVGTYYSSIAIAYMAYRADLPLDFHIMGNVVFAILTPVLNPLIYTLRNK

DVKAAITKMACLQDPRCSRALNS*

>LoafORs79.2

MKATACNGSENFSPTFYPVGIPSLQEFLFLPVFFIFPLFYLLILVGNTLI

LAAVVVESSLHKPMYFFLINLSALDILFTTSTVPKMLSLLLLGDRFLSFP

ACFLQMYLFHSFSCSEAFILVVMAYDRYVAICHPLHYPVHMTPQTNTALA

ASAWLTAFLLPIPAVVQTSQMAFDSTVRIYNCFCDHLAVVQASCSDTNPQ

TFMGFCIAMVVSFLPLLLVLLSYAHILASVLRISSREGRSKAFSTCGSHL

LVVGTYYSSIAVAYVAYRADLSLDFHIMGNVVFAILTPVLNPLIYTLRNK

DVKAAISKMACTQDPWRSWALDP*

>LoafORs79.3

MEATICNGSVDASPVFYLVGIPFLPESLFLLVFFIFLLFYLLIVMGNALI

LVAVVAEPSLHKPMYFFLLNLSVLDILFTTTTVPKMLSLFLLGDHFLSFP

SCLVQMFLFQSFTCSEAFILVVMAYDRYVAICRPLHYPVHMTPQTNAALA

ASAWLTALLLPIPAVVKTSQMAYDNIAYIYHCFCDHLALVQASCSDTTPQ

TLMGFCIAMVVSFLPLLLVLLSYAHILASVLCINSREGRSKAFSTCSSHL

LVVGTYYSSIAIAYMAYRADLPLDFHIMGNVAYAILTPMLNPLIYTLRNK

DVKAAVTKIARLKTQAVIGALGFRCS*

>LoafORs79.4

METITCNGSVDSLPIFYLLGIPSLPKSLFLPIFFVFLLLYLLVLVGNALI

LVAVVAEPSLHKPMYFFLINLSTLDILFTTTTVPKMLSLLLLGDHFLSFS

ACFLQMYLFHSFSCSEAFILVVMAYDRYVAICRPLHYPVHMTPQTNAALA

ASAWLTALLLPIPAVVQTSQMDFDNIAHIYHCFCDHLAVVQASCSDTTSQ

TFIGFCIAMVVSFLPLLLVLLSYAHILASVLHINSHEGRSKAFSTCSSHL

LVVGTYYSSVAIAYMAYRAELPLDFHIMGNMVYAILTPVLNPLIYTLRNK

DVKAAITKMAYAQDSNHPGKP*

>LoafORs79.5P

MGENGNTSTFNLSYTNFFLVGFPGLREWRPLLVLPLTSLYVTIISANALV

IYTVATQQSLHQPMYILITLLLAVNICAATAVMPKMLEGFVHYANLISLH

GCLAQMFFIYFTLLLDYNLLLAMALDRYLAICHPLRYTDLMTSRLLGPLA

ILALTWSLGVAVPLVVLTSQARFCWTAVIQHFTCDYTALLSIACGDLTIN

NRLG/QVGLAMRLVTVIFDLALLGTSYTRIIYAAFRISSGGVRAKALHTC

GSHLLVILTIYLSGLCSSVVFRVAKTVSQDVQNLISAIYLLLPGALNPII

YGVRTREIWQHVKKMLCGTES

>LoafORs79.6

MSGWSNGSSNVSYTSFLLLGFPGLQESHAFLVLPFLSLYLLIVSANALII

HTVATQQSLHQPMYTLIALLLAVNVCAATTVVPTMLFSFSTHFNRISLPR

CLFQMFCIYFLIVFDCNILLVMAVDRYVAICYPLCYPEIITTPLLTGLVG

VAAARSTCIVAPVVGLASRVHFCRSDVIHHFACEHMALMKLSCGDISLNK

TVGLTVRIFNRVLDMVLLGASYSRIIHAAFRISSGGARSKALNTCSSHLL

VIFTVYSSTMSSSIVYRVAHTASQDVHNLLSAFYLLLPCLVNPIIYGVRT

KEIRQHLGTLFQRAQLQVPTEKPQNLLSRKKFPA*

>LoafORs79.7

MSVWSNRSSNMSYTSFLLVGFPGLQESRTLLVLPFLSLYLMIISINALII

HTVAAQKSLHQPMYALIALLLAVNICTATTVVPTMLFSFSTRFNHISLTH

CLIQMFCIYFLIIFDCNILLVMALDRYVAICYPLRYTETVTSQLLAGLVG

VAAAWSTCSVTPVVFLASQVHFCYSDVIHHFACEHMALMKLSCGDISLNK

TVGLTVRIFNRVLDTFLLGASYSRIIRAAFRISSGRARSKAFNTCGSHLL

VIFTVYFFTMTSSIVYRMVRTASQDVHNLLSALYLLLPCLINPIIYGART

KEISQHLVRLFQRTGV*

>LoafORs79.8P

GFPRPAGVPHLLVLPFLSLYLVIISANALVIYTVAAQQRLHQPMYALIAL

LLAVNICAATTVVPAMVFSFSTHFIRISLPRCLFQMFCIYFLVAFDCSIL

LFMALDRYVAI*CPLRYPEIITTPLLTGLVGVAAARSTCIVAPVVGLASR

VHFCRSDVIYHFACEHMALMKLSCGDISLNKTVGLTVRIFNRVLDMVLLG

ASYSRIIHAAFRISSAGARSKALNTCSSHLLVIFTVYSSTMSSSIVYHVA

HTTSQDVHNLLRAFYLLLPCLVNPIIYGAKTKEIRQHLARLFLRA

>LoafORs79.9

MATLNHTGMSHTVFSLLGIPGLENQHVWISIPFVISYVIALLGNSLLIFI

ILTRCSLHEPMYFFLCMLSGADIVLSTCIVPQALAIFWSHIGEISLDCCI

AQVFFLSSTFISESGILLMMAFDRYIAICYPLRYTAILTHALIGKIGVSI

FLRSNGTMFPIIFLLKRLTFCKSNTLPNTACKHIVLARISCDDIRVNIWY

GFFVLMSTLVLDVTLIFVSYVLILRAVFHMPSQDTRHKALNTCGAHVCVI

ILFYGPGIFSALTQRFGGHISPYIHVLLPNVYILVPPMLNPIIYGIKTKQ

IRDQVVHLFLTKHT*

>LoafORs79.10T

RYSCDDIRVNIWYGFFVLMSTVVLDVMLIFISYVLILRSVFHIPSKDARH

KALNTSGSHVCVIILFYGPGIFSVLTERFGLHILPHIHVLLANVCILAPP

MLNPIIYGIKTKQIRDQITHVLFPKVIWLSE*

>LoafORs79.11

MTLVVSPDMNILNRTGVSYTVFHLLGIPGLEDQHMWISIPFFVSYVIALL

GNSLLIFIILTRRSLHEPMYLFLCMLAGADVVLSTCTVPQALAIFWFRAG

EISLDRCITQFFIIHCTFISESGILLVMAFDRYIAICYPLKYTTILTHAL

IAKIGGTIFLRSYGTIFPIVFLLKRLTFCQNNIIPHTFCEHIGLAKYACN

DIRVNIWYGLFVIVSTVVLDVLLIFVSYVLILCAVFCMPSQDARHKALNT

CGSHVCIIILFYGPAIFTTLTQRFGRYIPPHVHILLANVCILVPPMLNPV

IYGIKTKQIREQVAYIFFPKQK*

>LoafORs79.12T

MTTLNHTGVSHAVFRLLGIPGLEDQHVWISIPFVISYIIALLGNSLLIFI

ILTRRSLHEPMYLFLCMLAGADIVLSTSTVPQALAIFWFSAGEISLNRCI

TQLFLIHSTFISESGILLVMAFDRYIAICYPLRYITILTHSLIAKIGGTI

FLRSYGT

>LoafORs79.13P

ECCITSSYFIHSPSSLSQGSGLVMACDGYIAICYPTEIHNYLTHSLIAKI

RRDNLLRSYGTIFPIIFLLRR/FPHNISSEKMTFCKSNILPNTGCKHIVL

AQVSCDNIQVNIWYVF/FFVLMSTVVLDIVLIFISYLLILHAVFRIPSQG

ARHKALNICGSHVCVIILFYGPGIFTTLTQRFGHHIAPHIHVLLANISIL

APPMLNPIIYGIKTKQIRDQVVHVLSTK

>LoafORs79.14P

MTTLNHTGVSYTIFYLLGIPSLEDQHVWIS/FFVSYVITLLQNSLLILII

LRKHSLHRPMYFFLCILARADIVLSTGIVAQALPIF*FSAGEISLDCCII

KLFCIPSTFISESGISVAVVFDCNITICFPLRYNTILTHALIGKIGVTVF

LRSYGTVFSVIFLLNRLTFCKSNILPNTACK/KHCL*AKISHDDI*VNIW

YGLFVLISTLVLDIVLIFVSYMLALCTVFCISSKDVHHKPLNICGSHVCV

IILFYGPGNFSVLTQQYGHYISLHIHVLPANVYILVPSMLNPITYRIKTR

QIQDLIFNVLFAK

>LoafORs79.15P

MATLNHTGASHTVFRLLGIPGLEDQHMWISIPFFISYVIALLGNTLLIFI

ILTRRSLHEPMYLFLCMLSRADVVLSTCTVPQALVIFWFSAGEISLGHCI

TQLLFIHSTFISESGILLVMAFDRYIAICYPLRYTAILTNCLIGKIGLTI

FVRSYGTIFPIIFL*K/FPHNISLKRLTFCRNNILPHTGCEHIGLARYSC

DDIHVNIWYGFFVLMSTVVLDVMLIFISYVLILQSVFHIPSKDARHKALN

TCGSCVCVIILFYGSGIFSVLTEWFGHHLLPHIHVLLASVCILAPPMLNA

IIYGIKTK*IQDQVTRV

>LoafORs79.16P

IISYLIAVLGNSLLIFIIVSRRSLHEPMYLFLYMLAGADVVLSTCTVPQA

LAIFWFHAGEISLDRCITHLFFIYSTFISESRILLMMAFVRYIAICYPLR

YTTILTHALVGKIGAGIFLRSYGTISPMTYLLKRFTFCQNNIIPHTFCEH

IGFAKYACNDIQVNIWYGFSVLMLTVVLDVLLICVSYMLILRAFFHMPSQ

NAHHKALNTCGSHVCVIILFYGPGISTTLTQCFGCHIPPHTHILLANVCI

LVPPMLNPIICGIKTKQIQDQMVHVLFIRQK

>LoafORs79.17

MNILNHTGTSHRIFRLLGIPGLEDQHMWNSIPFIISYLIAVLGNSLFIFI

ILTRHSLHEPMYLFLCMLAGADVVLSTCTVPQALAIFWFHAGEISLDRCI

THLFFIYSTFISESGILLTMAFDRYIAICYPLRYTTILTHALVGKIGSSI

FLRSYGTISPMTYLLKRLTFCQNNIIPHTFCEHIGLTKYACNDIRVNIWY

GFSVLMLTVVLDVVLICVSYMLILRAFFHMPSQNAHHKALNTRGSHVFVI

ILLYGPRIFTTLTQRFGCHIPPHTHILLANVCILVPPMLNPIIYGIKTKQ

IQDQMVHVLFTRQK*

>LoafORs79.18P

MSASNMTSTHPSAFLLMGIPGLEHLHIWISIPFCSAYTLALLGNCTLLFI

IRSDAALHEPMYLFLATLAAIDLVLSSTTLPKMLAIFWFRDRKINFYACL

VQMFFLHSFAIMESAVLLAMAFDRYMAICKPLHYTMVLTGHLIT/RIVMA

AVLRAVTLMTPLPFLLKFFHYCQGPVIAHCYCEHMAAVRLACGDTRFNNI

YGIAVAMFIVVLDLLFVILSYIFILWAVLQLASQEARCKAFGTCVSHIGA

ILAFYTPVVISSVMHRVARRAPPHVHILLANFYLLFPPMVNPIIYGVKTK

QIREQVIGLFLRKDV

>LoafORs79.19P

IAMFLCNASTFAHPTFLLTGFPGLKAFHHWVSIPINLTCVVSILGNSIIL

FLIHTDPALHEPMYIFLFMLAASDLGLCASTFPTMVRLFWLGARELPFDF

CVAQMFFIHAFTFVESGVLLAMAFDRIIAIRNPLHYATILTHSAMVKVGA

AILVRAVLLNLPGPILLRRLLFPQISILSHCYCLHCDLVGLACSNTWVNS

LVGLVSILLSLGLDSSLIMLSYALILQTVLGIASPGERLKALNTCVSHLC

IVLIFYLPKLGLSVLHRVEKHSYPA/LAVLMANLHFVVLPFMNAIVYCIK

SKQICQGLLKRFQQKRVDVS

>LoafORs81.1P

NLLIILATVSDSHLHTPMYFFLSNLSFVHICFTTTTIPKVLANTQTQRKS

ISYTGCCTRICFVLTFAGLENGILVMMAYDRFVAICHPLKCTAIMSPTLC

ELLVLLSFLIGVLDA/LHTLMALRLSFCTDLEIPHFFCELAHVLELACSD

ILISNILVYVVTSLLGVVPLFGIVFFF

>LoafORs83.1

MLGNYSSTTEFYLLGFPGSQELHHVLFATFLFLYSVALMGNSVIIMIVCV

DKRLQSPMYFFLSHLAVLEILTTSIVVPVMLWGLLLPGMQTISLTACVAQ

LFLYLALGTTEFSLMGVMAVDRYVAVCNPLRYNIIMNSCTCTWVVIVSWV

FGFLLQIWPVYPTFQFTFCKPNMVNNFFCDRGQLLKLSCDDTLFTEFIFF

LMAVFIIVGSLIPTIISYTCIISTILKIPLASGRRKAFSTCASHFTFVVI

GYGTCFFLYVKPKQTQASEYNRVVSLMVAVVTPFLNPFIFTFRNDKVVEV

LRDGVKHCCHLFRNQPCPRAAL*

>LoafORs83.2P

MLENYSSATEFYLLGFSGSQEHRHILFATFLFLYSVTVMGNSVIIVIVLI

/CADKHLKSPMYFFLSHLSFLEILVTSIAVPVMLRGLVLPGMQTISLTVC

VAQLYLYLSLGTSEFALLGAMAVDRYVAVCNPLRYNIIMNSRTCTWVVIL

SWVFGFVFQIWPIYATFQLSFCKSNVLDHF

>LoafORs91.1

MGENQTSVTEFILLGFPLGLRVQLLLFGLFSLFYTFTLLVNGAILGVISL

DPRWHTPMYFFLSHLAIVDIAYACNTVPQMLVNLLSPTMPISFPGCLTQT

FLFLTFAHTECLLLVVMSYDRYVAICHPLRYSAILSWRLCITLAITSWAC

GSLVVLVHVSLILRLPFCGPHEINHFFCELLSVLRLACADTWLNQVVILA

ASLLVLVGPFCLVLVSYTHIFFAVLKIQSREGRRKAFSTCFSHLCVVGLF

FGSALVIYMTPKSSHPEEQQKVLFLFHSIFNPMLNPLIYSLRGTELKSAL

RRALCKESHCQLG*

>LoafORs91.2

MGESQTSVTEFILLGFRLGPMMQLLLFGIFFLFYTLTPLGNRAILGLIYL

DSRLHTPMYFFLSHPAIVNMSCACNTVPQMLVNLLSPITPISFAGCLTQT

FVFMTFAHKECLLLVAMSYDHYVAICHPLRYSAIMSWRLCITLAIPSWAC

GSLLALVHVILILRLPFCGPQEINHFFCEILSVLRLACVDTGFNQVVIFA

SCVFILVGPLCMVLVSYTYILFAILRIQSGEGPTKAFTTCSSHLCVVGLF

FGCAIVMYMAPKSSNPEEQQKILFLFYGLFNPMLNPLIYSLRNAEVKSAL

RRALCKESHSQSG*

>LoafORs91.3P

MGENQTSVTEFILLGFRLGPMKQLLLFGIFSVFYTFTFWGTG/LLGNGAI

LGLILLNPRLDTPMYFFLSHLAVVDMSYACNTVPQMLVNLLSPTTPISFA

GCITQTFLFMTFGHTECLLLVAMSYDRYVAICHPLRYSAIMSQRFCITLA

VTSWACGSLLALVHVVLLLRLPFCGPQDINHFFCEILSILRLACADTSLN

HVVIFAACVFILVGPFCLVLVSYTHILFAILKIKSGGGRRKAFSTCSSHL

GVVGLFFGSAIVTYMTPKSSHPEEQQKVLFLFYSVFNPMLNPLIYSLRST

EVKGALQRALCKGSQTR

>LoafORs91.4

MGENQTSVTEFILLGFRLGPMMQLLQFGIFSMFYAFTLLGNGAILGLISL

NLRLYTPMYFFLSHLAIVDIAYACNTVPQMLVNLLSPTMPISFAGCLTQT

FLFMAFAHTECLLLVVMSYDRYVAICHPLRYSAIMSWRLCITLAVTSWAY

GSLLALVHVVLLLRLPFCGPHEINQLFCEILSVLRLACGDTRLNLMVIFA

DCVFVLVGALCLVLVFYTCILFAILRIQSREGRKKTFFTCSSHLCVVGLF

FGSAIVTYMAPKSSHPEEKQKVLFLFYSIFNPMLNPLLYSLRNTEVKGAL

QRALCKESHSQ*

>LoafORs91.5

MGGNQTSVTEFILLGFCLGPRMQLLLFRIFSLFYTFTLLGNGTILGLIFL

DPRLHTPMYFFLSHLAVVDIAYTCNTVPQMLVNLLSPTTPISFAGCITQT

FFFLTFALTECLLLVVMSYDRYVAICHPLRYSAIMSWKLCITLAVTSWSC

GSFLAVVHVSLILRLPFCGPHEINHFFCEILSVLKLACADTWLNQVVIFV

ASIFTLVGPLCLVLVSYTCILFAILKIQSRKGRRKAFSTCSSHLFVVGLF

FGSAIVMYMAPKSRHPEEQQKVLFLFYSIFNPMLNPLIYSLRNAEMKSAL

WRALCKESHFRFR*

>LoafORs91.6

MGDNMTTVTEFILLGFPLGLRVQMLLFGLFSLFYAFTLLGNGAILGLISL

DPRLHTPMYFFLSHLAIVDIAYACNTVPQMLVNLLSPTSPISFAGCVTQT

FLFLTFAHTECFLLVVMSYDRYVAICHPLRYSAIMSWRPSLTLAVTSWIL

GALLALVHLVLLLPLPFCGPQRVNHFFCEIIAVLKLACADTHINKITVLA

GAASVLVGPFSSVVISYIHILCAILKIQSGEGRQKAFSTCSSHLCVVGLF

YGTAIIMYVGPRYGNPKEQKKYLLLFHSLFNPMLNPLIYSLRNKEVKNAL

KKVLGKERAS*

>LoafORs91.7P

KGNKTWVTSFILSGLQLHTEMEVFLFWIVSLFYAFSLLRNRMILGLFRLD

PRLHNSMYFFLAHLAVIDKAFASNNIPKMLANPGEHEKTISFVSCIMQKF

LFFVFAATE*LGDDVL**YVAICHALHSTVIMS*RVCTVLAITSWTCGFI

VA/LVNVIIFLRLPFCGAQEVNRLFCEVLSVLKLACADT*IDEVINFAAC

IFVFVGPLCLVVVFYTHILWAFPRIQSREGLRKAFFTCLSHIYMGGLFVG

IAMMVCLVPDSSQLQEQQKILSILWSCY

>LoafORs91.8

MGGNQSRISEVTLLGFQVDPALEYFLFGLFFLFYTFTLLGNGAILGLICL

DSRLHTPMYFFLSHLAVVDMSYASNNVPKMLVNLLSKKRTVFFVPCIMQT

FLCLALAHTECLILVVMSYDRYVAICHPLHYTVFINWRVCITLSVATWAY

SFLLALVHVVLILRLPFCGPHEINHFFCEILSVLRLACADTWLNQLVIFA

ACVFILVGPFCLVLVSYIRILFAILRIQSGEGQRKAFSTCSSHICVVGLF

FGSAIVMYMVPKSSHPEEQQKVLSLFYSLFNPMLNPLIYSLRNTEVKSAL

WRALCKERRM*

>LoafORs91.9

MGSNQSWVTEFILVGFQLPADTELFLFWVFSLLYIFSLLTNGMILGLICL

DIKLHSPMYFFLSHLSVIDISYASNNVPKMLANLANQKRTISFGPCVIQV

FLYLTFAATECLILVVMSYDRYVAICHPLRYTVIMNWRVCTVLAIASWAC

GFILAIVHAILLLRLPFCGPLKVNHLFCEILSVLKLACADTWINQVVILA

ASVFVLVGPLFFMLVSYMRIICTILKIRSREGRRKAFSTCSSHLCVVGLF

FGIAMVVYMVPDSKQREEQEKMLSLFHSLFNPMLNPLIYSLRNAQVKDAF

YKALQRKRAR*

>LoafORs91.10

MRGNQTRVTEFILLGLQLHAEMEVFLFWIFSLFYAFSLLANGMILGLIWL

DSRLHTPMYFFLSHLAVIDISYASNSVPKMLANLGNQKKLISFTPCIMQT

FLYLNFAHTECLILVVMSYDRYVAICHPLQYTVIMSWRVCTALAVASWAF

GFVVALVHVILLLRLPFSGPQGVNHLFCEILSVLKLACADTWINEVVIFA

ACVFLLVGPLCLMLVSYTHILLAILRIQSGEGRRKAFSTCSSHLCVVGFF

FGIAMVVYMAPDSNQREEQQKILSLFYGLFNPLLNPLIYSLRNAQVKSAF

YRALQKQRA*

>LoafORs91.11

MGGNQTWISEITLLGFQVEPALEYSLFGLFSLFYVFTLLGNGTILGLICL

DPRLHTPMYFFLSHLAFIDISYASNNVPKMLANLLSKKRTILFIPCIMQV

FLYLALAATECLILMVMSYDRYVAICHPLHYTVIMSWQVCITLAITTWAL

NFLLALVHVVLILRLPFCGPHKINHFFCEILSVLRLACADTRLNQVVIFA

TCVFVLVGPLCLVLVSYICILLAILRIQSGEGRRKAFSTCSSHLCVVGLF

FGSAIVMYMAPKSHHPEEQQKVLSLFYSLFNPMLNPLIYSLRNTEVKGAL

WRALCKERPM*

>LoafORs91.12

MGGNQTWISEVTLLGFQVDPALEYFLFGLFSLLYIFTLLGNGTILGIICL

DPRLHTPMYFFLSHLAFIDMSYASNNVPKMLANLLNKKRTILFVPCIMQV

FLYLALAATECLILVVMAYDRYVAICHPLHYSAIMSWRLCITLAVTSWVC

GSVQALTQVSLILRLPFCGPHEINHFFCEILSVLSLACADTWLNQLVIFA

ACVFILLGPLCLMLVSYTCILFAILRIQSREGRRKAFFTCSSHLCVVGLF

FGSAVVLYMAPKSSHPEEQQKVLSLFYSLFNPMLNPLIYSLRNTEVKGAL

WRALCKERRM*

>LoafORs91.13P

MGSNKTWLTEVTLLGFQVDPALEVFLFGLFLLFYGLTLVGNGTILGLVWL

DPRLHSPMYFFLTHLAIVDMSYASSTVPKMLANIVMQKKTITFGPCILQT

FLYLAFAVTECMVLVVMSYDRYVAICHPLLYTMIMSWRVCTGLAAACWVF

SFLLALVHITLILRLPFCGPQTINHFFCQIMSVFKLACADTRLNQVVLFA

GSVCVLVGP/CLVLVSYTRILFAILRIQSGEGRRKAFSTCSSHLCVVGLF

FGSAITMYMAPKSSHSQEQRKILSLFYSLFNPMLNPLIYSLRNAEVKGAL

WRALWKQRSL

>LoafORs91.14

MGENQTSITEFILLGFPLTPRVQLLLFGLFSLSYAFTLLGNGAILGLICL

DPRLHTPMYFFLSHLAVVDMSYACNTVPQMLVNLLSPTSPISFAGCITQT

FLFLTFAHTECFLLVVMSYDRYVAICHPLRYSAIMSWRPSLTLAVTSWIL

GALLALVHLVLLLPLPFCGPQRVNHFFCEIIAVFKLACADTHINEIMVLA

GAVSVLVGPFSSVVISYIHILCAILKIQSGEGRQKAFSTCSSHLCVVGLF

YGTAIIMYVGPRYGNPKEHKKYLLLFHSLFNPMLNPLIYSLRNKEVKAAL

KRVFEKERTS*

>LoafORs91.15

MTENQTSITEFILLGFPVGLRVRMLLFGLFSLFYAFTLLGNGAILGLICL

DPQLHTPMYFFLSHLAIVDMSYASNNVPKMLANLLSKKRTIFFAPCILQT

FLYMAFAHTECLILVVMSYDRYVAICHPLHYTVIMSWTACTVQVIASWAC

GSLLALVHVVLLLRLPFCGPHEINHFFCELLSVLKLACEDTRLNHVVIFA

ASVFILVGPLCLVLVSYTRILFAILRIQSGEGRRKAFSTCSSHLCVVGLF

FGSAIVMYMAPKSSHPEEQQKVLSLFYSLFNPMLNPLIYSLRNTEVKGTL

WRVLWKQGSV*

>LoafORs91.16

MEVENQTGVTKFILVGFPGTCGMRASVFLMFLLAYVLTMAENMVIILLVQ

QNRPLHKPMYFFLANLSFLETWYISVTVPKLLVSFWSVSNSIPFTHCMIQ

LYFFIALMCTECVLLAAMAYDRYVAICCPLHYPTMMSHRLCARLALGSWA

TGFGISLAKTYFISRLSFCGPNVINHFFCDISPVLNLSCTDMSMAELVDF

LLALVIFLFPLTITVLSYGCILATVLRMPMGKQKAFSTCASHLVVVTIFY

SATIFMYARPRAIHAFNMNKVISIFYAIVTPALNPFIYCLRNREVKEALR

KLAYC*

>LoafORs91.17

MSEFFLLGLSSDWGTQVSLFVLFLAMYLVTILGNVLILLLIRLDSRLHTP

MYFFLSVLSFVDLCYSNSIAPQLLAHLLSAHKSIPFHRCVFQLYTSLAFG

GSEFFLLGAMAYDRYMAVCHPLHYTVIMHGWLCLGLATGCLAAGFMNSLM

EAIITFRLPLCHNIINHFACETLAVLRLSCVDISFNKVMVAVSGFLVIML

PCFLVLFSYARIVAAILRIRSAPGRSKVFGTCTSHLTVVSMCFGATIFTY

LGPRSASSVEGEKMVALFYAVVTPMLNPLIYSLRNKEVMAALRKVLEKLR

DKG*

>LoafORs91.18P

MSEFFLLGLSSDWGTQVSLFVLFLAMYLVTVLGNSLIILLIRLDSRLHTP

MYFFLSVLSFVDICYTNSTVPQMLVHFLSDCKSIPFHSCMLQLYTSLAMG

STEFFLLGAMAYDRYVAVCHPLHYMVIMHEGLCLVLASGCLVAGFANSLL

QTILIFKLPFCHNVINHFACEMLAMLRLTCVDISFNKVMVAISGFLVIML

PCFLVLFSYTGIVAAILLIRSAQGRRKAFGTCASHLTVVSMCFGDGPSLP

TMGPEPGLPGKTREKNVPLFLA

>LoafORs91.19P

MNEFFLLGLSSDWGTQVSLFVLFLAMYLVTVLGNSLIILLIRLDSRLHTP

MYFFLSVLSFVDICYTNSTVPQMPVHFLSNRKSIPFHSCMLQLYTSLAMG

STEFFLLGAMAYDRYVAVCHPLSYMVIMHRGPCLGLTSSCLVAGFANSSM

QTILIFKLPFCHNVVNHFACEMLVVLRLICVDISFNKVMVAISGFLVIML

PFFLVLFSYARTVVTILHIHSMHGCHKAFST/SHLTVVSVCFGTAIFTYM

RPEADSLAEQEKMVALLYAVMTPMLNPLIYSLRNKEVMSALRRVLGK

>LoafORs91.20P

FILLGLSSDRGTQVSPFVLFFIMYLVTVLGNFLIVLLIKLDS*LHMSTCF

FLTKLSLVDISYARSIVPQVLVHFPMEHKVITYLSCAAQLFFSLGFGGIE

FILLAVVAYDFYVIFGHHAERAMHKVGLLILGQWFHQLSLAYCHHL*ASH

VHKQAY*SHIL*LLAMLRLACVDISSKEVAVLISDFVLPMISYCLALLSY

IQIISIILKIQSAKGRRKVFHTCASYLTVVVLCYGMAIFTYVQTYSS/LF

GAILTPMLNSMIHSLRKKEVKGAWQKLLLQFSGLTSKLAT

>LoafORs91.21P

TSLMPQA*SLSYWCIF*RNLISYLRCAAQLFFSLGLGRIEFVLLTVMACD

CYVAVFDLPRYSTTMHGGLCARLSV*S*ASDSINSLLHTAFTFQLPTYSN

KLIDQISCELLAVLRLACVDTSSNEVTIMVSRIVLLMTPFCLVFLSYILI

ISTILKIKPTEGRRKAFHTRAAHLTLVALCCGMTIFTYIQPSSSLLVFEE

KVISL/SLFYAILTTTLNPMINSLRNKEMKGAWQKFFGQFSGLTSKLAT

>LoafORs91.22P

MN*PSHFLMGTNNQTWASEFILLSFSSDWGTQVSLFVLFLIMCLVKVLGN

FSTVLLIRLDNLLHPPMYYFLTSLSLVDISYATSIVSQLWVHFLIEHNLL

PEL/IIFYLNCAAQLLFSLGLGEIEFVLLTVMAYDCYMAVRGPPR*SAFM

HGGLCARLGSSSWISGSINSLLQTAVTFQLPTCSDKLIYHISCELLAVLR

LACVDMSSSGVAIMVSSTSQMVTPFYMVLVLHQDLLHHPKTPVHRGKEKI

LPHMCLSSHSGCLVLCH/LFSYIQPCSSPLVFREKMTSLFYAI*HPC*TP

LL

>LoafORs91.23P

ISKFFLLELSSAWGTQVFL/VLFLAIYLVTVVGNSLIICLIIPDSRLHTP

MYFFLSVLSLMDICYTNSTVPQMLIHFLSA/SIPFHR*LLQLYISLAMNA

TEFFLMEAKVYDC*VAMSHLLHYKFII**GLCLKLATCLLLAGFANSLMQ

IMIISE*PFCHNVINHFACEMLVVLRLTSVDISFNKVMVTVSGLLVIILP

CFLVLFYYTVIVAAILCIHSAQGYSKAFKTYASHLTVVSMCFRTAMFTYM

RPMAGSSV/EEEKMAVLFMLW*PLILNPLIYILRKKLAMSTL*RGLGKLG

EE

>LoafORs91.24

MKTNNQTWVSEFILLGLSSDWGTQVSLFALFLIMYLVTVLGNFLIVLLTR

LDSRLHTPMYFFLTNLSLVDISYATSIVPQLLVHFLTERKVISYLSCAAQ

LFFSLGLGGIEFVLLAVMAYDCYVAVCDPLRYSAIMHGRLCARLAISSWV

SGSINSLLQTVITFQLPICSNKVIDHISCELLAVLRLACVDTSSNEVAIM

VSSIVLLMTPFCLVLFSYIRIISTILKIQSTEGRRKAFHTCTSHLTVVAL

CYGVTIFTYIQPHSSPSVLQEKMISLFYAILTPMLNPMIYSLRNKDVKGA

WQKLLGQFSGLTSKLETC*

>LoafORs91.25

MGTNNQTWVSEFILLGLSSDWGTQVSLFVLFLVMYLVTVLGNFLIVLLIR

LDSRLHTPMYFFLTNLSLVDVSYATSIVPQLLVHFLTEHKVITYLSCAAQ

LFFSLALGGIEFVLLAVMAYDRYVAVCDPLRYSAIMHGRLCARLAISSWV

SGSINSLLQTAITFQLPRCPNKLIDHISCELLAVVRLACVDTSSNEVAIM

FSSMVLLMTPFCLVLLSYIRIISTILKMQSTEGRRKAFHTCASHLTVVAL

CYGMAIFTYIQPHSSPSALQEKMISLFYAILTPMLNPMIYSLRNKDVKGA

WQKLSGQISGLTSKPAT*

>LoafORs91.26

MNYPHIFSMGTNNRTWVSEFILLGLSSDWGTQVSLFVLFLVMYLVTVLGN

FLIVLLIKLDSRLHTPMYFFLTNLSLVDVSYATSIVPQLLVHFLTEHKVI

TYLSCAVQLFFSLTLGGIEFILLAVMAYDRYVAVCDPLRYSAIMHGRLCT

RLAVSSWVSGSINSLLHTAITFQLPMCSNKLIDHISCEILAVVRLACMDT

SSNKVAIMVSSIILLMTPFCLVLLSYFWIISTILKIQSTEGRRRAFHTCA

SHLTVVALCYGMAIFTYIQPHSSPSALQEKVISLFYAILTPMLNPMIYSL

RSKDVKGAWQKLLGQISGLP*

>LoafORs91.27P

FLLLGFSEFPRLRPTLFLLLLAAHLATVAGNLLILASVAAAPRRPPMLLF

LGQLSAIELGYTLVV/PRALADLAAPGPARGRPISLVACAMQMQLFVALG

GAECFLLAAMAYDRYVAICHPLRYPAVMTPALCARLALACGLGGLAVSLE

LVAGVFRLPFCGPRLLVHFFCDITALLHLACTRGYADELPLLGACLLLLL

LPAALILASYSALAAALRRLRVPGGRRKAAATCASHL/VTFLHYGCATFM

YVRPKASYAPRSDRTLALVYTSVTPLLYPLIYSLRNREVTTGLRR

>LoafORs94.1P

FGLFLSMYLTTVLGNLLIYL/AITLECSLHMPVNYYFSNLSFSDNRFTPA

DLSQMLLNIQMEKCCYLCRLHHTHVVFHSFGLLHYLLLTMMTYDWYVDIC

HTLHYKVIVNL*LVSMLRALPKSWTVLLFSVCAVIKIPHYFCELSEILSL

TCSNIFINNVTGVRGFFSLSGILFSYA*VVSPVLHISREGGKCL*RKTQS

SLGN*IMHYGPSM

>LoafORs96.1P

MGKHNLTVLNEFILTGITDLPELQAP/PRAAGSMFGLFLIIYVISVVGNL

DIIILTKIDSTLQTPMYFFLRHLAIADLGYSTTVGPKMLVNFFVDENTIS

YYFCATQLAFFILFINVELFILSAMSYDRYVA/ICNPLLYTVIMSQRLCL

LLVAILYLYSAFVSLLVTLKIFNLSFCGYNVISHFYCDTNPLISLLCPNT

YEIQLITLILASFALITSLLIALVSYLLVFVTILRMNSAVGRHKAFSTCG

SHLTVVVIFYGTLIFMYMQPKSNHSYDTDKVASIFYTLVIPMLNPLIYSL

RNKDVKYALHRAWKK/SMEKNIQHLFNSVMHHMVLMNYMMGF

>LoafORs96.2P

VTEFIILVLTRNPELQGVLFVIFLFIYLVSFLGNMLTVVAIIYNTTLHTP

MYVLLLALATMDIICTTRVIPKMLWTMLTSEKTVSYGGCMSQLFFFTWFL

GTEMVLFTTVAYDHYVAICFFLRYSTVVNHHMCVALFSIVMAIVVTDT*V

HMGLIL

>LoafORs96.3P

MGTDNETVSCWGLQSPRLFSYLFMLFLVMYIFTVTCDVVILMLVSTSHQP

HTTLYFFLSNLSFLKIWYTTAAVPKALAILLGRS*TISYLVLLLGCTEYF

LLAAMAYDHYLAICYPLHYGVIMSSLLSAQLTLSSWVCGFLAVAVSTALI

SGLSFCSSHAINHFFCDIAPWIVLACISTQAVELLAFVIIFCGYSKFLPH

HPGPLPLHH*HCPQDALGQQPEQSLLHVLLSCNCGTYLIQIFLHVRTSIK

DALDLTKPVTFLNIVVTPVLNSLIYMICNKEVRETLLKK*KRK

>LoafORs96.4P

MGTGNETISQEFLLLGFSGSQARQLSLFKLFLETYLLTVSCYVVVLMLVS

TSHQPHTPLYFFLSNLSLEIWYTTAAVPEALAILLERKQTISFTGCLLQM

YLVFLLGCMEYFLLAAMAYDRYLAICHPLHYGAITMVQLALGSWVCGFLV

IAVPTALITGLSFCGSHAINHFCDIAP*IDLACTSIQAVEPLAFVIAFVV

ILSSCFITLASYVFIISTILRIPSASGQNKAFSTCSSHLTIVLIKYGSTI

FFHVETSIKNALDLTKAVTFLNVVVTPVLNPFIYMLHKKKKQRR*TLLKK

WKGK

>LoafORs96.5

MPEKLANTTIIMEFLLVGFPDDWMLQRMYAALFFLIYLTALMGNLLIVTL

TTTDGRLHSPMYFFLKNLSLIDICYISVTVPKSIMNSLTKSHSISFLGCA

SQIFFFIFFAGTEYALLIVMSYDRYTAICHPLHYETTMNRGACVQMVTAS

WLCGCVYGSIHAAGTFSVNFCGPKIVHQFFCDIPSLLTLACPGEQILEYA

FIIASFSFAFLCFLFMIASYVHIFSAVLRIPSAQGKFRTVSTCMPHLTVV

VLFLFSGLVTYLGTNYKSTSSPNLLMSVLYSMLPPSLNPVIYSLRNEDMK

LALGKLLGGKMLPKT*

>LoafORs96.6P

MSWPNNQTSGSDFVLLDLYLGTHAPWVLFTFTVVLSLWPCLATPQIIFSG

GGESNIHSPVRSPPTKKKMKRNIFFFFMEDPPPCLS*KNKKPHLLHWLWC

SALLFMTWWQAECLLLAAMAYYHYMAIYHPLRYPIFMCPLICMLMVVGSW

LGALLNALIHVVYTLTLPYCTSGETHHFFCEILLKLVSVWKLLNMKKGLF

VSGIFLLPPISAMMVSYGRILSAVLRTGSSMGLMKTLATCSSHMTVVSLL

WG/LFYGGAIIKYLLSEFYDSPEQDVVVSVFRTILTPMLNPLICSLQNRN

FARALRKILK

>LoafORs96.7

MENANDTTGVNFILLGLFSDTQIHLFLFAMVLIIFITSLMGNALMIILIH

VDPRLHTPMYFLLSQLSLTDMMLVSTIVPKMAANYLTGTRSISPTGCGAQ

IFLFLTLGGGECFLLAAMSYDRYVAICHPLCYSILMSQRLCLLMTAGSWL

LGGVDGLMQAGATLSFPYCHSREINHFFCEAPSLVRLACADTTIFEFFMY

VCCILMLLIPLSLILASYSLILAAVLRMQSAAAQKKAFTTCSSHLAVVGL

FYGTLIFIYMRPKSYRSVGRDKVVSAFYTIFTPVLNPLIYSVRNKEVKGA

LRRWLEKHFMRY*

>LoafORs96.8P

VNTTEAQRKALSTCSSHLVVVLLFFGASICTYMLPRSCHTAEQDVMVPGF

/FYTIIIPVLNPLTGALRSVKPSGMRLRKVGNVKT

>LoafORs96.9

MDDTTWLSNHTGRSYFILLGLFSQSKHPTLLCVVIFVIFLMALTGNTTLI

LLILSNVHLHTPMYFFISQLSVMDVMYISVTVPKMLMDQVMGVKKISVPE

CGIQMFLYVTLGGSECFLLAAMAYDRYLAICYPLHYPVLMNYRICLFLAS

GCWFLGSVDGFVLTPITMTFPFCRPREIHHFFCEVPAIMKLSCSDTSLIE

RLMYLCCVLMLLIPVTVISSSYSFILLTIHRMNSAEGRKKAFTTCSSHMT

VVFLFYGAAIYSYMIPSSYHTPDKDLVVSFFYTILTPVLNPLIYSLRNKD

VTGALKKMLNVEPVFQRTIK*

>LoafORs96.10P

VNATEAQRKALSTCSSHLVVVLLFFGASICTYILPRSCHTAEQDMMVPGF

/FYTIIIPVLNPLIYSLWNNDVTGALGSVKPSGMRLRNVGNVKT

>LoafORs96.11

MNSTTWLANHTGGSDFILLGLFSQSKHPALLCVVIFVIFLMALTGNAILI

LLILSNAHLHTPMYFFISQLSVMDVMYIFVTVPKMLMDQVMGVKKISVPE

CGIQMFLYVTLAGSEFFLLAAMAYDRYLAVCHPLRYPVLMNYRICLFLAS

GCWFLGSVDGFMLTTITMTFPFCRSREIHHFFCEVPAIMKLSCSDTSLIE

RLMYLCCVLMLLIPVTVISSSYSFILLTIHRMNSAEGRKKAFTTCSSHMT

VVFLFYGATIYTYMIPNSYHTPEKDLVVSFFYTILTPVLNPLIYSLRNKD

VTGAVKKMLNVEPVFQRTIK*

>LoafORs96.12

MRSVNQTSSTDFILVGLFVSTKHAVLLYSLSFILFLMALTGNALLILLIH

RESCLHTPMYFFISQLSHMDLMYICVTIPKMLMDQVMGDNTISPLGCGVQ

MFFYLTLAGAEVFLLAAMAYDRYAAICRPLHYPLLMNQRVCWILVTGCWF

LGIIDGLLLTPITMSFPFCHSRKIMNFFCEAPALLKLSCSSIFLYKTLMY

LCCVLMLLIPVSIISASYGFILHLIHRMNSVEGRRKALTTCSSHMVVVLL

FFGASFYTYMLPRSYHTAEQDMIVSAFYTIITPVLNPLIYSLRNKDVTEA

LRSMMPLGMSVRKVGNVKT*

>LoafORs97.1P

MPQKRANIKEFLLMGFPEDWMLQKLYAALFFLIYLTALMGNLVTVTLTAI

DRRLQAPTHFFLKNLSLIDTRYISVTVPKSIMNSLTNSGSISFLGCASQV

FLVIFFGGTEFALLTVMSYDRYAAICHPLHYETIMNRGACVQIVAVSWLS

GCGYGSIHVAGTFSVNFCGPNVVHQFFCDIPSLLTLACSGEHILEHAFII

ASCCFAFICFILMVVSYVHIFSSVLSIPSTQGRYKTVSTCI/LFLSSGFI

AYLGSALESPSSVSLFMSVLYSLLPPTVNPVIYSLRNRNMKVALSKIFGG

EIASKM

>LoafORs97.2

MEFLLMGFPDDWMLQRLYAALFFLIYLTALTGNLLIVALTTIDLHLHAPM

FFFLKNLSLIDIGFISVTVPKSIMNSLTKSHSISFLGCASQIFLFLFFGS

TEYALLVVMSYDRYAAICHPLRYETIMNRGSCVQMVTVSWLSGFVYGSIH

VTGTFSVNFYGPNIVHQFFCDIPSLLTLACPGEQILEYAFIIASFSFAFL

CFLFMIVSYVHIFSAVLRIPSAQGRFKIVSTCMPHLTVMALFLFSGVVTY

LGTNYKPASSLNLFMSVLYSVLPPSLNPVIYSLRNRDMKAALGKLLGDKM

LLKM*

>LoafORs97.3

MNNFTSVPMFFLTGFSDVQEIQILHAVLFLLIYLAAVLGNVLIITLTSKD

HWLHIPMYFFLKNLSFLDLCLISITVPKSIANSLAHLNIISFLGCVSQVF

FFILSATTEVSLLTVMSYDRYVAICHPLRYEVLMSHGACVQMAASSWVSG

VLNAILHTASTFSIPVCGSPEVHQFFCDVPQLLSLACSYNTVELVVIGLS

LVLDFGCFVFIDISYIHIFSTILRIPSREGRSRAFSTCLPHLTVVTLFLF

SGVFAYLRPLPESPSPLDLLVSVFCTMVPPIMNPVIYSLRNKGMKMALKK

LLKSRHCPSN*

>LoafORs97.4P

HAILFLLIYMIALMGNTLIITFTFLDQCLSTPMYLFLKQLSHL/DFCFIS

VTVPKSVNNLLTHTTSISF/CIPQLFLVLYLAFSELVLLTVMVYDHY*AI

CHPLRYEAVMNRNFCMYLVVTSLLSAAVYTSIIFSLTFCSFFIQQFFCDV

PSL*RSHALPDILLKLSRLLPFFSWTWDALFP**CPKYIYIFLALLRIPS

AQGRSKAFSTHLLQLLVKTLFFSTGTMPYLMPKSHSPSILNLLLSVFYMV

VPPTLSCMIYSLRNKSIKNALRMVNFGKISLYFN

>LoafORs98.1T

TSLFLLLPFLGITASYGRVLLAVYHMCSKEGRKKAFTTCSTHLTVVTFYY

APFVYTYLRPRNVCSPAEDKILAVFYTILTPMLNPIIYSLRNKEVLGAMK

RLFGVFSSKKK*

>LoafORs100.1P

THKCKAFFFSFILLNLTFRLAMAIFSSSDLTHLSSLMYLFLSNRSFLNIY

YFNSSSPHMLAIG*LSF*LSSWPTTFSR*QAPPS*VSECLHPAAMAYMRA

VAICN/LHYPLIVTCGVYVGLVVSCWMTVGTCGRILMATMASLHCARNTF

DYFTCEIQTVLKLAFSDTSFSELLLMGISTLNPLLPFGFIFTSY/KAFSI

CDSHLALVIIFYGIAISMYLKFHSQGSQMKTNLLLPSLTSSCPCFKPSSI

ACKKDVKDALRK

>LoafORs100.2

MERLTLPLEFLSSVGPGNATMMVTEFIMLGFGDLKKLGPFLFLVLGIVYL

ATISGNLLLVVLVSTQQGLQTPMYFFLANLSCLEVCYTSNIAPRMLMDLL

RENKVISMVGCIIQLYFFGALGSTECYLLAVMSYDRYLAVCRPLHYPTLM

HGMMCVGLVIGSWVSGFTVAAAFQAAMVSSLTFCGDNEIDHFFCDLEPLQ

KLSCSDPHLVSLVCMSLTVLVTLAPFGLTLASYWRILSTVLHIPSMTGRQ

KAFSTCSSHLVVVTLFYGTLILVYAVPLAGQVPALNKTFSLLYTVVTPMF

NPLIYSLKNKNVKEALRKLRS*

>LoafORs100.3P

NLTTIKEFLLLGFGSLHRLQFFFLGIFLEIYVVTLLRNILILTVISFSHS

LQTPMYFFLSNFSFLEI*YTTSIAPKMLMTLLSSPEVLSFAGCVAQFCFF

GSMAVVECFLLAAMSYDRYLAICSP/QPLRYPALMNLHTCILLASGSWLD

GFLTPIVTV/QLPFCAAYEIDHFFCDLAPVLKLACSDPETVERTTCLLAS

FITVVPFPLTIVSYIHIVAAVFRIPSAAGKQWAFSTCSSHRIVVMLYYRT

LGTAYAIPTATQAADINKVFSLLYTVVTPMINPFVCSLQNKDVKAVRR

>LoafORs100.4P

EENMTQISEFILLGFGNLHGLQFFLFGIFLTTYVMTLMSNVVILTVVLAD

HSLHTPMYFFLGHFSFLEVGYTTTIEPMMLRTLLSAHEPVSFFACACQFY

FFAALVATECFFLAVMSYDHYIAICNPLHYTSIMDRWGCLQLADASWMDG

FLASVPSHGPHFSV/IFQLTFCATNEIDHFSCDLKPIMKLACADTQAAKM

TTFICTFLFAFGPFLLTLASYTQIISTILRIPSTTGKKRAFSTCSSHLTV

VSLYYGTLGIVYGFPSGPQYEDLLKSLSLLYTVLTPVLNPIIYTLRNKDV

KVALRKLL

>LoafORs100.5

MGAGNASMLSEFFLVGLTNDPQLQPILFALFLFVYAVTVVGNLGLLTLIV

VSPRLHTPMYFFLSNLSFLDFCYSSVTVPKMLMGFFSGYQAISFSGCVAQ

TSCFLIFAVTEFFLLASMAYDRYVAICNPLLYHIIMSPRLCLQLVAASYA

VGLMNMVLLTSTTFRLTFCHSHAITHYFCDIPPLLKLACSDTQILQLLLF

ACGGFNVSVSLTIVLVSYVCVFFAIIRIPSAQGKHKTFSTCASHLTAVSL

YYGTTVFMYLRPSSEYLLGRDRLVSVFYTVVIPMLNPMIYSLRNKDVKET

FWSVLEKASRFLSLPMPRVL*

>LoafORs100.6P

NLSMETDFILLGMTDNPQLGVLLFGIFLIVYIVTVLGNLGLMVLIRVSPH

LHTPMYFFLSNLSFLDVCFSSITIPKTLANLLSKLQAVSFLGCVTQMGLF

IVFASAECNLLATMAYDRYTAICHPLLYHVTMPRVRCLLLVTGCYLGGLV

NMVAVTTSITQLSFCQPHILSHFFCDIPPLLALACSDPWVTQILVAGCGG

FTLVTSIVVILVSYMSVLMTILGIPSASGKQKAFSTCASHLTAVVLYYGT

TMYSYLQPS*HESQAGNQVVSVFYTIVIPMLNPLIYSLRNQEVKVALWKI

LRQSP*SLTLCLINVI

>LoafORs100.7P

MAMDNATAMTEFLLIGISNYPEWRVTFFTLVLITYLSTLLGNGLIIFLVH

FDPHLHTPMYFFLSNLSFLDLCYGTVSMPQALVHCFSTHPYLSYL*RLTQ

MSVSLVLATAECLPLAIMAYDRVVAISNPLRYSVVMNGPVCAWLAAMSWG

ASLVLTAMLILSLRLRFCEANVINHFVCEILSLLKLACSDTSLNELMILI

TGIFTLLLPFGFVLLSYIQIAAAVLKIRTAQGRFKAFSTCGSHLTVVTIF

YGAAISMYMKPQSKSSPDQDKFISVFYGALTPMLNPLIYSLRNKDVKGAI

KKVMAKR

>LoafORs100.8P

NDSEVMEFTPVALCNHPKSQVAFYRTLIVAYLITLLGNSLIIVVVRFYGK

LHTPVYFFPKQTILP*YLLLQQFSTFFVVQWPKRLPHHLLYHLLCPDDHI

PLSGDDQVSPPCSQAYDRFVAISNPLCYTIIVNNQVCTQLAMVTWASAFL

LIIIPVIAFPAHFCGHNIINPFTCEVHALLKLVYSDTPVRLILGLFISIF

TLPVPFTFILISHTHIVVAMLRIGSAEARLKAFSACGSHLTVATKFYGAA

IYTYWKHQSKKVPGKGQSLLNIL*SCDPYVEPPYIHLEEQGCKKKCHK

>LoafORs100.9P

NDANVMKFILVGLSRQPAFQLLFFWPMLFIYSVTLVGYLLIIVIMHIDS*

FHTPMFFLCQLSFLDICYSTSSMPMILVNCWKDFPTVSYSGSLVQMTISL

YLGVMECFLLAVMVYNRFVAISKPLH*PLFMNINTCILMVTSAFLMAVIP

VLVTAIRFRDNNVVNHFTCDLQEIFKLACSHVLTKEILMFASGVLVLFLP

FESILFS*FHIVVAVLKI/EARPKAFSTCGSHFTVIIIYYATASFMYMNL

HSQSSQDEDKIISVLYVAVAPMLSPLLYTLRNKDVK

>LoafORs100.10P

NASEVTEFILVGFSQQPQIQVAFFLGLLFFYLVTMFGNSLIIFVVRWDSP

HTPMYFFLSNLSFLDIRYSTSWEPYVLTQYFRDFPTISYTNCYAQMTTSL

FLEMIECLLAFMAYDGFVAISNPLCYTVIMNNQVCIQLAMVTWASAFLLT

IIPVIAFPAHFCGHNIINYST*EVQALLKLDCSDTPVRLILGLFISIFTL

PVPFTFILISHARIVVAVLRIGSAEARLKAFSTSGSHLTVVTIFYGTAMY

LYMKPQSKESQEEDKLFLIFYGAVTPSFTP

>LoafORs104.1

MENQTAMVTEFILLGFPLSREVELLFLVLLLPTFLLTLLGNLLIISIVLS

YSRLHTPMYFFLCNLSILDILFTSVISPKVLANLVSGDKIISFAECITQC

YFYFFLGTVEFLLLTVMSYDRYAAICYPLRYSTIMRSPVCVGTVVFCWAG

GFLSVLFPTILISQLPFCGSNIINHFFCDSGPLLALACADTTVIELMDFM

LSSMVILCCIVLVAYSYTYIILTIVRIPSASGRKKAFNTCASHLTIVVIS

GGITVFIYVTPSQKEYLDINKIPSILSSVVAPFLNPFIYTLRNDTVLGVL

RDVWARV*

>LoafORs104.2P

MGNSTTVTEFVLLGLSDACELQMLLFLGFLLTYLLTLLGNLLIVVITLMD

RRLHTTMYYFLRNLAVLEISLTSVIFPRC*TIS*LEVRPSPSQDVSYSFP

YFSLGTTEFYLLVVMSFDRYVAICNPLRYATLMSKRVCVQLVLCSWMSGF

LLVIVPRSVAFQQPFCGPNIINHFFCDNFPILELIYADTSLIELLGFIVA

NISLLCTLSLTATCYGHIRHTILHIRSAQEHQKAPHYC

>LoafORs104.3P

MGNSTTVTEFVLLGLSDACDLQMLLFLGFLLTYLLTLLGNLLIVVITLMD

RRLHTAMYYFLHNLAVLEISLTSVIFPKMLNNILTGRKTISLPGCFLQSF

LYFFLGTTEFYLLAVMSFDRYVAICNPLRYATIMSKRVCVQLVLCSWMTG

FLLIIVPSSITIQQPFCGPNIINHFFCDNFPVLKLICADTSLIELLGFIV

ANFSLLGTLSVTATCYGHILYTILHIPSAKERQKAFSTCSSHITVVALVY

GSCIFMYVRWGKGGQEEDRNK

>LoafORs104.4

MGNSTTVTEFILLGLSDACDLQMLLFLGFLLTYLLTLLGNLLIVVITLMD

RRLHTAMYYFLHNLAVLEISLTSVIFPKMLNNILTGRKTISLPGCFLQSF

LYFFLGTTEFYLLAVMSFDRYVAICNPLRYATIMSKRVCVQLVLCSWMTG

FLLIIVPGSILFQQPFCGPNIINHFFCDNFPILELICADTSLIELLGFIA

ANFSLLGTLSVTATCYGHILHTILCITSAKERQKAFSTCSSHIIVVSLFY

GSCIFMYVRSGKGGQGEDRNKVVALLNTVVTPMVNPFIYTLRNKQVKQVL

REKVSKLLS*

>LoafORs104.5

MGNSTTVAEFVLLGLSDACELQMLLFLGFLLTYLLTLLGNLLIVVITLMD

RRLHTAMYYFLSNLAVLEIWFTSVIFPKMLNNVLTGRKTISLPGCFLQGF

LYFFLGTTEFYLLAVMSFDRYVAICNPLRYATIMSKRVCVQLVLCSWMTG

FLLIIVPSSITIQQPFCGPNIINHFFCDNFPILELICADTSLIEFLGFIA

ANFSLLGTLSVTATCYGHILHTILHIPSAKERQKAFSTCSSHIVVSFFYG

SCIFMYVRSGKGGQRENRSKVVALLNTVVTPMVNPFIYSLRNKQVKQVLR

EHVSKLLS*

>LoafORs104.6P

MGNSTTVAEFVLLGLSDACELQMLLFLGFLLTYLLTLLGNLLIVVITLMD

RCLHTALYYFLHNLAVLEIWLTSVIFPKVLDNILTGRKTISLPGCFLQGF

LYFFLGTT/QFYLLAVMFFDRYVAICNPSHYATIMSKRVCVQLVLCSWMT

GFLLITVPSSILFQQPFCGPNIINHFFCDSFPILELICANTSLIELLGFI

VANFSLLGTLSVTATCYGHILYTILHIPSAKERQKAFSTCSSHITVVALV

YGSCILMYVRSGKGGRGEDRNKVVALLNTVVTPMVNPFIYTLRNKQVKQV

LRGKVSKLLS

>LoafORs104.7

MGNSTTVAEFVLLGLSDACELQMLLFLGFLLTYLLTLLGNLLILVTTLMD

RCPHTAMYYLLCNFAVLEIWFTSVIFPKVLTNILTGYKTISLAGCFLQFF

FYFFLGTTEFLLLAVMSFDRYVAICNPLCYATIMRKKVYVPLVLCSWMAG

FLLIIVSSSITFQQPFCGPNIIHHFFCDSFPLLELICADTSLIELLGFIV

ANFSLLGTLSVTATCYGHILYTSLRIPSAKESQKAFSTCSSHIIVVSLFY

GSCIFVYIWSGKGGQRENRSKVVALLNTVVTPMVNPFIYTLRNKQVKQVL

REKVSKLLS*

>LoafORs108.1

MKQMNESFPKYFILMGFTKYPCLDLPLFFVLMTSYIFTWLGNITIILVSQ

LDSQLQSPMYFFLTNLSFLDLCFTTTTVPQMLFNLAASNKSITYIGCMVQ

AYVFHWLGCTECILLGIMALDRYVAVCKPLRYSVIMDHKLCLQLSNTAWL

FGLTNSLLQSTLTVLLPLCGNQVLDHFFCELPGLIKMACVDTTVNEITLA

VVATLLIMGPLFMILISYSYIARAVFQIPSVDGRLKAFNTCSSHLLVVSL

FYGPGIYIYMQPSENGPQDLAKFLTLFYCVITPMANPFIYTLRNKDVKGA

LRSLLRRAISSKRI*

>LoafORs108.2P

MKHMNESFPKDFILMGFTKYPWLDLPLFFVLMTSYIFTWLGNIAIILVSQ

L/TLLLFWSLNSQLQSPMYFFLTNLSFLDLCFTTTTVPQMLFNLAASNKS

ITYIGCMVQAYVFHWLGCTECILLGIMALDRYVAVCKPLRYSVIMDHKLC

LQLSNTAWLFGLTNSLLQSTLTVQLPLCGNQVLDHFFCELPGLIKMACVD

TTVNEITLAVVATLLSMGPLFMILISYSYIAQTVFRIPSVDGRLKAFSTC

SSHLLVVSLFYGPGIYIYMQPSGNGPQDLAKFLTLFYCVITPMANPFIYT

LRNKDVKGALRRLLRRAILSKRI

>LoafORs108.3

MEKENQTSVSKFLLLGFSNWPGHQAILFSLFLCLYLTGLLGNLLILMAIV

SDHRLHTPMYFFLANLSLVDLCLSSTTVPKMLLNIQTQTQSISYPACLAQ

MYFCMMFANMDNFLLTVMAYDRYVAICHPLHYSTIMTQSLCACLVAVPWV

IAIFNPLLHTLMMAHLHFCSDNVIHHFFCDSSSLFSLSCSDTSLNQLMVL

GMVGLIFVVPAGCILASYARIISSVMKVPSAQGKLKAFSTCGSHLALVIL

FYGAITGIYMSPSSNHSTEKDSAASVIFMVVAPVLNPFIYSLRNSELKGA

LKKALSQSIISQ*

>LoafORs108.4

MENGNQTSVSEFLLLCFSSWPGHQVLLFSLFLCLYLTGLLGNLLILMAIA

SDHHLHTPMYFFLANLSLVDLCLSSTTVPKMLLNIQTQTQSISYPACLAQ

MYFSIMFANMDNFLLTVMAYDRYVAICHPLLYSTIMTQSLCACLVAVSWV

IAIFNPLLHTLMMAHLHFCSDNVIHHFFCDINSLLCLACSDTSLNQLMVL

AVVGLIFVVPSGCILATYAHIISAVMKIPSAQGKLKAFSTCGSHLALVIF

FYEAITGIYMSPSSNHSTEKDSAASVIVMVVIPVVNPFIYSLRNSELKGA

LKKTLSQSKILSQ*

>LoafORs108.5

MEKGNQTNVSEFLLLGFSNWPRQQALFFALFLCLYLTGLLGNLLILMAIA

SDHLLHTPMYFFLANLSLVDLCLSSTTVPKMLQNIQTQTQSISYSTCLAQ

MYFSIMFTNMDNFLLTVMAYDRYVAICHPLHYSTIMTQYLCACLVAVPWV

IATLNPLLHTLLMARLYFCSNNVIHHFFCDNNSLLPLSCSDTSLNQLMVL

TVVGLLFVVPSGCILASYAHILSAVMKIPSAQGKLKAFSTCGSHLALVIL

FYGAITKIYMTPISNHSTDKDLVASVIFIVVAPVLNPFIYSLRNNELKGA

LKKVLGHRKIFSQ*

>LoafORs108.6P

LGFSDRSQPELVLFVFFFFFYLLYLHFAGKHTTILLPELRPNFYTSM*FF

LTSISFLHLC*PTNIVPQLLVILGEQTNLSPMVVV*FSCISLGLLSTESI

LLGIMAFNHYAAVCKSLRYTVIMHPRLCALVASASWLNCFANSILQTVLT

SLLPFCGRNILEH/IRTLLCVVCPLLKHGCVDTTMNESEFFFVGVIILLI

PIVLIMFSHGQIVRAN*CIKSVAGR/KVSGRQRKSFGTCGSHLTVVSLFC

GRAIYVYLQPSNNYSQDQGKFISSVFYTSIIPMIDPLIYTLENKDVKGAF

KKI

>LoafORs108.7

MQRANDSTFPGFILLGFSGRPHLESVLFVVILIIYLLSFLGNSTIILLSI

LEPRLHTPMYFFLSNLSFMDLCLTTCTVPQTLVNFKGKDKIISYGGCVTQ

LFIAVSLGGVECILLSVMAYDRYAAVCRPLYYMVIMHPQLCLQLVATAWL

IGFGTSVVQTALTMTLPLCGKNQVDHFLCEVPVMLKLACTDTSINEAELF

AVSVLFLVVPLSLILVSYGHITHAVLMIKSVQGRWKAFGTCSSHVLVVII

FFGTLISVYLQPPSSYSQDVNKSITLFYTLVTPLLNPLIYTLRNKEVKGA

LRRLVGRTIA*

>LoafORs108.8T

MERANDSTFPGFILLGFSGRPHLETVLLVVILITYLLSFLGNGTIILLSI

LEPRLHTPMYFFLSNLSFTDLCLTTCTVPQALVNFKGKDKTISYGGCVTQ

LFIVLGLGGGECILLSVMAYDRYAAVCRPLHYMVIMHPWLCLQLVATAWL

TGFGNSVVQTALTMTLPLCGKNQVDHFFCEVPVMLKLACTNTSINEAESF

AVSVFFLVVPLSLILVSYGHITRAVLMIKSAQGRR

>LoafORs108.9P

NQSCQEQFILLGFSDRPRLEQILFVFVVIFYLVTLGG/VFRLDPSLQTPK

YFFLTNLSILDVCFTTSSIPQLLFNLGGPDKTISYTGCAIQLFMFLGLGG

TECDLLVVMAYDLFTAICKPLHYSVIMHSQLCWTLGSVAWGVGLLKSLAM

SPVTMKPPRCGRCRVKHFLYEMPALIKIACVGTVAVETTVFILSVIIVLV

PLSLILISYSYIAFAVLR/AAGRRKAFNTCGSHLTVVSLFYGNIIYMYTQ

PGNNSSQDQGKFLTFFYNLVTPMLNPVIYTLRNKDVKGALKRLL

>LoafORs108.10

MQAMEKENQTSVSEFLLLGFSSWPGHQVLLFSLFLCLYLTGLLGNLLILM

AIASDHHLHTPMYFFLANLSLVDLCLSSATVPKVLLNIQTQTQSISYPAC

LAQMYFCIMFAHMDNFLLTVMAYDRYVAICHPLHYSTIMTQSLCACLVAV

PWVIATLNPLLHTLMMAHLHFCSDNVIHHFFCDINSLLSLACSDTSLNQL

MALGTVGLLFVVPSGCILASYARIISAVMKIPSAQGKLKAFSTCGSHLTL

VIFFYGAITGIYMSPSSNHSTEKDSAASLIFMVVAPVLNPFIYSLKNNEL

KGALKKALHQRKTFS*

>LoafORs108.11P

MEKGNQTNVSEFLLLGFSNSPRHQALFLALFLCLYLTGLLGNLLILMAIA

SDHHLHIPMYFFLANLSLVDLCLSSTAVPKMLLNIQTQIQSISYPACLVQ

MYFSIMFT/PSVTLCITPLL*PRAFVAHLHFCSNNVIHHFFCDIRLRWGC

SLWYL*GVSWHPMPTSPLFVVPLGCILASYAHIISAVMKILSVQGKLKAF

STCGSHLTFVILFYGAITKTYMTPISNHSTDKGLVASVIFIVVAPILNPF

IYSLRNNELKGALKKVLDHRKIFSQ

>LoafORs108.12P

QKNGSSFTGFVLLRFSDRPHLELVLFIFFIFILLGNTPFYCPNWAQVFTP

LCAFFLTNISFLDLCYTSSIVPQLL/GTDKSIFYRGCVVQLYISLGLGST

EHILLGVIVFDHYAAVCRSLHYIVILYPCLCALVASASWLICFANYLLQT

VLVLFLPSCGRNILEHYLCEVCPLLKLGCVDITMNESELFFVGVIILLIP

IVLL/PIVLIMFSYGQIVRANLLITSAAGQREAFGTCGSHLTTVSLFYGR

AI*AYL*PSNSYFQG*SNFISLFYTTITPMINPLIYTLWNMNVNGAFKKI

LWKAYNSRLLGEK

>LoafORs108.13P

ERAKDSAFSGFILLGFSGRPHLETVLFVVILIIYLLSFLSNSTIVLLSVL

EPRLHTSVYFFLSNLSFMDLCLTTCTVPQTLVNFKGKDKTITYGGCVTQL

FIASGLGGVECILLSVMAYDCYAAVCRPLHYMVIMHPQLCLQLVATAWLT

RFGNSVMQTALTMTLPLCGRNQVDHFFCEVPLMLNLACTDTSINEAELFS

VSVFFLVVPLSLILVSYGRITHAVLMIKSAQGRQKAFGTCSSHVLVVIIF

FGTLISMYLQPPSSYSQDLNKSITFFYSLVTPLLNPLIYTLRNKEVKEVL

RRLVGRTIA

>LoafORs108.14P

MERANVSAFSGFILLGFSGRSHLETVLFVVILITYLLSFLGNSTIILLST

LEPHLHTPMYFFLSNLSFMDLCLTTCTVPQTLVNFKGKDKTITYGGCVTQ

LFIALGLGGVECILLSVMAYDRYVAVCRPLHYMVIMHPQLCLQLVATA*L

TGFGNSVMQTALTMTLPLCGKNQVDHFFCEVPVMLKLACTDTSINEAELF

SVSVFFLVVPLSLILVSYGHITRAVLMIKSAQGRQKAFGTCSSHVLLVII

FFGTLISMYLQPPSSYSQDVNKSIALFYTLVTPLLNPLIYMLRNKEVNVA

LRRLVGRTIASKE

>LoafORs108.15

MERANGTTFSRFILLGFSGRPRLETVLFVVILITYLLSFLGNSTIILLST

LERHLHTPMYFFLSNLSFMDLCLTTCTAPQTLVNFKGKDKTITYGGCVTQ

LFIALGLGGVECILLSVMAYDRYAAVCRPLHYMVIMHPQLCLQLVATAWL

TGFGTSVVQTALTMTLPLCGRNQVDHFFCEVPVMLKLACTNTSINEAEVL

AVSVFFLVVPLSLILVSYGHITRAVLMIKSAQGRRKAFGTCSSHVLVVII

FFGTLISMYLEPPSSYSQDMNKSMALFYTLVTPLLNPLIYTLRNKEVKGA

LKRLVGRTIASRKS*

>LoafORs108.16

MERANDSTFSRFILLGFSGRPHLETVLFVVILITYLLSFLGNGIIILLSI

LEPRLHTPMYFFLSNLSFMDLCLTTCTVPQALVNFKGKDKAITYGGCVTQ

LFIAVSLGGVECILLSVMAYDRYAAVCCPLHYMVIMHPQLCLQLVATAWL

IGFGNSVMQTALTMTLPLCGKNQVDHFFCEVPAMLKLACTDTSINEAELF

AVSVLFLVVPLSLILVSYGHITHAVLMIKSAQGRWKAFGTCGSHVLVVII

FFGTLISMYLQPPTSYSQDVNKSIALFYSLVTPLLNPMIYTLRNKEVKGA

LRRLVGRASKEG*

>LoafORs108.17

MGFSDRPRLEQILFVFVLIFYLVSLVGNIIIILVPRLDSSLHTPMYFFLT

NLSFLDLCFTTSSIPQLLFNLSGPDKTISYTGCAIQLFMFLGLGGTECVL

LAVMAYDRFTAICKPLSYSVIMHPQLCWTLVSVAWVAGLLNSLVMSPVTR

KLPRCGRCRVKHFLCEMPALIKIACVDTVAIESTVFILSVIIVLVPLSLI

LISYSYIALAVLRIKSAAGRRKAFNTCRSHLTVVSLFYGNIIYMYMQPGN

NSSQDQGKFLTLFYNLMTPMLNPVIYTLRNKDVKGALKRLLFRK*

>LoafORs108.18P

QKGEKCLQYTTIYLKKKKGLMFVNTGNFLLIVIAFDHRVVICHSLYYFTI

MTQRLCACLVVVPWFTAVLNPLVHT/PRAHTFMMVHLHFRISSVTATFSS

LYPVLTSLNQLMVLAVVRLLFVVTSGCILASYTHIISAVMEVTSAQRKLK

ALSTCGSHLGLVLLFSGAITKI*MTPISNHSTEKDSGIGDFHCGSPCMHR

VGFGSLCIDSFHLHYK*QQAEGALKKVLDRRKIF

>LoafORs108.19

MERSNDSSEHGFILVGFSDRPRLEMILFIVNFTLYSVAVLGNSTIILVCI

LDPRLHTPMYFFLANLSFLDLCFSTSCIPQMLVNLWGPDKTISYAGCVVQ

LFSFLSVGGTECILLAIMAYDRYAAVCKPLHYLVIMHPQLCLRLVAVAWG

SGLVNAIVMSPLTMTLSRCGRRQVNHFLCEMPALIKMACVDARAVEMLAF

TFAILIVLLPLTLILVSYGYIATAVLRIKSATGRQKAFNTCSSHLTVVSL

FYGSIIYMYMQPGNSSSQDQGKFLTLFYNLVTPMLNPLIYTLRNKEVKGA

LKKVLGWQQ*

>LoafORs108.20

MAELPVFVVLQVSYILTILGNLAIILVSCLDSKLHTPMYFFLTNLSLLDL

CYTTSTVPQMLINTCSTRKVISYGGCVAQLFIFLALGSTECLLLAVMSFD

RFVAICRPLRYSVIMHQRLCLQLAAASWISGFSNSVLQSTLTLQMPQCGH

KEVDHFFCEVPALLKLSCVDTTGNEAELFFVSVLFLLIPLTLIFTSYAFI

AQAMVRIQSAEGRQKTFGTCGSHLIVVSLFYGTAIYMYLQPPSLSSKDRG

KMVSLFYAIITPMLNPFIYTLRNKDVKGAFKRLVARVFLIKK*

>LoafORs108.21

MDWVNVSIPQEFILLGFSDRPWLEFPLFVVFLISYIVTIFGNLTVILVSR

LDSKLHTPMYFFLTNLSVLDLCYTTSTVPQMLVNLHSTRKVISYGGCVVQ

LFMFLSLGATECVLLAVMSFDRFAAICRPLHYPVIMHQRLCLQLAAASWV

TGFVISVWMSTLTLQLPLCGPYVIDHFLCEVPALLKLSCVDTTANEAELF

FGSVLFHLTPLILILISYAFIAQAVLRIQSAVGRQKAFGICGSHLIVVSL

FYGTAISMYLQPPSANSKDRGKMVSLFYGIIAPMMNPLIYTLRNKEVKEA

FKRLVARVFLTKE*

>LoafORs108.22

MWPQVMEKDNKSSFEGFILVGFSDRPHLELILFVVVLTFYLLTLLGNMAI

ILLSTLDSRLHTPMYFFLANLSFLDMCFTTGSIPQMLYNLWGPDKTISYL

GCAIQLYFVLALGGVECILLAVMAYDRYAAVCKPLQYTVIMHSRLCGQLV

SVAWLSGFGNSLIMAPQTLMLPRCGHRLVDHFLCEMPALIGMACVDTMIL

EALAFALAIFIILTPLSLILISYSYIARAVLRIKSAAGRKKAFNTCSSHL

IVVALFYGTIIYMYLQPANTYSQDQGKFLTLFYTIVTPSVNPLIYTLRNK

DVKEAMKKVLGKGGAEV*

>LoafORs108.23

MNKVNESIPWEFILLGFSDLPWLEFPLFVVFLVSYILTIFGNLAIILVSH

LDSKLHTPMYFFLTNLSLLDLCYTTSTVPQMLINTCSTRKVISYGGCVAQ

LFIFLALGSTECLLLAVMSFDRFVAICRPLRYSVIMHQRLCLQLAAASWI

SGFSNSVLQSTLTLQMPQCGHKEVDHFFCEVPALLKLSCVDTTANEAELF

FISVLFLLIPLTLILISYAFIAQAVLRIQSAEGRRKALGTCGSHLIVVSL

FYGTAIYMYLQPPSPASKDRGKMVSLFYGIITPMLNPLIYTLRNKDVKGA

FKRLVARVFLIKKKENDRPC*

>LoafORs109.1T

MPTHRGGNLSGLSLQEFVLVGFEGELETRVLLFAVFLVLYVVTVLGNLTM

IMVITLDVRLHSPMYFFLKNLSFLDLCYASVIAPKALVDFFSSTKIITFT

NCATQFFFFSLLATTETFLLVTMAYDRFMAICSPLHYPVTMCPSACTRLV

LGTYCGGCLNSIVQTSLTFSLPFCSSHHINHFFCDVPPLLQIACTNTALN

ELLLFGLCGLIIVGTTLIVLVSYGYITVTILRMRSGTGRHKVFSTCGSHM

TVVSLFYGTLFVMYAQPGAVRSMEQGKVVSIFYTLVIPMLNPLIYSX

>LoafORs109.2

MPTHGVGNLSGLSLQEFVLVGFEGELETRALLFAVFLALYVVTMLGNLTM

IMVITVDTRLHFPMYFFLKNLSLLDLCYSSVITPKALANLFSPTKVITFT

GCATQFFFFCLLGTTETFLLATMAYDRFMAICSPLQYPVTMCPSACTHLV

LGTYCGGCLNAILQTSLTFHLSFCSSHLINHFFCDVPPLLQIACTNKALN

ELVLFSIGGLIIVSTTLVVLVSYGYITVTILRMHSGTGRHKVFSTCGSHM

IAVSLFYGTIFVMYVQPGAVGTMEQGKVVSIFYTLVIPMLNPLIYSLQNK

DVKEALCRLGQKHAAT*

>LoafORs109.3

MPTHRDRNLSGLSLQEFVLVGFEGELETRALLFAVFLALYVVTMLGNLTM

IMVITVDTRLHSPMYFFLKNLSLLDLCYSSVIAPKALANLFSPTKVITFT

GCATQFFFFCLLGTTETFLLATMAYDRFMAICSPLRYPVTMCPSACTHLV

LGTYCGGCLNSIVQTSLTFRLSFCSSHLINHFFCDVPPLLQIACTNTAFN

ELVMFSICGLIIVSTTLVVLISYGYITVTILRMHSGTGRHKVFSTCGSHM

IAVSLFYGTIFVMYTQPEAVESMEQGKVVSIFYTLVIPMLNPLIYSLRNK

DVKEALWRLGRKHATT*

>LoafORs109.4

MPTHGNGNFSGLSLQMYVLVGFEGGLETQALLFAVFLTLYMATVLGNLTM

IVVITVDTHLHSPMYFFLKNLSFLDLCYSSVITPKSLANFFSQTKAITFT

GCATQFFFFSLLATTETFLLATMAYDHFMAICSPLHYPVIVCPSVCSRLV

LGAYCGGCLNSILQTSLTFRLPFCSSNRIDHFFCDVPPLLQIACTNTAIN

KLVMFSICGLIIVGTTLFVLISYGYITVTILRMHSGAGRHKVFSTCGSHM

IAVSLFYGTVFVMYAQPGAVESMQQGKVVSIFYTLVIPMLNPLIYSLWNK

DVKKALKRLGWKLVAT*

>LoafORs109.5P

MLTQGDGNLSDLSLQEFVLV*YEGGLETQALLFVVFLALNVVTLLGNLTM

IMVITVDVRLHSPMYFLLKNLSLLDLCYSSVITPKALANLFSPTKAITLA

IYATQFFFSLLNTTEHFLLAVMAYDRFMAICNPLHYPVTMCPSACAHLAL

GTYFGGWLNSILQISLTFCLPFCSSHRINHFCDMPPLLRITCVNTAFNEL

VKFGICRLITVGTTLIVLISYSYITVTILRMNWGTGRHEVFSTCGSHMVA

VSLFYGAVFVMYT*PGAVESMEQGKAVSIVYTLVIPTLNSLIYSLQNKEV

KEALKRLVQKH

>LoafORs109.6

MPTLRNGNASVVSLREFVLVGFEGGLKIQVLLFAVFLTLYMVTVLGNLTM

IVVITLDARLHSPMYFFLKNLSFLDLCYSSVIAPKALSNFFSSTKIITFA

GCATQLFFFALLVTTDGLLLGVMAYDRFMAICNPLRYPVTMCPSACTRLV

LGTYCGGCFNSIVQTSVALRVPFCSSNHINHYFCDLPSLLRIACADTALN

ELVMFGICGLIIVGVTCVVLVSYGYITVTILRMRSAAGRHKVFSTCGSHM

TVVTLFVGTVFVMYAHPGAIESMEQDKVVSIFYTLVTPMLNPLIYSLRNK

DVKEALKRLGQKHVAT*

>LoafORs109.7

MPTLKTGNASVVSLREFVLAGFEGGLKIQVLLFAVFLTLYMVTVLGNLTM

IVVITLDARLHSPMYFFLKNLSFLDLCYSSVIAPKALSDFFSSRKIITFA

GCATQLFFFALLVTTDGLLLGVMAYDRFMAICNPLRYPVTMCPSACTRLV

LGTYCGGCFNSIVQTSLALRVPFCSSNHINHYFCDLPSLLRIACANTALN

ELVMFGICGLIIVGVTCVVLVSYGYITVTILRMRSAAGRHKVFSTCGSHM

TVVTLFVGTVFVMYAHPGAIESMEQGKVVSIFYTLVIPMLNPLIYSLRNK

DVKEALKRLGQKHAAT*

>LoafORs109.8

MPTLRNGNASVVSLREFVLVGFEGGLKIQVLLFAVFLTLYMVTVLGNLTM

IVVITLDARLHSPMYFFLKNLSFLDLCYSSVIAPKALSNFFSSTKIITFA

GCATQLFFFALLVTTDGLLLGVMAYDRFMAICNPLRYPVTMCPSACTRLV

LGTYCGGCFNSIVQTSLALRVPFCSSNHINHYFCDLPSLLRIACANTALN

ELVMFGICGLIIVGVTCVVLVSYGYITVTILRMRSAAGRHKVFSTCGSHM

TAVTLFFGTVFVMYAQPGAIESMEQGKVVSIFYTLVTPMLNPLIYSLRNK

DVKEALKRLGQKHAAT*

>LoafORs109.9P

NTAFN*LVIFCICGLIIAGTTLVVLISYSYITVNILKMHLGTGRHKVSST

CGSHKIVVSLFYGSVFVTYTQPGA/RGKVVSMFYTLVISMLNPLIYSLWN

KDVKEALKRLGWKHVA

>LoafORs109.10P

PTHADGNLSGPPLQGYVLVGFEGGLETQTLLFAVFLALYMETMLGNLMMI

VVFTVDTRLHSPMYFFLKNLSFLDLCYSPIIAPRPLPN/PKALAKFFSLT

KAITFTGCATQFFFFSLLATTETFFLATMAYDHFMAICSLLRYPVIMCPS

VCSRVVL/CRGCLNSILQTSLTFRLPFCSSNHINHFFCDVPPLLQIACTN

TAINKVVMFNTCRLIIVGTTFFVLVSYGYITMTILRMHLGTGRHKAFSTC

GSHMIAVSLFYGTFFVMCAQPGAVEAME*GKVVSTFYTLVIPMLTPLV*S

LWNKDMKEALKRLSWKLIA

>LoafORs109.11

MRGKNVTEVSAFILVGFPSAPGMQYVLFLVFLLTYLFVLVENLAIILTVW

NSTSLHRPMYYFLGIMSSLDIWYVCDIIPKMLDGFLLQRKRISFMGCMTQ

LYFFSSLVCTECVLLASMAYDRYAAICHPLCYQVIMTTRLCVQLVAFSFM

SGFTISVIKIYFISRAMFCGSNVLNHFFCDISPILKLACTDLLTAELVDF

ILAFIMLVFPLVATVLSYGHIILAVLHVPSATGRWKAFSTCASHLTVVTI

FYMALLFMYVRPQAIDTRSSNKLISVLYTVLTPILNPLIYCLKNKEFKDA

LKKALVQLQFGRPHIGIQPF*

>LoafORs109.12

MKGENVTKVSTFILVGFPSAPGMQYVFFLIFLLTYLFVLVENLAIIFTVW

SSTSLHRPMYYFLSSMSSLEIWYVSDIIPKMLDGSLLQRKRISFMGCMTQ

LYFFSSLVCTECVLLASMAYDRYVAICHPLRYQVIMTTGLCVQLVAFSFV

SGFTISMIKVYFISSATFCGSSVLNHFFCDISPILKLACTGFSTAELVDF

ILAFIILVFPLVATALSYGHITLAVLRIPSATGRWKAFSTCASHLTVVTI

FYMAMIFIYVRPQAIDSRSSNKLISAVYTVLTPIINPLIYCLRNMEFKDA

LKKASGFGHAPS*

>LoafORs109.13

MRGENITKVSALILVGFPTVRGMQYVLFIIFLFTYLFVLVENLAVILTIW

SSTSLHRPMYYFLSSMSFLEIWYVSNIIPKMLDGFLLQRKCISFVGCMTQ

LYFFISLVCTECVLLASMAYDRYVAICHPLRYQVIMTTGLCVQLVAFSFA

SAFTVSVIKVYFISRAKFCGSIVLNHFFCDISPVLKLACTDFSTAELVDF

ILAFIILVFPLVATALSYGHITLAVLRIPSATGRWKAFSTCASHLTVVTI

FYMAMIFIYVRPQAIDSRSSNKLISAVYTVLTPIINPLIYCLRNMEFKDA

LKKASGFGHAPS*

>LoafORs109.14P

SPMSSLEIWYMCDIISMMLDGFLLQRKGISFVGCMIQLYFFNSLACTECV

CSWPHSL*PLCGHLPHPVQQSP**AQGFVSS*WPSPL*EALFAIYTNKDY

FISSATFCGSSVLNHFFCDIFPILRLTCTDFSTS/MFPRVATVLFY*HIT

LAVLCIPQPQTDFSTCDPPLSTGT

>LoafORs109.15

MRRENVTKVSAFILVGFPMAHGMQYVLFLIFLLTYLFVLVENLAIILTIW

ISTSLHRPMYYFLSSMSFLEIWYVCDIIPKMLDGFLLQRKGISFVGCMTQ

LYFFISLVDTECVLLASMAYDHYVAICHPLHYQVIMTTGLCVQLVAFSFA

SAFTVSVIKVYFISRAKFCGSNILNHFFCDISPILKLACTDFSTAELVDF

ILAFVILVFPLVATVLSYGHITLAVLRIPSATGRWKAFSTCASHLTVVTV

FYMAMIFIYVRPQAIDFRSSNKLISAVYTVLTPIINPLIYCLRNTEFKDA

LKKALDFGHAPS*

>LoafORs110.1P

MNSFTSVTIFFLTGFSDVQEIQILHAVLFLLIYLAAVLRNVLIITLTSKD

HQLHIPMYFFLKNLSFLDLCLISITVPKSIANSLANHTTILFLSCVSQVF

FFILSATTEVSLLTVMSYDCYVAICHPLRYEVLMSHGACVQMAASSWVSG

VLNAILHTASTFSIPVCGSPEVHQFCDVPQLLSLACSYNTVELVVIGLSL

VLDFGCFVFIDISYIHIFSTILRIPSREGRSRACLPHLTVVTRFLFSVFF

FFFFCLFTTLTQISITLGFAGVSILYYGATHHESRHLQSEK*GYEDGIKA

TVKE*ALPFKLGGLMSHIS

>LoafORs110.2P

HAILFLLIYMIALMGNTLIITFTSLDQCLSSPMYLFLKQLSHLRLLFHLS

HCTEICQ*FINTYQVHFFPGLYPTIVLSPLSSLFRVSLTVMVYDHY*AIC

HPLRYEAVMNRNFCMYLVVTSLLSAAMYTPIIFSLTFCSFFIQQFFCDVP

SL*RSHALPDILLKLSRLLSFFSWTRDALFPW*CPKYIDIFLALLRIPSA

QGRSKAFSTRLLQLLVKTLFFSTGTMPYLMPKSHSPSILNLLLSVFYTVV

PPTLSCMIYSLRNKSIKNALRKVNFGKISLYFN

>LoafORs110.3P

MANLIKVTDFILMGFSDFEELQILHAILFLLIYMTALMGNILVIILTSLD

QCLSTPMYFFLKHLSFLGSCFISVTVPK/IINSLAHTRSISFLGCATQSF

LVLYLAFSELVLLTVMAYDHYVAICHPLHYEVIMNRKFCMHLAAVSWLSG

GIGGGMYTSTTFSLTFCDFLIQQFFCDVPSLMKILCVSTHLTKTVTTAII

FFLALGCFISIAVSHL/HTYVLLAVLRIPSAQGRPKVFLTCLPHLFVMTL

FFSTGTTPYLIPKSDDSSVQDLILSVFYTVVPPTLNPMIYTLRNKDIKDA

LRKIL

>LoafORs110.4

MNNFTSVTIFFLTGFSDVREIQILHAVLFLLIYLAAVLGNVLIITLTSKD

HRLHTPMYFFLKNLSFLDLCLISITVPKSIANSLAHHNIFSFLSCVSQVF

FFILSATTEVSVLTVISYDCYVAICHPLRYEVLMSHGACVQMAASSWVSG

VLTAILHAASTFSIPVCGSPEVHQFFCDVPQLLSFACSYNTVELVVIGLS

LMLDFGCFVFIDISYIHIFSTILRIPSREGRCRAFSTCLPHLTVVTLFLF

SGVFAYLRPLPESPSPLDLLVSVFCTMVPPTTNPVIYSLRNKDMKMALKK

LLKSRHCPSN*

>LoafORs110.5P

QTRISMPEKLANITIIMEFLLMGFTDDWMLQRLYAALFFLIYLMTLMGNL

LIVTLTTTDLHLHAPVYFFLKNMSLIDISFISVTVPKSILNSL/LSKSHS

ISFLGCASQIFLFLFFGSTEYALLVVMSYDRYAAICHPLRYETIMNRGSC

VQMVTVSWLSGFVYGSIHVAGTFSVNFCGPNIVHQFFCDIPSLLTLACPG

EQILEYAFIIASFSFAFLCFLFMIVSYVHIFSAVLRIPSAQGRFKIVSTC

MPHLTVMALFLFSGVVTYLGTNYKPASSLNLFMSVLYSVLPPSRNPVIYS

LRNRDMKAALGKLLGGKMLLKM

>LoafORs110.6P

LKFLQTKISMPQKIADITEFLLMGFPDDWMLQKLCSPPLPDSTDGEPRHC

YPHHQRPASPSPHVLPPEKFVLN*HMLYLCHCPQVHHELSNSRSISFLGC

ASQVFLVIFFGGTEFALLTVMSYDRYAAICHPLHYETIMNRGACVQMVAA

SWLSGCGYGSIHVAGTFSVNFCGPNVVHQFFWDIPSLLTLACSGEHILEY

AFIIASCCFAFICFILMVVSYVHIFSSVLRIPSTQGRYKTVSTCMPHLTV

VTLFLSFGFFFFLGSALESPSSVNLFMSVLYSLLPPTLNLVIYSLRNRNM

KVALSKIFGGEMASKM

>LoafORs110.7P

MENYSETSTNFILLGLFPPSRIVLFLFILIILIVLMALVGNISMIILILL

DTYLHTPMYFLLSQLSLMDLNYISTIIPKMAYNLLFGNKSISFIGCGVQS

FFFLTLPDAEALLLASMAYDCYVAICFPLHYPIRMTKSVCVLMTTGSWIM

SSINACAHTACALHMPYCQSKTIDHFFCDFTAILALTHMDTWVFDYIVFV

CSTLFLAFPFIGITYSYGQVLLAIYCMPSSEGKKKAYSTCSTHLTVVT*Y

YAPFVYNYLHPRSFRSPTVDKVLAVFYTILTPMFNPVIYSLRNKEVMRAL

RRVTQRMFSV

>LoafORs110.8P

MHLENHTVTEFILSGLLQYIPTHFCLFALITVMFLVTLTGNNLLILVILI

DPHLHTLMYFFLCQLSLIDILFTSAIVPKILTDYLLHRTVISVFGCGIQM

FLGLSLGGAECMLLGLMSYDLYVAICKPLHYPLLMN*PFCRQMAVSSRAS

GSLNALIHTVYTMRFFCGNREINHFYCKLPGAVRLSCKDTMSCEIRMSIS

ITILLLIPFCHPCLLQAHPDRYYSNGFH*GIEESILHCSSHLMVVSLYYG

TINFMY

>LoafORs110.9P

KTENQNLGADFILLDIFQYGQMNSVLFVAIAGLFSLTLVGNIILTHLIRL

DTRLHAPMSFLLSQLSFIGLMYISTTVPKMAANFLSNSKSITFLGCEIQT

FVVLTLSGTEALLNFMSYDR/VAICHPLHYPVLMSKMICLFMVMCV*ASS

TNALTHTLYVSQLPFCRSWLINHFFCEVPSLMSLVHRDTSQYEYTVLFTI

LIILILPFLALLASYARVLIVAYPVSSGKRQTKVVSTYSSHPIVASLFYG

TALSTYTRPHSLHYPKEEKVVAIFYSIITTLLNPLIYNLGNKEVIRAMRR

LLG*WIFVQKI

>LoafORs110.10P

MTNHTLIMEFLLIGFTESWMLLRLHAAFFSLIYLVSAHNGKCSHHASHNS

*SMPPHSNVLFLRHLSFLDLCLISATVPKCILNSITFIDFNSFLGCALKL

FLLVLLPESEISILIAMSYDCYVAICCPLHYFWHYEAVVGKRPCVQMMAV

SWFNSRALGFLYSGGTFSLNFCGSNKTHQFLCDVSALLQLNFSEEHATIN

ISVFTGARYAFSCLVCIVVSYVYIFSTVLMIPSRQN*SKEFSTCRPLLIV

V/LPASSHCGVFLVTGAVAYLKPVSDAPSLLNLLVSVLYSVVPPTLNPVI

YCLRNKDVKSALCKVLWNVRNT

>LoafORs110.11P

MGTDNGTVSQEFLLLGFPGSQALQLSLFMLLLVMYILTVGGNVDILMLVS

TSHQLHTAMYFFLSNLSFLEIWYTTAAVPKTLAILLGKSQTISFTGCLLQ

TYLVFSLGCTEYFLLAAMAYDCYLAICCPLHYGAIMSSLLSVQLALGSWV

CRFLAVAVPTALISGLSFCGPHTINHFSCDIAHWIALTCTSTQVVELVAF

VIAFVVILSSCLITLVSYVFIISTILKIPSASSWSKAFSTCSSHLTVVLI

WYGSTI

>LoafORs110.12P

NHSIVTEFIILGLSRNPELQGVLFVIFLFIYLVAFLGNMLIVVAIIYNTT

LHTPMYVFLLAPAIVDIICTTSIIPKMLWTTLTSEEIISYGGCMSQLFFF

TWSLGAEMVLFTTMAYDRYVAICFPLRCTTIMNHHMCVALLSIVMAIAVT

SSLVHMGLILKLTFCGP/PHTIGHFLCETPPLLALSCSPVRVNELMVYVA

DDILAVGDFILTFISYGFIIAAILKIRTAEGKKKAFSTCSSHLIVVSLYY

SPVIYTYIHPATSYTFDKDKVVAALYTIVTPTLNLIVYSFQNKEMQVGIK

KVF

>LoafORs110.13P

MDVYNQTTITEFILIGLSDLPEVRYPLFVVFAAIYQVTLVGNGAILLAVG

TKQKLHTPMYYFLANLSLLDIFCPSATVPKMLENLLTKNQSISFVGCALQ

LFFLVALAGTEVFLLAVMAYDRYVAICFPLSYILIMTKGRCVKLTAGTWA

SGFLNSLLHTVFTFRLSFCKSNQVNQY/YCDIPPVVALSCSSTYVAEMLV

LVVGGILGISAFLITGISYIYIISTILKIRSAKGKCKAFSTCASHLLVVC

LFYGTTIFTYIHPSSSHHSPARDRLISMLYGVITPMLNPLIYSLRNTEVK

GALRKVLCRKACLKDR*YYSAFHLI

>LoafORs110.14

MEDNQKGNISNITYVILLGFGDLKEVGTALFLLFLSLYVVTLCGNLLLIL

AVQKSAHLHTPMYFFLCHLSCVDVGYTISIVPQLLREVVAGGVTISFTAC

VVQLYAFGALLTVECFLLAVMSYDRYLAICWPLRYSVLMDNRACVKLAVG

SWIGGLLFLGSMLILFATLTFCGPHIIDHFFCDFFPLVKLSCTDTAVVER

VAFASSFLSLSPFLWTLLSYSFIMFSILKISSSTGRYRAFSTCSSHLIVV

FVFYGTMVVVYMTPASGKTLNLNKILSLLCTVLTTLLNPLVYSLRNKGIQ

IALKKGAKLHWLKSNCG*

>LoafORs110.15P

EKAVHTHV*FCLANLSLLGIFYPSATVTKMLKNLLNEKQSFSFVGCALHL

FSL/FLGALACTEVFLLAVMAYDHYVIVCFPICYTFIIKNGCCFHSMAVA

WEADFLNSLLQTVFMFCLSFCKSNWVNQYYCDIFLMVALSCSSSYVAEIF

LLVVRDVLGMSTFLITGMSYIYILSTTLKIQSMEGKNKAFSTCASCLLVV

*LFYDTMIFTYIHPSSSYNFPAGDMFISMLCGVVTPMLSPIIYRLRNTEL

KGALRKILCHKICLGQ

>LoafORs110.16P

LKDNKRGNISTITYVILLVFGDLKEVGTALFPLFLSLYFVTLCGNLLLIL

AVQKSPHLHTPMYFFLCHLFCVDVGYTSSIAPQLRREVLAGGVTISFTAC

VVQLYAVGALLTVECFLLAIMSYGRYLAICWPLRYSVLMDSRTCVKLAVG

SWIGGFLFVGLY*FCLXXXXXXXXXXXXXXXXXXXXXXXXXXXXXXXXXX

FVSSFLSLSPFL*TLLSYDCILSSILKISSSTGRYRAFSTCFSHLVVLFL

FYGTMAVVHETPASEK/KKLNLNKILSLLYTVLTTLLNPLVYSLRKNGIQ

ITLKK

>LoafORs110.17P

EMDVYSRTTITEFIFTGLSDLLAMHYLLFVVFAAIYHFTLV*NRTILLAN

GTEKKLHTPMYNFLANLSLLDIFCPSATVLKMLKNLLNE/EKQSISFVEC

ALHLLFLVGLAGTQTFLLTVMAYKQDVAICFPLCYTLIMTNRCSFQPTAV

AWAAGFLNSLLHAVFTFCLSFCKSN

>LoafORs110.18P

FLGGLVGTEVFLLAVMACDQCGHIFPPSLHPPLDKQELCPAHG*YLGRGF

LNSLLHTVFTFQLSCCKSNQVNQYYCDTSPVVALSCSSTYVAEMLLFLSG

IVLGVSAFLIIGISYIYVISTILKIMSVEGKHGAFSTCAFHLLVLCLFYG

TTIITYILPSSSHHSPARDRLISMLYGVITPMLKPIIYSLRNKEIKGALR

KVLCHMACLREG

>LoafORs110.19P

MEKKNHTTVTEFLLLGFSTDPRMQNLHGILFLIAYSAPLTGNGLITFLIT

CDPWLHTSMYFFLKSFSFIDFCYISVTVSKFVVNSLMHRSSISFLGCVLQ

VFFFFFCSFYLCQISHSHSDVL*PLCGHLPSTAL*GHHEQWGLWTNGGGF

IHQWGWSLKQCTLQQHSP*FLVLIKSISFFCDIPQIILISDSKLNIGEIG

IIALIFSASLVCFVFIAYSYVHIFCIVQRISSSEGRNKALSTCTPYLVVV

ILFILTASLDYLTPPSNLRSVLDLTLSVFYTV

>LoafORs110.20P
[truncated: 3,958,722 more chars]
