# Supplementary material for: Extreme expansion of the olfactory receptor gene repertoire in African elephants and evolutionary dynamics of orthologous gene groups in 13 placental mammals
Source: HighWire-hosted journal article supplement (doi:10.1101/gr.169532.113), 2014-07-22
Supplement: Supplemental_TableS1.xlsx [file Supplemental_TableS1.xlsx]

## Sheet: genenum_sort_OGG_tab.txt
Table S1. Number of OR genes from each species in each OGG.
OGG	TOTAL INTACT	TOTAL TRUNC	TOTAL PSEUDO	ELEPHANT INTACT	ELEPHANT TRUNC	ELEPHANT PSEUDO	COW INTACT	COW TRUNC	COW PSEUDO	DOG INTACT	DOG TRUNC	DOG PSEUDO	HORSE INTACT	HORSE TRUNC	HORSE PSEUDO	RABBIT INTACT	RABBIT TRUNC	RABBIT PSEUDO	GUINEAPIG INTACT	GUINEAPIG TRUNC	GUINEAPIG PSEUDO	RAT INTACT	RAT TRUNC	RAT PSEUDO	MOUSE INTACT	MOUSE TRUNC	MOUSE PSEUDO	MARMOSET INTACT	MARMOSET TRUNC	MARMOSET PSEUDO	MACAQUE INTACT	MACAQUE TRUNC	MACAQUE PSEUDO	ORANGUTAN INTACT	ORANGUTAN TRUNC	ORANGUTAN PSEUDO	CHIMPANZEE INTACT	CHIMPANZEE TRUNC	CHIMPANZEE PSEUDO	HUMAN INTACT	HUMAN TRUNC	HUMAN PSEUDO
OGG2-1	159	9	271	1	0	0	43	2	77	25	2	10	14	1	110	28	0	28	12	0	17	11	2	3	8	0	0	2	0	0	0	0	0	9	1	13	3	1	6	3	0	7
OGG2-2	140	7	154	84	5	102	8	1	9	4	0	0	2	1	8	4	0	0	4	0	19	11	0	7	17	0	7	3	0	1	1	0	0	0	0	0	1	0	0	1	0	1
OGG2-3	114	6	388	27	2	30	12	0	13	4	0	2	8	0	23	14	0	45	19	1	14	15	0	4	11	0	3	1	0	1	2	1	8	0	1	73	0	1	85	1	0	87
OGG2-4	95	8	41	21	5	22	3	0	1	1	0	0	10	0	1	5	0	0	8	0	2	20	2	8	21	0	5	3	1	0	1	0	1	1	0	0	1	0	0	0	0	1
OGG2-5	95	2	87	5	0	14	16	1	14	7	0	0	7	0	8	9	1	4	11	0	20	23	0	3	14	0	3	1	0	4	1	0	4	1	0	5	0	0	4	0	0	4
OGG2-6	86	4	60	6	0	6	4	0	8	6	0	4	6	0	3	8	1	0	22	0	13	10	1	5	16	0	7	3	0	2	1	0	2	1	0	4	1	2	3	2	0	3
OGG2-7	79	4	81	33	0	50	1	0	2	1	0	0	2	0	0	3	0	1	12	0	22	14	4	1	12	0	1	1	0	0	0	0	0	0	0	1	0	0	2	0	0	1
OGG2-8	78	8	42	6	0	2	7	0	1	2	0	0	4	0	1	7	0	0	3	0	3	24	6	10	17	0	8	0	1	13	2	0	1	1	1	2	3	0	0	2	0	1
OGG2-9	78	4	82	17	4	23	8	0	28	4	0	1	6	0	11	6	0	0	3	0	9	17	0	4	13	0	6	1	0	0	1	0	0	0	0	0	1	0	0	1	0	0
OGG2-10	73	2	67	23	1	27	0	0	3	1	0	0	1	1	8	3	0	0	2	0	19	21	0	5	19	0	5	0	0	0	1	0	0	0	0	0	1	0	0	1	0	0
OGG2-11	71	1	108	17	0	30	0	0	1	2	0	0	1	0	7	2	0	4	6	0	14	15	0	3	15	0	0	5	1	2	2	0	2	0	0	0	4	0	27	2	0	18
OGG2-12	71	0	59	7	0	0	7	0	1	5	0	0	15	0	38	4	0	1	7	0	9	4	0	1	5	0	1	3	0	2	3	0	0	4	0	3	4	0	1	3	0	2
OGG2-13	66	2	18	6	1	3	22	1	4	13	0	4	5	0	0	2	0	0	6	0	3	7	0	0	5	0	0	0	0	0	0	0	0	0	0	1	0	0	1	0	0	2
OGG2-14	65	1	76	0	0	0	8	0	7	5	0	0	7	0	7	2	0	2	4	1	40	13	0	5	7	0	5	0	0	0	4	0	1	2	0	1	8	0	3	5	0	5
OGG2-15	61	3	37	9	0	6	1	0	0	1	0	0	4	0	5	2	0	0	5	0	6	23	1	12	15	0	4	0	0	1	0	0	1	0	2	1	0	0	1	1	0	0
OGG2-16	56	3	118	7	0	16	6	0	4	5	0	0	11	1	47	1	0	0	4	1	42	1	0	0	1	0	0	2	0	1	3	1	1	6	0	2	5	0	2	4	0	3
OGG2-17	56	2	59	32	1	27	9	1	4	4	0	0	9	0	17	0	0	0	0	0	8	0	0	0	0	0	1	0	0	0	0	0	0	0	0	1	1	0	0	1	0	1
OGG2-18	56	2	29	8	0	0	3	0	1	5	0	0	10	0	18	3	0	1	3	0	4	9	0	4	6	0	1	1	0	0	0	0	0	2	2	0	3	0	0	3	0	0
OGG2-19	55	0	27	0	0	1	3	0	2	3	0	1	4	0	3	12	0	6	16	0	7	9	0	0	4	0	0	0	0	1	1	0	2	2	0	2	1	0	1	0	0	1
OGG2-20	53	1	38	28	1	19	3	0	2	2	0	0	1	0	2	6	0	0	2	0	10	4	0	3	4	0	2	0	0	0	0	0	0	0	0	0	2	0	0	1	0	0
OGG2-21	52	1	18	11	1	10	1	0	0	0	0	0	5	0	0	0	0	1	8	0	2	15	0	1	12	0	4	0	0	0	0	0	0	0	0	0	0	0	0	0	0	0
OGG2-22	51	4	33	46	4	20	1	0	5	1	0	0	0	0	5	1	0	0	0	0	1	1	0	0	1	0	0	0	0	0	0	0	0	0	0	0	0	0	1	0	0	1
OGG2-23	51	0	15	3	0	5	3	0	1	5	0	0	3	0	1	2	0	0	3	0	3	11	0	3	12	0	1	2	0	0	2	0	0	1	0	1	2	0	0	2	0	0
OGG2-24	48	2	42	4	0	5	3	0	4	1	0	0	5	0	2	3	1	0	3	0	8	14	1	11	12	0	9	0	0	0	1	0	0	0	0	0	1	0	1	1	0	2
OGG2-25	48	1	19	4	0	0	6	0	2	3	0	1	5	0	8	2	0	1	3	0	0	2	0	1	3	0	0	6	0	2	3	0	0	4	1	2	3	0	1	4	0	1
OGG2-26	48	1	11	11	1	4	7	0	0	0	0	1	8	0	0	2	0	0	2	0	2	9	0	0	7	0	1	0	0	1	0	0	1	0	0	1	1	0	0	1	0	0
OGG2-27	47	2	31	8	0	4	2	0	6	1	0	0	1	0	2	6	0	0	7	0	14	8	0	3	5	0	1	2	2	0	2	0	0	0	0	0	2	0	1	3	0	0
OGG2-28	46	1	27	11	0	23	5	0	0	3	0	0	8	0	0	1	0	0	2	0	0	5	0	1	7	0	0	1	0	0	0	1	1	1	0	1	1	0	0	1	0	1
OGG2-29	46	0	7	2	0	1	1	0	0	0	0	0	0	0	0	7	0	0	1	0	2	14	0	2	18	0	1	0	0	0	1	0	0	0	0	1	1	0	0	1	0	0
OGG2-30	44	3	53	13	1	13	0	0	2	2	0	0	12	2	10	2	0	5	3	0	13	4	0	3	3	0	0	0	0	0	0	0	1	2	0	1	2	0	2	1	0	3
OGG2-31	44	0	38	2	0	19	2	0	3	0	0	1	3	0	0	7	0	0	3	0	0	20	0	10	1	0	2	0	0	0	2	0	1	3	0	0	0	0	1	1	0	1
OGG2-32	43	2	74	15	0	47	1	0	2	3	0	1	6	2	12	3	0	0	1	0	7	4	0	1	3	0	0	2	0	2	1	0	1	0	0	0	2	0	1	2	0	0
OGG2-33	43	1	26	1	0	0	4	0	1	2	0	0	2	0	1	5	0	7	10	0	8	9	1	7	10	0	2	0	0	0	0	0	0	0	0	0	0	0	0	0	0	0
OGG2-34	43	0	33	6	0	6	6	0	0	5	0	0	7	0	19	2	0	0	3	0	6	3	0	0	1	0	0	0	0	0	2	0	0	2	0	1	3	0	0	3	0	1
OGG2-35	42	2	74	15	0	26	2	0	5	3	0	1	3	0	33	4	1	1	2	0	8	4	0	0	3	0	0	2	0	0	1	0	0	0	0	0	2	1	0	1	0	0
OGG2-36	41	2	90	23	1	40	2	0	10	1	0	0	4	1	35	3	0	0	1	0	3	0	0	1	2	0	0	2	0	0	0	0	0	0	0	0	1	0	1	2	0	0
OGG2-37	39	2	28	7	0	12	2	0	2	0	0	0	3	0	2	0	0	3	2	0	0	12	1	1	10	0	2	1	0	1	1	0	0	1	1	2	0	0	1	0	0	2
OGG2-38	38	3	64	14	2	47	1	0	0	1	0	1	0	0	0	0	0	0	2	1	12	12	0	3	4	0	0	0	0	1	1	0	0	1	0	0	1	0	0	1	0	0
OGG2-39	38	0	24	4	0	6	12	0	5	0	0	0	6	0	2	3	0	0	0	0	0	5	0	4	3	0	3	0	0	0	2	0	0	0	0	2	2	0	1	1	0	1
OGG2-40	37	0	21	8	0	4	7	0	8	3	0	3	7	0	5	2	0	0	1	0	1	2	0	0	2	0	0	1	0	0	1	0	0	1	0	0	1	0	0	1	0	0
OGG2-41	36	1	25	11	0	5	0	0	11	2	1	0	1	0	1	3	0	0	3	0	1	8	0	4	8	0	3	0	0	0	0	0	0	0	0	0	0	0	0	0	0	0
OGG2-42	36	1	10	14	0	3	3	0	3	5	0	0	2	0	1	1	0	0	0	0	2	5	0	0	3	0	0	0	0	0	1	0	0	0	1	1	1	0	0	1	0	0
OGG2-43	35	3	43	15	2	24	3	0	0	1	0	0	1	0	1	3	0	0	3	0	12	2	1	1	5	0	0	1	0	1	0	0	0	0	0	0	0	0	3	1	0	1
OGG2-44	35	1	6	4	0	3	6	1	0	1	0	1	7	0	1	3	0	0	1	0	0	2	0	0	2	0	0	2	0	0	2	0	0	1	0	1	2	0	0	2	0	0
OGG2-45	35	0	77	8	0	1	4	0	2	1	0	0	4	0	0	1	0	0	3	0	2	7	0	72	6	0	0	0	0	0	1	0	0	0	0	0	0	0	0	0	0	0
OGG2-46	35	0	27	10	0	10	8	0	1	1	0	0	3	0	2	2	0	0	4	0	0	2	0	0	1	0	1	1	0	2	1	0	1	0	0	4	1	0	3	1	0	3
OGG2-47	34	0	39	3	0	9	3	0	13	1	0	0	3	0	7	3	0	0	8	0	6	5	0	1	7	0	2	0	0	0	0	0	0	0	0	0	1	0	0	0	0	1
OGG1-1	34	0	37	4	0	2	13	0	15	1	0	1	4	0	1	0	0	1	7	0	15	0	0	0	0	0	0	1	0	0	1	0	0	1	0	1	1	0	1	1	0	0
OGG2-48	33	4	16	11	0	10	2	0	0	1	0	0	6	0	2	1	0	0	2	3	2	3	0	1	3	0	0	1	0	0	1	0	0	1	1	0	0	0	1	1	0	0
OGG2-49	32	6	16	3	0	6	2	4	0	4	0	1	3	0	2	2	0	0	2	0	1	3	0	1	3	0	1	1	2	1	2	0	1	2	0	1	3	0	1	2	0	0
OGG2-50	32	3	72	11	1	36	6	2	9	1	0	0	2	0	5	1	0	0	7	0	17	1	0	0	1	0	0	1	0	0	1	0	0	0	0	0	0	0	2	0	0	3
OGG2-51	32	3	49	3	0	3	7	1	17	5	0	2	1	0	7	2	0	1	1	0	9	3	1	1	4	0	0	2	0	0	1	1	1	0	0	1	1	0	4	2	0	3
OGG2-52	32	1	8	4	0	0	3	1	3	3	0	1	2	0	0	1	0	0	0	0	0	4	0	1	6	0	0	2	0	0	1	0	0	3	0	1	1	0	2	2	0	0
OGG2-53	32	0	59	2	0	0	8	0	24	4	0	3	6	0	19	4	0	3	1	0	1	1	0	0	1	0	0	0	0	1	1	0	1	0	0	1	2	0	2	2	0	4
OGG2-54	32	0	10	1	0	2	6	0	2	3	0	0	1	0	2	3	0	1	0	0	0	5	0	1	3	0	0	2	0	0	2	0	0	2	0	2	1	0	0	3	0	0
OGG2-55	31	4	53	16	3	13	0	0	0	0	0	0	10	1	34	0	0	0	0	0	1	1	0	0	2	0	0	1	0	0	1	0	1	0	0	2	0	0	1	0	0	1
OGG2-56	31	1	20	5	1	1	2	0	2	0	0	0	3	0	0	5	0	2	1	0	4	9	0	3	3	0	6	0	0	0	1	0	1	1	0	0	1	0	0	0	0	1
OGG2-57	31	0	7	4	0	0	4	0	0	1	0	0	3	0	2	3	0	0	3	0	1	4	0	1	5	0	1	1	0	1	1	0	0	0	0	1	1	0	0	1	0	0
OGG2-58	30	2	27	4	0	3	4	0	0	0	0	2	9	0	8	2	0	0	4	2	14	1	0	0	2	0	0	1	0	0	1	0	0	1	0	0	1	0	0	0	0	0
OGG2-59	30	2	21	1	0	1	4	0	1	4	1	0	5	0	11	0	0	1	2	0	1	5	0	2	6	0	2	0	0	2	1	0	0	1	0	0	0	1	0	1	0	0
OGG2-60	30	2	12	9	1	4	1	0	0	1	0	0	1	0	1	1	0	0	2	0	0	5	0	4	9	0	1	1	0	0	0	0	0	0	1	0	0	0	1	0	0	1
OGG2-61	30	0	31	11	0	8	1	0	1	1	0	1	1	0	5	1	0	0	3	0	6	3	0	1	3	0	2	1	0	0	0	0	2	1	0	3	2	0	1	2	0	1
OGG1-2	30	0	21	2	0	3	8	0	5	2	0	0	4	0	0	1	0	0	5	0	10	2	0	0	1	0	0	1	0	0	1	0	1	1	0	0	1	0	1	1	0	1
OGG2-62	30	0	19	11	0	6	3	0	0	1	0	1	6	0	4	1	0	0	0	0	0	2	0	0	2	0	3	0	0	0	1	0	1	0	0	3	1	0	1	2	0	0
OGG2-63	30	0	15	1	0	1	7	0	0	0	0	0	7	0	1	1	0	0	1	0	2	1	0	1	1	0	1	0	0	1	3	0	1	2	0	3	3	0	2	3	0	2
OGG2-64	29	3	14	15	1	11	2	0	0	1	0	0	1	0	0	3	0	0	0	0	2	1	2	0	2	0	0	1	0	0	1	0	0	0	0	1	1	0	0	1	0	0
OGG2-65	29	1	38	12	1	2	1	0	0	1	0	0	0	0	27	1	0	0	2	0	8	2	0	0	2	0	0	2	0	0	2	0	1	2	0	0	1	0	0	1	0	0
OGG2-66	29	1	22	4	0	2	6	0	6	1	0	0	2	0	5	1	0	0	1	1	7	2	0	1	3	0	0	3	0	1	2	0	0	0	0	0	2	0	0	2	0	0
OGG2-67	29	1	18	0	0	0	1	0	1	0	0	0	2	0	3	3	1	1	4	0	6	11	0	1	8	0	3	0	0	1	0	0	0	0	0	2	0	0	0	0	0	0
OGG2-68	29	1	5	4	0	1	2	0	0	5	0	1	2	0	0	2	0	0	2	0	0	3	0	0	3	0	0	1	0	0	2	0	0	0	0	3	1	1	0	2	0	0
OGG2-69	29	0	33	0	0	1	0	0	3	0	0	0	1	0	2	2	0	0	4	0	3	12	0	21	8	0	0	1	0	0	1	0	0	0	0	1	0	0	1	0	0	1
OGG1-3	29	0	10	2	0	0	6	0	2	2	0	0	2	0	1	2	0	0	5	0	5	2	0	0	2	0	0	1	0	1	1	0	0	1	0	0	2	0	0	1	0	1
OGG2-70	28	1	72	7	0	37	3	0	9	3	0	0	3	0	20	2	1	1	0	0	2	2	0	1	2	0	0	2	0	1	0	0	1	0	0	0	2	0	0	2	0	0
OGG2-71	28	1	7	2	0	0	4	0	0	4	0	0	2	0	0	2	0	0	4	0	4	2	0	1	2	0	0	1	1	0	0	0	1	2	0	0	1	0	1	2	0	0
OGG2-72	27	1	23	9	0	9	4	0	2	1	0	2	2	0	3	2	0	1	1	0	2	3	1	0	3	0	0	0	0	1	0	0	1	1	0	1	1	0	1	0	0	0
OGG2-73	27	0	24	5	0	6	3	0	1	1	0	1	2	0	2	2	0	1	3	0	11	2	0	1	2	0	0	1	0	0	1	0	0	1	0	1	2	0	0	2	0	0
OGG1-4	27	0	8	3	0	0	4	0	1	2	0	0	3	0	1	3	0	0	4	0	1	3	0	0	2	0	0	2	0	0	0	0	2	1	0	1	0	0	1	0	0	1
OGG2-74	26	3	17	4	1	5	2	0	1	2	0	0	2	0	0	3	0	1	2	0	5	3	0	1	3	0	1	1	1	0	1	0	1	2	0	0	1	1	1	0	0	1
OGG2-75	26	0	50	7	0	19	0	0	6	6	0	2	1	0	9	3	0	2	0	0	4	6	0	5	3	0	0	0	0	1	0	0	0	0	0	0	0	0	1	0	0	1
OGG2-76	26	0	22	8	0	14	0	0	3	9	0	1	2	0	1	0	0	0	1	0	2	1	0	0	3	0	0	1	0	0	0	0	1	0	0	0	0	0	0	1	0	0
OGG1-5	26	0	22	1	0	0	5	0	7	2	0	4	3	0	0	3	0	0	5	0	5	2	0	0	3	0	1	0	0	2	0	0	2	0	0	1	1	0	0	1	0	0
OGG2-77	25	1	20	2	0	1	2	0	1	5	0	1	1	0	6	0	0	1	1	0	0	3	0	0	2	0	2	3	0	1	2	0	1	1	1	2	2	0	2	1	0	2
OGG1-6	25	1	11	6	0	3	2	1	1	2	0	0	1	0	0	1	0	2	1	0	1	2	0	0	1	0	0	2	0	0	2	0	0	2	0	1	1	0	2	2	0	1
OGG2-78	25	1	6	2	0	1	4	0	0	2	0	1	4	0	0	2	0	0	2	0	0	1	0	0	1	0	0	3	0	0	0	0	2	1	0	2	1	1	0	2	0	0
OGG1-7	25	0	23	2	0	1	5	0	4	2	0	0	3	0	1	2	0	0	7	0	16	2	0	0	2	0	0	0	0	1	0	0	0	0	0	0	0	0	0	0	0	0
OGG2-79	25	0	19	1	0	2	2	0	0	1	0	1	3	0	6	1	0	0	7	0	3	5	0	0	3	0	3	0	0	2	0	0	0	1	0	1	1	0	0	0	0	1
OGG2-80	25	0	5	1	0	1	1	0	1	2	0	0	3	0	1	2	0	0	3	0	1	2	0	0	2	0	0	1	0	1	2	0	0	2	0	0	2	0	0	2	0	0
OGG1-8	25	0	4	4	0	0	3	0	0	4	0	2	1	0	1	1	0	1	5	0	0	1	0	0	2	0	0	2	0	0	0	0	0	0	0	0	1	0	0	1	0	0
OGG1-9	25	0	4	1	0	0	3	0	0	1	0	0	4	0	0	3	0	1	3	0	2	0	0	0	1	0	0	2	0	0	0	0	1	3	0	0	2	0	0	2	0	0
OGG2-81	24	2	24	4	0	5	1	0	3	1	0	1	5	0	9	2	0	0	1	2	4	2	0	0	3	0	0	1	0	0	1	0	0	1	0	0	1	0	1	1	0	1
OGG2-82	24	2	14	11	0	3	1	1	6	1	0	0	0	0	1	1	0	0	0	0	3	4	1	0	4	0	1	0	0	0	0	0	0	0	0	0	1	0	0	1	0	0
OGG2-83	24	1	17	5	1	1	1	0	2	2	0	0	1	0	3	4	0	1	3	0	4	3	0	0	3	0	0	0	0	1	1	0	0	0	0	2	1	0	1	0	0	2
OGG1-10	24	1	13	4	0	0	3	0	3	3	0	0	2	0	4	1	0	0	2	0	2	3	1	1	2	0	1	0	0	0	1	0	0	1	0	2	1	0	0	1	0	0
OGG2-84	24	1	11	4	0	3	2	0	1	2	0	0	4	0	0	2	0	0	0	0	3	1	1	0	2	0	0	1	0	0	2	0	0	1	0	2	1	0	0	2	0	2
OGG2-85	24	1	9	4	0	1	2	0	0	1	0	0	1	1	1	1	0	0	2	0	4	4	0	3	6	0	0	0	0	0	1	0	0	0	0	0	1	0	0	1	0	0
OGG2-86	24	0	26	3	0	4	4	0	2	2	0	2	3	0	5	3	0	1	2	0	3	2	0	0	2	0	0	0	0	1	1	0	1	1	0	2	1	0	4	0	0	1
OGG2-87	24	0	15	3	0	1	5	0	0	2	0	0	2	0	3	2	0	1	5	0	2	2	0	2	3	0	3	0	0	0	0	0	0	0	0	1	0	0	1	0	0	1
OGG2-88	24	0	14	4	0	3	3	0	1	2	0	0	2	0	1	3	0	0	1	0	8	2	0	0	2	0	0	1	0	1	0	0	0	0	0	0	2	0	0	2	0	0
OGG2-89	24	0	4	0	0	1	1	0	0	0	0	0	1	0	0	0	0	0	0	0	2	13	0	0	9	0	1	0	0	0	0	0	0	0	0	0	0	0	0	0	0	0
OGG2-90	23	2	46	3	1	23	9	1	10	1	0	0	3	0	4	0	0	1	0	0	4	2	0	0	2	0	0	1	0	0	0	0	0	2	0	0	0	0	2	0	0	2
OGG1-11	23	1	7	4	0	0	3	0	0	2	0	1	1	0	1	1	0	1	3	0	4	4	0	0	2	0	0	0	1	0	0	0	0	1	0	0	1	0	0	1	0	0
OGG2-91	23	1	6	2	0	0	1	1	1	2	0	1	2	0	0	3	0	0	2	0	3	2	0	0	2	0	0	1	0	0	1	0	0	1	0	1	1	0	0	3	0	0
OGG2-92	23	0	4	2	0	0	1	0	0	0	0	0	0	0	0	0	0	1	0	0	0	11	0	3	9	0	0	0	0	0	0	0	0	0	0	0	0	0	0	0	0	0
OGG2-93	23	0	3	7	0	0	2	0	0	0	0	1	3	0	0	1	0	0	1	0	0	1	0	0	1	0	0	1	0	1	1	0	0	2	0	0	1	0	1	2	0	0
OGG2-94	22	4	38	0	2	5	0	0	1	10	1	3	1	0	22	1	0	0	0	0	5	6	1	2	3	0	0	0	0	0	0	0	0	0	0	0	1	0	0	0	0	0
OGG2-95	22	3	8	3	0	0	2	0	1	0	0	0	0	0	1	1	0	0	1	0	0	7	3	4	8	0	1	0	0	0	0	0	1	0	0	0	0	0	0	0	0	0
OGG2-96	22	2	51	4	1	8	8	0	19	1	0	0	3	1	17	1	0	0	1	0	5	0	0	1	1	0	0	1	0	0	1	0	0	0	0	0	1	0	0	0	0	1
OGG2-97	22	2	7	4	0	4	2	0	0	0	0	1	2	0	0	1	0	0	0	0	1	3	2	0	6	0	1	1	0	0	1	0	0	1	0	0	1	0	0	0	0	0
OGG2-98	22	1	7	2	0	0	1	0	0	2	0	0	2	0	2	3	0	0	1	0	1	2	0	0	3	0	0	2	0	0	1	0	1	1	1	1	1	0	1	1	0	1
OGG2-99	22	0	23	16	0	9	0	0	0	0	0	0	1	0	3	0	0	0	2	0	3	2	0	4	1	0	0	0	0	1	0	0	1	0	0	1	0	0	0	0	0	1
OGG2-100	22	0	14	3	0	0	2	0	4	0	0	4	1	0	1	2	0	0	1	0	0	2	0	0	1	0	0	0	0	0	2	0	2	3	0	0	3	0	1	2	0	2
OGG2-101	22	0	12	2	0	1	4	0	2	0	0	0	3	0	0	2	0	0	1	0	1	3	0	3	6	0	1	0	0	1	1	0	0	0	0	1	0	0	1	0	0	1
OGG2-102	22	0	9	4	0	1	2	0	1	2	0	0	1	0	1	0	0	1	0	0	2	3	0	0	3	0	0	1	0	0	2	0	0	2	0	0	0	0	1	2	0	2
OGG2-103	22	0	7	2	0	1	2	0	0	2	0	0	2	0	0	2	0	0	5	0	1	3	0	1	2	0	1	0	0	1	1	0	0	1	0	0	0	0	1	0	0	1
OGG2-104	22	0	4	2	0	0	7	0	2	2	0	0	2	0	0	1	0	0	2	0	0	2	0	0	2	0	0	0	0	0	1	0	0	0	0	1	0	0	1	1	0	0
OGG2-105	21	2	27	1	0	13	2	0	0	0	0	2	3	0	0	2	0	2	0	0	0	4	0	1	4	0	1	0	0	1	1	0	1	0	0	3	2	2	2	2	0	1
OGG2-106	21	1	12	2	0	0	5	0	1	2	0	0	3	0	1	0	0	1	0	0	1	1	0	0	0	0	1	1	1	1	1	0	1	1	0	3	2	0	2	3	0	0
OGG2-107	21	0	12	0	0	2	3	0	7	0	0	0	2	0	2	1	0	0	0	0	0	10	0	1	5	0	0	0	0	0	0	0	0	0	0	0	0	0	0	0	0	0
OGG2-108	21	0	10	4	0	1	1	0	0	2	0	0	1	0	1	2	0	0	1	0	6	2	0	1	3	0	0	1	0	0	1	0	0	0	0	0	2	0	1	1	0	0
OGG2-109	21	0	8	1	0	3	2	0	0	2	0	0	4	0	0	1	0	1	2	0	0	2	0	0	1	0	2	1	0	0	1	0	1	2	0	0	2	0	0	0	0	1
OGG2-110	21	0	5	5	0	0	3	0	1	1	0	0	2	0	1	1	0	0	1	0	0	2	0	1	2	0	1	1	0	0	1	0	0	0	0	1	1	0	0	1	0	0
OGG2-111	21	0	5	1	0	0	1	0	0	1	0	0	4	0	1	1	0	0	3	0	0	3	0	1	3	0	2	1	0	0	1	0	0	0	0	1	1	0	0	1	0	0
OGG2-112	21	0	4	2	0	0	2	0	0	0	0	0	2	0	0	2	0	0	2	0	0	2	0	0	2	0	0	1	0	0	1	0	1	2	0	2	2	0	0	1	0	1
OGG2-113	21	0	1	5	0	0	4	0	0	4	0	0	2	0	1	1	0	0	1	0	0	2	0	0	2	0	0	0	0	0	0	0	0	0	0	0	0	0	0	0	0	0
OGG2-114	20	2	12	4	0	3	9	2	4	1	0	0	1	0	3	0	0	0	0	0	1	1	0	0	1	0	0	1	0	0	0	0	0	0	0	1	1	0	0	1	0	0
OGG2-115	20	2	2	7	1	0	1	0	0	1	0	0	2	0	1	2	0	0	1	0	0	0	1	0	1	0	0	2	0	0	0	0	1	1	0	0	1	0	0	1	0	0
OGG2-116	20	1	15	3	0	0	1	1	1	2	0	0	3	0	0	1	0	1	0	0	8	3	0	1	5	0	0	0	0	0	0	0	0	1	0	1	1	0	1	0	0	2
OGG2-117	20	1	14	3	0	3	6	1	1	1	0	0	4	0	3	2	0	2	2	0	0	1	0	0	1	0	0	0	0	1	0	0	1	0	0	1	0	0	1	0	0	1
OGG1-12	20	1	6	1	0	1	2	0	0	2	1	1	2	0	1	2	0	1	2	0	0	6	0	0	3	0	1	0	0	0	0	0	1	0	0	0	0	0	0	0	0	0
OGG1-13	20	0	13	2	0	1	4	0	10	0	0	2	2	0	0	2	0	0	0	0	0	2	0	0	2	0	0	1	0	0	1	0	0	1	0	0	2	0	0	1	0	0
OGG2-118	19	1	4	1	1	0	0	0	0	1	0	0	2	0	0	2	0	0	3	0	3	3	0	0	3	0	0	1	0	0	1	0	0	0	0	1	1	0	0	1	0	0
OGG2-119	19	0	28	3	0	2	1	0	3	0	0	1	3	0	1	1	0	0	3	0	3	2	0	16	2	0	1	1	0	0	0	0	1	1	0	0	1	0	0	1	0	0
OGG2-120	19	0	15	10	0	4	2	0	0	1	0	2	1	0	0	1	0	0	0	0	1	0	0	1	0	0	0	1	0	1	1	0	1	1	0	2	1	0	1	0	0	2
OGG2-121	19	0	14	0	0	2	0	0	3	4	0	4	4	0	1	1	0	0	4	0	4	3	0	0	3	0	0	0	0	0	0	0	0	0	0	0	0	0	0	0	0	0
OGG2-122	19	0	11	6	0	1	1	0	2	0	0	0	3	0	1	2	0	1	2	0	0	4	0	5	1	0	1	0	0	0	0	0	0	0	0	0	0	0	0	0	0	0
OGG2-123	19	0	11	2	0	0	1	0	3	1	0	1	0	0	2	2	0	0	0	0	1	7	0	0	6	0	1	0	0	0	0	0	0	0	0	1	0	0	1	0	0	1
OGG2-124	19	0	10	2	0	5	0	0	1	1	0	0	2	0	1	1	0	0	0	0	0	7	0	1	4	0	0	1	0	0	1	0	0	0	0	0	0	0	1	0	0	1
OGG1-14	19	0	9	2	0	2	2	0	0	2	0	0	2	0	1	0	0	2	2	0	0	2	0	0	1	0	0	1	0	1	0	0	2	2	0	0	1	0	1	2	0	0
OGG2-125	19	0	5	6	0	1	0	0	1	1	0	0	2	0	1	2	0	0	0	0	1	2	0	0	1	0	1	2	0	0	1	0	0	0	0	0	1	0	0	1	0	0
OGG2-126	18	2	66	6	1	16	1	1	3	2	0	2	1	0	32	0	0	2	0	0	3	3	0	4	2	0	0	1	0	1	0	0	1	0	0	0	1	0	1	1	0	1
OGG2-127	18	2	23	0	0	0	1	0	7	5	0	3	1	1	6	0	0	0	3	0	4	0	0	0	1	0	0	1	0	0	2	0	1	0	1	2	2	0	0	2	0	0
OGG1-15	18	2	2	1	0	0	6	1	0	1	0	0	1	0	0	1	0	0	2	0	2	0	1	0	1	0	0	1	0	0	1	0	0	1	0	0	1	0	0	1	0	0
OGG2-128	18	1	19	4	0	1	3	0	7	1	0	0	2	0	6	1	0	0	1	0	3	1	1	1	3	0	0	1	0	0	1	0	0	0	0	0	0	0	0	0	0	1
OGG2-129	18	1	11	2	0	1	1	0	0	1	0	1	7	0	0	0	0	0	0	0	2	0	1	0	1	0	0	1	0	0	2	0	1	0	0	4	2	0	1	1	0	1
OGG1-16	18	1	7	3	0	1	2	1	0	2	0	0	2	0	2	2	0	0	1	0	0	1	0	1	1	0	0	2	0	0	0	0	2	0	0	1	1	0	0	1	0	0
OGG2-130	18	1	5	3	1	3	1	0	0	1	0	0	1	0	0	1	0	0	1	0	1	4	0	0	2	0	0	1	0	0	0	0	1	1	0	0	1	0	0	1	0	0
OGG2-131	18	1	4	2	0	0	3	0	0	1	0	0	3	0	0	2	0	0	0	1	0	0	0	0	0	0	0	0	0	3	2	0	0	1	0	1	2	0	0	2	0	0
OGG2-132	18	1	3	1	1	0	3	0	0	2	0	0	2	0	0	3	0	0	0	0	3	3	0	0	3	0	0	1	0	0	0	0	0	0	0	0	0	0	0	0	0	0
OGG2-133	18	1	3	1	0	0	2	0	0	1	0	0	1	0	0	1	0	1	2	0	1	5	1	0	1	0	0	1	0	0	1	0	0	0	0	1	1	0	0	1	0	0
OGG2-134	18	0	18	7	0	5	0	0	0	1	0	0	1	0	6	1	0	0	2	0	4	2	0	1	3	0	0	0	0	0	0	0	1	0	0	0	1	0	0	0	0	1
OGG2-135	18	0	17	2	0	2	1	0	0	3	0	0	2	0	6	3	0	0	4	0	9	2	0	0	1	0	0	0	0	0	0	0	0	0	0	0	0	0	0	0	0	0
OGG2-136	18	0	13	2	0	3	2	0	1	1	0	0	1	0	3	2	0	2	2	0	3	2	0	0	2	0	1	1	0	0	1	0	0	0	0	0	1	0	0	1	0	0
OGG2-137	18	0	7	2	0	1	2	0	0	1	0	0	2	0	4	2	0	0	2	0	0	2	0	0	2	0	0	1	0	0	1	0	0	0	0	1	0	0	1	1	0	0
OGG2-138	17	2	44	7	2	32	3	0	3	3	0	0	0	0	3	2	0	0	0	0	5	0	0	0	0	0	0	1	0	0	0	0	0	0	0	0	1	0	0	0	0	1
OGG2-139	17	2	8	2	0	1	1	0	0	1	0	0	4	0	6	2	0	0	1	0	0	1	0	0	1	0	0	1	0	0	1	2	0	0	0	1	1	0	0	1	0	0
OGG2-140	17	1	27	1	0	0	2	1	7	1	0	4	0	0	6	3	0	0	1	0	2	5	0	4	3	0	0	1	0	0	0	0	1	0	0	2	0	0	0	0	0	1
OGG2-141	17	1	19	0	0	4	0	0	1	0	0	0	2	0	8	2	0	0	0	0	0	6	1	3	7	0	3	0	0	0	0	0	0	0	0	0	0	0	0	0	0	0
OGG2-142	17	1	18	8	0	4	3	0	9	1	0	0	0	0	1	0	0	0	0	0	0	0	0	0	0	0	0	0	1	3	2	0	0	0	0	0	2	0	0	1	0	1
OGG2-143	17	1	16	10	0	10	3	0	0	0	0	0	0	0	0	0	0	0	1	0	4	0	0	0	0	0	0	0	0	0	0	0	0	1	0	0	0	1	2	2	0	0
OGG2-144	17	1	15	3	0	0	2	1	0	2	0	1	2	0	5	1	0	0	1	0	1	1	0	0	1	0	1	1	0	0	0	0	3	1	0	2	1	0	1	1	0	1
OGG2-145	17	0	42	0	0	7	2	0	0	1	0	0	1	0	5	0	0	1	2	0	7	5	0	17	6	0	0	0	0	1	0	0	1	0	0	1	0	0	1	0	0	1
OGG2-146	17	0	33	3	0	0	1	0	10	2	0	0	3	0	1	1	0	0	1	0	9	2	0	0	2	0	0	1	0	1	0	0	2	0	0	2	1	0	5	0	0	3
OGG2-147	17	0	27	0	0	3	1	0	4	2	0	0	2	0	8	2	0	0	1	0	9	2	0	0	2	0	0	2	0	0	1	0	1	0	0	0	1	0	1	1	0	1
OGG2-148	17	0	25	1	0	6	1	0	0	1	0	0	2	0	3	2	0	0	6	0	12	1	0	0	1	0	2	1	0	0	1	0	0	0	0	0	0	0	1	0	0	1
OGG2-149	17	0	18	1	0	1	1	0	1	1	0	1	5	0	2	1	0	0	1	0	4	3	0	0	3	0	0	1	0	2	0	0	2	0	0	2	0	0	2	0	0	1
OGG2-150	17	0	16	12	0	5	0	0	1	0	0	1	1	0	3	1	0	0	0	0	1	0	0	1	0	0	0	0	0	2	1	0	0	1	0	1	1	0	0	0	0	1
OGG1-17	17	0	16	1	0	0	1	0	0	1	0	0	1	0	0	1	0	1	4	0	12	3	0	1	2	0	2	2	0	0	1	0	0	0	0	0	0	0	0	0	0	0
OGG2-151	17	0	10	2	0	1	1	0	1	1	0	0	1	0	3	1	0	0	0	0	0	2	0	0	3	0	0	1	0	0	1	0	0	2	0	1	1	0	2	1	0	2
OGG1-18	17	0	8	5	0	3	1	0	1	2	0	0	1	0	0	1	0	0	0	0	0	3	0	0	2	0	1	0	0	0	0	0	0	0	0	2	1	0	0	1	0	1
OGG1-19	17	0	8	3	0	5	0	0	1	3	0	0	0	0	0	0	0	0	0	0	0	2	0	0	2	0	1	3	0	0	0	0	1	0	0	0	2	0	0	2	0	0
OGG1-20	17	0	6	2	0	0	2	0	0	1	0	0	0	0	0	1	0	0	1	0	2	4	0	2	3	0	0	1	0	0	0	0	1	0	0	1	1	0	0	1	0	0
OGG2-152	17	0	6	1	0	1	6	0	2	1	0	0	1	0	1	1	0	1	2	0	0	1	0	0	1	0	0	0	0	0	0	0	1	1	0	0	1	0	0	1	0	0
OGG2-153	16	2	12	0	1	1	1	0	11	1	0	0	3	1	0	2	0	0	2	0	0	1	0	0	2	0	0	1	0	0	1	0	0	0	0	0	1	0	0	1	0	0
OGG2-154	16	1	21	1	0	1	3	0	3	4	0	0	1	0	4	0	0	0	0	0	1	1	0	1	2	0	0	1	0	2	1	0	1	0	1	4	1	0	2	1	0	2
OGG1-21	16	1	15	1	0	3	1	0	4	3	0	1	1	0	1	1	0	1	1	0	1	2	0	2	2	0	2	0	1	0	1	0	0	1	0	0	1	0	0	1	0	0
OGG1-22	16	1	9	1	0	0	2	0	0	1	0	1	2	0	0	1	0	0	2	0	1	2	1	0	3	0	0	1	0	0	0	0	2	0	0	2	0	0	2	1	0	1
OGG2-155	16	0	36	1	0	4	2	0	0	1	0	0	1	0	23	3	0	0	2	0	5	0	0	2	2	0	0	0	0	0	1	0	1	1	0	0	1	0	1	1	0	0
OGG2-156	16	0	28	0	0	16	0	0	6	1	0	0	1	0	1	5	0	0	2	0	2	2	0	0	1	0	1	1	0	0	1	0	0	0	0	0	1	0	1	1	0	1
OGG1-23	16	0	22	3	0	5	6	0	1	1	0	1	1	0	3	1	0	0	1	0	7	1	0	0	0	0	2	1	0	0	0	0	2	0	0	0	1	0	0	0	0	1
OGG2-157	16	0	21	4	0	3	4	0	10	4	0	3	4	0	5	0	0	0	0	0	0	0	0	0	0	0	0	0	0	0	0	0	0	0	0	0	0	0	0	0	0	0
OGG2-158	16	0	18	4	0	6	1	0	0	1	0	0	1	0	7	0	0	1	2	0	3	1	0	0	2	0	0	1	0	0	1	0	1	0	0	0	1	0	0	1	0	0
OGG1-24	16	0	15	7	0	3	0	0	2	1	0	0	1	0	0	1	0	0	2	0	8	1	0	0	2	0	0	1	0	2	0	0	0	0	0	0	0	0	0	0	0	0
OGG2-159	16	0	15	0	0	3	0	0	2	0	0	1	1	0	2	4	0	4	2	0	2	4	0	0	2	0	0	1	0	0	0	0	0	1	0	0	1	0	0	0	0	1
OGG2-160	16	0	13	5	0	6	2	0	0	2	0	2	3	0	2	0	0	1	2	0	1	1	0	1	1	0	0	0	0	0	0	0	0	0	0	0	0	0	0	0	0	0
OGG1-25	16	0	13	2	0	3	4	0	1	2	0	1	2	0	0	0	0	0	2	0	6	2	0	0	2	0	1	0	0	0	0	0	1	0	0	0	0	0	0	0	0	0
OGG2-161	16	0	10	12	0	3	0	0	2	0	0	1	0	0	3	0	0	0	0	0	0	1	0	0	1	0	0	0	0	0	1	0	0	0	0	0	1	0	0	0	0	1
OGG2-162	16	0	9	2	0	1	1	0	0	1	0	0	3	0	7	1	0	1	1	0	0	1	0	0	1	0	0	1	0	0	1	0	0	1	0	0	1	0	0	1	0	0
OGG2-163	16	0	9	1	0	2	3	0	0	0	0	0	3	0	2	1	0	0	2	0	2	2	0	0	3	0	0	1	0	0	0	0	0	0	0	1	0	0	1	0	0	1
OGG2-164	16	0	8	5	0	2	1	0	0	0	0	0	2	0	2	1	0	0	1	0	0	0	0	3	2	0	0	1	0	0	0	0	1	1	0	0	1	0	0	1	0	0
OGG2-165	16	0	8	0	0	0	2	0	2	1	0	0	3	0	0	7	0	1	1	0	1	1	0	0	1	0	0	0	0	1	0	0	0	0	0	1	0	0	1	0	0	1
OGG2-166	16	0	7	2	0	2	1	0	0	2	0	1	2	0	1	2	0	0	1	0	1	2	0	0	2	0	0	0	0	1	0	0	1	1	0	0	0	0	0	1	0	0
OGG2-167	16	0	7	2	0	0	1	0	1	0	0	0	10	0	4	1	0	0	1	0	0	1	0	1	0	0	1	0	0	0	0	0	0	0	0	0	0	0	0	0	0	0
OGG2-168	16	0	6	3	0	0	1	0	0	1	0	0	0	0	1	2	0	0	0	0	2	0	0	0	2	0	0	0	0	2	2	0	0	2	0	0	1	0	1	2	0	0
OGG1-26	16	0	5	1	0	0	7	0	0	1	0	2	1	0	0	1	0	0	0	0	1	1	0	0	0	0	1	1	0	0	0	0	1	1	0	0	1	0	0	1	0	0
OGG2-169	16	0	5	1	0	0	1	0	0	0	0	0	1	0	0	1	0	0	9	0	2	1	0	0	1	0	0	0	0	0	0	0	0	0	0	2	0	0	1	1	0	0
OGG2-170	16	0	4	1	0	2	1	0	0	1	0	0	2	0	0	3	0	0	2	0	0	2	0	1	3	0	0	1	0	0	0	0	1	0	0	0	0	0	0	0	0	0
OGG2-171	16	0	4	1	0	0	0	0	0	1	0	0	1	0	0	0	0	0	5	0	1	4	0	1	3	0	2	1	0	0	0	0	0	0	0	0	0	0	0	0	0	0
OGG2-172	16	0	2	1	0	0	6	0	0	1	0	0	0	0	1	1	0	0	1	0	0	1	0	0	1	0	0	1	0	0	1	0	0	1	0	0	0	0	1	1	0	0
OGG1-27	16	0	2	1	0	0	4	0	0	1	0	0	1	0	0	0	0	1	2	0	1	1	0	0	1	0	0	1	0	0	1	0	0	1	0	0	1	0	0	1	0	0
OGG2-173	16	0	0	2	0	0	1	0	0	0	0	0	1	0	0	1	0	0	1	0	0	2	0	0	2	0	0	1	0	0	1	0	0	2	0	0	1	0	0	1	0	0
OGG2-174	15	3	25	2	0	7	2	0	1	2	0	0	2	0	7	3	0	1	0	2	5	1	1	0	2	0	0	0	0	1	0	0	1	0	0	1	1	0	0	0	0	1
OGG2-175	15	3	12	2	0	2	3	0	4	2	0	0	2	2	3	1	0	0	0	0	0	1	1	1	1	0	0	1	0	0	0	0	1	0	0	1	1	0	0	1	0	0
OGG1-28	15	2	5	1	0	1	5	0	0	3	0	0	1	0	0	1	0	0	0	0	2	1	0	0	1	0	0	0	2	0	1	0	0	1	0	0	0	0	1	0	0	1
OGG2-176	15	2	1	2	0	0	6	0	0	0	0	0	0	0	0	1	0	0	1	0	0	1	0	0	1	0	0	1	0	0	0	0	1	0	2	0	1	0	0	1	0	0
OGG2-177	15	1	11	1	0	6	1	0	0	1	0	0	1	0	4	3	1	0	1	0	1	1	0	0	1	0	0	1	0	0	1	0	0	1	0	0	1	0	0	1	0	0
OGG1-29	15	1	9	0	0	0	9	0	2	1	0	2	0	0	0	0	0	0	0	0	3	0	0	0	0	0	0	0	0	1	1	0	1	1	1	0	1	0	0	2	0	0
OGG2-178	15	1	8	4	0	1	2	0	0	1	0	1	3	0	1	0	0	1	0	0	1	0	0	0	0	0	0	1	0	0	1	0	0	3	1	0	0	0	1	0	0	2
OGG2-179	15	1	6	1	0	1	3	0	0	1	0	0	1	0	4	2	0	0	1	0	0	1	0	0	1	0	0	1	0	0	0	1	0	1	0	1	1	0	0	1	0	0
OGG2-180	15	1	4	1	0	3	1	0	0	1	0	0	2	0	1	1	0	0	1	0	0	1	0	0	1	0	0	1	0	0	1	0	0	2	1	0	1	0	0	1	0	0
OGG1-30	15	1	3	3	1	0	1	0	1	7	0	0	1	0	0	0	0	0	0	0	0	1	0	1	2	0	0	0	0	0	0	0	1	0	0	0	0	0	0	0	0	0
OGG1-31	15	1	1	1	0	0	4	0	0	1	0	0	2	0	0	0	1	0	1	0	0	1	0	0	1	0	0	1	0	0	0	0	1	1	0	0	1	0	0	1	0	0
OGG2-181	15	0	22	10	0	7	0	0	5	1	0	0	0	0	4	0	0	0	1	0	5	1	0	1	2	0	0	0	0	0	0	0	0	0	0	0	0	0	0	0	0	0
OGG2-182	15	0	18	1	0	1	0	0	3	3	0	2	1	0	0	1	0	0	0	0	5	5	0	4	2	0	1	0	0	1	0	0	0	0	0	1	1	0	0	1	0	0
OGG2-183	15	0	15	1	0	4	2	0	2	2	0	0	1	0	1	2	0	0	1	0	3	1	0	1	2	0	0	1	0	1	0	0	0	0	0	0	1	0	1	1	0	2
OGG2-184	15	0	14	0	0	2	2	0	1	2	0	1	2	0	0	2	0	1	2	0	1	0	0	1	1	0	1	0	0	2	1	0	1	2	0	0	1	0	1	0	0	2
OGG2-185	15	0	12	4	0	0	1	0	1	1	0	0	0	0	0	0	0	0	0	0	5	0	0	0	0	0	0	0	0	0	1	0	0	0	0	4	4	0	1	4	0	1
OGG2-186	15	0	12	1	0	0	1	0	0	1	0	0	1	0	0	1	0	0	0	0	1	3	0	1	3	0	2	1	0	7	1	0	0	0	0	1	1	0	0	1	0	0
OGG2-187	15	0	11	4	0	5	0	0	0	1	0	0	5	0	0	2	0	0	1	0	1	1	0	0	1	0	0	0	0	1	0	0	0	0	0	2	0	0	1	0	0	1
OGG1-32	15	0	9	2	0	0	3	0	2	1	0	0	1	0	1	1	0	0	3	0	6	1	0	0	2	0	0	0	0	0	1	0	0	0	0	0	0	0	0	0	0	0
OGG2-188	15	0	8	2	0	0	0	0	1	3	0	1	2	0	1	1	0	0	1	0	4	2	0	1	1	0	0	0	0	0	1	0	0	1	0	0	0	0	0	1	0	0
OGG2-189	15	0	8	0	0	0	0	0	0	0	0	0	0	0	0	0	0	0	1	0	3	6	0	2	5	0	1	0	0	1	1	0	0	1	0	0	0	0	1	1	0	0
OGG2-190	15	0	5	5	0	3	1	0	0	1	0	0	1	0	0	0	0	1	1	0	0	1	0	0	1	0	0	1	0	0	0	0	1	1	0	0	1	0	0	1	0	0
OGG2-191	15	0	5	2	0	0	2	0	1	1	0	0	2	0	1	1	0	0	1	0	2	1	0	0	1	0	1	1	0	0	1	0	0	0	0	0	1	0	0	1	0	0
OGG1-33	15	0	4	1	0	2	2	0	0	4	0	0	2	0	0	0	0	1	0	0	0	1	0	0	1	0	0	1	0	0	0	0	1	1	0	0	1	0	0	1	0	0
OGG1-34	15	0	4	1	0	0	4	0	0	1	0	0	1	0	0	1	0	0	1	0	3	1	0	0	1	0	0	1	0	0	1	0	0	1	0	0	0	0	1	1	0	0
OGG2-192	15	0	2	1	0	0	1	0	0	1	0	0	2	0	0	1	0	0	2	0	0	2	0	0	2	0	0	1	0	0	1	0	0	1	0	0	0	0	1	0	0	1
OGG1-35	15	0	1	1	0	1	2	0	0	1	0	0	1	0	0	1	0	0	4	0	0	1	0	0	1	0	0	1	0	0	1	0	0	1	0	0	0	0	0	0	0	0
OGG1-36	15	0	1	1	0	0	2	0	0	2	0	0	2	0	0	1	0	0	1	0	0	1	0	0	1	0	0	1	0	0	0	0	1	1	0	0	1	0	0	1	0	0
OGG2-193	14	1	28	6	1	16	3	0	1	1	0	0	0	0	10	0	0	0	0	0	0	3	0	1	1	0	0	0	0	0	0	0	0	0	0	0	0	0	0	0	0	0
OGG2-194	14	1	18	4	1	7	1	0	1	0	0	0	1	0	0	2	0	0	1	0	7	3	0	3	2	0	0	0	0	0	0	0	0	0	0	0	0	0	0	0	0	0
OGG2-195	14	1	14	8	1	10	0	0	0	0	0	0	0	0	2	1	0	0	2	0	2	0	0	0	0	0	0	1	0	0	1	0	0	0	0	0	1	0	0	0	0	0
OGG1-37	14	1	12	1	0	0	7	1	0	0	0	1	1	0	0	1	0	0	1	0	4	0	0	3	1	0	1	1	0	0	0	0	1	0	0	1	1	0	0	0	0	1
OGG2-196	14	1	10	0	0	5	6	0	1	1	0	0	7	0	1	0	0	1	0	0	0	0	0	0	0	0	0	0	0	0	0	0	0	0	1	1	0	0	0	0	0	1
OGG2-197	14	1	7	13	1	7	1	0	0	0	0	0	0	0	0	0	0	0	0	0	0	0	0	0	0	0	0	0	0	0	0	0	0	0	0	0	0	0	0	0	0	0
OGG2-198	14	1	7	2	0	0	1	0	1	3	0	0	1	0	0	0	0	0	0	0	0	4	0	4	2	0	0	0	0	1	0	0	0	1	0	0	0	1	1	0	0	0
OGG2-199	14	1	7	0	0	2	1	0	0	1	0	0	1	0	0	2	0	0	2	0	4	1	0	0	1	0	0	1	1	0	1	0	0	1	0	0	1	0	1	1	0	0
OGG2-200	14	0	32	6	0	20	0	0	1	0	0	0	4	0	3	1	0	1	1	0	7	1	0	0	1	0	0	0	0	0	0	0	0	0	0	0	0	0	0	0	0	0
OGG2-201	14	0	26	5	0	5	2	0	2	1	0	2	1	0	1	1	0	2	2	0	2	1	0	1	1	0	0	0	0	0	0	0	3	0	0	3	0	0	3	0	0	2
OGG2-202	14	0	16	1	0	4	1	0	5	3	0	0	1	0	5	0	0	0	1	0	0	1	0	0	1	0	0	0	0	0	1	0	0	0	0	2	2	0	0	2	0	0
OGG2-203	14	0	15	1	0	1	1	0	0	1	0	1	1	0	1	1	0	2	3	0	0	2	0	1	2	0	0	1	0	2	0	0	2	1	0	1	0	0	2	0	0	2
OGG2-204	14	0	14	7	0	7	2	0	0	1	0	2	1	0	2	0	0	1	0	0	1	1	0	0	1	0	0	0	0	0	0	0	0	1	0	1	0	0	0	0	0	0
OGG2-205	14	0	13	2	0	9	0	0	3	0	0	0	1	0	1	1	0	0	3	0	0	2	0	0	2	0	0	1	0	0	0	0	0	1	0	0	0	0	0	1	0	0
OGG2-206	14	0	12	4	0	6	1	0	5	2	0	0	1	0	0	1	0	0	0	0	0	1	0	0	1	0	0	1	0	0	1	0	0	0	0	0	0	0	1	1	0	0
OGG1-38	14	0	12	1	0	3	2	0	0	1	0	2	2	0	2	1	0	0	1	0	0	3	0	0	2	0	1	1	0	0	0	0	1	0	0	1	0	0	1	0	0	1
OGG2-207	14	0	11	3	0	6	1	0	2	1	0	0	1	0	2	1	0	0	1	0	0	1	0	1	1	0	0	1	0	0	1	0	0	0	0	0	1	0	0	1	0	0
OGG2-208	14	0	10	3	0	5	1	0	0	2	0	0	0	0	2	6	0	3	2	0	0	0	0	0	0	0	0	0	0	0	0	0	0	0	0	0	0	0	0	0	0	0
OGG2-209	14	0	10	1	0	1	2	0	0	2	0	0	2	0	5	0	0	1	1	0	1	2	0	1	2	0	0	1	0	0	1	0	1	0	0	0	0	0	0	0	0	0
OGG2-210	14	0	7	2	0	3	1	0	0	0	0	0	1	0	0	0	0	0	4	0	2	4	0	2	2	0	0	0	0	0	0	0	0	0	0	0	0	0	0	0	0	0
OGG1-39	14	0	7	1	0	0	3	0	2	1	0	0	1	0	0	1	0	0	1	0	4	1	0	0	1	0	0	1	0	0	1	0	0	1	0	0	1	0	0	0	0	1
OGG2-211	14	0	6	0	0	1	1	0	0	1	0	0	1	0	2	1	0	0	4	0	2	1	0	0	1	0	0	1	0	0	2	0	0	0	0	0	0	0	1	1	0	0
OGG2-212	14	0	3	1	0	0	3	0	0	1	0	0	1	0	0	1	0	1	1	0	0	1	0	0	1	0	0	0	0	2	1	0	0	1	0	0	1	0	0	1	0	0
OGG2-213	14	0	3	1	0	0	1	0	0	1	0	0	2	0	0	2	0	1	1	0	1	1	0	0	1	0	0	1	0	0	1	0	0	0	0	1	1	0	0	1	0	0
OGG2-214	14	0	2	2	0	0	2	0	0	1	0	0	1	0	0	1	0	0	1	0	0	1	0	1	2	0	0	1	0	0	1	0	0	0	0	0	0	0	1	1	0	0
OGG2-215	14	0	2	2	0	0	1	0	0	1	0	0	1	0	1	1	0	0	1	0	0	1	0	0	1	0	0	1	0	1	1	0	0	1	0	0	1	0	0	1	0	0
OGG2-216	14	0	2	1	0	0	1	0	0	1	0	0	1	0	0	1	0	0	0	0	2	1	0	0	1	0	0	1	0	0	1	0	0	3	0	0	0	0	0	2	0	0
OGG2-217	14	0	1	1	0	0	2	0	0	2	0	0	2	0	1	1	0	0	1	0	0	0	0	0	0	0	0	1	0	0	1	0	0	1	0	0	1	0	0	1	0	0
OGG2-218	14	0	1	1	0	0	1	0	0	1	0	0	1	0	0	1	0	0	3	0	0	1	0	0	1	0	0	1	0	0	1	0	0	1	0	0	0	0	1	1	0	0
OGG2-219	14	0	0	3	0	0	1	0	0	0	0	0	2	0	0	0	0	0	2	0	0	1	0	0	1	0	0	1	0	0	0	0	0	1	0	0	1	0	0	1	0	0
OGG2-220	13	2	19	1	0	1	5	1	7	1	0	2	2	0	2	1	0	0	0	1	1	1	0	3	1	0	0	0	0	1	1	0	0	0	0	1	0	0	0	0	0	1
OGG2-221	13	1	43	1	0	25	1	0	8	2	1	0	1	0	4	1	0	0	1	0	2	2	0	3	1	0	0	1	0	0	0	0	1	1	0	0	0	0	0	1	0	0
OGG2-222	13	1	13	4	1	5	2	0	0	1	0	1	2	0	0	1	0	1	2	0	1	1	0	1	0	0	3	0	0	0	0	0	1	0	0	0	0	0	0	0	0	0
OGG2-223	13	1	11	2	0	2	1	0	1	1	0	0	2	0	2	1	0	0	0	0	2	1	1	0	2	0	0	2	0	0	0	0	1	0	0	0	0	0	2	1	0	1
OGG2-224	13	1	9	1	1	3	0	0	1	2	0	0	1	0	2	2	0	0	0	0	0	1	0	1	1	0	0	1	0	0	1	0	0	1	0	1	1	0	1	1	0	0
OGG2-225	13	1	9	1	0	2	1	0	0	1	0	0	2	0	0	1	0	0	1	0	4	1	0	0	1	0	0	1	0	0	0	0	0	0	0	3	1	1	0	2	0	0
OGG2-226	13	1	6	7	0	2	1	0	0	0	0	1	0	0	1	1	0	0	1	0	0	0	0	1	1	0	0	0	1	0	0	0	0	1	0	0	0	0	1	1	0	0
OGG2-227	13	1	6	1	0	0	1	0	0	3	0	2	1	0	1	0	0	1	0	1	1	2	0	0	1	0	0	1	0	0	1	0	0	0	0	1	1	0	0	1	0	0
OGG2-228	13	1	5	4	1	2	3	0	0	1	0	0	3	0	1	1	0	0	0	0	0	0	0	0	1	0	0	0	0	0	0	0	0	0	0	1	0	0	0	0	0	1
OGG2-229	13	1	4	1	0	1	2	0	0	1	0	0	1	0	1	2	0	0	3	0	0	1	1	0	2	0	0	0	0	0	0	0	1	0	0	1	0	0	0	0	0	0
OGG2-230	13	1	2	1	0	0	1	0	0	1	0	0	1	0	1	1	0	0	1	0	0	1	0	0	1	0	0	1	0	0	1	0	1	1	1	0	1	0	0	1	0	0
OGG2-231	13	1	1	1	0	0	1	0	0	0	0	0	1	0	1	1	0	0	1	0	0	1	0	0	1	0	0	1	1	0	1	0	0	2	0	0	1	0	0	1	0	0
OGG2-232	13	1	0	1	0	0	1	0	0	1	0	0	1	0	0	1	0	0	1	0	0	1	0	0	1	0	0	1	0	0	1	0	0	1	1	0	1	0	0	1	0	0
OGG2-233	13	0	19	8	0	8	0	0	0	0	0	1	0	0	3	0	0	0	2	0	6	0	0	0	0	0	0	0	0	0	0	0	0	1	0	1	1	0	0	1	0	0
OGG2-234	13	0	18	0	0	4	0	0	4	1	0	1	2	0	4	1	0	0	2	0	5	1	0	0	2	0	0	1	0	0	1	0	0	0	0	0	1	0	0	1	0	0
OGG2-235	13	0	14	4	0	1	0	0	1	0	0	0	2	0	1	1	0	0	0	0	2	1	0	9	2	0	0	0	0	0	1	0	0	1	0	0	0	0	0	1	0	0
OGG2-236	13	0	14	3	0	0	2	0	1	1	0	2	1	0	2	0	0	0	1	0	1	2	0	0	1	0	0	1	0	1	1	0	1	0	0	2	0	0	2	0	0	2
OGG2-237	13	0	13	11	0	9	0	0	1	0	0	0	1	0	1	1	0	0	0	0	2	0	0	0	0	0	0	0	0	0	0	0	0	0	0	0	0	0	0	0	0	0
OGG1-40	13	0	9	1	0	0	3	0	1	0	0	1	1	0	0	1	0	0	0	0	5	2	0	0	1	0	0	1	0	1	0	0	1	1	0	0	1	0	0	1	0	0
OGG2-238	13	0	8	4	0	4	1	0	0	1	0	0	1	0	2	1	0	0	0	0	1	1	0	0	1	0	0	1	0	0	0	0	1	0	0	0	1	0	0	1	0	0
OGG2-239	13	0	8	3	0	1	2	0	0	3	0	0	2	0	0	1	0	0	1	0	0	0	0	0	0	0	0	1	0	0	0	0	3	0	0	2	0	0	1	0	0	1
OGG2-240	13	0	8	2	0	1	2	0	0	1	0	2	1	0	1	1	0	0	1	0	1	1	0	0	2	0	0	0	0	1	0	0	1	1	0	0	0	0	1	1	0	0
OGG2-241	13	0	8	1	0	5	0	0	0	1	0	0	0	0	2	0	0	1	1	0	0	3	0	0	3	0	0	0	0	0	1	0	0	1	0	0	1	0	0	1	0	0
OGG1-41	13	0	8	1	0	1	0	0	1	1	0	0	1	0	1	1	0	0	1	0	1	2	0	1	2	0	0	1	0	1	0	0	1	1	0	0	1	0	1	1	0	0
OGG1-42	13	0	8	1	0	0	2	0	2	1	0	0	1	0	2	1	0	0	2	0	2	1	0	0	0	0	1	1	0	0	0	0	1	1	0	0	1	0	0	1	0	0
OGG2-242	13	0	8	1	0	0	1	0	0	1	0	1	1	0	3	1	0	0	1	0	4	1	0	0	1	0	0	1	0	0	0	0	0	1	0	0	2	0	0	1	0	0
OGG1-43	13	0	7	2	0	2	2	0	2	1	0	1	0	0	0	1	0	0	2	0	0	2	0	0	0	0	1	0	0	0	0	0	1	1	0	0	1	0	0	1	0	0
OGG2-243	13	0	6	1	0	4	1	0	0	1	0	0	3	0	0	1	0	0	1	0	0	1	0	0	1	0	0	1	0	0	0	0	1	0	0	1	1	0	0	1	0	0
OGG2-244	13	0	5	1	0	1	2	0	0	1	0	0	2	0	0	2	0	0	2	0	0	1	0	1	1	0	1	1	0	0	0	0	2	0	0	0	0	0	0	0	0	0
OGG2-245	13	0	4	1	0	0	1	0	0	1	0	0	1	0	2	2	0	0	1	0	1	1	0	0	1	0	0	1	0	0	1	0	0	0	0	1	1	0	0	1	0	0
OGG2-246	13	0	3	2	0	0	1	0	0	1	0	0	1	0	1	1	0	0	0	0	1	1	0	0	1	0	0	1	0	0	1	0	0	1	0	1	1	0	0	1	0	0
OGG2-247	13	0	3	1	0	1	1	0	0	0	0	0	4	0	1	1	0	0	1	0	0	1	0	0	1	0	0	0	0	0	1	0	0	1	0	0	0	0	1	1	0	0
OGG2-248	13	0	2	1	0	0	1	0	0	1	0	0	1	0	0	1	0	1	1	0	0	1	0	0	1	0	0	1	0	0	1	0	0	1	0	1	1	0	0	1	0	0
OGG2-249	13	0	2	1	0	0	1	0	0	1	0	0	1	0	0	1	0	0	1	0	0	2	0	0	2	0	0	1	0	0	0	0	1	1	0	0	1	0	0	0	0	1
OGG2-250	13	0	2	1	0	0	1	0	0	0	0	0	1	0	1	1	0	0	1	0	0	4	0	0	3	0	1	1	0	0	0	0	0	0	0	0	0	0	0	0	0	0
OGG2-251	13	0	2	0	0	0	0	0	1	2	0	0	4	0	0	0	0	0	1	0	0	1	0	0	1	0	0	0	0	1	1	0	0	1	0	0	1	0	0	1	0	0
OGG2-252	13	0	1	2	0	1	2	0	0	0	0	0	2	0	0	0	0	0	0	0	0	1	0	0	2	0	0	0	0	0	1	0	0	1	0	0	1	0	0	1	0	0
OGG2-253	13	0	1	2	0	0	2	0	0	0	0	0	0	0	0	0	0	0	1	0	0	3	0	0	1	0	0	0	0	1	1	0	0	1	0	0	1	0	0	1	0	0
OGG2-254	13	0	1	1	0	0	1	0	0	1	0	0	1	0	0	1	0	1	1	0	0	1	0	0	1	0	0	1	0	0	1	0	0	1	0	0	1	0	0	1	0	0
OGG2-255	13	0	1	1	0	0	1	0	0	1	0	0	1	0	0	1	0	0	1	0	0	1	0	0	1	0	0	1	0	0	1	0	0	1	0	1	1	0	0	1	0	0
OGG1-44	13	0	0	1	0	0	1	0	0	1	0	0	1	0	0	1	0	0	1	0	0	1	0	0	1	0	0	1	0	0	1	0	0	1	0	0	1	0	0	1	0	0
OGG1-45	13	0	0	1	0	0	1	0	0	1	0	0	1	0	0	1	0	0	1	0	0	1	0	0	1	0	0	1	0	0	1	0	0	1	0	0	1	0	0	1	0	0
OGG2-256	13	0	0	1	0	0	1	0	0	1	0	0	1	0	0	1	0	0	1	0	0	1	0	0	1	0	0	1	0	0	1	0	0	1	0	0	1	0	0	1	0	0
OGG2-257	12	2	12	0	0	3	2	0	0	1	0	0	2	0	0	1	1	1	1	1	2	2	0	1	1	0	2	0	0	1	1	0	0	1	0	0	0	0	1	0	0	1
OGG2-258	12	2	3	2	0	2	1	0	0	1	0	0	2	0	0	1	0	0	0	0	0	1	0	0	1	0	0	0	0	0	0	1	0	1	1	1	1	0	0	1	0	0
OGG1-46	12	1	27	3	1	2	0	0	7	1	0	0	1	0	3	1	0	0	1	0	11	2	0	0	2	0	0	1	0	0	0	0	1	0	0	1	0	0	1	0	0	1
OGG2-259	12	1	15	1	0	1	2	0	3	1	0	0	4	0	3	0	0	0	0	0	0	0	0	0	0	0	0	1	1	2	1	0	1	1	0	2	1	0	1	0	0	2
OGG2-260	12	1	10	1	1	0	2	0	0	1	0	1	1	0	2	0	0	0	0	0	0	0	0	0	0	0	0	0	0	0	1	0	0	0	0	0	2	0	2	4	0	5
OGG1-47	12	1	9	1	1	2	2	0	2	1	0	1	1	0	2	1	0	0	0	0	0	2	0	0	2	0	0	0	0	1	0	0	1	0	0	0	1	0	0	1	0	0
OGG2-261	12	1	7	4	0	2	0	1	0	1	0	0	1	0	0	1	0	0	0	0	4	0	0	1	2	0	0	0	0	0	0	0	0	1	0	0	1	0	0	1	0	0
OGG2-262	12	1	6	4	1	1	0	0	1	3	0	1	2	0	2	1	0	0	1	0	1	1	0	0	0	0	0	0	0	0	0	0	0	0	0	0	0	0	0	0	0	0
OGG1-48	12	1	6	1	1	2	2	0	0	0	0	1	1	0	1	3	0	0	2	0	0	1	0	0	2	0	0	0	0	0	0	0	1	0	0	1	0	0	0	0	0	0
OGG2-263	12	1	4	1	0	1	1	0	1	1	0	0	1	0	1	0	1	0	0	0	0	2	0	0	2	0	0	1	0	0	1	0	0	1	0	0	0	0	1	1	0	0
OGG2-264	12	1	1	1	0	0	1	0	0	1	0	0	1	0	0	1	0	0	0	0	1	1	0	0	1	0	0	1	0	0	1	0	0	1	1	0	1	0	0	1	0	0
OGG2-265	12	0	38	1	0	5	1	0	6	1	0	0	3	0	13	1	0	0	0	0	8	1	0	3	3	0	0	1	0	0	0	0	1	0	0	0	0	0	1	0	0	1
OGG2-266	12	0	19	2	0	1	1	0	1	1	0	0	2	0	9	0	0	2	2	0	4	0	0	0	0	0	0	1	0	0	0	0	1	1	0	1	1	0	0	1	0	0
OGG2-267	12	0	14	8	0	12	0	0	0	0	0	0	0	0	1	1	0	0	0	0	0	2	0	1	1	0	0	0	0	0	0	0	0	0	0	0	0	0	0	0	0	0
OGG2-268	12	0	14	3	0	8	1	0	1	0	0	0	2	0	5	1	0	0	1	0	0	2	0	0	2	0	0	0	0	0	0	0	0	0	0	0	0	0	0	0	0	0
OGG1-49	12	0	13	4	0	7	2	0	0	1	0	0	1	0	0	1	0	0	1	0	3	1	0	2	1	0	0	0	0	1	0	0	0	0	0	0	0	0	0	0	0	0
OGG2-269	12	0	12	0	0	5	1	0	2	1	0	0	1	0	1	1	0	1	1	0	2	1	0	0	2	0	1	2	0	0	0	0	0	0	0	0	1	0	0	1	0	0
OGG2-270	12	0	11	1	0	0	2	0	0	1	0	0	1	0	2	1	0	0	0	0	2	0	0	0	0	0	0	0	0	2	0	0	0	2	0	2	1	0	1	3	0	2
OGG2-271	12	0	8	8	0	6	2	0	0	1	0	0	1	0	2	0	0	0	0	0	0	0	0	0	0	0	0	0	0	0	0	0	0	0	0	0	0	0	0	0	0	0
OGG2-272	12	0	8	1	0	0	2	0	0	2	0	0	1	0	1	1	0	0	0	0	0	1	0	0	1	0	0	1	0	1	1	0	1	1	0	1	0	0	2	0	0	2
OGG2-273	12	0	8	0	0	1	1	0	0	1	0	1	1	0	1	1	0	0	1	0	0	2	0	0	3	0	1	0	0	2	1	0	0	1	0	0	0	0	1	0	0	1
OGG2-274	12	0	7	1	0	0	1	0	0	1	0	0	2	0	4	1	0	0	1	0	1	1	0	0	1	0	0	0	0	1	1	0	0	0	0	1	1	0	0	1	0	0
OGG1-50	12	0	6	2	0	3	1	0	0	1	0	1	1	0	0	0	0	0	1	0	0	1	0	0	1	0	0	1	0	0	1	0	0	0	0	2	1	0	0	1	0	0
OGG2-275	12	0	6	1	0	0	1	0	0	1	0	0	2	0	1	1	0	1	1	0	1	1	0	3	0	0	0	1	0	0	0	0	0	1	0	0	1	0	0	1	0	0
OGG2-276	12	0	5	5	0	2	1	0	0	1	0	0	3	0	0	1	0	0	0	0	0	0	0	0	0	0	0	0	0	2	1	0	0	0	0	1	0	0	0	0	0	0
OGG2-277	12	0	5	4	0	1	0	0	1	1	0	0	1	0	1	1	0	0	0	0	0	1	0	1	1	0	0	1	0	0	1	0	0	0	0	0	1	0	0	0	0	1
OGG1-51	12	0	5	2	0	0	2	0	0	1	0	0	0	0	1	1	0	0	0	0	3	1	0	0	1	0	0	1	0	0	1	0	0	1	0	0	1	0	0	0	0	1
OGG2-278	12	0	5	1	0	0	2	0	2	1	0	0	0	0	1	1	0	0	1	0	0	1	0	0	1	0	0	1	0	0	1	0	0	1	0	1	0	0	0	1	0	1
OGG1-52	12	0	5	0	0	0	3	0	0	2	0	0	1	0	0	1	0	0	1	0	3	1	0	0	1	0	0	1	0	0	0	0	1	0	0	1	0	0	0	1	0	0
OGG2-279	12	0	4	2	0	1	1	0	0	1	0	0	1	0	0	1	0	0	0	0	0	1	0	0	1	0	0	1	0	0	1	0	0	1	0	2	0	0	1	1	0	0
OGG2-280	12	0	4	1	0	1	1	0	0	0	0	0	1	0	0	0	0	0	0	0	3	5	0	0	3	0	0	0	0	0	1	0	0	0	0	0	0	0	0	0	0	0
OGG1-53	12	0	4	1	0	0	2	0	0	4	0	0	1	0	0	1	0	0	1	0	0	1	0	0	1	0	0	0	0	0	0	0	1	0	0	1	0	0	1	0	0	1
OGG2-281	12	0	3	3	0	1	2	0	0	2	0	0	3	0	1	1	0	0	1	0	1	0	0	0	0	0	0	0	0	0	0	0	0	0	0	0	0	0	0	0	0	0
OGG2-282	12	0	3	3	0	0	3	0	0	2	0	0	2	0	0	0	0	0	0	0	0	0	0	0	0	0	0	2	0	0	0	0	0	0	0	1	0	0	1	0	0	1
OGG1-54	12	0	3	2	0	0	1	0	0	2	0	0	0	0	0	0	0	0	0	0	3	1	0	0	1	0	0	1	0	0	2	0	0	0	0	0	1	0	0	1	0	0
OGG1-55	12	0	3	1	0	2	1	0	0	1	0	0	1	0	0	1	0	0	1	0	0	1	0	0	1	0	0	1	0	0	1	0	0	1	0	0	1	0	0	0	0	1
OGG1-56	12	0	3	0	0	3	1	0	0	1	0	0	1	0	0	1	0	0	1	0	0	1	0	0	1	0	0	1	0	0	1	0	0	1	0	0	1	0	0	1	0	0
OGG2-283	12	0	2	3	0	0	1	0	0	1	0	0	1	0	1	2	0	0	1	0	0	1	0	0	1	0	0	1	0	0	0	0	1	0	0	0	0	0	0	0	0	0
OGG2-284	12	0	2	1	0	0	1	0	0	1	0	0	1	0	0	1	0	0	0	0	1	1	0	0	1	0	0	1	0	0	1	0	0	2	0	0	1	0	0	0	0	1
OGG2-285	12	0	2	0	0	1	2	0	0	1	0	0	1	0	0	1	0	0	1	0	0	1	0	0	1	0	0	1	0	0	1	0	0	0	0	1	1	0	0	1	0	0
OGG2-286	12	0	1	1	0	0	1	0	0	1	0	0	1	0	0	1	0	0	1	0	0	1	0	0	1	0	0	1	0	0	1	0	0	1	0	0	0	0	1	1	0	0
OGG2-287	12	0	1	1	0	0	0	0	1	1	0	0	1	0	0	1	0	0	1	0	0	1	0	0	1	0	0	1	0	0	1	0	0	1	0	0	1	0	0	1	0	0
OGG2-288	12	0	1	0	0	1	1	0	0	1	0	0	1	0	0	1	0	0	1	0	0	1	0	0	1	0	0	1	0	0	1	0	0	1	0	0	1	0	0	1	0	0
OGG2-289	12	0	0	2	0	0	0	0	0	1	0	0	1	0	0	0	0	0	1	0	0	1	0	0	1	0	0	1	0	0	1	0	0	1	0	0	1	0	0	1	0	0
OGG2-290	11	4	9	7	4	7	0	0	1	1	0	0	0	0	1	0	0	0	0	0	0	2	0	0	1	0	0	0	0	0	0	0	0	0	0	0	0	0	0	0	0	0
OGG2-291	11	3	19	2	0	11	2	2	0	0	0	0	0	0	0	1	1	0	2	0	6	2	0	0	2	0	0	0	0	0	0	0	0	0	0	1	0	0	0	0	0	1
OGG2-292	11	3	10	1	0	1	1	0	2	1	0	1	1	0	1	1	0	0	2	0	0	1	0	1	1	0	0	1	0	0	0	1	0	0	1	2	0	1	1	1	0	1
OGG1-57	11	2	5	2	0	2	2	0	0	1	0	0	1	0	0	2	0	0	1	2	2	1	0	0	1	0	1	0	0	0	0	0	0	0	0	0	0	0	0	0	0	0
OGG2-293	11	2	4	1	0	0	1	0	2	1	0	0	1	0	1	1	0	0	1	0	0	1	2	0	1	0	0	1	0	0	1	0	0	0	0	0	1	0	0	0	0	1
OGG2-294	11	1	14	2	0	0	1	0	0	1	0	0	0	0	10	2	0	0	0	0	1	0	0	0	0	0	0	1	0	0	0	1	1	1	0	1	1	0	1	2	0	0
OGG2-295	11	1	12	1	0	5	1	0	0	1	0	0	2	0	1	1	0	1	0	1	1	1	0	2	2	0	0	0	0	1	1	0	0	0	0	0	1	0	0	0	0	1
OGG2-296	11	1	11	3	0	0	0	0	3	1	0	1	1	0	5	1	0	0	2	0	2	1	1	0	2	0	0	0	0	0	0	0	0	0	0	0	0	0	0	0	0	0
OGG2-297	11	1	11	1	0	0	2	0	2	1	0	3	2	0	1	2	1	2	0	0	1	1	0	0	1	0	0	1	0	0	0	0	0	0	0	1	0	0	0	0	0	1
OGG2-298	11	1	10	2	0	1	3	0	1	1	0	1	2	0	1	0	0	1	1	0	1	0	1	0	1	0	0	1	0	0	0	0	1	0	0	1	0	0	1	0	0	1
OGG1-58	11	1	5	2	0	0	2	0	0	1	0	0	1	0	0	0	0	0	0	0	5	2	0	0	1	0	0	1	0	0	0	1	0	1	0	0	0	0	0	0	0	0
OGG2-299	11	1	4	3	0	1	0	0	0	0	0	0	3	0	1	1	0	0	0	0	1	0	0	0	0	0	0	0	0	0	1	0	0	1	1	1	1	0	0	1	0	0
OGG1-59	11	1	4	2	0	2	3	0	0	0	0	0	0	0	0	1	1	0	0	0	1	1	0	0	1	0	0	0	0	0	1	0	0	0	0	1	1	0	0	1	0	0
OGG2-300	11	1	3	1	0	0	1	0	0	1	0	0	1	0	1	1	0	0	1	0	0	1	0	0	1	0	0	1	0	0	0	0	1	0	1	1	1	0	0	1	0	0
OGG1-60	11	1	2	2	0	1	1	0	0	0	0	1	1	0	0	1	1	0	1	0	0	2	0	0	2	0	0	1	0	0	0	0	0	0	0	0	0	0	0	0	0	0
OGG2-301	11	1	2	1	0	0	1	0	0	1	0	0	1	0	0	2	0	0	1	0	0	1	0	0	1	0	0	1	0	0	0	0	1	0	0	1	0	1	0	1	0	0
OGG2-302	11	1	1	0	1	0	1	0	0	1	0	0	1	0	0	1	0	0	1	0	0	1	0	0	1	0	0	0	0	1	1	0	0	1	0	0	1	0	0	1	0	0
OGG2-303	11	1	0	4	0	0	2	0	0	0	1	0	3	0	0	1	0	0	0	0	0	0	0	0	1	0	0	0	0	0	0	0	0	0	0	0	0	0	0	0	0	0
OGG2-304	11	0	15	2	0	0	2	0	1	0	0	0	1	0	3	1	0	0	0	0	0	1	0	6	1	0	4	0	0	0	0	0	1	1	0	0	1	0	0	1	0	0
OGG2-305	11	0	15	2	0	0	1	0	1	0	0	1	1	0	3	1	0	0	0	0	0	3	0	8	2	0	0	0	0	0	0	0	1	0	0	1	0	0	0	1	0	0
OGG1-61	11	0	12	1	0	2	2	0	1	1	0	0	1	0	1	0	0	1	0	0	7	2	0	0	2	0	0	0	0	0	1	0	0	1	0	0	0	0	0	0	0	0
OGG2-306	11	0	12	1	0	0	1	0	0	1	0	0	1	0	5	2	0	0	2	0	0	0	0	0	0	0	0	1	0	0	1	0	1	0	0	3	1	0	1	0	0	2
OGG2-307	11	0	11	2	0	4	0	0	1	1	0	0	1	0	0	0	0	0	1	0	2	1	0	0	1	0	0	1	0	1	0	0	0	0	0	0	2	0	1	1	0	2
OGG2-308	11	0	11	1	0	1	0	0	0	0	0	1	1	0	0	0	0	0	1	0	4	1	0	3	3	0	2	0	0	0	1	0	0	1	0	0	1	0	0	1	0	0
OGG2-309	11	0	10	4	0	10	1	0	0	1	0	0	1	0	0	1	0	0	0	0	0	2	0	0	1	0	0	0	0	0	0	0	0	0	0	0	0	0	0	0	0	0
OGG1-62	11	0	9	1	0	1	3	0	2	1	0	0	0	0	1	1	0	0	0	0	2	1	0	0	1	0	0	1	0	1	0	0	1	0	0	1	1	0	0	1	0	0
OGG2-310	11	0	9	0	0	1	1	0	0	1	0	0	1	0	2	1	0	0	1	0	3	1	0	0	1	0	0	1	0	0	1	0	0	0	0	1	1	0	0	1	0	2
OGG2-311	11	0	8	1	0	4	1	0	0	1	0	0	0	0	2	1	0	0	1	0	2	1	0	0	1	0	0	0	0	0	1	0	0	1	0	0	1	0	0	1	0	0
OGG1-63	11	0	8	1	0	0	5	0	1	1	0	0	0	0	1	0	0	0	1	0	2	0	0	0	1	0	0	0	0	1	0	0	1	1	0	0	1	0	0	0	0	2
OGG2-312	11	0	8	1	0	0	1	0	0	2	0	0	1	0	2	1	0	0	1	0	4	1	0	0	1	0	0	1	0	0	1	0	0	0	0	0	0	0	1	0	0	1
OGG2-313	11	0	6	5	0	1	0	0	0	1	0	0	2	0	0	1	0	0	0	0	5	1	0	0	1	0	0	0	0	0	0	0	0	0	0	0	0	0	0	0	0	0
OGG1-64	11	0	5	1	0	0	1	0	0	1	0	0	1	0	0	1	0	0	1	0	4	1	0	0	1	0	0	1	0	0	1	0	0	0	0	0	0	0	1	1	0	0
OGG2-314	11	0	5	0	0	2	1	0	0	1	0	2	1	0	0	1	0	0	1	0	1	1	0	0	1	0	0	1	0	0	1	0	0	1	0	0	0	0	0	1	0	0
OGG1-65	11	0	4	1	0	1	2	0	0	1	0	0	1	0	0	1	0	0	0	0	1	0	0	1	1	0	0	1	0	0	1	0	0	0	0	1	1	0	0	1	0	0
OGG1-66	11	0	4	1	0	0	1	0	0	1	0	0	1	0	1	1	0	0	1	0	0	1	0	1	1	0	1	1	0	0	0	0	0	1	0	0	1	0	0	0	0	1
OGG2-315	11	0	4	0	0	3	1	0	1	1	0	0	1	0	0	1	0	0	1	0	0	1	0	0	1	0	0	1	0	0	1	0	0	1	0	0	1	0	0	0	0	0
OGG2-316	11	0	4	0	0	3	1	0	0	1	0	0	1	0	0	1	0	0	1	0	0	1	0	0	1	0	0	1	0	0	1	0	0	0	0	1	1	0	0	1	0	0
OGG2-317	11	0	3	1	0	0	3	0	0	1	0	0	1	0	1	1	0	0	1	0	0	1	0	0	0	0	1	0	0	1	1	0	0	1	0	0	0	0	0	0	0	0
OGG2-318	11	0	3	1	0	0	1	0	1	1	0	0	1	0	0	1	0	0	1	0	0	1	0	0	1	0	0	2	0	1	1	0	0	0	0	1	0	0	0	0	0	0
OGG2-319	11	0	3	0	0	2	3	0	0	0	0	0	2	0	0	2	0	0	0	0	0	0	0	0	0	0	0	0	0	1	1	0	0	1	0	0	1	0	0	1	0	0
OGG2-320	11	0	2	0	0	1	1	0	0	1	0	0	1	0	0	1	0	0	1	0	0	1	0	0	1	0	0	1	0	0	1	0	0	1	0	0	1	0	0	0	0	1
OGG2-321	11	0	2	0	0	1	1	0	0	1	0	0	1	0	0	1	0	0	1	0	0	1	0	0	1	0	0	1	0	0	1	0	0	0	0	1	1	0	0	1	0	0
OGG2-322	11	0	1	2	0	0	3	0	0	1	0	0	0	0	0	4	0	1	1	0	0	0	0	0	0	0	0	0	0	0	0	0	0	0	0	0	0	0	0	0	0	0
OGG1-67	11	0	1	1	0	0	4	0	0	0	0	1	1	0	0	0	0	0	0	0	0	0	0	0	0	0	0	1	0	0	1	0	0	1	0	0	1	0	0	1	0	0
OGG1-68	11	0	1	1	0	0	1	0	0	1	0	0	1	0	0	0	0	1	1	0	0	1	0	0	1	0	0	1	0	0	0	0	0	1	0	0	1	0	0	1	0	0
OGG2-323	11	0	0	1	0	0	1	0	0	1	0	0	1	0	0	1	0	0	1	0	0	1	0	0	1	0	0	1	0	0	1	0	0	1	0	0	0	0	0	0	0	0
OGG2-324	10	3	6	0	0	3	2	0	0	1	0	0	3	2	0	1	0	0	0	0	1	0	0	0	0	0	0	0	0	1	0	1	1	1	0	0	1	0	0	1	0	0
OGG2-325	10	1	10	2	1	0	0	0	1	1	0	0	2	0	6	2	0	1	0	0	0	0	0	2	0	0	0	0	0	0	1	0	0	0	0	0	1	0	0	1	0	0
OGG1-69	10	1	9	0	0	2	1	0	1	1	0	0	1	0	0	0	1	0	2	0	5	1	0	0	1	0	0	1	0	0	0	0	1	2	0	0	0	0	0	0	0	0
OGG2-326	10	1	8	8	1	1	1	0	3	1	0	2	0	0	2	0	0	0	0	0	0	0	0	0	0	0	0	0	0	0	0	0	0	0	0	0	0	0	0	0	0	0
OGG2-327	10	1	8	2	0	2	1	0	0	1	0	4	2	1	2	0	0	0	1	0	0	2	0	0	1	0	0	0	0	0	0	0	0	0	0	0	0	0	0	0	0	0
OGG2-328	10	1	8	1	1	0	1	0	0	1	0	1	1	0	1	2	0	0	0	0	0	2	0	1	2	0	0	0	0	1	0	0	1	0	0	1	0	0	1	0	0	1
OGG2-329	10	1	7	0	0	2	1	0	0	2	0	0	1	0	1	1	0	0	1	0	0	0	0	1	1	0	0	1	0	0	1	0	0	0	1	2	0	0	0	1	0	1
OGG2-330	10	1	5	2	0	1	4	0	0	1	0	1	3	0	1	0	0	1	0	1	1	0	0	0	0	0	0	0	0	0	0	0	0	0	0	0	0	0	0	0	0	0
OGG2-331	10	1	4	0	0	0	1	0	0	1	0	0	1	0	3	2	0	0	1	0	0	0	0	0	0	0	0	0	0	0	1	1	0	2	0	0	0	0	1	1	0	0
OGG1-70	10	1	2	1	0	0	1	0	0	1	0	0	1	0	0	1	0	0	1	0	0	0	1	0	1	0	0	1	0	0	0	0	1	0	0	1	1	0	0	1	0	0
OGG1-71	10	1	2	0	0	1	1	0	0	1	0	0	1	0	0	0	1	0	2	0	0	0	0	0	1	0	0	1	0	0	1	0	0	0	0	1	1	0	0	1	0	0
OGG2-332	10	1	2	0	0	0	1	0	0	0	0	1	0	0	1	1	0	0	1	0	0	1	0	0	1	0	0	1	0	0	1	0	0	1	1	0	1	0	0	1	0	0
OGG2-333	10	1	1	0	0	1	1	0	0	0	0	0	1	0	0	0	0	0	0	0	0	2	0	0	2	0	0	1	0	0	0	0	0	1	1	0	1	0	0	1	0	0
OGG1-72	10	0	21	0	0	10	0	0	2	1	0	0	1	0	0	0	0	0	2	0	7	1	0	0	2	0	0	1	0	0	0	0	1	0	0	1	1	0	0	1	0	0
OGG1-73	10	0	17	0	0	7	1	0	2	2	0	1	1	0	1	1	0	0	0	0	0	0	0	0	0	0	1	1	0	2	1	0	0	1	0	1	1	0	1	1	0	1
OGG2-334	10	0	16	1	0	7	1	0	0	0	0	1	1	0	6	0	0	0	1	0	0	1	0	0	1	0	0	1	0	0	1	0	0	0	0	2	1	0	0	1	0	0
OGG2-335	10	0	15	4	0	0	0	0	2	2	0	1	0	0	10	1	0	0	0	0	0	1	0	0	1	0	0	0	0	0	1	0	0	0	0	0	0	0	1	0	0	1
OGG2-336	10	0	15	1	0	0	1	0	0	0	0	1	2	0	0	1	0	0	0	0	4	0	0	4	1	0	2	1	0	0	0	0	1	0	0	2	0	0	1	3	0	0
OGG1-74	10	0	13	1	0	0	3	0	3	1	0	0	0	0	1	1	0	0	1	0	4	0	0	0	1	0	1	0	0	1	0	0	1	1	0	0	0	0	2	1	0	0
OGG2-337	10	0	13	1	0	0	0	0	4	2	0	0	1	0	0	0	0	1	1	0	1	1	0	0	1	0	0	1	0	0	0	0	3	0	0	2	1	0	1	1	0	1
OGG2-338	10	0	11	0	0	7	0	0	1	1	0	0	1	0	2	1	0	0	1	0	1	1	0	0	1	0	0	1	0	0	1	0	0	0	0	0	1	0	0	1	0	0
OGG2-339	10	0	10	2	0	2	0	0	1	0	0	1	1	0	1	2	0	0	0	0	0	1	0	0	1	0	0	0	0	2	1	0	1	0	0	0	1	0	1	1	0	1
OGG1-75	10	0	10	1	0	3	1	0	0	1	0	0	0	0	1	1	0	0	0	0	2	2	0	0	1	0	0	1	0	0	0	0	2	0	0	0	1	0	1	1	0	1
OGG2-340	10	0	9	2	0	2	1	0	4	0	0	0	1	0	1	1	0	0	1	0	1	1	0	0	1	0	0	0	0	0	0	0	0	1	0	1	1	0	0	0	0	0
OGG2-341	10	0	8	2	0	2	2	0	0	0	0	1	1	0	0	1	0	0	2	0	1	1	0	1	1	0	0	0	0	0	0	0	1	0	0	2	0	0	0	0	0	0
OGG2-342	10	0	8	1	0	2	1	0	2	1	0	0	1	0	0	1	0	1	3	0	3	1	0	0	1	0	0	0	0	0	0	0	0	0	0	0	0	0	0	0	0	0
OGG2-343	10	0	7	8	0	5	0	0	0	0	0	0	0	0	0	0	0	0	2	0	2	0	0	0	0	0	0	0	0	0	0	0	0	0	0	0	0	0	0	0	0	0
OGG2-344	10	0	7	1	0	0	1	0	0	2	0	0	1	0	1	1	0	0	0	0	2	0	0	0	0	0	0	1	0	0	1	0	0	1	0	3	0	0	0	1	0	1
OGG2-345	10	0	7	0	0	4	1	0	0	1	0	0	1	0	2	1	0	0	1	0	0	0	0	1	0	0	0	1	0	0	1	0	0	1	0	0	1	0	0	1	0	0
OGG2-346	10	0	7	0	0	3	1	0	0	0	0	0	1	0	2	0	0	0	1	0	1	1	0	0	2	0	0	1	0	0	1	0	0	0	0	1	1	0	0	1	0	0
OGG1-76	10	0	6	1	0	3	3	0	2	0	0	1	1	0	0	1	0	0	2	0	0	1	0	0	0	0	0	0	0	0	0	0	0	1	0	0	0	0	0	0	0	0
OGG2-347	10	0	5	1	0	1	1	0	0	0	0	0	2	0	1	0	0	1	0	0	1	0	0	0	0	0	0	1	0	0	1	0	1	2	0	0	1	0	0	1	0	0
OGG1-77	10	0	5	1	0	1	0	0	1	1	0	0	0	0	1	1	0	0	1	0	0	2	0	0	1	0	0	1	0	0	0	0	1	0	0	1	1	0	0	1	0	0
OGG1-78	10	0	5	0	0	0	1	0	0	0	0	1	1	0	0	1	0	0	0	0	0	3	0	1	4	0	0	0	0	1	0	0	2	0	0	0	0	0	0	0	0	0
OGG2-348	10	0	4	1	0	1	1	0	0	1	0	1	0	0	1	1	0	0	3	0	0	1	0	1	2	0	0	0	0	0	0	0	0	0	0	0	0	0	0	0	0	0
OGG2-349	10	0	3	2	0	0	0	0	0	1	0	1	2	0	0	1	0	1	0	0	1	2	0	0	2	0	0	0	0	0	0	0	0	0	0	0	0	0	0	0	0	0
OGG2-350	10	0	3	1	0	0	1	0	0	1	0	0	1	0	0	1	0	0	1	0	0	1	0	0	1	0	0	0	0	1	0	0	1	0	0	1	1	0	0	1	0	0
OGG2-351	10	0	3	1	0	0	1	0	0	1	0	0	1	0	0	0	0	1	1	0	0	1	0	0	1	0	0	1	0	0	1	0	0	1	0	0	0	0	1	0	0	1
OGG2-352	10	0	3	0	0	1	1	0	0	1	0	0	1	0	0	1	0	0	0	0	1	1	0	0	1	0	0	1	0	1	0	0	0	1	0	0	1	0	0	1	0	0
OGG2-353	10	0	2	4	0	0	1	0	0	0	0	0	1	0	0	1	0	0	0	0	0	0	0	0	0	0	0	0	0	0	1	0	0	1	0	1	1	0	0	0	0	1
OGG1-79	10	0	2	3	0	2	2	0	0	1	0	0	1	0	0	0	0	0	0	0	0	0	0	0	0	0	0	1	0	0	1	0	0	1	0	0	0	0	0	0	0	0
OGG2-354	10	0	1	4	0	1	2	0	0	0	0	0	4	0	0	0	0	0	0	0	0	0	0	0	0	0	0	0	0	0	0	0	0	0	0	0	0	0	0	0	0	0
OGG2-355	10	0	1	1	0	0	1	0	0	1	0	0	1	0	0	1	0	0	1	0	0	0	0	0	1	0	0	1	0	0	0	0	0	1	0	0	1	0	0	0	0	1
OGG2-356	9	1	18	3	1	6	0	0	4	0	0	1	2	0	6	1	0	0	0	0	1	0	0	0	0	0	0	0	0	0	1	0	0	0	0	0	1	0	0	1	0	0
OGG2-357	9	1	13	1	0	1	0	0	0	1	0	0	1	0	9	1	1	0	1	0	0	0	0	0	0	0	0	0	0	0	1	0	0	1	0	3	1	0	0	1	0	0
OGG2-358	9	1	9	4	0	4	4	0	0	0	0	0	0	0	1	1	0	0	0	1	4	0	0	0	0	0	0	0	0	0	0	0	0	0	0	0	0	0	0	0	0	0
OGG2-359	9	1	5	5	1	3	1	0	2	2	0	0	1	0	0	0	0	0	0	0	0	0	0	0	0	0	0	0	0	0	0	0	0	0	0	0	0	0	0	0	0	0
OGG2-360	9	1	5	1	0	0	1	0	0	1	0	0	1	0	0	0	0	1	0	0	1	1	0	0	1	0	0	0	1	1	0	0	1	1	0	1	1	0	0	1	0	0
OGG2-361	9	1	5	0	0	1	1	0	0	1	0	0	1	0	1	1	0	0	1	0	2	0	0	0	0	0	0	1	0	1	0	1	0	1	0	0	1	0	0	1	0	0
OGG1-80	9	1	4	2	0	0	1	0	2	1	0	1	2	0	1	0	0	0	0	0	0	0	0	0	0	0	0	1	0	0	1	1	0	1	0	0	0	0	0	0	0	0
OGG1-81	9	1	2	2	0	0	2	0	0	1	0	0	1	0	0	1	0	0	0	0	1	1	0	0	1	0	0	0	1	0	0	0	1	0	0	0	0	0	0	0	0	0
OGG2-362	9	1	1	2	0	0	0	0	1	1	1	0	2	0	0	2	0	0	0	0	0	1	0	0	1	0	0	0	0	0	0	0	0	0	0	0	0	0	0	0	0	0
OGG2-363	9	1	0	2	1	0	1	0	0	1	0	0	1	0	0	0	0	0	0	0	0	0	0	0	0	0	0	0	0	0	1	0	0	1	0	0	1	0	0	1	0	0
OGG2-364	9	1	0	0	0	0	0	1	0	1	0	0	2	0	0	1	0	0	0	0	0	1	0	0	1	0	0	0	0	0	0	0	0	1	0	0	1	0	0	1	0	0
OGG2-365	9	0	16	9	0	6	0	0	0	0	0	0	0	0	10	0	0	0	0	0	0	0	0	0	0	0	0	0	0	0	0	0	0	0	0	0	0	0	0	0	0	0
OGG2-366	9	0	15	1	0	2	1	0	2	1	0	0	1	0	4	1	0	0	1	0	2	1	0	2	1	0	0	0	0	1	0	0	1	0	0	1	0	0	0	1	0	0
OGG2-367	9	0	13	1	0	0	2	0	8	1	0	0	0	0	1	1	0	0	1	0	0	1	0	0	1	0	0	0	0	1	1	0	0	0	0	1	0	0	1	0	0	1
OGG2-368	9	0	13	0	0	2	0	0	0	1	0	0	0	0	2	0	0	0	3	0	8	3	0	0	1	0	1	1	0	0	0	0	0	0	0	0	0	0	0	0	0	0
OGG2-369	9	0	12	2	0	2	1	0	3	2	0	1	2	0	2	0	0	0	0	0	0	1	0	2	1	0	0	0	0	0	0	0	0	0	0	2	0	0	0	0	0	0
OGG2-370	9	0	12	0	0	5	0	0	0	1	0	0	0	0	6	0	0	1	1	0	0	1	0	0	1	0	0	1	0	0	1	0	0	1	0	0	1	0	0	1	0	0
OGG1-82	9	0	11	3	0	4	1	0	0	1	0	0	0	0	1	1	0	0	0	0	1	1	0	0	1	0	0	1	0	0	0	0	0	0	0	2	0	0	2	0	0	1
OGG2-371	9	0	10	2	0	4	2	0	2	0	0	0	1	0	0	0	0	0	0	0	0	1	0	2	1	0	1	0	0	0	0	0	0	0	0	1	1	0	0	1	0	0
OGG1-83	9	0	10	1	0	0	2	0	1	0	0	1	2	0	0	0	0	0	1	0	2	1	0	1	1	0	1	1	0	0	0	0	1	0	0	1	0	0	1	0	0	1
OGG2-372	9	0	10	1	0	0	0	0	2	1	0	0	1	0	1	2	0	0	1	0	4	1	0	0	1	0	0	0	0	1	0	0	0	0	0	0	0	0	2	1	0	0
OGG2-373	9	0	9	2	0	2	1	0	2	1	0	0	1	0	3	1	0	0	1	0	2	1	0	0	1	0	0	0	0	0	0	0	0	0	0	0	0	0	0	0	0	0
OGG2-374	9	0	9	1	0	0	1	0	0	1	0	0	1	0	0	1	0	0	0	0	0	1	0	0	1	0	0	0	0	1	1	0	0	0	0	1	1	0	4	0	0	3
OGG2-375	9	0	9	1	0	0	0	0	0	0	0	2	2	0	4	0	0	0	0	0	1	2	0	0	1	0	0	0	0	1	1	0	0	0	0	1	1	0	0	1	0	0
OGG2-376	9	0	8	0	0	2	1	0	0	0	0	0	2	0	5	2	0	1	2	0	0	1	0	0	1	0	0	0	0	0	0	0	0	0	0	0	0	0	0	0	0	0
OGG2-377	9	0	7	3	0	0	1	0	1	2	0	0	0	0	3	0	0	0	0	0	0	0	0	0	0	0	0	1	0	0	0	0	2	0	0	1	1	0	0	1	0	0
OGG2-378	9	0	7	2	0	0	0	0	1	1	0	0	1	0	0	1	0	0	1	0	0	2	0	0	1	0	1	0	0	0	0	0	1	0	0	2	0	0	1	0	0	1
OGG1-84	9	0	7	1	0	0	1	0	0	1	0	0	1	0	2	1	0	0	1	0	0	1	0	0	1	0	0	1	0	1	0	0	1	0	0	1	0	0	1	0	0	1
OGG2-379	9	0	6	1	0	0	0	0	4	1	0	0	2	0	0	1	0	0	0	0	1	0	0	0	0	0	0	1	0	0	1	0	0	1	0	0	1	0	0	0	0	1
OGG2-380	9	0	6	1	0	0	0	0	1	1	0	0	1	0	0	1	0	0	0	0	1	2	0	0	2	0	0	0	0	1	0	0	1	0	0	1	1	0	0	0	0	1
OGG2-381	9	0	6	0	0	3	1	0	0	1	0	0	1	0	1	1	0	0	1	0	0	1	0	0	1	0	0	1	0	0	1	0	0	0	0	2	0	0	0	0	0	0
OGG2-382	9	0	5	7	0	1	1	0	3	0	0	0	1	0	1	0	0	0	0	0	0	0	0	0	0	0	0	0	0	0	0	0	0	0	0	0	0	0	0	0	0	0
OGG2-383	9	0	5	1	0	0	1	0	0	0	0	0	3	0	0	1	0	0	1	0	0	1	0	0	1	0	0	0	0	1	0	0	1	0	0	1	0	0	1	0	0	1
OGG2-384	9	0	5	1	0	0	0	0	2	1	0	0	0	0	0	1	0	0	1	0	0	1	0	0	1	0	0	1	0	1	1	0	0	0	0	1	0	0	1	1	0	0
OGG2-385	9	0	5	0	0	0	1	0	0	0	0	1	1	0	0	1	0	0	1	0	0	1	0	2	1	0	0	1	0	0	1	0	0	0	0	1	0	0	1	1	0	0
OGG2-386	9	0	4	5	0	1	1	0	0	1	0	0	2	0	0	0	0	0	0	0	0	0	0	0	0	0	0	0	0	0	0	0	1	0	0	1	0	0	1	0	0	0
OGG1-85	9	0	4	1	0	0	1	0	0	1	0	0	1	0	0	0	0	1	1	0	0	0	0	1	1	0	0	1	0	0	0	0	1	1	0	0	1	0	0	0	0	1
OGG2-387	9	0	4	1	0	0	1	0	0	0	0	0	0	0	1	0	0	0	3	0	3	2	0	0	2	0	0	0	0	0	0	0	0	0	0	0	0	0	0	0	0	0
OGG2-388	9	0	3	4	0	0	0	0	0	0	0	0	0	0	1	0	0	0	0	0	1	1	0	0	1	0	0	0	0	0	1	0	0	1	0	0	1	0	0	0	0	1
OGG2-389	9	0	3	1	0	0	1	0	0	0	0	1	1	0	0	1	0	0	0	0	0	0	0	0	1	0	0	1	0	0	0	0	2	1	0	0	1	0	0	1	0	0
OGG2-390	9	0	3	1	0	0	1	0	0	0	0	0	1	0	0	0	0	1	0	0	1	1	0	0	1	0	0	0	0	1	1	0	0	1	0	0	1	0	0	1	0	0
OGG2-391	9	0	2	2	0	1	1	0	0	1	0	0	1	0	1	1	0	0	1	0	0	1	0	0	1	0	0	0	0	0	0	0	0	0	0	0	0	0	0	0	0	0
OGG1-86	9	0	2	2	0	1	1	0	0	1	0	0	0	0	0	0	0	0	0	0	0	3	0	0	1	0	1	1	0	0	0	0	0	0	0	0	0	0	0	0	0	0
OGG1-87	9	0	2	1	0	0	4	0	0	1	0	0	0	0	1	1	0	0	0	0	0	0	0	0	1	0	0	1	0	0	0	0	1	0	0	0	0	0	0	0	0	0
OGG2-392	9	0	2	1	0	0	2	0	0	1	0	1	1	0	0	1	0	0	0	0	0	0	0	0	0	0	0	0	0	0	1	0	0	1	0	0	0	0	1	1	0	0
OGG2-393	9	0	2	0	0	1	1	0	0	1	0	0	1	0	0	1	0	0	1	0	0	1	0	0	1	0	0	0	0	0	0	0	1	1	0	0	0	0	0	1	0	0
OGG1-88	8	1	14	1	0	0	2	1	5	1	0	0	1	0	0	0	0	1	0	0	4	1	0	0	1	0	0	0	0	2	1	0	0	0	0	1	0	0	1	0	0	0
OGG2-394	8	1	13	0	0	3	5	0	2	0	0	0	0	0	1	1	0	2	0	0	2	2	0	0	0	0	1	0	0	1	0	1	1	0	0	0	0	0	0	0	0	0
OGG2-395	8	1	7	1	0	0	2	0	0	0	0	0	0	0	2	0	0	0	1	0	2	2	1	0	2	0	0	0	0	1	0	0	1	0	0	1	0	0	0	0	0	0
OGG2-396	8	1	6	1	0	0	1	0	1	1	0	0	0	0	2	1	0	0	2	0	0	0	0	0	0	0	0	0	1	1	1	0	0	1	0	0	0	0	1	0	0	1
OGG2-397	8	1	5	2	0	1	1	0	0	1	0	0	0	0	1	0	0	1	0	1	0	2	0	0	2	0	0	0	0	0	0	0	1	0	0	1	0	0	0	0	0	0
OGG2-398	8	1	4	6	1	3	0	0	1	1	0	0	1	0	0	0	0	0	0	0	0	0	0	0	0	0	0	0	0	0	0	0	0	0	0	0	0	0	0	0	0	0
OGG2-399	8	1	3	1	0	0	1	0	0	1	0	0	1	0	0	1	0	0	0	0	1	0	1	0	1	0	0	1	0	0	0	0	0	0	0	1	0	0	1	1	0	0
OGG2-400	8	1	2	2	1	0	1	0	0	1	0	0	1	0	0	1	0	0	1	0	0	1	0	0	0	0	2	0	0	0	0	0	0	0	0	0	0	0	0	0	0	0
OGG2-401	8	1	2	1	0	0	1	0	0	1	0	0	1	0	0	1	0	0	0	1	0	0	0	0	0	0	0	1	0	0	0	0	1	0	0	1	1	0	0	1	0	0
OGG2-402	8	0	17	2	0	3	1	0	9	1	0	0	1	0	3	1	0	0	0	0	2	1	0	0	1	0	0	0	0	0	0	0	0	0	0	0	0	0	0	0	0	0
OGG2-403	8	0	15	1	0	4	0	0	2	2	0	0	1	0	5	1	0	0	0	0	2	0	0	0	1	0	0	0	0	0	0	0	0	0	0	0	1	0	1	1	0	1
OGG2-404	8	0	13	1	0	4	0	0	1	1	0	0	0	0	2	1	0	0	0	0	2	1	0	0	1	0	1	1	0	0	0	0	1	0	0	0	1	0	1	1	0	1
OGG2-405	8	0	10	1	0	3	0	0	0	1	0	0	1	0	1	1	0	0	1	0	4	1	0	0	1	0	0	1	0	0	0	0	0	0	0	0	0	0	1	0	0	1
OGG2-406	8	0	10	1	0	2	2	0	0	2	0	0	1	0	4	2	0	0	0	0	0	0	0	0	0	0	0	0	0	1	0	0	0	0	0	1	0	0	1	0	0	1
OGG2-407	8	0	9	7	0	9	0	0	0	1	0	0	0	0	0	0	0	0	0	0	0	0	0	0	0	0	0	0	0	0	0	0	0	0	0	0	0	0	0	0	0	0
OGG2-408	8	0	8	2	0	0	2	0	0	1	0	3	1	0	0	1	0	0	0	0	0	0	0	0	0	0	0	0	0	1	0	0	2	0	0	1	1	0	0	0	0	1
OGG2-409	8	0	6	2	0	1	1	0	2	1	0	0	1	0	0	0	0	0	0	0	0	0	0	0	0	0	0	0	0	1	1	0	0	1	0	0	0	0	1	1	0	1
OGG1-89	8	0	6	2	0	0	2	0	0	1	0	0	0	0	1	1	0	0	0	0	3	1	0	0	1	0	0	0	0	0	0	0	1	0	0	1	0	0	0	0	0	0
OGG2-410	8	0	6	1	0	3	1	0	0	0	0	1	1	0	0	1	0	0	1	0	0	1	0	0	1	0	0	0	0	0	1	0	0	0	0	0	0	0	1	0	0	1
OGG2-411	8	0	6	1	0	0	2	0	1	0	0	0	1	0	1	1	0	0	1	0	0	1	0	0	1	0	0	0	0	0	0	0	1	0	0	1	0	0	1	0	0	1
OGG1-90	8	0	6	1	0	0	1	0	0	1	0	0	1	0	1	1	0	0	1	0	0	0	0	1	0	0	1	0	0	1	1	0	0	0	0	1	0	0	1	1	0	0
OGG1-91	8	0	6	1	0	0	0	0	2	1	0	0	0	0	1	1	0	0	1	0	1	1	0	0	1	0	0	2	0	0	0	0	1	0	0	1	0	0	0	0	0	0
OGG2-412	8	0	5	1	0	4	1	0	0	0	0	0	1	0	1	1	0	0	0	0	0	2	0	0	2	0	0	0	0	0	0	0	0	0	0	0	0	0	0	0	0	0
OGG1-92	8	0	5	1	0	0	2	0	0	1	0	0	1	0	0	1	0	0	0	0	5	1	0	0	1	0	0	0	0	0	0	0	0	0	0	0	0	0	0	0	0	0
OGG2-413	8	0	5	1	0	0	0	0	0	1	0	0	1	0	0	1	0	0	1	0	0	1	0	0	1	0	0	1	0	1	0	0	1	0	0	1	0	0	1	0	0	1
OGG1-93	8	0	4	1	0	2	1	0	0	1	0	0	1	0	0	1	0	0	1	0	0	1	0	0	1	0	0	0	0	0	0	0	1	0	0	0	0	0	0	0	0	1
OGG1-94	8	0	4	1	0	0	2	0	0	1	0	0	1	0	0	1	0	0	0	0	3	1	0	0	1	0	0	0	0	1	0	0	0	0	0	0	0	0	0	0	0	0
OGG2-414	8	0	4	0	0	0	7	0	0	1	0	0	0	0	0	0	0	0	0	0	0	0	0	0	0	0	0	0	0	0	0	0	1	0	0	2	0	0	0	0	0	1
OGG2-415	8	0	3	2	0	0	1	0	0	0	0	0	1	0	1	1	0	0	1	0	0	0	0	0	0	0	0	1	0	0	0	0	0	0	0	1	0	0	1	1	0	0
OGG2-416	8	0	3	1	0	0	0	0	0	1	0	0	1	0	0	0	0	1	1	0	0	0	0	0	0	0	0	1	0	0	1	0	0	0	0	2	1	0	0	1	0	0
OGG2-417	8	0	3	0	0	1	0	0	2	1	0	0	1	0	0	1	0	0	3	0	0	1	0	0	1	0	0	0	0	0	0	0	0	0	0	0	0	0	0	0	0	0
OGG2-418	8	0	3	0	0	0	2	0	0	0	0	0	3	0	1	1	0	0	1	0	1	0	0	0	0	0	0	0	0	0	1	0	0	0	0	1	0	0	0	0	0	0
OGG2-419	8	0	3	0	0	0	1	0	0	1	0	0	0	0	1	1	0	0	1	0	0	1	0	0	1	0	0	1	0	0	1	0	0	0	0	0	0	0	1	0	0	1
OGG2-420	8	0	2	0	0	1	1	0	1	0	0	0	1	0	0	0	0	0	2	0	0	2	0	0	2	0	0	0	0	0	0	0	0	0	0	0	0	0	0	0	0	0
OGG2-421	8	0	1	2	0	1	0	0	0	0	0	0	2	0	0	1	0	0	1	0	0	1	0	0	1	0	0	0	0	0	0	0	0	0	0	0	0	0	0	0	0	0
OGG2-422	8	0	1	1	0	0	2	0	0	0	0	0	1	0	0	1	0	0	1	0	0	1	0	0	1	0	0	0	0	0	0	0	1	0	0	0	0	0	0	0	0	0
OGG2-423	7	2	4	1	0	0	1	0	0	1	0	0	1	0	0	1	0	0	1	0	0	0	0	0	1	0	0	0	2	0	0	0	1	0	0	1	0	0	1	0	0	1
OGG2-424	7	1	19	2	0	0	0	1	15	1	0	0	0	0	3	1	0	0	1	0	0	1	0	0	1	0	1	0	0	0	0	0	0	0	0	0	0	0	0	0	0	0
OGG2-425	7	1	6	1	0	1	1	0	0	1	0	0	0	1	0	1	0	0	1	0	0	1	0	0	1	0	0	0	0	1	0	0	1	0	0	1	0	0	1	0	0	1
OGG1-95	7	1	6	1	0	1	0	0	2	3	1	3	1	0	0	0	0	0	0	0	0	0	0	0	0	0	0	0	0	0	0	0	0	2	0	0	0	0	0	0	0	0
OGG2-426	7	1	6	1	0	0	1	0	0	1	0	0	1	0	0	1	0	2	0	0	1	1	0	0	1	0	0	0	1	0	0	0	1	0	0	0	0	0	1	0	0	1
OGG2-427	7	1	3	1	0	1	1	0	0	0	0	0	1	0	1	1	0	0	0	0	0	0	0	0	1	0	0	0	0	0	1	0	0	0	0	1	0	1	0	1	0	0
OGG2-428	7	0	25	3	0	20	0	0	0	1	0	0	0	0	4	1	0	0	0	0	0	1	0	1	1	0	0	0	0	0	0	0	0	0	0	0	0	0	0	0	0	0
OGG2-429	7	0	20	1	0	3	0	0	0	0	0	0	0	0	0	0	0	1	4	0	16	0	0	0	0	0	0	0	0	0	1	0	0	1	0	0	0	0	0	0	0	0
OGG1-96	7	0	17	0	0	0	1	0	0	1	0	0	1	0	1	1	0	0	2	0	13	0	0	0	0	0	0	0	0	0	0	0	1	1	0	0	0	0	1	0	0	1
OGG1-97	7	0	12	1	0	1	1	0	2	1	0	0	1	0	0	1	0	0	0	0	3	1	0	0	0	0	1	1	0	0	0	0	1	0	0	2	0	0	1	0	0	1
OGG2-430	7	0	11	2	0	4	0	0	0	0	0	1	0	0	0	1	0	0	2	0	5	1	0	0	1	0	0	0	0	0	0	0	1	0	0	0	0	0	0	0	0	0
OGG2-431	7	0	11	1	0	0	0	0	1	1	0	0	1	0	2	1	0	0	1	0	4	1	0	0	1	0	0	0	0	0	0	0	0	0	0	2	0	0	1	0	0	1
OGG2-432	7	0	9	6	0	7	0	0	1	0	0	0	1	0	0	0	0	0	0	0	1	0	0	0	0	0	0	0	0	0	0	0	0	0	0	0	0	0	0	0	0	0
OGG2-433	7	0	7	1	0	1	0	0	1	1	0	0	1	0	3	1	0	0	0	0	0	1	0	0	2	0	0	0	0	0	0	0	0	0	0	0	0	0	1	0	0	1
OGG2-434	7	0	7	1	0	0	3	0	1	0	0	0	1	0	3	0	0	0	0	0	0	0	0	0	0	0	0	0	0	1	0	0	1	0	0	1	1	0	0	1	0	0
OGG2-435	7	0	7	0	0	0	0	0	0	0	0	0	0	0	0	2	0	0	1	0	5	3	0	0	1	0	2	0	0	0	0	0	0	0	0	0	0	0	0	0	0	0
OGG2-436	7	0	6	2	0	0	1	0	0	1	0	0	1	0	0	0	0	0	1	0	3	0	0	1	1	0	0	0	0	0	0	0	0	0	0	1	0	0	1	0	0	0
OGG1-98	7	0	6	1	0	3	1	0	0	1	0	0	1	0	1	1	0	0	1	0	0	0	0	1	1	0	0	0	0	0	0	0	1	0	0	0	0	0	0	0	0	0
OGG2-437	7	0	6	1	0	1	0	0	1	1	0	1	1	0	3	1	0	0	1	0	0	1	0	0	1	0	0	0	0	0	0	0	0	0	0	0	0	0	0	0	0	0
OGG2-438	7	0	6	0	0	2	1	0	0	1	0	2	1	0	1	0	0	1	0	0	0	0	0	0	0	0	0	0	0	0	1	0	0	1	0	0	1	0	0	1	0	0
OGG2-439	7	0	6	0	0	0	0	0	0	1	0	0	0	0	0	0	0	0	0	0	0	4	0	1	2	0	0	0	0	1	0	0	0	0	0	1	0	0	1	0	0	2
OGG2-440	7	0	5	3	0	0	0	0	2	1	0	0	1	0	0	0	0	0	0	0	0	0	0	0	0	0	0	2	0	0	0	0	1	0	0	0	0	0	1	0	0	1
OGG1-99	7	0	5	2	0	1	0	0	0	1	0	0	0	0	1	1	0	0	1	0	0	1	0	0	1	0	0	0	0	0	0	0	0	0	0	1	0	0	1	0	0	1
OGG1-100	7	0	4	2	0	0	0	0	0	1	0	0	1	0	1	0	0	0	0	0	0	0	0	0	0	0	0	1	0	1	0	0	0	0	0	1	1	0	1	1	0	0
OGG2-441	7	0	4	1	0	0	1	0	0	1	0	0	1	0	0	0	0	0	1	0	0	0	0	0	0	0	0	1	0	0	0	0	1	0	0	2	1	0	0	0	0	1
OGG1-101	7	0	4	1	0	0	0	0	1	1	0	0	1	0	0	0	0	1	1	0	0	1	0	0	1	0	1	1	0	0	0	0	1	0	0	0	0	0	0	0	0	0
OGG2-442	7	0	4	1	0	0	0	0	0	0	0	0	0	0	1	0	0	0	0	0	1	3	0	0	3	0	2	0	0	0	0	0	0	0	0	0	0	0	0	0	0	0
OGG2-443	7	0	4	0	0	1	1	0	0	1	0	0	1	0	1	0	0	1	0	0	0	0	0	0	0	0	0	1	0	0	1	0	0	0	0	1	1	0	0	1	0	0
OGG2-444	7	0	3	1	0	0	1	0	0	1	0	0	1	0	0	0	0	0	0	0	0	0	0	0	0	0	0	0	0	1	1	0	0	1	0	1	0	0	1	1	0	0
OGG2-445	7	0	2	1	0	0	2	0	0	1	0	0	1	0	0	0	0	0	1	0	0	0	0	0	0	0	0	0	0	0	0	0	0	1	0	0	0	0	1	0	0	1
OGG2-446	7	0	2	1	0	0	1	0	0	0	0	0	2	0	0	1	0	0	0	0	0	1	0	0	1	0	0	0	0	0	0	0	0	0	0	2	0	0	0	0	0	0
OGG2-447	7	0	1	1	0	0	1	0	0	0	0	0	1	0	1	1	0	0	1	0	0	1	0	0	1	0	0	0	0	0	0	0	0	0	0	0	0	0	0	0	0	0
OGG2-448	7	0	1	0	0	0	1	0	0	1	0	0	0	0	0	1	0	1	1	0	0	1	0	0	1	0	0	0	0	0	1	0	0	0	0	0	0	0	0	0	0	0
OGG2-449	6	1	29	4	1	8	1	0	2	1	0	0	0	0	16	0	0	0	0	0	3	0	0	0	0	0	0	0	0	0	0	0	0	0	0	0	0	0	0	0	0	0
OGG2-450	6	1	14	1	1	5	2	0	2	2	0	1	0	0	6	1	0	0	0	0	0	0	0	0	0	0	0	0	0	0	0	0	0	0	0	0	0	0	0	0	0	0
OGG2-451	6	1	12	3	1	3	1	0	0	0	0	1	0	0	2	1	0	0	1	0	1	0	0	0	0	0	0	0	0	0	0	0	1	0	0	2	0	0	1	0	0	1
OGG2-452	6	1	9	1	0	1	1	0	0	1	0	1	0	0	2	1	0	0	0	0	0	1	0	0	0	0	1	0	0	1	0	0	1	0	1	1	0	0	1	1	0	0
OGG1-102	6	1	8	2	0	0	0	0	2	1	0	0	1	0	0	0	1	0	0	0	3	1	0	0	1	0	0	0	0	1	0	0	1	0	0	1	0	0	0	0	0	0
OGG2-453	6	1	6	0	1	0	1	0	0	0	0	0	1	0	1	1	0	0	0	0	1	1	0	0	1	0	0	0	0	1	1	0	0	0	0	1	0	0	1	0	0	1
OGG2-454	6	1	5	0	1	0	1	0	0	1	0	0	1	0	0	1	0	0	1	0	0	0	0	0	0	0	0	0	0	2	0	0	1	0	0	1	1	0	0	0	0	1
OGG2-455	6	1	4	0	0	2	0	1	0	1	0	0	1	0	0	1	0	0	1	0	0	0	0	0	0	0	0	0	0	0	1	0	0	1	0	0	0	0	1	0	0	1
OGG2-456	6	1	3	0	0	0	1	0	0	0	0	0	1	0	1	0	0	1	1	0	1	0	0	0	0	0	0	1	0	0	0	0	0	0	1	0	1	0	0	1	0	0
OGG2-457	6	1	2	1	0	2	1	0	0	1	0	0	0	1	0	1	0	0	1	0	0	0	0	0	1	0	0	0	0	0	0	0	0	0	0	0	0	0	0	0	0	0
OGG2-458	6	1	1	0	0	1	0	1	0	1	0	0	1	0	0	1	0	0	1	0	0	1	0	0	1	0	0	0	0	0	0	0	0	0	0	0	0	0	0	0	0	0
OGG2-459	6	0	54	2	0	49	0	0	2	2	0	0	2	0	3	0	0	0	0	0	0	0	0	0	0	0	0	0	0	0	0	0	0	0	0	0	0	0	0	0	0	0
OGG2-460	6	0	24	0	0	5	1	0	3	0	0	3	1	0	1	1	0	0	0	0	1	0	0	0	0	0	0	1	0	2	0	0	3	0	0	3	1	0	1	1	0	2
OGG2-461	6	0	22	2	0	5	0	0	2	1	0	0	0	0	4	2	0	0	0	0	5	1	0	0	0	0	1	0	0	2	0	0	0	0	0	1	0	0	1	0	0	1
OGG2-462	6	0	21	4	0	9	0	0	4	1	0	0	0	0	4	0	0	1	0	0	0	0	0	0	0	0	0	0	0	1	1	0	0	0	0	0	0	0	1	0	0	1
OGG2-463	6	0	14	0	0	3	0	0	1	0	0	0	1	0	1	0	0	1	2	0	0	1	0	4	1	0	1	0	0	0	0	0	1	0	0	2	0	0	0	1	0	0
OGG2-464	6	0	13	2	0	1	1	0	0	0	0	1	0	0	0	0	0	0	1	0	8	0	0	0	0	0	0	0	0	0	0	0	1	0	0	1	1	0	1	1	0	0
OGG2-465	6	0	13	1	0	0	0	0	1	1	0	0	0	0	3	1	0	0	1	0	4	0	0	3	1	0	0	1	0	0	0	0	0	0	0	0	0	0	1	0	0	1
OGG2-466	6	0	13	0	0	6	0	0	1	1	0	0	0	0	1	0	0	0	0	0	2	1	0	0	2	0	0	1	0	1	0	0	0	0	0	1	0	0	1	1	0	0
OGG1-103	6	0	13	0	0	2	3	0	8	1	0	0	1	0	2	1	0	0	0	0	0	0	0	0	0	0	0	0	0	1	0	0	0	0	0	0	0	0	0	0	0	0
OGG2-467	6	0	10	0	0	7	1	0	1	0	0	0	2	0	1	0	0	0	1	0	1	0	0	0	0	0	0	0	0	0	0	0	0	0	0	0	1	0	0	1	0	0
OGG1-104	6	0	10	0	0	0	3	0	1	0	0	0	1	0	0	0	0	0	0	0	3	0	0	1	0	0	2	1	0	0	0	0	1	1	0	0	0	0	1	0	0	1
OGG2-468	6	0	8	0	0	1	1	0	1	0	0	0	1	0	1	0	0	2	0	0	0	1	0	1	1	0	0	0	0	0	1	0	0	1	0	0	0	0	1	0	0	1
OGG2-469	6	0	8	0	0	1	0	0	1	1	0	0	1	0	0	1	0	0	1	0	0	1	0	0	1	0	0	0	0	1	0	0	1	0	0	2	0	0	1	0	0	1
OGG2-470	6	0	7	1	0	0	1	0	0	0	0	0	0	0	2	0	0	0	0	0	1	2	0	0	2	0	0	0	0	0	0	0	1	0	0	1	0	0	1	0	0	1
OGG1-105	6	0	7	0	0	1	1	0	0	1	0	0	1	0	0	1	0	0	1	0	0	0	0	1	1	0	0	0	0	1	0	0	1	0	0	1	0	0	1	0	0	1
OGG2-471	6	0	6	1	0	1	1	0	0	0	0	1	1	0	0	1	0	0	1	0	0	0	0	0	1	0	0	0	0	0	0	0	1	0	0	1	0	0	1	0	0	1
OGG1-106	6	0	6	1	0	0	1	0	0	1	0	0	0	0	0	1	0	0	0	0	2	1	0	1	1	0	0	0	0	1	0	0	0	0	0	0	0	0	1	0	0	1
OGG2-472	6	0	6	0	0	5	1	0	0	1	0	0	0	0	1	1	0	0	1	0	0	1	0	0	1	0	0	0	0	0	0	0	0	0	0	0	0	0	0	0	0	0
OGG1-107	6	0	6	0	0	1	1	0	0	1	0	0	0	0	1	1	0	0	0	0	1	0	0	1	1	0	0	0	0	0	0	0	1	1	0	0	1	0	0	0	0	1
OGG2-473	6	0	5	1	0	0	2	0	0	1	0	0	1	0	0	0	0	0	0	0	0	0	0	0	0	0	0	0	0	1	0	0	1	0	0	2	0	0	1	1	0	0
OGG2-474	6	0	4	2	0	1	3	0	0	0	0	0	1	0	2	0	0	0	0	0	0	0	0	1	0	0	0	0	0	0	0	0	0	0	0	0	0	0	0	0	0	0
OGG2-475	6	0	4	1	0	0	0	0	1	1	0	0	1	0	1	0	0	0	0	0	0	0	0	0	0	0	0	1	0	0	0	0	0	1	0	0	1	0	1	0	0	1
OGG2-476	6	0	4	1	0	0	0	0	1	1	0	0	1	0	0	1	0	0	1	0	0	0	0	1	1	0	0	0	0	0	0	0	0	0	0	0	0	0	1	0	0	1
OGG2-477	6	0	4	0	0	1	1	0	0	2	0	0	1	0	0	1	0	0	0	0	0	0	0	1	1	0	0	0	0	0	0	0	0	0	0	1	0	0	0	0	0	1
OGG2-478	6	0	3	2	0	2	0	0	0	0	0	0	4	0	1	0	0	0	0	0	0	0	0	0	0	0	0	0	0	0	0	0	0	0	0	0	0	0	0	0	0	0
OGG2-479	6	0	3	1	0	1	1	0	0	0	0	1	1	0	0	0	0	0	0	0	0	1	0	0	1	0	0	0	0	0	0	0	0	1	0	0	0	0	0	0	0	1
OGG2-480	6	0	2	1	0	1	2	0	1	1	0	0	0	0	0	1	0	0	1	0	0	0	0	0	0	0	0	0	0	0	0	0	0	0	0	0	0	0	0	0	0	0
OGG2-481	6	0	2	1	0	0	2	0	1	0	0	1	1	0	0	1	0	0	0	0	0	0	0	0	1	0	0	0	0	0	0	0	0	0	0	0	0	0	0	0	0	0
OGG2-482	6	0	2	0	0	1	0	0	1	1	0	0	1	0	0	1	0	0	1	0	0	1	0	0	1	0	0	0	0	0	0	0	0	0	0	0	0	0	0	0	0	0
OGG2-483	6	0	2	0	0	1	0	0	0	1	0	0	1	0	0	1	0	0	1	0	0	1	0	1	1	0	0	0	0	0	0	0	0	0	0	0	0	0	0	0	0	0
OGG2-484	6	0	1	1	0	0	1	0	0	1	0	0	1	0	0	0	0	0	0	0	1	1	0	0	1	0	0	0	0	0	0	0	0	0	0	0	0	0	0	0	0	0
OGG2-485	6	0	0	2	0	0	1	0	0	1	0	0	2	0	0	0	0	0	0	0	0	0	0	0	0	0	0	0	0	0	0	0	0	0	0	0	0	0	0	0	0	0
OGG2-486	5	3	10	0	1	1	1	0	0	0	0	0	1	0	1	0	0	2	0	0	1	1	1	0	1	0	1	0	0	1	0	0	1	0	0	2	0	1	0	1	0	0
OGG2-487	5	1	12	1	0	3	0	0	0	0	0	0	0	0	0	0	0	0	2	0	8	0	0	0	0	0	0	0	0	0	1	0	0	0	0	1	0	1	0	1	0	0
OGG1-108	5	1	11	0	0	1	0	1	8	1	0	0	0	0	1	0	0	0	0	0	0	0	0	0	0	0	0	1	0	0	0	0	0	1	0	1	1	0	0	1	0	0
OGG2-488	5	1	9	2	0	5	1	0	0	0	0	0	1	0	0	0	0	0	0	0	0	0	0	0	0	0	0	1	0	0	0	0	1	0	1	1	0	0	1	0	0	1
OGG1-109	5	1	3	1	1	0	1	0	3	0	0	0	3	0	0	0	0	0	0	0	0	0	0	0	0	0	0	0	0	0	0	0	0	0	0	0	0	0	0	0	0	0
OGG2-489	5	0	66	1	0	16	0	0	20	1	0	0	1	0	11	1	0	2	0	0	4	0	0	3	0	0	3	0	0	3	0	0	1	0	0	0	1	0	1	0	0	2
OGG2-490	5	0	20	1	0	1	0	0	3	1	0	3	1	0	1	0	0	0	1	0	2	0	0	3	0	0	3	0	0	1	0	0	1	0	0	1	0	0	1	1	0	0
OGG1-110	5	0	17	2	0	4	0	0	5	1	0	0	0	0	0	0	0	1	0	0	3	1	0	0	1	0	0	0	0	0	0	0	1	0	0	1	0	0	1	0	0	1
OGG2-491	5	0	15	1	0	7	0	0	1	1	0	0	1	0	4	0	0	0	0	0	0	0	0	0	0	0	0	1	0	1	1	0	0	0	0	0	0	0	1	0	0	1
OGG2-492	5	0	10	1	0	4	1	0	0	1	0	0	1	0	1	0	0	0	1	0	0	0	0	0	0	0	0	0	0	1	0	0	1	0	0	0	0	0	1	0	0	2
OGG1-111	5	0	9	1	0	2	0	0	2	1	0	0	2	0	0	0	0	0	0	0	0	0	0	0	0	0	0	0	0	1	0	0	1	0	0	2	0	0	1	1	0	0
OGG2-493	5	0	8	1	0	1	0	0	1	0	0	1	1	0	1	0	0	0	0	0	0	0	0	0	0	0	0	1	0	1	0	0	1	0	0	2	1	0	0	1	0	0
OGG2-494	5	0	8	0	0	1	1	0	0	1	0	0	0	0	2	0	0	0	0	0	1	0	0	1	1	0	2	0	0	0	0	0	0	0	0	1	1	0	0	1	0	0
OGG1-112	5	0	6	1	0	0	0	0	3	1	0	0	0	0	1	0	0	0	0	0	0	0	0	0	0	0	0	1	0	0	0	0	1	1	0	0	1	0	0	0	0	1
OGG1-113	5	0	6	1	0	0	0	0	0	0	0	0	1	0	0	1	0	0	0	0	5	1	0	0	1	0	0	0	0	0	0	0	1	0	0	0	0	0	0	0	0	0
OGG2-495	5	0	5	3	0	2	0	0	0	0	0	0	1	0	0	0	0	0	0	0	0	0	0	0	0	0	0	0	0	0	1	0	0	0	0	1	0	0	1	0	0	1
OGG2-496	5	0	5	1	0	0	1	0	0	0	0	0	1	0	0	1	0	0	0	0	0	0	0	0	0	0	0	0	0	1	0	0	0	0	0	3	1	0	0	0	0	1
OGG2-497	5	0	5	1	0	0	0	0	1	0	0	0	1	0	0	1	0	0	0	0	0	0	0	0	0	0	0	1	0	0	0	0	1	0	0	2	0	0	1	1	0	0
OGG2-498	5	0	5	1	0	0	0	0	0	0	0	2	1	0	3	1	0	0	0	0	0	0	0	0	2	0	0	0	0	0	0	0	0	0	0	0	0	0	0	0	0	0
OGG2-499	5	0	4	3	0	0	0	0	4	0	0	0	2	0	0	0	0	0	0	0	0	0	0	0	0	0	0	0	0	0	0	0	0	0	0	0	0	0	0	0	0	0
OGG1-114	5	0	4	2	0	2	2	0	1	1	0	0	0	0	0	0	0	0	0	0	0	0	0	0	0	0	0	0	0	0	0	0	1	0	0	0	0	0	0	0	0	0
OGG2-500	5	0	4	2	0	0	0	0	0	1	0	0	0	0	2	1	0	0	0	0	1	0	0	0	0	0	0	1	0	0	0	0	1	0	0	0	0	0	0	0	0	0
OGG2-501	5	0	4	1	0	1	2	0	0	2	0	1	0	0	2	0	0	0	0	0	0	0	0	0	0	0	0	0	0	0	0	0	0	0	0	0	0	0	0	0	0	0
OGG2-502	5	0	4	1	0	0	1	0	1	0	0	0	1	0	1	0	0	1	0	0	0	0	0	1	1	0	0	0	0	0	1	0	0	0	0	0	0	0	0	0	0	0
OGG1-115	5	0	3	2	0	0	0	0	0	0	0	0	0	0	1	0	0	1	0	0	0	0	0	0	0	0	0	1	0	0	0	0	1	0	0	0	1	0	0	1	0	0
OGG2-503	5	0	3	1	0	2	2	0	0	1	0	1	1	0	0	0	0	0	0	0	0	0	0	0	0	0	0	0	0	0	0	0	0	0	0	0	0	0	0	0	0	0
OGG2-504	5	0	3	1	0	1	1	0	0	0	0	1	0	0	0	1	0	0	0	0	1	0	0	0	0	0	0	0	0	0	0	0	0	0	0	0	1	0	0	1	0	0
OGG2-505	5	0	3	0	0	1	0	0	1	1	0	0	1	0	0	1	0	0	0	0	1	1	0	0	1	0	0	0	0	0	0	0	0	0	0	0	0	0	0	0	0	0
OGG2-506	5	0	2	1	0	1	1	0	0	0	0	0	0	0	1	0	0	0	0	0	0	0	0	0	0	0	0	0	0	0	0	0	0	1	0	0	1	0	0	1	0	0
OGG1-116	5	0	2	1	0	1	0	0	0	0	0	1	0	0	0	0	0	0	0	0	0	0	0	0	0	0	0	1	0	0	0	0	0	1	0	0	1	0	0	1	0	0
OGG2-507	5	0	2	0	0	0	5	0	2	0	0	0	0	0	0	0	0	0	0	0	0	0	0	0	0	0	0	0	0	0	0	0	0	0	0	0	0	0	0	0	0	0
OGG2-508	5	0	2	0	0	0	0	0	0	0	0	0	0	0	0	0	0	0	2	0	2	1	0	0	2	0	0	0	0	0	0	0	0	0	0	0	0	0	0	0	0	0
OGG2-509	5	0	0	0	0	0	2	0	0	1	0	0	0	0	0	1	0	0	1	0	0	0	0	0	0	0	0	0	0	0	0	0	0	0	0	0	0	0	0	0	0	0
OGG2-510	4	3	4	0	0	1	0	0	1	1	0	0	0	0	1	0	0	0	0	0	0	0	0	1	1	0	0	0	1	0	0	1	0	0	1	0	1	0	0	1	0	0
OGG2-511	4	2	10	2	0	0	0	0	1	0	0	0	0	0	1	1	2	0	0	0	1	0	0	2	0	0	1	1	0	0	0	0	1	0	0	1	0	0	1	0	0	1
OGG2-512	4	1	13	1	0	1	0	1	2	2	0	0	0	0	2	0	0	0	1	0	0	0	0	0	0	0	0	0	0	2	0	0	1	0	0	2	0	0	2	0	0	1
OGG2-513	4	1	11	2	0	4	1	0	0	0	0	0	0	1	0	1	0	0	0	0	1	0	0	0	0	0	0	0	0	1	0	0	1	0	0	2	0	0	1	0	0	1
OGG2-514	4	1	6	0	0	0	0	0	0	0	1	0	1	0	0	0	0	1	1	0	0	1	0	0	1	0	0	0	0	0	0	0	0	0	0	2	0	0	1	0	0	2
OGG2-515	4	1	5	1	0	1	2	0	0	0	0	1	0	0	1	1	1	2	0	0	0	0	0	0	0	0	0	0	0	0	0	0	0	0	0	0	0	0	0	0	0	0
OGG2-516	4	0	22	1	0	1	1	0	3	0	0	2	2	0	2	0	0	0	0	0	2	0	0	1	0	0	1	0	0	1	0	0	2	0	0	3	0	0	2	0	0	2
OGG1-117	4	0	17	2	0	1	0	0	6	1	0	1	0	0	0	0	0	0	0	0	6	1	0	0	0	0	2	0	0	1	0	0	0	0	0	0	0	0	0	0	0	0
OGG1-118	4	0	11	0	0	3	0	0	1	1	0	0	1	0	0	0	0	0	0	0	2	1	0	1	1	0	0	0	0	0	0	0	1	0	0	1	0	0	1	0	0	1
OGG1-119	4	0	10	1	0	0	0	0	3	0	0	1	0	0	1	0	0	1	0	0	1	1	0	0	1	0	0	1	0	0	0	0	0	0	0	1	0	0	1	0	0	1
OGG2-517	4	0	9	2	0	0	1	0	0	0	0	3	1	0	5	0	0	1	0	0	0	0	0	0	0	0	0	0	0	0	0	0	0	0	0	0	0	0	0	0	0	0
OGG1-120	4	0	9	1	0	2	0	0	2	0	0	0	1	0	1	1	0	0	1	0	2	0	0	0	0	0	0	0	0	0	0	0	1	0	0	1	0	0	0	0	0	0
OGG2-518	4	0	9	0	0	2	0	0	0	0	0	1	0	0	1	1	0	0	0	0	5	2	0	0	1	0	0	0	0	0	0	0	0	0	0	0	0	0	0	0	0	0
OGG2-519	4	0	9	0	0	1	2	0	0	1	0	5	0	0	2	0	0	0	0	0	1	0	0	0	0	0	0	1	0	0	0	0	0	0	0	0	0	0	0	0	0	0
OGG2-520	4	0	8	0	0	0	1	0	0	0	0	1	0	0	1	1	0	0	0	0	1	1	0	0	1	0	0	0	0	1	0	0	1	0	0	1	0	0	1	0	0	1
OGG2-521	4	0	7	1	0	5	0	0	0	0	0	0	0	0	0	0	0	0	0	0	0	0	0	0	0	0	0	0	0	1	1	0	0	1	0	0	0	0	1	1	0	0
OGG2-522	4	0	7	1	0	0	0	0	0	0	0	1	1	0	0	0	0	0	1	0	0	0	0	1	1	0	0	0	0	1	0	0	1	0	0	1	0	0	1	0	0	1
OGG2-523	4	0	7	1	0	0	0	0	0	0	0	1	0	0	1	0	0	0	1	0	0	1	0	0	1	0	0	0	0	1	0	0	1	0	0	1	0	0	1	0	0	1
OGG2-524	4	0	7	0	0	1	0	0	0	0	0	1	1	0	0	1	0	0	0	0	0	1	0	0	1	0	0	0	0	1	0	0	1	0	0	1	0	0	1	0	0	1
OGG2-525	4	0	6	2	0	0	2	0	4	0	0	0	0	0	2	0	0	0	0	0	0	0	0	0	0	0	0	0	0	0	0	0	0	0	0	0	0	0	0	0	0	0
OGG1-121	4	0	6	1	0	1	1	0	1	1	0	4	1	0	0	0	0	0	0	0	0	0	0	0	0	0	0	0	0	0	0	0	0	0	0	0	0	0	0	0	0	0
OGG1-122	4	0	5	3	0	3	0	0	0	1	0	1	0	0	1	0	0	0	0	0	0	0	0	0	0	0	0	0	0	0	0	0	0	0	0	0	0	0	0	0	0	0
OGG2-526	4	0	5	2	0	0	0	0	0	0	0	1	1	0	0	0	0	0	0	0	0	0	0	1	1	0	0	0	0	0	0	0	0	0	0	1	0	0	1	0	0	1
OGG2-527	4	0	5	2	0	0	0	0	0	0	0	1	0	0	3	1	0	1	0	0	0	0	0	0	1	0	0	0	0	0	0	0	0	0	0	0	0	0	0	0	0	0
OGG2-528	4	0	5	1	0	1	1	0	0	0	0	0	1	0	0	1	0	0	0	0	0	0	0	0	0	0	0	0	0	0	0	0	1	0	0	1	0	0	1	0	0	1
OGG2-529	4	0	5	1	0	0	0	0	1	0	0	0	0	0	1	0	0	1	0	0	0	0	0	0	0	0	0	0	0	1	0	0	1	1	0	0	1	0	0	1	0	0
OGG2-530	4	0	5	0	0	0	1	0	1	0	0	1	3	0	3	0	0	0	0	0	0	0	0	0	0	0	0	0	0	0	0	0	0	0	0	0	0	0	0	0	0	0
OGG2-531	4	0	4	2	0	1	1	0	0	0	0	1	1	0	2	0	0	0	0	0	0	0	0	0	0	0	0	0	0	0	0	0	0	0	0	0	0	0	0	0	0	0
OGG1-123	4	0	4	2	0	1	0	0	0	0	0	1	0	0	0	0	0	0	0	0	0	0	0	0	0	0	0	0	0	1	0	0	0	0	0	1	1	0	0	1	0	0
OGG1-124	4	0	4	1	0	1	1	0	0	1	0	0	1	0	2	0	0	0	0	0	0	0	0	0	0	0	0	0	0	0	0	0	0	0	0	1	0	0	0	0	0	0
OGG1-125	4	0	4	1	0	0	1	0	2	0	0	0	0	0	1	1	0	0	1	0	1	0	0	0	0	0	0	0	0	0	0	0	0	0	0	0	0	0	0	0	0	0
OGG2-532	4	0	4	1	0	0	1	0	0	0	0	0	0	0	1	1	0	0	0	0	1	0	0	0	1	0	0	0	0	0	0	0	1	0	0	1	0	0	0	0	0	0
OGG2-533	4	0	3	2	0	2	1	0	0	0	0	1	1	0	0	0	0	0	0	0	0	0	0	0	0	0	0	0	0	0	0	0	0	0	0	0	0	0	0	0	0	0
OGG1-126	4	0	3	2	0	1	0	0	0	1	0	1	1	0	1	0	0	0	0	0	0	0	0	0	0	0	0	0	0	0	0	0	0	0	0	0	0	0	0	0	0	0
OGG2-534	4	0	3	0	0	2	0	0	1	1	0	0	1	0	0	1	0	0	1	0	0	0	0	0	0	0	0	0	0	0	0	0	0	0	0	0	0	0	0	0	0	0
OGG1-127	4	0	3	0	0	1	1	0	0	0	0	1	0	0	0	1	0	0	0	0	0	1	0	1	1	0	0	0	0	0	0	0	0	0	0	0	0	0	0	0	0	0
OGG2-535	4	0	2	1	0	0	0	0	1	1	0	0	1	0	0	0	0	0	0	0	0	0	0	0	0	0	0	1	0	0	0	0	1	0	0	0	0	0	0	0	0	0
OGG2-536	4	0	2	0	0	1	0	0	0	1	0	0	1	0	0	0	0	0	1	0	0	0	0	1	1	0	0	0	0	0	0	0	0	0	0	0	0	0	0	0	0	0
OGG1-128	4	0	1	2	0	1	0	0	0	1	0	0	0	0	0	0	0	0	0	0	0	0	0	0	0	0	0	1	0	0	0	0	0	0	0	0	0	0	0	0	0	0
OGG2-537	4	0	1	2	0	0	1	0	0	0	0	0	1	0	1	0	0	0	0	0	0	0	0	0	0	0	0	0	0	0	0	0	0	0	0	0	0	0	0	0	0	0
OGG2-538	4	0	0	1	0	0	1	0	0	1	0	0	1	0	0	0	0	0	0	0	0	0	0	0	0	0	0	0	0	0	0	0	0	0	0	0	0	0	0	0	0	0
OGG2-539	4	0	0	1	0	0	0	0	0	0	0	0	0	0	0	0	0	0	0	0	0	1	0	0	1	0	0	0	0	0	1	0	0	0	0	0	0	0	0	0	0	0
OGG2-540	3	2	5	1	0	0	0	0	1	1	0	0	1	1	0	0	0	0	0	0	0	0	0	0	0	0	0	0	1	0	0	0	1	0	0	1	0	0	1	0	0	1
OGG2-541	3	1	2	1	1	0	1	0	0	0	0	0	0	0	2	1	0	0	0	0	0	0	0	0	0	0	0	0	0	0	0	0	0	0	0	0	0	0	0	0	0	0
OGG2-542	3	1	1	0	0	1	1	1	0	1	0	0	0	0	0	1	0	0	0	0	0	0	0	0	0	0	0	0	0	0	0	0	0	0	0	0	0	0	0	0	0	0
OGG2-543	3	0	41	1	0	13	0	0	26	1	0	0	1	0	2	0	0	0	0	0	0	0	0	0	0	0	0	0	0	0	0	0	0	0	0	0	0	0	0	0	0	0
OGG2-544	3	0	18	1	0	10	0	0	1	0	0	0	0	0	6	1	0	0	0	0	0	0	0	0	0	0	0	0	0	1	1	0	0	0	0	0	0	0	0	0	0	0
OGG2-545	3	0	15	0	0	3	1	0	3	1	0	0	1	0	2	0	0	0	0	0	0	0	0	0	0	0	0	0	0	0	0	0	1	0	0	2	0	0	1	0	0	3
OGG1-129	3	0	12	1	0	0	0	0	0	0	0	0	1	0	0	1	0	0	0	0	11	0	0	0	0	0	0	0	0	0	0	0	1	0	0	0	0	0	0	0	0	0
OGG2-546	3	0	11	1	0	0	1	0	0	1	0	0	0	0	0	0	0	1	0	0	2	0	0	1	0	0	1	0	0	2	0	0	1	0	0	1	0	0	1	0	0	1
OGG2-547	3	0	11	0	0	6	0	0	0	0	0	0	0	0	5	0	0	0	0	0	0	0	0	0	0	0	0	0	0	0	0	0	0	1	0	0	1	0	0	1	0	0
OGG1-130	3	0	10	0	0	1	0	0	1	1	0	0	1	0	0	1	0	0	0	0	1	0	0	0	0	0	1	0	0	1	0	0	1	0	0	2	0	0	1	0	0	1
OGG2-548	3	0	8	1	0	6	0	0	0	0	0	0	0	0	0	0	0	0	0	0	1	0	0	0	0	0	1	0	0	0	0	0	0	0	0	0	1	0	0	1	0	0
OGG1-131	3	0	8	1	0	2	0	0	1	1	0	1	0	0	1	0	0	0	0	0	1	0	0	0	1	0	0	0	0	1	0	0	1	0	0	0	0	0	0	0	0	0
OGG2-549	3	0	6	2	0	2	1	0	0	0	0	1	0	0	2	0	0	1	0	0	0	0	0	0	0	0	0	0	0	0	0	0	0	0	0	0	0	0	0	0	0	0
OGG2-550	3	0	5	1	0	4	1	0	0	1	0	0	0	0	1	0	0	0	0	0	0	0	0	0	0	0	0	0	0	0	0	0	0	0	0	0	0	0	0	0	0	0
OGG2-551	3	0	5	1	0	1	0	0	1	1	0	0	0	0	1	0	0	0	0	0	1	1	0	0	0	0	1	0	0	0	0	0	0	0	0	0	0	0	0	0	0	0
OGG2-552	3	0	5	0	0	1	0	0	2	2	0	0	0	0	2	0	0	0	1	0	0	0	0	0	0	0	0	0	0	0	0	0	0	0	0	0	0	0	0	0	0	0
OGG2-553	3	0	5	0	0	1	0	0	1	0	0	1	1	0	1	0	0	0	0	0	0	0	0	0	0	0	0	0	0	0	1	0	0	0	0	0	1	0	0	0	0	1
OGG2-554	3	0	5	0	0	0	0	0	1	1	0	0	1	0	0	0	0	0	0	0	0	0	0	0	1	0	0	0	0	1	0	0	0	0	0	1	0	0	1	0	0	1
OGG2-555	3	0	4	1	0	0	2	0	1	0	0	0	0	0	0	0	0	0	0	0	0	0	0	0	0	0	0	0	0	0	0	0	0	0	0	1	0	0	1	0	0	1
OGG2-556	3	0	4	0	0	2	1	0	0	1	0	0	0	0	1	0	0	0	0	0	0	0	0	0	0	0	0	1	0	0	0	0	1	0	0	0	0	0	0	0	0	0
OGG2-557	3	0	3	2	0	3	0	0	0	0	0	0	0	0	0	0	0	0	0	0	0	0	0	0	0	0	0	0	0	0	0	0	0	0	0	0	1	0	0	0	0	0
OGG2-558	3	0	3	2	0	0	0	0	1	0	0	0	1	0	0	0	0	0	0	0	0	0	0	0	0	0	0	0	0	1	0	0	0	0	0	1	0	0	0	0	0	0
OGG2-559	3	0	3	1	0	2	0	0	0	0	0	0	0	0	0	0	0	0	0	0	0	0	0	0	0	0	0	0	0	0	0	0	0	0	0	1	1	0	0	1	0	0
OGG2-560	3	0	3	1	0	0	1	0	1	1	0	0	0	0	2	0	0	0	0	0	0	0	0	0	0	0	0	0	0	0	0	0	0	0	0	0	0	0	0	0	0	0
OGG2-561	3	0	3	0	0	2	0	0	1	0	0	0	1	0	0	1	0	0	0	0	0	0	0	0	1	0	0	0	0	0	0	0	0	0	0	0	0	0	0	0	0	0
OGG2-562	3	0	2	2	0	1	0	0	0	1	0	0	0	0	1	0	0	0	0	0	0	0	0	0	0	0	0	0	0	0	0	0	0	0	0	0	0	0	0	0	0	0
OGG2-563	3	0	2	1	0	0	0	0	1	1	0	0	1	0	1	0	0	0	0	0	0	0	0	0	0	0	0	0	0	0	0	0	0	0	0	0	0	0	0	0	0	0
OGG2-564	3	0	2	0	0	1	0	0	1	0	0	0	1	0	0	1	0	0	0	0	0	0	0	0	0	0	0	0	0	0	1	0	0	0	0	0	0	0	0	0	0	0
OGG1-132	3	0	2	0	0	0	0	0	0	3	0	2	0	0	0	0	0	0	0	0	0	0	0	0	0	0	0	0	0	0	0	0	0	0	0	0	0	0	0	0	0	0
OGG2-565	3	0	1	3	0	1	0	0	0	0	0	0	0	0	0	0	0	0	0	0	0	0	0	0	0	0	0	0	0	0	0	0	0	0	0	0	0	0	0	0	0	0
OGG2-566	3	0	1	1	0	0	1	0	0	0	0	0	1	0	1	0	0	0	0	0	0	0	0	0	0	0	0	0	0	0	0	0	0	0	0	0	0	0	0	0	0	0
OGG2-567	3	0	1	0	0	0	0	0	0	0	0	0	0	0	0	0	0	0	0	0	1	1	0	0	2	0	0	0	0	0	0	0	0	0	0	0	0	0	0	0	0	0
OGG2-568	3	0	0	1	0	0	0	0	0	1	0	0	1	0	0	0	0	0	0	0	0	0	0	0	0	0	0	0	0	0	0	0	0	0	0	0	0	0	0	0	0	0
OGG2-569	3	0	0	0	0	0	0	0	0	0	0	0	0	0	0	0	0	0	0	0	0	2	0	0	1	0	0	0	0	0	0	0	0	0	0	0	0	0	0	0	0	0
OGG2-570	3	0	0	0	0	0	0	0	0	0	0	0	0	0	0	0	0	0	0	0	0	0	0	0	0	0	0	1	0	0	0	0	0	1	0	0	0	0	0	1	0	0
OGG2-571	2	1	10	1	1	2	0	0	1	0	0	0	0	0	3	1	0	0	0	0	0	0	0	0	0	0	0	0	0	0	0	0	1	0	0	1	0	0	1	0	0	1
OGG2-572	2	1	6	1	0	0	0	0	1	0	0	1	0	0	2	0	0	0	0	0	0	0	0	0	0	0	0	1	0	0	0	0	0	0	1	0	0	0	1	0	0	1
OGG2-573	2	1	3	0	0	1	0	0	0	0	0	1	0	0	1	0	0	0	0	1	0	1	0	0	1	0	0	0	0	0	0	0	0	0	0	0	0	0	0	0	0	0
OGG2-574	2	1	0	0	0	0	0	0	0	1	0	0	1	0	0	0	1	0	0	0	0	0	0	0	0	0	0	0	0	0	0	0	0	0	0	0	0	0	0	0	0	0
OGG2-575	2	0	16	2	0	1	0	0	0	0	0	0	0	0	10	0	0	0	0	0	0	0	0	0	0	0	0	0	0	1	0	0	0	0	0	2	0	0	1	0	0	1
OGG1-133	2	0	13	0	0	3	0	0	3	1	0	0	1	0	0	0	0	1	0	0	3	0	0	1	0	0	1	0	0	1	0	0	0	0	0	0	0	0	0	0	0	0
OGG2-576	2	0	10	0	0	0	1	0	2	1	0	1	0	0	5	0	0	0	0	0	1	0	0	0	0	0	0	0	0	0	0	0	0	0	0	0	0	0	0	0	0	1
OGG2-577	2	0	9	2	0	9	0	0	0	0	0	0	0	0	0	0	0	0	0	0	0	0	0	0	0	0	0	0	0	0	0	0	0	0	0	0	0	0	0	0	0	0
OGG2-578	2	0	9	0	0	3	1	0	0	0	0	0	0	0	0	1	0	0	0	0	1	0	0	0	0	0	0	0	0	1	0	0	1	0	0	3	0	0	0	0	0	0
OGG2-579	2	0	9	0	0	2	0	0	1	0	0	1	0	0	1	1	0	0	1	0	0	0	0	0	0	0	0	0	0	0	0	0	0	0	0	2	0	0	1	0	0	1
OGG1-134	2	0	8	0	0	1	0	0	1	0	0	0	0	0	3	0	0	0	0	0	0	0	0	0	0	0	0	0	0	1	0	0	1	1	0	0	1	0	0	0	0	1
OGG1-135	2	0	7	1	0	0	0	0	6	1	0	0	0	0	1	0	0	0	0	0	0	0	0	0	0	0	0	0	0	0	0	0	0	0	0	0	0	0	0	0	0	0
OGG2-580	2	0	7	1	0	0	0	0	0	0	0	0	1	0	1	0	0	1	0	0	0	0	0	0	0	0	0	0	0	1	0	0	1	0	0	1	0	0	1	0	0	1
OGG2-581	2	0	7	0	0	1	0	0	0	1	0	0	1	0	1	0	0	0	0	0	0	0	0	0	0	0	0	0	0	1	0	0	0	0	0	2	0	0	1	0	0	1
OGG1-136	2	0	7	0	0	0	0	0	1	1	0	0	1	0	1	0	0	0	0	0	0	0	0	0	0	0	0	0	0	0	0	0	1	0	0	2	0	0	1	0	0	1
OGG2-582	2	0	6	1	0	0	0	0	0	0	0	0	0	0	2	0	0	0	0	0	2	0	0	0	0	0	0	1	0	0	0	0	0	0	0	0	0	0	1	0	0	1
OGG2-583	2	0	6	0	0	2	1	0	1	0	0	0	1	0	0	0	0	0	0	0	0	0	0	0	0	0	0	0	0	0	0	0	0	0	0	2	0	0	0	0	0	1
OGG1-137	2	0	4	1	0	2	0	0	1	1	0	0	0	0	1	0	0	0	0	0	0	0	0	0	0	0	0	0	0	0	0	0	0	0	0	0	0	0	0	0	0	0
OGG2-584	2	0	3	2	0	3	0	0	0	0	0	0	0	0	0	0	0	0	0	0	0	0	0	0	0	0	0	0	0	0	0	0	0	0	0	0	0	0	0	0	0	0
OGG2-585	2	0	3	2	0	2	0	0	0	0	0	0	0	0	0	0	0	0	0	0	0	0	0	0	0	0	0	0	0	0	0	0	1	0	0	0	0	0	0	0	0	0
OGG1-138	2	0	3	1	0	3	1	0	0	0	0	0	0	0	0	0	0	0	0	0	0	0	0	0	0	0	0	0	0	0	0	0	0	0	0	0	0	0	0	0	0	0
OGG2-586	2	0	3	0	0	1	1	0	0	0	0	0	0	0	0	0	0	0	0	0	1	1	0	0	0	0	1	0	0	0	0	0	0	0	0	0	0	0	0	0	0	0
OGG2-587	2	0	3	0	0	0	0	0	0	0	0	0	0	0	0	0	0	0	2	0	3	0	0	0	0	0	0	0	0	0	0	0	0	0	0	0	0	0	0	0	0	0
OGG2-588	2	0	2	1	0	1	0	0	1	0	0	0	1	0	0	0	0	0	0	0	0	0	0	0	0	0	0	0	0	0	0	0	0	0	0	0	0	0	0	0	0	0
OGG1-139	2	0	2	1	0	1	0	0	0	0	0	0	0	0	1	0	0	0	1	0	0	0	0	0	0	0	0	0	0	0	0	0	0	0	0	0	0	0	0	0	0	0
OGG2-589	2	0	2	1	0	1	0	0	0	0	0	0	0	0	0	0	0	0	0	0	0	0	0	0	0	0	0	1	0	0	0	0	0	0	0	1	0	0	0	0	0	0
OGG2-590	2	0	2	1	0	0	1	0	0	0	0	1	0	0	1	0	0	0	0	0	0	0	0	0	0	0	0	0	0	0	0	0	0	0	0	0	0	0	0	0	0	0
OGG2-591	2	0	2	1	0	0	0	0	1	0	0	1	1	0	0	0	0	0	0	0	0	0	0	0	0	0	0	0	0	0	0	0	0	0	0	0	0	0	0	0	0	0
OGG2-592	2	0	2	1	0	0	0	0	0	0	0	0	1	0	2	0	0	0	0	0	0	0	0	0	0	0	0	0	0	0	0	0	0	0	0	0	0	0	0	0	0	0
OGG2-593	2	0	2	0	0	2	1	0	0	0	0	0	1	0	0	0	0	0	0	0	0	0	0	0	0	0	0	0	0	0	0	0	0	0	0	0	0	0	0	0	0	0
OGG2-594	2	0	2	0	0	1	0	0	0	1	0	0	1	0	0	0	0	1	0	0	0	0	0	0	0	0	0	0	0	0	0	0	0	0	0	0	0	0	0	0	0	0
OGG2-595	2	0	2	0	0	0	0	0	1	1	0	0	0	0	1	1	0	0	0	0	0	0	0	0	0	0	0	0	0	0	0	0	0	0	0	0	0	0	0	0	0	0
OGG2-596	2	0	2	0	0	0	0	0	0	2	0	2	0	0	0	0	0	0	0	0	0	0	0	0	0	0	0	0	0	0	0	0	0	0	0	0	0	0	0	0	0	0
OGG2-597	2	0	1	1	0	1	1	0	0	0	0	0	0	0	0	0	0	0	0	0	0	0	0	0	0	0	0	0	0	0	0	0	0	0	0	0	0	0	0	0	0	0
OGG2-598	2	0	1	1	0	0	0	0	0	1	0	0	0	0	1	0	0	0	0	0	0	0	0	0	0	0	0	0	0	0	0	0	0	0	0	0	0	0	0	0	0	0
OGG2-599	2	0	0	1	0	0	0	0	0	0	0	0	1	0	0	0	0	0	0	0	0	0	0	0	0	0	0	0	0	0	0	0	0	0	0	0	0	0	0	0	0	0
OGG2-600	2	0	0	0	0	0	0	0	0	0	0	0	0	0	0	2	0	0	0	0	0	0	0	0	0	0	0	0	0	0	0	0	0	0	0	0	0	0	0	0	0	0
OGG2-601	2	0	0	0	0	0	0	0	0	0	0	0	0	0	0	0	0	0	0	0	0	1	0	0	1	0	0	0	0	0	0	0	0	0	0	0	0	0	0	0	0	0
OGG2-602	2	0	0	0	0	0	0	0	0	0	0	0	0	0	0	0	0	0	0	0	0	1	0	0	1	0	0	0	0	0	0	0	0	0	0	0	0	0	0	0	0	0
OGG2-603	2	0	0	0	0	0	0	0	0	0	0	0	0	0	0	0	0	0	0	0	0	0	0	0	2	0	0	0	0	0	0	0	0	0	0	0	0	0	0	0	0	0
OGG2-604	1	0	14	0	0	4	0	0	0	0	0	0	0	0	7	0	0	2	0	0	0	0	0	0	0	0	0	0	0	0	0	0	0	1	0	0	0	0	1	0	0	0
OGG2-605	1	0	12	0	0	1	1	0	2	0	0	1	0	0	6	0	0	0	0	0	0	0	0	0	0	0	0	0	0	0	0	0	0	0	0	0	0	0	1	0	0	1
OGG2-606	1	0	12	0	0	1	0	0	2	0	0	1	0	0	1	0	0	1	0	0	1	0	0	1	1	0	0	0	0	0	0	0	1	0	0	1	0	0	1	0	0	1
OGG2-607	1	0	7	1	0	7	0	0	0	0	0	0	0	0	0	0	0	0	0	0	0	0	0	0	0	0	0	0	0	0	0	0	0	0	0	0	0	0	0	0	0	0
OGG2-608	1	0	7	1	0	7	0	0	0	0	0	0	0	0	0	0	0	0	0	0	0	0	0	0	0	0	0	0	0	0	0	0	0	0	0	0	0	0	0	0	0	0
OGG1-140	1	0	7	1	0	2	0	0	2	0	0	1	0	0	1	0	0	0	0	0	0	0	0	0	0	0	0	0	0	0	0	0	0	0	0	1	0	0	0	0	0	0
OGG2-609	1	0	7	0	0	1	0	0	0	1	0	0	0	0	1	0	0	0	0	0	0	0	0	0	0	0	0	0	0	1	0	0	1	0	0	1	0	0	1	0	0	1
OGG2-610	1	0	6	1	0	0	0	0	0	0	0	1	0	0	1	0	0	0	0	0	0	0	0	0	0	0	0	0	0	1	0	0	1	0	0	1	0	0	0	0	0	1
OGG1-141	1	0	6	0	0	2	0	0	0	1	0	0	0	0	1	0	0	0	0	0	0	0	0	0	0	0	0	0	0	0	0	0	0	0	0	1	0	0	1	0	0	1
OGG1-142	1	0	5	1	0	4	0	0	0	0	0	0	0	0	1	0	0	0	0	0	0	0	0	0	0	0	0	0	0	0	0	0	0	0	0	0	0	0	0	0	0	0
OGG2-611	1	0	5	1	0	0	0	0	0	0	0	0	0	0	0	0	0	0	0	0	0	0	0	0	0	0	0	0	0	1	0	0	1	0	0	1	0	0	1	0	0	1
OGG2-612	1	0	5	0	0	2	1	0	0	0	0	2	0	0	0	0	0	1	0	0	0	0	0	0	0	0	0	0	0	0	0	0	0	0	0	0	0	0	0	0	0	0
OGG2-613	1	0	5	0	0	1	0	0	0	0	0	0	0	0	2	0	0	0	0	0	0	1	0	1	0	0	1	0	0	0	0	0	0	0	0	0	0	0	0	0	0	0
OGG1-143	1	0	5	0	0	0	0	0	3	0	0	1	1	0	1	0	0	0	0	0	0	0	0	0	0	0	0	0	0	0	0	0	0	0	0	0	0	0	0	0	0	0
OGG2-614	1	0	4	1	0	3	0	0	0	0	0	0	0	0	1	0	0	0	0	0	0	0	0	0	0	0	0	0	0	0	0	0	0	0	0	0	0	0	0	0	0	0
OGG2-615	1	0	4	0	0	1	0	0	2	0	0	1	1	0	0	0	0	0	0	0	0	0	0	0	0	0	0	0	0	0	0	0	0	0	0	0	0	0	0	0	0	0
OGG2-616	1	0	4	0	0	0	1	0	0	0	0	0	0	0	4	0	0	0	0	0	0	0	0	0	0	0	0	0	0	0	0	0	0	0	0	0	0	0	0	0	0	0
OGG2-617	1	0	3	1	0	3	0	0	0	0	0	0	0	0	0	0	0	0	0	0	0	0	0	0	0	0	0	0	0	0	0	0	0	0	0	0	0	0	0	0	0	0
OGG1-144	1	0	3	1	0	0	0	0	0	0	0	1	0	0	0	0	0	0	0	0	0	0	0	0	0	0	0	0	0	0	0	0	0	0	0	0	0	0	1	0	0	1
OGG1-145	1	0	3	0	0	2	0	0	0	1	0	0	0	0	1	0	0	0	0	0	0	0	0	0	0	0	0	0	0	0	0	0	0	0	0	0	0	0	0	0	0	0
OGG2-618	1	0	3	0	0	0	1	0	3	0	0	0	0	0	0	0	0	0	0	0	0	0	0	0	0	0	0	0	0	0	0	0	0	0	0	0	0	0	0	0	0	0
OGG2-619	1	0	3	0	0	0	1	0	0	0	0	1	0	0	0	0	0	0	0	0	0	0	0	1	0	0	1	0	0	0	0	0	0	0	0	0	0	0	0	0	0	0
OGG2-620	1	0	3	0	0	0	0	0	1	1	0	1	0	0	1	0	0	0	0	0	0	0	0	0	0	0	0	0	0	0	0	0	0	0	0	0	0	0	0	0	0	0
OGG2-621	1	0	2	1	0	2	0	0	0	0	0	0	0	0	0	0	0	0	0	0	0	0	0	0	0	0	0	0	0	0	0	0	0	0	0	0	0	0	0	0	0	0
OGG2-622	1	0	2	1	0	0	0	0	1	0	0	0	0	0	1	0	0	0	0	0	0	0	0	0	0	0	0	0	0	0	0	0	0	0	0	0	0	0	0	0	0	0
OGG2-623	1	0	2	1	0	0	0	0	1	0	0	0	0	0	0	0	0	0	0	0	1	0	0	0	0	0	0	0	0	0	0	0	0	0	0	0	0	0	0	0	0	0
OGG2-624	1	0	2	0	0	0	0	0	1	1	0	1	0	0	0	0	0	0	0	0	0	0	0	0	0	0	0	0	0	0	0	0	0	0	0	0	0	0	0	0	0	0
OGG2-625	1	0	2	0	0	0	0	0	0	0	0	1	1	0	1	0	0	0	0	0	0	0	0	0	0	0	0	0	0	0	0	0	0	0	0	0	0	0	0	0	0	0
OGG2-626	1	0	2	0	0	0	0	0	0	0	0	0	1	0	2	0	0	0	0	0	0	0	0	0	0	0	0	0	0	0	0	0	0	0	0	0	0	0	0	0	0	0
OGG2-627	1	0	2	0	0	0	0	0	0	0	0	0	0	0	0	1	0	2	0	0	0	0	0	0	0	0	0	0	0	0	0	0	0	0	0	0	0	0	0	0	0	0
OGG2-628	1	0	2	0	0	0	0	0	0	0	0	0	0	0	0	0	0	0	0	0	1	0	0	0	0	0	0	0	0	0	1	0	0	0	0	1	0	0	0	0	0	0
OGG2-629	1	0	1	1	0	1	0	0	0	0	0	0	0	0	0	0	0	0	0	0	0	0	0	0	0	0	0	0	0	0	0	0	0	0	0	0	0	0	0	0	0	0
OGG2-630	1	0	1	1	0	1	0	0	0	0	0	0	0	0	0	0	0	0	0	0	0	0	0	0	0	0	0	0	0	0	0	0	0	0	0	0	0	0	0	0	0	0
OGG2-631	1	0	1	1	0	0	0	0	1	0	0	0	0	0	0	0	0	0	0	0	0	0	0	0	0	0	0	0	0	0	0	0	0	0	0	0	0	0	0	0	0	0
OGG2-632	1	0	1	0	0	0	0	0	0	0	0	0	1	0	1	0	0	0	0	0	0	0	0	0	0	0	0	0	0	0	0	0	0	0	0	0	0	0	0	0	0	0
OGG2-633	1	0	1	0	0	0	0	0	0	0	0	0	0	0	0	0	0	0	0	0	0	0	0	1	1	0	0	0	0	0	0	0	0	0	0	0	0	0	0	0	0	0
OGG2-634	1	0	0	0	0	0	0	0	0	0	0	0	1	0	0	0	0	0	0	0	0	0	0	0	0	0	0	0	0	0	0	0	0	0	0	0	0	0	0	0	0	0
OGG2-635	1	0	0	0	0	0	0	0	0	0	0	0	1	0	0	0	0	0	0	0	0	0	0	0	0	0	0	0	0	0	0	0	0	0	0	0	0	0	0	0	0	0
OGG2-636	1	0	0	0	0	0	0	0	0	0	0	0	0	0	0	1	0	0	0	0	0	0	0	0	0	0	0	0	0	0	0	0	0	0	0	0	0	0	0	0	0	0
TOTAL	10659	364	9312	1948	89	2230	1186	41	1057	811	11	278	1066	23	1569	768	22	256	796	26	1340	1207	52	508	1130	0	236	366	27	231	309	17	280	296	37	488	380	19	414	396	0	425
